# Supplementary material for: PLA2G16 expression predicts prognosis and gemcitabine sensitivity in patients with pancreatic cancer
Source: PeerJ journal article supplement (doi:10.7717/peerj.19517), 2025-05-30
Supplement: FIG3B3I.zip [file 4H.xlsx]

## Sheet: 吸光度 1_01
检测结果
新程序 (169)
2024/3/26 19:43:05
吸光度 1
波长: 450 nm
板 1
吸光值	1	2	3	4	5	6	7	8	9	10	11	12
A	0.0584	0.0483	0.0477	0.0466	0.3016	1.7547	1.0657	1.0913	0.9833	1.1143	0.4224	0.4145
B	0.1405	0.1695	0.2017	0.1724	0.3031	0.5323	0.8241	0.8347	0.7872	0.7738	0.588	0.4981
C	0.1436	0.1673	0.1984	0.1674	0.3856	0.5474	0.8192	0.7761	0.864	0.5952	0.5243	0.4198
D	0.1432	0.1634	0.1985	0.1667	0.3215	0.5397	0.7965	0.7334	0.7992	0.5497	0.5152	0.3969
E	0.1422	0.1658	0.1976	0.1701	0.2759	0.5489	0.8066	0.7578	0.6222	0.6228	0.5933	0.5532
F	0.1401	0.1616	0.1987	0.1817	0.2454	0.5851	1.0864	0.8611	0.5209	0.7134	0.5502	0.3387
G	0.0464	0.0512	0.0538	0.0554	0.3132	0.3902	0.8253	0.8854	0.6443	0.6054	0.385	0.4298
H	0.0544	0.043	0.0432	0.0464	0.2786	0.3692	0.9408	0.4188	0.5301	0.5583	0.4608	0.3313
样本	1	2	3	4	5	6	7	8	9	10	11	12
A
B
C
D
E
F
G
H
