# Supplementary material for: PLA2G16 expression predicts prognosis and gemcitabine sensitivity in patients with pancreatic cancer
Source: PeerJ journal article supplement (doi:10.7717/peerj.19517), 2025-05-30
Supplement: FIG3B3I.zip [file 24H.xlsx]

## Sheet: 吸光度 1_01
检测结果
新程序 (184)
2024/3/27 12:45:41
吸光度 1
波长: 450 nm
板 1
吸光值	1	2	3	4	5	6	7	8	9	10	11	12
A	0.0578	0.0479	0.0489	0.0473	0.052	0.057	0.0472	0.0503	1.0416	1.5019	1.3841	1.1532
B	0.1635	0.4158	0.7611	0.5908	0.139	0.1769	0.2507	0.1901	1.2283	1.4267	1.4125	1.1293
C	0.1696	0.4332	0.8394	0.4171	0.139	0.1815	0.2541	0.1916	0.824	1.0353	0.906	0.3503
D	0.1639	0.4	0.7511	0.4125	0.1358	0.1906	0.255	0.1871	0.6717	0.8982	0.947	0.2899
E	0.1631	0.4196	0.7469	0.4326	0.1404	0.1889	0.2571	0.1899	0.6598	0.905	1.0485	0.2666
F	0.1707	0.3855	0.7392	0.4411	0.1369	0.1941	0.2582	0.2234	0.6886	0.9227	1.4136	0.2724
G	0.0469	0.0633	0.0906	0.0567	0.0682	0.0568	0.0581	0.0534	0.6619	0.69	1.1858	0.2272
H	0.056	0.0556	0.0507	0.0477	0.054	0.0628	0.0548	0.0552	0.2542	0.5323	0.5946	0.2583
样本	1	2	3	4	5	6	7	8	9	10	11	12
A
B
C
D
E
F
G
H
