# Supplementary material for: PLA2G16 expression predicts prognosis and gemcitabine sensitivity in patients with pancreatic cancer
Source: PeerJ journal article supplement (doi:10.7717/peerj.19517), 2025-05-30
Supplement: FIG3B3I.zip [file 48H.xlsx]

## Sheet: 吸光度 1_01
检测结果
BAI (3)
2024/3/28 12:25:51
吸光度 1
波长: 450 nm
板 1
吸光值	1	2	3	4	5	6	7	8	9	10	11	12
A	0.0585	0.0484	0.0488	0.0471	0.0522	0.0553	0.0473	0.0476	0.0529	0.0515	0.0454	0.0615
B	0.1922	0.5656	1.0474	0.9205	0.2105	0.8192	1.877	0.9896	0.2486	0.3649	0.2489	0.1415
C	0.2411	0.5906	1.227	0.5659	0.2083	0.9023	1.9283	0.9944	0.2446	0.3645	0.2407	0.1907
D	0.2011	0.609	1.0511	0.6852	0.2218	0.9191	1.9711	0.9777	0.2476	0.3749	0.2422	0.1558
E	0.2021	0.57	1.0398	0.6023	0.2159	0.948	1.9296	1.0002	0.248	0.367	0.2372	0.1787
F	0.2041	0.5626	1.043	0.6084	0.209	0.9427	1.9605	0.9702	0.2564	0.3571	0.2476	0.1691
G	0.0473	0.0551	0.0873	0.0536	0.059	0.0522	0.0557	0.0524	0.0634	0.057	0.0554	0.0539
H	0.056	0.0768	0.0495	0.0504	0.0541	0.0645	0.0545	0.0553	0.0654	0.091	0.0632	0.0585
样本	1	2	3	4	5	6	7	8	9	10	11	12
A
B
C
D
E
F
G
H
