# Supplementary material for: PLA2G16 expression predicts prognosis and gemcitabine sensitivity in patients with pancreatic cancer
Source: PeerJ journal article supplement (doi:10.7717/peerj.19517), 2025-05-30
Supplement: FIG3B3I.zip [file 72H.xlsx]

## Sheet: 吸光度 1_01
检测结果
新程序 (215)
2024/3/29 12:27:29
吸光度 1
波长: 450 nm
板 1
吸光值	1	2	3	4	5	6	7	8	9	10	11	12
A	0.0589	0.0488	0.0478	0.0483	0.0534	0.369	0.8642	1.1154	1.1252	1.3371	0.7002	0.0577
B	0.1126	0.2621	0.4749	0.2733	0.053	0.5241	1.0853	1.0236	1.167	1.807	0.9592	0.0487
C	0.1169	0.2783	0.4856	0.2562	0.0588	0.5574	0.906	1.1196	1.3566	1.0374	0.4717	0.0495
D	0.1187	0.2846	0.4563	0.2615	0.0539	0.4698	0.9414	1.2008	1.1668	1.0453	0.8271	0.0557
E	0.1208	0.309	0.4509	0.2476	0.0546	0.4418	0.4634	1.0325	1.4906	1.3114	0.7666	0.0506
F	0.1312	0.3022	0.4467	0.272	0.0562	0.4198	0.5999	1.0543	0.8665	1.4263	1.0521	0.14
G	0.1802	0.0351	0.0426	0.0453	0.0524	0.339	0.4477	0.6792	0.7328	1.4039	1.0817	0.2664
H	0.0553	0.0437	0.0433	0.0463	0.0486	0.348	0.8411	0.6913	0.8418	1.4464	1.0716	0.3205
样本	1	2	3	4	5	6	7	8	9	10	11	12
A
B
C
D
E
F
G
H
