# Supplementary material for: PLA2G16 expression predicts prognosis and gemcitabine sensitivity in patients with pancreatic cancer
Source: PeerJ journal article supplement (doi:10.7717/peerj.19517), 2025-05-30
Supplement: FIG3B3I.zip [file 96H.xlsx]

## Sheet: 吸光度 1_01
检测结果
MIAN (11)
2024/3/30 12:06:39
吸光度 1
波长: 450 nm
板 1
吸光值	1	2	3	4	5	6	7	8	9	10	11	12
A	0.0592	0.0491	0.048	0.0481	0.053	0.0474	0.0627	0.0514	0.6878	0.7479	0.797	0.8504
B	0.1677	1.6685	3.8604	1.7912	0.128	0.6634	1.0858	0.5547	0.9047	1.2217	0.7458	0.3484
C	0.1681	1.9732	3.8601	1.633	0.1319	0.677	1.0451	0.555	0.8352	0.831	1.0349	0.4739
D	0.174	2.0611	3.8879	1.6745	0.1415	0.672	1.0637	0.5806	0.8869	0.6755	0.7845	0.7547
E	0.1771	2.4054	3.9875	1.5645	0.1384	0.6926	1.0306	0.5517	0.668	0.8063	0.6941	0.6969
F	0.1919	2.234	3.8229	1.7601	0.1453	0.6826	1.0697	0.5773	1.8289	0.7579	0.7299	0.3835
G	0.1817	0.0515	0.0534	0.0559	0.0532	0.0529	0.053	0.0561	0.2714	0.2497	0.2906	0.3314
H	0.053	0.0429	0.0446	0.0451	0.0482	0.0433	0.0451	0.0476	0.9214	0.3556	0.2942	0.314
样本	1	2	3	4	5	6	7	8	9	10	11	12
A
B
C
D
E
F
G
H
