# Supplementary material for: PLA2G16 expression predicts prognosis and gemcitabine sensitivity in patients with pancreatic cancer
Source: PeerJ journal article supplement (doi:10.7717/peerj.19517), 2025-05-30
Supplement: FIG3B3I.zip [file 120H.xlsx]

## Sheet: 吸光度 1_01
检测结果
116 (21)
2024/3/31 16:52:40
吸光度 1
波长: 450 nm
板 1
吸光值	1	2	3	4	5	6	7	8	9	10	11	12
A	0.0588	0.0479	0.0474	0.0482	0.0528	0.0472	0.0494	0.0511	0.0491	0.0494	0.0473	0.0572
B	0.1854	2.1365	3.8136	2.2154	0.2203	4.7928	4.9056	4.6903	0.8099	1.1236	0.6998	0.1386
C	0.1871	2.5224	3.8089	1.9784	0.2217	4.6301	4.8161	5.0712	0.7917	1.1	0.6843	0.1434
D	0.194	2.5994	3.8473	2.0781	0.2435	4.7455	4.8755	4.8416	0.8028	1.1087	0.6515	0.1468
E	0.1997	3.0596	3.9084	1.94	0.232	4.6441	4.6747	4.6908	0.7912	1.1131	0.6701	0.1457
F	0.2149	2.8215	3.7785	2.1488	0.2342	4.7775	4.7655	4.7171	0.8076	1.122	0.6975	0.1443
G	0.1876	0.0532	0.0538	0.0551	0.0521	0.0528	0.0536	0.0559	0.0647	0.056	0.0541	0.0458
H	0.0554	0.0435	0.0486	0.0459	0.049	0.0379	0.0472	0.0493	0.0461	0.0436	0.0485	0.0598
样本	1	2	3	4	5	6	7	8	9	10	11	12
A
B
C
D
E
F
G
H
