# Supplementary material for: PLA2G16 expression predicts prognosis and gemcitabine sensitivity in patients with pancreatic cancer
Source: PeerJ journal article supplement (doi:10.7717/peerj.19517), 2025-05-30
Supplement: FIG3B3I.zip [file admin_2023-08-31 11-19-35_CT052869 - End Point Results.xlsx › xl/styles.xml]

<?xml version="1.0"?>
<styleSheet xmlns:xsi="http://www.w3.org/2001/XMLSchema-instance" xmlns:xsd="http://www.w3.org/2001/XMLSchema" xmlns="http://schemas.openxmlformats.org/spreadsheetml/2006/main">
  <numFmts count="2">
    <numFmt numFmtId="1000" formatCode="###0.00;-###0.00" />
    <numFmt numFmtId="1001" formatCode="###0;-###0" />
  </numFmts>
  <fonts count="15">
    <font>
      <charset val="1" />
      <name val="Microsoft Sans Serif" />
      <sz val="8.25" />
    </font>
    <font>
      <charset val="1" />
      <name val="Microsoft Sans Serif" />
      <sz val="8.25" />
    </font>
    <font>
      <charset val="1" />
      <name val="Microsoft Sans Serif" />
      <sz val="8.25" />
    </font>
    <font>
      <charset val="1" />
      <name val="Microsoft Sans Serif" />
      <sz val="8.25" />
    </font>
    <font>
      <charset val="1" />
      <name val="Microsoft Sans Serif" />
      <sz val="8.25" />
    </font>
    <font>
      <charset val="1" />
      <name val="Microsoft Sans Serif" />
      <sz val="8.25" />
    </font>
    <font>
      <charset val="1" />
      <name val="Microsoft Sans Serif" />
      <sz val="8.25" />
    </font>
    <font>
      <charset val="1" />
      <name val="Microsoft Sans Serif" />
      <sz val="8.25" />
    </font>
    <font>
      <charset val="1" />
      <name val="Microsoft Sans Serif" />
      <sz val="8.25" />
    </font>
    <font>
      <charset val="1" />
      <name val="Microsoft Sans Serif" />
      <sz val="8.25" />
    </font>
    <font>
      <charset val="1" />
      <name val="Microsoft Sans Serif" />
      <sz val="8.25" />
    </font>
    <font>
      <charset val="1" />
      <name val="Microsoft Sans Serif" />
      <sz val="8.25" />
    </font>
    <font>
      <charset val="1" />
      <name val="Microsoft Sans Serif" />
      <sz val="8.25" />
    </font>
    <font>
      <charset val="1" />
      <name val="Microsoft Sans Serif" />
      <sz val="8.25" />
    </font>
    <font>
      <charset val="1" />
      <name val="Microsoft Sans Serif" />
      <sz val="8.25" />
    </font>
  </fonts>
  <fills count="5">
    <fill>
      <patternFill patternType="none" />
    </fill>
    <fill>
      <patternFill patternType="gray125" />
    </fill>
    <fill>
      <patternFill patternType="solid">
        <fgColor rgb="FFD3DCE9" />
        <bgColor rgb="00000000" />
      </patternFill>
    </fill>
    <fill>
      <patternFill patternType="solid">
        <fgColor rgb="FFE4ECF7" />
        <bgColor rgb="00000000" />
      </patternFill>
    </fill>
    <fill>
      <patternFill patternType="solid">
        <fgColor rgb="FFA9C4E9" />
        <bgColor rgb="00000000" />
      </patternFill>
    </fill>
  </fills>
  <borders count="1">
    <border>
      <left />
      <right />
      <top />
      <bottom />
      <diagonal />
    </border>
  </borders>
  <cellStyleXfs count="1">
    <xf fontId="1" fillId="0" borderId="0" xfId="0" applyFont="true" applyFill="true" applyBorder="true" applyAlignment="true" applyProtection="true">
      <alignment vertical="top" />
      <protection locked="false" />
    </xf>
  </cellStyleXfs>
  <cellXfs count="14">
    <xf fontId="1" fillId="0" borderId="0" xfId="0" applyFont="true" applyFill="true" applyBorder="true" applyAlignment="true" applyProtection="true">
      <alignment vertical="top" />
      <protection locked="false" />
    </xf>
    <xf fontId="2" fillId="0" borderId="0" xfId="0" applyFont="true" applyFill="true" applyBorder="true" applyAlignment="true">
      <alignment vertical="center" />
    </xf>
    <xf fontId="3" fillId="2" borderId="0" xfId="0" applyFont="true" applyFill="true" applyBorder="true" applyAlignment="true" applyProtection="true">
      <alignment horizontal="center" vertical="center" />
      <protection locked="false" />
    </xf>
    <xf fontId="4" fillId="2" borderId="0" xfId="0" applyFont="true" applyFill="true" applyBorder="true" applyAlignment="true" applyProtection="true">
      <alignment horizontal="center" vertical="center" wrapText="true" />
      <protection locked="false" />
    </xf>
    <xf fontId="5" fillId="3" borderId="0" xfId="0" applyFont="true" applyFill="true" applyBorder="true" applyAlignment="true" applyProtection="true">
      <alignment horizontal="center" vertical="center" />
      <protection locked="false" />
    </xf>
    <xf numFmtId="49" fontId="6" fillId="4" borderId="0" xfId="0" applyNumberFormat="true" applyFont="true" applyFill="true" applyBorder="true" applyAlignment="true" applyProtection="true">
      <alignment horizontal="center" vertical="center" />
      <protection locked="false" />
    </xf>
    <xf numFmtId="49" fontId="7" fillId="0" borderId="0" xfId="0" applyNumberFormat="true" applyFont="true" applyFill="true" applyBorder="true" applyAlignment="true">
      <alignment vertical="center" />
    </xf>
    <xf numFmtId="49" fontId="8" fillId="0" borderId="0" xfId="0" applyNumberFormat="true" applyFont="true" applyFill="true" applyBorder="true" applyAlignment="true">
      <alignment vertical="center" />
    </xf>
    <xf numFmtId="1000" fontId="9" fillId="0" borderId="0" xfId="0" applyNumberFormat="true" applyFont="true" applyFill="true" applyBorder="true" applyAlignment="true">
      <alignment vertical="center" />
    </xf>
    <xf numFmtId="1001" fontId="10" fillId="0" borderId="0" xfId="0" applyNumberFormat="true" applyFont="true" applyFill="true" applyBorder="true" applyAlignment="true">
      <alignment vertical="center" />
    </xf>
    <xf fontId="11" fillId="0" borderId="0" xfId="0" applyFont="true" applyFill="true" applyBorder="true" applyAlignment="true">
      <alignment vertical="center" />
    </xf>
    <xf numFmtId="49" fontId="12" fillId="0" borderId="0" xfId="0" applyNumberFormat="true" applyFont="true" applyFill="true" applyBorder="true" applyAlignment="true" applyProtection="true">
      <alignment vertical="top" />
      <protection locked="false" />
    </xf>
    <xf fontId="13" fillId="4" borderId="0" xfId="0" applyFont="true" applyFill="true" applyBorder="true" applyAlignment="true" applyProtection="true">
      <alignment horizontal="center" vertical="center" />
      <protection locked="false" />
    </xf>
    <xf numFmtId="1001" fontId="14" fillId="0" borderId="0" xfId="0" applyNumberFormat="true" applyFont="true" applyFill="true" applyBorder="true" applyAlignment="true" applyProtection="true">
      <alignment horizontal="left" vertical="top" />
      <protection locked="false" />
    </xf>
  </cellXfs>
  <cellStyles count="1">
    <cellStyle name="Normal" xfId="0" />
  </cellStyles>
  <dxfs />
</styleSheet>
