# Supplementary material for: PLA2G16 expression predicts prognosis and gemcitabine sensitivity in patients with pancreatic cancer
Source: PeerJ journal article supplement (doi:10.7717/peerj.19517), 2025-05-30
Supplement: FIG3B3I.zip [file admin_2023-08-31 11-19-35_CT052869 - End Point Results.xlsx › xl/workbook.xml]

<?xml version="1.0"?>
<workbook xmlns:xsi="http://www.w3.org/2001/XMLSchema-instance" xmlns:xsd="http://www.w3.org/2001/XMLSchema" xmlns="http://schemas.openxmlformats.org/spreadsheetml/2006/main">
  <bookViews>
    <workbookView tabRatio="500" />
  </bookViews>
  <sheets>
    <sheet name="SYBR" sheetId="1" d3p1:id="rId1" xmlns:d3p1="http://schemas.openxmlformats.org/officeDocument/2006/relationships" />
    <sheet name="Run Information" sheetId="2" d3p1:id="rId2" xmlns:d3p1="http://schemas.openxmlformats.org/officeDocument/2006/relationships" />
  </sheets>
  <calcPr iterateCount="1" />
</workbook>
