# Supplementary material for: PLA2G16 expression predicts prognosis and gemcitabine sensitivity in patients with pancreatic cancer
Source: PeerJ journal article supplement (doi:10.7717/peerj.19517), 2025-05-30
Supplement: FIG3B3I.zip [file admin_2023-08-31 11-19-35_CT052869 - Melt Curve Derivative Results.xlsx › xl/worksheets/sheet1.xml]

<?xml version="1.0"?>
<worksheet xmlns:xsi="http://www.w3.org/2001/XMLSchema-instance" xmlns:xsd="http://www.w3.org/2001/XMLSchema" xmlns="http://schemas.openxmlformats.org/spreadsheetml/2006/main">
  <sheetPr>
    <pageSetUpPr />
  </sheetPr>
  <dimension ref="A1:CT62" />
  <sheetViews>
    <sheetView tabSelected="true" workbookViewId="0">
      <pane xSplit="1" ySplit="1" topLeftCell="B2" state="frozen" />
      <selection pane="bottomRight" activeCell="B2" sqref="B2:B2" />
      <selection pane="topRight" activeCell="B2" sqref="B2:B2" />
      <selection pane="bottomLeft" activeCell="B2" sqref="B2:B2" />
      <selection activeCell="B2" sqref="B2:B2" />
    </sheetView>
  </sheetViews>
  <sheetFormatPr defaultColWidth="10" defaultRowHeight="15" customHeight="true" />
  <cols>
    <col min="1" max="1" width="1.5" style="4" customWidth="true" />
    <col min="2" max="2" width="12.5" style="6" customWidth="true" />
    <col min="3" max="98" width="8.33" style="6" customWidth="true" />
    <col min="99" max="16384" width="10" style="1" customWidth="true" />
  </cols>
  <sheetData>
    <row r="1" spans="1:98" s="2" customFormat="true" ht="15" customHeight="true">
      <c r="A1" s="5" />
      <c r="B1" s="3" t="s">
        <v>0</v>
      </c>
      <c r="C1" s="3" t="s">
        <v>1</v>
      </c>
      <c r="D1" s="3" t="s">
        <v>2</v>
      </c>
      <c r="E1" s="3" t="s">
        <v>3</v>
      </c>
      <c r="F1" s="3" t="s">
        <v>4</v>
      </c>
      <c r="G1" s="3" t="s">
        <v>5</v>
      </c>
      <c r="H1" s="3" t="s">
        <v>6</v>
      </c>
      <c r="I1" s="3" t="s">
        <v>7</v>
      </c>
      <c r="J1" s="3" t="s">
        <v>8</v>
      </c>
      <c r="K1" s="3" t="s">
        <v>9</v>
      </c>
      <c r="L1" s="3" t="s">
        <v>10</v>
      </c>
      <c r="M1" s="3" t="s">
        <v>11</v>
      </c>
      <c r="N1" s="3" t="s">
        <v>12</v>
      </c>
      <c r="O1" s="3" t="s">
        <v>13</v>
      </c>
      <c r="P1" s="3" t="s">
        <v>14</v>
      </c>
      <c r="Q1" s="3" t="s">
        <v>15</v>
      </c>
      <c r="R1" s="3" t="s">
        <v>16</v>
      </c>
      <c r="S1" s="3" t="s">
        <v>17</v>
      </c>
      <c r="T1" s="3" t="s">
        <v>18</v>
      </c>
      <c r="U1" s="3" t="s">
        <v>19</v>
      </c>
      <c r="V1" s="3" t="s">
        <v>20</v>
      </c>
      <c r="W1" s="3" t="s">
        <v>21</v>
      </c>
      <c r="X1" s="3" t="s">
        <v>22</v>
      </c>
      <c r="Y1" s="3" t="s">
        <v>23</v>
      </c>
      <c r="Z1" s="3" t="s">
        <v>24</v>
      </c>
      <c r="AA1" s="3" t="s">
        <v>25</v>
      </c>
      <c r="AB1" s="3" t="s">
        <v>26</v>
      </c>
      <c r="AC1" s="3" t="s">
        <v>27</v>
      </c>
      <c r="AD1" s="3" t="s">
        <v>28</v>
      </c>
      <c r="AE1" s="3" t="s">
        <v>29</v>
      </c>
      <c r="AF1" s="3" t="s">
        <v>30</v>
      </c>
      <c r="AG1" s="3" t="s">
        <v>31</v>
      </c>
      <c r="AH1" s="3" t="s">
        <v>32</v>
      </c>
      <c r="AI1" s="3" t="s">
        <v>33</v>
      </c>
      <c r="AJ1" s="3" t="s">
        <v>34</v>
      </c>
      <c r="AK1" s="3" t="s">
        <v>35</v>
      </c>
      <c r="AL1" s="3" t="s">
        <v>36</v>
      </c>
      <c r="AM1" s="3" t="s">
        <v>37</v>
      </c>
      <c r="AN1" s="3" t="s">
        <v>38</v>
      </c>
      <c r="AO1" s="3" t="s">
        <v>39</v>
      </c>
      <c r="AP1" s="3" t="s">
        <v>40</v>
      </c>
      <c r="AQ1" s="3" t="s">
        <v>41</v>
      </c>
      <c r="AR1" s="3" t="s">
        <v>42</v>
      </c>
      <c r="AS1" s="3" t="s">
        <v>43</v>
      </c>
      <c r="AT1" s="3" t="s">
        <v>44</v>
      </c>
      <c r="AU1" s="3" t="s">
        <v>45</v>
      </c>
      <c r="AV1" s="3" t="s">
        <v>46</v>
      </c>
      <c r="AW1" s="3" t="s">
        <v>47</v>
      </c>
      <c r="AX1" s="3" t="s">
        <v>48</v>
      </c>
      <c r="AY1" s="3" t="s">
        <v>49</v>
      </c>
      <c r="AZ1" s="3" t="s">
        <v>50</v>
      </c>
      <c r="BA1" s="3" t="s">
        <v>51</v>
      </c>
      <c r="BB1" s="3" t="s">
        <v>52</v>
      </c>
      <c r="BC1" s="3" t="s">
        <v>53</v>
      </c>
      <c r="BD1" s="3" t="s">
        <v>54</v>
      </c>
      <c r="BE1" s="3" t="s">
        <v>55</v>
      </c>
      <c r="BF1" s="3" t="s">
        <v>56</v>
      </c>
      <c r="BG1" s="3" t="s">
        <v>57</v>
      </c>
      <c r="BH1" s="3" t="s">
        <v>58</v>
      </c>
      <c r="BI1" s="3" t="s">
        <v>59</v>
      </c>
      <c r="BJ1" s="3" t="s">
        <v>60</v>
      </c>
      <c r="BK1" s="3" t="s">
        <v>61</v>
      </c>
      <c r="BL1" s="3" t="s">
        <v>62</v>
      </c>
      <c r="BM1" s="3" t="s">
        <v>63</v>
      </c>
      <c r="BN1" s="3" t="s">
        <v>64</v>
      </c>
      <c r="BO1" s="3" t="s">
        <v>65</v>
      </c>
      <c r="BP1" s="3" t="s">
        <v>66</v>
      </c>
      <c r="BQ1" s="3" t="s">
        <v>67</v>
      </c>
      <c r="BR1" s="3" t="s">
        <v>68</v>
      </c>
      <c r="BS1" s="3" t="s">
        <v>69</v>
      </c>
      <c r="BT1" s="3" t="s">
        <v>70</v>
      </c>
      <c r="BU1" s="3" t="s">
        <v>71</v>
      </c>
      <c r="BV1" s="3" t="s">
        <v>72</v>
      </c>
      <c r="BW1" s="3" t="s">
        <v>73</v>
      </c>
      <c r="BX1" s="3" t="s">
        <v>74</v>
      </c>
      <c r="BY1" s="3" t="s">
        <v>75</v>
      </c>
      <c r="BZ1" s="3" t="s">
        <v>76</v>
      </c>
      <c r="CA1" s="3" t="s">
        <v>77</v>
      </c>
      <c r="CB1" s="3" t="s">
        <v>78</v>
      </c>
      <c r="CC1" s="3" t="s">
        <v>79</v>
      </c>
      <c r="CD1" s="3" t="s">
        <v>80</v>
      </c>
      <c r="CE1" s="3" t="s">
        <v>81</v>
      </c>
      <c r="CF1" s="3" t="s">
        <v>82</v>
      </c>
      <c r="CG1" s="3" t="s">
        <v>83</v>
      </c>
      <c r="CH1" s="3" t="s">
        <v>84</v>
      </c>
      <c r="CI1" s="3" t="s">
        <v>85</v>
      </c>
      <c r="CJ1" s="3" t="s">
        <v>86</v>
      </c>
      <c r="CK1" s="3" t="s">
        <v>87</v>
      </c>
      <c r="CL1" s="3" t="s">
        <v>88</v>
      </c>
      <c r="CM1" s="3" t="s">
        <v>89</v>
      </c>
      <c r="CN1" s="3" t="s">
        <v>90</v>
      </c>
      <c r="CO1" s="3" t="s">
        <v>91</v>
      </c>
      <c r="CP1" s="3" t="s">
        <v>92</v>
      </c>
      <c r="CQ1" s="3" t="s">
        <v>93</v>
      </c>
      <c r="CR1" s="3" t="s">
        <v>94</v>
      </c>
      <c r="CS1" s="3" t="s">
        <v>95</v>
      </c>
      <c r="CT1" s="3" t="s">
        <v>96</v>
      </c>
    </row>
    <row r="2" spans="2:98" ht="15" customHeight="true">
      <c r="B2" s="6">
        <v>65</v>
      </c>
      <c r="C2" s="6">
        <v>-5.75042645466488</v>
      </c>
      <c r="D2" s="6">
        <v>-3.10775154918838</v>
      </c>
      <c r="E2" s="6">
        <v>-2.53466451379609</v>
      </c>
      <c r="F2" s="6">
        <v>-1.13450557930298</v>
      </c>
      <c r="G2" s="6">
        <v>-6.36442125242331</v>
      </c>
      <c r="H2" s="6">
        <v>-3.70246681420667</v>
      </c>
      <c r="I2" s="6">
        <v>-2.99504745052161</v>
      </c>
      <c r="J2" s="6">
        <v>-6.0667585564322</v>
      </c>
      <c r="K2" s="6">
        <v>-5.16628806832341</v>
      </c>
      <c r="L2" s="6">
        <v>0.884913289825818</v>
      </c>
      <c r="M2" s="6">
        <v>0.54355307713098</v>
      </c>
      <c r="N2" s="6">
        <v>0.322008044779182</v>
      </c>
      <c r="O2" s="6">
        <v>-3.61660817410905</v>
      </c>
      <c r="P2" s="6">
        <v>-3.94914102823407</v>
      </c>
      <c r="Q2" s="6">
        <v>-3.95830203494711</v>
      </c>
      <c r="R2" s="6">
        <v>-1.58595810864858</v>
      </c>
      <c r="S2" s="6">
        <v>-1.93046953277644</v>
      </c>
      <c r="T2" s="6">
        <v>-2.71722823539471</v>
      </c>
      <c r="U2" s="6">
        <v>-2.14097005285475</v>
      </c>
      <c r="V2" s="6">
        <v>-0.361097398243146</v>
      </c>
      <c r="W2" s="6">
        <v>-4.22538876422163</v>
      </c>
      <c r="X2" s="6">
        <v>0.417094727640972</v>
      </c>
      <c r="Y2" s="6">
        <v>0.983156785418885</v>
      </c>
      <c r="Z2" s="6">
        <v>0.0600606105277848</v>
      </c>
      <c r="AA2" s="6">
        <v>-4.26826283843911</v>
      </c>
      <c r="AB2" s="6">
        <v>-6.55279335613818</v>
      </c>
      <c r="AC2" s="6">
        <v>-5.23623093974061</v>
      </c>
      <c r="AD2" s="6">
        <v>-3.43148582714173</v>
      </c>
      <c r="AE2" s="6">
        <v>-5.2088148256264</v>
      </c>
      <c r="AF2" s="6">
        <v>-4.59354367865228</v>
      </c>
      <c r="AG2" s="6">
        <v>-8.43871767219434</v>
      </c>
      <c r="AH2" s="6">
        <v>-2.69944226671055</v>
      </c>
      <c r="AI2" s="6">
        <v>-3.63403637805186</v>
      </c>
      <c r="AJ2" s="6">
        <v>0.67944895529746</v>
      </c>
      <c r="AK2" s="6">
        <v>0.213618824740308</v>
      </c>
      <c r="AL2" s="6">
        <v>0.170306082122181</v>
      </c>
      <c r="AM2" s="6">
        <v>-5.10697175435484</v>
      </c>
      <c r="AN2" s="6">
        <v>-6.00791786729371</v>
      </c>
      <c r="AO2" s="6">
        <v>-0.201275590707724</v>
      </c>
      <c r="AP2" s="6">
        <v>-2.82904522561023</v>
      </c>
      <c r="AQ2" s="6">
        <v>-4.64617347681997</v>
      </c>
      <c r="AR2" s="6">
        <v>1.45563584125807</v>
      </c>
      <c r="AS2" s="6">
        <v>-2.72133390368185</v>
      </c>
      <c r="AT2" s="6">
        <v>-3.57830439089071</v>
      </c>
      <c r="AU2" s="6">
        <v>-1.54172410273964</v>
      </c>
      <c r="AV2" s="6">
        <v>0.534457904985288</v>
      </c>
      <c r="AW2" s="6">
        <v>0.73007693855044</v>
      </c>
      <c r="AX2" s="6">
        <v>0.646143889716143</v>
      </c>
      <c r="AY2" s="6">
        <v>1.0337834563037</v>
      </c>
      <c r="AZ2" s="6">
        <v>0.519451361991173</v>
      </c>
      <c r="BA2" s="6">
        <v>0.717632894074996</v>
      </c>
      <c r="BB2" s="6">
        <v>0.948115273447002</v>
      </c>
      <c r="BC2" s="6">
        <v>2.29499569779273</v>
      </c>
      <c r="BD2" s="6">
        <v>-0.47737456430275</v>
      </c>
      <c r="BE2" s="6">
        <v>2.80237356292508</v>
      </c>
      <c r="BF2" s="6">
        <v>4.78955957101977</v>
      </c>
      <c r="BG2" s="6">
        <v>0.708475862134946</v>
      </c>
      <c r="BH2" s="6">
        <v>0.792331751770632</v>
      </c>
      <c r="BI2" s="6">
        <v>-0.0431033281985833</v>
      </c>
      <c r="BJ2" s="6">
        <v>0.549550047946127</v>
      </c>
      <c r="BK2" s="6">
        <v>1.98384160195519</v>
      </c>
      <c r="BL2" s="6">
        <v>0.448996353179268</v>
      </c>
      <c r="BM2" s="6">
        <v>1.14344592210773</v>
      </c>
      <c r="BN2" s="6">
        <v>2.48086006501205</v>
      </c>
      <c r="BO2" s="6">
        <v>1.54245049683914</v>
      </c>
      <c r="BP2" s="6">
        <v>3.5813867168963</v>
      </c>
      <c r="BQ2" s="6">
        <v>2.52756568897371</v>
      </c>
      <c r="BR2" s="6">
        <v>0.17440992319024</v>
      </c>
      <c r="BS2" s="6">
        <v>4.98402285831014</v>
      </c>
      <c r="BT2" s="6">
        <v>0.548348173647753</v>
      </c>
      <c r="BU2" s="6">
        <v>0.288243734728383</v>
      </c>
      <c r="BV2" s="6">
        <v>0.50713610300528</v>
      </c>
      <c r="BW2" s="6">
        <v>1.28404197812449</v>
      </c>
      <c r="BX2" s="6">
        <v>3.02979904590188</v>
      </c>
      <c r="BY2" s="6">
        <v>0.0701546863901967</v>
      </c>
      <c r="BZ2" s="6">
        <v>-0.560635376553932</v>
      </c>
      <c r="CA2" s="6">
        <v>0.394889098612907</v>
      </c>
      <c r="CB2" s="6">
        <v>0.313253681661649</v>
      </c>
      <c r="CC2" s="6">
        <v>-0.437188170382626</v>
      </c>
      <c r="CD2" s="6">
        <v>0.341103249696403</v>
      </c>
      <c r="CE2" s="6">
        <v>4.0182655563558</v>
      </c>
      <c r="CF2" s="6">
        <v>0.735275355357601</v>
      </c>
      <c r="CG2" s="6">
        <v>0.51411223073967</v>
      </c>
      <c r="CH2" s="6">
        <v>0.451300027596176</v>
      </c>
      <c r="CI2" s="6">
        <v>1.81325688666141</v>
      </c>
      <c r="CJ2" s="6">
        <v>0.278308501030438</v>
      </c>
      <c r="CK2" s="6">
        <v>0.964002010401714</v>
      </c>
      <c r="CL2" s="6">
        <v>3.53961928385388</v>
      </c>
      <c r="CM2" s="6">
        <v>4.3036884982946</v>
      </c>
      <c r="CN2" s="6">
        <v>20.3047032860445</v>
      </c>
      <c r="CO2" s="6">
        <v>-0.557864313919424</v>
      </c>
      <c r="CP2" s="6">
        <v>2.56872587387767</v>
      </c>
      <c r="CQ2" s="6">
        <v>1.41775126417252</v>
      </c>
      <c r="CR2" s="6">
        <v>0.217271183165053</v>
      </c>
      <c r="CS2" s="6">
        <v>0.960102118763928</v>
      </c>
      <c r="CT2" s="6">
        <v>0.858320552268594</v>
      </c>
    </row>
    <row r="3" spans="2:98" ht="15" customHeight="true">
      <c r="B3" s="6">
        <v>65.5</v>
      </c>
      <c r="C3" s="6">
        <v>-12.4592573184406</v>
      </c>
      <c r="D3" s="6">
        <v>-6.73346168990736</v>
      </c>
      <c r="E3" s="6">
        <v>-5.49177311322592</v>
      </c>
      <c r="F3" s="6">
        <v>-2.45809542182246</v>
      </c>
      <c r="G3" s="6">
        <v>-13.7895793802506</v>
      </c>
      <c r="H3" s="6">
        <v>-8.02201143078219</v>
      </c>
      <c r="I3" s="6">
        <v>-6.48926947612949</v>
      </c>
      <c r="J3" s="6">
        <v>-13.1446435389369</v>
      </c>
      <c r="K3" s="6">
        <v>-11.1936241480346</v>
      </c>
      <c r="L3" s="6">
        <v>1.91731212795594</v>
      </c>
      <c r="M3" s="6">
        <v>1.17769833378418</v>
      </c>
      <c r="N3" s="6">
        <v>0.697684097021295</v>
      </c>
      <c r="O3" s="6">
        <v>-7.83598437723651</v>
      </c>
      <c r="P3" s="6">
        <v>-8.55647222784034</v>
      </c>
      <c r="Q3" s="6">
        <v>-8.57632107571862</v>
      </c>
      <c r="R3" s="6">
        <v>-3.43624256873795</v>
      </c>
      <c r="S3" s="6">
        <v>-4.18268398768214</v>
      </c>
      <c r="T3" s="6">
        <v>-5.88732784335548</v>
      </c>
      <c r="U3" s="6">
        <v>-4.63876844785261</v>
      </c>
      <c r="V3" s="6">
        <v>-0.782377696193862</v>
      </c>
      <c r="W3" s="6">
        <v>-9.15500898914729</v>
      </c>
      <c r="X3" s="6">
        <v>0.903705243222305</v>
      </c>
      <c r="Y3" s="6">
        <v>2.13017303507451</v>
      </c>
      <c r="Z3" s="6">
        <v>0.130131322809348</v>
      </c>
      <c r="AA3" s="6">
        <v>-9.24790281661808</v>
      </c>
      <c r="AB3" s="6">
        <v>-14.1977189383005</v>
      </c>
      <c r="AC3" s="6">
        <v>-11.3451670361044</v>
      </c>
      <c r="AD3" s="6">
        <v>-7.43488595880785</v>
      </c>
      <c r="AE3" s="6">
        <v>-11.2857654555232</v>
      </c>
      <c r="AF3" s="6">
        <v>-9.95267797041288</v>
      </c>
      <c r="AG3" s="6">
        <v>-18.2838882897532</v>
      </c>
      <c r="AH3" s="6">
        <v>-5.84879157787338</v>
      </c>
      <c r="AI3" s="6">
        <v>-7.8737454857793</v>
      </c>
      <c r="AJ3" s="6">
        <v>1.47213940314384</v>
      </c>
      <c r="AK3" s="6">
        <v>0.462840786937534</v>
      </c>
      <c r="AL3" s="6">
        <v>0.368996511264072</v>
      </c>
      <c r="AM3" s="6">
        <v>-11.065105467768</v>
      </c>
      <c r="AN3" s="6">
        <v>-13.0171553791365</v>
      </c>
      <c r="AO3" s="6">
        <v>-0.436097113199935</v>
      </c>
      <c r="AP3" s="6">
        <v>-6.12959798882139</v>
      </c>
      <c r="AQ3" s="6">
        <v>-10.0667091997766</v>
      </c>
      <c r="AR3" s="6">
        <v>3.15387765605942</v>
      </c>
      <c r="AS3" s="6">
        <v>-5.89622345797761</v>
      </c>
      <c r="AT3" s="6">
        <v>-7.7529928469304</v>
      </c>
      <c r="AU3" s="6">
        <v>-3.34040222260228</v>
      </c>
      <c r="AV3" s="6">
        <v>1.15799212746799</v>
      </c>
      <c r="AW3" s="6">
        <v>1.58183336685863</v>
      </c>
      <c r="AX3" s="6">
        <v>1.39997842771851</v>
      </c>
      <c r="AY3" s="6">
        <v>2.23986415532454</v>
      </c>
      <c r="AZ3" s="6">
        <v>1.12547795098021</v>
      </c>
      <c r="BA3" s="6">
        <v>1.55487127049582</v>
      </c>
      <c r="BB3" s="6">
        <v>2.0542497591349</v>
      </c>
      <c r="BC3" s="6">
        <v>4.97249067855091</v>
      </c>
      <c r="BD3" s="6">
        <v>-1.03431155598889</v>
      </c>
      <c r="BE3" s="6">
        <v>6.0718093863382</v>
      </c>
      <c r="BF3" s="6">
        <v>10.3773790705428</v>
      </c>
      <c r="BG3" s="6">
        <v>1.53503103462572</v>
      </c>
      <c r="BH3" s="6">
        <v>1.71671879550342</v>
      </c>
      <c r="BI3" s="6">
        <v>-0.0933905444309176</v>
      </c>
      <c r="BJ3" s="6">
        <v>1.19069177054968</v>
      </c>
      <c r="BK3" s="6">
        <v>4.29832347090382</v>
      </c>
      <c r="BL3" s="6">
        <v>0.972825431887372</v>
      </c>
      <c r="BM3" s="6">
        <v>2.47746616456675</v>
      </c>
      <c r="BN3" s="6">
        <v>5.37519680752507</v>
      </c>
      <c r="BO3" s="6">
        <v>3.34197607648559</v>
      </c>
      <c r="BP3" s="6">
        <v>7.75967121994199</v>
      </c>
      <c r="BQ3" s="6">
        <v>5.47639232610931</v>
      </c>
      <c r="BR3" s="6">
        <v>0.377888166911987</v>
      </c>
      <c r="BS3" s="6">
        <v>10.7987161930053</v>
      </c>
      <c r="BT3" s="6">
        <v>1.1880877095702</v>
      </c>
      <c r="BU3" s="6">
        <v>0.624528091911884</v>
      </c>
      <c r="BV3" s="6">
        <v>1.09879488984478</v>
      </c>
      <c r="BW3" s="6">
        <v>2.7820909526032</v>
      </c>
      <c r="BX3" s="6">
        <v>6.56456459945434</v>
      </c>
      <c r="BY3" s="6">
        <v>0.152001820512623</v>
      </c>
      <c r="BZ3" s="6">
        <v>-1.21470998253392</v>
      </c>
      <c r="CA3" s="6">
        <v>0.855593046993704</v>
      </c>
      <c r="CB3" s="6">
        <v>0.678716310267305</v>
      </c>
      <c r="CC3" s="6">
        <v>-0.947241035829222</v>
      </c>
      <c r="CD3" s="6">
        <v>0.739057041008152</v>
      </c>
      <c r="CE3" s="6">
        <v>8.70624203877122</v>
      </c>
      <c r="CF3" s="6">
        <v>1.593096603275</v>
      </c>
      <c r="CG3" s="6">
        <v>1.11390983326902</v>
      </c>
      <c r="CH3" s="6">
        <v>0.977816726458912</v>
      </c>
      <c r="CI3" s="6">
        <v>3.92872325443329</v>
      </c>
      <c r="CJ3" s="6">
        <v>0.603001752233013</v>
      </c>
      <c r="CK3" s="6">
        <v>2.08867102253691</v>
      </c>
      <c r="CL3" s="6">
        <v>7.66917511501595</v>
      </c>
      <c r="CM3" s="6">
        <v>9.32465841297085</v>
      </c>
      <c r="CN3" s="6">
        <v>43.99352378643</v>
      </c>
      <c r="CO3" s="6">
        <v>-1.20870601349202</v>
      </c>
      <c r="CP3" s="6">
        <v>5.56557272673456</v>
      </c>
      <c r="CQ3" s="6">
        <v>3.07179440570661</v>
      </c>
      <c r="CR3" s="6">
        <v>0.470754230190096</v>
      </c>
      <c r="CS3" s="6">
        <v>2.08022125732185</v>
      </c>
      <c r="CT3" s="6">
        <v>1.85969452991554</v>
      </c>
    </row>
    <row r="4" spans="2:98" ht="15" customHeight="true">
      <c r="B4" s="6">
        <v>66</v>
      </c>
      <c r="C4" s="6">
        <v>-11.5008529093305</v>
      </c>
      <c r="D4" s="6">
        <v>-6.21550309837505</v>
      </c>
      <c r="E4" s="6">
        <v>-5.0693290275932</v>
      </c>
      <c r="F4" s="6">
        <v>-2.26901115860437</v>
      </c>
      <c r="G4" s="6">
        <v>-12.7288425048458</v>
      </c>
      <c r="H4" s="6">
        <v>-7.40493362841437</v>
      </c>
      <c r="I4" s="6">
        <v>-5.99009490104163</v>
      </c>
      <c r="J4" s="6">
        <v>-12.1335171128666</v>
      </c>
      <c r="K4" s="6">
        <v>-10.3325761366473</v>
      </c>
      <c r="L4" s="6">
        <v>1.76982657965164</v>
      </c>
      <c r="M4" s="6">
        <v>1.08710615426236</v>
      </c>
      <c r="N4" s="6">
        <v>0.644016089557624</v>
      </c>
      <c r="O4" s="6">
        <v>-7.23321634821741</v>
      </c>
      <c r="P4" s="6">
        <v>-7.89828205646802</v>
      </c>
      <c r="Q4" s="6">
        <v>-7.91660406989502</v>
      </c>
      <c r="R4" s="6">
        <v>-3.1719162172966</v>
      </c>
      <c r="S4" s="6">
        <v>-3.86093906555186</v>
      </c>
      <c r="T4" s="6">
        <v>-5.43445647078966</v>
      </c>
      <c r="U4" s="6">
        <v>-4.28194010571019</v>
      </c>
      <c r="V4" s="6">
        <v>-0.722194796485724</v>
      </c>
      <c r="W4" s="6">
        <v>-8.45077752844452</v>
      </c>
      <c r="X4" s="6">
        <v>0.834189455282114</v>
      </c>
      <c r="Y4" s="6">
        <v>1.96631357083754</v>
      </c>
      <c r="Z4" s="6">
        <v>0.120121221054376</v>
      </c>
      <c r="AA4" s="6">
        <v>-8.53652567687823</v>
      </c>
      <c r="AB4" s="6">
        <v>-13.1055867122782</v>
      </c>
      <c r="AC4" s="6">
        <v>-10.472461879481</v>
      </c>
      <c r="AD4" s="6">
        <v>-6.86297165428425</v>
      </c>
      <c r="AE4" s="6">
        <v>-10.4176296512513</v>
      </c>
      <c r="AF4" s="6">
        <v>-9.18708735730331</v>
      </c>
      <c r="AG4" s="6">
        <v>-16.8774353443877</v>
      </c>
      <c r="AH4" s="6">
        <v>-5.39888453342257</v>
      </c>
      <c r="AI4" s="6">
        <v>-7.26807275610315</v>
      </c>
      <c r="AJ4" s="6">
        <v>1.35889791059429</v>
      </c>
      <c r="AK4" s="6">
        <v>0.427237649480787</v>
      </c>
      <c r="AL4" s="6">
        <v>0.340612164243794</v>
      </c>
      <c r="AM4" s="6">
        <v>-10.2139435087089</v>
      </c>
      <c r="AN4" s="6">
        <v>-12.0158357345884</v>
      </c>
      <c r="AO4" s="6">
        <v>-0.402551181415333</v>
      </c>
      <c r="AP4" s="6">
        <v>-5.65809045121966</v>
      </c>
      <c r="AQ4" s="6">
        <v>-9.29234695363994</v>
      </c>
      <c r="AR4" s="6">
        <v>2.91127168251637</v>
      </c>
      <c r="AS4" s="6">
        <v>-5.44266780736393</v>
      </c>
      <c r="AT4" s="6">
        <v>-7.15660878178289</v>
      </c>
      <c r="AU4" s="6">
        <v>-3.08344820547904</v>
      </c>
      <c r="AV4" s="6">
        <v>1.06891580997046</v>
      </c>
      <c r="AW4" s="6">
        <v>1.46015387710025</v>
      </c>
      <c r="AX4" s="6">
        <v>1.29228777943246</v>
      </c>
      <c r="AY4" s="6">
        <v>2.06756691260637</v>
      </c>
      <c r="AZ4" s="6">
        <v>1.03890272397996</v>
      </c>
      <c r="BA4" s="6">
        <v>1.43526578814999</v>
      </c>
      <c r="BB4" s="6">
        <v>1.89623054689469</v>
      </c>
      <c r="BC4" s="6">
        <v>4.58999139558546</v>
      </c>
      <c r="BD4" s="6">
        <v>-0.954749128605158</v>
      </c>
      <c r="BE4" s="6">
        <v>5.60474712585108</v>
      </c>
      <c r="BF4" s="6">
        <v>9.57911914203947</v>
      </c>
      <c r="BG4" s="6">
        <v>1.41695172426989</v>
      </c>
      <c r="BH4" s="6">
        <v>1.58466350354161</v>
      </c>
      <c r="BI4" s="6">
        <v>-0.0862066563977919</v>
      </c>
      <c r="BJ4" s="6">
        <v>1.09910009589157</v>
      </c>
      <c r="BK4" s="6">
        <v>3.96768320391209</v>
      </c>
      <c r="BL4" s="6">
        <v>0.897992706356718</v>
      </c>
      <c r="BM4" s="6">
        <v>2.28689184421546</v>
      </c>
      <c r="BN4" s="6">
        <v>4.9617201300232</v>
      </c>
      <c r="BO4" s="6">
        <v>3.08490099367987</v>
      </c>
      <c r="BP4" s="6">
        <v>7.16277343379261</v>
      </c>
      <c r="BQ4" s="6">
        <v>5.05513137794662</v>
      </c>
      <c r="BR4" s="6">
        <v>0.348819846380309</v>
      </c>
      <c r="BS4" s="6">
        <v>9.96804571662068</v>
      </c>
      <c r="BT4" s="6">
        <v>1.09669634729556</v>
      </c>
      <c r="BU4" s="6">
        <v>0.576487469457163</v>
      </c>
      <c r="BV4" s="6">
        <v>1.01427220601101</v>
      </c>
      <c r="BW4" s="6">
        <v>2.5680839562491</v>
      </c>
      <c r="BX4" s="6">
        <v>6.05959809180399</v>
      </c>
      <c r="BY4" s="6">
        <v>0.140309372780848</v>
      </c>
      <c r="BZ4" s="6">
        <v>-1.12127075310821</v>
      </c>
      <c r="CA4" s="6">
        <v>0.789778197224905</v>
      </c>
      <c r="CB4" s="6">
        <v>0.62650736332364</v>
      </c>
      <c r="CC4" s="6">
        <v>-0.874376340765423</v>
      </c>
      <c r="CD4" s="6">
        <v>0.682206499392123</v>
      </c>
      <c r="CE4" s="6">
        <v>8.03653111271188</v>
      </c>
      <c r="CF4" s="6">
        <v>1.47055071071537</v>
      </c>
      <c r="CG4" s="6">
        <v>1.0282244614786</v>
      </c>
      <c r="CH4" s="6">
        <v>0.902600055193261</v>
      </c>
      <c r="CI4" s="6">
        <v>3.62651377332213</v>
      </c>
      <c r="CJ4" s="6">
        <v>0.556617002062126</v>
      </c>
      <c r="CK4" s="6">
        <v>1.92800402080331</v>
      </c>
      <c r="CL4" s="6">
        <v>7.07923856770606</v>
      </c>
      <c r="CM4" s="6">
        <v>8.60737699658841</v>
      </c>
      <c r="CN4" s="6">
        <v>40.6094065720901</v>
      </c>
      <c r="CO4" s="6">
        <v>-1.11572862783839</v>
      </c>
      <c r="CP4" s="6">
        <v>5.13745174775499</v>
      </c>
      <c r="CQ4" s="6">
        <v>2.83550252834414</v>
      </c>
      <c r="CR4" s="6">
        <v>0.434542366328912</v>
      </c>
      <c r="CS4" s="6">
        <v>1.92020423752831</v>
      </c>
      <c r="CT4" s="6">
        <v>1.71664110453696</v>
      </c>
    </row>
    <row r="5" spans="2:98" ht="15" customHeight="true">
      <c r="B5" s="6">
        <v>66.5</v>
      </c>
      <c r="C5" s="6">
        <v>-11.5008529093302</v>
      </c>
      <c r="D5" s="6">
        <v>-6.21550309837301</v>
      </c>
      <c r="E5" s="6">
        <v>-5.0693290275974</v>
      </c>
      <c r="F5" s="6">
        <v>-2.26901115859994</v>
      </c>
      <c r="G5" s="6">
        <v>-12.7288425048492</v>
      </c>
      <c r="H5" s="6">
        <v>-7.40493362841255</v>
      </c>
      <c r="I5" s="6">
        <v>-5.9900949010439</v>
      </c>
      <c r="J5" s="6">
        <v>-12.1335171128619</v>
      </c>
      <c r="K5" s="6">
        <v>-10.3325761366411</v>
      </c>
      <c r="L5" s="6">
        <v>1.7698265796592</v>
      </c>
      <c r="M5" s="6">
        <v>1.087106154266</v>
      </c>
      <c r="N5" s="6">
        <v>0.644016089550576</v>
      </c>
      <c r="O5" s="6">
        <v>-7.23321634821616</v>
      </c>
      <c r="P5" s="6">
        <v>-7.89828205646688</v>
      </c>
      <c r="Q5" s="6">
        <v>-7.91660406989274</v>
      </c>
      <c r="R5" s="6">
        <v>-3.17191621730296</v>
      </c>
      <c r="S5" s="6">
        <v>-3.86093906555197</v>
      </c>
      <c r="T5" s="6">
        <v>-5.43445647079557</v>
      </c>
      <c r="U5" s="6">
        <v>-4.28194010571212</v>
      </c>
      <c r="V5" s="6">
        <v>-0.722194796491522</v>
      </c>
      <c r="W5" s="6">
        <v>-8.45077752844941</v>
      </c>
      <c r="X5" s="6">
        <v>0.834189455276885</v>
      </c>
      <c r="Y5" s="6">
        <v>1.96631357083851</v>
      </c>
      <c r="Z5" s="6">
        <v>0.12012122105773</v>
      </c>
      <c r="AA5" s="6">
        <v>-8.53652567687675</v>
      </c>
      <c r="AB5" s="6">
        <v>-13.1055867122784</v>
      </c>
      <c r="AC5" s="6">
        <v>-10.4724618794719</v>
      </c>
      <c r="AD5" s="6">
        <v>-6.86297165428755</v>
      </c>
      <c r="AE5" s="6">
        <v>-10.4176296512469</v>
      </c>
      <c r="AF5" s="6">
        <v>-9.18708735731172</v>
      </c>
      <c r="AG5" s="6">
        <v>-16.8774353443924</v>
      </c>
      <c r="AH5" s="6">
        <v>-5.39888453341598</v>
      </c>
      <c r="AI5" s="6">
        <v>-7.26807275610349</v>
      </c>
      <c r="AJ5" s="6">
        <v>1.35889791060237</v>
      </c>
      <c r="AK5" s="6">
        <v>0.42723764948397</v>
      </c>
      <c r="AL5" s="6">
        <v>0.340612164248455</v>
      </c>
      <c r="AM5" s="6">
        <v>-10.2139435087099</v>
      </c>
      <c r="AN5" s="6">
        <v>-12.0158357345894</v>
      </c>
      <c r="AO5" s="6">
        <v>-0.402551181410786</v>
      </c>
      <c r="AP5" s="6">
        <v>-5.65809045121955</v>
      </c>
      <c r="AQ5" s="6">
        <v>-9.29234695363902</v>
      </c>
      <c r="AR5" s="6">
        <v>2.91127168251956</v>
      </c>
      <c r="AS5" s="6">
        <v>-5.44266780735643</v>
      </c>
      <c r="AT5" s="6">
        <v>-7.15660878177698</v>
      </c>
      <c r="AU5" s="6">
        <v>-3.08344820547722</v>
      </c>
      <c r="AV5" s="6">
        <v>1.06891580997575</v>
      </c>
      <c r="AW5" s="6">
        <v>1.4601538771052</v>
      </c>
      <c r="AX5" s="6">
        <v>1.29228777943314</v>
      </c>
      <c r="AY5" s="6">
        <v>2.06756691261035</v>
      </c>
      <c r="AZ5" s="6">
        <v>1.03890272398849</v>
      </c>
      <c r="BA5" s="6">
        <v>1.43526578815079</v>
      </c>
      <c r="BB5" s="6">
        <v>1.89623054689036</v>
      </c>
      <c r="BC5" s="6">
        <v>4.58999139558568</v>
      </c>
      <c r="BD5" s="6">
        <v>-0.95474912860891</v>
      </c>
      <c r="BE5" s="6">
        <v>5.60474712584767</v>
      </c>
      <c r="BF5" s="6">
        <v>9.5791191420401</v>
      </c>
      <c r="BG5" s="6">
        <v>1.41695172426489</v>
      </c>
      <c r="BH5" s="6">
        <v>1.58466350353876</v>
      </c>
      <c r="BI5" s="6">
        <v>-0.0862066564009751</v>
      </c>
      <c r="BJ5" s="6">
        <v>1.09910009589646</v>
      </c>
      <c r="BK5" s="6">
        <v>3.96768320391232</v>
      </c>
      <c r="BL5" s="6">
        <v>0.897992706356263</v>
      </c>
      <c r="BM5" s="6">
        <v>2.2868918442125</v>
      </c>
      <c r="BN5" s="6">
        <v>4.9617201300216</v>
      </c>
      <c r="BO5" s="6">
        <v>3.08490099367702</v>
      </c>
      <c r="BP5" s="6">
        <v>7.16277343379272</v>
      </c>
      <c r="BQ5" s="6">
        <v>5.05513137793918</v>
      </c>
      <c r="BR5" s="6">
        <v>0.348819846388949</v>
      </c>
      <c r="BS5" s="6">
        <v>9.96804571662386</v>
      </c>
      <c r="BT5" s="6">
        <v>1.09669634729943</v>
      </c>
      <c r="BU5" s="6">
        <v>0.57648746945199</v>
      </c>
      <c r="BV5" s="6">
        <v>1.01427220601261</v>
      </c>
      <c r="BW5" s="6">
        <v>2.5680839562466</v>
      </c>
      <c r="BX5" s="6">
        <v>6.05959809180229</v>
      </c>
      <c r="BY5" s="6">
        <v>0.140309372784941</v>
      </c>
      <c r="BZ5" s="6">
        <v>-1.12127075311332</v>
      </c>
      <c r="CA5" s="6">
        <v>0.789778197231612</v>
      </c>
      <c r="CB5" s="6">
        <v>0.626507363324094</v>
      </c>
      <c r="CC5" s="6">
        <v>-0.874376340764968</v>
      </c>
      <c r="CD5" s="6">
        <v>0.682206499398774</v>
      </c>
      <c r="CE5" s="6">
        <v>8.03653111270825</v>
      </c>
      <c r="CF5" s="6">
        <v>1.4705507107206</v>
      </c>
      <c r="CG5" s="6">
        <v>1.02822446148332</v>
      </c>
      <c r="CH5" s="6">
        <v>0.90260005518769</v>
      </c>
      <c r="CI5" s="6">
        <v>3.62651377332327</v>
      </c>
      <c r="CJ5" s="6">
        <v>0.556617002055532</v>
      </c>
      <c r="CK5" s="6">
        <v>1.92800402080536</v>
      </c>
      <c r="CL5" s="6">
        <v>7.07923856771197</v>
      </c>
      <c r="CM5" s="6">
        <v>8.60737699659364</v>
      </c>
      <c r="CN5" s="6">
        <v>40.6094065720832</v>
      </c>
      <c r="CO5" s="6">
        <v>-1.11572862783322</v>
      </c>
      <c r="CP5" s="6">
        <v>5.13745174774965</v>
      </c>
      <c r="CQ5" s="6">
        <v>2.8355025283484</v>
      </c>
      <c r="CR5" s="6">
        <v>0.434542366323058</v>
      </c>
      <c r="CS5" s="6">
        <v>1.92020423752575</v>
      </c>
      <c r="CT5" s="6">
        <v>1.71664110453816</v>
      </c>
    </row>
    <row r="6" spans="2:98" ht="15" customHeight="true">
      <c r="B6" s="6">
        <v>67</v>
      </c>
      <c r="C6" s="6">
        <v>-11.500852909331</v>
      </c>
      <c r="D6" s="6">
        <v>-6.21550309839927</v>
      </c>
      <c r="E6" s="6">
        <v>-5.06932902756068</v>
      </c>
      <c r="F6" s="6">
        <v>-2.26901115864575</v>
      </c>
      <c r="G6" s="6">
        <v>-12.7288425048271</v>
      </c>
      <c r="H6" s="6">
        <v>-7.40493362842085</v>
      </c>
      <c r="I6" s="6">
        <v>-5.99009490103924</v>
      </c>
      <c r="J6" s="6">
        <v>-12.133517112892</v>
      </c>
      <c r="K6" s="6">
        <v>-10.3325761366923</v>
      </c>
      <c r="L6" s="6">
        <v>1.76982657959826</v>
      </c>
      <c r="M6" s="6">
        <v>1.08710615423109</v>
      </c>
      <c r="N6" s="6">
        <v>0.644016089612137</v>
      </c>
      <c r="O6" s="6">
        <v>-7.2332163482298</v>
      </c>
      <c r="P6" s="6">
        <v>-7.89828205647712</v>
      </c>
      <c r="Q6" s="6">
        <v>-7.91660406991218</v>
      </c>
      <c r="R6" s="6">
        <v>-3.17191621725522</v>
      </c>
      <c r="S6" s="6">
        <v>-3.86093906555106</v>
      </c>
      <c r="T6" s="6">
        <v>-5.43445647074827</v>
      </c>
      <c r="U6" s="6">
        <v>-4.28194010568507</v>
      </c>
      <c r="V6" s="6">
        <v>-0.722194796450367</v>
      </c>
      <c r="W6" s="6">
        <v>-8.4507775284136</v>
      </c>
      <c r="X6" s="6">
        <v>0.834189455320313</v>
      </c>
      <c r="Y6" s="6">
        <v>1.96631357083339</v>
      </c>
      <c r="Z6" s="6">
        <v>0.120121221032377</v>
      </c>
      <c r="AA6" s="6">
        <v>-8.53652567688766</v>
      </c>
      <c r="AB6" s="6">
        <v>-13.1055867122673</v>
      </c>
      <c r="AC6" s="6">
        <v>-10.4724618795415</v>
      </c>
      <c r="AD6" s="6">
        <v>-6.86297165425287</v>
      </c>
      <c r="AE6" s="6">
        <v>-10.4176296512926</v>
      </c>
      <c r="AF6" s="6">
        <v>-9.18708735725704</v>
      </c>
      <c r="AG6" s="6">
        <v>-16.8774353443576</v>
      </c>
      <c r="AH6" s="6">
        <v>-5.39888453346043</v>
      </c>
      <c r="AI6" s="6">
        <v>-7.2680727561027</v>
      </c>
      <c r="AJ6" s="6">
        <v>1.35889791054149</v>
      </c>
      <c r="AK6" s="6">
        <v>0.427237649458505</v>
      </c>
      <c r="AL6" s="6">
        <v>0.340612164212871</v>
      </c>
      <c r="AM6" s="6">
        <v>-10.213943508708</v>
      </c>
      <c r="AN6" s="6">
        <v>-12.01583573458</v>
      </c>
      <c r="AO6" s="6">
        <v>-0.402551181449212</v>
      </c>
      <c r="AP6" s="6">
        <v>-5.65809045122671</v>
      </c>
      <c r="AQ6" s="6">
        <v>-9.29234695364619</v>
      </c>
      <c r="AR6" s="6">
        <v>2.91127168249636</v>
      </c>
      <c r="AS6" s="6">
        <v>-5.4426678074226</v>
      </c>
      <c r="AT6" s="6">
        <v>-7.15660878181609</v>
      </c>
      <c r="AU6" s="6">
        <v>-3.08344820549291</v>
      </c>
      <c r="AV6" s="6">
        <v>1.06891580993346</v>
      </c>
      <c r="AW6" s="6">
        <v>1.46015387706774</v>
      </c>
      <c r="AX6" s="6">
        <v>1.29228777942927</v>
      </c>
      <c r="AY6" s="6">
        <v>2.06756691257726</v>
      </c>
      <c r="AZ6" s="6">
        <v>1.03890272392744</v>
      </c>
      <c r="BA6" s="6">
        <v>1.43526578814533</v>
      </c>
      <c r="BB6" s="6">
        <v>1.89623054692208</v>
      </c>
      <c r="BC6" s="6">
        <v>4.58999139558705</v>
      </c>
      <c r="BD6" s="6">
        <v>-0.954749128575713</v>
      </c>
      <c r="BE6" s="6">
        <v>5.60474712587182</v>
      </c>
      <c r="BF6" s="6">
        <v>9.5791191420351</v>
      </c>
      <c r="BG6" s="6">
        <v>1.41695172430491</v>
      </c>
      <c r="BH6" s="6">
        <v>1.58466350355934</v>
      </c>
      <c r="BI6" s="6">
        <v>-0.0862066563717576</v>
      </c>
      <c r="BJ6" s="6">
        <v>1.09910009586048</v>
      </c>
      <c r="BK6" s="6">
        <v>3.96768320390106</v>
      </c>
      <c r="BL6" s="6">
        <v>0.897992706366154</v>
      </c>
      <c r="BM6" s="6">
        <v>2.28689184423911</v>
      </c>
      <c r="BN6" s="6">
        <v>4.96172013004298</v>
      </c>
      <c r="BO6" s="6">
        <v>3.08490099369078</v>
      </c>
      <c r="BP6" s="6">
        <v>7.16277343379181</v>
      </c>
      <c r="BQ6" s="6">
        <v>5.05513137800301</v>
      </c>
      <c r="BR6" s="6">
        <v>0.348819846319827</v>
      </c>
      <c r="BS6" s="6">
        <v>9.96804571659743</v>
      </c>
      <c r="BT6" s="6">
        <v>1.0966963472701</v>
      </c>
      <c r="BU6" s="6">
        <v>0.576487469489223</v>
      </c>
      <c r="BV6" s="6">
        <v>1.01427220599891</v>
      </c>
      <c r="BW6" s="6">
        <v>2.56808395626774</v>
      </c>
      <c r="BX6" s="6">
        <v>6.05959809181593</v>
      </c>
      <c r="BY6" s="6">
        <v>0.140309372757429</v>
      </c>
      <c r="BZ6" s="6">
        <v>-1.1212707530733</v>
      </c>
      <c r="CA6" s="6">
        <v>0.789778197183409</v>
      </c>
      <c r="CB6" s="6">
        <v>0.62650736332364</v>
      </c>
      <c r="CC6" s="6">
        <v>-0.874376340768606</v>
      </c>
      <c r="CD6" s="6">
        <v>0.682206499347274</v>
      </c>
      <c r="CE6" s="6">
        <v>8.03653111273161</v>
      </c>
      <c r="CF6" s="6">
        <v>1.47055071067876</v>
      </c>
      <c r="CG6" s="6">
        <v>1.02822446145075</v>
      </c>
      <c r="CH6" s="6">
        <v>0.902600055227992</v>
      </c>
      <c r="CI6" s="6">
        <v>3.62651377331531</v>
      </c>
      <c r="CJ6" s="6">
        <v>0.556617002111466</v>
      </c>
      <c r="CK6" s="6">
        <v>1.92800402078899</v>
      </c>
      <c r="CL6" s="6">
        <v>7.07923856767456</v>
      </c>
      <c r="CM6" s="6">
        <v>8.60737699655806</v>
      </c>
      <c r="CN6" s="6">
        <v>40.6094065721394</v>
      </c>
      <c r="CO6" s="6">
        <v>-1.11572862787557</v>
      </c>
      <c r="CP6" s="6">
        <v>5.13745174779609</v>
      </c>
      <c r="CQ6" s="6">
        <v>2.83550252831736</v>
      </c>
      <c r="CR6" s="6">
        <v>0.434542366370977</v>
      </c>
      <c r="CS6" s="6">
        <v>1.92020423754519</v>
      </c>
      <c r="CT6" s="6">
        <v>1.71664110452963</v>
      </c>
    </row>
    <row r="7" spans="2:98" ht="15" customHeight="true">
      <c r="B7" s="6">
        <v>67.5</v>
      </c>
      <c r="C7" s="6">
        <v>-11.9125009984382</v>
      </c>
      <c r="D7" s="6">
        <v>-6.23641128271004</v>
      </c>
      <c r="E7" s="6">
        <v>-5.80333003432372</v>
      </c>
      <c r="F7" s="6">
        <v>-2.37267065450453</v>
      </c>
      <c r="G7" s="6">
        <v>-13.2084127794312</v>
      </c>
      <c r="H7" s="6">
        <v>-7.36099676920196</v>
      </c>
      <c r="I7" s="6">
        <v>-5.83973962513289</v>
      </c>
      <c r="J7" s="6">
        <v>-12.3769756726696</v>
      </c>
      <c r="K7" s="6">
        <v>-10.3567159557952</v>
      </c>
      <c r="L7" s="6">
        <v>1.81956573283725</v>
      </c>
      <c r="M7" s="6">
        <v>1.07104054792484</v>
      </c>
      <c r="N7" s="6">
        <v>0.601189935117304</v>
      </c>
      <c r="O7" s="6">
        <v>-7.39153372553915</v>
      </c>
      <c r="P7" s="6">
        <v>-8.02810061800983</v>
      </c>
      <c r="Q7" s="6">
        <v>-8.57482176477993</v>
      </c>
      <c r="R7" s="6">
        <v>-3.77705958131867</v>
      </c>
      <c r="S7" s="6">
        <v>-4.57971131368924</v>
      </c>
      <c r="T7" s="6">
        <v>-5.88463020415259</v>
      </c>
      <c r="U7" s="6">
        <v>-4.96626876110542</v>
      </c>
      <c r="V7" s="6">
        <v>-1.18080077728382</v>
      </c>
      <c r="W7" s="6">
        <v>-8.64798527993753</v>
      </c>
      <c r="X7" s="6">
        <v>0.828249627840819</v>
      </c>
      <c r="Y7" s="6">
        <v>1.97253164084179</v>
      </c>
      <c r="Z7" s="6">
        <v>0.153790451003658</v>
      </c>
      <c r="AA7" s="6">
        <v>-8.59827867025536</v>
      </c>
      <c r="AB7" s="6">
        <v>-13.7678754961026</v>
      </c>
      <c r="AC7" s="6">
        <v>-10.5947096477863</v>
      </c>
      <c r="AD7" s="6">
        <v>-7.06290731349134</v>
      </c>
      <c r="AE7" s="6">
        <v>-10.6683723918376</v>
      </c>
      <c r="AF7" s="6">
        <v>-9.94709425984809</v>
      </c>
      <c r="AG7" s="6">
        <v>-16.8064404476851</v>
      </c>
      <c r="AH7" s="6">
        <v>-5.45912691110459</v>
      </c>
      <c r="AI7" s="6">
        <v>-7.40206746670094</v>
      </c>
      <c r="AJ7" s="6">
        <v>1.30881950063269</v>
      </c>
      <c r="AK7" s="6">
        <v>0.377506909811814</v>
      </c>
      <c r="AL7" s="6">
        <v>0.272599758153547</v>
      </c>
      <c r="AM7" s="6">
        <v>-10.3811762103135</v>
      </c>
      <c r="AN7" s="6">
        <v>-12.4455868499188</v>
      </c>
      <c r="AO7" s="6">
        <v>-1.01004236379299</v>
      </c>
      <c r="AP7" s="6">
        <v>-6.44595507908036</v>
      </c>
      <c r="AQ7" s="6">
        <v>-9.38073269089489</v>
      </c>
      <c r="AR7" s="6">
        <v>2.53648397606855</v>
      </c>
      <c r="AS7" s="6">
        <v>-5.74694633392642</v>
      </c>
      <c r="AT7" s="6">
        <v>-7.58343847292281</v>
      </c>
      <c r="AU7" s="6">
        <v>-3.26733308303699</v>
      </c>
      <c r="AV7" s="6">
        <v>1.06656558951164</v>
      </c>
      <c r="AW7" s="6">
        <v>1.42441254004626</v>
      </c>
      <c r="AX7" s="6">
        <v>1.30951090024939</v>
      </c>
      <c r="AY7" s="6">
        <v>1.52584228285662</v>
      </c>
      <c r="AZ7" s="6">
        <v>0.346712381633779</v>
      </c>
      <c r="BA7" s="6">
        <v>0.529722244473646</v>
      </c>
      <c r="BB7" s="6">
        <v>1.02372006452163</v>
      </c>
      <c r="BC7" s="6">
        <v>3.74651219836153</v>
      </c>
      <c r="BD7" s="6">
        <v>-1.52866591291729</v>
      </c>
      <c r="BE7" s="6">
        <v>5.37758044276586</v>
      </c>
      <c r="BF7" s="6">
        <v>9.44687602659036</v>
      </c>
      <c r="BG7" s="6">
        <v>1.38872136789104</v>
      </c>
      <c r="BH7" s="6">
        <v>1.54271595480918</v>
      </c>
      <c r="BI7" s="6">
        <v>-0.0600626256936039</v>
      </c>
      <c r="BJ7" s="6">
        <v>1.12262176981841</v>
      </c>
      <c r="BK7" s="6">
        <v>3.28000851389186</v>
      </c>
      <c r="BL7" s="6">
        <v>0.14367443088247</v>
      </c>
      <c r="BM7" s="6">
        <v>1.51631616676241</v>
      </c>
      <c r="BN7" s="6">
        <v>4.16344670217495</v>
      </c>
      <c r="BO7" s="6">
        <v>2.47641127139389</v>
      </c>
      <c r="BP7" s="6">
        <v>6.3979166074605</v>
      </c>
      <c r="BQ7" s="6">
        <v>5.02760762251313</v>
      </c>
      <c r="BR7" s="6">
        <v>0.417708208492456</v>
      </c>
      <c r="BS7" s="6">
        <v>9.84132545642928</v>
      </c>
      <c r="BT7" s="6">
        <v>1.16558559326705</v>
      </c>
      <c r="BU7" s="6">
        <v>0.58008728421504</v>
      </c>
      <c r="BV7" s="6">
        <v>1.01314505543235</v>
      </c>
      <c r="BW7" s="6">
        <v>2.02680624648258</v>
      </c>
      <c r="BX7" s="6">
        <v>5.29759068954581</v>
      </c>
      <c r="BY7" s="6">
        <v>-0.467171001740553</v>
      </c>
      <c r="BZ7" s="6">
        <v>-1.8491228675756</v>
      </c>
      <c r="CA7" s="6">
        <v>0.150321394821503</v>
      </c>
      <c r="CB7" s="6">
        <v>-0.358678642854329</v>
      </c>
      <c r="CC7" s="6">
        <v>-0.88976693263055</v>
      </c>
      <c r="CD7" s="6">
        <v>0.631943672575346</v>
      </c>
      <c r="CE7" s="6">
        <v>7.9500156497723</v>
      </c>
      <c r="CF7" s="6">
        <v>1.56356765012646</v>
      </c>
      <c r="CG7" s="6">
        <v>1.01450379855345</v>
      </c>
      <c r="CH7" s="6">
        <v>0.910128514128474</v>
      </c>
      <c r="CI7" s="6">
        <v>2.96374139707723</v>
      </c>
      <c r="CJ7" s="6">
        <v>-0.164924978275849</v>
      </c>
      <c r="CK7" s="6">
        <v>1.25971764589133</v>
      </c>
      <c r="CL7" s="6">
        <v>6.19803338303234</v>
      </c>
      <c r="CM7" s="6">
        <v>7.85039432194969</v>
      </c>
      <c r="CN7" s="6">
        <v>40.4089414839118</v>
      </c>
      <c r="CO7" s="6">
        <v>-1.16458316044088</v>
      </c>
      <c r="CP7" s="6">
        <v>5.05232363829162</v>
      </c>
      <c r="CQ7" s="6">
        <v>2.79749353041547</v>
      </c>
      <c r="CR7" s="6">
        <v>0.464629684437682</v>
      </c>
      <c r="CS7" s="6">
        <v>1.99277609287594</v>
      </c>
      <c r="CT7" s="6">
        <v>1.79042453607701</v>
      </c>
    </row>
    <row r="8" spans="2:98" ht="15" customHeight="true">
      <c r="B8" s="6">
        <v>68</v>
      </c>
      <c r="C8" s="6">
        <v>-9.58821875403828</v>
      </c>
      <c r="D8" s="6">
        <v>-6.1129826611525</v>
      </c>
      <c r="E8" s="6">
        <v>-1.49788456206215</v>
      </c>
      <c r="F8" s="6">
        <v>-1.92117136702655</v>
      </c>
      <c r="G8" s="6">
        <v>-10.6475691074547</v>
      </c>
      <c r="H8" s="6">
        <v>-7.87715394359634</v>
      </c>
      <c r="I8" s="6">
        <v>-7.06567395741035</v>
      </c>
      <c r="J8" s="6">
        <v>-11.2912959947981</v>
      </c>
      <c r="K8" s="6">
        <v>-10.4959897240985</v>
      </c>
      <c r="L8" s="6">
        <v>1.4462787093932</v>
      </c>
      <c r="M8" s="6">
        <v>1.15150034842088</v>
      </c>
      <c r="N8" s="6">
        <v>0.857341246848989</v>
      </c>
      <c r="O8" s="6">
        <v>-6.47292593068266</v>
      </c>
      <c r="P8" s="6">
        <v>-7.36432546863864</v>
      </c>
      <c r="Q8" s="6">
        <v>-4.69514539769898</v>
      </c>
      <c r="R8" s="6">
        <v>-0.321960304651498</v>
      </c>
      <c r="S8" s="6">
        <v>-0.48444642646291</v>
      </c>
      <c r="T8" s="6">
        <v>-3.2882905266672</v>
      </c>
      <c r="U8" s="6">
        <v>-1.01359299511751</v>
      </c>
      <c r="V8" s="6">
        <v>1.34707387129697</v>
      </c>
      <c r="W8" s="6">
        <v>-7.7106293312786</v>
      </c>
      <c r="X8" s="6">
        <v>0.894116880612216</v>
      </c>
      <c r="Y8" s="6">
        <v>1.94447863896255</v>
      </c>
      <c r="Z8" s="6">
        <v>-0.09947922605744</v>
      </c>
      <c r="AA8" s="6">
        <v>-8.4006633349187</v>
      </c>
      <c r="AB8" s="6">
        <v>-9.99942747333296</v>
      </c>
      <c r="AC8" s="6">
        <v>-10.2323753111857</v>
      </c>
      <c r="AD8" s="6">
        <v>-6.06634869326706</v>
      </c>
      <c r="AE8" s="6">
        <v>-9.47604911089366</v>
      </c>
      <c r="AF8" s="6">
        <v>-5.62502540903813</v>
      </c>
      <c r="AG8" s="6">
        <v>-17.4998781924741</v>
      </c>
      <c r="AH8" s="6">
        <v>-5.46978730772059</v>
      </c>
      <c r="AI8" s="6">
        <v>-6.84452509368396</v>
      </c>
      <c r="AJ8" s="6">
        <v>1.69756221074118</v>
      </c>
      <c r="AK8" s="6">
        <v>0.813272952327566</v>
      </c>
      <c r="AL8" s="6">
        <v>0.7167586027266</v>
      </c>
      <c r="AM8" s="6">
        <v>-9.62813496401725</v>
      </c>
      <c r="AN8" s="6">
        <v>-9.99784112140208</v>
      </c>
      <c r="AO8" s="6">
        <v>2.4221720979541</v>
      </c>
      <c r="AP8" s="6">
        <v>-1.79686077769611</v>
      </c>
      <c r="AQ8" s="6">
        <v>-9.24176405739911</v>
      </c>
      <c r="AR8" s="6">
        <v>4.47394766221942</v>
      </c>
      <c r="AS8" s="6">
        <v>-4.27676679810554</v>
      </c>
      <c r="AT8" s="6">
        <v>-5.18068325651052</v>
      </c>
      <c r="AU8" s="6">
        <v>-2.31429166849932</v>
      </c>
      <c r="AV8" s="6">
        <v>1.10749153751402</v>
      </c>
      <c r="AW8" s="6">
        <v>1.67389559510036</v>
      </c>
      <c r="AX8" s="6">
        <v>1.16332454376879</v>
      </c>
      <c r="AY8" s="6">
        <v>4.624367362871</v>
      </c>
      <c r="AZ8" s="6">
        <v>4.45051090127947</v>
      </c>
      <c r="BA8" s="6">
        <v>5.9117209599018</v>
      </c>
      <c r="BB8" s="6">
        <v>6.17893265924874</v>
      </c>
      <c r="BC8" s="6">
        <v>8.77099193836671</v>
      </c>
      <c r="BD8" s="6">
        <v>1.70394335071603</v>
      </c>
      <c r="BE8" s="6">
        <v>6.61416312659242</v>
      </c>
      <c r="BF8" s="6">
        <v>10.1815943063257</v>
      </c>
      <c r="BG8" s="6">
        <v>1.54364998924484</v>
      </c>
      <c r="BH8" s="6">
        <v>1.83755708613961</v>
      </c>
      <c r="BI8" s="6">
        <v>-0.291344083234321</v>
      </c>
      <c r="BJ8" s="6">
        <v>0.975437395390543</v>
      </c>
      <c r="BK8" s="6">
        <v>7.29787632634202</v>
      </c>
      <c r="BL8" s="6">
        <v>4.48789652747962</v>
      </c>
      <c r="BM8" s="6">
        <v>5.99201454408865</v>
      </c>
      <c r="BN8" s="6">
        <v>8.93733003384204</v>
      </c>
      <c r="BO8" s="6">
        <v>6.01035275903507</v>
      </c>
      <c r="BP8" s="6">
        <v>10.9885970609469</v>
      </c>
      <c r="BQ8" s="6">
        <v>5.09843440866388</v>
      </c>
      <c r="BR8" s="6">
        <v>-0.143731207803</v>
      </c>
      <c r="BS8" s="6">
        <v>10.4839829718968</v>
      </c>
      <c r="BT8" s="6">
        <v>0.651285189922362</v>
      </c>
      <c r="BU8" s="6">
        <v>0.501901393926005</v>
      </c>
      <c r="BV8" s="6">
        <v>1.02750943949593</v>
      </c>
      <c r="BW8" s="6">
        <v>5.16775075072633</v>
      </c>
      <c r="BX8" s="6">
        <v>9.77982463181536</v>
      </c>
      <c r="BY8" s="6">
        <v>3.03937336142803</v>
      </c>
      <c r="BZ8" s="6">
        <v>2.40991718710234</v>
      </c>
      <c r="CA8" s="6">
        <v>3.9698838283083</v>
      </c>
      <c r="CB8" s="6">
        <v>5.6046716053778</v>
      </c>
      <c r="CC8" s="6">
        <v>-0.814234474969339</v>
      </c>
      <c r="CD8" s="6">
        <v>1.02668991774902</v>
      </c>
      <c r="CE8" s="6">
        <v>8.34740581471544</v>
      </c>
      <c r="CF8" s="6">
        <v>0.911906821937862</v>
      </c>
      <c r="CG8" s="6">
        <v>1.08212765859292</v>
      </c>
      <c r="CH8" s="6">
        <v>0.813447954205685</v>
      </c>
      <c r="CI8" s="6">
        <v>6.88288240059296</v>
      </c>
      <c r="CJ8" s="6">
        <v>4.01645840131152</v>
      </c>
      <c r="CK8" s="6">
        <v>5.21397697988243</v>
      </c>
      <c r="CL8" s="6">
        <v>11.5668606770387</v>
      </c>
      <c r="CM8" s="6">
        <v>12.3816671264153</v>
      </c>
      <c r="CN8" s="6">
        <v>41.768462094119</v>
      </c>
      <c r="CO8" s="6">
        <v>-0.916069637465739</v>
      </c>
      <c r="CP8" s="6">
        <v>5.50329506414289</v>
      </c>
      <c r="CQ8" s="6">
        <v>3.02096930271648</v>
      </c>
      <c r="CR8" s="6">
        <v>0.30899127960555</v>
      </c>
      <c r="CS8" s="6">
        <v>1.50101817456618</v>
      </c>
      <c r="CT8" s="6">
        <v>1.29516937125902</v>
      </c>
    </row>
    <row r="9" spans="2:98" ht="15" customHeight="true">
      <c r="B9" s="6">
        <v>68.5</v>
      </c>
      <c r="C9" s="6">
        <v>-3.60681948584306</v>
      </c>
      <c r="D9" s="6">
        <v>-6.00036774277305</v>
      </c>
      <c r="E9" s="6">
        <v>8.61316620087007</v>
      </c>
      <c r="F9" s="6">
        <v>0.190363129380785</v>
      </c>
      <c r="G9" s="6">
        <v>-2.66214218078392</v>
      </c>
      <c r="H9" s="6">
        <v>-7.12041355816211</v>
      </c>
      <c r="I9" s="6">
        <v>-7.32841877346573</v>
      </c>
      <c r="J9" s="6">
        <v>-6.06617543739787</v>
      </c>
      <c r="K9" s="6">
        <v>-8.67335023292912</v>
      </c>
      <c r="L9" s="6">
        <v>1.22856267753832</v>
      </c>
      <c r="M9" s="6">
        <v>1.49733686724977</v>
      </c>
      <c r="N9" s="6">
        <v>1.46180370019846</v>
      </c>
      <c r="O9" s="6">
        <v>-4.3901893256774</v>
      </c>
      <c r="P9" s="6">
        <v>-5.23259360024451</v>
      </c>
      <c r="Q9" s="6">
        <v>4.05792545627537</v>
      </c>
      <c r="R9" s="6">
        <v>8.48810528690876</v>
      </c>
      <c r="S9" s="6">
        <v>10.1915798833983</v>
      </c>
      <c r="T9" s="6">
        <v>3.04354465219831</v>
      </c>
      <c r="U9" s="6">
        <v>8.76240553818639</v>
      </c>
      <c r="V9" s="6">
        <v>8.60690522907896</v>
      </c>
      <c r="W9" s="6">
        <v>-3.94311754862974</v>
      </c>
      <c r="X9" s="6">
        <v>0.742473041789651</v>
      </c>
      <c r="Y9" s="6">
        <v>1.77179541378985</v>
      </c>
      <c r="Z9" s="6">
        <v>-0.267267793301357</v>
      </c>
      <c r="AA9" s="6">
        <v>-6.77222187086102</v>
      </c>
      <c r="AB9" s="6">
        <v>-0.248819698372017</v>
      </c>
      <c r="AC9" s="6">
        <v>-6.54905329283383</v>
      </c>
      <c r="AD9" s="6">
        <v>-2.42912776221613</v>
      </c>
      <c r="AE9" s="6">
        <v>-4.58889582002928</v>
      </c>
      <c r="AF9" s="6">
        <v>5.64860292792707</v>
      </c>
      <c r="AG9" s="6">
        <v>-17.2649733366387</v>
      </c>
      <c r="AH9" s="6">
        <v>-2.64070017133702</v>
      </c>
      <c r="AI9" s="6">
        <v>-3.98596920565456</v>
      </c>
      <c r="AJ9" s="6">
        <v>1.82344477733488</v>
      </c>
      <c r="AK9" s="6">
        <v>0.490603718426314</v>
      </c>
      <c r="AL9" s="6">
        <v>1.3694333572081</v>
      </c>
      <c r="AM9" s="6">
        <v>-6.13137664612418</v>
      </c>
      <c r="AN9" s="6">
        <v>-3.8985707377542</v>
      </c>
      <c r="AO9" s="6">
        <v>11.5932956576485</v>
      </c>
      <c r="AP9" s="6">
        <v>8.76253191077387</v>
      </c>
      <c r="AQ9" s="6">
        <v>-5.94435524157677</v>
      </c>
      <c r="AR9" s="6">
        <v>11.2613776746447</v>
      </c>
      <c r="AS9" s="6">
        <v>1.68230710522994</v>
      </c>
      <c r="AT9" s="6">
        <v>1.03174624183293</v>
      </c>
      <c r="AU9" s="6">
        <v>0.785456842663052</v>
      </c>
      <c r="AV9" s="6">
        <v>0.925300878058977</v>
      </c>
      <c r="AW9" s="6">
        <v>1.94513661224096</v>
      </c>
      <c r="AX9" s="6">
        <v>1.21150586989711</v>
      </c>
      <c r="AY9" s="6">
        <v>12.5044452351016</v>
      </c>
      <c r="AZ9" s="6">
        <v>13.6265703937823</v>
      </c>
      <c r="BA9" s="6">
        <v>18.0038434248601</v>
      </c>
      <c r="BB9" s="6">
        <v>17.9851930807105</v>
      </c>
      <c r="BC9" s="6">
        <v>19.9989900603057</v>
      </c>
      <c r="BD9" s="6">
        <v>10.3737178295851</v>
      </c>
      <c r="BE9" s="6">
        <v>10.2350257583344</v>
      </c>
      <c r="BF9" s="6">
        <v>12.0595975821685</v>
      </c>
      <c r="BG9" s="6">
        <v>2.01307500342438</v>
      </c>
      <c r="BH9" s="6">
        <v>2.10424449931736</v>
      </c>
      <c r="BI9" s="6">
        <v>-0.195410039789351</v>
      </c>
      <c r="BJ9" s="6">
        <v>0.623777066713842</v>
      </c>
      <c r="BK9" s="6">
        <v>16.7919399448554</v>
      </c>
      <c r="BL9" s="6">
        <v>15.4385009769121</v>
      </c>
      <c r="BM9" s="6">
        <v>16.994954644256</v>
      </c>
      <c r="BN9" s="6">
        <v>19.3933929801412</v>
      </c>
      <c r="BO9" s="6">
        <v>14.5678540384736</v>
      </c>
      <c r="BP9" s="6">
        <v>20.9082071890768</v>
      </c>
      <c r="BQ9" s="6">
        <v>6.04456646567911</v>
      </c>
      <c r="BR9" s="6">
        <v>-0.103096487411221</v>
      </c>
      <c r="BS9" s="6">
        <v>12.5984577023682</v>
      </c>
      <c r="BT9" s="6">
        <v>0.405680092246996</v>
      </c>
      <c r="BU9" s="6">
        <v>0.766963550179412</v>
      </c>
      <c r="BV9" s="6">
        <v>0.963880629851872</v>
      </c>
      <c r="BW9" s="6">
        <v>12.7160926809998</v>
      </c>
      <c r="BX9" s="6">
        <v>20.2543821039832</v>
      </c>
      <c r="BY9" s="6">
        <v>11.7392569526196</v>
      </c>
      <c r="BZ9" s="6">
        <v>12.4088706017686</v>
      </c>
      <c r="CA9" s="6">
        <v>12.1943361814597</v>
      </c>
      <c r="CB9" s="6">
        <v>18.1679019348472</v>
      </c>
      <c r="CC9" s="6">
        <v>-0.515506248856241</v>
      </c>
      <c r="CD9" s="6">
        <v>0.936083765866442</v>
      </c>
      <c r="CE9" s="6">
        <v>10.0877393397384</v>
      </c>
      <c r="CF9" s="6">
        <v>0.265411035594354</v>
      </c>
      <c r="CG9" s="6">
        <v>1.40609727839848</v>
      </c>
      <c r="CH9" s="6">
        <v>1.08456558922967</v>
      </c>
      <c r="CI9" s="6">
        <v>15.9128994416415</v>
      </c>
      <c r="CJ9" s="6">
        <v>14.2801887764457</v>
      </c>
      <c r="CK9" s="6">
        <v>14.1824012047819</v>
      </c>
      <c r="CL9" s="6">
        <v>22.598647499231</v>
      </c>
      <c r="CM9" s="6">
        <v>22.3363105914444</v>
      </c>
      <c r="CN9" s="6">
        <v>43.4164586742517</v>
      </c>
      <c r="CO9" s="6">
        <v>-0.00859783768919442</v>
      </c>
      <c r="CP9" s="6">
        <v>6.94581388925377</v>
      </c>
      <c r="CQ9" s="6">
        <v>3.46306786110466</v>
      </c>
      <c r="CR9" s="6">
        <v>-0.337176903696729</v>
      </c>
      <c r="CS9" s="6">
        <v>0.829952351589952</v>
      </c>
      <c r="CT9" s="6">
        <v>0.586578618515262</v>
      </c>
    </row>
    <row r="10" spans="2:98" ht="15" customHeight="true">
      <c r="B10" s="6">
        <v>69</v>
      </c>
      <c r="C10" s="6">
        <v>4.70231050838709</v>
      </c>
      <c r="D10" s="6">
        <v>-4.90855099667874</v>
      </c>
      <c r="E10" s="6">
        <v>18.8232248265259</v>
      </c>
      <c r="F10" s="6">
        <v>5.08587218639445</v>
      </c>
      <c r="G10" s="6">
        <v>8.13659733569398</v>
      </c>
      <c r="H10" s="6">
        <v>-3.55734518364329</v>
      </c>
      <c r="I10" s="6">
        <v>-3.64119496914464</v>
      </c>
      <c r="J10" s="6">
        <v>2.72639952227189</v>
      </c>
      <c r="K10" s="6">
        <v>-3.84121381953764</v>
      </c>
      <c r="L10" s="6">
        <v>1.79776165941666</v>
      </c>
      <c r="M10" s="6">
        <v>1.65598779126918</v>
      </c>
      <c r="N10" s="6">
        <v>1.76905400882413</v>
      </c>
      <c r="O10" s="6">
        <v>-1.22964608277141</v>
      </c>
      <c r="P10" s="6">
        <v>-0.941012336925382</v>
      </c>
      <c r="Q10" s="6">
        <v>14.2740752797829</v>
      </c>
      <c r="R10" s="6">
        <v>18.7553319656766</v>
      </c>
      <c r="S10" s="6">
        <v>21.6903141418242</v>
      </c>
      <c r="T10" s="6">
        <v>10.6007906596279</v>
      </c>
      <c r="U10" s="6">
        <v>19.2506556527196</v>
      </c>
      <c r="V10" s="6">
        <v>17.2365595419191</v>
      </c>
      <c r="W10" s="6">
        <v>3.13226672167502</v>
      </c>
      <c r="X10" s="6">
        <v>0.694781596050291</v>
      </c>
      <c r="Y10" s="6">
        <v>1.81422533359336</v>
      </c>
      <c r="Z10" s="6">
        <v>0.28237901856312</v>
      </c>
      <c r="AA10" s="6">
        <v>-2.72329053501232</v>
      </c>
      <c r="AB10" s="6">
        <v>10.8397573333905</v>
      </c>
      <c r="AC10" s="6">
        <v>0.169154937745589</v>
      </c>
      <c r="AD10" s="6">
        <v>3.45369849492965</v>
      </c>
      <c r="AE10" s="6">
        <v>3.80506554489602</v>
      </c>
      <c r="AF10" s="6">
        <v>18.218820826476</v>
      </c>
      <c r="AG10" s="6">
        <v>-12.6624973383185</v>
      </c>
      <c r="AH10" s="6">
        <v>3.82875267362238</v>
      </c>
      <c r="AI10" s="6">
        <v>2.86308469049061</v>
      </c>
      <c r="AJ10" s="6">
        <v>1.20091068640193</v>
      </c>
      <c r="AK10" s="6">
        <v>0.180479647571019</v>
      </c>
      <c r="AL10" s="6">
        <v>1.92235581104507</v>
      </c>
      <c r="AM10" s="6">
        <v>-0.0835469917167302</v>
      </c>
      <c r="AN10" s="6">
        <v>4.58832023357616</v>
      </c>
      <c r="AO10" s="6">
        <v>21.7978641612942</v>
      </c>
      <c r="AP10" s="6">
        <v>20.2674863227993</v>
      </c>
      <c r="AQ10" s="6">
        <v>1.20708588205059</v>
      </c>
      <c r="AR10" s="6">
        <v>19.5882207470335</v>
      </c>
      <c r="AS10" s="6">
        <v>10.63113384017</v>
      </c>
      <c r="AT10" s="6">
        <v>9.87826171524784</v>
      </c>
      <c r="AU10" s="6">
        <v>5.85391996740407</v>
      </c>
      <c r="AV10" s="6">
        <v>0.872370737329618</v>
      </c>
      <c r="AW10" s="6">
        <v>1.81987558044068</v>
      </c>
      <c r="AX10" s="6">
        <v>1.4967837606228</v>
      </c>
      <c r="AY10" s="6">
        <v>21.3223523855802</v>
      </c>
      <c r="AZ10" s="6">
        <v>23.3567770999542</v>
      </c>
      <c r="BA10" s="6">
        <v>29.6417762035964</v>
      </c>
      <c r="BB10" s="6">
        <v>29.6563466471854</v>
      </c>
      <c r="BC10" s="6">
        <v>30.4833335745494</v>
      </c>
      <c r="BD10" s="6">
        <v>20.2886479143464</v>
      </c>
      <c r="BE10" s="6">
        <v>15.0391409793774</v>
      </c>
      <c r="BF10" s="6">
        <v>15.3309037888163</v>
      </c>
      <c r="BG10" s="6">
        <v>2.4742267736442</v>
      </c>
      <c r="BH10" s="6">
        <v>2.16835062586136</v>
      </c>
      <c r="BI10" s="6">
        <v>0.549472660918525</v>
      </c>
      <c r="BJ10" s="6">
        <v>0.989944659854814</v>
      </c>
      <c r="BK10" s="6">
        <v>27.1756461863251</v>
      </c>
      <c r="BL10" s="6">
        <v>26.7654409132969</v>
      </c>
      <c r="BM10" s="6">
        <v>27.6324293383954</v>
      </c>
      <c r="BN10" s="6">
        <v>29.3948631874584</v>
      </c>
      <c r="BO10" s="6">
        <v>23.8588940964637</v>
      </c>
      <c r="BP10" s="6">
        <v>30.2714312777624</v>
      </c>
      <c r="BQ10" s="6">
        <v>7.4518908090119</v>
      </c>
      <c r="BR10" s="6">
        <v>0.667397905283508</v>
      </c>
      <c r="BS10" s="6">
        <v>16.987194722248</v>
      </c>
      <c r="BT10" s="6">
        <v>0.582684434430178</v>
      </c>
      <c r="BU10" s="6">
        <v>1.67616156573666</v>
      </c>
      <c r="BV10" s="6">
        <v>1.09316008052639</v>
      </c>
      <c r="BW10" s="6">
        <v>21.2661946602129</v>
      </c>
      <c r="BX10" s="6">
        <v>30.4845657082083</v>
      </c>
      <c r="BY10" s="6">
        <v>20.9826468093278</v>
      </c>
      <c r="BZ10" s="6">
        <v>23.2323516071608</v>
      </c>
      <c r="CA10" s="6">
        <v>21.2076948841051</v>
      </c>
      <c r="CB10" s="6">
        <v>29.0245199528833</v>
      </c>
      <c r="CC10" s="6">
        <v>-0.165405300576367</v>
      </c>
      <c r="CD10" s="6">
        <v>1.58598334777662</v>
      </c>
      <c r="CE10" s="6">
        <v>13.335464380581</v>
      </c>
      <c r="CF10" s="6">
        <v>0.39088869194137</v>
      </c>
      <c r="CG10" s="6">
        <v>1.36751683137805</v>
      </c>
      <c r="CH10" s="6">
        <v>1.23191090656894</v>
      </c>
      <c r="CI10" s="6">
        <v>24.2308590018118</v>
      </c>
      <c r="CJ10" s="6">
        <v>25.0808047329845</v>
      </c>
      <c r="CK10" s="6">
        <v>23.3342111692641</v>
      </c>
      <c r="CL10" s="6">
        <v>31.8668576123097</v>
      </c>
      <c r="CM10" s="6">
        <v>31.5341466710094</v>
      </c>
      <c r="CN10" s="6">
        <v>43.9460854917646</v>
      </c>
      <c r="CO10" s="6">
        <v>1.11976614240604</v>
      </c>
      <c r="CP10" s="6">
        <v>8.8407124575819</v>
      </c>
      <c r="CQ10" s="6">
        <v>4.42285837408633</v>
      </c>
      <c r="CR10" s="6">
        <v>-0.450716824815458</v>
      </c>
      <c r="CS10" s="6">
        <v>1.15820821457686</v>
      </c>
      <c r="CT10" s="6">
        <v>0.86081866704393</v>
      </c>
    </row>
    <row r="11" spans="2:98" ht="15" customHeight="true">
      <c r="B11" s="6">
        <v>69.5</v>
      </c>
      <c r="C11" s="6">
        <v>14.535136420864</v>
      </c>
      <c r="D11" s="6">
        <v>-1.3369197918189</v>
      </c>
      <c r="E11" s="6">
        <v>29.3549131338127</v>
      </c>
      <c r="F11" s="6">
        <v>12.3136153650834</v>
      </c>
      <c r="G11" s="6">
        <v>19.4768544761192</v>
      </c>
      <c r="H11" s="6">
        <v>3.08095527946637</v>
      </c>
      <c r="I11" s="6">
        <v>2.85185597481643</v>
      </c>
      <c r="J11" s="6">
        <v>13.5763186112865</v>
      </c>
      <c r="K11" s="6">
        <v>4.2049248028186</v>
      </c>
      <c r="L11" s="6">
        <v>1.90607948879415</v>
      </c>
      <c r="M11" s="6">
        <v>1.38070971136546</v>
      </c>
      <c r="N11" s="6">
        <v>1.39889824430549</v>
      </c>
      <c r="O11" s="6">
        <v>3.72927264294469</v>
      </c>
      <c r="P11" s="6">
        <v>6.53323807238098</v>
      </c>
      <c r="Q11" s="6">
        <v>25.5146467140996</v>
      </c>
      <c r="R11" s="6">
        <v>29.4365350842269</v>
      </c>
      <c r="S11" s="6">
        <v>31.4612350525546</v>
      </c>
      <c r="T11" s="6">
        <v>19.9314938341613</v>
      </c>
      <c r="U11" s="6">
        <v>29.8017302932607</v>
      </c>
      <c r="V11" s="6">
        <v>26.4223330280118</v>
      </c>
      <c r="W11" s="6">
        <v>12.6035294093209</v>
      </c>
      <c r="X11" s="6">
        <v>1.09659546349309</v>
      </c>
      <c r="Y11" s="6">
        <v>1.96722164304572</v>
      </c>
      <c r="Z11" s="6">
        <v>0.57968450402717</v>
      </c>
      <c r="AA11" s="6">
        <v>3.92030887824649</v>
      </c>
      <c r="AB11" s="6">
        <v>23.0504489457766</v>
      </c>
      <c r="AC11" s="6">
        <v>10.0314961015372</v>
      </c>
      <c r="AD11" s="6">
        <v>11.9060037455371</v>
      </c>
      <c r="AE11" s="6">
        <v>14.5494248354827</v>
      </c>
      <c r="AF11" s="6">
        <v>29.9075611465044</v>
      </c>
      <c r="AG11" s="6">
        <v>-0.550349430369238</v>
      </c>
      <c r="AH11" s="6">
        <v>12.5946731586129</v>
      </c>
      <c r="AI11" s="6">
        <v>12.7692476318748</v>
      </c>
      <c r="AJ11" s="6">
        <v>0.949724688902677</v>
      </c>
      <c r="AK11" s="6">
        <v>0.94601938642387</v>
      </c>
      <c r="AL11" s="6">
        <v>1.68655247584076</v>
      </c>
      <c r="AM11" s="6">
        <v>9.06623862773631</v>
      </c>
      <c r="AN11" s="6">
        <v>14.9177480709907</v>
      </c>
      <c r="AO11" s="6">
        <v>31.0256525308686</v>
      </c>
      <c r="AP11" s="6">
        <v>32.0072846393887</v>
      </c>
      <c r="AQ11" s="6">
        <v>10.5483282564442</v>
      </c>
      <c r="AR11" s="6">
        <v>26.800552286356</v>
      </c>
      <c r="AS11" s="6">
        <v>20.9520785689818</v>
      </c>
      <c r="AT11" s="6">
        <v>20.9912101235379</v>
      </c>
      <c r="AU11" s="6">
        <v>13.6761024767451</v>
      </c>
      <c r="AV11" s="6">
        <v>1.5782007569108</v>
      </c>
      <c r="AW11" s="6">
        <v>1.63681987385166</v>
      </c>
      <c r="AX11" s="6">
        <v>1.3995394709948</v>
      </c>
      <c r="AY11" s="6">
        <v>31.2929627462113</v>
      </c>
      <c r="AZ11" s="6">
        <v>33.5045341248167</v>
      </c>
      <c r="BA11" s="6">
        <v>39.9731158213837</v>
      </c>
      <c r="BB11" s="6">
        <v>41.1561894857357</v>
      </c>
      <c r="BC11" s="6">
        <v>39.6516146876338</v>
      </c>
      <c r="BD11" s="6">
        <v>30.8568409197848</v>
      </c>
      <c r="BE11" s="6">
        <v>21.1164922389276</v>
      </c>
      <c r="BF11" s="6">
        <v>21.1977172667723</v>
      </c>
      <c r="BG11" s="6">
        <v>2.55861734748532</v>
      </c>
      <c r="BH11" s="6">
        <v>2.48302380857774</v>
      </c>
      <c r="BI11" s="6">
        <v>1.10178850545265</v>
      </c>
      <c r="BJ11" s="6">
        <v>1.34386927468512</v>
      </c>
      <c r="BK11" s="6">
        <v>37.1422761439742</v>
      </c>
      <c r="BL11" s="6">
        <v>35.9008190103581</v>
      </c>
      <c r="BM11" s="6">
        <v>37.2024379798956</v>
      </c>
      <c r="BN11" s="6">
        <v>38.8102162653581</v>
      </c>
      <c r="BO11" s="6">
        <v>32.5427217828691</v>
      </c>
      <c r="BP11" s="6">
        <v>39.1224524722899</v>
      </c>
      <c r="BQ11" s="6">
        <v>8.58841755572877</v>
      </c>
      <c r="BR11" s="6">
        <v>1.21797902352336</v>
      </c>
      <c r="BS11" s="6">
        <v>23.3770858730128</v>
      </c>
      <c r="BT11" s="6">
        <v>0.654868206222204</v>
      </c>
      <c r="BU11" s="6">
        <v>2.3865437288822</v>
      </c>
      <c r="BV11" s="6">
        <v>1.27937253086418</v>
      </c>
      <c r="BW11" s="6">
        <v>31.4359427796546</v>
      </c>
      <c r="BX11" s="6">
        <v>40.0478540515555</v>
      </c>
      <c r="BY11" s="6">
        <v>30.4456844210835</v>
      </c>
      <c r="BZ11" s="6">
        <v>34.7821828942576</v>
      </c>
      <c r="CA11" s="6">
        <v>31.9805570271843</v>
      </c>
      <c r="CB11" s="6">
        <v>38.7758828295015</v>
      </c>
      <c r="CC11" s="6">
        <v>0.65889323210348</v>
      </c>
      <c r="CD11" s="6">
        <v>2.48032045665673</v>
      </c>
      <c r="CE11" s="6">
        <v>17.6253755204464</v>
      </c>
      <c r="CF11" s="6">
        <v>0.142803181287661</v>
      </c>
      <c r="CG11" s="6">
        <v>1.30030099989364</v>
      </c>
      <c r="CH11" s="6">
        <v>1.51752401937159</v>
      </c>
      <c r="CI11" s="6">
        <v>31.9478193651331</v>
      </c>
      <c r="CJ11" s="6">
        <v>34.4600278814373</v>
      </c>
      <c r="CK11" s="6">
        <v>32.3403599448465</v>
      </c>
      <c r="CL11" s="6">
        <v>39.852437544302</v>
      </c>
      <c r="CM11" s="6">
        <v>38.5308251505679</v>
      </c>
      <c r="CN11" s="6">
        <v>44.3218860643048</v>
      </c>
      <c r="CO11" s="6">
        <v>2.34037400235059</v>
      </c>
      <c r="CP11" s="6">
        <v>11.0107401448137</v>
      </c>
      <c r="CQ11" s="6">
        <v>6.11637048050784</v>
      </c>
      <c r="CR11" s="6">
        <v>0.767635962094516</v>
      </c>
      <c r="CS11" s="6">
        <v>1.38868027346155</v>
      </c>
      <c r="CT11" s="6">
        <v>0.904651916425678</v>
      </c>
    </row>
    <row r="12" spans="2:98" ht="15" customHeight="true">
      <c r="B12" s="6">
        <v>70</v>
      </c>
      <c r="C12" s="6">
        <v>23.6601680248206</v>
      </c>
      <c r="D12" s="6">
        <v>4.91946928856521</v>
      </c>
      <c r="E12" s="6">
        <v>39.0342516230314</v>
      </c>
      <c r="F12" s="6">
        <v>20.8876760509954</v>
      </c>
      <c r="G12" s="6">
        <v>29.9555519126185</v>
      </c>
      <c r="H12" s="6">
        <v>13.0931496442621</v>
      </c>
      <c r="I12" s="6">
        <v>11.8972923916552</v>
      </c>
      <c r="J12" s="6">
        <v>24.7998250938422</v>
      </c>
      <c r="K12" s="6">
        <v>15.4964385999218</v>
      </c>
      <c r="L12" s="6">
        <v>1.65316153640202</v>
      </c>
      <c r="M12" s="6">
        <v>1.72493074839144</v>
      </c>
      <c r="N12" s="6">
        <v>1.58196446479138</v>
      </c>
      <c r="O12" s="6">
        <v>10.6808752328838</v>
      </c>
      <c r="P12" s="6">
        <v>16.4535526690855</v>
      </c>
      <c r="Q12" s="6">
        <v>35.3366010106109</v>
      </c>
      <c r="R12" s="6">
        <v>38.5075443906463</v>
      </c>
      <c r="S12" s="6">
        <v>38.5932764729154</v>
      </c>
      <c r="T12" s="6">
        <v>28.8485323935405</v>
      </c>
      <c r="U12" s="6">
        <v>38.5796374699522</v>
      </c>
      <c r="V12" s="6">
        <v>35.3347887060206</v>
      </c>
      <c r="W12" s="6">
        <v>23.2323499174652</v>
      </c>
      <c r="X12" s="6">
        <v>1.49622733386661</v>
      </c>
      <c r="Y12" s="6">
        <v>2.08001423929392</v>
      </c>
      <c r="Z12" s="6">
        <v>0.634841739386445</v>
      </c>
      <c r="AA12" s="6">
        <v>13.1014974062862</v>
      </c>
      <c r="AB12" s="6">
        <v>34.5958398783736</v>
      </c>
      <c r="AC12" s="6">
        <v>22.4545434336638</v>
      </c>
      <c r="AD12" s="6">
        <v>22.9365229816983</v>
      </c>
      <c r="AE12" s="6">
        <v>26.5954601687552</v>
      </c>
      <c r="AF12" s="6">
        <v>39.4717509989968</v>
      </c>
      <c r="AG12" s="6">
        <v>18.3571674460774</v>
      </c>
      <c r="AH12" s="6">
        <v>23.437611223147</v>
      </c>
      <c r="AI12" s="6">
        <v>24.5635639201231</v>
      </c>
      <c r="AJ12" s="6">
        <v>1.3681890230161</v>
      </c>
      <c r="AK12" s="6">
        <v>1.61785417993934</v>
      </c>
      <c r="AL12" s="6">
        <v>1.51647511889394</v>
      </c>
      <c r="AM12" s="6">
        <v>19.5831226158231</v>
      </c>
      <c r="AN12" s="6">
        <v>24.782660437144</v>
      </c>
      <c r="AO12" s="6">
        <v>38.4006582655296</v>
      </c>
      <c r="AP12" s="6">
        <v>41.9436071842861</v>
      </c>
      <c r="AQ12" s="6">
        <v>22.4095474734901</v>
      </c>
      <c r="AR12" s="6">
        <v>33.528273031885</v>
      </c>
      <c r="AS12" s="6">
        <v>31.0833886095829</v>
      </c>
      <c r="AT12" s="6">
        <v>31.7148620254961</v>
      </c>
      <c r="AU12" s="6">
        <v>24.4054423114559</v>
      </c>
      <c r="AV12" s="6">
        <v>2.06073238037192</v>
      </c>
      <c r="AW12" s="6">
        <v>1.16816369572064</v>
      </c>
      <c r="AX12" s="6">
        <v>1.63126366487523</v>
      </c>
      <c r="AY12" s="6">
        <v>41.2781413247122</v>
      </c>
      <c r="AZ12" s="6">
        <v>42.2101863109751</v>
      </c>
      <c r="BA12" s="6">
        <v>48.7576286628613</v>
      </c>
      <c r="BB12" s="6">
        <v>50.3404048146816</v>
      </c>
      <c r="BC12" s="6">
        <v>47.0937334346233</v>
      </c>
      <c r="BD12" s="6">
        <v>41.18610436584</v>
      </c>
      <c r="BE12" s="6">
        <v>27.9529647095074</v>
      </c>
      <c r="BF12" s="6">
        <v>31.0656162762597</v>
      </c>
      <c r="BG12" s="6">
        <v>2.87418985723644</v>
      </c>
      <c r="BH12" s="6">
        <v>2.08981353896581</v>
      </c>
      <c r="BI12" s="6">
        <v>1.51427096729236</v>
      </c>
      <c r="BJ12" s="6">
        <v>1.4311795857526</v>
      </c>
      <c r="BK12" s="6">
        <v>45.3484118742544</v>
      </c>
      <c r="BL12" s="6">
        <v>43.386403662348</v>
      </c>
      <c r="BM12" s="6">
        <v>45.1096367822645</v>
      </c>
      <c r="BN12" s="6">
        <v>46.4494984443295</v>
      </c>
      <c r="BO12" s="6">
        <v>39.6585931928557</v>
      </c>
      <c r="BP12" s="6">
        <v>45.7343552577951</v>
      </c>
      <c r="BQ12" s="6">
        <v>10.6482775988233</v>
      </c>
      <c r="BR12" s="6">
        <v>2.4263044906217</v>
      </c>
      <c r="BS12" s="6">
        <v>31.4501824488713</v>
      </c>
      <c r="BT12" s="6">
        <v>1.07925756370798</v>
      </c>
      <c r="BU12" s="6">
        <v>2.61849351015672</v>
      </c>
      <c r="BV12" s="6">
        <v>1.68449196051426</v>
      </c>
      <c r="BW12" s="6">
        <v>41.8067660627532</v>
      </c>
      <c r="BX12" s="6">
        <v>46.9225244459061</v>
      </c>
      <c r="BY12" s="6">
        <v>39.3865372930816</v>
      </c>
      <c r="BZ12" s="6">
        <v>45.1504256521197</v>
      </c>
      <c r="CA12" s="6">
        <v>41.5390106496374</v>
      </c>
      <c r="CB12" s="6">
        <v>46.4277214684947</v>
      </c>
      <c r="CC12" s="6">
        <v>1.94494383079956</v>
      </c>
      <c r="CD12" s="6">
        <v>3.01163975888852</v>
      </c>
      <c r="CE12" s="6">
        <v>22.5636758807498</v>
      </c>
      <c r="CF12" s="6">
        <v>-0.183050336690144</v>
      </c>
      <c r="CG12" s="6">
        <v>1.33909156190208</v>
      </c>
      <c r="CH12" s="6">
        <v>1.59514960025501</v>
      </c>
      <c r="CI12" s="6">
        <v>38.5608817898822</v>
      </c>
      <c r="CJ12" s="6">
        <v>42.0179166083954</v>
      </c>
      <c r="CK12" s="6">
        <v>39.003725983896</v>
      </c>
      <c r="CL12" s="6">
        <v>46.160133145319</v>
      </c>
      <c r="CM12" s="6">
        <v>43.0694862641394</v>
      </c>
      <c r="CN12" s="6">
        <v>44.6295484686154</v>
      </c>
      <c r="CO12" s="6">
        <v>2.87985460704732</v>
      </c>
      <c r="CP12" s="6">
        <v>14.479187281714</v>
      </c>
      <c r="CQ12" s="6">
        <v>8.4245624667742</v>
      </c>
      <c r="CR12" s="6">
        <v>1.49473741824909</v>
      </c>
      <c r="CS12" s="6">
        <v>0.876190961769282</v>
      </c>
      <c r="CT12" s="6">
        <v>0.312524938989611</v>
      </c>
    </row>
    <row r="13" spans="2:98" ht="15" customHeight="true">
      <c r="B13" s="6">
        <v>70.5</v>
      </c>
      <c r="C13" s="6">
        <v>31.8762574167252</v>
      </c>
      <c r="D13" s="6">
        <v>13.1773468540861</v>
      </c>
      <c r="E13" s="6">
        <v>45.6894325725023</v>
      </c>
      <c r="F13" s="6">
        <v>31.1652916839084</v>
      </c>
      <c r="G13" s="6">
        <v>39.3419353606527</v>
      </c>
      <c r="H13" s="6">
        <v>24.6277619930328</v>
      </c>
      <c r="I13" s="6">
        <v>23.0014428743015</v>
      </c>
      <c r="J13" s="6">
        <v>35.2290200057677</v>
      </c>
      <c r="K13" s="6">
        <v>27.1994080183854</v>
      </c>
      <c r="L13" s="6">
        <v>1.8367353497336</v>
      </c>
      <c r="M13" s="6">
        <v>2.17881399892735</v>
      </c>
      <c r="N13" s="6">
        <v>1.56224023620814</v>
      </c>
      <c r="O13" s="6">
        <v>19.146136562661</v>
      </c>
      <c r="P13" s="6">
        <v>26.696647630578</v>
      </c>
      <c r="Q13" s="6">
        <v>42.6368234212368</v>
      </c>
      <c r="R13" s="6">
        <v>45.8534583226842</v>
      </c>
      <c r="S13" s="6">
        <v>44.0273621527429</v>
      </c>
      <c r="T13" s="6">
        <v>35.8605725738324</v>
      </c>
      <c r="U13" s="6">
        <v>44.2301501186726</v>
      </c>
      <c r="V13" s="6">
        <v>41.9499668047359</v>
      </c>
      <c r="W13" s="6">
        <v>33.9921061625397</v>
      </c>
      <c r="X13" s="6">
        <v>1.4781815542089</v>
      </c>
      <c r="Y13" s="6">
        <v>2.21782709279915</v>
      </c>
      <c r="Z13" s="6">
        <v>0.984002232084947</v>
      </c>
      <c r="AA13" s="6">
        <v>23.727465560932</v>
      </c>
      <c r="AB13" s="6">
        <v>43.7383294550336</v>
      </c>
      <c r="AC13" s="6">
        <v>34.5348793057575</v>
      </c>
      <c r="AD13" s="6">
        <v>34.8566337945688</v>
      </c>
      <c r="AE13" s="6">
        <v>38.7026600453728</v>
      </c>
      <c r="AF13" s="6">
        <v>47.138465829678</v>
      </c>
      <c r="AG13" s="6">
        <v>36.538196375036</v>
      </c>
      <c r="AH13" s="6">
        <v>35.5839087773279</v>
      </c>
      <c r="AI13" s="6">
        <v>36.6751134716997</v>
      </c>
      <c r="AJ13" s="6">
        <v>0.999571624476232</v>
      </c>
      <c r="AK13" s="6">
        <v>1.77721270108248</v>
      </c>
      <c r="AL13" s="6">
        <v>1.79928621137464</v>
      </c>
      <c r="AM13" s="6">
        <v>29.6843718201448</v>
      </c>
      <c r="AN13" s="6">
        <v>33.3320047410566</v>
      </c>
      <c r="AO13" s="6">
        <v>44.1823278423179</v>
      </c>
      <c r="AP13" s="6">
        <v>49.625931117311</v>
      </c>
      <c r="AQ13" s="6">
        <v>35.0060293625796</v>
      </c>
      <c r="AR13" s="6">
        <v>40.3732123920499</v>
      </c>
      <c r="AS13" s="6">
        <v>40.3769319426864</v>
      </c>
      <c r="AT13" s="6">
        <v>39.9609483686535</v>
      </c>
      <c r="AU13" s="6">
        <v>34.4902252497235</v>
      </c>
      <c r="AV13" s="6">
        <v>2.08169309178692</v>
      </c>
      <c r="AW13" s="6">
        <v>0.419072691410918</v>
      </c>
      <c r="AX13" s="6">
        <v>1.87101869126775</v>
      </c>
      <c r="AY13" s="6">
        <v>48.7074083947999</v>
      </c>
      <c r="AZ13" s="6">
        <v>49.0610587734151</v>
      </c>
      <c r="BA13" s="6">
        <v>54.831192604297</v>
      </c>
      <c r="BB13" s="6">
        <v>56.0804764744363</v>
      </c>
      <c r="BC13" s="6">
        <v>52.75314389464</v>
      </c>
      <c r="BD13" s="6">
        <v>49.9514716332962</v>
      </c>
      <c r="BE13" s="6">
        <v>34.4738536438155</v>
      </c>
      <c r="BF13" s="6">
        <v>44.5564327144885</v>
      </c>
      <c r="BG13" s="6">
        <v>3.12588092405855</v>
      </c>
      <c r="BH13" s="6">
        <v>0.966385261262928</v>
      </c>
      <c r="BI13" s="6">
        <v>1.79111585784079</v>
      </c>
      <c r="BJ13" s="6">
        <v>1.71468634673045</v>
      </c>
      <c r="BK13" s="6">
        <v>50.9742857722515</v>
      </c>
      <c r="BL13" s="6">
        <v>49.0377158027946</v>
      </c>
      <c r="BM13" s="6">
        <v>50.4655782610749</v>
      </c>
      <c r="BN13" s="6">
        <v>51.5083607565044</v>
      </c>
      <c r="BO13" s="6">
        <v>45.3307136040092</v>
      </c>
      <c r="BP13" s="6">
        <v>49.9772177854342</v>
      </c>
      <c r="BQ13" s="6">
        <v>13.8092749430069</v>
      </c>
      <c r="BR13" s="6">
        <v>3.79762341579414</v>
      </c>
      <c r="BS13" s="6">
        <v>42.506408142593</v>
      </c>
      <c r="BT13" s="6">
        <v>1.64811983097172</v>
      </c>
      <c r="BU13" s="6">
        <v>2.49108461998014</v>
      </c>
      <c r="BV13" s="6">
        <v>2.30219000058571</v>
      </c>
      <c r="BW13" s="6">
        <v>49.5451748491621</v>
      </c>
      <c r="BX13" s="6">
        <v>51.4213551188982</v>
      </c>
      <c r="BY13" s="6">
        <v>46.7024456860565</v>
      </c>
      <c r="BZ13" s="6">
        <v>53.6918807923756</v>
      </c>
      <c r="CA13" s="6">
        <v>48.4178884697033</v>
      </c>
      <c r="CB13" s="6">
        <v>50.3294552289244</v>
      </c>
      <c r="CC13" s="6">
        <v>2.52177464175696</v>
      </c>
      <c r="CD13" s="6">
        <v>3.65542557381485</v>
      </c>
      <c r="CE13" s="6">
        <v>28.2778227849892</v>
      </c>
      <c r="CF13" s="6">
        <v>0.480114921197924</v>
      </c>
      <c r="CG13" s="6">
        <v>1.3472783084265</v>
      </c>
      <c r="CH13" s="6">
        <v>1.23996938575237</v>
      </c>
      <c r="CI13" s="6">
        <v>43.0584642323252</v>
      </c>
      <c r="CJ13" s="6">
        <v>47.7496439226184</v>
      </c>
      <c r="CK13" s="6">
        <v>43.7532732551423</v>
      </c>
      <c r="CL13" s="6">
        <v>49.9523376549234</v>
      </c>
      <c r="CM13" s="6">
        <v>46.5178804722059</v>
      </c>
      <c r="CN13" s="6">
        <v>45.0706433075529</v>
      </c>
      <c r="CO13" s="6">
        <v>3.08659458700191</v>
      </c>
      <c r="CP13" s="6">
        <v>17.2883796139378</v>
      </c>
      <c r="CQ13" s="6">
        <v>10.0882064626405</v>
      </c>
      <c r="CR13" s="6">
        <v>0.949685584855274</v>
      </c>
      <c r="CS13" s="6">
        <v>0.953521875905665</v>
      </c>
      <c r="CT13" s="6">
        <v>0.312121160115851</v>
      </c>
    </row>
    <row r="14" spans="2:98" ht="15" customHeight="true">
      <c r="B14" s="6">
        <v>71</v>
      </c>
      <c r="C14" s="6">
        <v>38.4153264527134</v>
      </c>
      <c r="D14" s="6">
        <v>22.0377599706314</v>
      </c>
      <c r="E14" s="6">
        <v>49.6442018833027</v>
      </c>
      <c r="F14" s="6">
        <v>41.3643688325565</v>
      </c>
      <c r="G14" s="6">
        <v>45.6695115447344</v>
      </c>
      <c r="H14" s="6">
        <v>35.2915201331969</v>
      </c>
      <c r="I14" s="6">
        <v>33.4439197888418</v>
      </c>
      <c r="J14" s="6">
        <v>43.0747589469123</v>
      </c>
      <c r="K14" s="6">
        <v>37.5100869247145</v>
      </c>
      <c r="L14" s="6">
        <v>1.83851992625767</v>
      </c>
      <c r="M14" s="6">
        <v>1.62120034676366</v>
      </c>
      <c r="N14" s="6">
        <v>0.735475813967071</v>
      </c>
      <c r="O14" s="6">
        <v>27.5097985432706</v>
      </c>
      <c r="P14" s="6">
        <v>36.2824523311899</v>
      </c>
      <c r="Q14" s="6">
        <v>47.797406139868</v>
      </c>
      <c r="R14" s="6">
        <v>51.2854831096483</v>
      </c>
      <c r="S14" s="6">
        <v>47.1895311654318</v>
      </c>
      <c r="T14" s="6">
        <v>41.5325249865376</v>
      </c>
      <c r="U14" s="6">
        <v>47.7331705219616</v>
      </c>
      <c r="V14" s="6">
        <v>45.7221590668479</v>
      </c>
      <c r="W14" s="6">
        <v>43.0123181392067</v>
      </c>
      <c r="X14" s="6">
        <v>1.6506677476001</v>
      </c>
      <c r="Y14" s="6">
        <v>2.25657515430441</v>
      </c>
      <c r="Z14" s="6">
        <v>1.4057327451809</v>
      </c>
      <c r="AA14" s="6">
        <v>33.9974048097442</v>
      </c>
      <c r="AB14" s="6">
        <v>49.749807394564</v>
      </c>
      <c r="AC14" s="6">
        <v>44.8780134617737</v>
      </c>
      <c r="AD14" s="6">
        <v>45.4478790700252</v>
      </c>
      <c r="AE14" s="6">
        <v>48.652810681289</v>
      </c>
      <c r="AF14" s="6">
        <v>51.8051435380198</v>
      </c>
      <c r="AG14" s="6">
        <v>50.4144718598872</v>
      </c>
      <c r="AH14" s="6">
        <v>45.6888586390986</v>
      </c>
      <c r="AI14" s="6">
        <v>46.3340726805163</v>
      </c>
      <c r="AJ14" s="6">
        <v>0.062679133722952</v>
      </c>
      <c r="AK14" s="6">
        <v>2.23108808367976</v>
      </c>
      <c r="AL14" s="6">
        <v>1.55026590871978</v>
      </c>
      <c r="AM14" s="6">
        <v>38.5086993735858</v>
      </c>
      <c r="AN14" s="6">
        <v>40.0169987267647</v>
      </c>
      <c r="AO14" s="6">
        <v>47.625949547582</v>
      </c>
      <c r="AP14" s="6">
        <v>54.7485573769609</v>
      </c>
      <c r="AQ14" s="6">
        <v>44.533568505756</v>
      </c>
      <c r="AR14" s="6">
        <v>45.19052373472</v>
      </c>
      <c r="AS14" s="6">
        <v>47.2969926648311</v>
      </c>
      <c r="AT14" s="6">
        <v>45.7543824933317</v>
      </c>
      <c r="AU14" s="6">
        <v>42.0888753179144</v>
      </c>
      <c r="AV14" s="6">
        <v>2.08736532989599</v>
      </c>
      <c r="AW14" s="6">
        <v>0.0401309848886626</v>
      </c>
      <c r="AX14" s="6">
        <v>1.41163142124952</v>
      </c>
      <c r="AY14" s="6">
        <v>54.1838681671775</v>
      </c>
      <c r="AZ14" s="6">
        <v>54.5105965243404</v>
      </c>
      <c r="BA14" s="6">
        <v>57.9158263370238</v>
      </c>
      <c r="BB14" s="6">
        <v>59.8924474480396</v>
      </c>
      <c r="BC14" s="6">
        <v>56.5139532477024</v>
      </c>
      <c r="BD14" s="6">
        <v>56.0801843468893</v>
      </c>
      <c r="BE14" s="6">
        <v>41.2718702777104</v>
      </c>
      <c r="BF14" s="6">
        <v>60.6718430550415</v>
      </c>
      <c r="BG14" s="6">
        <v>3.20816144171295</v>
      </c>
      <c r="BH14" s="6">
        <v>0.49595588767238</v>
      </c>
      <c r="BI14" s="6">
        <v>1.65726449174457</v>
      </c>
      <c r="BJ14" s="6">
        <v>1.87500480075261</v>
      </c>
      <c r="BK14" s="6">
        <v>53.5703966130012</v>
      </c>
      <c r="BL14" s="6">
        <v>51.0290185070871</v>
      </c>
      <c r="BM14" s="6">
        <v>53.0906855598538</v>
      </c>
      <c r="BN14" s="6">
        <v>53.9177912589799</v>
      </c>
      <c r="BO14" s="6">
        <v>48.5085954419745</v>
      </c>
      <c r="BP14" s="6">
        <v>52.5168222661118</v>
      </c>
      <c r="BQ14" s="6">
        <v>17.580528205149</v>
      </c>
      <c r="BR14" s="6">
        <v>4.38994814382198</v>
      </c>
      <c r="BS14" s="6">
        <v>56.9467139390268</v>
      </c>
      <c r="BT14" s="6">
        <v>1.59888338255939</v>
      </c>
      <c r="BU14" s="6">
        <v>1.93366027115309</v>
      </c>
      <c r="BV14" s="6">
        <v>1.98007522868204</v>
      </c>
      <c r="BW14" s="6">
        <v>55.0604891967271</v>
      </c>
      <c r="BX14" s="6">
        <v>54.4792128405382</v>
      </c>
      <c r="BY14" s="6">
        <v>51.5340875707667</v>
      </c>
      <c r="BZ14" s="6">
        <v>59.7450148936631</v>
      </c>
      <c r="CA14" s="6">
        <v>53.3223000053824</v>
      </c>
      <c r="CB14" s="6">
        <v>52.1097563369261</v>
      </c>
      <c r="CC14" s="6">
        <v>3.09710291471725</v>
      </c>
      <c r="CD14" s="6">
        <v>4.37802674540308</v>
      </c>
      <c r="CE14" s="6">
        <v>34.996359387347</v>
      </c>
      <c r="CF14" s="6">
        <v>1.09300341505167</v>
      </c>
      <c r="CG14" s="6">
        <v>1.18487459410267</v>
      </c>
      <c r="CH14" s="6">
        <v>1.61915211776835</v>
      </c>
      <c r="CI14" s="6">
        <v>46.0017242735489</v>
      </c>
      <c r="CJ14" s="6">
        <v>51.0565662127668</v>
      </c>
      <c r="CK14" s="6">
        <v>46.9014967624427</v>
      </c>
      <c r="CL14" s="6">
        <v>51.8119593242438</v>
      </c>
      <c r="CM14" s="6">
        <v>48.7780437317156</v>
      </c>
      <c r="CN14" s="6">
        <v>46.0922118121953</v>
      </c>
      <c r="CO14" s="6">
        <v>3.32305744600313</v>
      </c>
      <c r="CP14" s="6">
        <v>18.0257102452622</v>
      </c>
      <c r="CQ14" s="6">
        <v>10.9671665387523</v>
      </c>
      <c r="CR14" s="6">
        <v>0.87168168519122</v>
      </c>
      <c r="CS14" s="6">
        <v>1.11897342537094</v>
      </c>
      <c r="CT14" s="6">
        <v>0.860506732033514</v>
      </c>
    </row>
    <row r="15" spans="2:98" ht="15" customHeight="true">
      <c r="B15" s="6">
        <v>71.5</v>
      </c>
      <c r="C15" s="6">
        <v>42.5386751691336</v>
      </c>
      <c r="D15" s="6">
        <v>30.5907020472278</v>
      </c>
      <c r="E15" s="6">
        <v>52.7189115144045</v>
      </c>
      <c r="F15" s="6">
        <v>49.0869293651072</v>
      </c>
      <c r="G15" s="6">
        <v>48.7065741223308</v>
      </c>
      <c r="H15" s="6">
        <v>44.4394996446922</v>
      </c>
      <c r="I15" s="6">
        <v>42.1109026102315</v>
      </c>
      <c r="J15" s="6">
        <v>48.2668139332081</v>
      </c>
      <c r="K15" s="6">
        <v>46.8402450651502</v>
      </c>
      <c r="L15" s="6">
        <v>1.49292021959809</v>
      </c>
      <c r="M15" s="6">
        <v>1.16244231317449</v>
      </c>
      <c r="N15" s="6">
        <v>-0.0958499661093128</v>
      </c>
      <c r="O15" s="6">
        <v>34.5546850239235</v>
      </c>
      <c r="P15" s="6">
        <v>44.2335206752903</v>
      </c>
      <c r="Q15" s="6">
        <v>50.9966072887136</v>
      </c>
      <c r="R15" s="6">
        <v>53.6874263429833</v>
      </c>
      <c r="S15" s="6">
        <v>47.9631147941807</v>
      </c>
      <c r="T15" s="6">
        <v>45.7598423632737</v>
      </c>
      <c r="U15" s="6">
        <v>49.4524628521627</v>
      </c>
      <c r="V15" s="6">
        <v>47.9430803382844</v>
      </c>
      <c r="W15" s="6">
        <v>48.8709834119251</v>
      </c>
      <c r="X15" s="6">
        <v>1.8167125570472</v>
      </c>
      <c r="Y15" s="6">
        <v>1.87961661787119</v>
      </c>
      <c r="Z15" s="6">
        <v>1.12046443082102</v>
      </c>
      <c r="AA15" s="6">
        <v>43.0192644146734</v>
      </c>
      <c r="AB15" s="6">
        <v>53.0785226635853</v>
      </c>
      <c r="AC15" s="6">
        <v>52.7482153898163</v>
      </c>
      <c r="AD15" s="6">
        <v>53.8526002549709</v>
      </c>
      <c r="AE15" s="6">
        <v>55.5158129491539</v>
      </c>
      <c r="AF15" s="6">
        <v>53.8820410605492</v>
      </c>
      <c r="AG15" s="6">
        <v>60.6485094912438</v>
      </c>
      <c r="AH15" s="6">
        <v>52.5995427421902</v>
      </c>
      <c r="AI15" s="6">
        <v>52.917794130888</v>
      </c>
      <c r="AJ15" s="6">
        <v>0.107635824547344</v>
      </c>
      <c r="AK15" s="6">
        <v>2.56461448673645</v>
      </c>
      <c r="AL15" s="6">
        <v>1.31043073821172</v>
      </c>
      <c r="AM15" s="6">
        <v>44.6058672639754</v>
      </c>
      <c r="AN15" s="6">
        <v>44.2854260312705</v>
      </c>
      <c r="AO15" s="6">
        <v>48.9283777358112</v>
      </c>
      <c r="AP15" s="6">
        <v>56.9651186355432</v>
      </c>
      <c r="AQ15" s="6">
        <v>50.47605292296</v>
      </c>
      <c r="AR15" s="6">
        <v>47.0223587394167</v>
      </c>
      <c r="AS15" s="6">
        <v>51.2461672778676</v>
      </c>
      <c r="AT15" s="6">
        <v>49.8541845089708</v>
      </c>
      <c r="AU15" s="6">
        <v>48.5593977082908</v>
      </c>
      <c r="AV15" s="6">
        <v>1.76136453803366</v>
      </c>
      <c r="AW15" s="6">
        <v>0.201348054771188</v>
      </c>
      <c r="AX15" s="6">
        <v>0.87360041522254</v>
      </c>
      <c r="AY15" s="6">
        <v>58.1475175764432</v>
      </c>
      <c r="AZ15" s="6">
        <v>58.8941875468693</v>
      </c>
      <c r="BA15" s="6">
        <v>59.776649108909</v>
      </c>
      <c r="BB15" s="6">
        <v>62.1022716372181</v>
      </c>
      <c r="BC15" s="6">
        <v>58.8475628566305</v>
      </c>
      <c r="BD15" s="6">
        <v>59.8743763306176</v>
      </c>
      <c r="BE15" s="6">
        <v>47.958531191317</v>
      </c>
      <c r="BF15" s="6">
        <v>78.5990465030945</v>
      </c>
      <c r="BG15" s="6">
        <v>3.39309095242584</v>
      </c>
      <c r="BH15" s="6">
        <v>0.381796618581689</v>
      </c>
      <c r="BI15" s="6">
        <v>1.02287097548998</v>
      </c>
      <c r="BJ15" s="6">
        <v>1.64745510099272</v>
      </c>
      <c r="BK15" s="6">
        <v>54.2076038276698</v>
      </c>
      <c r="BL15" s="6">
        <v>51.3147047741987</v>
      </c>
      <c r="BM15" s="6">
        <v>54.3548802839173</v>
      </c>
      <c r="BN15" s="6">
        <v>54.6201448185041</v>
      </c>
      <c r="BO15" s="6">
        <v>49.3583731895701</v>
      </c>
      <c r="BP15" s="6">
        <v>53.5317187948425</v>
      </c>
      <c r="BQ15" s="6">
        <v>21.9586492664613</v>
      </c>
      <c r="BR15" s="6">
        <v>4.52294753085965</v>
      </c>
      <c r="BS15" s="6">
        <v>72.5982176344931</v>
      </c>
      <c r="BT15" s="6">
        <v>1.29728802648987</v>
      </c>
      <c r="BU15" s="6">
        <v>1.03634507331236</v>
      </c>
      <c r="BV15" s="6">
        <v>1.59771979863939</v>
      </c>
      <c r="BW15" s="6">
        <v>58.5774142738426</v>
      </c>
      <c r="BX15" s="6">
        <v>55.5738645262827</v>
      </c>
      <c r="BY15" s="6">
        <v>54.652127579083</v>
      </c>
      <c r="BZ15" s="6">
        <v>63.1947117141765</v>
      </c>
      <c r="CA15" s="6">
        <v>56.6160111133457</v>
      </c>
      <c r="CB15" s="6">
        <v>53.0723656235276</v>
      </c>
      <c r="CC15" s="6">
        <v>3.74571402260204</v>
      </c>
      <c r="CD15" s="6">
        <v>5.10078578716497</v>
      </c>
      <c r="CE15" s="6">
        <v>41.271913684185</v>
      </c>
      <c r="CF15" s="6">
        <v>1.09642710097876</v>
      </c>
      <c r="CG15" s="6">
        <v>0.482367870588348</v>
      </c>
      <c r="CH15" s="6">
        <v>2.03411371926802</v>
      </c>
      <c r="CI15" s="6">
        <v>47.7328047632052</v>
      </c>
      <c r="CJ15" s="6">
        <v>52.3724951824096</v>
      </c>
      <c r="CK15" s="6">
        <v>48.3026902531917</v>
      </c>
      <c r="CL15" s="6">
        <v>53.0926565372425</v>
      </c>
      <c r="CM15" s="6">
        <v>49.7081153673398</v>
      </c>
      <c r="CN15" s="6">
        <v>47.7713209000859</v>
      </c>
      <c r="CO15" s="6">
        <v>2.88351313397561</v>
      </c>
      <c r="CP15" s="6">
        <v>18.8922013679849</v>
      </c>
      <c r="CQ15" s="6">
        <v>11.4479555388237</v>
      </c>
      <c r="CR15" s="6">
        <v>0.569030273060434</v>
      </c>
      <c r="CS15" s="6">
        <v>0.188976070679587</v>
      </c>
      <c r="CT15" s="6">
        <v>0.679801737232196</v>
      </c>
    </row>
    <row r="16" spans="2:98" ht="15" customHeight="true">
      <c r="B16" s="6">
        <v>72</v>
      </c>
      <c r="C16" s="6">
        <v>45.2156664966642</v>
      </c>
      <c r="D16" s="6">
        <v>37.6307545331101</v>
      </c>
      <c r="E16" s="6">
        <v>54.5845319177746</v>
      </c>
      <c r="F16" s="6">
        <v>54.1396733497271</v>
      </c>
      <c r="G16" s="6">
        <v>50.3410393976405</v>
      </c>
      <c r="H16" s="6">
        <v>50.9241640667281</v>
      </c>
      <c r="I16" s="6">
        <v>48.4853898831368</v>
      </c>
      <c r="J16" s="6">
        <v>51.620343144102</v>
      </c>
      <c r="K16" s="6">
        <v>52.7951792230563</v>
      </c>
      <c r="L16" s="6">
        <v>1.6965297492232</v>
      </c>
      <c r="M16" s="6">
        <v>1.02111857867538</v>
      </c>
      <c r="N16" s="6">
        <v>-0.277929443407061</v>
      </c>
      <c r="O16" s="6">
        <v>40.0203012543403</v>
      </c>
      <c r="P16" s="6">
        <v>49.1062477956491</v>
      </c>
      <c r="Q16" s="6">
        <v>51.9838421319282</v>
      </c>
      <c r="R16" s="6">
        <v>53.7850655415315</v>
      </c>
      <c r="S16" s="6">
        <v>48.4494719529662</v>
      </c>
      <c r="T16" s="6">
        <v>47.4592227323584</v>
      </c>
      <c r="U16" s="6">
        <v>50.2962833305522</v>
      </c>
      <c r="V16" s="6">
        <v>48.8688185671368</v>
      </c>
      <c r="W16" s="6">
        <v>52.2289650738066</v>
      </c>
      <c r="X16" s="6">
        <v>1.80359282799208</v>
      </c>
      <c r="Y16" s="6">
        <v>1.32571623445932</v>
      </c>
      <c r="Z16" s="6">
        <v>1.10971115350469</v>
      </c>
      <c r="AA16" s="6">
        <v>50.016799102196</v>
      </c>
      <c r="AB16" s="6">
        <v>54.1305143862627</v>
      </c>
      <c r="AC16" s="6">
        <v>58.0168101055375</v>
      </c>
      <c r="AD16" s="6">
        <v>59.726250450979</v>
      </c>
      <c r="AE16" s="6">
        <v>59.445284999364</v>
      </c>
      <c r="AF16" s="6">
        <v>55.1329795643171</v>
      </c>
      <c r="AG16" s="6">
        <v>65.5006324276546</v>
      </c>
      <c r="AH16" s="6">
        <v>57.6730763722482</v>
      </c>
      <c r="AI16" s="6">
        <v>56.7713700837484</v>
      </c>
      <c r="AJ16" s="6">
        <v>-0.0422117555343675</v>
      </c>
      <c r="AK16" s="6">
        <v>2.0169699081635</v>
      </c>
      <c r="AL16" s="6">
        <v>1.36698906456235</v>
      </c>
      <c r="AM16" s="6">
        <v>47.6193326896598</v>
      </c>
      <c r="AN16" s="6">
        <v>46.739277571819</v>
      </c>
      <c r="AO16" s="6">
        <v>49.8590889811134</v>
      </c>
      <c r="AP16" s="6">
        <v>57.1948862640736</v>
      </c>
      <c r="AQ16" s="6">
        <v>54.517944759723</v>
      </c>
      <c r="AR16" s="6">
        <v>48.7648504539318</v>
      </c>
      <c r="AS16" s="6">
        <v>53.5233495115782</v>
      </c>
      <c r="AT16" s="6">
        <v>51.7107758965574</v>
      </c>
      <c r="AU16" s="6">
        <v>52.3446292307855</v>
      </c>
      <c r="AV16" s="6">
        <v>1.25285942143927</v>
      </c>
      <c r="AW16" s="6">
        <v>0.235529727782819</v>
      </c>
      <c r="AX16" s="6">
        <v>0.581876806390937</v>
      </c>
      <c r="AY16" s="6">
        <v>59.8298420942348</v>
      </c>
      <c r="AZ16" s="6">
        <v>61.3051278311778</v>
      </c>
      <c r="BA16" s="6">
        <v>61.1171160517686</v>
      </c>
      <c r="BB16" s="6">
        <v>62.4191316187772</v>
      </c>
      <c r="BC16" s="6">
        <v>60.646128504845</v>
      </c>
      <c r="BD16" s="6">
        <v>62.0141302629075</v>
      </c>
      <c r="BE16" s="6">
        <v>52.6605842441266</v>
      </c>
      <c r="BF16" s="6">
        <v>95.6113680353456</v>
      </c>
      <c r="BG16" s="6">
        <v>3.46438444036158</v>
      </c>
      <c r="BH16" s="6">
        <v>-0.533055177662845</v>
      </c>
      <c r="BI16" s="6">
        <v>0.204589161225044</v>
      </c>
      <c r="BJ16" s="6">
        <v>1.2612157283632</v>
      </c>
      <c r="BK16" s="6">
        <v>54.3810419263932</v>
      </c>
      <c r="BL16" s="6">
        <v>51.8796261382369</v>
      </c>
      <c r="BM16" s="6">
        <v>54.754989735973</v>
      </c>
      <c r="BN16" s="6">
        <v>54.5032365903007</v>
      </c>
      <c r="BO16" s="6">
        <v>50.0080874075498</v>
      </c>
      <c r="BP16" s="6">
        <v>53.8363045532848</v>
      </c>
      <c r="BQ16" s="6">
        <v>26.0229842566417</v>
      </c>
      <c r="BR16" s="6">
        <v>4.54474452985744</v>
      </c>
      <c r="BS16" s="6">
        <v>87.2979738435656</v>
      </c>
      <c r="BT16" s="6">
        <v>1.13310114415646</v>
      </c>
      <c r="BU16" s="6">
        <v>0.369486180142417</v>
      </c>
      <c r="BV16" s="6">
        <v>1.49477245331406</v>
      </c>
      <c r="BW16" s="6">
        <v>59.4838023916797</v>
      </c>
      <c r="BX16" s="6">
        <v>55.5354581273361</v>
      </c>
      <c r="BY16" s="6">
        <v>56.9529289486472</v>
      </c>
      <c r="BZ16" s="6">
        <v>64.8956316250526</v>
      </c>
      <c r="CA16" s="6">
        <v>57.153317663246</v>
      </c>
      <c r="CB16" s="6">
        <v>52.7876150549512</v>
      </c>
      <c r="CC16" s="6">
        <v>3.61239306925682</v>
      </c>
      <c r="CD16" s="6">
        <v>5.14879879788594</v>
      </c>
      <c r="CE16" s="6">
        <v>45.9413677630487</v>
      </c>
      <c r="CF16" s="6">
        <v>2.06678613151047</v>
      </c>
      <c r="CG16" s="6">
        <v>0.514045833605678</v>
      </c>
      <c r="CH16" s="6">
        <v>1.60355230552761</v>
      </c>
      <c r="CI16" s="6">
        <v>48.2015772235558</v>
      </c>
      <c r="CJ16" s="6">
        <v>52.9728711312322</v>
      </c>
      <c r="CK16" s="6">
        <v>48.8062025614852</v>
      </c>
      <c r="CL16" s="6">
        <v>53.667685286801</v>
      </c>
      <c r="CM16" s="6">
        <v>50.199958668669</v>
      </c>
      <c r="CN16" s="6">
        <v>49.7269989886749</v>
      </c>
      <c r="CO16" s="6">
        <v>2.09402131838561</v>
      </c>
      <c r="CP16" s="6">
        <v>19.1494369112662</v>
      </c>
      <c r="CQ16" s="6">
        <v>11.2523314933955</v>
      </c>
      <c r="CR16" s="6">
        <v>-0.0639459835379626</v>
      </c>
      <c r="CS16" s="6">
        <v>-0.290629231559535</v>
      </c>
      <c r="CT16" s="6">
        <v>0.462702461523861</v>
      </c>
    </row>
    <row r="17" spans="2:98" ht="15" customHeight="true">
      <c r="B17" s="6">
        <v>72.5</v>
      </c>
      <c r="C17" s="6">
        <v>47.675310912811</v>
      </c>
      <c r="D17" s="6">
        <v>42.552686732483</v>
      </c>
      <c r="E17" s="6">
        <v>55.2676466102213</v>
      </c>
      <c r="F17" s="6">
        <v>57.5396450659526</v>
      </c>
      <c r="G17" s="6">
        <v>50.6851303342224</v>
      </c>
      <c r="H17" s="6">
        <v>54.1764079972276</v>
      </c>
      <c r="I17" s="6">
        <v>52.0565011814928</v>
      </c>
      <c r="J17" s="6">
        <v>52.7879704162979</v>
      </c>
      <c r="K17" s="6">
        <v>54.9772803218875</v>
      </c>
      <c r="L17" s="6">
        <v>1.96594820316022</v>
      </c>
      <c r="M17" s="6">
        <v>0.387026515014554</v>
      </c>
      <c r="N17" s="6">
        <v>-0.217741333663241</v>
      </c>
      <c r="O17" s="6">
        <v>43.445366059692</v>
      </c>
      <c r="P17" s="6">
        <v>51.6443592188032</v>
      </c>
      <c r="Q17" s="6">
        <v>52.1562414608516</v>
      </c>
      <c r="R17" s="6">
        <v>53.4597283207024</v>
      </c>
      <c r="S17" s="6">
        <v>49.7908100277841</v>
      </c>
      <c r="T17" s="6">
        <v>47.9551035472135</v>
      </c>
      <c r="U17" s="6">
        <v>50.9209629912407</v>
      </c>
      <c r="V17" s="6">
        <v>48.7599654856979</v>
      </c>
      <c r="W17" s="6">
        <v>53.9776605980835</v>
      </c>
      <c r="X17" s="6">
        <v>1.32393042971728</v>
      </c>
      <c r="Y17" s="6">
        <v>1.03507484105734</v>
      </c>
      <c r="Z17" s="6">
        <v>1.26026012544719</v>
      </c>
      <c r="AA17" s="6">
        <v>54.2474430032704</v>
      </c>
      <c r="AB17" s="6">
        <v>54.2353881859794</v>
      </c>
      <c r="AC17" s="6">
        <v>60.2131577009878</v>
      </c>
      <c r="AD17" s="6">
        <v>63.2423694315806</v>
      </c>
      <c r="AE17" s="6">
        <v>61.5235493354396</v>
      </c>
      <c r="AF17" s="6">
        <v>55.413082174044</v>
      </c>
      <c r="AG17" s="6">
        <v>65.6399221177053</v>
      </c>
      <c r="AH17" s="6">
        <v>59.9230272160331</v>
      </c>
      <c r="AI17" s="6">
        <v>57.6397803629464</v>
      </c>
      <c r="AJ17" s="6">
        <v>-0.521656070867891</v>
      </c>
      <c r="AK17" s="6">
        <v>1.52895055598708</v>
      </c>
      <c r="AL17" s="6">
        <v>1.43433818843908</v>
      </c>
      <c r="AM17" s="6">
        <v>49.1996340398895</v>
      </c>
      <c r="AN17" s="6">
        <v>47.6637309007622</v>
      </c>
      <c r="AO17" s="6">
        <v>50.1818382911222</v>
      </c>
      <c r="AP17" s="6">
        <v>57.242156732714</v>
      </c>
      <c r="AQ17" s="6">
        <v>55.7630894092472</v>
      </c>
      <c r="AR17" s="6">
        <v>50.3157413680931</v>
      </c>
      <c r="AS17" s="6">
        <v>54.4190918446016</v>
      </c>
      <c r="AT17" s="6">
        <v>51.9750255742945</v>
      </c>
      <c r="AU17" s="6">
        <v>52.7874371667245</v>
      </c>
      <c r="AV17" s="6">
        <v>1.13893395206964</v>
      </c>
      <c r="AW17" s="6">
        <v>0.243531719600128</v>
      </c>
      <c r="AX17" s="6">
        <v>0.141016045867786</v>
      </c>
      <c r="AY17" s="6">
        <v>60.148284395209</v>
      </c>
      <c r="AZ17" s="6">
        <v>62.9953381441606</v>
      </c>
      <c r="BA17" s="6">
        <v>61.3230847730788</v>
      </c>
      <c r="BB17" s="6">
        <v>62.1405168933011</v>
      </c>
      <c r="BC17" s="6">
        <v>61.8290047936023</v>
      </c>
      <c r="BD17" s="6">
        <v>62.4130564366965</v>
      </c>
      <c r="BE17" s="6">
        <v>54.8810874912768</v>
      </c>
      <c r="BF17" s="6">
        <v>107.771041534138</v>
      </c>
      <c r="BG17" s="6">
        <v>3.69701275618507</v>
      </c>
      <c r="BH17" s="6">
        <v>-0.781125766133186</v>
      </c>
      <c r="BI17" s="6">
        <v>-0.241215931561669</v>
      </c>
      <c r="BJ17" s="6">
        <v>0.956037937625126</v>
      </c>
      <c r="BK17" s="6">
        <v>54.2824220779363</v>
      </c>
      <c r="BL17" s="6">
        <v>52.0719314377378</v>
      </c>
      <c r="BM17" s="6">
        <v>53.9380993857561</v>
      </c>
      <c r="BN17" s="6">
        <v>53.7586229856889</v>
      </c>
      <c r="BO17" s="6">
        <v>50.3706552791238</v>
      </c>
      <c r="BP17" s="6">
        <v>54.1351408621792</v>
      </c>
      <c r="BQ17" s="6">
        <v>28.0118341754619</v>
      </c>
      <c r="BR17" s="6">
        <v>3.89185893864675</v>
      </c>
      <c r="BS17" s="6">
        <v>98.8091606899931</v>
      </c>
      <c r="BT17" s="6">
        <v>0.708079296463097</v>
      </c>
      <c r="BU17" s="6">
        <v>0.0412150893311605</v>
      </c>
      <c r="BV17" s="6">
        <v>0.413822697023591</v>
      </c>
      <c r="BW17" s="6">
        <v>59.2955901999309</v>
      </c>
      <c r="BX17" s="6">
        <v>56.7630442730048</v>
      </c>
      <c r="BY17" s="6">
        <v>57.9755669301054</v>
      </c>
      <c r="BZ17" s="6">
        <v>65.6963115992551</v>
      </c>
      <c r="CA17" s="6">
        <v>56.4878961186089</v>
      </c>
      <c r="CB17" s="6">
        <v>52.6041311157038</v>
      </c>
      <c r="CC17" s="6">
        <v>3.1034767000753</v>
      </c>
      <c r="CD17" s="6">
        <v>5.01107229898054</v>
      </c>
      <c r="CE17" s="6">
        <v>48.9468319168468</v>
      </c>
      <c r="CF17" s="6">
        <v>2.89863121529555</v>
      </c>
      <c r="CG17" s="6">
        <v>1.20344768814516</v>
      </c>
      <c r="CH17" s="6">
        <v>1.08422692467025</v>
      </c>
      <c r="CI17" s="6">
        <v>48.3740108864855</v>
      </c>
      <c r="CJ17" s="6">
        <v>53.7360922846162</v>
      </c>
      <c r="CK17" s="6">
        <v>49.1091743192268</v>
      </c>
      <c r="CL17" s="6">
        <v>53.1665688811734</v>
      </c>
      <c r="CM17" s="6">
        <v>51.0331004583726</v>
      </c>
      <c r="CN17" s="6">
        <v>52.0950399308848</v>
      </c>
      <c r="CO17" s="6">
        <v>1.91842302017091</v>
      </c>
      <c r="CP17" s="6">
        <v>18.714134183083</v>
      </c>
      <c r="CQ17" s="6">
        <v>10.7400965001759</v>
      </c>
      <c r="CR17" s="6">
        <v>0.100804357990398</v>
      </c>
      <c r="CS17" s="6">
        <v>0.323209696124024</v>
      </c>
      <c r="CT17" s="6">
        <v>0.947628459422162</v>
      </c>
    </row>
    <row r="18" spans="2:98" ht="15" customHeight="true">
      <c r="B18" s="6">
        <v>73</v>
      </c>
      <c r="C18" s="6">
        <v>48.7784991648625</v>
      </c>
      <c r="D18" s="6">
        <v>45.7532052209998</v>
      </c>
      <c r="E18" s="6">
        <v>55.6268928238594</v>
      </c>
      <c r="F18" s="6">
        <v>59.2155259570608</v>
      </c>
      <c r="G18" s="6">
        <v>49.862488562254</v>
      </c>
      <c r="H18" s="6">
        <v>55.83541750122</v>
      </c>
      <c r="I18" s="6">
        <v>54.0113381966936</v>
      </c>
      <c r="J18" s="6">
        <v>52.8446213048967</v>
      </c>
      <c r="K18" s="6">
        <v>56.2863045327238</v>
      </c>
      <c r="L18" s="6">
        <v>1.76085164341885</v>
      </c>
      <c r="M18" s="6">
        <v>-0.0895681242302544</v>
      </c>
      <c r="N18" s="6">
        <v>0.211661490148288</v>
      </c>
      <c r="O18" s="6">
        <v>45.0157832642356</v>
      </c>
      <c r="P18" s="6">
        <v>53.1407482733429</v>
      </c>
      <c r="Q18" s="6">
        <v>52.0545630531504</v>
      </c>
      <c r="R18" s="6">
        <v>53.2135839637688</v>
      </c>
      <c r="S18" s="6">
        <v>50.3051920662168</v>
      </c>
      <c r="T18" s="6">
        <v>48.5229947790219</v>
      </c>
      <c r="U18" s="6">
        <v>51.6272212034847</v>
      </c>
      <c r="V18" s="6">
        <v>48.8833163846169</v>
      </c>
      <c r="W18" s="6">
        <v>54.1968145990007</v>
      </c>
      <c r="X18" s="6">
        <v>1.01131721315397</v>
      </c>
      <c r="Y18" s="6">
        <v>1.17396818256958</v>
      </c>
      <c r="Z18" s="6">
        <v>1.16602675979857</v>
      </c>
      <c r="AA18" s="6">
        <v>56.3763886892689</v>
      </c>
      <c r="AB18" s="6">
        <v>54.2136111886937</v>
      </c>
      <c r="AC18" s="6">
        <v>61.0518080373854</v>
      </c>
      <c r="AD18" s="6">
        <v>64.5316812973264</v>
      </c>
      <c r="AE18" s="6">
        <v>62.1814494976925</v>
      </c>
      <c r="AF18" s="6">
        <v>55.1832173341509</v>
      </c>
      <c r="AG18" s="6">
        <v>65.1700586065999</v>
      </c>
      <c r="AH18" s="6">
        <v>60.300678426559</v>
      </c>
      <c r="AI18" s="6">
        <v>56.751232262644</v>
      </c>
      <c r="AJ18" s="6">
        <v>0.10399102152445</v>
      </c>
      <c r="AK18" s="6">
        <v>1.21418457273046</v>
      </c>
      <c r="AL18" s="6">
        <v>1.45862097344406</v>
      </c>
      <c r="AM18" s="6">
        <v>49.8849477966004</v>
      </c>
      <c r="AN18" s="6">
        <v>47.8591033999966</v>
      </c>
      <c r="AO18" s="6">
        <v>50.1516473338802</v>
      </c>
      <c r="AP18" s="6">
        <v>56.3803932703971</v>
      </c>
      <c r="AQ18" s="6">
        <v>54.915499483865</v>
      </c>
      <c r="AR18" s="6">
        <v>50.2127576179395</v>
      </c>
      <c r="AS18" s="6">
        <v>54.3235780832408</v>
      </c>
      <c r="AT18" s="6">
        <v>52.957421344607</v>
      </c>
      <c r="AU18" s="6">
        <v>52.9433885279468</v>
      </c>
      <c r="AV18" s="6">
        <v>1.10044187426996</v>
      </c>
      <c r="AW18" s="6">
        <v>0.912618149106436</v>
      </c>
      <c r="AX18" s="6">
        <v>0.170481365072305</v>
      </c>
      <c r="AY18" s="6">
        <v>60.8134909218298</v>
      </c>
      <c r="AZ18" s="6">
        <v>64.7140477283834</v>
      </c>
      <c r="BA18" s="6">
        <v>61.4964856408059</v>
      </c>
      <c r="BB18" s="6">
        <v>62.8247965514248</v>
      </c>
      <c r="BC18" s="6">
        <v>62.5860962801305</v>
      </c>
      <c r="BD18" s="6">
        <v>62.3111321734019</v>
      </c>
      <c r="BE18" s="6">
        <v>54.7924749859034</v>
      </c>
      <c r="BF18" s="6">
        <v>111.599359195966</v>
      </c>
      <c r="BG18" s="6">
        <v>4.2463634918505</v>
      </c>
      <c r="BH18" s="6">
        <v>0.124119869322556</v>
      </c>
      <c r="BI18" s="6">
        <v>0.0164541508027582</v>
      </c>
      <c r="BJ18" s="6">
        <v>0.777324301106376</v>
      </c>
      <c r="BK18" s="6">
        <v>53.8163219175793</v>
      </c>
      <c r="BL18" s="6">
        <v>51.9459214961596</v>
      </c>
      <c r="BM18" s="6">
        <v>53.7474282517885</v>
      </c>
      <c r="BN18" s="6">
        <v>53.1907021534616</v>
      </c>
      <c r="BO18" s="6">
        <v>50.024866855198</v>
      </c>
      <c r="BP18" s="6">
        <v>54.2122551249541</v>
      </c>
      <c r="BQ18" s="6">
        <v>28.0299315946953</v>
      </c>
      <c r="BR18" s="6">
        <v>3.4426286523809</v>
      </c>
      <c r="BS18" s="6">
        <v>103.486550898986</v>
      </c>
      <c r="BT18" s="6">
        <v>0.526407437185583</v>
      </c>
      <c r="BU18" s="6">
        <v>-0.183545725001125</v>
      </c>
      <c r="BV18" s="6">
        <v>-0.362486241795864</v>
      </c>
      <c r="BW18" s="6">
        <v>59.2564127358777</v>
      </c>
      <c r="BX18" s="6">
        <v>58.1270270039268</v>
      </c>
      <c r="BY18" s="6">
        <v>58.4791863344731</v>
      </c>
      <c r="BZ18" s="6">
        <v>65.4462022087224</v>
      </c>
      <c r="CA18" s="6">
        <v>56.5613105104361</v>
      </c>
      <c r="CB18" s="6">
        <v>53.4299306523526</v>
      </c>
      <c r="CC18" s="6">
        <v>3.30522123735472</v>
      </c>
      <c r="CD18" s="6">
        <v>4.99991502768972</v>
      </c>
      <c r="CE18" s="6">
        <v>49.8374440262569</v>
      </c>
      <c r="CF18" s="6">
        <v>2.51326342923005</v>
      </c>
      <c r="CG18" s="6">
        <v>1.24772966978594</v>
      </c>
      <c r="CH18" s="6">
        <v>1.3277840364409</v>
      </c>
      <c r="CI18" s="6">
        <v>48.4789825632099</v>
      </c>
      <c r="CJ18" s="6">
        <v>53.9539145335085</v>
      </c>
      <c r="CK18" s="6">
        <v>49.2054619503581</v>
      </c>
      <c r="CL18" s="6">
        <v>53.233841632688</v>
      </c>
      <c r="CM18" s="6">
        <v>51.1039552247347</v>
      </c>
      <c r="CN18" s="6">
        <v>54.2420892477002</v>
      </c>
      <c r="CO18" s="6">
        <v>1.83722171921124</v>
      </c>
      <c r="CP18" s="6">
        <v>19.399566138879</v>
      </c>
      <c r="CQ18" s="6">
        <v>10.2009023848142</v>
      </c>
      <c r="CR18" s="6">
        <v>0.878870265778687</v>
      </c>
      <c r="CS18" s="6">
        <v>0.459426809414595</v>
      </c>
      <c r="CT18" s="6">
        <v>0.898175098670379</v>
      </c>
    </row>
    <row r="19" spans="2:98" ht="15" customHeight="true">
      <c r="B19" s="6">
        <v>73.5</v>
      </c>
      <c r="C19" s="6">
        <v>49.1811880541092</v>
      </c>
      <c r="D19" s="6">
        <v>47.8276099953172</v>
      </c>
      <c r="E19" s="6">
        <v>56.3866469193984</v>
      </c>
      <c r="F19" s="6">
        <v>58.8619697031811</v>
      </c>
      <c r="G19" s="6">
        <v>49.5994508866372</v>
      </c>
      <c r="H19" s="6">
        <v>56.5222062303865</v>
      </c>
      <c r="I19" s="6">
        <v>55.2804510767874</v>
      </c>
      <c r="J19" s="6">
        <v>53.3177969561071</v>
      </c>
      <c r="K19" s="6">
        <v>56.7787753582461</v>
      </c>
      <c r="L19" s="6">
        <v>1.89582379491708</v>
      </c>
      <c r="M19" s="6">
        <v>0.371521699475466</v>
      </c>
      <c r="N19" s="6">
        <v>1.06334580137155</v>
      </c>
      <c r="O19" s="6">
        <v>45.7484996665306</v>
      </c>
      <c r="P19" s="6">
        <v>53.522112054434</v>
      </c>
      <c r="Q19" s="6">
        <v>51.772462989016</v>
      </c>
      <c r="R19" s="6">
        <v>52.9479610075251</v>
      </c>
      <c r="S19" s="6">
        <v>50.3715959588187</v>
      </c>
      <c r="T19" s="6">
        <v>48.9853305928302</v>
      </c>
      <c r="U19" s="6">
        <v>52.3873063356294</v>
      </c>
      <c r="V19" s="6">
        <v>49.4360125492204</v>
      </c>
      <c r="W19" s="6">
        <v>53.4518163768513</v>
      </c>
      <c r="X19" s="6">
        <v>1.08546298524215</v>
      </c>
      <c r="Y19" s="6">
        <v>1.24854886639736</v>
      </c>
      <c r="Z19" s="6">
        <v>1.09554243090037</v>
      </c>
      <c r="AA19" s="6">
        <v>57.5216840620186</v>
      </c>
      <c r="AB19" s="6">
        <v>54.3542185699272</v>
      </c>
      <c r="AC19" s="6">
        <v>61.2356560717822</v>
      </c>
      <c r="AD19" s="6">
        <v>64.29326113882</v>
      </c>
      <c r="AE19" s="6">
        <v>61.6735552824148</v>
      </c>
      <c r="AF19" s="6">
        <v>54.5882359566642</v>
      </c>
      <c r="AG19" s="6">
        <v>65.1785134291232</v>
      </c>
      <c r="AH19" s="6">
        <v>60.8264078841845</v>
      </c>
      <c r="AI19" s="6">
        <v>56.3710494247938</v>
      </c>
      <c r="AJ19" s="6">
        <v>1.28009380280838</v>
      </c>
      <c r="AK19" s="6">
        <v>1.00608186442668</v>
      </c>
      <c r="AL19" s="6">
        <v>1.4734180260711</v>
      </c>
      <c r="AM19" s="6">
        <v>49.6449987996233</v>
      </c>
      <c r="AN19" s="6">
        <v>48.7482563345445</v>
      </c>
      <c r="AO19" s="6">
        <v>49.9628443642989</v>
      </c>
      <c r="AP19" s="6">
        <v>55.4155516056217</v>
      </c>
      <c r="AQ19" s="6">
        <v>54.9170241469977</v>
      </c>
      <c r="AR19" s="6">
        <v>49.7607177370177</v>
      </c>
      <c r="AS19" s="6">
        <v>54.342081687096</v>
      </c>
      <c r="AT19" s="6">
        <v>55.138645897888</v>
      </c>
      <c r="AU19" s="6">
        <v>53.6661249279707</v>
      </c>
      <c r="AV19" s="6">
        <v>0.983617821456789</v>
      </c>
      <c r="AW19" s="6">
        <v>1.21565281720689</v>
      </c>
      <c r="AX19" s="6">
        <v>0.694991743539163</v>
      </c>
      <c r="AY19" s="6">
        <v>61.2050934297034</v>
      </c>
      <c r="AZ19" s="6">
        <v>65.6719479485822</v>
      </c>
      <c r="BA19" s="6">
        <v>62.3264600488956</v>
      </c>
      <c r="BB19" s="6">
        <v>63.5539684011691</v>
      </c>
      <c r="BC19" s="6">
        <v>63.6456463696736</v>
      </c>
      <c r="BD19" s="6">
        <v>62.0991285028466</v>
      </c>
      <c r="BE19" s="6">
        <v>52.9311376202596</v>
      </c>
      <c r="BF19" s="6">
        <v>105.785665040405</v>
      </c>
      <c r="BG19" s="6">
        <v>4.21807748367047</v>
      </c>
      <c r="BH19" s="6">
        <v>0.484099286701735</v>
      </c>
      <c r="BI19" s="6">
        <v>0.0651372997044177</v>
      </c>
      <c r="BJ19" s="6">
        <v>0.681332171098688</v>
      </c>
      <c r="BK19" s="6">
        <v>53.2921459548659</v>
      </c>
      <c r="BL19" s="6">
        <v>52.9319035529433</v>
      </c>
      <c r="BM19" s="6">
        <v>54.4461849871825</v>
      </c>
      <c r="BN19" s="6">
        <v>53.4414244685693</v>
      </c>
      <c r="BO19" s="6">
        <v>50.3424815415303</v>
      </c>
      <c r="BP19" s="6">
        <v>53.6658240751934</v>
      </c>
      <c r="BQ19" s="6">
        <v>25.1603628375939</v>
      </c>
      <c r="BR19" s="6">
        <v>3.64862306288779</v>
      </c>
      <c r="BS19" s="6">
        <v>98.3187695634572</v>
      </c>
      <c r="BT19" s="6">
        <v>0.528309483536873</v>
      </c>
      <c r="BU19" s="6">
        <v>-0.0869528487230014</v>
      </c>
      <c r="BV19" s="6">
        <v>-0.0200453579031432</v>
      </c>
      <c r="BW19" s="6">
        <v>59.2536072055273</v>
      </c>
      <c r="BX19" s="6">
        <v>58.3400619390768</v>
      </c>
      <c r="BY19" s="6">
        <v>58.8844868845431</v>
      </c>
      <c r="BZ19" s="6">
        <v>64.631259661332</v>
      </c>
      <c r="CA19" s="6">
        <v>56.9329593918394</v>
      </c>
      <c r="CB19" s="6">
        <v>54.1666400929382</v>
      </c>
      <c r="CC19" s="6">
        <v>3.43056003999806</v>
      </c>
      <c r="CD19" s="6">
        <v>5.09308284254553</v>
      </c>
      <c r="CE19" s="6">
        <v>48.427073479058</v>
      </c>
      <c r="CF19" s="6">
        <v>2.45308042845767</v>
      </c>
      <c r="CG19" s="6">
        <v>1.421763803283</v>
      </c>
      <c r="CH19" s="6">
        <v>1.18005924738532</v>
      </c>
      <c r="CI19" s="6">
        <v>47.8577875984425</v>
      </c>
      <c r="CJ19" s="6">
        <v>53.7299368164803</v>
      </c>
      <c r="CK19" s="6">
        <v>48.9408300922695</v>
      </c>
      <c r="CL19" s="6">
        <v>53.3295009823434</v>
      </c>
      <c r="CM19" s="6">
        <v>50.9143295789618</v>
      </c>
      <c r="CN19" s="6">
        <v>55.1214255479054</v>
      </c>
      <c r="CO19" s="6">
        <v>1.33429368537293</v>
      </c>
      <c r="CP19" s="6">
        <v>22.0195419243371</v>
      </c>
      <c r="CQ19" s="6">
        <v>9.97240780532081</v>
      </c>
      <c r="CR19" s="6">
        <v>1.14132586623123</v>
      </c>
      <c r="CS19" s="6">
        <v>0.358715984184641</v>
      </c>
      <c r="CT19" s="6">
        <v>0.128200840114403</v>
      </c>
    </row>
    <row r="20" spans="2:98" ht="15" customHeight="true">
      <c r="B20" s="6">
        <v>74</v>
      </c>
      <c r="C20" s="6">
        <v>50.1984071345165</v>
      </c>
      <c r="D20" s="6">
        <v>48.671338997798</v>
      </c>
      <c r="E20" s="6">
        <v>56.8033455085626</v>
      </c>
      <c r="F20" s="6">
        <v>58.0441081639017</v>
      </c>
      <c r="G20" s="6">
        <v>50.1813399860097</v>
      </c>
      <c r="H20" s="6">
        <v>56.0215799826037</v>
      </c>
      <c r="I20" s="6">
        <v>55.3209809080086</v>
      </c>
      <c r="J20" s="6">
        <v>53.6549923631914</v>
      </c>
      <c r="K20" s="6">
        <v>55.5557017232544</v>
      </c>
      <c r="L20" s="6">
        <v>2.09814857018864</v>
      </c>
      <c r="M20" s="6">
        <v>0.793426915600321</v>
      </c>
      <c r="N20" s="6">
        <v>1.66355686391614</v>
      </c>
      <c r="O20" s="6">
        <v>46.3127927786147</v>
      </c>
      <c r="P20" s="6">
        <v>53.4710718087224</v>
      </c>
      <c r="Q20" s="6">
        <v>51.8415193416532</v>
      </c>
      <c r="R20" s="6">
        <v>52.6739981725442</v>
      </c>
      <c r="S20" s="6">
        <v>51.3928260771836</v>
      </c>
      <c r="T20" s="6">
        <v>49.3677985293713</v>
      </c>
      <c r="U20" s="6">
        <v>52.610322710337</v>
      </c>
      <c r="V20" s="6">
        <v>49.5857533710632</v>
      </c>
      <c r="W20" s="6">
        <v>52.6159155162416</v>
      </c>
      <c r="X20" s="6">
        <v>0.356934867557925</v>
      </c>
      <c r="Y20" s="6">
        <v>1.28193398608994</v>
      </c>
      <c r="Z20" s="6">
        <v>0.871565838727974</v>
      </c>
      <c r="AA20" s="6">
        <v>57.3512116242454</v>
      </c>
      <c r="AB20" s="6">
        <v>55.0753716269935</v>
      </c>
      <c r="AC20" s="6">
        <v>61.3985454720937</v>
      </c>
      <c r="AD20" s="6">
        <v>63.6314902706287</v>
      </c>
      <c r="AE20" s="6">
        <v>61.170893621015</v>
      </c>
      <c r="AF20" s="6">
        <v>54.1959502491159</v>
      </c>
      <c r="AG20" s="6">
        <v>64.9832129197394</v>
      </c>
      <c r="AH20" s="6">
        <v>61.1111741573677</v>
      </c>
      <c r="AI20" s="6">
        <v>56.0520704433559</v>
      </c>
      <c r="AJ20" s="6">
        <v>1.53651099436996</v>
      </c>
      <c r="AK20" s="6">
        <v>0.527213309371689</v>
      </c>
      <c r="AL20" s="6">
        <v>1.02972499726803</v>
      </c>
      <c r="AM20" s="6">
        <v>50.1309509747806</v>
      </c>
      <c r="AN20" s="6">
        <v>49.1754979439805</v>
      </c>
      <c r="AO20" s="6">
        <v>49.8762933968497</v>
      </c>
      <c r="AP20" s="6">
        <v>55.7142363268472</v>
      </c>
      <c r="AQ20" s="6">
        <v>55.2611411172641</v>
      </c>
      <c r="AR20" s="6">
        <v>50.4501576560417</v>
      </c>
      <c r="AS20" s="6">
        <v>54.8034976486111</v>
      </c>
      <c r="AT20" s="6">
        <v>56.054856340717</v>
      </c>
      <c r="AU20" s="6">
        <v>53.105586265459</v>
      </c>
      <c r="AV20" s="6">
        <v>0.867575496442555</v>
      </c>
      <c r="AW20" s="6">
        <v>0.841052925636177</v>
      </c>
      <c r="AX20" s="6">
        <v>0.858524273285639</v>
      </c>
      <c r="AY20" s="6">
        <v>61.0076461366222</v>
      </c>
      <c r="AZ20" s="6">
        <v>65.7352304176137</v>
      </c>
      <c r="BA20" s="6">
        <v>62.436638785608</v>
      </c>
      <c r="BB20" s="6">
        <v>63.350665098811</v>
      </c>
      <c r="BC20" s="6">
        <v>64.2539800941194</v>
      </c>
      <c r="BD20" s="6">
        <v>61.6606308779144</v>
      </c>
      <c r="BE20" s="6">
        <v>52.4328493813112</v>
      </c>
      <c r="BF20" s="6">
        <v>91.2016819608776</v>
      </c>
      <c r="BG20" s="6">
        <v>3.47000222613133</v>
      </c>
      <c r="BH20" s="6">
        <v>0.524940766886743</v>
      </c>
      <c r="BI20" s="6">
        <v>0.0970907528813996</v>
      </c>
      <c r="BJ20" s="6">
        <v>0.689704695803186</v>
      </c>
      <c r="BK20" s="6">
        <v>52.9856411724179</v>
      </c>
      <c r="BL20" s="6">
        <v>53.8594102175142</v>
      </c>
      <c r="BM20" s="6">
        <v>54.6265074560853</v>
      </c>
      <c r="BN20" s="6">
        <v>53.6876773035943</v>
      </c>
      <c r="BO20" s="6">
        <v>51.1105645100849</v>
      </c>
      <c r="BP20" s="6">
        <v>53.2154072537163</v>
      </c>
      <c r="BQ20" s="6">
        <v>19.6632362290526</v>
      </c>
      <c r="BR20" s="6">
        <v>3.7246887699265</v>
      </c>
      <c r="BS20" s="6">
        <v>84.9435627696192</v>
      </c>
      <c r="BT20" s="6">
        <v>0.794065881136874</v>
      </c>
      <c r="BU20" s="6">
        <v>0.0156846808383193</v>
      </c>
      <c r="BV20" s="6">
        <v>-0.121948202397846</v>
      </c>
      <c r="BW20" s="6">
        <v>59.4082455192954</v>
      </c>
      <c r="BX20" s="6">
        <v>59.0903611571957</v>
      </c>
      <c r="BY20" s="6">
        <v>59.111790327151</v>
      </c>
      <c r="BZ20" s="6">
        <v>63.6535908787594</v>
      </c>
      <c r="CA20" s="6">
        <v>57.1822201755188</v>
      </c>
      <c r="CB20" s="6">
        <v>54.3523744728519</v>
      </c>
      <c r="CC20" s="6">
        <v>3.21920658304879</v>
      </c>
      <c r="CD20" s="6">
        <v>4.83544157257984</v>
      </c>
      <c r="CE20" s="6">
        <v>46.1577031148406</v>
      </c>
      <c r="CF20" s="6">
        <v>2.48738077137278</v>
      </c>
      <c r="CG20" s="6">
        <v>2.22914009576624</v>
      </c>
      <c r="CH20" s="6">
        <v>0.57900975189267</v>
      </c>
      <c r="CI20" s="6">
        <v>47.6972149949996</v>
      </c>
      <c r="CJ20" s="6">
        <v>53.9267819083119</v>
      </c>
      <c r="CK20" s="6">
        <v>48.6019034530601</v>
      </c>
      <c r="CL20" s="6">
        <v>52.5311244779188</v>
      </c>
      <c r="CM20" s="6">
        <v>51.2788184529752</v>
      </c>
      <c r="CN20" s="6">
        <v>54.3613197771339</v>
      </c>
      <c r="CO20" s="6">
        <v>1.41522427533283</v>
      </c>
      <c r="CP20" s="6">
        <v>26.0086320219078</v>
      </c>
      <c r="CQ20" s="6">
        <v>10.0432728352163</v>
      </c>
      <c r="CR20" s="6">
        <v>1.32650172964293</v>
      </c>
      <c r="CS20" s="6">
        <v>1.17770374560024</v>
      </c>
      <c r="CT20" s="6">
        <v>0.0392401864634166</v>
      </c>
    </row>
    <row r="21" spans="2:98" ht="15" customHeight="true">
      <c r="B21" s="6">
        <v>74.5</v>
      </c>
      <c r="C21" s="6">
        <v>50.7969428618387</v>
      </c>
      <c r="D21" s="6">
        <v>48.6960509335026</v>
      </c>
      <c r="E21" s="6">
        <v>56.1591163473765</v>
      </c>
      <c r="F21" s="6">
        <v>57.2189236829195</v>
      </c>
      <c r="G21" s="6">
        <v>50.3863714036158</v>
      </c>
      <c r="H21" s="6">
        <v>55.4304273974325</v>
      </c>
      <c r="I21" s="6">
        <v>54.7792019027414</v>
      </c>
      <c r="J21" s="6">
        <v>53.1526095587594</v>
      </c>
      <c r="K21" s="6">
        <v>54.4378874110577</v>
      </c>
      <c r="L21" s="6">
        <v>1.69874897230227</v>
      </c>
      <c r="M21" s="6">
        <v>0.865550082270943</v>
      </c>
      <c r="N21" s="6">
        <v>1.71237440122712</v>
      </c>
      <c r="O21" s="6">
        <v>46.7739885418923</v>
      </c>
      <c r="P21" s="6">
        <v>53.7076944015566</v>
      </c>
      <c r="Q21" s="6">
        <v>51.8503605047596</v>
      </c>
      <c r="R21" s="6">
        <v>52.6470089477398</v>
      </c>
      <c r="S21" s="6">
        <v>51.9620181154848</v>
      </c>
      <c r="T21" s="6">
        <v>49.9686320818066</v>
      </c>
      <c r="U21" s="6">
        <v>52.2915602633765</v>
      </c>
      <c r="V21" s="6">
        <v>49.2369951600266</v>
      </c>
      <c r="W21" s="6">
        <v>52.3068255641668</v>
      </c>
      <c r="X21" s="6">
        <v>-0.369167161696112</v>
      </c>
      <c r="Y21" s="6">
        <v>1.4641504229993</v>
      </c>
      <c r="Z21" s="6">
        <v>0.881516550641663</v>
      </c>
      <c r="AA21" s="6">
        <v>56.6527817440327</v>
      </c>
      <c r="AB21" s="6">
        <v>56.0198988299551</v>
      </c>
      <c r="AC21" s="6">
        <v>61.4565519486514</v>
      </c>
      <c r="AD21" s="6">
        <v>63.0813474780143</v>
      </c>
      <c r="AE21" s="6">
        <v>61.1354874938247</v>
      </c>
      <c r="AF21" s="6">
        <v>53.9081495573662</v>
      </c>
      <c r="AG21" s="6">
        <v>65.4372200866873</v>
      </c>
      <c r="AH21" s="6">
        <v>60.9232952119179</v>
      </c>
      <c r="AI21" s="6">
        <v>55.6785634048747</v>
      </c>
      <c r="AJ21" s="6">
        <v>1.66993799054052</v>
      </c>
      <c r="AK21" s="6">
        <v>0.146768495402227</v>
      </c>
      <c r="AL21" s="6">
        <v>0.833771451912924</v>
      </c>
      <c r="AM21" s="6">
        <v>51.3121677126813</v>
      </c>
      <c r="AN21" s="6">
        <v>48.6709991875201</v>
      </c>
      <c r="AO21" s="6">
        <v>49.9700329194721</v>
      </c>
      <c r="AP21" s="6">
        <v>56.1504459225753</v>
      </c>
      <c r="AQ21" s="6">
        <v>55.0160643779848</v>
      </c>
      <c r="AR21" s="6">
        <v>50.2126479006929</v>
      </c>
      <c r="AS21" s="6">
        <v>54.8554574762338</v>
      </c>
      <c r="AT21" s="6">
        <v>56.194694706082</v>
      </c>
      <c r="AU21" s="6">
        <v>52.9493658950763</v>
      </c>
      <c r="AV21" s="6">
        <v>0.517498014837031</v>
      </c>
      <c r="AW21" s="6">
        <v>0.777030976018068</v>
      </c>
      <c r="AX21" s="6">
        <v>0.686728307968451</v>
      </c>
      <c r="AY21" s="6">
        <v>61.2440664926821</v>
      </c>
      <c r="AZ21" s="6">
        <v>65.9156776674971</v>
      </c>
      <c r="BA21" s="6">
        <v>62.3618522723506</v>
      </c>
      <c r="BB21" s="6">
        <v>63.2353903582714</v>
      </c>
      <c r="BC21" s="6">
        <v>64.4892041469022</v>
      </c>
      <c r="BD21" s="6">
        <v>60.9980212279485</v>
      </c>
      <c r="BE21" s="6">
        <v>55.7959585502084</v>
      </c>
      <c r="BF21" s="6">
        <v>71.2249802121539</v>
      </c>
      <c r="BG21" s="6">
        <v>3.23700334138357</v>
      </c>
      <c r="BH21" s="6">
        <v>1.13798609825631</v>
      </c>
      <c r="BI21" s="6">
        <v>0.842637761313142</v>
      </c>
      <c r="BJ21" s="6">
        <v>0.652831346460346</v>
      </c>
      <c r="BK21" s="6">
        <v>52.6885581491466</v>
      </c>
      <c r="BL21" s="6">
        <v>53.6486811420486</v>
      </c>
      <c r="BM21" s="6">
        <v>55.1723206169166</v>
      </c>
      <c r="BN21" s="6">
        <v>53.5754994476816</v>
      </c>
      <c r="BO21" s="6">
        <v>50.865584305815</v>
      </c>
      <c r="BP21" s="6">
        <v>52.6634811822424</v>
      </c>
      <c r="BQ21" s="6">
        <v>14.2522882053518</v>
      </c>
      <c r="BR21" s="6">
        <v>3.38619508918197</v>
      </c>
      <c r="BS21" s="6">
        <v>67.322585205791</v>
      </c>
      <c r="BT21" s="6">
        <v>1.11012216489291</v>
      </c>
      <c r="BU21" s="6">
        <v>-0.071019074348726</v>
      </c>
      <c r="BV21" s="6">
        <v>-0.433392666210636</v>
      </c>
      <c r="BW21" s="6">
        <v>59.7904764037611</v>
      </c>
      <c r="BX21" s="6">
        <v>60.3868480085646</v>
      </c>
      <c r="BY21" s="6">
        <v>58.8260944614509</v>
      </c>
      <c r="BZ21" s="6">
        <v>62.0200650269827</v>
      </c>
      <c r="CA21" s="6">
        <v>58.1532424004167</v>
      </c>
      <c r="CB21" s="6">
        <v>54.5657713111683</v>
      </c>
      <c r="CC21" s="6">
        <v>3.38324308787838</v>
      </c>
      <c r="CD21" s="6">
        <v>4.65464342376117</v>
      </c>
      <c r="CE21" s="6">
        <v>46.4476330642985</v>
      </c>
      <c r="CF21" s="6">
        <v>1.32830374597512</v>
      </c>
      <c r="CG21" s="6">
        <v>1.85169691234626</v>
      </c>
      <c r="CH21" s="6">
        <v>0.378334445396604</v>
      </c>
      <c r="CI21" s="6">
        <v>47.8345996294801</v>
      </c>
      <c r="CJ21" s="6">
        <v>54.8869410144232</v>
      </c>
      <c r="CK21" s="6">
        <v>48.8196400432864</v>
      </c>
      <c r="CL21" s="6">
        <v>51.6818408146863</v>
      </c>
      <c r="CM21" s="6">
        <v>51.8507876911655</v>
      </c>
      <c r="CN21" s="6">
        <v>51.8255166735202</v>
      </c>
      <c r="CO21" s="6">
        <v>1.79539869860571</v>
      </c>
      <c r="CP21" s="6">
        <v>33.1592807760666</v>
      </c>
      <c r="CQ21" s="6">
        <v>9.84392445832106</v>
      </c>
      <c r="CR21" s="6">
        <v>1.3048031955758</v>
      </c>
      <c r="CS21" s="6">
        <v>1.55698266930051</v>
      </c>
      <c r="CT21" s="6">
        <v>0.438253949016769</v>
      </c>
    </row>
    <row r="22" spans="2:98" ht="15" customHeight="true">
      <c r="B22" s="6">
        <v>75</v>
      </c>
      <c r="C22" s="6">
        <v>50.0527055968764</v>
      </c>
      <c r="D22" s="6">
        <v>48.4715048691307</v>
      </c>
      <c r="E22" s="6">
        <v>55.5327418838655</v>
      </c>
      <c r="F22" s="6">
        <v>56.384976594368</v>
      </c>
      <c r="G22" s="6">
        <v>50.4023535397323</v>
      </c>
      <c r="H22" s="6">
        <v>55.6071745278628</v>
      </c>
      <c r="I22" s="6">
        <v>54.6728340476143</v>
      </c>
      <c r="J22" s="6">
        <v>53.4646594906652</v>
      </c>
      <c r="K22" s="6">
        <v>54.5427362126101</v>
      </c>
      <c r="L22" s="6">
        <v>0.638664053861987</v>
      </c>
      <c r="M22" s="6">
        <v>0.88152324844782</v>
      </c>
      <c r="N22" s="6">
        <v>1.22319624617597</v>
      </c>
      <c r="O22" s="6">
        <v>46.8876827940168</v>
      </c>
      <c r="P22" s="6">
        <v>53.9550054027197</v>
      </c>
      <c r="Q22" s="6">
        <v>51.2395597586324</v>
      </c>
      <c r="R22" s="6">
        <v>52.5439182135593</v>
      </c>
      <c r="S22" s="6">
        <v>51.3327783514691</v>
      </c>
      <c r="T22" s="6">
        <v>50.7225064847805</v>
      </c>
      <c r="U22" s="6">
        <v>51.690172311263</v>
      </c>
      <c r="V22" s="6">
        <v>49.3153316064936</v>
      </c>
      <c r="W22" s="6">
        <v>52.5048894314782</v>
      </c>
      <c r="X22" s="6">
        <v>-0.277699296302956</v>
      </c>
      <c r="Y22" s="6">
        <v>1.33530179284281</v>
      </c>
      <c r="Z22" s="6">
        <v>0.812533837899707</v>
      </c>
      <c r="AA22" s="6">
        <v>56.803212755999</v>
      </c>
      <c r="AB22" s="6">
        <v>56.9372791562997</v>
      </c>
      <c r="AC22" s="6">
        <v>61.4527513422089</v>
      </c>
      <c r="AD22" s="6">
        <v>61.8805843109042</v>
      </c>
      <c r="AE22" s="6">
        <v>60.860669772138</v>
      </c>
      <c r="AF22" s="6">
        <v>53.8792551335225</v>
      </c>
      <c r="AG22" s="6">
        <v>66.08940356161</v>
      </c>
      <c r="AH22" s="6">
        <v>61.2478070079344</v>
      </c>
      <c r="AI22" s="6">
        <v>56.442366086612</v>
      </c>
      <c r="AJ22" s="6">
        <v>1.81736599392269</v>
      </c>
      <c r="AK22" s="6">
        <v>-0.0419918054948312</v>
      </c>
      <c r="AL22" s="6">
        <v>0.728055660504026</v>
      </c>
      <c r="AM22" s="6">
        <v>51.6332221737039</v>
      </c>
      <c r="AN22" s="6">
        <v>48.8692378932795</v>
      </c>
      <c r="AO22" s="6">
        <v>50.1829420190281</v>
      </c>
      <c r="AP22" s="6">
        <v>56.3683365131169</v>
      </c>
      <c r="AQ22" s="6">
        <v>55.1467612375973</v>
      </c>
      <c r="AR22" s="6">
        <v>49.3499560259387</v>
      </c>
      <c r="AS22" s="6">
        <v>55.1023092328326</v>
      </c>
      <c r="AT22" s="6">
        <v>57.0135240591034</v>
      </c>
      <c r="AU22" s="6">
        <v>54.0377560680424</v>
      </c>
      <c r="AV22" s="6">
        <v>-0.0968889784323324</v>
      </c>
      <c r="AW22" s="6">
        <v>0.834787647309156</v>
      </c>
      <c r="AX22" s="6">
        <v>0.546841258324776</v>
      </c>
      <c r="AY22" s="6">
        <v>61.7719659267477</v>
      </c>
      <c r="AZ22" s="6">
        <v>66.0010396607838</v>
      </c>
      <c r="BA22" s="6">
        <v>62.7519110487829</v>
      </c>
      <c r="BB22" s="6">
        <v>63.5375320315835</v>
      </c>
      <c r="BC22" s="6">
        <v>64.7386918603146</v>
      </c>
      <c r="BD22" s="6">
        <v>60.8293074952668</v>
      </c>
      <c r="BE22" s="6">
        <v>62.0226519207391</v>
      </c>
      <c r="BF22" s="6">
        <v>49.8135729542971</v>
      </c>
      <c r="BG22" s="6">
        <v>2.82411740273551</v>
      </c>
      <c r="BH22" s="6">
        <v>1.07128776205877</v>
      </c>
      <c r="BI22" s="6">
        <v>1.31237598167189</v>
      </c>
      <c r="BJ22" s="6">
        <v>0.111812334408626</v>
      </c>
      <c r="BK22" s="6">
        <v>51.8554279620666</v>
      </c>
      <c r="BL22" s="6">
        <v>53.4430203868387</v>
      </c>
      <c r="BM22" s="6">
        <v>56.0844783438764</v>
      </c>
      <c r="BN22" s="6">
        <v>53.2895127331233</v>
      </c>
      <c r="BO22" s="6">
        <v>50.1381407662532</v>
      </c>
      <c r="BP22" s="6">
        <v>51.4110610586048</v>
      </c>
      <c r="BQ22" s="6">
        <v>9.28569349498502</v>
      </c>
      <c r="BR22" s="6">
        <v>3.21053659757934</v>
      </c>
      <c r="BS22" s="6">
        <v>47.6100494554496</v>
      </c>
      <c r="BT22" s="6">
        <v>0.909993703863392</v>
      </c>
      <c r="BU22" s="6">
        <v>-0.0198176392392497</v>
      </c>
      <c r="BV22" s="6">
        <v>0.284157040174762</v>
      </c>
      <c r="BW22" s="6">
        <v>59.7236919820686</v>
      </c>
      <c r="BX22" s="6">
        <v>60.5522505800212</v>
      </c>
      <c r="BY22" s="6">
        <v>58.6901058359462</v>
      </c>
      <c r="BZ22" s="6">
        <v>60.7828090775468</v>
      </c>
      <c r="CA22" s="6">
        <v>59.7544016132766</v>
      </c>
      <c r="CB22" s="6">
        <v>53.9123610850359</v>
      </c>
      <c r="CC22" s="6">
        <v>3.26211772944333</v>
      </c>
      <c r="CD22" s="6">
        <v>4.67002344700563</v>
      </c>
      <c r="CE22" s="6">
        <v>50.0378719680098</v>
      </c>
      <c r="CF22" s="6">
        <v>0.459083562514877</v>
      </c>
      <c r="CG22" s="6">
        <v>0.704497334151938</v>
      </c>
      <c r="CH22" s="6">
        <v>0.485645074741285</v>
      </c>
      <c r="CI22" s="6">
        <v>47.5935871605948</v>
      </c>
      <c r="CJ22" s="6">
        <v>55.0708856355736</v>
      </c>
      <c r="CK22" s="6">
        <v>48.9316926194371</v>
      </c>
      <c r="CL22" s="6">
        <v>51.5789932327375</v>
      </c>
      <c r="CM22" s="6">
        <v>52.3988961149291</v>
      </c>
      <c r="CN22" s="6">
        <v>47.946843945903</v>
      </c>
      <c r="CO22" s="6">
        <v>1.66321397810867</v>
      </c>
      <c r="CP22" s="6">
        <v>43.0585888997435</v>
      </c>
      <c r="CQ22" s="6">
        <v>9.27281793054169</v>
      </c>
      <c r="CR22" s="6">
        <v>0.6001337040301</v>
      </c>
      <c r="CS22" s="6">
        <v>1.03018538407127</v>
      </c>
      <c r="CT22" s="6">
        <v>-0.208479790955096</v>
      </c>
    </row>
    <row r="23" spans="2:98" ht="15" customHeight="true">
      <c r="B23" s="6">
        <v>75.5</v>
      </c>
      <c r="C23" s="6">
        <v>49.4278799402479</v>
      </c>
      <c r="D23" s="6">
        <v>47.5494844519029</v>
      </c>
      <c r="E23" s="6">
        <v>56.2405248660891</v>
      </c>
      <c r="F23" s="6">
        <v>55.1248835211181</v>
      </c>
      <c r="G23" s="6">
        <v>50.5315382606473</v>
      </c>
      <c r="H23" s="6">
        <v>55.4509506438741</v>
      </c>
      <c r="I23" s="6">
        <v>54.5303692521597</v>
      </c>
      <c r="J23" s="6">
        <v>54.2176358498399</v>
      </c>
      <c r="K23" s="6">
        <v>54.4153900624631</v>
      </c>
      <c r="L23" s="6">
        <v>-0.164479548122188</v>
      </c>
      <c r="M23" s="6">
        <v>0.375304921575548</v>
      </c>
      <c r="N23" s="6">
        <v>0.768714360511865</v>
      </c>
      <c r="O23" s="6">
        <v>46.7713737612812</v>
      </c>
      <c r="P23" s="6">
        <v>53.8076165245824</v>
      </c>
      <c r="Q23" s="6">
        <v>50.8814125267841</v>
      </c>
      <c r="R23" s="6">
        <v>51.7709436984022</v>
      </c>
      <c r="S23" s="6">
        <v>51.647806978509</v>
      </c>
      <c r="T23" s="6">
        <v>51.4960016528321</v>
      </c>
      <c r="U23" s="6">
        <v>51.0326395098139</v>
      </c>
      <c r="V23" s="6">
        <v>49.5144979451419</v>
      </c>
      <c r="W23" s="6">
        <v>52.8570078856493</v>
      </c>
      <c r="X23" s="6">
        <v>-0.200254301385087</v>
      </c>
      <c r="Y23" s="6">
        <v>0.959822447183058</v>
      </c>
      <c r="Z23" s="6">
        <v>0.562153480673487</v>
      </c>
      <c r="AA23" s="6">
        <v>56.8952806296353</v>
      </c>
      <c r="AB23" s="6">
        <v>57.0944831441374</v>
      </c>
      <c r="AC23" s="6">
        <v>61.6280347456278</v>
      </c>
      <c r="AD23" s="6">
        <v>60.2465489045657</v>
      </c>
      <c r="AE23" s="6">
        <v>60.7441062150274</v>
      </c>
      <c r="AF23" s="6">
        <v>54.6462230900714</v>
      </c>
      <c r="AG23" s="6">
        <v>66.0283687242527</v>
      </c>
      <c r="AH23" s="6">
        <v>61.2703275106235</v>
      </c>
      <c r="AI23" s="6">
        <v>57.4807674566555</v>
      </c>
      <c r="AJ23" s="6">
        <v>1.5608051363659</v>
      </c>
      <c r="AK23" s="6">
        <v>-0.203139132681315</v>
      </c>
      <c r="AL23" s="6">
        <v>0.0593081969445279</v>
      </c>
      <c r="AM23" s="6">
        <v>50.9180116457607</v>
      </c>
      <c r="AN23" s="6">
        <v>48.8981368985708</v>
      </c>
      <c r="AO23" s="6">
        <v>50.1508136077961</v>
      </c>
      <c r="AP23" s="6">
        <v>57.574343648824</v>
      </c>
      <c r="AQ23" s="6">
        <v>55.7860957518727</v>
      </c>
      <c r="AR23" s="6">
        <v>49.8117924143774</v>
      </c>
      <c r="AS23" s="6">
        <v>56.0162893627877</v>
      </c>
      <c r="AT23" s="6">
        <v>57.3397104626844</v>
      </c>
      <c r="AU23" s="6">
        <v>54.2015807387398</v>
      </c>
      <c r="AV23" s="6">
        <v>-0.469343594789336</v>
      </c>
      <c r="AW23" s="6">
        <v>0.532688513301082</v>
      </c>
      <c r="AX23" s="6">
        <v>0.299083566495597</v>
      </c>
      <c r="AY23" s="6">
        <v>62.2813468442568</v>
      </c>
      <c r="AZ23" s="6">
        <v>65.3583904259763</v>
      </c>
      <c r="BA23" s="6">
        <v>63.0005449807227</v>
      </c>
      <c r="BB23" s="6">
        <v>63.1026190588544</v>
      </c>
      <c r="BC23" s="6">
        <v>64.5931263565801</v>
      </c>
      <c r="BD23" s="6">
        <v>60.8418981986481</v>
      </c>
      <c r="BE23" s="6">
        <v>69.3546826511648</v>
      </c>
      <c r="BF23" s="6">
        <v>31.4402564093318</v>
      </c>
      <c r="BG23" s="6">
        <v>2.04884552534429</v>
      </c>
      <c r="BH23" s="6">
        <v>0.347260249946373</v>
      </c>
      <c r="BI23" s="6">
        <v>0.621698289642893</v>
      </c>
      <c r="BJ23" s="6">
        <v>-0.434365238891928</v>
      </c>
      <c r="BK23" s="6">
        <v>51.2228510524762</v>
      </c>
      <c r="BL23" s="6">
        <v>53.9007254206556</v>
      </c>
      <c r="BM23" s="6">
        <v>56.0244054876947</v>
      </c>
      <c r="BN23" s="6">
        <v>52.9087847408011</v>
      </c>
      <c r="BO23" s="6">
        <v>49.2705799003737</v>
      </c>
      <c r="BP23" s="6">
        <v>50.2720392882955</v>
      </c>
      <c r="BQ23" s="6">
        <v>4.94202722658173</v>
      </c>
      <c r="BR23" s="6">
        <v>3.09973417494945</v>
      </c>
      <c r="BS23" s="6">
        <v>30.0128898493796</v>
      </c>
      <c r="BT23" s="6">
        <v>0.451930735957944</v>
      </c>
      <c r="BU23" s="6">
        <v>0.552916354795172</v>
      </c>
      <c r="BV23" s="6">
        <v>0.387507985812249</v>
      </c>
      <c r="BW23" s="6">
        <v>59.4446572436696</v>
      </c>
      <c r="BX23" s="6">
        <v>60.6408710892157</v>
      </c>
      <c r="BY23" s="6">
        <v>59.0031084697808</v>
      </c>
      <c r="BZ23" s="6">
        <v>60.1024472430596</v>
      </c>
      <c r="CA23" s="6">
        <v>60.8338173847794</v>
      </c>
      <c r="CB23" s="6">
        <v>52.9624507060587</v>
      </c>
      <c r="CC23" s="6">
        <v>2.65377768355421</v>
      </c>
      <c r="CD23" s="6">
        <v>4.80576777362762</v>
      </c>
      <c r="CE23" s="6">
        <v>55.1176231081324</v>
      </c>
      <c r="CF23" s="6">
        <v>0.385387343374703</v>
      </c>
      <c r="CG23" s="6">
        <v>0.390951518011775</v>
      </c>
      <c r="CH23" s="6">
        <v>0.599734586349257</v>
      </c>
      <c r="CI23" s="6">
        <v>47.8649739665865</v>
      </c>
      <c r="CJ23" s="6">
        <v>55.1851454301074</v>
      </c>
      <c r="CK23" s="6">
        <v>48.8149440878918</v>
      </c>
      <c r="CL23" s="6">
        <v>50.9955017918337</v>
      </c>
      <c r="CM23" s="6">
        <v>53.3363552202991</v>
      </c>
      <c r="CN23" s="6">
        <v>44.1075517343393</v>
      </c>
      <c r="CO23" s="6">
        <v>1.28970645069876</v>
      </c>
      <c r="CP23" s="6">
        <v>52.4990067628825</v>
      </c>
      <c r="CQ23" s="6">
        <v>9.26657640930205</v>
      </c>
      <c r="CR23" s="6">
        <v>0.479644349205614</v>
      </c>
      <c r="CS23" s="6">
        <v>0.975019397195979</v>
      </c>
      <c r="CT23" s="6">
        <v>-0.0540366911386059</v>
      </c>
    </row>
    <row r="24" spans="2:98" ht="15" customHeight="true">
      <c r="B24" s="6">
        <v>76</v>
      </c>
      <c r="C24" s="6">
        <v>49.3846108001446</v>
      </c>
      <c r="D24" s="6">
        <v>46.5108775186073</v>
      </c>
      <c r="E24" s="6">
        <v>56.4856160286481</v>
      </c>
      <c r="F24" s="6">
        <v>54.0830511267687</v>
      </c>
      <c r="G24" s="6">
        <v>50.5408352439704</v>
      </c>
      <c r="H24" s="6">
        <v>55.9342515982943</v>
      </c>
      <c r="I24" s="6">
        <v>54.0146723149761</v>
      </c>
      <c r="J24" s="6">
        <v>53.5414496425868</v>
      </c>
      <c r="K24" s="6">
        <v>54.4997204211214</v>
      </c>
      <c r="L24" s="6">
        <v>-0.784562502748486</v>
      </c>
      <c r="M24" s="6">
        <v>-0.391848619541975</v>
      </c>
      <c r="N24" s="6">
        <v>-0.190966432953871</v>
      </c>
      <c r="O24" s="6">
        <v>46.8912346614569</v>
      </c>
      <c r="P24" s="6">
        <v>53.9064868820606</v>
      </c>
      <c r="Q24" s="6">
        <v>50.5027619735795</v>
      </c>
      <c r="R24" s="6">
        <v>50.9914382904946</v>
      </c>
      <c r="S24" s="6">
        <v>52.2261520635403</v>
      </c>
      <c r="T24" s="6">
        <v>52.1651127308775</v>
      </c>
      <c r="U24" s="6">
        <v>50.600597681835</v>
      </c>
      <c r="V24" s="6">
        <v>49.4977783383356</v>
      </c>
      <c r="W24" s="6">
        <v>53.993327743047</v>
      </c>
      <c r="X24" s="6">
        <v>-0.798662555052147</v>
      </c>
      <c r="Y24" s="6">
        <v>0.654096589214703</v>
      </c>
      <c r="Z24" s="6">
        <v>0.315446302670807</v>
      </c>
      <c r="AA24" s="6">
        <v>56.4176248892678</v>
      </c>
      <c r="AB24" s="6">
        <v>56.5080604790848</v>
      </c>
      <c r="AC24" s="6">
        <v>61.6846428355249</v>
      </c>
      <c r="AD24" s="6">
        <v>59.3914140522984</v>
      </c>
      <c r="AE24" s="6">
        <v>61.3799995797526</v>
      </c>
      <c r="AF24" s="6">
        <v>56.3802626384975</v>
      </c>
      <c r="AG24" s="6">
        <v>66.0793795312528</v>
      </c>
      <c r="AH24" s="6">
        <v>60.6386775949011</v>
      </c>
      <c r="AI24" s="6">
        <v>57.5349754066815</v>
      </c>
      <c r="AJ24" s="6">
        <v>1.23276665320299</v>
      </c>
      <c r="AK24" s="6">
        <v>-0.52097959375169</v>
      </c>
      <c r="AL24" s="6">
        <v>-0.448792142683999</v>
      </c>
      <c r="AM24" s="6">
        <v>50.438159488629</v>
      </c>
      <c r="AN24" s="6">
        <v>48.2148002761476</v>
      </c>
      <c r="AO24" s="6">
        <v>50.5459024363744</v>
      </c>
      <c r="AP24" s="6">
        <v>58.9065196797959</v>
      </c>
      <c r="AQ24" s="6">
        <v>55.8918549727301</v>
      </c>
      <c r="AR24" s="6">
        <v>50.4580993007808</v>
      </c>
      <c r="AS24" s="6">
        <v>56.9203469678263</v>
      </c>
      <c r="AT24" s="6">
        <v>56.6042302056596</v>
      </c>
      <c r="AU24" s="6">
        <v>54.2777828771995</v>
      </c>
      <c r="AV24" s="6">
        <v>-0.544120318636999</v>
      </c>
      <c r="AW24" s="6">
        <v>0.0507158615808976</v>
      </c>
      <c r="AX24" s="6">
        <v>-0.137423067936766</v>
      </c>
      <c r="AY24" s="6">
        <v>62.4084087497869</v>
      </c>
      <c r="AZ24" s="6">
        <v>64.7590150237627</v>
      </c>
      <c r="BA24" s="6">
        <v>62.757401995268</v>
      </c>
      <c r="BB24" s="6">
        <v>61.6195972365278</v>
      </c>
      <c r="BC24" s="6">
        <v>63.6898552706072</v>
      </c>
      <c r="BD24" s="6">
        <v>60.9519317063884</v>
      </c>
      <c r="BE24" s="6">
        <v>75.039744891105</v>
      </c>
      <c r="BF24" s="6">
        <v>18.6237531135729</v>
      </c>
      <c r="BG24" s="6">
        <v>2.24157475642534</v>
      </c>
      <c r="BH24" s="6">
        <v>0.233998472068947</v>
      </c>
      <c r="BI24" s="6">
        <v>0.361129831106723</v>
      </c>
      <c r="BJ24" s="6">
        <v>-0.511127390160596</v>
      </c>
      <c r="BK24" s="6">
        <v>51.3887010154878</v>
      </c>
      <c r="BL24" s="6">
        <v>53.7932243290927</v>
      </c>
      <c r="BM24" s="6">
        <v>55.276088799772</v>
      </c>
      <c r="BN24" s="6">
        <v>52.0636859275164</v>
      </c>
      <c r="BO24" s="6">
        <v>47.8674310636504</v>
      </c>
      <c r="BP24" s="6">
        <v>49.828737749934</v>
      </c>
      <c r="BQ24" s="6">
        <v>2.92719705207634</v>
      </c>
      <c r="BR24" s="6">
        <v>2.28935944231313</v>
      </c>
      <c r="BS24" s="6">
        <v>17.8439213371707</v>
      </c>
      <c r="BT24" s="6">
        <v>0.361998486260234</v>
      </c>
      <c r="BU24" s="6">
        <v>0.815695723597798</v>
      </c>
      <c r="BV24" s="6">
        <v>-0.0930745402420712</v>
      </c>
      <c r="BW24" s="6">
        <v>58.6834182235455</v>
      </c>
      <c r="BX24" s="6">
        <v>61.5097268379582</v>
      </c>
      <c r="BY24" s="6">
        <v>59.4182866574489</v>
      </c>
      <c r="BZ24" s="6">
        <v>59.9213087589137</v>
      </c>
      <c r="CA24" s="6">
        <v>61.2338354762688</v>
      </c>
      <c r="CB24" s="6">
        <v>52.3883990640371</v>
      </c>
      <c r="CC24" s="6">
        <v>1.90324957698971</v>
      </c>
      <c r="CD24" s="6">
        <v>4.52826398855507</v>
      </c>
      <c r="CE24" s="6">
        <v>59.7740634185218</v>
      </c>
      <c r="CF24" s="6">
        <v>-0.0268031072598092</v>
      </c>
      <c r="CG24" s="6">
        <v>0.133107669714377</v>
      </c>
      <c r="CH24" s="6">
        <v>0.23933057660463</v>
      </c>
      <c r="CI24" s="6">
        <v>48.670141800892</v>
      </c>
      <c r="CJ24" s="6">
        <v>55.8198669467694</v>
      </c>
      <c r="CK24" s="6">
        <v>49.3645601249923</v>
      </c>
      <c r="CL24" s="6">
        <v>50.1251157949744</v>
      </c>
      <c r="CM24" s="6">
        <v>53.6411282237637</v>
      </c>
      <c r="CN24" s="6">
        <v>40.1673867697065</v>
      </c>
      <c r="CO24" s="6">
        <v>1.15360167383244</v>
      </c>
      <c r="CP24" s="6">
        <v>59.0785968916825</v>
      </c>
      <c r="CQ24" s="6">
        <v>9.05430797760579</v>
      </c>
      <c r="CR24" s="6">
        <v>0.606123728078046</v>
      </c>
      <c r="CS24" s="6">
        <v>1.07274081919707</v>
      </c>
      <c r="CT24" s="6">
        <v>1.08395085775049</v>
      </c>
    </row>
    <row r="25" spans="2:98" ht="15" customHeight="true">
      <c r="B25" s="6">
        <v>76.5</v>
      </c>
      <c r="C25" s="6">
        <v>49.2926534983088</v>
      </c>
      <c r="D25" s="6">
        <v>46.0861577799533</v>
      </c>
      <c r="E25" s="6">
        <v>56.0288760937577</v>
      </c>
      <c r="F25" s="6">
        <v>53.897451735104</v>
      </c>
      <c r="G25" s="6">
        <v>50.1990054230768</v>
      </c>
      <c r="H25" s="6">
        <v>57.2227772828716</v>
      </c>
      <c r="I25" s="6">
        <v>53.8206555874732</v>
      </c>
      <c r="J25" s="6">
        <v>52.9147602067195</v>
      </c>
      <c r="K25" s="6">
        <v>55.1855031136819</v>
      </c>
      <c r="L25" s="6">
        <v>-1.33699422011011</v>
      </c>
      <c r="M25" s="6">
        <v>-0.614318053424426</v>
      </c>
      <c r="N25" s="6">
        <v>-0.554896606231864</v>
      </c>
      <c r="O25" s="6">
        <v>46.8794784809813</v>
      </c>
      <c r="P25" s="6">
        <v>54.127741212836</v>
      </c>
      <c r="Q25" s="6">
        <v>49.436606581972</v>
      </c>
      <c r="R25" s="6">
        <v>50.8560719252288</v>
      </c>
      <c r="S25" s="6">
        <v>52.0023466581453</v>
      </c>
      <c r="T25" s="6">
        <v>52.3166525902149</v>
      </c>
      <c r="U25" s="6">
        <v>50.6594824638252</v>
      </c>
      <c r="V25" s="6">
        <v>49.7181900914228</v>
      </c>
      <c r="W25" s="6">
        <v>56.0653277438562</v>
      </c>
      <c r="X25" s="6">
        <v>-0.374446767112033</v>
      </c>
      <c r="Y25" s="6">
        <v>0.780656741140717</v>
      </c>
      <c r="Z25" s="6">
        <v>0.595125893725424</v>
      </c>
      <c r="AA25" s="6">
        <v>56.5980697437925</v>
      </c>
      <c r="AB25" s="6">
        <v>55.8450261250773</v>
      </c>
      <c r="AC25" s="6">
        <v>61.4919322415046</v>
      </c>
      <c r="AD25" s="6">
        <v>59.149995306659</v>
      </c>
      <c r="AE25" s="6">
        <v>61.8008190010956</v>
      </c>
      <c r="AF25" s="6">
        <v>58.3867611465463</v>
      </c>
      <c r="AG25" s="6">
        <v>66.1954860108326</v>
      </c>
      <c r="AH25" s="6">
        <v>60.7905130632674</v>
      </c>
      <c r="AI25" s="6">
        <v>57.8923767901124</v>
      </c>
      <c r="AJ25" s="6">
        <v>1.47367487405228</v>
      </c>
      <c r="AK25" s="6">
        <v>-0.287235119784384</v>
      </c>
      <c r="AL25" s="6">
        <v>-0.286512747838913</v>
      </c>
      <c r="AM25" s="6">
        <v>49.7417934289382</v>
      </c>
      <c r="AN25" s="6">
        <v>48.8520925370684</v>
      </c>
      <c r="AO25" s="6">
        <v>51.189272615652</v>
      </c>
      <c r="AP25" s="6">
        <v>59.0714560517647</v>
      </c>
      <c r="AQ25" s="6">
        <v>55.7891041842374</v>
      </c>
      <c r="AR25" s="6">
        <v>50.2228492299417</v>
      </c>
      <c r="AS25" s="6">
        <v>57.47909063551</v>
      </c>
      <c r="AT25" s="6">
        <v>56.8109961134254</v>
      </c>
      <c r="AU25" s="6">
        <v>55.6182738238447</v>
      </c>
      <c r="AV25" s="6">
        <v>-0.624210150948045</v>
      </c>
      <c r="AW25" s="6">
        <v>0.00299494258001687</v>
      </c>
      <c r="AX25" s="6">
        <v>-0.527153147499519</v>
      </c>
      <c r="AY25" s="6">
        <v>62.8434878583225</v>
      </c>
      <c r="AZ25" s="6">
        <v>64.033921150821</v>
      </c>
      <c r="BA25" s="6">
        <v>63.4485532447541</v>
      </c>
      <c r="BB25" s="6">
        <v>60.7601126964474</v>
      </c>
      <c r="BC25" s="6">
        <v>62.3866433881548</v>
      </c>
      <c r="BD25" s="6">
        <v>60.9706744758206</v>
      </c>
      <c r="BE25" s="6">
        <v>74.4495134835722</v>
      </c>
      <c r="BF25" s="6">
        <v>10.9667945191687</v>
      </c>
      <c r="BG25" s="6">
        <v>2.69470147474158</v>
      </c>
      <c r="BH25" s="6">
        <v>0.327604922414025</v>
      </c>
      <c r="BI25" s="6">
        <v>1.06548368476507</v>
      </c>
      <c r="BJ25" s="6">
        <v>-0.355903598481461</v>
      </c>
      <c r="BK25" s="6">
        <v>51.4614897240101</v>
      </c>
      <c r="BL25" s="6">
        <v>53.8552721767759</v>
      </c>
      <c r="BM25" s="6">
        <v>54.3362554431698</v>
      </c>
      <c r="BN25" s="6">
        <v>51.2732851277231</v>
      </c>
      <c r="BO25" s="6">
        <v>46.830816242719</v>
      </c>
      <c r="BP25" s="6">
        <v>49.6347272301581</v>
      </c>
      <c r="BQ25" s="6">
        <v>2.55719525595418</v>
      </c>
      <c r="BR25" s="6">
        <v>1.59987899736996</v>
      </c>
      <c r="BS25" s="6">
        <v>10.2660660636111</v>
      </c>
      <c r="BT25" s="6">
        <v>0.264609383550351</v>
      </c>
      <c r="BU25" s="6">
        <v>0.998364991265419</v>
      </c>
      <c r="BV25" s="6">
        <v>-0.206701484218343</v>
      </c>
      <c r="BW25" s="6">
        <v>57.9244699785214</v>
      </c>
      <c r="BX25" s="6">
        <v>61.8947490982405</v>
      </c>
      <c r="BY25" s="6">
        <v>60.147590794276</v>
      </c>
      <c r="BZ25" s="6">
        <v>60.2917854672374</v>
      </c>
      <c r="CA25" s="6">
        <v>61.0575509244909</v>
      </c>
      <c r="CB25" s="6">
        <v>51.8041892917433</v>
      </c>
      <c r="CC25" s="6">
        <v>1.34310364449266</v>
      </c>
      <c r="CD25" s="6">
        <v>4.53861925613535</v>
      </c>
      <c r="CE25" s="6">
        <v>61.85207245054</v>
      </c>
      <c r="CF25" s="6">
        <v>-0.353790169651177</v>
      </c>
      <c r="CG25" s="6">
        <v>-0.650502271544269</v>
      </c>
      <c r="CH25" s="6">
        <v>-0.00417075356318719</v>
      </c>
      <c r="CI25" s="6">
        <v>49.2432211987157</v>
      </c>
      <c r="CJ25" s="6">
        <v>56.1262689744721</v>
      </c>
      <c r="CK25" s="6">
        <v>49.4533734925425</v>
      </c>
      <c r="CL25" s="6">
        <v>50.0853575790136</v>
      </c>
      <c r="CM25" s="6">
        <v>53.1969328721338</v>
      </c>
      <c r="CN25" s="6">
        <v>36.9546458681828</v>
      </c>
      <c r="CO25" s="6">
        <v>0.995847641490172</v>
      </c>
      <c r="CP25" s="6">
        <v>61.1118567473422</v>
      </c>
      <c r="CQ25" s="6">
        <v>8.39084890459742</v>
      </c>
      <c r="CR25" s="6">
        <v>0.531847675053484</v>
      </c>
      <c r="CS25" s="6">
        <v>1.15621993695072</v>
      </c>
      <c r="CT25" s="6">
        <v>1.25617446926697</v>
      </c>
    </row>
    <row r="26" spans="2:98" ht="15" customHeight="true">
      <c r="B26" s="6">
        <v>77</v>
      </c>
      <c r="C26" s="6">
        <v>49.7429743119988</v>
      </c>
      <c r="D26" s="6">
        <v>45.9628813715836</v>
      </c>
      <c r="E26" s="6">
        <v>56.6624649601483</v>
      </c>
      <c r="F26" s="6">
        <v>54.1034015614232</v>
      </c>
      <c r="G26" s="6">
        <v>50.6463392021631</v>
      </c>
      <c r="H26" s="6">
        <v>58.3401767915409</v>
      </c>
      <c r="I26" s="6">
        <v>54.7340102943759</v>
      </c>
      <c r="J26" s="6">
        <v>53.383548793923</v>
      </c>
      <c r="K26" s="6">
        <v>56.1608566051586</v>
      </c>
      <c r="L26" s="6">
        <v>-1.18715511931168</v>
      </c>
      <c r="M26" s="6">
        <v>-0.469560879373375</v>
      </c>
      <c r="N26" s="6">
        <v>0.112645818193073</v>
      </c>
      <c r="O26" s="6">
        <v>46.674174541694</v>
      </c>
      <c r="P26" s="6">
        <v>54.2158747561857</v>
      </c>
      <c r="Q26" s="6">
        <v>49.31539593426</v>
      </c>
      <c r="R26" s="6">
        <v>51.2294534216235</v>
      </c>
      <c r="S26" s="6">
        <v>52.2971409680249</v>
      </c>
      <c r="T26" s="6">
        <v>53.0116004630252</v>
      </c>
      <c r="U26" s="6">
        <v>51.3048446727839</v>
      </c>
      <c r="V26" s="6">
        <v>50.3746514558757</v>
      </c>
      <c r="W26" s="6">
        <v>57.0885652745994</v>
      </c>
      <c r="X26" s="6">
        <v>0.419428830599941</v>
      </c>
      <c r="Y26" s="6">
        <v>0.824329467801306</v>
      </c>
      <c r="Z26" s="6">
        <v>0.388695465823218</v>
      </c>
      <c r="AA26" s="6">
        <v>57.1278699284579</v>
      </c>
      <c r="AB26" s="6">
        <v>55.6008311728366</v>
      </c>
      <c r="AC26" s="6">
        <v>61.145985808335</v>
      </c>
      <c r="AD26" s="6">
        <v>58.7121730813819</v>
      </c>
      <c r="AE26" s="6">
        <v>62.10303865667</v>
      </c>
      <c r="AF26" s="6">
        <v>60.0441331351067</v>
      </c>
      <c r="AG26" s="6">
        <v>65.8597959715319</v>
      </c>
      <c r="AH26" s="6">
        <v>61.809875178279</v>
      </c>
      <c r="AI26" s="6">
        <v>58.626168659289</v>
      </c>
      <c r="AJ26" s="6">
        <v>1.46583846165476</v>
      </c>
      <c r="AK26" s="6">
        <v>0.234336050216939</v>
      </c>
      <c r="AL26" s="6">
        <v>-0.0329027387707015</v>
      </c>
      <c r="AM26" s="6">
        <v>48.6598567676757</v>
      </c>
      <c r="AN26" s="6">
        <v>50.3889630917317</v>
      </c>
      <c r="AO26" s="6">
        <v>51.7381381101616</v>
      </c>
      <c r="AP26" s="6">
        <v>59.0365241574835</v>
      </c>
      <c r="AQ26" s="6">
        <v>56.0736311438625</v>
      </c>
      <c r="AR26" s="6">
        <v>51.1755391218459</v>
      </c>
      <c r="AS26" s="6">
        <v>58.5076131337212</v>
      </c>
      <c r="AT26" s="6">
        <v>58.188570504904</v>
      </c>
      <c r="AU26" s="6">
        <v>56.2059001283053</v>
      </c>
      <c r="AV26" s="6">
        <v>-0.163878742273084</v>
      </c>
      <c r="AW26" s="6">
        <v>0.243359314225643</v>
      </c>
      <c r="AX26" s="6">
        <v>-0.161661725088834</v>
      </c>
      <c r="AY26" s="6">
        <v>63.2346619000488</v>
      </c>
      <c r="AZ26" s="6">
        <v>63.2735591444862</v>
      </c>
      <c r="BA26" s="6">
        <v>64.4445070095462</v>
      </c>
      <c r="BB26" s="6">
        <v>61.1360452473031</v>
      </c>
      <c r="BC26" s="6">
        <v>61.1803981366543</v>
      </c>
      <c r="BD26" s="6">
        <v>60.9218773921805</v>
      </c>
      <c r="BE26" s="6">
        <v>65.7043358485746</v>
      </c>
      <c r="BF26" s="6">
        <v>7.10448039413086</v>
      </c>
      <c r="BG26" s="6">
        <v>2.88275144423511</v>
      </c>
      <c r="BH26" s="6">
        <v>0.179358573700426</v>
      </c>
      <c r="BI26" s="6">
        <v>1.08279563477384</v>
      </c>
      <c r="BJ26" s="6">
        <v>-0.223410630562569</v>
      </c>
      <c r="BK26" s="6">
        <v>51.5442536438528</v>
      </c>
      <c r="BL26" s="6">
        <v>54.9073003436331</v>
      </c>
      <c r="BM26" s="6">
        <v>53.1693430854193</v>
      </c>
      <c r="BN26" s="6">
        <v>51.0768300326675</v>
      </c>
      <c r="BO26" s="6">
        <v>46.8115051363431</v>
      </c>
      <c r="BP26" s="6">
        <v>49.7905521661145</v>
      </c>
      <c r="BQ26" s="6">
        <v>2.31606319241672</v>
      </c>
      <c r="BR26" s="6">
        <v>2.18889682138325</v>
      </c>
      <c r="BS26" s="6">
        <v>5.88167797936995</v>
      </c>
      <c r="BT26" s="6">
        <v>0.153279877377258</v>
      </c>
      <c r="BU26" s="6">
        <v>1.45382306898165</v>
      </c>
      <c r="BV26" s="6">
        <v>0.0177507848982827</v>
      </c>
      <c r="BW26" s="6">
        <v>57.4176937342207</v>
      </c>
      <c r="BX26" s="6">
        <v>62.1646455844323</v>
      </c>
      <c r="BY26" s="6">
        <v>60.905659395504</v>
      </c>
      <c r="BZ26" s="6">
        <v>61.3964945399047</v>
      </c>
      <c r="CA26" s="6">
        <v>60.5886888799905</v>
      </c>
      <c r="CB26" s="6">
        <v>51.6984110376291</v>
      </c>
      <c r="CC26" s="6">
        <v>0.907935944141343</v>
      </c>
      <c r="CD26" s="6">
        <v>4.9536211639653</v>
      </c>
      <c r="CE26" s="6">
        <v>58.266706502599</v>
      </c>
      <c r="CF26" s="6">
        <v>0.191494211847271</v>
      </c>
      <c r="CG26" s="6">
        <v>-0.555502470537931</v>
      </c>
      <c r="CH26" s="6">
        <v>0.11447272229691</v>
      </c>
      <c r="CI26" s="6">
        <v>49.8519759523846</v>
      </c>
      <c r="CJ26" s="6">
        <v>55.6242504560574</v>
      </c>
      <c r="CK26" s="6">
        <v>48.8024305283002</v>
      </c>
      <c r="CL26" s="6">
        <v>50.2117818891644</v>
      </c>
      <c r="CM26" s="6">
        <v>52.9557949531768</v>
      </c>
      <c r="CN26" s="6">
        <v>35.4833602887765</v>
      </c>
      <c r="CO26" s="6">
        <v>0.708503928716994</v>
      </c>
      <c r="CP26" s="6">
        <v>56.6040482242814</v>
      </c>
      <c r="CQ26" s="6">
        <v>8.64764201747192</v>
      </c>
      <c r="CR26" s="6">
        <v>0.869440597843038</v>
      </c>
      <c r="CS26" s="6">
        <v>1.4190403619566</v>
      </c>
      <c r="CT26" s="6">
        <v>1.12938424834454</v>
      </c>
    </row>
    <row r="27" spans="2:98" ht="15" customHeight="true">
      <c r="B27" s="6">
        <v>77.5</v>
      </c>
      <c r="C27" s="6">
        <v>50.8613081759498</v>
      </c>
      <c r="D27" s="6">
        <v>46.6557075795532</v>
      </c>
      <c r="E27" s="6">
        <v>57.5312861227441</v>
      </c>
      <c r="F27" s="6">
        <v>53.8970347364574</v>
      </c>
      <c r="G27" s="6">
        <v>52.3761936822358</v>
      </c>
      <c r="H27" s="6">
        <v>59.1533801990548</v>
      </c>
      <c r="I27" s="6">
        <v>55.7468933962828</v>
      </c>
      <c r="J27" s="6">
        <v>53.7638557973016</v>
      </c>
      <c r="K27" s="6">
        <v>57.0894823692759</v>
      </c>
      <c r="L27" s="6">
        <v>-0.0562677331552095</v>
      </c>
      <c r="M27" s="6">
        <v>-0.218557511881045</v>
      </c>
      <c r="N27" s="6">
        <v>0.543826712946213</v>
      </c>
      <c r="O27" s="6">
        <v>47.3747355562984</v>
      </c>
      <c r="P27" s="6">
        <v>54.6090899857003</v>
      </c>
      <c r="Q27" s="6">
        <v>50.1393534312766</v>
      </c>
      <c r="R27" s="6">
        <v>51.9161019217469</v>
      </c>
      <c r="S27" s="6">
        <v>53.0250951466563</v>
      </c>
      <c r="T27" s="6">
        <v>54.1355612375642</v>
      </c>
      <c r="U27" s="6">
        <v>52.4096554859444</v>
      </c>
      <c r="V27" s="6">
        <v>51.2512548462297</v>
      </c>
      <c r="W27" s="6">
        <v>56.9414285414101</v>
      </c>
      <c r="X27" s="6">
        <v>0.61894802723458</v>
      </c>
      <c r="Y27" s="6">
        <v>0.719924885349314</v>
      </c>
      <c r="Z27" s="6">
        <v>0.232204994654637</v>
      </c>
      <c r="AA27" s="6">
        <v>57.1940725446751</v>
      </c>
      <c r="AB27" s="6">
        <v>55.3615270319796</v>
      </c>
      <c r="AC27" s="6">
        <v>61.6332842719005</v>
      </c>
      <c r="AD27" s="6">
        <v>58.8437710917465</v>
      </c>
      <c r="AE27" s="6">
        <v>62.8882422972167</v>
      </c>
      <c r="AF27" s="6">
        <v>61.3198133016485</v>
      </c>
      <c r="AG27" s="6">
        <v>65.7311551430685</v>
      </c>
      <c r="AH27" s="6">
        <v>63.0005854511437</v>
      </c>
      <c r="AI27" s="6">
        <v>58.5829223555766</v>
      </c>
      <c r="AJ27" s="6">
        <v>1.27223717544706</v>
      </c>
      <c r="AK27" s="6">
        <v>0.390212132575868</v>
      </c>
      <c r="AL27" s="6">
        <v>0.3633452123089</v>
      </c>
      <c r="AM27" s="6">
        <v>47.9796345102881</v>
      </c>
      <c r="AN27" s="6">
        <v>51.71340573886</v>
      </c>
      <c r="AO27" s="6">
        <v>52.4570322351697</v>
      </c>
      <c r="AP27" s="6">
        <v>59.2955881766508</v>
      </c>
      <c r="AQ27" s="6">
        <v>56.7480004155518</v>
      </c>
      <c r="AR27" s="6">
        <v>52.8746230787234</v>
      </c>
      <c r="AS27" s="6">
        <v>59.603837215058</v>
      </c>
      <c r="AT27" s="6">
        <v>59.448034762508</v>
      </c>
      <c r="AU27" s="6">
        <v>55.9068043846481</v>
      </c>
      <c r="AV27" s="6">
        <v>0.833904601032657</v>
      </c>
      <c r="AW27" s="6">
        <v>0.281035255714812</v>
      </c>
      <c r="AX27" s="6">
        <v>0.690056253039188</v>
      </c>
      <c r="AY27" s="6">
        <v>63.4540182392811</v>
      </c>
      <c r="AZ27" s="6">
        <v>62.8200661486474</v>
      </c>
      <c r="BA27" s="6">
        <v>64.8166972070632</v>
      </c>
      <c r="BB27" s="6">
        <v>61.46104663602</v>
      </c>
      <c r="BC27" s="6">
        <v>60.074301257481</v>
      </c>
      <c r="BD27" s="6">
        <v>60.7351520341312</v>
      </c>
      <c r="BE27" s="6">
        <v>51.2711492801309</v>
      </c>
      <c r="BF27" s="6">
        <v>5.69377202334476</v>
      </c>
      <c r="BG27" s="6">
        <v>3.29739086545067</v>
      </c>
      <c r="BH27" s="6">
        <v>0.654536455130938</v>
      </c>
      <c r="BI27" s="6">
        <v>0.850164911103036</v>
      </c>
      <c r="BJ27" s="6">
        <v>0.50630580715881</v>
      </c>
      <c r="BK27" s="6">
        <v>52.3116929318188</v>
      </c>
      <c r="BL27" s="6">
        <v>55.83019314803</v>
      </c>
      <c r="BM27" s="6">
        <v>52.2968022610227</v>
      </c>
      <c r="BN27" s="6">
        <v>51.69596402441</v>
      </c>
      <c r="BO27" s="6">
        <v>47.7197312575372</v>
      </c>
      <c r="BP27" s="6">
        <v>50.7594851345942</v>
      </c>
      <c r="BQ27" s="6">
        <v>2.84184640759025</v>
      </c>
      <c r="BR27" s="6">
        <v>2.73227244117817</v>
      </c>
      <c r="BS27" s="6">
        <v>4.6287247629117</v>
      </c>
      <c r="BT27" s="6">
        <v>0.337766285317173</v>
      </c>
      <c r="BU27" s="6">
        <v>1.47253805399527</v>
      </c>
      <c r="BV27" s="6">
        <v>0.153325167004198</v>
      </c>
      <c r="BW27" s="6">
        <v>57.4690733183038</v>
      </c>
      <c r="BX27" s="6">
        <v>62.8040456461778</v>
      </c>
      <c r="BY27" s="6">
        <v>61.2907163568732</v>
      </c>
      <c r="BZ27" s="6">
        <v>62.0148384071459</v>
      </c>
      <c r="CA27" s="6">
        <v>59.6271278801452</v>
      </c>
      <c r="CB27" s="6">
        <v>52.7125686707461</v>
      </c>
      <c r="CC27" s="6">
        <v>0.921755939332286</v>
      </c>
      <c r="CD27" s="6">
        <v>4.80698427425187</v>
      </c>
      <c r="CE27" s="6">
        <v>48.3680422748653</v>
      </c>
      <c r="CF27" s="6">
        <v>0.617029213830563</v>
      </c>
      <c r="CG27" s="6">
        <v>0.0107949174987425</v>
      </c>
      <c r="CH27" s="6">
        <v>0.180785439250258</v>
      </c>
      <c r="CI27" s="6">
        <v>51.035759940483</v>
      </c>
      <c r="CJ27" s="6">
        <v>55.6726816211772</v>
      </c>
      <c r="CK27" s="6">
        <v>49.1595101764432</v>
      </c>
      <c r="CL27" s="6">
        <v>50.6377230079784</v>
      </c>
      <c r="CM27" s="6">
        <v>52.5125673436933</v>
      </c>
      <c r="CN27" s="6">
        <v>35.1808992606395</v>
      </c>
      <c r="CO27" s="6">
        <v>0.787514950348623</v>
      </c>
      <c r="CP27" s="6">
        <v>45.5512806584833</v>
      </c>
      <c r="CQ27" s="6">
        <v>9.10258617422466</v>
      </c>
      <c r="CR27" s="6">
        <v>1.62795992327949</v>
      </c>
      <c r="CS27" s="6">
        <v>1.45276723960382</v>
      </c>
      <c r="CT27" s="6">
        <v>1.50053066398334</v>
      </c>
    </row>
    <row r="28" spans="2:98" ht="15" customHeight="true">
      <c r="B28" s="6">
        <v>78</v>
      </c>
      <c r="C28" s="6">
        <v>52.6124909458682</v>
      </c>
      <c r="D28" s="6">
        <v>48.1524811061279</v>
      </c>
      <c r="E28" s="6">
        <v>58.0462148006548</v>
      </c>
      <c r="F28" s="6">
        <v>54.2845203287146</v>
      </c>
      <c r="G28" s="6">
        <v>54.2884526167005</v>
      </c>
      <c r="H28" s="6">
        <v>60.306889394026</v>
      </c>
      <c r="I28" s="6">
        <v>56.5102163111452</v>
      </c>
      <c r="J28" s="6">
        <v>54.573998337363</v>
      </c>
      <c r="K28" s="6">
        <v>57.704236287239</v>
      </c>
      <c r="L28" s="6">
        <v>1.27798514887229</v>
      </c>
      <c r="M28" s="6">
        <v>0.752907874777293</v>
      </c>
      <c r="N28" s="6">
        <v>0.259791883632772</v>
      </c>
      <c r="O28" s="6">
        <v>48.2892331482269</v>
      </c>
      <c r="P28" s="6">
        <v>55.5659895140233</v>
      </c>
      <c r="Q28" s="6">
        <v>51.1461302265412</v>
      </c>
      <c r="R28" s="6">
        <v>53.0432215152438</v>
      </c>
      <c r="S28" s="6">
        <v>53.4224221270142</v>
      </c>
      <c r="T28" s="6">
        <v>54.9018420395768</v>
      </c>
      <c r="U28" s="6">
        <v>53.3707645336223</v>
      </c>
      <c r="V28" s="6">
        <v>52.0781124762079</v>
      </c>
      <c r="W28" s="6">
        <v>57.422348230196</v>
      </c>
      <c r="X28" s="6">
        <v>0.508933557004013</v>
      </c>
      <c r="Y28" s="6">
        <v>0.858944315161011</v>
      </c>
      <c r="Z28" s="6">
        <v>0.385561123209243</v>
      </c>
      <c r="AA28" s="6">
        <v>57.4863740270221</v>
      </c>
      <c r="AB28" s="6">
        <v>56.2413156121391</v>
      </c>
      <c r="AC28" s="6">
        <v>62.8520826875</v>
      </c>
      <c r="AD28" s="6">
        <v>59.9937866949938</v>
      </c>
      <c r="AE28" s="6">
        <v>63.987817940363</v>
      </c>
      <c r="AF28" s="6">
        <v>61.8975388755093</v>
      </c>
      <c r="AG28" s="6">
        <v>66.0890543865447</v>
      </c>
      <c r="AH28" s="6">
        <v>64.3007453922574</v>
      </c>
      <c r="AI28" s="6">
        <v>58.8329589437211</v>
      </c>
      <c r="AJ28" s="6">
        <v>1.2074522258182</v>
      </c>
      <c r="AK28" s="6">
        <v>0.36217015405083</v>
      </c>
      <c r="AL28" s="6">
        <v>0.601148352628456</v>
      </c>
      <c r="AM28" s="6">
        <v>48.7355392690205</v>
      </c>
      <c r="AN28" s="6">
        <v>53.6833032236025</v>
      </c>
      <c r="AO28" s="6">
        <v>53.7323288296258</v>
      </c>
      <c r="AP28" s="6">
        <v>59.300558488972</v>
      </c>
      <c r="AQ28" s="6">
        <v>57.4371400164892</v>
      </c>
      <c r="AR28" s="6">
        <v>53.7727562095861</v>
      </c>
      <c r="AS28" s="6">
        <v>59.9719031253967</v>
      </c>
      <c r="AT28" s="6">
        <v>60.2135852192097</v>
      </c>
      <c r="AU28" s="6">
        <v>56.6701033289961</v>
      </c>
      <c r="AV28" s="6">
        <v>1.15084557564086</v>
      </c>
      <c r="AW28" s="6">
        <v>-0.142504190070952</v>
      </c>
      <c r="AX28" s="6">
        <v>1.06940844832479</v>
      </c>
      <c r="AY28" s="6">
        <v>63.6691429011664</v>
      </c>
      <c r="AZ28" s="6">
        <v>63.268229674367</v>
      </c>
      <c r="BA28" s="6">
        <v>65.0394566721258</v>
      </c>
      <c r="BB28" s="6">
        <v>61.6044646283499</v>
      </c>
      <c r="BC28" s="6">
        <v>59.3661559196706</v>
      </c>
      <c r="BD28" s="6">
        <v>60.1472303842535</v>
      </c>
      <c r="BE28" s="6">
        <v>35.3184889802949</v>
      </c>
      <c r="BF28" s="6">
        <v>5.49059934375464</v>
      </c>
      <c r="BG28" s="6">
        <v>3.71683729071884</v>
      </c>
      <c r="BH28" s="6">
        <v>1.38293541378494</v>
      </c>
      <c r="BI28" s="6">
        <v>1.36809712107635</v>
      </c>
      <c r="BJ28" s="6">
        <v>1.18898906964483</v>
      </c>
      <c r="BK28" s="6">
        <v>53.4783220154772</v>
      </c>
      <c r="BL28" s="6">
        <v>56.100194048205</v>
      </c>
      <c r="BM28" s="6">
        <v>52.0562234586216</v>
      </c>
      <c r="BN28" s="6">
        <v>52.7357739574759</v>
      </c>
      <c r="BO28" s="6">
        <v>49.2887451823545</v>
      </c>
      <c r="BP28" s="6">
        <v>51.8862992322666</v>
      </c>
      <c r="BQ28" s="6">
        <v>3.7626896659026</v>
      </c>
      <c r="BR28" s="6">
        <v>2.44731844994976</v>
      </c>
      <c r="BS28" s="6">
        <v>4.31495433799029</v>
      </c>
      <c r="BT28" s="6">
        <v>0.461041387977218</v>
      </c>
      <c r="BU28" s="6">
        <v>1.02693424848161</v>
      </c>
      <c r="BV28" s="6">
        <v>0.771377714191829</v>
      </c>
      <c r="BW28" s="6">
        <v>58.3656903920619</v>
      </c>
      <c r="BX28" s="6">
        <v>63.1717096624176</v>
      </c>
      <c r="BY28" s="6">
        <v>61.6412352968305</v>
      </c>
      <c r="BZ28" s="6">
        <v>62.0940227043718</v>
      </c>
      <c r="CA28" s="6">
        <v>58.8944323306998</v>
      </c>
      <c r="CB28" s="6">
        <v>53.6910404855063</v>
      </c>
      <c r="CC28" s="6">
        <v>1.02364465871898</v>
      </c>
      <c r="CD28" s="6">
        <v>4.19770999335208</v>
      </c>
      <c r="CE28" s="6">
        <v>35.6170722526745</v>
      </c>
      <c r="CF28" s="6">
        <v>0.81153456428558</v>
      </c>
      <c r="CG28" s="6">
        <v>0.255661814708787</v>
      </c>
      <c r="CH28" s="6">
        <v>-0.0471077117618393</v>
      </c>
      <c r="CI28" s="6">
        <v>51.9609317758959</v>
      </c>
      <c r="CJ28" s="6">
        <v>56.0111069812862</v>
      </c>
      <c r="CK28" s="6">
        <v>50.0548328623158</v>
      </c>
      <c r="CL28" s="6">
        <v>51.4659228268373</v>
      </c>
      <c r="CM28" s="6">
        <v>51.9762584238302</v>
      </c>
      <c r="CN28" s="6">
        <v>35.2127742751887</v>
      </c>
      <c r="CO28" s="6">
        <v>1.53284124465881</v>
      </c>
      <c r="CP28" s="6">
        <v>32.1817935233213</v>
      </c>
      <c r="CQ28" s="6">
        <v>8.71871967277014</v>
      </c>
      <c r="CR28" s="6">
        <v>1.39328823209564</v>
      </c>
      <c r="CS28" s="6">
        <v>1.24855268864246</v>
      </c>
      <c r="CT28" s="6">
        <v>1.42467195149328</v>
      </c>
    </row>
    <row r="29" spans="2:98" ht="15" customHeight="true">
      <c r="B29" s="6">
        <v>78.5</v>
      </c>
      <c r="C29" s="6">
        <v>54.5150527037633</v>
      </c>
      <c r="D29" s="6">
        <v>49.5509197716715</v>
      </c>
      <c r="E29" s="6">
        <v>58.9241376801987</v>
      </c>
      <c r="F29" s="6">
        <v>55.538626382595</v>
      </c>
      <c r="G29" s="6">
        <v>55.9655079500652</v>
      </c>
      <c r="H29" s="6">
        <v>61.1009385434616</v>
      </c>
      <c r="I29" s="6">
        <v>57.4522708684771</v>
      </c>
      <c r="J29" s="6">
        <v>56.6688815655641</v>
      </c>
      <c r="K29" s="6">
        <v>58.3032115313185</v>
      </c>
      <c r="L29" s="6">
        <v>1.91566188242069</v>
      </c>
      <c r="M29" s="6">
        <v>1.4509062448787</v>
      </c>
      <c r="N29" s="6">
        <v>0.786550977261356</v>
      </c>
      <c r="O29" s="6">
        <v>48.5738857484242</v>
      </c>
      <c r="P29" s="6">
        <v>56.5756427276184</v>
      </c>
      <c r="Q29" s="6">
        <v>52.8194493963948</v>
      </c>
      <c r="R29" s="6">
        <v>54.2874273877242</v>
      </c>
      <c r="S29" s="6">
        <v>54.5588620607705</v>
      </c>
      <c r="T29" s="6">
        <v>55.4671883240578</v>
      </c>
      <c r="U29" s="6">
        <v>54.4663127364001</v>
      </c>
      <c r="V29" s="6">
        <v>53.0862570386089</v>
      </c>
      <c r="W29" s="6">
        <v>58.2170895752868</v>
      </c>
      <c r="X29" s="6">
        <v>0.988890556795752</v>
      </c>
      <c r="Y29" s="6">
        <v>1.00784290353556</v>
      </c>
      <c r="Z29" s="6">
        <v>0.430346401222948</v>
      </c>
      <c r="AA29" s="6">
        <v>58.1055744752728</v>
      </c>
      <c r="AB29" s="6">
        <v>58.3422074657257</v>
      </c>
      <c r="AC29" s="6">
        <v>64.4539154820196</v>
      </c>
      <c r="AD29" s="6">
        <v>61.5937021239636</v>
      </c>
      <c r="AE29" s="6">
        <v>65.2114160244249</v>
      </c>
      <c r="AF29" s="6">
        <v>63.1448516527681</v>
      </c>
      <c r="AG29" s="6">
        <v>67.0138644303476</v>
      </c>
      <c r="AH29" s="6">
        <v>66.0464260665868</v>
      </c>
      <c r="AI29" s="6">
        <v>60.4207395652535</v>
      </c>
      <c r="AJ29" s="6">
        <v>0.764478664298281</v>
      </c>
      <c r="AK29" s="6">
        <v>0.656023399974231</v>
      </c>
      <c r="AL29" s="6">
        <v>1.1329345968262</v>
      </c>
      <c r="AM29" s="6">
        <v>49.9856144404097</v>
      </c>
      <c r="AN29" s="6">
        <v>56.0839004198382</v>
      </c>
      <c r="AO29" s="6">
        <v>55.5467638221132</v>
      </c>
      <c r="AP29" s="6">
        <v>59.5352323864909</v>
      </c>
      <c r="AQ29" s="6">
        <v>58.2967952090503</v>
      </c>
      <c r="AR29" s="6">
        <v>55.2098839603742</v>
      </c>
      <c r="AS29" s="6">
        <v>60.1108239345015</v>
      </c>
      <c r="AT29" s="6">
        <v>61.5620945620288</v>
      </c>
      <c r="AU29" s="6">
        <v>57.8852369031388</v>
      </c>
      <c r="AV29" s="6">
        <v>1.11439633423407</v>
      </c>
      <c r="AW29" s="6">
        <v>0.161137403705197</v>
      </c>
      <c r="AX29" s="6">
        <v>1.47036851103996</v>
      </c>
      <c r="AY29" s="6">
        <v>64.8163023445422</v>
      </c>
      <c r="AZ29" s="6">
        <v>64.1597967780144</v>
      </c>
      <c r="BA29" s="6">
        <v>66.010487170174</v>
      </c>
      <c r="BB29" s="6">
        <v>63.2209204896746</v>
      </c>
      <c r="BC29" s="6">
        <v>59.7101327908399</v>
      </c>
      <c r="BD29" s="6">
        <v>59.7996420050964</v>
      </c>
      <c r="BE29" s="6">
        <v>21.5627751675982</v>
      </c>
      <c r="BF29" s="6">
        <v>5.65561901155632</v>
      </c>
      <c r="BG29" s="6">
        <v>3.5967954879373</v>
      </c>
      <c r="BH29" s="6">
        <v>1.60686645297159</v>
      </c>
      <c r="BI29" s="6">
        <v>1.58355754617747</v>
      </c>
      <c r="BJ29" s="6">
        <v>1.44151409797894</v>
      </c>
      <c r="BK29" s="6">
        <v>55.0896834270814</v>
      </c>
      <c r="BL29" s="6">
        <v>56.9640719077468</v>
      </c>
      <c r="BM29" s="6">
        <v>52.3044618756755</v>
      </c>
      <c r="BN29" s="6">
        <v>53.9780705888932</v>
      </c>
      <c r="BO29" s="6">
        <v>51.1681494777333</v>
      </c>
      <c r="BP29" s="6">
        <v>52.8314363980772</v>
      </c>
      <c r="BQ29" s="6">
        <v>4.11541658848944</v>
      </c>
      <c r="BR29" s="6">
        <v>2.72389578461184</v>
      </c>
      <c r="BS29" s="6">
        <v>3.85888200364508</v>
      </c>
      <c r="BT29" s="6">
        <v>0.395523078685414</v>
      </c>
      <c r="BU29" s="6">
        <v>0.869830100770173</v>
      </c>
      <c r="BV29" s="6">
        <v>1.44327248856069</v>
      </c>
      <c r="BW29" s="6">
        <v>59.8503275191098</v>
      </c>
      <c r="BX29" s="6">
        <v>63.6219966953696</v>
      </c>
      <c r="BY29" s="6">
        <v>62.6684950613963</v>
      </c>
      <c r="BZ29" s="6">
        <v>62.6069347110793</v>
      </c>
      <c r="CA29" s="6">
        <v>59.5800553958999</v>
      </c>
      <c r="CB29" s="6">
        <v>54.7237472606389</v>
      </c>
      <c r="CC29" s="6">
        <v>1.56536158460108</v>
      </c>
      <c r="CD29" s="6">
        <v>4.34205483262195</v>
      </c>
      <c r="CE29" s="6">
        <v>23.3063655400186</v>
      </c>
      <c r="CF29" s="6">
        <v>1.27188891794157</v>
      </c>
      <c r="CG29" s="6">
        <v>0.84015123538677</v>
      </c>
      <c r="CH29" s="6">
        <v>0.372779199881279</v>
      </c>
      <c r="CI29" s="6">
        <v>52.8786654866489</v>
      </c>
      <c r="CJ29" s="6">
        <v>56.0986123569971</v>
      </c>
      <c r="CK29" s="6">
        <v>50.6897011934844</v>
      </c>
      <c r="CL29" s="6">
        <v>52.9008357385833</v>
      </c>
      <c r="CM29" s="6">
        <v>52.5620368937238</v>
      </c>
      <c r="CN29" s="6">
        <v>35.9950170980555</v>
      </c>
      <c r="CO29" s="6">
        <v>2.15970917873528</v>
      </c>
      <c r="CP29" s="6">
        <v>20.2515661976276</v>
      </c>
      <c r="CQ29" s="6">
        <v>8.66862047441725</v>
      </c>
      <c r="CR29" s="6">
        <v>1.22592494450703</v>
      </c>
      <c r="CS29" s="6">
        <v>1.3523764493824</v>
      </c>
      <c r="CT29" s="6">
        <v>0.985923765753455</v>
      </c>
    </row>
    <row r="30" spans="2:98" ht="15" customHeight="true">
      <c r="B30" s="6">
        <v>79</v>
      </c>
      <c r="C30" s="6">
        <v>56.0995484461519</v>
      </c>
      <c r="D30" s="6">
        <v>50.9660600635839</v>
      </c>
      <c r="E30" s="6">
        <v>61.1599089781988</v>
      </c>
      <c r="F30" s="6">
        <v>56.7445115086579</v>
      </c>
      <c r="G30" s="6">
        <v>58.4691524510671</v>
      </c>
      <c r="H30" s="6">
        <v>62.3128936723282</v>
      </c>
      <c r="I30" s="6">
        <v>59.1965459358808</v>
      </c>
      <c r="J30" s="6">
        <v>59.3864424559337</v>
      </c>
      <c r="K30" s="6">
        <v>60.0870793023603</v>
      </c>
      <c r="L30" s="6">
        <v>2.05295308808081</v>
      </c>
      <c r="M30" s="6">
        <v>1.55878987944357</v>
      </c>
      <c r="N30" s="6">
        <v>1.21546672464939</v>
      </c>
      <c r="O30" s="6">
        <v>49.6425404321536</v>
      </c>
      <c r="P30" s="6">
        <v>57.8841470173667</v>
      </c>
      <c r="Q30" s="6">
        <v>55.5461827683084</v>
      </c>
      <c r="R30" s="6">
        <v>56.5340005018306</v>
      </c>
      <c r="S30" s="6">
        <v>56.7344500583064</v>
      </c>
      <c r="T30" s="6">
        <v>57.0376090290256</v>
      </c>
      <c r="U30" s="6">
        <v>57.0419114539432</v>
      </c>
      <c r="V30" s="6">
        <v>55.5078816562468</v>
      </c>
      <c r="W30" s="6">
        <v>59.6065381951072</v>
      </c>
      <c r="X30" s="6">
        <v>1.00065970612417</v>
      </c>
      <c r="Y30" s="6">
        <v>0.512943490642158</v>
      </c>
      <c r="Z30" s="6">
        <v>0.245326062845038</v>
      </c>
      <c r="AA30" s="6">
        <v>59.0090596968652</v>
      </c>
      <c r="AB30" s="6">
        <v>60.7497000114358</v>
      </c>
      <c r="AC30" s="6">
        <v>67.2391571908462</v>
      </c>
      <c r="AD30" s="6">
        <v>64.288451269472</v>
      </c>
      <c r="AE30" s="6">
        <v>67.672172501886</v>
      </c>
      <c r="AF30" s="6">
        <v>64.8467727796631</v>
      </c>
      <c r="AG30" s="6">
        <v>69.5792818386302</v>
      </c>
      <c r="AH30" s="6">
        <v>69.0385706829206</v>
      </c>
      <c r="AI30" s="6">
        <v>63.0235180760008</v>
      </c>
      <c r="AJ30" s="6">
        <v>0.300029239412311</v>
      </c>
      <c r="AK30" s="6">
        <v>0.846129441475512</v>
      </c>
      <c r="AL30" s="6">
        <v>1.59736805238464</v>
      </c>
      <c r="AM30" s="6">
        <v>50.9869701354977</v>
      </c>
      <c r="AN30" s="6">
        <v>58.0090256373716</v>
      </c>
      <c r="AO30" s="6">
        <v>57.7441433081079</v>
      </c>
      <c r="AP30" s="6">
        <v>61.4278691301897</v>
      </c>
      <c r="AQ30" s="6">
        <v>60.6370351370498</v>
      </c>
      <c r="AR30" s="6">
        <v>58.0799038666754</v>
      </c>
      <c r="AS30" s="6">
        <v>62.0910226999459</v>
      </c>
      <c r="AT30" s="6">
        <v>64.1470768655736</v>
      </c>
      <c r="AU30" s="6">
        <v>59.5761659687512</v>
      </c>
      <c r="AV30" s="6">
        <v>1.6202931085765</v>
      </c>
      <c r="AW30" s="6">
        <v>0.611531421466907</v>
      </c>
      <c r="AX30" s="6">
        <v>1.97159651385073</v>
      </c>
      <c r="AY30" s="6">
        <v>66.5002995777624</v>
      </c>
      <c r="AZ30" s="6">
        <v>65.5340231992552</v>
      </c>
      <c r="BA30" s="6">
        <v>66.9266628539967</v>
      </c>
      <c r="BB30" s="6">
        <v>65.706636694305</v>
      </c>
      <c r="BC30" s="6">
        <v>61.1917228856109</v>
      </c>
      <c r="BD30" s="6">
        <v>60.4242216602754</v>
      </c>
      <c r="BE30" s="6">
        <v>11.5837528497535</v>
      </c>
      <c r="BF30" s="6">
        <v>5.604176735713</v>
      </c>
      <c r="BG30" s="6">
        <v>3.74218514304818</v>
      </c>
      <c r="BH30" s="6">
        <v>1.54352400631728</v>
      </c>
      <c r="BI30" s="6">
        <v>0.780217410666751</v>
      </c>
      <c r="BJ30" s="6">
        <v>1.25349765254089</v>
      </c>
      <c r="BK30" s="6">
        <v>57.290743172974</v>
      </c>
      <c r="BL30" s="6">
        <v>58.3218573016826</v>
      </c>
      <c r="BM30" s="6">
        <v>53.7781793356344</v>
      </c>
      <c r="BN30" s="6">
        <v>55.8031129915352</v>
      </c>
      <c r="BO30" s="6">
        <v>52.8085163608766</v>
      </c>
      <c r="BP30" s="6">
        <v>53.9733750503175</v>
      </c>
      <c r="BQ30" s="6">
        <v>3.94178030818784</v>
      </c>
      <c r="BR30" s="6">
        <v>3.0586165839062</v>
      </c>
      <c r="BS30" s="6">
        <v>4.04025315748845</v>
      </c>
      <c r="BT30" s="6">
        <v>0.243427216475197</v>
      </c>
      <c r="BU30" s="6">
        <v>0.818980874071087</v>
      </c>
      <c r="BV30" s="6">
        <v>1.8878923684311</v>
      </c>
      <c r="BW30" s="6">
        <v>61.5629388071665</v>
      </c>
      <c r="BX30" s="6">
        <v>65.1824828922036</v>
      </c>
      <c r="BY30" s="6">
        <v>63.8500635496352</v>
      </c>
      <c r="BZ30" s="6">
        <v>63.5293841140605</v>
      </c>
      <c r="CA30" s="6">
        <v>61.1104427877063</v>
      </c>
      <c r="CB30" s="6">
        <v>56.4353957824742</v>
      </c>
      <c r="CC30" s="6">
        <v>2.20968865447509</v>
      </c>
      <c r="CD30" s="6">
        <v>4.01575791188168</v>
      </c>
      <c r="CE30" s="6">
        <v>13.2552057355283</v>
      </c>
      <c r="CF30" s="6">
        <v>1.42133693289446</v>
      </c>
      <c r="CG30" s="6">
        <v>1.47967833825527</v>
      </c>
      <c r="CH30" s="6">
        <v>1.08348602197833</v>
      </c>
      <c r="CI30" s="6">
        <v>54.4481914843692</v>
      </c>
      <c r="CJ30" s="6">
        <v>56.8804582636917</v>
      </c>
      <c r="CK30" s="6">
        <v>52.7623561623598</v>
      </c>
      <c r="CL30" s="6">
        <v>54.7983603007887</v>
      </c>
      <c r="CM30" s="6">
        <v>54.5832781526288</v>
      </c>
      <c r="CN30" s="6">
        <v>37.6426994138178</v>
      </c>
      <c r="CO30" s="6">
        <v>2.27486530838473</v>
      </c>
      <c r="CP30" s="6">
        <v>11.1837556508059</v>
      </c>
      <c r="CQ30" s="6">
        <v>9.02147165166679</v>
      </c>
      <c r="CR30" s="6">
        <v>1.2147688566555</v>
      </c>
      <c r="CS30" s="6">
        <v>0.926361345517534</v>
      </c>
      <c r="CT30" s="6">
        <v>0.803950361981322</v>
      </c>
    </row>
    <row r="31" spans="2:98" ht="15" customHeight="true">
      <c r="B31" s="6">
        <v>79.5</v>
      </c>
      <c r="C31" s="6">
        <v>58.9319832444954</v>
      </c>
      <c r="D31" s="6">
        <v>54.4913178789871</v>
      </c>
      <c r="E31" s="6">
        <v>66.1450036185982</v>
      </c>
      <c r="F31" s="6">
        <v>61.3423550855878</v>
      </c>
      <c r="G31" s="6">
        <v>62.9778971294707</v>
      </c>
      <c r="H31" s="6">
        <v>66.0256327629613</v>
      </c>
      <c r="I31" s="6">
        <v>62.6147376457406</v>
      </c>
      <c r="J31" s="6">
        <v>64.4858984017092</v>
      </c>
      <c r="K31" s="6">
        <v>65.3956087955316</v>
      </c>
      <c r="L31" s="6">
        <v>1.8160536670685</v>
      </c>
      <c r="M31" s="6">
        <v>1.87945308215524</v>
      </c>
      <c r="N31" s="6">
        <v>0.445355753162687</v>
      </c>
      <c r="O31" s="6">
        <v>52.9254450640829</v>
      </c>
      <c r="P31" s="6">
        <v>61.4053201694587</v>
      </c>
      <c r="Q31" s="6">
        <v>60.6040315728766</v>
      </c>
      <c r="R31" s="6">
        <v>61.4161843271637</v>
      </c>
      <c r="S31" s="6">
        <v>61.3688634753988</v>
      </c>
      <c r="T31" s="6">
        <v>60.0263799918445</v>
      </c>
      <c r="U31" s="6">
        <v>62.1118189368585</v>
      </c>
      <c r="V31" s="6">
        <v>61.3926208957517</v>
      </c>
      <c r="W31" s="6">
        <v>65.5832658905174</v>
      </c>
      <c r="X31" s="6">
        <v>0.593711719076794</v>
      </c>
      <c r="Y31" s="6">
        <v>0.355568849232782</v>
      </c>
      <c r="Z31" s="6">
        <v>0.219555614237265</v>
      </c>
      <c r="AA31" s="6">
        <v>61.763051112417</v>
      </c>
      <c r="AB31" s="6">
        <v>64.894637946625</v>
      </c>
      <c r="AC31" s="6">
        <v>73.5138961421588</v>
      </c>
      <c r="AD31" s="6">
        <v>70.5541324343889</v>
      </c>
      <c r="AE31" s="6">
        <v>73.5760106895092</v>
      </c>
      <c r="AF31" s="6">
        <v>68.735762220292</v>
      </c>
      <c r="AG31" s="6">
        <v>75.308846919921</v>
      </c>
      <c r="AH31" s="6">
        <v>74.8141306972245</v>
      </c>
      <c r="AI31" s="6">
        <v>68.8430171396578</v>
      </c>
      <c r="AJ31" s="6">
        <v>0.330802491899192</v>
      </c>
      <c r="AK31" s="6">
        <v>0.748801941611987</v>
      </c>
      <c r="AL31" s="6">
        <v>1.08666643322761</v>
      </c>
      <c r="AM31" s="6">
        <v>53.3978451029704</v>
      </c>
      <c r="AN31" s="6">
        <v>62.0603462610351</v>
      </c>
      <c r="AO31" s="6">
        <v>62.5398637068574</v>
      </c>
      <c r="AP31" s="6">
        <v>67.153415193788</v>
      </c>
      <c r="AQ31" s="6">
        <v>65.9998152313265</v>
      </c>
      <c r="AR31" s="6">
        <v>63.4950657871998</v>
      </c>
      <c r="AS31" s="6">
        <v>67.2261250817994</v>
      </c>
      <c r="AT31" s="6">
        <v>68.2112476565136</v>
      </c>
      <c r="AU31" s="6">
        <v>65.6358217583911</v>
      </c>
      <c r="AV31" s="6">
        <v>1.53264954336072</v>
      </c>
      <c r="AW31" s="6">
        <v>0.297583023813104</v>
      </c>
      <c r="AX31" s="6">
        <v>2.01232747370665</v>
      </c>
      <c r="AY31" s="6">
        <v>68.5782154892712</v>
      </c>
      <c r="AZ31" s="6">
        <v>67.8411459046026</v>
      </c>
      <c r="BA31" s="6">
        <v>67.8256550065404</v>
      </c>
      <c r="BB31" s="6">
        <v>67.6238991139548</v>
      </c>
      <c r="BC31" s="6">
        <v>63.3955028579108</v>
      </c>
      <c r="BD31" s="6">
        <v>62.6053030409978</v>
      </c>
      <c r="BE31" s="6">
        <v>5.84783611906153</v>
      </c>
      <c r="BF31" s="6">
        <v>5.24341408944747</v>
      </c>
      <c r="BG31" s="6">
        <v>3.78912186043101</v>
      </c>
      <c r="BH31" s="6">
        <v>1.24276017587806</v>
      </c>
      <c r="BI31" s="6">
        <v>0.284058944416472</v>
      </c>
      <c r="BJ31" s="6">
        <v>1.10614216263224</v>
      </c>
      <c r="BK31" s="6">
        <v>59.8826280079714</v>
      </c>
      <c r="BL31" s="6">
        <v>59.447880148105</v>
      </c>
      <c r="BM31" s="6">
        <v>55.8335155091128</v>
      </c>
      <c r="BN31" s="6">
        <v>58.1834987096724</v>
      </c>
      <c r="BO31" s="6">
        <v>54.536501909471</v>
      </c>
      <c r="BP31" s="6">
        <v>55.6906427090021</v>
      </c>
      <c r="BQ31" s="6">
        <v>3.27039737632617</v>
      </c>
      <c r="BR31" s="6">
        <v>2.5757803401043</v>
      </c>
      <c r="BS31" s="6">
        <v>4.29014204396799</v>
      </c>
      <c r="BT31" s="6">
        <v>0.342550001637846</v>
      </c>
      <c r="BU31" s="6">
        <v>0.539357315387917</v>
      </c>
      <c r="BV31" s="6">
        <v>2.04149482082875</v>
      </c>
      <c r="BW31" s="6">
        <v>64.0779050861376</v>
      </c>
      <c r="BX31" s="6">
        <v>66.6551607728713</v>
      </c>
      <c r="BY31" s="6">
        <v>65.5759571335071</v>
      </c>
      <c r="BZ31" s="6">
        <v>65.0300699586256</v>
      </c>
      <c r="CA31" s="6">
        <v>63.0373242936642</v>
      </c>
      <c r="CB31" s="6">
        <v>58.2219729947874</v>
      </c>
      <c r="CC31" s="6">
        <v>2.29930516276949</v>
      </c>
      <c r="CD31" s="6">
        <v>3.13119722917344</v>
      </c>
      <c r="CE31" s="6">
        <v>6.38593699586664</v>
      </c>
      <c r="CF31" s="6">
        <v>1.09164815734442</v>
      </c>
      <c r="CG31" s="6">
        <v>1.45486141311278</v>
      </c>
      <c r="CH31" s="6">
        <v>1.22137118549125</v>
      </c>
      <c r="CI31" s="6">
        <v>56.4114075967496</v>
      </c>
      <c r="CJ31" s="6">
        <v>58.7809300156233</v>
      </c>
      <c r="CK31" s="6">
        <v>55.7630116848652</v>
      </c>
      <c r="CL31" s="6">
        <v>57.5817701754897</v>
      </c>
      <c r="CM31" s="6">
        <v>56.9186046607596</v>
      </c>
      <c r="CN31" s="6">
        <v>40.0877889151293</v>
      </c>
      <c r="CO31" s="6">
        <v>2.71829893645383</v>
      </c>
      <c r="CP31" s="6">
        <v>5.33764523358997</v>
      </c>
      <c r="CQ31" s="6">
        <v>8.59771712300443</v>
      </c>
      <c r="CR31" s="6">
        <v>0.67657284359791</v>
      </c>
      <c r="CS31" s="6">
        <v>0.14026111180101</v>
      </c>
      <c r="CT31" s="6">
        <v>0.506607165004596</v>
      </c>
    </row>
    <row r="32" spans="2:98" ht="15" customHeight="true">
      <c r="B32" s="6">
        <v>80</v>
      </c>
      <c r="C32" s="6">
        <v>66.7798626687621</v>
      </c>
      <c r="D32" s="6">
        <v>62.2533623392855</v>
      </c>
      <c r="E32" s="6">
        <v>78.87452777993</v>
      </c>
      <c r="F32" s="6">
        <v>73.7652649420936</v>
      </c>
      <c r="G32" s="6">
        <v>73.1094755805888</v>
      </c>
      <c r="H32" s="6">
        <v>75.7934087441538</v>
      </c>
      <c r="I32" s="6">
        <v>71.9529177535483</v>
      </c>
      <c r="J32" s="6">
        <v>77.6038370245129</v>
      </c>
      <c r="K32" s="6">
        <v>78.0342803624293</v>
      </c>
      <c r="L32" s="6">
        <v>1.24534804426867</v>
      </c>
      <c r="M32" s="6">
        <v>1.69722944905186</v>
      </c>
      <c r="N32" s="6">
        <v>0.282088680804406</v>
      </c>
      <c r="O32" s="6">
        <v>59.4632483335195</v>
      </c>
      <c r="P32" s="6">
        <v>69.5646682217501</v>
      </c>
      <c r="Q32" s="6">
        <v>72.5601287387422</v>
      </c>
      <c r="R32" s="6">
        <v>72.7929837373041</v>
      </c>
      <c r="S32" s="6">
        <v>74.4443666107904</v>
      </c>
      <c r="T32" s="6">
        <v>69.0450278188043</v>
      </c>
      <c r="U32" s="6">
        <v>73.9706506158586</v>
      </c>
      <c r="V32" s="6">
        <v>74.8112062064205</v>
      </c>
      <c r="W32" s="6">
        <v>81.8840580382695</v>
      </c>
      <c r="X32" s="6">
        <v>0.812148783501186</v>
      </c>
      <c r="Y32" s="6">
        <v>0.742943045751474</v>
      </c>
      <c r="Z32" s="6">
        <v>0.465861196762603</v>
      </c>
      <c r="AA32" s="6">
        <v>68.6343993243268</v>
      </c>
      <c r="AB32" s="6">
        <v>74.1461765070395</v>
      </c>
      <c r="AC32" s="6">
        <v>87.0048040926989</v>
      </c>
      <c r="AD32" s="6">
        <v>84.6553814845273</v>
      </c>
      <c r="AE32" s="6">
        <v>87.9680057481253</v>
      </c>
      <c r="AF32" s="6">
        <v>80.2772804182456</v>
      </c>
      <c r="AG32" s="6">
        <v>89.6099612973907</v>
      </c>
      <c r="AH32" s="6">
        <v>89.0910245779099</v>
      </c>
      <c r="AI32" s="6">
        <v>83.7502630368658</v>
      </c>
      <c r="AJ32" s="6">
        <v>0.47039232734403</v>
      </c>
      <c r="AK32" s="6">
        <v>0.915504275568196</v>
      </c>
      <c r="AL32" s="6">
        <v>0.55912226404223</v>
      </c>
      <c r="AM32" s="6">
        <v>59.3340946647122</v>
      </c>
      <c r="AN32" s="6">
        <v>71.1213339341004</v>
      </c>
      <c r="AO32" s="6">
        <v>74.5947798750473</v>
      </c>
      <c r="AP32" s="6">
        <v>81.0029861107218</v>
      </c>
      <c r="AQ32" s="6">
        <v>79.121986965998</v>
      </c>
      <c r="AR32" s="6">
        <v>75.7715969402249</v>
      </c>
      <c r="AS32" s="6">
        <v>79.8066155742342</v>
      </c>
      <c r="AT32" s="6">
        <v>78.9160507167235</v>
      </c>
      <c r="AU32" s="6">
        <v>81.5550260654394</v>
      </c>
      <c r="AV32" s="6">
        <v>0.754856876424299</v>
      </c>
      <c r="AW32" s="6">
        <v>0.326927942161717</v>
      </c>
      <c r="AX32" s="6">
        <v>1.43029895410325</v>
      </c>
      <c r="AY32" s="6">
        <v>71.5474694341522</v>
      </c>
      <c r="AZ32" s="6">
        <v>70.8915902693855</v>
      </c>
      <c r="BA32" s="6">
        <v>70.5608591301592</v>
      </c>
      <c r="BB32" s="6">
        <v>70.4383414986999</v>
      </c>
      <c r="BC32" s="6">
        <v>66.7300547044549</v>
      </c>
      <c r="BD32" s="6">
        <v>66.2842622695278</v>
      </c>
      <c r="BE32" s="6">
        <v>3.56544569744312</v>
      </c>
      <c r="BF32" s="6">
        <v>5.29363727525333</v>
      </c>
      <c r="BG32" s="6">
        <v>3.35067391299287</v>
      </c>
      <c r="BH32" s="6">
        <v>0.783413510579749</v>
      </c>
      <c r="BI32" s="6">
        <v>0.433949269661014</v>
      </c>
      <c r="BJ32" s="6">
        <v>1.09419282368736</v>
      </c>
      <c r="BK32" s="6">
        <v>63.349489493172</v>
      </c>
      <c r="BL32" s="6">
        <v>61.832586126056</v>
      </c>
      <c r="BM32" s="6">
        <v>58.9525374374335</v>
      </c>
      <c r="BN32" s="6">
        <v>60.7405287768054</v>
      </c>
      <c r="BO32" s="6">
        <v>56.6395383037358</v>
      </c>
      <c r="BP32" s="6">
        <v>57.7971823877127</v>
      </c>
      <c r="BQ32" s="6">
        <v>2.5735111966128</v>
      </c>
      <c r="BR32" s="6">
        <v>2.26787391799007</v>
      </c>
      <c r="BS32" s="6">
        <v>3.82470994974375</v>
      </c>
      <c r="BT32" s="6">
        <v>0.0942739679921942</v>
      </c>
      <c r="BU32" s="6">
        <v>0.660747087938319</v>
      </c>
      <c r="BV32" s="6">
        <v>1.77453774973247</v>
      </c>
      <c r="BW32" s="6">
        <v>67.5738219869507</v>
      </c>
      <c r="BX32" s="6">
        <v>68.8890011821558</v>
      </c>
      <c r="BY32" s="6">
        <v>68.7849145194682</v>
      </c>
      <c r="BZ32" s="6">
        <v>67.7955053660836</v>
      </c>
      <c r="CA32" s="6">
        <v>66.3659637562975</v>
      </c>
      <c r="CB32" s="6">
        <v>60.562001848767</v>
      </c>
      <c r="CC32" s="6">
        <v>2.12470225553545</v>
      </c>
      <c r="CD32" s="6">
        <v>3.20913337901345</v>
      </c>
      <c r="CE32" s="6">
        <v>3.3167923899727</v>
      </c>
      <c r="CF32" s="6">
        <v>0.585197095678723</v>
      </c>
      <c r="CG32" s="6">
        <v>1.50542636735298</v>
      </c>
      <c r="CH32" s="6">
        <v>1.45436259475434</v>
      </c>
      <c r="CI32" s="6">
        <v>58.8814522872076</v>
      </c>
      <c r="CJ32" s="6">
        <v>61.7504353253993</v>
      </c>
      <c r="CK32" s="6">
        <v>58.394955548892</v>
      </c>
      <c r="CL32" s="6">
        <v>60.2329102224786</v>
      </c>
      <c r="CM32" s="6">
        <v>59.8902426576659</v>
      </c>
      <c r="CN32" s="6">
        <v>43.2728829127118</v>
      </c>
      <c r="CO32" s="6">
        <v>2.98791032985036</v>
      </c>
      <c r="CP32" s="6">
        <v>3.00333944508321</v>
      </c>
      <c r="CQ32" s="6">
        <v>8.09562514411999</v>
      </c>
      <c r="CR32" s="6">
        <v>0.133594554221872</v>
      </c>
      <c r="CS32" s="6">
        <v>0.139194066869948</v>
      </c>
      <c r="CT32" s="6">
        <v>0.608541114226796</v>
      </c>
    </row>
    <row r="33" spans="2:98" ht="15" customHeight="true">
      <c r="B33" s="6">
        <v>80.5</v>
      </c>
      <c r="C33" s="6">
        <v>78.5127552358042</v>
      </c>
      <c r="D33" s="6">
        <v>74.1895560481686</v>
      </c>
      <c r="E33" s="6">
        <v>102.232819636007</v>
      </c>
      <c r="F33" s="6">
        <v>97.1259201275051</v>
      </c>
      <c r="G33" s="6">
        <v>94.0401643719462</v>
      </c>
      <c r="H33" s="6">
        <v>96.5384363899874</v>
      </c>
      <c r="I33" s="6">
        <v>92.1543116038645</v>
      </c>
      <c r="J33" s="6">
        <v>104.823485448473</v>
      </c>
      <c r="K33" s="6">
        <v>104.20180619588</v>
      </c>
      <c r="L33" s="6">
        <v>0.714964525887922</v>
      </c>
      <c r="M33" s="6">
        <v>0.994489813446307</v>
      </c>
      <c r="N33" s="6">
        <v>0.923124647598172</v>
      </c>
      <c r="O33" s="6">
        <v>69.6930028804305</v>
      </c>
      <c r="P33" s="6">
        <v>82.0718186222642</v>
      </c>
      <c r="Q33" s="6">
        <v>94.4762423417165</v>
      </c>
      <c r="R33" s="6">
        <v>94.7530010009632</v>
      </c>
      <c r="S33" s="6">
        <v>100.793848682617</v>
      </c>
      <c r="T33" s="6">
        <v>89.6242973068095</v>
      </c>
      <c r="U33" s="6">
        <v>98.6443247536434</v>
      </c>
      <c r="V33" s="6">
        <v>102.328457083941</v>
      </c>
      <c r="W33" s="6">
        <v>113.173512485718</v>
      </c>
      <c r="X33" s="6">
        <v>1.32730858133601</v>
      </c>
      <c r="Y33" s="6">
        <v>0.832022027846108</v>
      </c>
      <c r="Z33" s="6">
        <v>0.769600313941396</v>
      </c>
      <c r="AA33" s="6">
        <v>79.9601681301921</v>
      </c>
      <c r="AB33" s="6">
        <v>87.5882883339056</v>
      </c>
      <c r="AC33" s="6">
        <v>110.728128781872</v>
      </c>
      <c r="AD33" s="6">
        <v>111.103073184466</v>
      </c>
      <c r="AE33" s="6">
        <v>115.584785649243</v>
      </c>
      <c r="AF33" s="6">
        <v>102.438332381765</v>
      </c>
      <c r="AG33" s="6">
        <v>118.146948460157</v>
      </c>
      <c r="AH33" s="6">
        <v>119.794538424375</v>
      </c>
      <c r="AI33" s="6">
        <v>113.234343083166</v>
      </c>
      <c r="AJ33" s="6">
        <v>0.421259926536607</v>
      </c>
      <c r="AK33" s="6">
        <v>1.32223242981979</v>
      </c>
      <c r="AL33" s="6">
        <v>0.672049563232861</v>
      </c>
      <c r="AM33" s="6">
        <v>68.2800042340203</v>
      </c>
      <c r="AN33" s="6">
        <v>84.3016290929268</v>
      </c>
      <c r="AO33" s="6">
        <v>95.6608185573429</v>
      </c>
      <c r="AP33" s="6">
        <v>107.187779793377</v>
      </c>
      <c r="AQ33" s="6">
        <v>105.106543720948</v>
      </c>
      <c r="AR33" s="6">
        <v>100.658768296687</v>
      </c>
      <c r="AS33" s="6">
        <v>104.931144861903</v>
      </c>
      <c r="AT33" s="6">
        <v>101.054713499145</v>
      </c>
      <c r="AU33" s="6">
        <v>111.986041032164</v>
      </c>
      <c r="AV33" s="6">
        <v>0.553570923297116</v>
      </c>
      <c r="AW33" s="6">
        <v>0.878263322130522</v>
      </c>
      <c r="AX33" s="6">
        <v>1.26371482934252</v>
      </c>
      <c r="AY33" s="6">
        <v>75.4512537832781</v>
      </c>
      <c r="AZ33" s="6">
        <v>74.2709497512227</v>
      </c>
      <c r="BA33" s="6">
        <v>75.0816187062934</v>
      </c>
      <c r="BB33" s="6">
        <v>75.1755329085818</v>
      </c>
      <c r="BC33" s="6">
        <v>71.3006953609097</v>
      </c>
      <c r="BD33" s="6">
        <v>71.6002065614567</v>
      </c>
      <c r="BE33" s="6">
        <v>2.78456307840298</v>
      </c>
      <c r="BF33" s="6">
        <v>5.14462156503538</v>
      </c>
      <c r="BG33" s="6">
        <v>2.96035359788317</v>
      </c>
      <c r="BH33" s="6">
        <v>0.549868165497287</v>
      </c>
      <c r="BI33" s="6">
        <v>0.499946093783876</v>
      </c>
      <c r="BJ33" s="6">
        <v>0.888292455549049</v>
      </c>
      <c r="BK33" s="6">
        <v>67.8068548941466</v>
      </c>
      <c r="BL33" s="6">
        <v>66.143855301105</v>
      </c>
      <c r="BM33" s="6">
        <v>63.2274095854522</v>
      </c>
      <c r="BN33" s="6">
        <v>63.7661157918424</v>
      </c>
      <c r="BO33" s="6">
        <v>59.5675854953156</v>
      </c>
      <c r="BP33" s="6">
        <v>60.9633387423768</v>
      </c>
      <c r="BQ33" s="6">
        <v>2.20317061548178</v>
      </c>
      <c r="BR33" s="6">
        <v>2.38739595838513</v>
      </c>
      <c r="BS33" s="6">
        <v>3.74004121681503</v>
      </c>
      <c r="BT33" s="6">
        <v>0.131940901910411</v>
      </c>
      <c r="BU33" s="6">
        <v>0.954939231767014</v>
      </c>
      <c r="BV33" s="6">
        <v>1.48358623313146</v>
      </c>
      <c r="BW33" s="6">
        <v>71.607970249849</v>
      </c>
      <c r="BX33" s="6">
        <v>73.104670800148</v>
      </c>
      <c r="BY33" s="6">
        <v>73.049996556084</v>
      </c>
      <c r="BZ33" s="6">
        <v>72.3227108889916</v>
      </c>
      <c r="CA33" s="6">
        <v>70.2573917492222</v>
      </c>
      <c r="CB33" s="6">
        <v>63.9886177843227</v>
      </c>
      <c r="CC33" s="6">
        <v>2.53235041989956</v>
      </c>
      <c r="CD33" s="6">
        <v>3.5805615815197</v>
      </c>
      <c r="CE33" s="6">
        <v>2.71155306022462</v>
      </c>
      <c r="CF33" s="6">
        <v>0.499307903320982</v>
      </c>
      <c r="CG33" s="6">
        <v>1.5974102446429</v>
      </c>
      <c r="CH33" s="6">
        <v>1.64887734362799</v>
      </c>
      <c r="CI33" s="6">
        <v>62.3935202937378</v>
      </c>
      <c r="CJ33" s="6">
        <v>65.9597152225269</v>
      </c>
      <c r="CK33" s="6">
        <v>61.1839079814232</v>
      </c>
      <c r="CL33" s="6">
        <v>62.9950390593928</v>
      </c>
      <c r="CM33" s="6">
        <v>63.9468765534481</v>
      </c>
      <c r="CN33" s="6">
        <v>47.5425808339314</v>
      </c>
      <c r="CO33" s="6">
        <v>2.27473473984821</v>
      </c>
      <c r="CP33" s="6">
        <v>2.53123348878722</v>
      </c>
      <c r="CQ33" s="6">
        <v>8.46483092065353</v>
      </c>
      <c r="CR33" s="6">
        <v>0.23043798830372</v>
      </c>
      <c r="CS33" s="6">
        <v>0.343413931143687</v>
      </c>
      <c r="CT33" s="6">
        <v>0.88101958048469</v>
      </c>
    </row>
    <row r="34" spans="2:98" ht="15" customHeight="true">
      <c r="B34" s="6">
        <v>81</v>
      </c>
      <c r="C34" s="6">
        <v>90.6053347087575</v>
      </c>
      <c r="D34" s="6">
        <v>87.6566166700717</v>
      </c>
      <c r="E34" s="6">
        <v>131.294473254494</v>
      </c>
      <c r="F34" s="6">
        <v>128.321099353479</v>
      </c>
      <c r="G34" s="6">
        <v>124.199853385494</v>
      </c>
      <c r="H34" s="6">
        <v>126.106648216841</v>
      </c>
      <c r="I34" s="6">
        <v>121.893155596398</v>
      </c>
      <c r="J34" s="6">
        <v>146.416098617718</v>
      </c>
      <c r="K34" s="6">
        <v>141.344275744252</v>
      </c>
      <c r="L34" s="6">
        <v>1.19770008848678</v>
      </c>
      <c r="M34" s="6">
        <v>1.04251001404498</v>
      </c>
      <c r="N34" s="6">
        <v>0.799536084131716</v>
      </c>
      <c r="O34" s="6">
        <v>81.3705684996248</v>
      </c>
      <c r="P34" s="6">
        <v>95.497729035446</v>
      </c>
      <c r="Q34" s="6">
        <v>121.142634652997</v>
      </c>
      <c r="R34" s="6">
        <v>123.823198848424</v>
      </c>
      <c r="S34" s="6">
        <v>136.282206047686</v>
      </c>
      <c r="T34" s="6">
        <v>118.863002666159</v>
      </c>
      <c r="U34" s="6">
        <v>131.89927946013</v>
      </c>
      <c r="V34" s="6">
        <v>142.510851691848</v>
      </c>
      <c r="W34" s="6">
        <v>156.26085924745</v>
      </c>
      <c r="X34" s="6">
        <v>1.5620722210225</v>
      </c>
      <c r="Y34" s="6">
        <v>0.762199088414548</v>
      </c>
      <c r="Z34" s="6">
        <v>1.0618160786737</v>
      </c>
      <c r="AA34" s="6">
        <v>92.9373696006716</v>
      </c>
      <c r="AB34" s="6">
        <v>101.794668467804</v>
      </c>
      <c r="AC34" s="6">
        <v>140.810755326403</v>
      </c>
      <c r="AD34" s="6">
        <v>145.589473522251</v>
      </c>
      <c r="AE34" s="6">
        <v>153.145948625866</v>
      </c>
      <c r="AF34" s="6">
        <v>129.739050705206</v>
      </c>
      <c r="AG34" s="6">
        <v>155.791486754445</v>
      </c>
      <c r="AH34" s="6">
        <v>164.999754274851</v>
      </c>
      <c r="AI34" s="6">
        <v>153.992591990853</v>
      </c>
      <c r="AJ34" s="6">
        <v>0.683122541893624</v>
      </c>
      <c r="AK34" s="6">
        <v>1.46042824950166</v>
      </c>
      <c r="AL34" s="6">
        <v>0.387054101140564</v>
      </c>
      <c r="AM34" s="6">
        <v>77.9432842166741</v>
      </c>
      <c r="AN34" s="6">
        <v>99.200090533105</v>
      </c>
      <c r="AO34" s="6">
        <v>121.170215068944</v>
      </c>
      <c r="AP34" s="6">
        <v>140.647653164496</v>
      </c>
      <c r="AQ34" s="6">
        <v>139.230227045335</v>
      </c>
      <c r="AR34" s="6">
        <v>134.436209407745</v>
      </c>
      <c r="AS34" s="6">
        <v>138.274092918435</v>
      </c>
      <c r="AT34" s="6">
        <v>129.598299790075</v>
      </c>
      <c r="AU34" s="6">
        <v>154.492514755028</v>
      </c>
      <c r="AV34" s="6">
        <v>0.326375684039022</v>
      </c>
      <c r="AW34" s="6">
        <v>0.628261930556732</v>
      </c>
      <c r="AX34" s="6">
        <v>1.25683841326224</v>
      </c>
      <c r="AY34" s="6">
        <v>80.1575237711069</v>
      </c>
      <c r="AZ34" s="6">
        <v>78.5145273644617</v>
      </c>
      <c r="BA34" s="6">
        <v>80.2160009757961</v>
      </c>
      <c r="BB34" s="6">
        <v>80.1263620555549</v>
      </c>
      <c r="BC34" s="6">
        <v>76.3187447552016</v>
      </c>
      <c r="BD34" s="6">
        <v>77.7064533441621</v>
      </c>
      <c r="BE34" s="6">
        <v>1.60574214359951</v>
      </c>
      <c r="BF34" s="6">
        <v>4.27397165989163</v>
      </c>
      <c r="BG34" s="6">
        <v>2.74506763467218</v>
      </c>
      <c r="BH34" s="6">
        <v>0.475876274223651</v>
      </c>
      <c r="BI34" s="6">
        <v>0.191402640178524</v>
      </c>
      <c r="BJ34" s="6">
        <v>0.576363156196919</v>
      </c>
      <c r="BK34" s="6">
        <v>72.3417645147613</v>
      </c>
      <c r="BL34" s="6">
        <v>70.8557417381297</v>
      </c>
      <c r="BM34" s="6">
        <v>67.9217519861112</v>
      </c>
      <c r="BN34" s="6">
        <v>67.9374101077725</v>
      </c>
      <c r="BO34" s="6">
        <v>63.5445086289108</v>
      </c>
      <c r="BP34" s="6">
        <v>65.6497016945982</v>
      </c>
      <c r="BQ34" s="6">
        <v>1.42019937345259</v>
      </c>
      <c r="BR34" s="6">
        <v>2.64894605759071</v>
      </c>
      <c r="BS34" s="6">
        <v>3.90255931062148</v>
      </c>
      <c r="BT34" s="6">
        <v>0.477847850037847</v>
      </c>
      <c r="BU34" s="6">
        <v>1.12328360042494</v>
      </c>
      <c r="BV34" s="6">
        <v>1.14755178743087</v>
      </c>
      <c r="BW34" s="6">
        <v>76.7857965412301</v>
      </c>
      <c r="BX34" s="6">
        <v>78.4533277080006</v>
      </c>
      <c r="BY34" s="6">
        <v>78.0814349777855</v>
      </c>
      <c r="BZ34" s="6">
        <v>77.7496701864344</v>
      </c>
      <c r="CA34" s="6">
        <v>74.1517810065431</v>
      </c>
      <c r="CB34" s="6">
        <v>68.0652734006573</v>
      </c>
      <c r="CC34" s="6">
        <v>2.49567474148222</v>
      </c>
      <c r="CD34" s="6">
        <v>3.06076747355848</v>
      </c>
      <c r="CE34" s="6">
        <v>2.72653534776742</v>
      </c>
      <c r="CF34" s="6">
        <v>0.474293978924266</v>
      </c>
      <c r="CG34" s="6">
        <v>0.771482050812779</v>
      </c>
      <c r="CH34" s="6">
        <v>1.41329050690263</v>
      </c>
      <c r="CI34" s="6">
        <v>66.985207111738</v>
      </c>
      <c r="CJ34" s="6">
        <v>71.6743251933777</v>
      </c>
      <c r="CK34" s="6">
        <v>65.029058464563</v>
      </c>
      <c r="CL34" s="6">
        <v>66.7285085082628</v>
      </c>
      <c r="CM34" s="6">
        <v>68.2038280244738</v>
      </c>
      <c r="CN34" s="6">
        <v>54.8661081169142</v>
      </c>
      <c r="CO34" s="6">
        <v>1.66434922426464</v>
      </c>
      <c r="CP34" s="6">
        <v>2.40905189378867</v>
      </c>
      <c r="CQ34" s="6">
        <v>10.4905238519419</v>
      </c>
      <c r="CR34" s="6">
        <v>0.251360941289192</v>
      </c>
      <c r="CS34" s="6">
        <v>0.252322567428052</v>
      </c>
      <c r="CT34" s="6">
        <v>0.547565300921178</v>
      </c>
    </row>
    <row r="35" spans="2:98" ht="15" customHeight="true">
      <c r="B35" s="6">
        <v>81.5</v>
      </c>
      <c r="C35" s="6">
        <v>102.280807553455</v>
      </c>
      <c r="D35" s="6">
        <v>100.373817849718</v>
      </c>
      <c r="E35" s="6">
        <v>159.223925802431</v>
      </c>
      <c r="F35" s="6">
        <v>159.957463530315</v>
      </c>
      <c r="G35" s="6">
        <v>156.081966416308</v>
      </c>
      <c r="H35" s="6">
        <v>157.857073526243</v>
      </c>
      <c r="I35" s="6">
        <v>153.471164095818</v>
      </c>
      <c r="J35" s="6">
        <v>193.072558880893</v>
      </c>
      <c r="K35" s="6">
        <v>179.395071242138</v>
      </c>
      <c r="L35" s="6">
        <v>1.96579304998136</v>
      </c>
      <c r="M35" s="6">
        <v>0.871578276223431</v>
      </c>
      <c r="N35" s="6">
        <v>0.384441682674776</v>
      </c>
      <c r="O35" s="6">
        <v>91.8187657976294</v>
      </c>
      <c r="P35" s="6">
        <v>108.180051998055</v>
      </c>
      <c r="Q35" s="6">
        <v>147.018276237183</v>
      </c>
      <c r="R35" s="6">
        <v>151.663703245467</v>
      </c>
      <c r="S35" s="6">
        <v>173.279763190473</v>
      </c>
      <c r="T35" s="6">
        <v>149.425539545141</v>
      </c>
      <c r="U35" s="6">
        <v>165.039548416205</v>
      </c>
      <c r="V35" s="6">
        <v>185.347635089257</v>
      </c>
      <c r="W35" s="6">
        <v>201.139083192627</v>
      </c>
      <c r="X35" s="6">
        <v>2.01507361813589</v>
      </c>
      <c r="Y35" s="6">
        <v>1.13714720879727</v>
      </c>
      <c r="Z35" s="6">
        <v>1.27985096428296</v>
      </c>
      <c r="AA35" s="6">
        <v>105.125636718716</v>
      </c>
      <c r="AB35" s="6">
        <v>115.554859199195</v>
      </c>
      <c r="AC35" s="6">
        <v>169.044654357018</v>
      </c>
      <c r="AD35" s="6">
        <v>178.771438272672</v>
      </c>
      <c r="AE35" s="6">
        <v>191.513511698016</v>
      </c>
      <c r="AF35" s="6">
        <v>156.57836436729</v>
      </c>
      <c r="AG35" s="6">
        <v>192.888540364585</v>
      </c>
      <c r="AH35" s="6">
        <v>212.712561325</v>
      </c>
      <c r="AI35" s="6">
        <v>196.294195456338</v>
      </c>
      <c r="AJ35" s="6">
        <v>0.547795723823924</v>
      </c>
      <c r="AK35" s="6">
        <v>1.08870402263989</v>
      </c>
      <c r="AL35" s="6">
        <v>-0.0226318750814585</v>
      </c>
      <c r="AM35" s="6">
        <v>87.2228360524458</v>
      </c>
      <c r="AN35" s="6">
        <v>113.277103258471</v>
      </c>
      <c r="AO35" s="6">
        <v>145.969305249251</v>
      </c>
      <c r="AP35" s="6">
        <v>172.571140077441</v>
      </c>
      <c r="AQ35" s="6">
        <v>172.367332992874</v>
      </c>
      <c r="AR35" s="6">
        <v>168.225862257789</v>
      </c>
      <c r="AS35" s="6">
        <v>170.17085536402</v>
      </c>
      <c r="AT35" s="6">
        <v>156.314300455207</v>
      </c>
      <c r="AU35" s="6">
        <v>199.423804378933</v>
      </c>
      <c r="AV35" s="6">
        <v>-0.172136511400879</v>
      </c>
      <c r="AW35" s="6">
        <v>0.40126874702878</v>
      </c>
      <c r="AX35" s="6">
        <v>0.944234237338606</v>
      </c>
      <c r="AY35" s="6">
        <v>86.5794537907724</v>
      </c>
      <c r="AZ35" s="6">
        <v>84.9305296156755</v>
      </c>
      <c r="BA35" s="6">
        <v>86.6033958701792</v>
      </c>
      <c r="BB35" s="6">
        <v>85.7666183493767</v>
      </c>
      <c r="BC35" s="6">
        <v>82.525650563693</v>
      </c>
      <c r="BD35" s="6">
        <v>84.7093479470738</v>
      </c>
      <c r="BE35" s="6">
        <v>0.527722109138551</v>
      </c>
      <c r="BF35" s="6">
        <v>3.86492625968623</v>
      </c>
      <c r="BG35" s="6">
        <v>2.54643874087679</v>
      </c>
      <c r="BH35" s="6">
        <v>0.333649690593973</v>
      </c>
      <c r="BI35" s="6">
        <v>0.440140257235214</v>
      </c>
      <c r="BJ35" s="6">
        <v>0.500682909430282</v>
      </c>
      <c r="BK35" s="6">
        <v>78.1373982483251</v>
      </c>
      <c r="BL35" s="6">
        <v>76.5202694411816</v>
      </c>
      <c r="BM35" s="6">
        <v>73.7847206368884</v>
      </c>
      <c r="BN35" s="6">
        <v>73.4066501211247</v>
      </c>
      <c r="BO35" s="6">
        <v>69.1622245805801</v>
      </c>
      <c r="BP35" s="6">
        <v>71.5245396780245</v>
      </c>
      <c r="BQ35" s="6">
        <v>1.04218873156566</v>
      </c>
      <c r="BR35" s="6">
        <v>2.71660375572662</v>
      </c>
      <c r="BS35" s="6">
        <v>3.12769906472141</v>
      </c>
      <c r="BT35" s="6">
        <v>0.273347817782224</v>
      </c>
      <c r="BU35" s="6">
        <v>1.06809230585429</v>
      </c>
      <c r="BV35" s="6">
        <v>0.478582515374512</v>
      </c>
      <c r="BW35" s="6">
        <v>83.9395340630156</v>
      </c>
      <c r="BX35" s="6">
        <v>85.1602619972335</v>
      </c>
      <c r="BY35" s="6">
        <v>84.4746757068693</v>
      </c>
      <c r="BZ35" s="6">
        <v>84.463827962821</v>
      </c>
      <c r="CA35" s="6">
        <v>79.3881586710601</v>
      </c>
      <c r="CB35" s="6">
        <v>73.3441795022259</v>
      </c>
      <c r="CC35" s="6">
        <v>2.00054061802081</v>
      </c>
      <c r="CD35" s="6">
        <v>2.91201341779907</v>
      </c>
      <c r="CE35" s="6">
        <v>2.85994512255564</v>
      </c>
      <c r="CF35" s="6">
        <v>0.304724663975094</v>
      </c>
      <c r="CG35" s="6">
        <v>0.15082465047584</v>
      </c>
      <c r="CH35" s="6">
        <v>0.972682477109743</v>
      </c>
      <c r="CI35" s="6">
        <v>72.7575544430124</v>
      </c>
      <c r="CJ35" s="6">
        <v>78.4618066111329</v>
      </c>
      <c r="CK35" s="6">
        <v>69.5499564692139</v>
      </c>
      <c r="CL35" s="6">
        <v>71.4216847776531</v>
      </c>
      <c r="CM35" s="6">
        <v>72.6976309584895</v>
      </c>
      <c r="CN35" s="6">
        <v>63.4074258068435</v>
      </c>
      <c r="CO35" s="6">
        <v>1.59429669929222</v>
      </c>
      <c r="CP35" s="6">
        <v>1.95546310187831</v>
      </c>
      <c r="CQ35" s="6">
        <v>13.6343169605308</v>
      </c>
      <c r="CR35" s="6">
        <v>0.242889039243209</v>
      </c>
      <c r="CS35" s="6">
        <v>0.246577529770946</v>
      </c>
      <c r="CT35" s="6">
        <v>0.679372642710348</v>
      </c>
    </row>
    <row r="36" spans="2:98" ht="15" customHeight="true">
      <c r="B36" s="6">
        <v>82</v>
      </c>
      <c r="C36" s="6">
        <v>110.770337628463</v>
      </c>
      <c r="D36" s="6">
        <v>109.351751435166</v>
      </c>
      <c r="E36" s="6">
        <v>180.827646453993</v>
      </c>
      <c r="F36" s="6">
        <v>184.217203174772</v>
      </c>
      <c r="G36" s="6">
        <v>182.545756964515</v>
      </c>
      <c r="H36" s="6">
        <v>185.396029156106</v>
      </c>
      <c r="I36" s="6">
        <v>179.931914184915</v>
      </c>
      <c r="J36" s="6">
        <v>234.074584113132</v>
      </c>
      <c r="K36" s="6">
        <v>210.087712720024</v>
      </c>
      <c r="L36" s="6">
        <v>2.51631322794202</v>
      </c>
      <c r="M36" s="6">
        <v>0.0984274626908928</v>
      </c>
      <c r="N36" s="6">
        <v>0.601651077269764</v>
      </c>
      <c r="O36" s="6">
        <v>98.7698778763763</v>
      </c>
      <c r="P36" s="6">
        <v>117.530023570638</v>
      </c>
      <c r="Q36" s="6">
        <v>167.05540600307</v>
      </c>
      <c r="R36" s="6">
        <v>172.716737013896</v>
      </c>
      <c r="S36" s="6">
        <v>204.46794555144</v>
      </c>
      <c r="T36" s="6">
        <v>175.735467380836</v>
      </c>
      <c r="U36" s="6">
        <v>192.158529549342</v>
      </c>
      <c r="V36" s="6">
        <v>221.697415036278</v>
      </c>
      <c r="W36" s="6">
        <v>238.04380128895</v>
      </c>
      <c r="X36" s="6">
        <v>2.3012092760012</v>
      </c>
      <c r="Y36" s="6">
        <v>1.40220754772275</v>
      </c>
      <c r="Z36" s="6">
        <v>1.71125246338431</v>
      </c>
      <c r="AA36" s="6">
        <v>113.711330981497</v>
      </c>
      <c r="AB36" s="6">
        <v>125.675837404963</v>
      </c>
      <c r="AC36" s="6">
        <v>189.848474496645</v>
      </c>
      <c r="AD36" s="6">
        <v>204.502608185952</v>
      </c>
      <c r="AE36" s="6">
        <v>222.221509124905</v>
      </c>
      <c r="AF36" s="6">
        <v>179.426915341048</v>
      </c>
      <c r="AG36" s="6">
        <v>222.749893291314</v>
      </c>
      <c r="AH36" s="6">
        <v>252.390562615771</v>
      </c>
      <c r="AI36" s="6">
        <v>230.751517836838</v>
      </c>
      <c r="AJ36" s="6">
        <v>0.50828242702994</v>
      </c>
      <c r="AK36" s="6">
        <v>0.955870045220593</v>
      </c>
      <c r="AL36" s="6">
        <v>0.522806708032761</v>
      </c>
      <c r="AM36" s="6">
        <v>94.4056755894881</v>
      </c>
      <c r="AN36" s="6">
        <v>122.535779628583</v>
      </c>
      <c r="AO36" s="6">
        <v>164.503462837642</v>
      </c>
      <c r="AP36" s="6">
        <v>196.937995126307</v>
      </c>
      <c r="AQ36" s="6">
        <v>198.793109782775</v>
      </c>
      <c r="AR36" s="6">
        <v>195.636122280187</v>
      </c>
      <c r="AS36" s="6">
        <v>195.168652868857</v>
      </c>
      <c r="AT36" s="6">
        <v>177.801088120508</v>
      </c>
      <c r="AU36" s="6">
        <v>236.594677978076</v>
      </c>
      <c r="AV36" s="6">
        <v>-0.0847619396924984</v>
      </c>
      <c r="AW36" s="6">
        <v>0.894905957985429</v>
      </c>
      <c r="AX36" s="6">
        <v>0.436629827366971</v>
      </c>
      <c r="AY36" s="6">
        <v>97.0719492687613</v>
      </c>
      <c r="AZ36" s="6">
        <v>94.722365842632</v>
      </c>
      <c r="BA36" s="6">
        <v>97.1959763389855</v>
      </c>
      <c r="BB36" s="6">
        <v>95.151840502806</v>
      </c>
      <c r="BC36" s="6">
        <v>92.2223344407603</v>
      </c>
      <c r="BD36" s="6">
        <v>94.2174737757051</v>
      </c>
      <c r="BE36" s="6">
        <v>0.123231840929463</v>
      </c>
      <c r="BF36" s="6">
        <v>3.90653455392385</v>
      </c>
      <c r="BG36" s="6">
        <v>2.37470165304427</v>
      </c>
      <c r="BH36" s="6">
        <v>0.827432343117494</v>
      </c>
      <c r="BI36" s="6">
        <v>0.820198209828561</v>
      </c>
      <c r="BJ36" s="6">
        <v>0.822671371392573</v>
      </c>
      <c r="BK36" s="6">
        <v>86.8963900276519</v>
      </c>
      <c r="BL36" s="6">
        <v>86.752383050075</v>
      </c>
      <c r="BM36" s="6">
        <v>82.7559658314624</v>
      </c>
      <c r="BN36" s="6">
        <v>82.1375987096393</v>
      </c>
      <c r="BO36" s="6">
        <v>77.9233501286692</v>
      </c>
      <c r="BP36" s="6">
        <v>80.4703158849472</v>
      </c>
      <c r="BQ36" s="6">
        <v>1.71191304943216</v>
      </c>
      <c r="BR36" s="6">
        <v>2.49526355231353</v>
      </c>
      <c r="BS36" s="6">
        <v>2.35650358458281</v>
      </c>
      <c r="BT36" s="6">
        <v>-0.200822246447672</v>
      </c>
      <c r="BU36" s="6">
        <v>1.28502695819378</v>
      </c>
      <c r="BV36" s="6">
        <v>-0.229977577978786</v>
      </c>
      <c r="BW36" s="6">
        <v>94.7933688671872</v>
      </c>
      <c r="BX36" s="6">
        <v>96.7695445857869</v>
      </c>
      <c r="BY36" s="6">
        <v>94.3721007925112</v>
      </c>
      <c r="BZ36" s="6">
        <v>94.4392856669172</v>
      </c>
      <c r="CA36" s="6">
        <v>88.8328830929549</v>
      </c>
      <c r="CB36" s="6">
        <v>83.0030122909981</v>
      </c>
      <c r="CC36" s="6">
        <v>2.54632182721025</v>
      </c>
      <c r="CD36" s="6">
        <v>3.23534119958356</v>
      </c>
      <c r="CE36" s="6">
        <v>3.10495682963784</v>
      </c>
      <c r="CF36" s="6">
        <v>0.518514608978308</v>
      </c>
      <c r="CG36" s="6">
        <v>0.304819838684921</v>
      </c>
      <c r="CH36" s="6">
        <v>1.17552770764422</v>
      </c>
      <c r="CI36" s="6">
        <v>81.2622528933568</v>
      </c>
      <c r="CJ36" s="6">
        <v>88.5230377824733</v>
      </c>
      <c r="CK36" s="6">
        <v>76.5851413734004</v>
      </c>
      <c r="CL36" s="6">
        <v>78.7043785813992</v>
      </c>
      <c r="CM36" s="6">
        <v>80.5748870127517</v>
      </c>
      <c r="CN36" s="6">
        <v>69.5165680934343</v>
      </c>
      <c r="CO36" s="6">
        <v>1.44251653249677</v>
      </c>
      <c r="CP36" s="6">
        <v>1.4977019010384</v>
      </c>
      <c r="CQ36" s="6">
        <v>16.7353183466389</v>
      </c>
      <c r="CR36" s="6">
        <v>0.438953367410818</v>
      </c>
      <c r="CS36" s="6">
        <v>0.630474782498823</v>
      </c>
      <c r="CT36" s="6">
        <v>1.2836499236364</v>
      </c>
    </row>
    <row r="37" spans="2:98" ht="15" customHeight="true">
      <c r="B37" s="6">
        <v>82.5</v>
      </c>
      <c r="C37" s="6">
        <v>110.935641582859</v>
      </c>
      <c r="D37" s="6">
        <v>109.65325368643</v>
      </c>
      <c r="E37" s="6">
        <v>187.096994100792</v>
      </c>
      <c r="F37" s="6">
        <v>192.923666244719</v>
      </c>
      <c r="G37" s="6">
        <v>195.048017674226</v>
      </c>
      <c r="H37" s="6">
        <v>199.902570384344</v>
      </c>
      <c r="I37" s="6">
        <v>193.556746283515</v>
      </c>
      <c r="J37" s="6">
        <v>257.435786488179</v>
      </c>
      <c r="K37" s="6">
        <v>224.129129885472</v>
      </c>
      <c r="L37" s="6">
        <v>2.91754745044869</v>
      </c>
      <c r="M37" s="6">
        <v>0.134919625530642</v>
      </c>
      <c r="N37" s="6">
        <v>0.66150089675142</v>
      </c>
      <c r="O37" s="6">
        <v>98.7726515151772</v>
      </c>
      <c r="P37" s="6">
        <v>117.945065456798</v>
      </c>
      <c r="Q37" s="6">
        <v>172.444746410284</v>
      </c>
      <c r="R37" s="6">
        <v>180.144485278318</v>
      </c>
      <c r="S37" s="6">
        <v>217.81395333619</v>
      </c>
      <c r="T37" s="6">
        <v>188.425113226943</v>
      </c>
      <c r="U37" s="6">
        <v>203.942372031031</v>
      </c>
      <c r="V37" s="6">
        <v>240.537035115963</v>
      </c>
      <c r="W37" s="6">
        <v>254.2031289205</v>
      </c>
      <c r="X37" s="6">
        <v>1.66721283581666</v>
      </c>
      <c r="Y37" s="6">
        <v>1.06403030957375</v>
      </c>
      <c r="Z37" s="6">
        <v>1.67802266256257</v>
      </c>
      <c r="AA37" s="6">
        <v>114.358687252389</v>
      </c>
      <c r="AB37" s="6">
        <v>126.802043794379</v>
      </c>
      <c r="AC37" s="6">
        <v>195.268651462046</v>
      </c>
      <c r="AD37" s="6">
        <v>212.911119882763</v>
      </c>
      <c r="AE37" s="6">
        <v>234.428306437909</v>
      </c>
      <c r="AF37" s="6">
        <v>189.623504457195</v>
      </c>
      <c r="AG37" s="6">
        <v>233.680752094357</v>
      </c>
      <c r="AH37" s="6">
        <v>272.578962820807</v>
      </c>
      <c r="AI37" s="6">
        <v>245.43321111363</v>
      </c>
      <c r="AJ37" s="6">
        <v>0.813419981515096</v>
      </c>
      <c r="AK37" s="6">
        <v>1.08102885313554</v>
      </c>
      <c r="AL37" s="6">
        <v>0.821063301558638</v>
      </c>
      <c r="AM37" s="6">
        <v>95.6629124217145</v>
      </c>
      <c r="AN37" s="6">
        <v>123.474000147078</v>
      </c>
      <c r="AO37" s="6">
        <v>168.93677641915</v>
      </c>
      <c r="AP37" s="6">
        <v>204.159871839086</v>
      </c>
      <c r="AQ37" s="6">
        <v>207.854890962382</v>
      </c>
      <c r="AR37" s="6">
        <v>207.196097279268</v>
      </c>
      <c r="AS37" s="6">
        <v>204.533106226738</v>
      </c>
      <c r="AT37" s="6">
        <v>185.210328232661</v>
      </c>
      <c r="AU37" s="6">
        <v>253.111423044924</v>
      </c>
      <c r="AV37" s="6">
        <v>0.511837338024861</v>
      </c>
      <c r="AW37" s="6">
        <v>0.593279890511326</v>
      </c>
      <c r="AX37" s="6">
        <v>0.291720821682759</v>
      </c>
      <c r="AY37" s="6">
        <v>116.871932492734</v>
      </c>
      <c r="AZ37" s="6">
        <v>114.221019427682</v>
      </c>
      <c r="BA37" s="6">
        <v>117.107330804734</v>
      </c>
      <c r="BB37" s="6">
        <v>113.179816546856</v>
      </c>
      <c r="BC37" s="6">
        <v>110.099484550956</v>
      </c>
      <c r="BD37" s="6">
        <v>111.450758206323</v>
      </c>
      <c r="BE37" s="6">
        <v>0.350345397504384</v>
      </c>
      <c r="BF37" s="6">
        <v>3.67811352698271</v>
      </c>
      <c r="BG37" s="6">
        <v>2.52402456719113</v>
      </c>
      <c r="BH37" s="6">
        <v>1.13148569777309</v>
      </c>
      <c r="BI37" s="6">
        <v>0.54968532524839</v>
      </c>
      <c r="BJ37" s="6">
        <v>0.584592632653937</v>
      </c>
      <c r="BK37" s="6">
        <v>103.611267765142</v>
      </c>
      <c r="BL37" s="6">
        <v>105.801808733418</v>
      </c>
      <c r="BM37" s="6">
        <v>98.1720234358969</v>
      </c>
      <c r="BN37" s="6">
        <v>99.3558015047828</v>
      </c>
      <c r="BO37" s="6">
        <v>94.0141119323538</v>
      </c>
      <c r="BP37" s="6">
        <v>97.3239257331688</v>
      </c>
      <c r="BQ37" s="6">
        <v>1.93973284237506</v>
      </c>
      <c r="BR37" s="6">
        <v>2.59358042779633</v>
      </c>
      <c r="BS37" s="6">
        <v>2.41591055862068</v>
      </c>
      <c r="BT37" s="6">
        <v>0.543629624064124</v>
      </c>
      <c r="BU37" s="6">
        <v>1.25690585118639</v>
      </c>
      <c r="BV37" s="6">
        <v>-0.310509302607613</v>
      </c>
      <c r="BW37" s="6">
        <v>114.661193318518</v>
      </c>
      <c r="BX37" s="6">
        <v>117.644310161836</v>
      </c>
      <c r="BY37" s="6">
        <v>112.906246787758</v>
      </c>
      <c r="BZ37" s="6">
        <v>113.107118077602</v>
      </c>
      <c r="CA37" s="6">
        <v>106.504669652719</v>
      </c>
      <c r="CB37" s="6">
        <v>100.412271264948</v>
      </c>
      <c r="CC37" s="6">
        <v>3.21641138689603</v>
      </c>
      <c r="CD37" s="6">
        <v>2.71143786861416</v>
      </c>
      <c r="CE37" s="6">
        <v>3.26684983759475</v>
      </c>
      <c r="CF37" s="6">
        <v>1.0401385993195</v>
      </c>
      <c r="CG37" s="6">
        <v>0.415180335843559</v>
      </c>
      <c r="CH37" s="6">
        <v>0.940434684985348</v>
      </c>
      <c r="CI37" s="6">
        <v>97.2667252252001</v>
      </c>
      <c r="CJ37" s="6">
        <v>107.152835618233</v>
      </c>
      <c r="CK37" s="6">
        <v>91.3127928994131</v>
      </c>
      <c r="CL37" s="6">
        <v>94.5009046266081</v>
      </c>
      <c r="CM37" s="6">
        <v>96.2008534091878</v>
      </c>
      <c r="CN37" s="6">
        <v>72.2282454496308</v>
      </c>
      <c r="CO37" s="6">
        <v>1.0731331615587</v>
      </c>
      <c r="CP37" s="6">
        <v>1.55421477031228</v>
      </c>
      <c r="CQ37" s="6">
        <v>19.3703089716757</v>
      </c>
      <c r="CR37" s="6">
        <v>0.452999910873245</v>
      </c>
      <c r="CS37" s="6">
        <v>1.13887840241125</v>
      </c>
      <c r="CT37" s="6">
        <v>1.41337834488303</v>
      </c>
    </row>
    <row r="38" spans="2:98" ht="15" customHeight="true">
      <c r="B38" s="6">
        <v>83</v>
      </c>
      <c r="C38" s="6">
        <v>104.749808670999</v>
      </c>
      <c r="D38" s="6">
        <v>102.882478794526</v>
      </c>
      <c r="E38" s="6">
        <v>171.433849246832</v>
      </c>
      <c r="F38" s="6">
        <v>178.43885672832</v>
      </c>
      <c r="G38" s="6">
        <v>185.359979727596</v>
      </c>
      <c r="H38" s="6">
        <v>191.763392387316</v>
      </c>
      <c r="I38" s="6">
        <v>185.613336731833</v>
      </c>
      <c r="J38" s="6">
        <v>249.060304007</v>
      </c>
      <c r="K38" s="6">
        <v>211.334907396977</v>
      </c>
      <c r="L38" s="6">
        <v>2.68494492371821</v>
      </c>
      <c r="M38" s="6">
        <v>0.549008669494583</v>
      </c>
      <c r="N38" s="6">
        <v>0.447617568341059</v>
      </c>
      <c r="O38" s="6">
        <v>93.1797383405507</v>
      </c>
      <c r="P38" s="6">
        <v>110.815333425437</v>
      </c>
      <c r="Q38" s="6">
        <v>158.036040359772</v>
      </c>
      <c r="R38" s="6">
        <v>166.676332645678</v>
      </c>
      <c r="S38" s="6">
        <v>203.00870980578</v>
      </c>
      <c r="T38" s="6">
        <v>177.971529964812</v>
      </c>
      <c r="U38" s="6">
        <v>190.334573691447</v>
      </c>
      <c r="V38" s="6">
        <v>229.835275931213</v>
      </c>
      <c r="W38" s="6">
        <v>236.76519694443</v>
      </c>
      <c r="X38" s="6">
        <v>1.20854666362465</v>
      </c>
      <c r="Y38" s="6">
        <v>0.981392412532102</v>
      </c>
      <c r="Z38" s="6">
        <v>1.23146272512253</v>
      </c>
      <c r="AA38" s="6">
        <v>108.187402496705</v>
      </c>
      <c r="AB38" s="6">
        <v>121.500226362158</v>
      </c>
      <c r="AC38" s="6">
        <v>179.34393489068</v>
      </c>
      <c r="AD38" s="6">
        <v>194.490294165287</v>
      </c>
      <c r="AE38" s="6">
        <v>217.807903742673</v>
      </c>
      <c r="AF38" s="6">
        <v>180.904621056225</v>
      </c>
      <c r="AG38" s="6">
        <v>215.074408050017</v>
      </c>
      <c r="AH38" s="6">
        <v>258.571397483238</v>
      </c>
      <c r="AI38" s="6">
        <v>229.051696111018</v>
      </c>
      <c r="AJ38" s="6">
        <v>0.845480966606942</v>
      </c>
      <c r="AK38" s="6">
        <v>1.05304298020718</v>
      </c>
      <c r="AL38" s="6">
        <v>0.76747455211256</v>
      </c>
      <c r="AM38" s="6">
        <v>91.3068057316212</v>
      </c>
      <c r="AN38" s="6">
        <v>117.793177546274</v>
      </c>
      <c r="AO38" s="6">
        <v>154.754660150653</v>
      </c>
      <c r="AP38" s="6">
        <v>185.831621562745</v>
      </c>
      <c r="AQ38" s="6">
        <v>190.479807887118</v>
      </c>
      <c r="AR38" s="6">
        <v>192.300582194043</v>
      </c>
      <c r="AS38" s="6">
        <v>190.467305658662</v>
      </c>
      <c r="AT38" s="6">
        <v>170.723132327268</v>
      </c>
      <c r="AU38" s="6">
        <v>236.995181464434</v>
      </c>
      <c r="AV38" s="6">
        <v>0.98015832694773</v>
      </c>
      <c r="AW38" s="6">
        <v>0.21724594855425</v>
      </c>
      <c r="AX38" s="6">
        <v>0.351635509276377</v>
      </c>
      <c r="AY38" s="6">
        <v>144.979374856229</v>
      </c>
      <c r="AZ38" s="6">
        <v>142.070542037865</v>
      </c>
      <c r="BA38" s="6">
        <v>143.015143462565</v>
      </c>
      <c r="BB38" s="6">
        <v>137.886257614518</v>
      </c>
      <c r="BC38" s="6">
        <v>133.099440472637</v>
      </c>
      <c r="BD38" s="6">
        <v>134.852218963117</v>
      </c>
      <c r="BE38" s="6">
        <v>0.696875502677415</v>
      </c>
      <c r="BF38" s="6">
        <v>3.37411763922256</v>
      </c>
      <c r="BG38" s="6">
        <v>3.11090589712387</v>
      </c>
      <c r="BH38" s="6">
        <v>0.661513194382167</v>
      </c>
      <c r="BI38" s="6">
        <v>0.348136735122068</v>
      </c>
      <c r="BJ38" s="6">
        <v>0.235097626862341</v>
      </c>
      <c r="BK38" s="6">
        <v>128.180435652372</v>
      </c>
      <c r="BL38" s="6">
        <v>130.991618613082</v>
      </c>
      <c r="BM38" s="6">
        <v>118.691782787765</v>
      </c>
      <c r="BN38" s="6">
        <v>122.806851581808</v>
      </c>
      <c r="BO38" s="6">
        <v>114.839402439864</v>
      </c>
      <c r="BP38" s="6">
        <v>118.793655056326</v>
      </c>
      <c r="BQ38" s="6">
        <v>1.56131154011496</v>
      </c>
      <c r="BR38" s="6">
        <v>2.92215303970551</v>
      </c>
      <c r="BS38" s="6">
        <v>2.36296127287346</v>
      </c>
      <c r="BT38" s="6">
        <v>1.42448581804496</v>
      </c>
      <c r="BU38" s="6">
        <v>0.873448716207918</v>
      </c>
      <c r="BV38" s="6">
        <v>-0.85283887645727</v>
      </c>
      <c r="BW38" s="6">
        <v>142.349717228501</v>
      </c>
      <c r="BX38" s="6">
        <v>145.088951074567</v>
      </c>
      <c r="BY38" s="6">
        <v>137.563932603044</v>
      </c>
      <c r="BZ38" s="6">
        <v>138.352021968485</v>
      </c>
      <c r="CA38" s="6">
        <v>129.799798558655</v>
      </c>
      <c r="CB38" s="6">
        <v>121.453047758807</v>
      </c>
      <c r="CC38" s="6">
        <v>2.61284926792229</v>
      </c>
      <c r="CD38" s="6">
        <v>2.45144020517699</v>
      </c>
      <c r="CE38" s="6">
        <v>2.90272702964023</v>
      </c>
      <c r="CF38" s="6">
        <v>0.961215231464962</v>
      </c>
      <c r="CG38" s="6">
        <v>0.0705996037233945</v>
      </c>
      <c r="CH38" s="6">
        <v>0.476158619553644</v>
      </c>
      <c r="CI38" s="6">
        <v>120.313609460443</v>
      </c>
      <c r="CJ38" s="6">
        <v>132.177677457801</v>
      </c>
      <c r="CK38" s="6">
        <v>111.955792516293</v>
      </c>
      <c r="CL38" s="6">
        <v>116.822306299827</v>
      </c>
      <c r="CM38" s="6">
        <v>116.115589441508</v>
      </c>
      <c r="CN38" s="6">
        <v>71.1147338507613</v>
      </c>
      <c r="CO38" s="6">
        <v>1.23412146869583</v>
      </c>
      <c r="CP38" s="6">
        <v>1.92098171545342</v>
      </c>
      <c r="CQ38" s="6">
        <v>21.0846228434848</v>
      </c>
      <c r="CR38" s="6">
        <v>0.449493479981129</v>
      </c>
      <c r="CS38" s="6">
        <v>1.46230140004644</v>
      </c>
      <c r="CT38" s="6">
        <v>0.956695446688059</v>
      </c>
    </row>
    <row r="39" spans="2:98" ht="15" customHeight="true">
      <c r="B39" s="6">
        <v>83.5</v>
      </c>
      <c r="C39" s="6">
        <v>100.207540429312</v>
      </c>
      <c r="D39" s="6">
        <v>96.3520784096966</v>
      </c>
      <c r="E39" s="6">
        <v>143.237060070176</v>
      </c>
      <c r="F39" s="6">
        <v>146.743422386672</v>
      </c>
      <c r="G39" s="6">
        <v>157.254624021434</v>
      </c>
      <c r="H39" s="6">
        <v>165.245595778706</v>
      </c>
      <c r="I39" s="6">
        <v>159.463667089463</v>
      </c>
      <c r="J39" s="6">
        <v>208.794890346444</v>
      </c>
      <c r="K39" s="6">
        <v>176.65627540896</v>
      </c>
      <c r="L39" s="6">
        <v>1.93834449377033</v>
      </c>
      <c r="M39" s="6">
        <v>0.56289905094394</v>
      </c>
      <c r="N39" s="6">
        <v>0.842387960350948</v>
      </c>
      <c r="O39" s="6">
        <v>87.9059217912763</v>
      </c>
      <c r="P39" s="6">
        <v>104.697836500224</v>
      </c>
      <c r="Q39" s="6">
        <v>132.690820166933</v>
      </c>
      <c r="R39" s="6">
        <v>139.387364856608</v>
      </c>
      <c r="S39" s="6">
        <v>166.482311455039</v>
      </c>
      <c r="T39" s="6">
        <v>149.608795557632</v>
      </c>
      <c r="U39" s="6">
        <v>157.895397252553</v>
      </c>
      <c r="V39" s="6">
        <v>191.910638256846</v>
      </c>
      <c r="W39" s="6">
        <v>191.436751966656</v>
      </c>
      <c r="X39" s="6">
        <v>0.920137884314897</v>
      </c>
      <c r="Y39" s="6">
        <v>1.26216209989349</v>
      </c>
      <c r="Z39" s="6">
        <v>1.04919558017548</v>
      </c>
      <c r="AA39" s="6">
        <v>101.930671009553</v>
      </c>
      <c r="AB39" s="6">
        <v>117.549274715726</v>
      </c>
      <c r="AC39" s="6">
        <v>151.083104334643</v>
      </c>
      <c r="AD39" s="6">
        <v>158.131806158222</v>
      </c>
      <c r="AE39" s="6">
        <v>179.162407559119</v>
      </c>
      <c r="AF39" s="6">
        <v>161.834047496092</v>
      </c>
      <c r="AG39" s="6">
        <v>176.547196092129</v>
      </c>
      <c r="AH39" s="6">
        <v>213.436248671883</v>
      </c>
      <c r="AI39" s="6">
        <v>186.883797743381</v>
      </c>
      <c r="AJ39" s="6">
        <v>0.857296255846279</v>
      </c>
      <c r="AK39" s="6">
        <v>0.783043701433485</v>
      </c>
      <c r="AL39" s="6">
        <v>1.01562414893544</v>
      </c>
      <c r="AM39" s="6">
        <v>86.8253016925785</v>
      </c>
      <c r="AN39" s="6">
        <v>110.746639626703</v>
      </c>
      <c r="AO39" s="6">
        <v>129.863708421184</v>
      </c>
      <c r="AP39" s="6">
        <v>151.913190077672</v>
      </c>
      <c r="AQ39" s="6">
        <v>155.994349542412</v>
      </c>
      <c r="AR39" s="6">
        <v>158.236485675044</v>
      </c>
      <c r="AS39" s="6">
        <v>161.876274167174</v>
      </c>
      <c r="AT39" s="6">
        <v>143.527901005025</v>
      </c>
      <c r="AU39" s="6">
        <v>193.099750793564</v>
      </c>
      <c r="AV39" s="6">
        <v>1.22151255855169</v>
      </c>
      <c r="AW39" s="6">
        <v>0.58372250996581</v>
      </c>
      <c r="AX39" s="6">
        <v>0.542249425278499</v>
      </c>
      <c r="AY39" s="6">
        <v>171.696312965452</v>
      </c>
      <c r="AZ39" s="6">
        <v>168.152065117135</v>
      </c>
      <c r="BA39" s="6">
        <v>165.941303961125</v>
      </c>
      <c r="BB39" s="6">
        <v>160.950539126062</v>
      </c>
      <c r="BC39" s="6">
        <v>153.027867223187</v>
      </c>
      <c r="BD39" s="6">
        <v>156.075426232468</v>
      </c>
      <c r="BE39" s="6">
        <v>1.21387570949412</v>
      </c>
      <c r="BF39" s="6">
        <v>3.27438062390502</v>
      </c>
      <c r="BG39" s="6">
        <v>3.67032250339037</v>
      </c>
      <c r="BH39" s="6">
        <v>0.279066047953108</v>
      </c>
      <c r="BI39" s="6">
        <v>1.1548902393626</v>
      </c>
      <c r="BJ39" s="6">
        <v>0.15608289556161</v>
      </c>
      <c r="BK39" s="6">
        <v>152.658466724641</v>
      </c>
      <c r="BL39" s="6">
        <v>155.482576110365</v>
      </c>
      <c r="BM39" s="6">
        <v>137.663939583036</v>
      </c>
      <c r="BN39" s="6">
        <v>143.77391560802</v>
      </c>
      <c r="BO39" s="6">
        <v>132.87437420524</v>
      </c>
      <c r="BP39" s="6">
        <v>136.831892639769</v>
      </c>
      <c r="BQ39" s="6">
        <v>2.29602228113805</v>
      </c>
      <c r="BR39" s="6">
        <v>2.90785724638471</v>
      </c>
      <c r="BS39" s="6">
        <v>2.18585091728914</v>
      </c>
      <c r="BT39" s="6">
        <v>1.39723643309082</v>
      </c>
      <c r="BU39" s="6">
        <v>0.664522473329384</v>
      </c>
      <c r="BV39" s="6">
        <v>-0.978324431140834</v>
      </c>
      <c r="BW39" s="6">
        <v>169.068633795516</v>
      </c>
      <c r="BX39" s="6">
        <v>170.963577569972</v>
      </c>
      <c r="BY39" s="6">
        <v>159.627018081534</v>
      </c>
      <c r="BZ39" s="6">
        <v>160.548466416231</v>
      </c>
      <c r="CA39" s="6">
        <v>150.214027824376</v>
      </c>
      <c r="CB39" s="6">
        <v>138.857765693331</v>
      </c>
      <c r="CC39" s="6">
        <v>2.57901903230311</v>
      </c>
      <c r="CD39" s="6">
        <v>2.78076499984974</v>
      </c>
      <c r="CE39" s="6">
        <v>2.29313144273721</v>
      </c>
      <c r="CF39" s="6">
        <v>0.909330791178888</v>
      </c>
      <c r="CG39" s="6">
        <v>0.377521724772066</v>
      </c>
      <c r="CH39" s="6">
        <v>0.834806167308159</v>
      </c>
      <c r="CI39" s="6">
        <v>142.855470323921</v>
      </c>
      <c r="CJ39" s="6">
        <v>154.892197534452</v>
      </c>
      <c r="CK39" s="6">
        <v>130.546210754679</v>
      </c>
      <c r="CL39" s="6">
        <v>136.645981467629</v>
      </c>
      <c r="CM39" s="6">
        <v>133.826021459912</v>
      </c>
      <c r="CN39" s="6">
        <v>61.9889614849349</v>
      </c>
      <c r="CO39" s="6">
        <v>1.53779741425194</v>
      </c>
      <c r="CP39" s="6">
        <v>2.07496435739944</v>
      </c>
      <c r="CQ39" s="6">
        <v>19.4706064614419</v>
      </c>
      <c r="CR39" s="6">
        <v>0.405895852566118</v>
      </c>
      <c r="CS39" s="6">
        <v>1.57242437536854</v>
      </c>
      <c r="CT39" s="6">
        <v>1.14709944635996</v>
      </c>
    </row>
    <row r="40" spans="2:98" ht="15" customHeight="true">
      <c r="B40" s="6">
        <v>84</v>
      </c>
      <c r="C40" s="6">
        <v>100.962606017517</v>
      </c>
      <c r="D40" s="6">
        <v>93.7358014946878</v>
      </c>
      <c r="E40" s="6">
        <v>115.198734070608</v>
      </c>
      <c r="F40" s="6">
        <v>112.082851709969</v>
      </c>
      <c r="G40" s="6">
        <v>124.069735672315</v>
      </c>
      <c r="H40" s="6">
        <v>133.261733906815</v>
      </c>
      <c r="I40" s="6">
        <v>128.589964771096</v>
      </c>
      <c r="J40" s="6">
        <v>154.374582531723</v>
      </c>
      <c r="K40" s="6">
        <v>136.222468071311</v>
      </c>
      <c r="L40" s="6">
        <v>1.51595514807741</v>
      </c>
      <c r="M40" s="6">
        <v>0.72670040984076</v>
      </c>
      <c r="N40" s="6">
        <v>1.48764022419272</v>
      </c>
      <c r="O40" s="6">
        <v>86.1242954206592</v>
      </c>
      <c r="P40" s="6">
        <v>103.619701846194</v>
      </c>
      <c r="Q40" s="6">
        <v>107.59718811476</v>
      </c>
      <c r="R40" s="6">
        <v>111.753818930981</v>
      </c>
      <c r="S40" s="6">
        <v>123.615066402565</v>
      </c>
      <c r="T40" s="6">
        <v>116.734337839404</v>
      </c>
      <c r="U40" s="6">
        <v>120.984847209371</v>
      </c>
      <c r="V40" s="6">
        <v>142.340597412698</v>
      </c>
      <c r="W40" s="6">
        <v>136.662585469632</v>
      </c>
      <c r="X40" s="6">
        <v>0.460019605042703</v>
      </c>
      <c r="Y40" s="6">
        <v>1.16735306936698</v>
      </c>
      <c r="Z40" s="6">
        <v>0.933769738930323</v>
      </c>
      <c r="AA40" s="6">
        <v>99.9333924684685</v>
      </c>
      <c r="AB40" s="6">
        <v>117.484056014642</v>
      </c>
      <c r="AC40" s="6">
        <v>123.959722984322</v>
      </c>
      <c r="AD40" s="6">
        <v>120.659526375375</v>
      </c>
      <c r="AE40" s="6">
        <v>135.948130262521</v>
      </c>
      <c r="AF40" s="6">
        <v>142.789543397427</v>
      </c>
      <c r="AG40" s="6">
        <v>135.481556054971</v>
      </c>
      <c r="AH40" s="6">
        <v>157.097671653731</v>
      </c>
      <c r="AI40" s="6">
        <v>136.20066123944</v>
      </c>
      <c r="AJ40" s="6">
        <v>1.07811686855769</v>
      </c>
      <c r="AK40" s="6">
        <v>1.14644838256407</v>
      </c>
      <c r="AL40" s="6">
        <v>0.925782233282519</v>
      </c>
      <c r="AM40" s="6">
        <v>85.4635704284507</v>
      </c>
      <c r="AN40" s="6">
        <v>107.007470033938</v>
      </c>
      <c r="AO40" s="6">
        <v>105.469850337055</v>
      </c>
      <c r="AP40" s="6">
        <v>117.417518777957</v>
      </c>
      <c r="AQ40" s="6">
        <v>119.398160337795</v>
      </c>
      <c r="AR40" s="6">
        <v>121.338693053209</v>
      </c>
      <c r="AS40" s="6">
        <v>131.916541521956</v>
      </c>
      <c r="AT40" s="6">
        <v>117.613155345095</v>
      </c>
      <c r="AU40" s="6">
        <v>138.40172542988</v>
      </c>
      <c r="AV40" s="6">
        <v>1.37791159821813</v>
      </c>
      <c r="AW40" s="6">
        <v>0.561210108118985</v>
      </c>
      <c r="AX40" s="6">
        <v>1.19031468177144</v>
      </c>
      <c r="AY40" s="6">
        <v>191.273211364696</v>
      </c>
      <c r="AZ40" s="6">
        <v>187.388008822477</v>
      </c>
      <c r="BA40" s="6">
        <v>182.124518171928</v>
      </c>
      <c r="BB40" s="6">
        <v>177.651279029043</v>
      </c>
      <c r="BC40" s="6">
        <v>166.483962609392</v>
      </c>
      <c r="BD40" s="6">
        <v>170.551903163145</v>
      </c>
      <c r="BE40" s="6">
        <v>2.05732780584418</v>
      </c>
      <c r="BF40" s="6">
        <v>3.13622572421883</v>
      </c>
      <c r="BG40" s="6">
        <v>3.52012843844301</v>
      </c>
      <c r="BH40" s="6">
        <v>0.370551749523429</v>
      </c>
      <c r="BI40" s="6">
        <v>1.69985752380484</v>
      </c>
      <c r="BJ40" s="6">
        <v>0.0407862616931425</v>
      </c>
      <c r="BK40" s="6">
        <v>170.388159756852</v>
      </c>
      <c r="BL40" s="6">
        <v>174.955417513574</v>
      </c>
      <c r="BM40" s="6">
        <v>150.101072253712</v>
      </c>
      <c r="BN40" s="6">
        <v>158.756770347819</v>
      </c>
      <c r="BO40" s="6">
        <v>145.008414882458</v>
      </c>
      <c r="BP40" s="6">
        <v>148.739802923475</v>
      </c>
      <c r="BQ40" s="6">
        <v>3.00991714857241</v>
      </c>
      <c r="BR40" s="6">
        <v>3.28090204053359</v>
      </c>
      <c r="BS40" s="6">
        <v>2.79107758547809</v>
      </c>
      <c r="BT40" s="6">
        <v>1.45558186332448</v>
      </c>
      <c r="BU40" s="6">
        <v>0.647492405551532</v>
      </c>
      <c r="BV40" s="6">
        <v>0.0715827166526992</v>
      </c>
      <c r="BW40" s="6">
        <v>188.689843261126</v>
      </c>
      <c r="BX40" s="6">
        <v>189.725567078658</v>
      </c>
      <c r="BY40" s="6">
        <v>175.249471055531</v>
      </c>
      <c r="BZ40" s="6">
        <v>175.595398102287</v>
      </c>
      <c r="CA40" s="6">
        <v>164.161291926011</v>
      </c>
      <c r="CB40" s="6">
        <v>150.242317626986</v>
      </c>
      <c r="CC40" s="6">
        <v>3.44140031433119</v>
      </c>
      <c r="CD40" s="6">
        <v>2.81095689137067</v>
      </c>
      <c r="CE40" s="6">
        <v>2.17791029352594</v>
      </c>
      <c r="CF40" s="6">
        <v>1.58252673203174</v>
      </c>
      <c r="CG40" s="6">
        <v>0.987806249689925</v>
      </c>
      <c r="CH40" s="6">
        <v>1.05650958560921</v>
      </c>
      <c r="CI40" s="6">
        <v>159.131782356051</v>
      </c>
      <c r="CJ40" s="6">
        <v>171.706456559969</v>
      </c>
      <c r="CK40" s="6">
        <v>143.728902210382</v>
      </c>
      <c r="CL40" s="6">
        <v>150.614840956253</v>
      </c>
      <c r="CM40" s="6">
        <v>145.763944179577</v>
      </c>
      <c r="CN40" s="6">
        <v>46.4770251598642</v>
      </c>
      <c r="CO40" s="6">
        <v>1.63070999974656</v>
      </c>
      <c r="CP40" s="6">
        <v>2.42840438490924</v>
      </c>
      <c r="CQ40" s="6">
        <v>14.9140367842543</v>
      </c>
      <c r="CR40" s="6">
        <v>0.550786090481552</v>
      </c>
      <c r="CS40" s="6">
        <v>1.66079874977726</v>
      </c>
      <c r="CT40" s="6">
        <v>1.49174888482821</v>
      </c>
    </row>
    <row r="41" spans="2:98" ht="15" customHeight="true">
      <c r="B41" s="6">
        <v>84.5</v>
      </c>
      <c r="C41" s="6">
        <v>107.342877251687</v>
      </c>
      <c r="D41" s="6">
        <v>95.6270601214163</v>
      </c>
      <c r="E41" s="6">
        <v>92.756516453674</v>
      </c>
      <c r="F41" s="6">
        <v>82.4140670056174</v>
      </c>
      <c r="G41" s="6">
        <v>94.5972621742986</v>
      </c>
      <c r="H41" s="6">
        <v>104.877097117783</v>
      </c>
      <c r="I41" s="6">
        <v>101.073926020661</v>
      </c>
      <c r="J41" s="6">
        <v>100.496906482399</v>
      </c>
      <c r="K41" s="6">
        <v>99.3965598035189</v>
      </c>
      <c r="L41" s="6">
        <v>1.03013222563754</v>
      </c>
      <c r="M41" s="6">
        <v>1.01663698230175</v>
      </c>
      <c r="N41" s="6">
        <v>1.29195331841578</v>
      </c>
      <c r="O41" s="6">
        <v>89.2041313648613</v>
      </c>
      <c r="P41" s="6">
        <v>108.36656488437</v>
      </c>
      <c r="Q41" s="6">
        <v>88.8484603438595</v>
      </c>
      <c r="R41" s="6">
        <v>90.4129355930978</v>
      </c>
      <c r="S41" s="6">
        <v>83.9686930739859</v>
      </c>
      <c r="T41" s="6">
        <v>88.5956019707502</v>
      </c>
      <c r="U41" s="6">
        <v>87.7164432247855</v>
      </c>
      <c r="V41" s="6">
        <v>93.8366805041001</v>
      </c>
      <c r="W41" s="6">
        <v>83.9831212766413</v>
      </c>
      <c r="X41" s="6">
        <v>0.12129867941178</v>
      </c>
      <c r="Y41" s="6">
        <v>0.969716797227136</v>
      </c>
      <c r="Z41" s="6">
        <v>0.387108042713578</v>
      </c>
      <c r="AA41" s="6">
        <v>103.692003730694</v>
      </c>
      <c r="AB41" s="6">
        <v>122.77941001058</v>
      </c>
      <c r="AC41" s="6">
        <v>104.481157424476</v>
      </c>
      <c r="AD41" s="6">
        <v>89.1366753037581</v>
      </c>
      <c r="AE41" s="6">
        <v>98.8721970202744</v>
      </c>
      <c r="AF41" s="6">
        <v>126.734929494581</v>
      </c>
      <c r="AG41" s="6">
        <v>100.512555024529</v>
      </c>
      <c r="AH41" s="6">
        <v>103.612042382101</v>
      </c>
      <c r="AI41" s="6">
        <v>89.1818409687634</v>
      </c>
      <c r="AJ41" s="6">
        <v>0.725934361934321</v>
      </c>
      <c r="AK41" s="6">
        <v>1.22666502029432</v>
      </c>
      <c r="AL41" s="6">
        <v>0.576350281843702</v>
      </c>
      <c r="AM41" s="6">
        <v>88.2130360864189</v>
      </c>
      <c r="AN41" s="6">
        <v>109.707783182375</v>
      </c>
      <c r="AO41" s="6">
        <v>87.7632395391809</v>
      </c>
      <c r="AP41" s="6">
        <v>88.333313472054</v>
      </c>
      <c r="AQ41" s="6">
        <v>87.6506707227118</v>
      </c>
      <c r="AR41" s="6">
        <v>89.0294336555706</v>
      </c>
      <c r="AS41" s="6">
        <v>106.297175898411</v>
      </c>
      <c r="AT41" s="6">
        <v>97.8216847060726</v>
      </c>
      <c r="AU41" s="6">
        <v>85.0609420974847</v>
      </c>
      <c r="AV41" s="6">
        <v>1.57879848073725</v>
      </c>
      <c r="AW41" s="6">
        <v>0.342298267985314</v>
      </c>
      <c r="AX41" s="6">
        <v>1.59938936737166</v>
      </c>
      <c r="AY41" s="6">
        <v>198.35947139451</v>
      </c>
      <c r="AZ41" s="6">
        <v>194.635973121573</v>
      </c>
      <c r="BA41" s="6">
        <v>186.050744525641</v>
      </c>
      <c r="BB41" s="6">
        <v>182.844601058642</v>
      </c>
      <c r="BC41" s="6">
        <v>168.766216941712</v>
      </c>
      <c r="BD41" s="6">
        <v>174.130483905346</v>
      </c>
      <c r="BE41" s="6">
        <v>2.55697591679865</v>
      </c>
      <c r="BF41" s="6">
        <v>3.27895890639968</v>
      </c>
      <c r="BG41" s="6">
        <v>3.40640666970052</v>
      </c>
      <c r="BH41" s="6">
        <v>0.0658702079422255</v>
      </c>
      <c r="BI41" s="6">
        <v>1.73151527780783</v>
      </c>
      <c r="BJ41" s="6">
        <v>-0.681295323212566</v>
      </c>
      <c r="BK41" s="6">
        <v>177.680604268619</v>
      </c>
      <c r="BL41" s="6">
        <v>182.396410301947</v>
      </c>
      <c r="BM41" s="6">
        <v>152.646732805015</v>
      </c>
      <c r="BN41" s="6">
        <v>163.038303974757</v>
      </c>
      <c r="BO41" s="6">
        <v>147.308247175205</v>
      </c>
      <c r="BP41" s="6">
        <v>150.000157910721</v>
      </c>
      <c r="BQ41" s="6">
        <v>2.46360877289027</v>
      </c>
      <c r="BR41" s="6">
        <v>3.87171003061422</v>
      </c>
      <c r="BS41" s="6">
        <v>3.41797640342151</v>
      </c>
      <c r="BT41" s="6">
        <v>1.71623988011078</v>
      </c>
      <c r="BU41" s="6">
        <v>0.253538435319172</v>
      </c>
      <c r="BV41" s="6">
        <v>0.91092529002384</v>
      </c>
      <c r="BW41" s="6">
        <v>195.866624822312</v>
      </c>
      <c r="BX41" s="6">
        <v>195.308280198387</v>
      </c>
      <c r="BY41" s="6">
        <v>179.33000355852</v>
      </c>
      <c r="BZ41" s="6">
        <v>179.340148509186</v>
      </c>
      <c r="CA41" s="6">
        <v>165.942970584196</v>
      </c>
      <c r="CB41" s="6">
        <v>149.787916323184</v>
      </c>
      <c r="CC41" s="6">
        <v>3.08913831401588</v>
      </c>
      <c r="CD41" s="6">
        <v>2.58279281860706</v>
      </c>
      <c r="CE41" s="6">
        <v>2.45361155380175</v>
      </c>
      <c r="CF41" s="6">
        <v>1.46217790432814</v>
      </c>
      <c r="CG41" s="6">
        <v>0.691290708597194</v>
      </c>
      <c r="CH41" s="6">
        <v>0.512381497798742</v>
      </c>
      <c r="CI41" s="6">
        <v>165.349623258997</v>
      </c>
      <c r="CJ41" s="6">
        <v>176.897098829458</v>
      </c>
      <c r="CK41" s="6">
        <v>147.4610222001</v>
      </c>
      <c r="CL41" s="6">
        <v>154.831808566929</v>
      </c>
      <c r="CM41" s="6">
        <v>146.616090863299</v>
      </c>
      <c r="CN41" s="6">
        <v>31.281299847162</v>
      </c>
      <c r="CO41" s="6">
        <v>1.62708120655651</v>
      </c>
      <c r="CP41" s="6">
        <v>3.16801597585953</v>
      </c>
      <c r="CQ41" s="6">
        <v>10.7415231625551</v>
      </c>
      <c r="CR41" s="6">
        <v>0.974196551484738</v>
      </c>
      <c r="CS41" s="6">
        <v>1.3173595548393</v>
      </c>
      <c r="CT41" s="6">
        <v>1.28896870474404</v>
      </c>
    </row>
    <row r="42" spans="2:98" ht="15" customHeight="true">
      <c r="B42" s="6">
        <v>85</v>
      </c>
      <c r="C42" s="6">
        <v>118.218701868965</v>
      </c>
      <c r="D42" s="6">
        <v>103.410061590999</v>
      </c>
      <c r="E42" s="6">
        <v>78.39732436414</v>
      </c>
      <c r="F42" s="6">
        <v>62.2960634517698</v>
      </c>
      <c r="G42" s="6">
        <v>73.7470737149715</v>
      </c>
      <c r="H42" s="6">
        <v>85.6488330072185</v>
      </c>
      <c r="I42" s="6">
        <v>81.3754507902636</v>
      </c>
      <c r="J42" s="6">
        <v>56.1254612811194</v>
      </c>
      <c r="K42" s="6">
        <v>71.3358528408993</v>
      </c>
      <c r="L42" s="6">
        <v>0.662201442824767</v>
      </c>
      <c r="M42" s="6">
        <v>1.05282333217963</v>
      </c>
      <c r="N42" s="6">
        <v>1.00630378335723</v>
      </c>
      <c r="O42" s="6">
        <v>97.4585839638767</v>
      </c>
      <c r="P42" s="6">
        <v>119.216913813208</v>
      </c>
      <c r="Q42" s="6">
        <v>79.3840249016628</v>
      </c>
      <c r="R42" s="6">
        <v>77.5236146608499</v>
      </c>
      <c r="S42" s="6">
        <v>54.6550922390296</v>
      </c>
      <c r="T42" s="6">
        <v>71.3302652380891</v>
      </c>
      <c r="U42" s="6">
        <v>64.2874470950281</v>
      </c>
      <c r="V42" s="6">
        <v>54.8528160153215</v>
      </c>
      <c r="W42" s="6">
        <v>42.09526368131</v>
      </c>
      <c r="X42" s="6">
        <v>0.375384312903748</v>
      </c>
      <c r="Y42" s="6">
        <v>1.14488067936139</v>
      </c>
      <c r="Z42" s="6">
        <v>0.33483277827213</v>
      </c>
      <c r="AA42" s="6">
        <v>114.112684622858</v>
      </c>
      <c r="AB42" s="6">
        <v>133.253508568408</v>
      </c>
      <c r="AC42" s="6">
        <v>94.7706236898332</v>
      </c>
      <c r="AD42" s="6">
        <v>68.8742404378916</v>
      </c>
      <c r="AE42" s="6">
        <v>73.5558439884267</v>
      </c>
      <c r="AF42" s="6">
        <v>116.976586982186</v>
      </c>
      <c r="AG42" s="6">
        <v>77.7660122332745</v>
      </c>
      <c r="AH42" s="6">
        <v>60.1103962195559</v>
      </c>
      <c r="AI42" s="6">
        <v>53.7957718791108</v>
      </c>
      <c r="AJ42" s="6">
        <v>0.73243027237703</v>
      </c>
      <c r="AK42" s="6">
        <v>0.435860498571913</v>
      </c>
      <c r="AL42" s="6">
        <v>0.686025992551947</v>
      </c>
      <c r="AM42" s="6">
        <v>96.2363881078132</v>
      </c>
      <c r="AN42" s="6">
        <v>117.938254676144</v>
      </c>
      <c r="AO42" s="6">
        <v>78.9219871961568</v>
      </c>
      <c r="AP42" s="6">
        <v>69.947142624681</v>
      </c>
      <c r="AQ42" s="6">
        <v>66.5722150609542</v>
      </c>
      <c r="AR42" s="6">
        <v>67.4553430386112</v>
      </c>
      <c r="AS42" s="6">
        <v>89.6318709228094</v>
      </c>
      <c r="AT42" s="6">
        <v>87.1718121591696</v>
      </c>
      <c r="AU42" s="6">
        <v>43.0321850466379</v>
      </c>
      <c r="AV42" s="6">
        <v>1.37555121487333</v>
      </c>
      <c r="AW42" s="6">
        <v>0.850220406788537</v>
      </c>
      <c r="AX42" s="6">
        <v>1.88146927325835</v>
      </c>
      <c r="AY42" s="6">
        <v>181.250209061365</v>
      </c>
      <c r="AZ42" s="6">
        <v>177.394029633662</v>
      </c>
      <c r="BA42" s="6">
        <v>165.030330323862</v>
      </c>
      <c r="BB42" s="6">
        <v>165.222041398067</v>
      </c>
      <c r="BC42" s="6">
        <v>148.913761204617</v>
      </c>
      <c r="BD42" s="6">
        <v>155.792477148367</v>
      </c>
      <c r="BE42" s="6">
        <v>2.75940517706789</v>
      </c>
      <c r="BF42" s="6">
        <v>3.33070653239253</v>
      </c>
      <c r="BG42" s="6">
        <v>3.29783965103928</v>
      </c>
      <c r="BH42" s="6">
        <v>0.302199756732762</v>
      </c>
      <c r="BI42" s="6">
        <v>2.40288634934217</v>
      </c>
      <c r="BJ42" s="6">
        <v>-0.754512308799747</v>
      </c>
      <c r="BK42" s="6">
        <v>163.879749010164</v>
      </c>
      <c r="BL42" s="6">
        <v>166.44262188074</v>
      </c>
      <c r="BM42" s="6">
        <v>136.706795984401</v>
      </c>
      <c r="BN42" s="6">
        <v>145.739127524525</v>
      </c>
      <c r="BO42" s="6">
        <v>130.236108423832</v>
      </c>
      <c r="BP42" s="6">
        <v>131.323680682051</v>
      </c>
      <c r="BQ42" s="6">
        <v>2.29257993412472</v>
      </c>
      <c r="BR42" s="6">
        <v>3.75644522012573</v>
      </c>
      <c r="BS42" s="6">
        <v>3.68003102057213</v>
      </c>
      <c r="BT42" s="6">
        <v>1.20742835378422</v>
      </c>
      <c r="BU42" s="6">
        <v>0.297554873511501</v>
      </c>
      <c r="BV42" s="6">
        <v>1.17857285390386</v>
      </c>
      <c r="BW42" s="6">
        <v>178.923491840108</v>
      </c>
      <c r="BX42" s="6">
        <v>176.810244463672</v>
      </c>
      <c r="BY42" s="6">
        <v>160.369727264878</v>
      </c>
      <c r="BZ42" s="6">
        <v>159.914147159264</v>
      </c>
      <c r="CA42" s="6">
        <v>145.274767450693</v>
      </c>
      <c r="CB42" s="6">
        <v>128.799525389652</v>
      </c>
      <c r="CC42" s="6">
        <v>2.60539846621305</v>
      </c>
      <c r="CD42" s="6">
        <v>3.01840328450237</v>
      </c>
      <c r="CE42" s="6">
        <v>2.41769087971909</v>
      </c>
      <c r="CF42" s="6">
        <v>1.18341697718836</v>
      </c>
      <c r="CG42" s="6">
        <v>0.327044808280562</v>
      </c>
      <c r="CH42" s="6">
        <v>0.380552007533368</v>
      </c>
      <c r="CI42" s="6">
        <v>151.788207750237</v>
      </c>
      <c r="CJ42" s="6">
        <v>159.067578058921</v>
      </c>
      <c r="CK42" s="6">
        <v>131.715320661478</v>
      </c>
      <c r="CL42" s="6">
        <v>138.358161069824</v>
      </c>
      <c r="CM42" s="6">
        <v>128.506486701921</v>
      </c>
      <c r="CN42" s="6">
        <v>18.5328954920533</v>
      </c>
      <c r="CO42" s="6">
        <v>1.69311827946825</v>
      </c>
      <c r="CP42" s="6">
        <v>3.44542236009403</v>
      </c>
      <c r="CQ42" s="6">
        <v>7.76678285715775</v>
      </c>
      <c r="CR42" s="6">
        <v>1.45607944817056</v>
      </c>
      <c r="CS42" s="6">
        <v>0.745769492130364</v>
      </c>
      <c r="CT42" s="6">
        <v>0.941753614123115</v>
      </c>
    </row>
    <row r="43" spans="2:98" ht="15" customHeight="true">
      <c r="B43" s="6">
        <v>85.5</v>
      </c>
      <c r="C43" s="6">
        <v>129.92477193363</v>
      </c>
      <c r="D43" s="6">
        <v>113.228126500045</v>
      </c>
      <c r="E43" s="6">
        <v>73.2903879645545</v>
      </c>
      <c r="F43" s="6">
        <v>53.2641671342538</v>
      </c>
      <c r="G43" s="6">
        <v>64.0087762702012</v>
      </c>
      <c r="H43" s="6">
        <v>77.3179278418722</v>
      </c>
      <c r="I43" s="6">
        <v>71.5428080974204</v>
      </c>
      <c r="J43" s="6">
        <v>28.8017581590971</v>
      </c>
      <c r="K43" s="6">
        <v>54.7005289105247</v>
      </c>
      <c r="L43" s="6">
        <v>0.993798779757412</v>
      </c>
      <c r="M43" s="6">
        <v>0.839915432654607</v>
      </c>
      <c r="N43" s="6">
        <v>1.30673834150775</v>
      </c>
      <c r="O43" s="6">
        <v>106.987240232451</v>
      </c>
      <c r="P43" s="6">
        <v>130.983903100418</v>
      </c>
      <c r="Q43" s="6">
        <v>78.0554511652278</v>
      </c>
      <c r="R43" s="6">
        <v>73.3941486212489</v>
      </c>
      <c r="S43" s="6">
        <v>39.9990355912194</v>
      </c>
      <c r="T43" s="6">
        <v>66.467821486074</v>
      </c>
      <c r="U43" s="6">
        <v>53.7933023892459</v>
      </c>
      <c r="V43" s="6">
        <v>30.5039866438582</v>
      </c>
      <c r="W43" s="6">
        <v>18.3122260463271</v>
      </c>
      <c r="X43" s="6">
        <v>0.752924532021723</v>
      </c>
      <c r="Y43" s="6">
        <v>1.01828017212881</v>
      </c>
      <c r="Z43" s="6">
        <v>0.813070651901967</v>
      </c>
      <c r="AA43" s="6">
        <v>126.47036956174</v>
      </c>
      <c r="AB43" s="6">
        <v>142.804682048169</v>
      </c>
      <c r="AC43" s="6">
        <v>93.5232509683293</v>
      </c>
      <c r="AD43" s="6">
        <v>63.2352342963213</v>
      </c>
      <c r="AE43" s="6">
        <v>63.045828565403</v>
      </c>
      <c r="AF43" s="6">
        <v>112.925592868712</v>
      </c>
      <c r="AG43" s="6">
        <v>70.8341849954514</v>
      </c>
      <c r="AH43" s="6">
        <v>33.9752257691206</v>
      </c>
      <c r="AI43" s="6">
        <v>33.3539888636084</v>
      </c>
      <c r="AJ43" s="6">
        <v>1.04804148291544</v>
      </c>
      <c r="AK43" s="6">
        <v>0.208207049194812</v>
      </c>
      <c r="AL43" s="6">
        <v>0.978148552833261</v>
      </c>
      <c r="AM43" s="6">
        <v>106.555397008135</v>
      </c>
      <c r="AN43" s="6">
        <v>126.775510009438</v>
      </c>
      <c r="AO43" s="6">
        <v>79.1044050998457</v>
      </c>
      <c r="AP43" s="6">
        <v>64.4177715844041</v>
      </c>
      <c r="AQ43" s="6">
        <v>58.4914077161689</v>
      </c>
      <c r="AR43" s="6">
        <v>60.8305466474064</v>
      </c>
      <c r="AS43" s="6">
        <v>82.0969294230712</v>
      </c>
      <c r="AT43" s="6">
        <v>87.2629258694852</v>
      </c>
      <c r="AU43" s="6">
        <v>18.5398405264992</v>
      </c>
      <c r="AV43" s="6">
        <v>0.898308247850196</v>
      </c>
      <c r="AW43" s="6">
        <v>0.969118537026475</v>
      </c>
      <c r="AX43" s="6">
        <v>2.05699720456101</v>
      </c>
      <c r="AY43" s="6">
        <v>141.510727052772</v>
      </c>
      <c r="AZ43" s="6">
        <v>138.681485969137</v>
      </c>
      <c r="BA43" s="6">
        <v>125.014640081729</v>
      </c>
      <c r="BB43" s="6">
        <v>127.388255199203</v>
      </c>
      <c r="BC43" s="6">
        <v>112.001010614098</v>
      </c>
      <c r="BD43" s="6">
        <v>118.237253103125</v>
      </c>
      <c r="BE43" s="6">
        <v>2.71099406268507</v>
      </c>
      <c r="BF43" s="6">
        <v>3.18252382226916</v>
      </c>
      <c r="BG43" s="6">
        <v>2.56760964650522</v>
      </c>
      <c r="BH43" s="6">
        <v>1.04072652633306</v>
      </c>
      <c r="BI43" s="6">
        <v>2.71658430121408</v>
      </c>
      <c r="BJ43" s="6">
        <v>-0.150243412381258</v>
      </c>
      <c r="BK43" s="6">
        <v>128.692095247513</v>
      </c>
      <c r="BL43" s="6">
        <v>130.840272980821</v>
      </c>
      <c r="BM43" s="6">
        <v>104.619049951271</v>
      </c>
      <c r="BN43" s="6">
        <v>111.091432385474</v>
      </c>
      <c r="BO43" s="6">
        <v>97.8692801569488</v>
      </c>
      <c r="BP43" s="6">
        <v>98.056092580224</v>
      </c>
      <c r="BQ43" s="6">
        <v>2.5767433893123</v>
      </c>
      <c r="BR43" s="6">
        <v>3.81479809637295</v>
      </c>
      <c r="BS43" s="6">
        <v>3.48334354490845</v>
      </c>
      <c r="BT43" s="6">
        <v>-0.0125988134735735</v>
      </c>
      <c r="BU43" s="6">
        <v>0.833227944882253</v>
      </c>
      <c r="BV43" s="6">
        <v>1.83812496059494</v>
      </c>
      <c r="BW43" s="6">
        <v>140.162185645398</v>
      </c>
      <c r="BX43" s="6">
        <v>137.630559986592</v>
      </c>
      <c r="BY43" s="6">
        <v>122.742720183781</v>
      </c>
      <c r="BZ43" s="6">
        <v>120.742586023401</v>
      </c>
      <c r="CA43" s="6">
        <v>108.718898502432</v>
      </c>
      <c r="CB43" s="6">
        <v>95.0505837466931</v>
      </c>
      <c r="CC43" s="6">
        <v>3.12642374529912</v>
      </c>
      <c r="CD43" s="6">
        <v>3.14290294147014</v>
      </c>
      <c r="CE43" s="6">
        <v>2.56983216158426</v>
      </c>
      <c r="CF43" s="6">
        <v>1.30439594954896</v>
      </c>
      <c r="CG43" s="6">
        <v>0.941649460543374</v>
      </c>
      <c r="CH43" s="6">
        <v>0.717514105011276</v>
      </c>
      <c r="CI43" s="6">
        <v>119.094268052549</v>
      </c>
      <c r="CJ43" s="6">
        <v>122.883395416722</v>
      </c>
      <c r="CK43" s="6">
        <v>100.518018224762</v>
      </c>
      <c r="CL43" s="6">
        <v>105.214761764771</v>
      </c>
      <c r="CM43" s="6">
        <v>96.5959948679602</v>
      </c>
      <c r="CN43" s="6">
        <v>8.02056342913409</v>
      </c>
      <c r="CO43" s="6">
        <v>1.6605949794095</v>
      </c>
      <c r="CP43" s="6">
        <v>3.3422341276048</v>
      </c>
      <c r="CQ43" s="6">
        <v>4.94450278590637</v>
      </c>
      <c r="CR43" s="6">
        <v>1.34677393738065</v>
      </c>
      <c r="CS43" s="6">
        <v>0.279205093638893</v>
      </c>
      <c r="CT43" s="6">
        <v>0.940334975486962</v>
      </c>
    </row>
    <row r="44" spans="2:98" ht="15" customHeight="true">
      <c r="B44" s="6">
        <v>86</v>
      </c>
      <c r="C44" s="6">
        <v>136.638460396317</v>
      </c>
      <c r="D44" s="6">
        <v>118.98209292129</v>
      </c>
      <c r="E44" s="6">
        <v>73.5524299186986</v>
      </c>
      <c r="F44" s="6">
        <v>52.1877787471864</v>
      </c>
      <c r="G44" s="6">
        <v>62.2943384511614</v>
      </c>
      <c r="H44" s="6">
        <v>76.3177305528989</v>
      </c>
      <c r="I44" s="6">
        <v>67.6428359826799</v>
      </c>
      <c r="J44" s="6">
        <v>17.9151115953806</v>
      </c>
      <c r="K44" s="6">
        <v>46.6867264987568</v>
      </c>
      <c r="L44" s="6">
        <v>0.870341136768502</v>
      </c>
      <c r="M44" s="6">
        <v>0.531742972457209</v>
      </c>
      <c r="N44" s="6">
        <v>1.0232945653911</v>
      </c>
      <c r="O44" s="6">
        <v>114.670875114059</v>
      </c>
      <c r="P44" s="6">
        <v>137.200067790815</v>
      </c>
      <c r="Q44" s="6">
        <v>80.7772647647503</v>
      </c>
      <c r="R44" s="6">
        <v>73.7019414641598</v>
      </c>
      <c r="S44" s="6">
        <v>37.4445671845921</v>
      </c>
      <c r="T44" s="6">
        <v>70.0282959223264</v>
      </c>
      <c r="U44" s="6">
        <v>51.7940704213808</v>
      </c>
      <c r="V44" s="6">
        <v>19.5768314216394</v>
      </c>
      <c r="W44" s="6">
        <v>10.1172743334677</v>
      </c>
      <c r="X44" s="6">
        <v>0.815982339445952</v>
      </c>
      <c r="Y44" s="6">
        <v>0.588603695131894</v>
      </c>
      <c r="Z44" s="6">
        <v>0.849824826919189</v>
      </c>
      <c r="AA44" s="6">
        <v>136.415378884963</v>
      </c>
      <c r="AB44" s="6">
        <v>147.016532026816</v>
      </c>
      <c r="AC44" s="6">
        <v>95.6190103771556</v>
      </c>
      <c r="AD44" s="6">
        <v>66.4792674929344</v>
      </c>
      <c r="AE44" s="6">
        <v>63.2089676547093</v>
      </c>
      <c r="AF44" s="6">
        <v>108.949561053755</v>
      </c>
      <c r="AG44" s="6">
        <v>72.9268348739861</v>
      </c>
      <c r="AH44" s="6">
        <v>23.3934848979254</v>
      </c>
      <c r="AI44" s="6">
        <v>25.1314028905385</v>
      </c>
      <c r="AJ44" s="6">
        <v>0.445226223948737</v>
      </c>
      <c r="AK44" s="6">
        <v>0.484664770449285</v>
      </c>
      <c r="AL44" s="6">
        <v>0.719451895166799</v>
      </c>
      <c r="AM44" s="6">
        <v>115.978656221859</v>
      </c>
      <c r="AN44" s="6">
        <v>133.016156926698</v>
      </c>
      <c r="AO44" s="6">
        <v>83.9013230982972</v>
      </c>
      <c r="AP44" s="6">
        <v>65.7133846976063</v>
      </c>
      <c r="AQ44" s="6">
        <v>58.0751752098271</v>
      </c>
      <c r="AR44" s="6">
        <v>63.5011955118573</v>
      </c>
      <c r="AS44" s="6">
        <v>76.7225276978805</v>
      </c>
      <c r="AT44" s="6">
        <v>91.2081644999498</v>
      </c>
      <c r="AU44" s="6">
        <v>8.22492049366633</v>
      </c>
      <c r="AV44" s="6">
        <v>0.97692099378969</v>
      </c>
      <c r="AW44" s="6">
        <v>0.55654087270716</v>
      </c>
      <c r="AX44" s="6">
        <v>1.34150402606605</v>
      </c>
      <c r="AY44" s="6">
        <v>97.3288466085931</v>
      </c>
      <c r="AZ44" s="6">
        <v>96.1525862281208</v>
      </c>
      <c r="BA44" s="6">
        <v>84.3838127013804</v>
      </c>
      <c r="BB44" s="6">
        <v>86.8872443131875</v>
      </c>
      <c r="BC44" s="6">
        <v>75.0796393606716</v>
      </c>
      <c r="BD44" s="6">
        <v>78.7650551836708</v>
      </c>
      <c r="BE44" s="6">
        <v>2.69230177726189</v>
      </c>
      <c r="BF44" s="6">
        <v>3.59277737153735</v>
      </c>
      <c r="BG44" s="6">
        <v>1.49676157091756</v>
      </c>
      <c r="BH44" s="6">
        <v>1.19993311448172</v>
      </c>
      <c r="BI44" s="6">
        <v>1.82701048848298</v>
      </c>
      <c r="BJ44" s="6">
        <v>0.548387507318751</v>
      </c>
      <c r="BK44" s="6">
        <v>88.5708655327148</v>
      </c>
      <c r="BL44" s="6">
        <v>91.0184731933932</v>
      </c>
      <c r="BM44" s="6">
        <v>70.7852137180583</v>
      </c>
      <c r="BN44" s="6">
        <v>75.2323730758284</v>
      </c>
      <c r="BO44" s="6">
        <v>65.3871952098358</v>
      </c>
      <c r="BP44" s="6">
        <v>65.0211033852743</v>
      </c>
      <c r="BQ44" s="6">
        <v>1.81029248366087</v>
      </c>
      <c r="BR44" s="6">
        <v>3.2489633503755</v>
      </c>
      <c r="BS44" s="6">
        <v>3.01582470105865</v>
      </c>
      <c r="BT44" s="6">
        <v>-0.108107672210338</v>
      </c>
      <c r="BU44" s="6">
        <v>1.12191205808818</v>
      </c>
      <c r="BV44" s="6">
        <v>1.58725359825274</v>
      </c>
      <c r="BW44" s="6">
        <v>96.8749086272309</v>
      </c>
      <c r="BX44" s="6">
        <v>94.667936139071</v>
      </c>
      <c r="BY44" s="6">
        <v>83.2815894700025</v>
      </c>
      <c r="BZ44" s="6">
        <v>80.9936018779328</v>
      </c>
      <c r="CA44" s="6">
        <v>72.2184541870092</v>
      </c>
      <c r="CB44" s="6">
        <v>62.8919777529338</v>
      </c>
      <c r="CC44" s="6">
        <v>2.7273597009231</v>
      </c>
      <c r="CD44" s="6">
        <v>2.9459414857659</v>
      </c>
      <c r="CE44" s="6">
        <v>3.17820190911272</v>
      </c>
      <c r="CF44" s="6">
        <v>1.07617861173969</v>
      </c>
      <c r="CG44" s="6">
        <v>1.34982091794194</v>
      </c>
      <c r="CH44" s="6">
        <v>0.255727384222155</v>
      </c>
      <c r="CI44" s="6">
        <v>81.781320361449</v>
      </c>
      <c r="CJ44" s="6">
        <v>84.1129160338062</v>
      </c>
      <c r="CK44" s="6">
        <v>68.0214893544938</v>
      </c>
      <c r="CL44" s="6">
        <v>71.0631336726343</v>
      </c>
      <c r="CM44" s="6">
        <v>63.7634150014473</v>
      </c>
      <c r="CN44" s="6">
        <v>2.16051781592284</v>
      </c>
      <c r="CO44" s="6">
        <v>1.44151703349502</v>
      </c>
      <c r="CP44" s="6">
        <v>3.24149171721086</v>
      </c>
      <c r="CQ44" s="6">
        <v>3.48512431281819</v>
      </c>
      <c r="CR44" s="6">
        <v>1.44149845798319</v>
      </c>
      <c r="CS44" s="6">
        <v>-0.350643594573626</v>
      </c>
      <c r="CT44" s="6">
        <v>0.916715250875427</v>
      </c>
    </row>
    <row r="45" spans="2:98" ht="15" customHeight="true">
      <c r="B45" s="6">
        <v>86.5</v>
      </c>
      <c r="C45" s="6">
        <v>132.62127223335</v>
      </c>
      <c r="D45" s="6">
        <v>117.619901287579</v>
      </c>
      <c r="E45" s="6">
        <v>71.4420314631111</v>
      </c>
      <c r="F45" s="6">
        <v>52.6083101124704</v>
      </c>
      <c r="G45" s="6">
        <v>61.6828013917154</v>
      </c>
      <c r="H45" s="6">
        <v>75.6780696687302</v>
      </c>
      <c r="I45" s="6">
        <v>64.4743703297107</v>
      </c>
      <c r="J45" s="6">
        <v>15.0772697206862</v>
      </c>
      <c r="K45" s="6">
        <v>40.6207699272909</v>
      </c>
      <c r="L45" s="6">
        <v>0.307041013303774</v>
      </c>
      <c r="M45" s="6">
        <v>0.422715451325018</v>
      </c>
      <c r="N45" s="6">
        <v>0.528663248615374</v>
      </c>
      <c r="O45" s="6">
        <v>116.360904447327</v>
      </c>
      <c r="P45" s="6">
        <v>133.587523740627</v>
      </c>
      <c r="Q45" s="6">
        <v>80.0613536827592</v>
      </c>
      <c r="R45" s="6">
        <v>72.003775070441</v>
      </c>
      <c r="S45" s="6">
        <v>38.0538714500409</v>
      </c>
      <c r="T45" s="6">
        <v>74.7724785200077</v>
      </c>
      <c r="U45" s="6">
        <v>51.0047871694092</v>
      </c>
      <c r="V45" s="6">
        <v>15.6894538972359</v>
      </c>
      <c r="W45" s="6">
        <v>8.32001788424026</v>
      </c>
      <c r="X45" s="6">
        <v>0.767374954274203</v>
      </c>
      <c r="Y45" s="6">
        <v>0.573413196220031</v>
      </c>
      <c r="Z45" s="6">
        <v>0.744558106685531</v>
      </c>
      <c r="AA45" s="6">
        <v>139.420110706123</v>
      </c>
      <c r="AB45" s="6">
        <v>143.240184443781</v>
      </c>
      <c r="AC45" s="6">
        <v>94.5660849298108</v>
      </c>
      <c r="AD45" s="6">
        <v>68.8507964300924</v>
      </c>
      <c r="AE45" s="6">
        <v>64.3731525473475</v>
      </c>
      <c r="AF45" s="6">
        <v>101.807494936638</v>
      </c>
      <c r="AG45" s="6">
        <v>74.0113602712621</v>
      </c>
      <c r="AH45" s="6">
        <v>18.8088194741681</v>
      </c>
      <c r="AI45" s="6">
        <v>22.5343305864608</v>
      </c>
      <c r="AJ45" s="6">
        <v>0.190443292920065</v>
      </c>
      <c r="AK45" s="6">
        <v>0.131280645085951</v>
      </c>
      <c r="AL45" s="6">
        <v>0.614808143511198</v>
      </c>
      <c r="AM45" s="6">
        <v>120.976494053742</v>
      </c>
      <c r="AN45" s="6">
        <v>132.771905613169</v>
      </c>
      <c r="AO45" s="6">
        <v>86.0501168106912</v>
      </c>
      <c r="AP45" s="6">
        <v>66.4478512115847</v>
      </c>
      <c r="AQ45" s="6">
        <v>57.8600619363384</v>
      </c>
      <c r="AR45" s="6">
        <v>66.3790528651948</v>
      </c>
      <c r="AS45" s="6">
        <v>70.2623644749554</v>
      </c>
      <c r="AT45" s="6">
        <v>90.7138064307261</v>
      </c>
      <c r="AU45" s="6">
        <v>5.30718616699386</v>
      </c>
      <c r="AV45" s="6">
        <v>1.09115802817723</v>
      </c>
      <c r="AW45" s="6">
        <v>0.632828475984468</v>
      </c>
      <c r="AX45" s="6">
        <v>0.159359623213675</v>
      </c>
      <c r="AY45" s="6">
        <v>57.5524957216698</v>
      </c>
      <c r="AZ45" s="6">
        <v>57.3985796775816</v>
      </c>
      <c r="BA45" s="6">
        <v>48.3438670475079</v>
      </c>
      <c r="BB45" s="6">
        <v>50.9291281426777</v>
      </c>
      <c r="BC45" s="6">
        <v>42.4616826759178</v>
      </c>
      <c r="BD45" s="6">
        <v>44.754444682028</v>
      </c>
      <c r="BE45" s="6">
        <v>2.19997936936704</v>
      </c>
      <c r="BF45" s="6">
        <v>3.76774570510184</v>
      </c>
      <c r="BG45" s="6">
        <v>1.29315494545045</v>
      </c>
      <c r="BH45" s="6">
        <v>1.27723015780975</v>
      </c>
      <c r="BI45" s="6">
        <v>1.19228727999683</v>
      </c>
      <c r="BJ45" s="6">
        <v>0.985904663478607</v>
      </c>
      <c r="BK45" s="6">
        <v>53.14013672444</v>
      </c>
      <c r="BL45" s="6">
        <v>53.8380308887305</v>
      </c>
      <c r="BM45" s="6">
        <v>41.4663289882096</v>
      </c>
      <c r="BN45" s="6">
        <v>43.1588902121009</v>
      </c>
      <c r="BO45" s="6">
        <v>36.7797798024263</v>
      </c>
      <c r="BP45" s="6">
        <v>36.6207079644053</v>
      </c>
      <c r="BQ45" s="6">
        <v>0.975416590845271</v>
      </c>
      <c r="BR45" s="6">
        <v>1.99991362626287</v>
      </c>
      <c r="BS45" s="6">
        <v>2.38912553044219</v>
      </c>
      <c r="BT45" s="6">
        <v>0.526670282868395</v>
      </c>
      <c r="BU45" s="6">
        <v>1.64444359636724</v>
      </c>
      <c r="BV45" s="6">
        <v>0.430110652363282</v>
      </c>
      <c r="BW45" s="6">
        <v>57.9265807717812</v>
      </c>
      <c r="BX45" s="6">
        <v>55.8595530990621</v>
      </c>
      <c r="BY45" s="6">
        <v>48.4168969641664</v>
      </c>
      <c r="BZ45" s="6">
        <v>46.6614262431881</v>
      </c>
      <c r="CA45" s="6">
        <v>40.1581411004626</v>
      </c>
      <c r="CB45" s="6">
        <v>35.0688598703591</v>
      </c>
      <c r="CC45" s="6">
        <v>1.81524366927033</v>
      </c>
      <c r="CD45" s="6">
        <v>2.95448129408027</v>
      </c>
      <c r="CE45" s="6">
        <v>2.87702644404379</v>
      </c>
      <c r="CF45" s="6">
        <v>0.764686023127467</v>
      </c>
      <c r="CG45" s="6">
        <v>1.39932804892851</v>
      </c>
      <c r="CH45" s="6">
        <v>0.21996546068624</v>
      </c>
      <c r="CI45" s="6">
        <v>48.4610962861291</v>
      </c>
      <c r="CJ45" s="6">
        <v>48.6666045846102</v>
      </c>
      <c r="CK45" s="6">
        <v>38.9384258666017</v>
      </c>
      <c r="CL45" s="6">
        <v>40.7461578748271</v>
      </c>
      <c r="CM45" s="6">
        <v>35.6499899386605</v>
      </c>
      <c r="CN45" s="6">
        <v>1.12957206469963</v>
      </c>
      <c r="CO45" s="6">
        <v>1.29718022306707</v>
      </c>
      <c r="CP45" s="6">
        <v>2.76853729479376</v>
      </c>
      <c r="CQ45" s="6">
        <v>3.93811253572056</v>
      </c>
      <c r="CR45" s="6">
        <v>1.42075574436325</v>
      </c>
      <c r="CS45" s="6">
        <v>-0.567146486294178</v>
      </c>
      <c r="CT45" s="6">
        <v>0.327597401203207</v>
      </c>
    </row>
    <row r="46" spans="2:98" ht="15" customHeight="true">
      <c r="B46" s="6">
        <v>87</v>
      </c>
      <c r="C46" s="6">
        <v>117.29971927724</v>
      </c>
      <c r="D46" s="6">
        <v>107.618004760941</v>
      </c>
      <c r="E46" s="6">
        <v>62.5316863405742</v>
      </c>
      <c r="F46" s="6">
        <v>49.1254785953522</v>
      </c>
      <c r="G46" s="6">
        <v>57.2989436743761</v>
      </c>
      <c r="H46" s="6">
        <v>69.8489850430334</v>
      </c>
      <c r="I46" s="6">
        <v>58.532197027464</v>
      </c>
      <c r="J46" s="6">
        <v>13.5556720315957</v>
      </c>
      <c r="K46" s="6">
        <v>33.1259295781336</v>
      </c>
      <c r="L46" s="6">
        <v>0.331916822471669</v>
      </c>
      <c r="M46" s="6">
        <v>0.357676837227018</v>
      </c>
      <c r="N46" s="6">
        <v>0.976990994174571</v>
      </c>
      <c r="O46" s="6">
        <v>108.012355471273</v>
      </c>
      <c r="P46" s="6">
        <v>117.821037486324</v>
      </c>
      <c r="Q46" s="6">
        <v>70.7680022346699</v>
      </c>
      <c r="R46" s="6">
        <v>64.1243009539624</v>
      </c>
      <c r="S46" s="6">
        <v>35.9122544519329</v>
      </c>
      <c r="T46" s="6">
        <v>72.7336926044591</v>
      </c>
      <c r="U46" s="6">
        <v>47.6253165966368</v>
      </c>
      <c r="V46" s="6">
        <v>13.2801707410389</v>
      </c>
      <c r="W46" s="6">
        <v>7.43392543715953</v>
      </c>
      <c r="X46" s="6">
        <v>0.80748528777616</v>
      </c>
      <c r="Y46" s="6">
        <v>0.560219292345835</v>
      </c>
      <c r="Z46" s="6">
        <v>1.00764969015512</v>
      </c>
      <c r="AA46" s="6">
        <v>131.362723658306</v>
      </c>
      <c r="AB46" s="6">
        <v>128.414023119045</v>
      </c>
      <c r="AC46" s="6">
        <v>83.8921559953478</v>
      </c>
      <c r="AD46" s="6">
        <v>65.4248481024388</v>
      </c>
      <c r="AE46" s="6">
        <v>59.7731934996084</v>
      </c>
      <c r="AF46" s="6">
        <v>89.3733672318394</v>
      </c>
      <c r="AG46" s="6">
        <v>69.3937890341372</v>
      </c>
      <c r="AH46" s="6">
        <v>15.7080666322229</v>
      </c>
      <c r="AI46" s="6">
        <v>19.4320825007422</v>
      </c>
      <c r="AJ46" s="6">
        <v>0.773907592359421</v>
      </c>
      <c r="AK46" s="6">
        <v>-0.0540785704104678</v>
      </c>
      <c r="AL46" s="6">
        <v>0.19732718817005</v>
      </c>
      <c r="AM46" s="6">
        <v>117.066398087586</v>
      </c>
      <c r="AN46" s="6">
        <v>121.488632809116</v>
      </c>
      <c r="AO46" s="6">
        <v>79.9222840437512</v>
      </c>
      <c r="AP46" s="6">
        <v>62.2740673423883</v>
      </c>
      <c r="AQ46" s="6">
        <v>53.1220762952545</v>
      </c>
      <c r="AR46" s="6">
        <v>64.322044182042</v>
      </c>
      <c r="AS46" s="6">
        <v>60.4156053598976</v>
      </c>
      <c r="AT46" s="6">
        <v>82.7837621680737</v>
      </c>
      <c r="AU46" s="6">
        <v>5.01448837600725</v>
      </c>
      <c r="AV46" s="6">
        <v>0.773975691286012</v>
      </c>
      <c r="AW46" s="6">
        <v>0.412302782636061</v>
      </c>
      <c r="AX46" s="6">
        <v>0.0444719164696039</v>
      </c>
      <c r="AY46" s="6">
        <v>25.3984939248607</v>
      </c>
      <c r="AZ46" s="6">
        <v>26.2221164667818</v>
      </c>
      <c r="BA46" s="6">
        <v>19.734027767563</v>
      </c>
      <c r="BB46" s="6">
        <v>22.5145973233546</v>
      </c>
      <c r="BC46" s="6">
        <v>16.6090634571602</v>
      </c>
      <c r="BD46" s="6">
        <v>18.1525833584038</v>
      </c>
      <c r="BE46" s="6">
        <v>1.75002656834607</v>
      </c>
      <c r="BF46" s="6">
        <v>3.26520728322328</v>
      </c>
      <c r="BG46" s="6">
        <v>1.28793761970098</v>
      </c>
      <c r="BH46" s="6">
        <v>1.32913323139394</v>
      </c>
      <c r="BI46" s="6">
        <v>0.953320613919004</v>
      </c>
      <c r="BJ46" s="6">
        <v>1.46230330829229</v>
      </c>
      <c r="BK46" s="6">
        <v>24.3836099765177</v>
      </c>
      <c r="BL46" s="6">
        <v>24.1431555153115</v>
      </c>
      <c r="BM46" s="6">
        <v>18.1707858611771</v>
      </c>
      <c r="BN46" s="6">
        <v>17.4966832701067</v>
      </c>
      <c r="BO46" s="6">
        <v>13.9814462234602</v>
      </c>
      <c r="BP46" s="6">
        <v>14.7213647607786</v>
      </c>
      <c r="BQ46" s="6">
        <v>1.22428207418312</v>
      </c>
      <c r="BR46" s="6">
        <v>1.43994781203929</v>
      </c>
      <c r="BS46" s="6">
        <v>1.50653316632355</v>
      </c>
      <c r="BT46" s="6">
        <v>0.684264989823646</v>
      </c>
      <c r="BU46" s="6">
        <v>2.19974182448385</v>
      </c>
      <c r="BV46" s="6">
        <v>0.244260494183777</v>
      </c>
      <c r="BW46" s="6">
        <v>26.5840641057239</v>
      </c>
      <c r="BX46" s="6">
        <v>25.0312145930264</v>
      </c>
      <c r="BY46" s="6">
        <v>21.014661525841</v>
      </c>
      <c r="BZ46" s="6">
        <v>18.8146805278635</v>
      </c>
      <c r="CA46" s="6">
        <v>15.625044294834</v>
      </c>
      <c r="CB46" s="6">
        <v>13.8402576480219</v>
      </c>
      <c r="CC46" s="6">
        <v>1.90355726751511</v>
      </c>
      <c r="CD46" s="6">
        <v>3.08933068889388</v>
      </c>
      <c r="CE46" s="6">
        <v>2.05604513553737</v>
      </c>
      <c r="CF46" s="6">
        <v>0.767496642780202</v>
      </c>
      <c r="CG46" s="6">
        <v>1.97534082834841</v>
      </c>
      <c r="CH46" s="6">
        <v>0.787022866735185</v>
      </c>
      <c r="CI46" s="6">
        <v>22.2350133430417</v>
      </c>
      <c r="CJ46" s="6">
        <v>20.9109342044997</v>
      </c>
      <c r="CK46" s="6">
        <v>16.0048701552852</v>
      </c>
      <c r="CL46" s="6">
        <v>16.5628132357043</v>
      </c>
      <c r="CM46" s="6">
        <v>14.7665995402979</v>
      </c>
      <c r="CN46" s="6">
        <v>1.08855142964632</v>
      </c>
      <c r="CO46" s="6">
        <v>1.17539466899888</v>
      </c>
      <c r="CP46" s="6">
        <v>2.14159845599556</v>
      </c>
      <c r="CQ46" s="6">
        <v>3.75387557242851</v>
      </c>
      <c r="CR46" s="6">
        <v>1.08125666414077</v>
      </c>
      <c r="CS46" s="6">
        <v>-0.019743012629533</v>
      </c>
      <c r="CT46" s="6">
        <v>0.0124017508618408</v>
      </c>
    </row>
    <row r="47" spans="2:98" ht="15" customHeight="true">
      <c r="B47" s="6">
        <v>87.5</v>
      </c>
      <c r="C47" s="6">
        <v>96.2471744566275</v>
      </c>
      <c r="D47" s="6">
        <v>90.2474988950549</v>
      </c>
      <c r="E47" s="6">
        <v>49.7607841887981</v>
      </c>
      <c r="F47" s="6">
        <v>41.1883965486399</v>
      </c>
      <c r="G47" s="6">
        <v>48.9600295747878</v>
      </c>
      <c r="H47" s="6">
        <v>57.7979825236257</v>
      </c>
      <c r="I47" s="6">
        <v>48.1955300695939</v>
      </c>
      <c r="J47" s="6">
        <v>10.8715397368354</v>
      </c>
      <c r="K47" s="6">
        <v>24.7024708562002</v>
      </c>
      <c r="L47" s="6">
        <v>0.595002063168067</v>
      </c>
      <c r="M47" s="6">
        <v>0.507227179884353</v>
      </c>
      <c r="N47" s="6">
        <v>0.943330077841551</v>
      </c>
      <c r="O47" s="6">
        <v>92.6347863601143</v>
      </c>
      <c r="P47" s="6">
        <v>94.4208530549895</v>
      </c>
      <c r="Q47" s="6">
        <v>55.8017996612772</v>
      </c>
      <c r="R47" s="6">
        <v>51.105708839448</v>
      </c>
      <c r="S47" s="6">
        <v>31.1833895835138</v>
      </c>
      <c r="T47" s="6">
        <v>61.8478293768326</v>
      </c>
      <c r="U47" s="6">
        <v>40.0096106111695</v>
      </c>
      <c r="V47" s="6">
        <v>10.3260576345771</v>
      </c>
      <c r="W47" s="6">
        <v>6.13242921559044</v>
      </c>
      <c r="X47" s="6">
        <v>0.673322663725116</v>
      </c>
      <c r="Y47" s="6">
        <v>0.656425446194817</v>
      </c>
      <c r="Z47" s="6">
        <v>0.600607350605912</v>
      </c>
      <c r="AA47" s="6">
        <v>114.416766352419</v>
      </c>
      <c r="AB47" s="6">
        <v>106.820922837605</v>
      </c>
      <c r="AC47" s="6">
        <v>66.2637528174928</v>
      </c>
      <c r="AD47" s="6">
        <v>56.6500407507833</v>
      </c>
      <c r="AE47" s="6">
        <v>49.8045183302276</v>
      </c>
      <c r="AF47" s="6">
        <v>71.2928012746676</v>
      </c>
      <c r="AG47" s="6">
        <v>58.7641774104402</v>
      </c>
      <c r="AH47" s="6">
        <v>12.8359717787005</v>
      </c>
      <c r="AI47" s="6">
        <v>13.9130781502172</v>
      </c>
      <c r="AJ47" s="6">
        <v>-0.0824662690923788</v>
      </c>
      <c r="AK47" s="6">
        <v>0.537805576101221</v>
      </c>
      <c r="AL47" s="6">
        <v>-0.246266860181436</v>
      </c>
      <c r="AM47" s="6">
        <v>104.889920650074</v>
      </c>
      <c r="AN47" s="6">
        <v>101.923607774765</v>
      </c>
      <c r="AO47" s="6">
        <v>66.7881936632477</v>
      </c>
      <c r="AP47" s="6">
        <v>52.1948755791275</v>
      </c>
      <c r="AQ47" s="6">
        <v>44.0356040284221</v>
      </c>
      <c r="AR47" s="6">
        <v>56.0046965281289</v>
      </c>
      <c r="AS47" s="6">
        <v>46.4109514684195</v>
      </c>
      <c r="AT47" s="6">
        <v>68.7843153369376</v>
      </c>
      <c r="AU47" s="6">
        <v>3.75469227287516</v>
      </c>
      <c r="AV47" s="6">
        <v>0.473343273566456</v>
      </c>
      <c r="AW47" s="6">
        <v>0.0332419304568248</v>
      </c>
      <c r="AX47" s="6">
        <v>0.103602137558426</v>
      </c>
      <c r="AY47" s="6">
        <v>7.03330011926244</v>
      </c>
      <c r="AZ47" s="6">
        <v>8.54470487973544</v>
      </c>
      <c r="BA47" s="6">
        <v>5.55513640501806</v>
      </c>
      <c r="BB47" s="6">
        <v>6.95463492165823</v>
      </c>
      <c r="BC47" s="6">
        <v>3.89060327165794</v>
      </c>
      <c r="BD47" s="6">
        <v>3.92731178415585</v>
      </c>
      <c r="BE47" s="6">
        <v>1.300310264514</v>
      </c>
      <c r="BF47" s="6">
        <v>3.03108444023996</v>
      </c>
      <c r="BG47" s="6">
        <v>0.995157898926322</v>
      </c>
      <c r="BH47" s="6">
        <v>0.639164793513828</v>
      </c>
      <c r="BI47" s="6">
        <v>0.119377050859271</v>
      </c>
      <c r="BJ47" s="6">
        <v>1.72342602468336</v>
      </c>
      <c r="BK47" s="6">
        <v>7.47582862918637</v>
      </c>
      <c r="BL47" s="6">
        <v>7.94198455439022</v>
      </c>
      <c r="BM47" s="6">
        <v>5.61134324984067</v>
      </c>
      <c r="BN47" s="6">
        <v>4.65036744268269</v>
      </c>
      <c r="BO47" s="6">
        <v>2.5782272423117</v>
      </c>
      <c r="BP47" s="6">
        <v>4.02678079260892</v>
      </c>
      <c r="BQ47" s="6">
        <v>1.40713438433852</v>
      </c>
      <c r="BR47" s="6">
        <v>1.26764708089161</v>
      </c>
      <c r="BS47" s="6">
        <v>0.895372684924439</v>
      </c>
      <c r="BT47" s="6">
        <v>0.668724288425096</v>
      </c>
      <c r="BU47" s="6">
        <v>1.72011235321855</v>
      </c>
      <c r="BV47" s="6">
        <v>0.165301408662458</v>
      </c>
      <c r="BW47" s="6">
        <v>8.98082149798444</v>
      </c>
      <c r="BX47" s="6">
        <v>8.45374436327603</v>
      </c>
      <c r="BY47" s="6">
        <v>6.3696058031183</v>
      </c>
      <c r="BZ47" s="6">
        <v>4.63899893732309</v>
      </c>
      <c r="CA47" s="6">
        <v>4.22096627966891</v>
      </c>
      <c r="CB47" s="6">
        <v>4.21681645684208</v>
      </c>
      <c r="CC47" s="6">
        <v>1.54149446206958</v>
      </c>
      <c r="CD47" s="6">
        <v>2.32968930591107</v>
      </c>
      <c r="CE47" s="6">
        <v>2.20407850480711</v>
      </c>
      <c r="CF47" s="6">
        <v>0.988863832444849</v>
      </c>
      <c r="CG47" s="6">
        <v>2.08903002349956</v>
      </c>
      <c r="CH47" s="6">
        <v>0.849440362921996</v>
      </c>
      <c r="CI47" s="6">
        <v>7.31233709907889</v>
      </c>
      <c r="CJ47" s="6">
        <v>6.38526912134023</v>
      </c>
      <c r="CK47" s="6">
        <v>4.80081908467679</v>
      </c>
      <c r="CL47" s="6">
        <v>4.32667143584138</v>
      </c>
      <c r="CM47" s="6">
        <v>3.97194282361221</v>
      </c>
      <c r="CN47" s="6">
        <v>1.17483786693913</v>
      </c>
      <c r="CO47" s="6">
        <v>1.22777430180133</v>
      </c>
      <c r="CP47" s="6">
        <v>1.6314746292644</v>
      </c>
      <c r="CQ47" s="6">
        <v>2.91677249437851</v>
      </c>
      <c r="CR47" s="6">
        <v>0.694576692609928</v>
      </c>
      <c r="CS47" s="6">
        <v>0.105290588848902</v>
      </c>
      <c r="CT47" s="6">
        <v>0.169527498251227</v>
      </c>
    </row>
    <row r="48" spans="2:98" ht="15" customHeight="true">
      <c r="B48" s="6">
        <v>88</v>
      </c>
      <c r="C48" s="6">
        <v>73.1402954584058</v>
      </c>
      <c r="D48" s="6">
        <v>69.516753416254</v>
      </c>
      <c r="E48" s="6">
        <v>37.5007392433009</v>
      </c>
      <c r="F48" s="6">
        <v>33.0536083040145</v>
      </c>
      <c r="G48" s="6">
        <v>38.8977752530924</v>
      </c>
      <c r="H48" s="6">
        <v>44.16547650941</v>
      </c>
      <c r="I48" s="6">
        <v>36.7621473176342</v>
      </c>
      <c r="J48" s="6">
        <v>7.91699463654561</v>
      </c>
      <c r="K48" s="6">
        <v>17.5085345966996</v>
      </c>
      <c r="L48" s="6">
        <v>0.623649595329084</v>
      </c>
      <c r="M48" s="6">
        <v>0.683739460453296</v>
      </c>
      <c r="N48" s="6">
        <v>0.0237066941246553</v>
      </c>
      <c r="O48" s="6">
        <v>74.7606263978388</v>
      </c>
      <c r="P48" s="6">
        <v>70.0334537618373</v>
      </c>
      <c r="Q48" s="6">
        <v>40.895722338462</v>
      </c>
      <c r="R48" s="6">
        <v>37.9935513441704</v>
      </c>
      <c r="S48" s="6">
        <v>25.7316121245033</v>
      </c>
      <c r="T48" s="6">
        <v>47.8872109178509</v>
      </c>
      <c r="U48" s="6">
        <v>30.1481162937861</v>
      </c>
      <c r="V48" s="6">
        <v>7.71435893481737</v>
      </c>
      <c r="W48" s="6">
        <v>5.11724485619988</v>
      </c>
      <c r="X48" s="6">
        <v>0.301896512946257</v>
      </c>
      <c r="Y48" s="6">
        <v>1.16039294555748</v>
      </c>
      <c r="Z48" s="6">
        <v>-0.429730062708927</v>
      </c>
      <c r="AA48" s="6">
        <v>93.737062426739</v>
      </c>
      <c r="AB48" s="6">
        <v>84.6874906756909</v>
      </c>
      <c r="AC48" s="6">
        <v>49.0522657537633</v>
      </c>
      <c r="AD48" s="6">
        <v>45.6703491711373</v>
      </c>
      <c r="AE48" s="6">
        <v>38.4997275646149</v>
      </c>
      <c r="AF48" s="6">
        <v>53.7357076490662</v>
      </c>
      <c r="AG48" s="6">
        <v>44.9837556488615</v>
      </c>
      <c r="AH48" s="6">
        <v>9.89516615195578</v>
      </c>
      <c r="AI48" s="6">
        <v>9.84181368809493</v>
      </c>
      <c r="AJ48" s="6">
        <v>-0.977288169408041</v>
      </c>
      <c r="AK48" s="6">
        <v>0.400796229763898</v>
      </c>
      <c r="AL48" s="6">
        <v>-0.450611628731792</v>
      </c>
      <c r="AM48" s="6">
        <v>88.0970611959772</v>
      </c>
      <c r="AN48" s="6">
        <v>80.3694702745968</v>
      </c>
      <c r="AO48" s="6">
        <v>51.5219941023918</v>
      </c>
      <c r="AP48" s="6">
        <v>40.7665113857849</v>
      </c>
      <c r="AQ48" s="6">
        <v>33.8226485512502</v>
      </c>
      <c r="AR48" s="6">
        <v>44.5265335185667</v>
      </c>
      <c r="AS48" s="6">
        <v>33.0561098280389</v>
      </c>
      <c r="AT48" s="6">
        <v>52.5944452871518</v>
      </c>
      <c r="AU48" s="6">
        <v>2.23955475012832</v>
      </c>
      <c r="AV48" s="6">
        <v>0.584501818105082</v>
      </c>
      <c r="AW48" s="6">
        <v>0.174861278373442</v>
      </c>
      <c r="AX48" s="6">
        <v>-0.397175073426865</v>
      </c>
      <c r="AY48" s="6">
        <v>1.81271686452413</v>
      </c>
      <c r="AZ48" s="6">
        <v>3.15556008351763</v>
      </c>
      <c r="BA48" s="6">
        <v>2.59172339079043</v>
      </c>
      <c r="BB48" s="6">
        <v>2.73849242880942</v>
      </c>
      <c r="BC48" s="6">
        <v>1.90013446315953</v>
      </c>
      <c r="BD48" s="6">
        <v>1.20605308018753</v>
      </c>
      <c r="BE48" s="6">
        <v>1.02463229914855</v>
      </c>
      <c r="BF48" s="6">
        <v>3.0597320559342</v>
      </c>
      <c r="BG48" s="6">
        <v>0.921397349627398</v>
      </c>
      <c r="BH48" s="6">
        <v>-0.0376824828339295</v>
      </c>
      <c r="BI48" s="6">
        <v>-0.196963036818602</v>
      </c>
      <c r="BJ48" s="6">
        <v>1.35724853048788</v>
      </c>
      <c r="BK48" s="6">
        <v>2.94666597465806</v>
      </c>
      <c r="BL48" s="6">
        <v>3.38293704425695</v>
      </c>
      <c r="BM48" s="6">
        <v>2.78553912706502</v>
      </c>
      <c r="BN48" s="6">
        <v>1.92564943083391</v>
      </c>
      <c r="BO48" s="6">
        <v>0.850336829915079</v>
      </c>
      <c r="BP48" s="6">
        <v>1.73034791744783</v>
      </c>
      <c r="BQ48" s="6">
        <v>1.04402145887121</v>
      </c>
      <c r="BR48" s="6">
        <v>0.633128860784098</v>
      </c>
      <c r="BS48" s="6">
        <v>1.10046473307455</v>
      </c>
      <c r="BT48" s="6">
        <v>1.26476185486894</v>
      </c>
      <c r="BU48" s="6">
        <v>0.93728763779535</v>
      </c>
      <c r="BV48" s="6">
        <v>-0.241026240060421</v>
      </c>
      <c r="BW48" s="6">
        <v>3.81364691256397</v>
      </c>
      <c r="BX48" s="6">
        <v>3.85394187626792</v>
      </c>
      <c r="BY48" s="6">
        <v>2.96700691487268</v>
      </c>
      <c r="BZ48" s="6">
        <v>2.84482348475524</v>
      </c>
      <c r="CA48" s="6">
        <v>1.85812004596494</v>
      </c>
      <c r="CB48" s="6">
        <v>2.92451612975452</v>
      </c>
      <c r="CC48" s="6">
        <v>0.610894629293227</v>
      </c>
      <c r="CD48" s="6">
        <v>1.18569132855356</v>
      </c>
      <c r="CE48" s="6">
        <v>2.57916812817069</v>
      </c>
      <c r="CF48" s="6">
        <v>0.884866975642581</v>
      </c>
      <c r="CG48" s="6">
        <v>1.16225776343884</v>
      </c>
      <c r="CH48" s="6">
        <v>0.398823905574091</v>
      </c>
      <c r="CI48" s="6">
        <v>3.1309497389629</v>
      </c>
      <c r="CJ48" s="6">
        <v>2.15820950833</v>
      </c>
      <c r="CK48" s="6">
        <v>2.49011130980801</v>
      </c>
      <c r="CL48" s="6">
        <v>1.70003612307465</v>
      </c>
      <c r="CM48" s="6">
        <v>1.262576355269</v>
      </c>
      <c r="CN48" s="6">
        <v>1.3611929657348</v>
      </c>
      <c r="CO48" s="6">
        <v>1.10295109680231</v>
      </c>
      <c r="CP48" s="6">
        <v>0.867290466846441</v>
      </c>
      <c r="CQ48" s="6">
        <v>2.71019160894542</v>
      </c>
      <c r="CR48" s="6">
        <v>0.580780531292874</v>
      </c>
      <c r="CS48" s="6">
        <v>0.219554030418465</v>
      </c>
      <c r="CT48" s="6">
        <v>0.362978236382332</v>
      </c>
    </row>
    <row r="49" spans="2:98" ht="15" customHeight="true">
      <c r="B49" s="6">
        <v>88.5</v>
      </c>
      <c r="C49" s="6">
        <v>48.6396352948701</v>
      </c>
      <c r="D49" s="6">
        <v>48.1784999196288</v>
      </c>
      <c r="E49" s="6">
        <v>25.2566887793727</v>
      </c>
      <c r="F49" s="6">
        <v>24.7343966011502</v>
      </c>
      <c r="G49" s="6">
        <v>28.4720023085286</v>
      </c>
      <c r="H49" s="6">
        <v>31.4967277046483</v>
      </c>
      <c r="I49" s="6">
        <v>27.1724455690751</v>
      </c>
      <c r="J49" s="6">
        <v>5.41782453361287</v>
      </c>
      <c r="K49" s="6">
        <v>11.9047398238889</v>
      </c>
      <c r="L49" s="6">
        <v>1.18376165717683</v>
      </c>
      <c r="M49" s="6">
        <v>0.745846927874709</v>
      </c>
      <c r="N49" s="6">
        <v>-0.438679621518986</v>
      </c>
      <c r="O49" s="6">
        <v>53.5025529852094</v>
      </c>
      <c r="P49" s="6">
        <v>46.3994497948691</v>
      </c>
      <c r="Q49" s="6">
        <v>26.5531949733577</v>
      </c>
      <c r="R49" s="6">
        <v>26.0848570620497</v>
      </c>
      <c r="S49" s="6">
        <v>18.5559428690112</v>
      </c>
      <c r="T49" s="6">
        <v>33.800676882663</v>
      </c>
      <c r="U49" s="6">
        <v>20.9122847173209</v>
      </c>
      <c r="V49" s="6">
        <v>5.97435870393696</v>
      </c>
      <c r="W49" s="6">
        <v>3.61457434102942</v>
      </c>
      <c r="X49" s="6">
        <v>0.281855315570624</v>
      </c>
      <c r="Y49" s="6">
        <v>1.68971437195864</v>
      </c>
      <c r="Z49" s="6">
        <v>-0.776485492908705</v>
      </c>
      <c r="AA49" s="6">
        <v>68.7700776728303</v>
      </c>
      <c r="AB49" s="6">
        <v>60.8213563985854</v>
      </c>
      <c r="AC49" s="6">
        <v>32.5947842697477</v>
      </c>
      <c r="AD49" s="6">
        <v>33.2269378022988</v>
      </c>
      <c r="AE49" s="6">
        <v>27.1677774398869</v>
      </c>
      <c r="AF49" s="6">
        <v>38.2783357193943</v>
      </c>
      <c r="AG49" s="6">
        <v>31.0103061125653</v>
      </c>
      <c r="AH49" s="6">
        <v>7.47201331149506</v>
      </c>
      <c r="AI49" s="6">
        <v>7.89490729133553</v>
      </c>
      <c r="AJ49" s="6">
        <v>-0.0257067071676715</v>
      </c>
      <c r="AK49" s="6">
        <v>0.0299600869021788</v>
      </c>
      <c r="AL49" s="6">
        <v>-0.487857498243443</v>
      </c>
      <c r="AM49" s="6">
        <v>66.4115549881129</v>
      </c>
      <c r="AN49" s="6">
        <v>57.0773634153362</v>
      </c>
      <c r="AO49" s="6">
        <v>35.6049328992502</v>
      </c>
      <c r="AP49" s="6">
        <v>29.1845826761997</v>
      </c>
      <c r="AQ49" s="6">
        <v>23.393036554406</v>
      </c>
      <c r="AR49" s="6">
        <v>32.0221890799366</v>
      </c>
      <c r="AS49" s="6">
        <v>23.055380512295</v>
      </c>
      <c r="AT49" s="6">
        <v>36.8238282379422</v>
      </c>
      <c r="AU49" s="6">
        <v>2.17753406128537</v>
      </c>
      <c r="AV49" s="6">
        <v>1.18929027748339</v>
      </c>
      <c r="AW49" s="6">
        <v>0.496878390102552</v>
      </c>
      <c r="AX49" s="6">
        <v>-0.100446808395304</v>
      </c>
      <c r="AY49" s="6">
        <v>1.03773808120388</v>
      </c>
      <c r="AZ49" s="6">
        <v>2.25978929387821</v>
      </c>
      <c r="BA49" s="6">
        <v>1.83435680874112</v>
      </c>
      <c r="BB49" s="6">
        <v>1.98314766032672</v>
      </c>
      <c r="BC49" s="6">
        <v>1.63327686513281</v>
      </c>
      <c r="BD49" s="6">
        <v>2.14341380525036</v>
      </c>
      <c r="BE49" s="6">
        <v>0.841334122446199</v>
      </c>
      <c r="BF49" s="6">
        <v>2.51971474059758</v>
      </c>
      <c r="BG49" s="6">
        <v>1.2852195957185</v>
      </c>
      <c r="BH49" s="6">
        <v>0.0243251066603989</v>
      </c>
      <c r="BI49" s="6">
        <v>0.438743848120566</v>
      </c>
      <c r="BJ49" s="6">
        <v>0.712380709066508</v>
      </c>
      <c r="BK49" s="6">
        <v>2.15608900099971</v>
      </c>
      <c r="BL49" s="6">
        <v>2.77394302082763</v>
      </c>
      <c r="BM49" s="6">
        <v>2.46040114603875</v>
      </c>
      <c r="BN49" s="6">
        <v>1.27028543099561</v>
      </c>
      <c r="BO49" s="6">
        <v>0.813273510300235</v>
      </c>
      <c r="BP49" s="6">
        <v>1.02595023662099</v>
      </c>
      <c r="BQ49" s="6">
        <v>1.06308873537091</v>
      </c>
      <c r="BR49" s="6">
        <v>1.05062248703445</v>
      </c>
      <c r="BS49" s="6">
        <v>1.38806639923371</v>
      </c>
      <c r="BT49" s="6">
        <v>1.06391654828099</v>
      </c>
      <c r="BU49" s="6">
        <v>0.389181385777761</v>
      </c>
      <c r="BV49" s="6">
        <v>0.421036343485753</v>
      </c>
      <c r="BW49" s="6">
        <v>2.55366819030803</v>
      </c>
      <c r="BX49" s="6">
        <v>2.67592592391992</v>
      </c>
      <c r="BY49" s="6">
        <v>2.7922921822605</v>
      </c>
      <c r="BZ49" s="6">
        <v>3.05666673441937</v>
      </c>
      <c r="CA49" s="6">
        <v>1.08154022561592</v>
      </c>
      <c r="CB49" s="6">
        <v>2.84202630815804</v>
      </c>
      <c r="CC49" s="6">
        <v>0.810946059524042</v>
      </c>
      <c r="CD49" s="6">
        <v>0.469320996621832</v>
      </c>
      <c r="CE49" s="6">
        <v>2.27642245769414</v>
      </c>
      <c r="CF49" s="6">
        <v>0.693136328610422</v>
      </c>
      <c r="CG49" s="6">
        <v>0.603127546407848</v>
      </c>
      <c r="CH49" s="6">
        <v>0.551503244906542</v>
      </c>
      <c r="CI49" s="6">
        <v>2.66097916202506</v>
      </c>
      <c r="CJ49" s="6">
        <v>1.4149442966683</v>
      </c>
      <c r="CK49" s="6">
        <v>1.97623355066338</v>
      </c>
      <c r="CL49" s="6">
        <v>1.1643229854518</v>
      </c>
      <c r="CM49" s="6">
        <v>1.32952976434774</v>
      </c>
      <c r="CN49" s="6">
        <v>1.36149871958713</v>
      </c>
      <c r="CO49" s="6">
        <v>1.23927452310016</v>
      </c>
      <c r="CP49" s="6">
        <v>0.394536194421789</v>
      </c>
      <c r="CQ49" s="6">
        <v>2.17023621349119</v>
      </c>
      <c r="CR49" s="6">
        <v>0.264746704183665</v>
      </c>
      <c r="CS49" s="6">
        <v>1.10040029202366</v>
      </c>
      <c r="CT49" s="6">
        <v>0.171478773247827</v>
      </c>
    </row>
    <row r="50" spans="2:98" ht="15" customHeight="true">
      <c r="B50" s="6">
        <v>89</v>
      </c>
      <c r="C50" s="6">
        <v>28.4781119453766</v>
      </c>
      <c r="D50" s="6">
        <v>28.8200882625943</v>
      </c>
      <c r="E50" s="6">
        <v>14.7304412383767</v>
      </c>
      <c r="F50" s="6">
        <v>15.982027664894</v>
      </c>
      <c r="G50" s="6">
        <v>18.3527775047812</v>
      </c>
      <c r="H50" s="6">
        <v>20.0482674347468</v>
      </c>
      <c r="I50" s="6">
        <v>17.8181716752965</v>
      </c>
      <c r="J50" s="6">
        <v>2.75387462794942</v>
      </c>
      <c r="K50" s="6">
        <v>7.81592568786976</v>
      </c>
      <c r="L50" s="6">
        <v>2.01130511186835</v>
      </c>
      <c r="M50" s="6">
        <v>1.13504590385708</v>
      </c>
      <c r="N50" s="6">
        <v>-0.461238514730496</v>
      </c>
      <c r="O50" s="6">
        <v>32.7237446332952</v>
      </c>
      <c r="P50" s="6">
        <v>26.1001176083429</v>
      </c>
      <c r="Q50" s="6">
        <v>14.6309209424866</v>
      </c>
      <c r="R50" s="6">
        <v>15.697229559269</v>
      </c>
      <c r="S50" s="6">
        <v>11.4684638591688</v>
      </c>
      <c r="T50" s="6">
        <v>19.8107241309671</v>
      </c>
      <c r="U50" s="6">
        <v>13.5319376378709</v>
      </c>
      <c r="V50" s="6">
        <v>4.32559302133507</v>
      </c>
      <c r="W50" s="6">
        <v>1.75048880833089</v>
      </c>
      <c r="X50" s="6">
        <v>0.522094448728808</v>
      </c>
      <c r="Y50" s="6">
        <v>1.67167761352118</v>
      </c>
      <c r="Z50" s="6">
        <v>-0.401386869576299</v>
      </c>
      <c r="AA50" s="6">
        <v>43.3565806721216</v>
      </c>
      <c r="AB50" s="6">
        <v>38.1547811100673</v>
      </c>
      <c r="AC50" s="6">
        <v>17.7015610420626</v>
      </c>
      <c r="AD50" s="6">
        <v>21.264381293916</v>
      </c>
      <c r="AE50" s="6">
        <v>16.8065866259057</v>
      </c>
      <c r="AF50" s="6">
        <v>23.6823655613884</v>
      </c>
      <c r="AG50" s="6">
        <v>19.1325687773924</v>
      </c>
      <c r="AH50" s="6">
        <v>5.99319290927741</v>
      </c>
      <c r="AI50" s="6">
        <v>5.12090430874758</v>
      </c>
      <c r="AJ50" s="6">
        <v>0.639243325287737</v>
      </c>
      <c r="AK50" s="6">
        <v>0.419813494774701</v>
      </c>
      <c r="AL50" s="6">
        <v>0.0853005286766688</v>
      </c>
      <c r="AM50" s="6">
        <v>43.2999325185211</v>
      </c>
      <c r="AN50" s="6">
        <v>34.9133500072643</v>
      </c>
      <c r="AO50" s="6">
        <v>21.1088067082602</v>
      </c>
      <c r="AP50" s="6">
        <v>17.9066047237032</v>
      </c>
      <c r="AQ50" s="6">
        <v>13.9791862365545</v>
      </c>
      <c r="AR50" s="6">
        <v>19.7232479183782</v>
      </c>
      <c r="AS50" s="6">
        <v>14.3478128893561</v>
      </c>
      <c r="AT50" s="6">
        <v>23.0797555913664</v>
      </c>
      <c r="AU50" s="6">
        <v>1.74777041018643</v>
      </c>
      <c r="AV50" s="6">
        <v>1.55885545340436</v>
      </c>
      <c r="AW50" s="6">
        <v>0.489391744850764</v>
      </c>
      <c r="AX50" s="6">
        <v>0.617613617597613</v>
      </c>
      <c r="AY50" s="6">
        <v>0.79372163741408</v>
      </c>
      <c r="AZ50" s="6">
        <v>1.78866601743101</v>
      </c>
      <c r="BA50" s="6">
        <v>1.95133406657203</v>
      </c>
      <c r="BB50" s="6">
        <v>1.48490865772675</v>
      </c>
      <c r="BC50" s="6">
        <v>2.34588099720725</v>
      </c>
      <c r="BD50" s="6">
        <v>2.33349963368687</v>
      </c>
      <c r="BE50" s="6">
        <v>0.976756571680539</v>
      </c>
      <c r="BF50" s="6">
        <v>2.03161809676078</v>
      </c>
      <c r="BG50" s="6">
        <v>1.33846594771069</v>
      </c>
      <c r="BH50" s="6">
        <v>0.0020482795797534</v>
      </c>
      <c r="BI50" s="6">
        <v>0.628894157658522</v>
      </c>
      <c r="BJ50" s="6">
        <v>0.719529481466395</v>
      </c>
      <c r="BK50" s="6">
        <v>1.75054724685373</v>
      </c>
      <c r="BL50" s="6">
        <v>2.84015781618058</v>
      </c>
      <c r="BM50" s="6">
        <v>2.08947096582835</v>
      </c>
      <c r="BN50" s="6">
        <v>1.17483181690233</v>
      </c>
      <c r="BO50" s="6">
        <v>1.15459684077206</v>
      </c>
      <c r="BP50" s="6">
        <v>0.60052462665027</v>
      </c>
      <c r="BQ50" s="6">
        <v>1.43231795695453</v>
      </c>
      <c r="BR50" s="6">
        <v>2.11284840953738</v>
      </c>
      <c r="BS50" s="6">
        <v>1.79501648436752</v>
      </c>
      <c r="BT50" s="6">
        <v>0.508829850597635</v>
      </c>
      <c r="BU50" s="6">
        <v>-0.548776785363032</v>
      </c>
      <c r="BV50" s="6">
        <v>1.45963813134597</v>
      </c>
      <c r="BW50" s="6">
        <v>2.12305911216896</v>
      </c>
      <c r="BX50" s="6">
        <v>2.5601814801413</v>
      </c>
      <c r="BY50" s="6">
        <v>2.32562642248143</v>
      </c>
      <c r="BZ50" s="6">
        <v>2.63603998615992</v>
      </c>
      <c r="CA50" s="6">
        <v>0.618749718759602</v>
      </c>
      <c r="CB50" s="6">
        <v>2.81636895201672</v>
      </c>
      <c r="CC50" s="6">
        <v>1.14414151606667</v>
      </c>
      <c r="CD50" s="6">
        <v>-0.171783226870389</v>
      </c>
      <c r="CE50" s="6">
        <v>2.34524799842006</v>
      </c>
      <c r="CF50" s="6">
        <v>0.303666040418591</v>
      </c>
      <c r="CG50" s="6">
        <v>0.347015556539361</v>
      </c>
      <c r="CH50" s="6">
        <v>0.605356062399551</v>
      </c>
      <c r="CI50" s="6">
        <v>2.56906852483763</v>
      </c>
      <c r="CJ50" s="6">
        <v>1.73228095385764</v>
      </c>
      <c r="CK50" s="6">
        <v>2.24844912607313</v>
      </c>
      <c r="CL50" s="6">
        <v>1.23382541995761</v>
      </c>
      <c r="CM50" s="6">
        <v>1.50355377712947</v>
      </c>
      <c r="CN50" s="6">
        <v>1.22622913541016</v>
      </c>
      <c r="CO50" s="6">
        <v>1.08700944686183</v>
      </c>
      <c r="CP50" s="6">
        <v>0.613651955261616</v>
      </c>
      <c r="CQ50" s="6">
        <v>1.19519266500862</v>
      </c>
      <c r="CR50" s="6">
        <v>0.0617165390640935</v>
      </c>
      <c r="CS50" s="6">
        <v>1.58491200474305</v>
      </c>
      <c r="CT50" s="6">
        <v>0.388498332494805</v>
      </c>
    </row>
    <row r="51" spans="2:98" ht="15" customHeight="true">
      <c r="B51" s="6">
        <v>89.5</v>
      </c>
      <c r="C51" s="6">
        <v>16.1128602282454</v>
      </c>
      <c r="D51" s="6">
        <v>15.2256784831675</v>
      </c>
      <c r="E51" s="6">
        <v>8.41986882090396</v>
      </c>
      <c r="F51" s="6">
        <v>10.0873055735684</v>
      </c>
      <c r="G51" s="6">
        <v>10.9422627989946</v>
      </c>
      <c r="H51" s="6">
        <v>11.4770652628032</v>
      </c>
      <c r="I51" s="6">
        <v>9.95422442887008</v>
      </c>
      <c r="J51" s="6">
        <v>1.62256677725674</v>
      </c>
      <c r="K51" s="6">
        <v>5.13321867393142</v>
      </c>
      <c r="L51" s="6">
        <v>2.17226200572696</v>
      </c>
      <c r="M51" s="6">
        <v>1.75761260488787</v>
      </c>
      <c r="N51" s="6">
        <v>-0.474948715495941</v>
      </c>
      <c r="O51" s="6">
        <v>18.7168273747263</v>
      </c>
      <c r="P51" s="6">
        <v>13.575306401048</v>
      </c>
      <c r="Q51" s="6">
        <v>7.93996249152758</v>
      </c>
      <c r="R51" s="6">
        <v>8.69138797238969</v>
      </c>
      <c r="S51" s="6">
        <v>7.35959023996458</v>
      </c>
      <c r="T51" s="6">
        <v>10.0235906735788</v>
      </c>
      <c r="U51" s="6">
        <v>7.97217099153579</v>
      </c>
      <c r="V51" s="6">
        <v>2.77988030295506</v>
      </c>
      <c r="W51" s="6">
        <v>1.51500463942915</v>
      </c>
      <c r="X51" s="6">
        <v>0.900759465591591</v>
      </c>
      <c r="Y51" s="6">
        <v>1.50146343688004</v>
      </c>
      <c r="Z51" s="6">
        <v>-0.625265872076852</v>
      </c>
      <c r="AA51" s="6">
        <v>24.8703670085983</v>
      </c>
      <c r="AB51" s="6">
        <v>22.813599224963</v>
      </c>
      <c r="AC51" s="6">
        <v>9.07192592456687</v>
      </c>
      <c r="AD51" s="6">
        <v>12.8033001663699</v>
      </c>
      <c r="AE51" s="6">
        <v>9.81639648871612</v>
      </c>
      <c r="AF51" s="6">
        <v>13.4917717930572</v>
      </c>
      <c r="AG51" s="6">
        <v>10.345426774596</v>
      </c>
      <c r="AH51" s="6">
        <v>4.52714413822008</v>
      </c>
      <c r="AI51" s="6">
        <v>3.53847563383653</v>
      </c>
      <c r="AJ51" s="6">
        <v>0.238584711219517</v>
      </c>
      <c r="AK51" s="6">
        <v>0.73659075313634</v>
      </c>
      <c r="AL51" s="6">
        <v>0.926338708678884</v>
      </c>
      <c r="AM51" s="6">
        <v>25.4274940402307</v>
      </c>
      <c r="AN51" s="6">
        <v>19.9259960881046</v>
      </c>
      <c r="AO51" s="6">
        <v>11.4758586946404</v>
      </c>
      <c r="AP51" s="6">
        <v>10.1215701185322</v>
      </c>
      <c r="AQ51" s="6">
        <v>7.82790075780633</v>
      </c>
      <c r="AR51" s="6">
        <v>10.5819066119246</v>
      </c>
      <c r="AS51" s="6">
        <v>7.8331855139615</v>
      </c>
      <c r="AT51" s="6">
        <v>13.2873295101654</v>
      </c>
      <c r="AU51" s="6">
        <v>1.37785609139593</v>
      </c>
      <c r="AV51" s="6">
        <v>1.46396524889536</v>
      </c>
      <c r="AW51" s="6">
        <v>0.667311440734409</v>
      </c>
      <c r="AX51" s="6">
        <v>0.699227825508217</v>
      </c>
      <c r="AY51" s="6">
        <v>0.987988963234443</v>
      </c>
      <c r="AZ51" s="6">
        <v>1.84535550344748</v>
      </c>
      <c r="BA51" s="6">
        <v>2.3415091284171</v>
      </c>
      <c r="BB51" s="6">
        <v>0.834571182576894</v>
      </c>
      <c r="BC51" s="6">
        <v>3.07787354261342</v>
      </c>
      <c r="BD51" s="6">
        <v>1.65957544572194</v>
      </c>
      <c r="BE51" s="6">
        <v>1.29954771849469</v>
      </c>
      <c r="BF51" s="6">
        <v>1.7978276891472</v>
      </c>
      <c r="BG51" s="6">
        <v>1.55378344007062</v>
      </c>
      <c r="BH51" s="6">
        <v>0.193054755282674</v>
      </c>
      <c r="BI51" s="6">
        <v>0.549393610739514</v>
      </c>
      <c r="BJ51" s="6">
        <v>1.0433961192104</v>
      </c>
      <c r="BK51" s="6">
        <v>2.07508454237245</v>
      </c>
      <c r="BL51" s="6">
        <v>2.47609482204183</v>
      </c>
      <c r="BM51" s="6">
        <v>2.30689636218932</v>
      </c>
      <c r="BN51" s="6">
        <v>1.56772396249164</v>
      </c>
      <c r="BO51" s="6">
        <v>1.87010178222272</v>
      </c>
      <c r="BP51" s="6">
        <v>0.828905350319474</v>
      </c>
      <c r="BQ51" s="6">
        <v>1.36242338593945</v>
      </c>
      <c r="BR51" s="6">
        <v>2.06573545109228</v>
      </c>
      <c r="BS51" s="6">
        <v>2.57400246262989</v>
      </c>
      <c r="BT51" s="6">
        <v>0.635113467628003</v>
      </c>
      <c r="BU51" s="6">
        <v>-0.801803148684598</v>
      </c>
      <c r="BV51" s="6">
        <v>1.21865376012693</v>
      </c>
      <c r="BW51" s="6">
        <v>1.69050317900638</v>
      </c>
      <c r="BX51" s="6">
        <v>2.74713499734418</v>
      </c>
      <c r="BY51" s="6">
        <v>1.67815346237029</v>
      </c>
      <c r="BZ51" s="6">
        <v>3.02999811008374</v>
      </c>
      <c r="CA51" s="6">
        <v>0.3824575828001</v>
      </c>
      <c r="CB51" s="6">
        <v>3.5658553290707</v>
      </c>
      <c r="CC51" s="6">
        <v>0.711420469413099</v>
      </c>
      <c r="CD51" s="6">
        <v>-0.597673084959695</v>
      </c>
      <c r="CE51" s="6">
        <v>2.79231125515201</v>
      </c>
      <c r="CF51" s="6">
        <v>0.31391008899817</v>
      </c>
      <c r="CG51" s="6">
        <v>-0.11614727882943</v>
      </c>
      <c r="CH51" s="6">
        <v>0.352924004330362</v>
      </c>
      <c r="CI51" s="6">
        <v>2.24685295854312</v>
      </c>
      <c r="CJ51" s="6">
        <v>1.9602689731413</v>
      </c>
      <c r="CK51" s="6">
        <v>2.8083177616885</v>
      </c>
      <c r="CL51" s="6">
        <v>1.46615364388873</v>
      </c>
      <c r="CM51" s="6">
        <v>1.13227035066421</v>
      </c>
      <c r="CN51" s="6">
        <v>1.35525829143711</v>
      </c>
      <c r="CO51" s="6">
        <v>0.635569490686635</v>
      </c>
      <c r="CP51" s="6">
        <v>0.679089096748555</v>
      </c>
      <c r="CQ51" s="6">
        <v>1.26743855518754</v>
      </c>
      <c r="CR51" s="6">
        <v>0.249784538678568</v>
      </c>
      <c r="CS51" s="6">
        <v>1.58605773985357</v>
      </c>
      <c r="CT51" s="6">
        <v>0.650340800652373</v>
      </c>
    </row>
    <row r="52" spans="2:98" ht="15" customHeight="true">
      <c r="B52" s="6">
        <v>90</v>
      </c>
      <c r="C52" s="6">
        <v>7.84180036194084</v>
      </c>
      <c r="D52" s="6">
        <v>7.07199504961625</v>
      </c>
      <c r="E52" s="6">
        <v>4.95022061011997</v>
      </c>
      <c r="F52" s="6">
        <v>6.60724437465552</v>
      </c>
      <c r="G52" s="6">
        <v>6.15562051204728</v>
      </c>
      <c r="H52" s="6">
        <v>6.64242685462165</v>
      </c>
      <c r="I52" s="6">
        <v>5.64198950132942</v>
      </c>
      <c r="J52" s="6">
        <v>1.97928893342248</v>
      </c>
      <c r="K52" s="6">
        <v>3.47417360182465</v>
      </c>
      <c r="L52" s="6">
        <v>1.86283435283099</v>
      </c>
      <c r="M52" s="6">
        <v>1.61674591365789</v>
      </c>
      <c r="N52" s="6">
        <v>0.298217005449032</v>
      </c>
      <c r="O52" s="6">
        <v>9.91244790106839</v>
      </c>
      <c r="P52" s="6">
        <v>6.64931519250928</v>
      </c>
      <c r="Q52" s="6">
        <v>4.97338783896157</v>
      </c>
      <c r="R52" s="6">
        <v>5.44616478033748</v>
      </c>
      <c r="S52" s="6">
        <v>4.95691477368462</v>
      </c>
      <c r="T52" s="6">
        <v>5.43091922065611</v>
      </c>
      <c r="U52" s="6">
        <v>4.47283544013089</v>
      </c>
      <c r="V52" s="6">
        <v>2.03107407583042</v>
      </c>
      <c r="W52" s="6">
        <v>1.93869932876657</v>
      </c>
      <c r="X52" s="6">
        <v>1.33149870092222</v>
      </c>
      <c r="Y52" s="6">
        <v>1.50667142417882</v>
      </c>
      <c r="Z52" s="6">
        <v>-0.727431948884146</v>
      </c>
      <c r="AA52" s="6">
        <v>12.5471838962536</v>
      </c>
      <c r="AB52" s="6">
        <v>12.5787178615852</v>
      </c>
      <c r="AC52" s="6">
        <v>5.51427468112058</v>
      </c>
      <c r="AD52" s="6">
        <v>7.72793381569755</v>
      </c>
      <c r="AE52" s="6">
        <v>5.79055889932317</v>
      </c>
      <c r="AF52" s="6">
        <v>7.89081956757207</v>
      </c>
      <c r="AG52" s="6">
        <v>5.19514529516812</v>
      </c>
      <c r="AH52" s="6">
        <v>3.13105906061594</v>
      </c>
      <c r="AI52" s="6">
        <v>4.04080585089201</v>
      </c>
      <c r="AJ52" s="6">
        <v>0.850157798550242</v>
      </c>
      <c r="AK52" s="6">
        <v>0.856264614726626</v>
      </c>
      <c r="AL52" s="6">
        <v>1.17767026242069</v>
      </c>
      <c r="AM52" s="6">
        <v>13.2507683729181</v>
      </c>
      <c r="AN52" s="6">
        <v>10.897344261857</v>
      </c>
      <c r="AO52" s="6">
        <v>6.32389406671228</v>
      </c>
      <c r="AP52" s="6">
        <v>6.49627674740122</v>
      </c>
      <c r="AQ52" s="6">
        <v>4.51691868897285</v>
      </c>
      <c r="AR52" s="6">
        <v>5.89135186839201</v>
      </c>
      <c r="AS52" s="6">
        <v>4.8250493057148</v>
      </c>
      <c r="AT52" s="6">
        <v>7.91285410189153</v>
      </c>
      <c r="AU52" s="6">
        <v>2.11836794941871</v>
      </c>
      <c r="AV52" s="6">
        <v>1.85515931588827</v>
      </c>
      <c r="AW52" s="6">
        <v>1.17246390571057</v>
      </c>
      <c r="AX52" s="6">
        <v>0.630523805202927</v>
      </c>
      <c r="AY52" s="6">
        <v>1.12473615421089</v>
      </c>
      <c r="AZ52" s="6">
        <v>2.65707249707992</v>
      </c>
      <c r="BA52" s="6">
        <v>2.44160767626397</v>
      </c>
      <c r="BB52" s="6">
        <v>0.448128229066981</v>
      </c>
      <c r="BC52" s="6">
        <v>2.71644002481474</v>
      </c>
      <c r="BD52" s="6">
        <v>1.87225089751291</v>
      </c>
      <c r="BE52" s="6">
        <v>1.28943651825972</v>
      </c>
      <c r="BF52" s="6">
        <v>1.45962864562199</v>
      </c>
      <c r="BG52" s="6">
        <v>2.30747170708753</v>
      </c>
      <c r="BH52" s="6">
        <v>0.560340230663996</v>
      </c>
      <c r="BI52" s="6">
        <v>0.73964387923229</v>
      </c>
      <c r="BJ52" s="6">
        <v>1.09005963392855</v>
      </c>
      <c r="BK52" s="6">
        <v>2.39257538791969</v>
      </c>
      <c r="BL52" s="6">
        <v>2.15903151866007</v>
      </c>
      <c r="BM52" s="6">
        <v>2.44627989461429</v>
      </c>
      <c r="BN52" s="6">
        <v>1.70184700734217</v>
      </c>
      <c r="BO52" s="6">
        <v>2.30091536365705</v>
      </c>
      <c r="BP52" s="6">
        <v>1.20913065785726</v>
      </c>
      <c r="BQ52" s="6">
        <v>1.1973017640442</v>
      </c>
      <c r="BR52" s="6">
        <v>1.95292975433387</v>
      </c>
      <c r="BS52" s="6">
        <v>2.65461247502446</v>
      </c>
      <c r="BT52" s="6">
        <v>0.686108474597177</v>
      </c>
      <c r="BU52" s="6">
        <v>0.235011531600946</v>
      </c>
      <c r="BV52" s="6">
        <v>1.103272114898</v>
      </c>
      <c r="BW52" s="6">
        <v>1.36701269316757</v>
      </c>
      <c r="BX52" s="6">
        <v>2.41599880714085</v>
      </c>
      <c r="BY52" s="6">
        <v>1.6792353108645</v>
      </c>
      <c r="BZ52" s="6">
        <v>2.8463038057281</v>
      </c>
      <c r="CA52" s="6">
        <v>0.0660424250585265</v>
      </c>
      <c r="CB52" s="6">
        <v>4.14716748740199</v>
      </c>
      <c r="CC52" s="6">
        <v>1.30248211908321</v>
      </c>
      <c r="CD52" s="6">
        <v>-0.132877536796684</v>
      </c>
      <c r="CE52" s="6">
        <v>2.3966885786437</v>
      </c>
      <c r="CF52" s="6">
        <v>0.0488802972592453</v>
      </c>
      <c r="CG52" s="6">
        <v>0.261427495365467</v>
      </c>
      <c r="CH52" s="6">
        <v>0.730687857595683</v>
      </c>
      <c r="CI52" s="6">
        <v>1.80105560416638</v>
      </c>
      <c r="CJ52" s="6">
        <v>2.13933022969945</v>
      </c>
      <c r="CK52" s="6">
        <v>2.48466422662693</v>
      </c>
      <c r="CL52" s="6">
        <v>1.70435879115541</v>
      </c>
      <c r="CM52" s="6">
        <v>1.2505387296834</v>
      </c>
      <c r="CN52" s="6">
        <v>1.29810429937226</v>
      </c>
      <c r="CO52" s="6">
        <v>0.988657275630544</v>
      </c>
      <c r="CP52" s="6">
        <v>0.836036364369875</v>
      </c>
      <c r="CQ52" s="6">
        <v>1.24098880962185</v>
      </c>
      <c r="CR52" s="6">
        <v>0.539151024886223</v>
      </c>
      <c r="CS52" s="6">
        <v>1.91936074401485</v>
      </c>
      <c r="CT52" s="6">
        <v>0.550282807494682</v>
      </c>
    </row>
    <row r="53" spans="2:98" ht="15" customHeight="true">
      <c r="B53" s="6">
        <v>90.5</v>
      </c>
      <c r="C53" s="6">
        <v>3.06548578822765</v>
      </c>
      <c r="D53" s="6">
        <v>3.15812976886997</v>
      </c>
      <c r="E53" s="6">
        <v>3.00404737413334</v>
      </c>
      <c r="F53" s="6">
        <v>4.08090302197303</v>
      </c>
      <c r="G53" s="6">
        <v>3.12954076512125</v>
      </c>
      <c r="H53" s="6">
        <v>4.07873948620602</v>
      </c>
      <c r="I53" s="6">
        <v>3.35837255587614</v>
      </c>
      <c r="J53" s="6">
        <v>2.27236119492676</v>
      </c>
      <c r="K53" s="6">
        <v>2.76899045182074</v>
      </c>
      <c r="L53" s="6">
        <v>1.85402137291078</v>
      </c>
      <c r="M53" s="6">
        <v>1.29497782990245</v>
      </c>
      <c r="N53" s="6">
        <v>1.53966721106684</v>
      </c>
      <c r="O53" s="6">
        <v>4.40021618986646</v>
      </c>
      <c r="P53" s="6">
        <v>2.68786108090609</v>
      </c>
      <c r="Q53" s="6">
        <v>3.29862808247958</v>
      </c>
      <c r="R53" s="6">
        <v>3.81988036099239</v>
      </c>
      <c r="S53" s="6">
        <v>3.16771808707034</v>
      </c>
      <c r="T53" s="6">
        <v>3.46990367968732</v>
      </c>
      <c r="U53" s="6">
        <v>3.08288224656201</v>
      </c>
      <c r="V53" s="6">
        <v>1.71551253823742</v>
      </c>
      <c r="W53" s="6">
        <v>1.40227272491978</v>
      </c>
      <c r="X53" s="6">
        <v>1.4735302943651</v>
      </c>
      <c r="Y53" s="6">
        <v>1.00374401814702</v>
      </c>
      <c r="Z53" s="6">
        <v>0.139056046191399</v>
      </c>
      <c r="AA53" s="6">
        <v>4.56113728364113</v>
      </c>
      <c r="AB53" s="6">
        <v>5.53009179228701</v>
      </c>
      <c r="AC53" s="6">
        <v>2.89106636520864</v>
      </c>
      <c r="AD53" s="6">
        <v>4.28217960585874</v>
      </c>
      <c r="AE53" s="6">
        <v>3.8412471595031</v>
      </c>
      <c r="AF53" s="6">
        <v>3.64188409272202</v>
      </c>
      <c r="AG53" s="6">
        <v>3.00485201241332</v>
      </c>
      <c r="AH53" s="6">
        <v>2.45526682219673</v>
      </c>
      <c r="AI53" s="6">
        <v>3.69961864588151</v>
      </c>
      <c r="AJ53" s="6">
        <v>1.75299600294147</v>
      </c>
      <c r="AK53" s="6">
        <v>1.30413753430042</v>
      </c>
      <c r="AL53" s="6">
        <v>1.26691536443985</v>
      </c>
      <c r="AM53" s="6">
        <v>5.63474613270324</v>
      </c>
      <c r="AN53" s="6">
        <v>5.05573288540074</v>
      </c>
      <c r="AO53" s="6">
        <v>3.59900823614174</v>
      </c>
      <c r="AP53" s="6">
        <v>3.94805501932569</v>
      </c>
      <c r="AQ53" s="6">
        <v>2.7815041381823</v>
      </c>
      <c r="AR53" s="6">
        <v>3.79061682726007</v>
      </c>
      <c r="AS53" s="6">
        <v>2.96322336572138</v>
      </c>
      <c r="AT53" s="6">
        <v>4.52452924143154</v>
      </c>
      <c r="AU53" s="6">
        <v>2.83121943012827</v>
      </c>
      <c r="AV53" s="6">
        <v>2.08826584222072</v>
      </c>
      <c r="AW53" s="6">
        <v>1.62923030923764</v>
      </c>
      <c r="AX53" s="6">
        <v>0.808048782450498</v>
      </c>
      <c r="AY53" s="6">
        <v>1.4952025085845</v>
      </c>
      <c r="AZ53" s="6">
        <v>2.76870945762869</v>
      </c>
      <c r="BA53" s="6">
        <v>2.47095820357777</v>
      </c>
      <c r="BB53" s="6">
        <v>1.12164897512668</v>
      </c>
      <c r="BC53" s="6">
        <v>2.72864912754915</v>
      </c>
      <c r="BD53" s="6">
        <v>2.23916482474362</v>
      </c>
      <c r="BE53" s="6">
        <v>1.56947995986224</v>
      </c>
      <c r="BF53" s="6">
        <v>1.2950922379689</v>
      </c>
      <c r="BG53" s="6">
        <v>2.74354949662319</v>
      </c>
      <c r="BH53" s="6">
        <v>0.932468107833017</v>
      </c>
      <c r="BI53" s="6">
        <v>0.527991534434591</v>
      </c>
      <c r="BJ53" s="6">
        <v>1.59790717834568</v>
      </c>
      <c r="BK53" s="6">
        <v>2.26767538868842</v>
      </c>
      <c r="BL53" s="6">
        <v>1.95219116076038</v>
      </c>
      <c r="BM53" s="6">
        <v>1.96357053937493</v>
      </c>
      <c r="BN53" s="6">
        <v>1.90973679057606</v>
      </c>
      <c r="BO53" s="6">
        <v>2.42810281948823</v>
      </c>
      <c r="BP53" s="6">
        <v>1.72624999852917</v>
      </c>
      <c r="BQ53" s="6">
        <v>1.64307536892341</v>
      </c>
      <c r="BR53" s="6">
        <v>2.28316683405097</v>
      </c>
      <c r="BS53" s="6">
        <v>2.24704309546502</v>
      </c>
      <c r="BT53" s="6">
        <v>0.745390541715437</v>
      </c>
      <c r="BU53" s="6">
        <v>1.12842388000638</v>
      </c>
      <c r="BV53" s="6">
        <v>1.75643519243738</v>
      </c>
      <c r="BW53" s="6">
        <v>1.68207507897807</v>
      </c>
      <c r="BX53" s="6">
        <v>2.56686537983995</v>
      </c>
      <c r="BY53" s="6">
        <v>1.90529497531031</v>
      </c>
      <c r="BZ53" s="6">
        <v>1.82426850692406</v>
      </c>
      <c r="CA53" s="6">
        <v>0.612394002600297</v>
      </c>
      <c r="CB53" s="6">
        <v>4.23769347418107</v>
      </c>
      <c r="CC53" s="6">
        <v>2.65601224017706</v>
      </c>
      <c r="CD53" s="6">
        <v>0.972310184226103</v>
      </c>
      <c r="CE53" s="6">
        <v>1.62311870600308</v>
      </c>
      <c r="CF53" s="6">
        <v>0.0428096767318493</v>
      </c>
      <c r="CG53" s="6">
        <v>1.25205552196707</v>
      </c>
      <c r="CH53" s="6">
        <v>1.58591842930986</v>
      </c>
      <c r="CI53" s="6">
        <v>1.45967914530377</v>
      </c>
      <c r="CJ53" s="6">
        <v>2.41291224843155</v>
      </c>
      <c r="CK53" s="6">
        <v>2.02958641869657</v>
      </c>
      <c r="CL53" s="6">
        <v>2.21809457511796</v>
      </c>
      <c r="CM53" s="6">
        <v>2.15772220951311</v>
      </c>
      <c r="CN53" s="6">
        <v>1.60366802157307</v>
      </c>
      <c r="CO53" s="6">
        <v>1.58584197666522</v>
      </c>
      <c r="CP53" s="6">
        <v>1.4033590909325</v>
      </c>
      <c r="CQ53" s="6">
        <v>1.04382810685422</v>
      </c>
      <c r="CR53" s="6">
        <v>1.14612123040456</v>
      </c>
      <c r="CS53" s="6">
        <v>2.05584820957108</v>
      </c>
      <c r="CT53" s="6">
        <v>0.672649544599778</v>
      </c>
    </row>
    <row r="54" spans="2:98" ht="15" customHeight="true">
      <c r="B54" s="6">
        <v>91</v>
      </c>
      <c r="C54" s="6">
        <v>2.40456727801592</v>
      </c>
      <c r="D54" s="6">
        <v>2.33393275835999</v>
      </c>
      <c r="E54" s="6">
        <v>2.21002316377059</v>
      </c>
      <c r="F54" s="6">
        <v>3.02933558826709</v>
      </c>
      <c r="G54" s="6">
        <v>1.54928977502266</v>
      </c>
      <c r="H54" s="6">
        <v>2.56752822477904</v>
      </c>
      <c r="I54" s="6">
        <v>1.72477994027059</v>
      </c>
      <c r="J54" s="6">
        <v>2.6030206848157</v>
      </c>
      <c r="K54" s="6">
        <v>2.26562484698792</v>
      </c>
      <c r="L54" s="6">
        <v>1.6544369134545</v>
      </c>
      <c r="M54" s="6">
        <v>1.37924994141184</v>
      </c>
      <c r="N54" s="6">
        <v>1.96065670706952</v>
      </c>
      <c r="O54" s="6">
        <v>2.3371740351522</v>
      </c>
      <c r="P54" s="6">
        <v>1.52880746007696</v>
      </c>
      <c r="Q54" s="6">
        <v>2.511259435939</v>
      </c>
      <c r="R54" s="6">
        <v>2.60409510255846</v>
      </c>
      <c r="S54" s="6">
        <v>2.56458393728587</v>
      </c>
      <c r="T54" s="6">
        <v>2.39473732470304</v>
      </c>
      <c r="U54" s="6">
        <v>2.14743035493575</v>
      </c>
      <c r="V54" s="6">
        <v>1.56918922655666</v>
      </c>
      <c r="W54" s="6">
        <v>1.12391981339454</v>
      </c>
      <c r="X54" s="6">
        <v>1.63158123036817</v>
      </c>
      <c r="Y54" s="6">
        <v>0.470170731823089</v>
      </c>
      <c r="Z54" s="6">
        <v>0.618289465822045</v>
      </c>
      <c r="AA54" s="6">
        <v>1.55860938903976</v>
      </c>
      <c r="AB54" s="6">
        <v>3.00487676193217</v>
      </c>
      <c r="AC54" s="6">
        <v>1.94171891947764</v>
      </c>
      <c r="AD54" s="6">
        <v>2.47150750169664</v>
      </c>
      <c r="AE54" s="6">
        <v>2.79866348268956</v>
      </c>
      <c r="AF54" s="6">
        <v>1.80667467331142</v>
      </c>
      <c r="AG54" s="6">
        <v>2.15371957275818</v>
      </c>
      <c r="AH54" s="6">
        <v>2.1124471460833</v>
      </c>
      <c r="AI54" s="6">
        <v>2.24704508777796</v>
      </c>
      <c r="AJ54" s="6">
        <v>1.79760953161849</v>
      </c>
      <c r="AK54" s="6">
        <v>1.60048554590145</v>
      </c>
      <c r="AL54" s="6">
        <v>1.93782850628389</v>
      </c>
      <c r="AM54" s="6">
        <v>2.47076841562478</v>
      </c>
      <c r="AN54" s="6">
        <v>2.78506404984876</v>
      </c>
      <c r="AO54" s="6">
        <v>2.84570217041409</v>
      </c>
      <c r="AP54" s="6">
        <v>2.48351608651114</v>
      </c>
      <c r="AQ54" s="6">
        <v>2.01524833664979</v>
      </c>
      <c r="AR54" s="6">
        <v>2.81252944180096</v>
      </c>
      <c r="AS54" s="6">
        <v>1.73820485993969</v>
      </c>
      <c r="AT54" s="6">
        <v>2.55579425211067</v>
      </c>
      <c r="AU54" s="6">
        <v>2.61975822009896</v>
      </c>
      <c r="AV54" s="6">
        <v>0.998002059386294</v>
      </c>
      <c r="AW54" s="6">
        <v>1.73828910940676</v>
      </c>
      <c r="AX54" s="6">
        <v>0.976134309794759</v>
      </c>
      <c r="AY54" s="6">
        <v>1.80218727494338</v>
      </c>
      <c r="AZ54" s="6">
        <v>2.49183024291096</v>
      </c>
      <c r="BA54" s="6">
        <v>2.72702306662535</v>
      </c>
      <c r="BB54" s="6">
        <v>1.58195959044298</v>
      </c>
      <c r="BC54" s="6">
        <v>3.12913344731891</v>
      </c>
      <c r="BD54" s="6">
        <v>1.64617962630507</v>
      </c>
      <c r="BE54" s="6">
        <v>1.99586437366952</v>
      </c>
      <c r="BF54" s="6">
        <v>1.44937589615336</v>
      </c>
      <c r="BG54" s="6">
        <v>2.93041458493707</v>
      </c>
      <c r="BH54" s="6">
        <v>1.08813572238864</v>
      </c>
      <c r="BI54" s="6">
        <v>0.0951962162302493</v>
      </c>
      <c r="BJ54" s="6">
        <v>1.83804728043526</v>
      </c>
      <c r="BK54" s="6">
        <v>2.6771713075895</v>
      </c>
      <c r="BL54" s="6">
        <v>1.7553519424319</v>
      </c>
      <c r="BM54" s="6">
        <v>1.80996079240077</v>
      </c>
      <c r="BN54" s="6">
        <v>2.09510653338231</v>
      </c>
      <c r="BO54" s="6">
        <v>2.33357722183115</v>
      </c>
      <c r="BP54" s="6">
        <v>2.3659636345979</v>
      </c>
      <c r="BQ54" s="6">
        <v>2.3537384596878</v>
      </c>
      <c r="BR54" s="6">
        <v>2.16795128300947</v>
      </c>
      <c r="BS54" s="6">
        <v>2.49329476932155</v>
      </c>
      <c r="BT54" s="6">
        <v>1.07742977058524</v>
      </c>
      <c r="BU54" s="6">
        <v>1.49856434701763</v>
      </c>
      <c r="BV54" s="6">
        <v>1.57992031230145</v>
      </c>
      <c r="BW54" s="6">
        <v>2.28418932591774</v>
      </c>
      <c r="BX54" s="6">
        <v>3.0946248400893</v>
      </c>
      <c r="BY54" s="6">
        <v>1.95986569323657</v>
      </c>
      <c r="BZ54" s="6">
        <v>1.29546825190772</v>
      </c>
      <c r="CA54" s="6">
        <v>1.60562199776899</v>
      </c>
      <c r="CB54" s="6">
        <v>4.32850527785081</v>
      </c>
      <c r="CC54" s="6">
        <v>2.86577194001507</v>
      </c>
      <c r="CD54" s="6">
        <v>1.8583087932692</v>
      </c>
      <c r="CE54" s="6">
        <v>1.34134470470974</v>
      </c>
      <c r="CF54" s="6">
        <v>0.59391824959647</v>
      </c>
      <c r="CG54" s="6">
        <v>1.66256639769875</v>
      </c>
      <c r="CH54" s="6">
        <v>1.80430119568109</v>
      </c>
      <c r="CI54" s="6">
        <v>1.48272580585865</v>
      </c>
      <c r="CJ54" s="6">
        <v>2.44853459777937</v>
      </c>
      <c r="CK54" s="6">
        <v>2.44467950105343</v>
      </c>
      <c r="CL54" s="6">
        <v>2.84225629037297</v>
      </c>
      <c r="CM54" s="6">
        <v>2.7303385539671</v>
      </c>
      <c r="CN54" s="6">
        <v>1.98420909133722</v>
      </c>
      <c r="CO54" s="6">
        <v>1.45607468898874</v>
      </c>
      <c r="CP54" s="6">
        <v>1.69125669857226</v>
      </c>
      <c r="CQ54" s="6">
        <v>1.59469869927727</v>
      </c>
      <c r="CR54" s="6">
        <v>1.40694997526708</v>
      </c>
      <c r="CS54" s="6">
        <v>1.6734895961244</v>
      </c>
      <c r="CT54" s="6">
        <v>1.14803988473199</v>
      </c>
    </row>
    <row r="55" spans="2:98" ht="15" customHeight="true">
      <c r="B55" s="6">
        <v>91.5</v>
      </c>
      <c r="C55" s="6">
        <v>2.53438894216328</v>
      </c>
      <c r="D55" s="6">
        <v>2.58256253539804</v>
      </c>
      <c r="E55" s="6">
        <v>1.56902629325975</v>
      </c>
      <c r="F55" s="6">
        <v>2.52712336113996</v>
      </c>
      <c r="G55" s="6">
        <v>1.00853010977994</v>
      </c>
      <c r="H55" s="6">
        <v>1.90953443117951</v>
      </c>
      <c r="I55" s="6">
        <v>1.32875369692141</v>
      </c>
      <c r="J55" s="6">
        <v>3.15128710905384</v>
      </c>
      <c r="K55" s="6">
        <v>1.59752313180763</v>
      </c>
      <c r="L55" s="6">
        <v>1.07125077826731</v>
      </c>
      <c r="M55" s="6">
        <v>0.955540668194317</v>
      </c>
      <c r="N55" s="6">
        <v>1.8658164504493</v>
      </c>
      <c r="O55" s="6">
        <v>2.74056782847913</v>
      </c>
      <c r="P55" s="6">
        <v>2.16236157097541</v>
      </c>
      <c r="Q55" s="6">
        <v>2.64354582658234</v>
      </c>
      <c r="R55" s="6">
        <v>1.98475282842941</v>
      </c>
      <c r="S55" s="6">
        <v>2.54725934878491</v>
      </c>
      <c r="T55" s="6">
        <v>2.19953286144272</v>
      </c>
      <c r="U55" s="6">
        <v>0.940781360841356</v>
      </c>
      <c r="V55" s="6">
        <v>1.72993792806841</v>
      </c>
      <c r="W55" s="6">
        <v>1.55071949200845</v>
      </c>
      <c r="X55" s="6">
        <v>1.76287068051636</v>
      </c>
      <c r="Y55" s="6">
        <v>0.510140192191784</v>
      </c>
      <c r="Z55" s="6">
        <v>0.293363220151775</v>
      </c>
      <c r="AA55" s="6">
        <v>1.77885422575099</v>
      </c>
      <c r="AB55" s="6">
        <v>2.85347463495333</v>
      </c>
      <c r="AC55" s="6">
        <v>2.24329200138897</v>
      </c>
      <c r="AD55" s="6">
        <v>2.01239010939679</v>
      </c>
      <c r="AE55" s="6">
        <v>1.85587133093981</v>
      </c>
      <c r="AF55" s="6">
        <v>2.24133296425714</v>
      </c>
      <c r="AG55" s="6">
        <v>1.46820139865787</v>
      </c>
      <c r="AH55" s="6">
        <v>1.76293915831565</v>
      </c>
      <c r="AI55" s="6">
        <v>2.00407670537885</v>
      </c>
      <c r="AJ55" s="6">
        <v>1.57523185377192</v>
      </c>
      <c r="AK55" s="6">
        <v>1.59522444950784</v>
      </c>
      <c r="AL55" s="6">
        <v>1.68798321318997</v>
      </c>
      <c r="AM55" s="6">
        <v>2.15310914407348</v>
      </c>
      <c r="AN55" s="6">
        <v>2.88496633215749</v>
      </c>
      <c r="AO55" s="6">
        <v>2.47569011626325</v>
      </c>
      <c r="AP55" s="6">
        <v>2.32013669685011</v>
      </c>
      <c r="AQ55" s="6">
        <v>1.55563572043422</v>
      </c>
      <c r="AR55" s="6">
        <v>2.91033569797747</v>
      </c>
      <c r="AS55" s="6">
        <v>1.5963228335097</v>
      </c>
      <c r="AT55" s="6">
        <v>2.30435704313123</v>
      </c>
      <c r="AU55" s="6">
        <v>2.46516993759695</v>
      </c>
      <c r="AV55" s="6">
        <v>0.138398289155191</v>
      </c>
      <c r="AW55" s="6">
        <v>1.8295510922739</v>
      </c>
      <c r="AX55" s="6">
        <v>1.42415364668238</v>
      </c>
      <c r="AY55" s="6">
        <v>1.94277832416537</v>
      </c>
      <c r="AZ55" s="6">
        <v>2.55650436913191</v>
      </c>
      <c r="BA55" s="6">
        <v>2.42112083662062</v>
      </c>
      <c r="BB55" s="6">
        <v>1.83275946274898</v>
      </c>
      <c r="BC55" s="6">
        <v>2.23454210547283</v>
      </c>
      <c r="BD55" s="6">
        <v>1.74813088923531</v>
      </c>
      <c r="BE55" s="6">
        <v>2.03064011142124</v>
      </c>
      <c r="BF55" s="6">
        <v>1.55001651751974</v>
      </c>
      <c r="BG55" s="6">
        <v>2.91408191128801</v>
      </c>
      <c r="BH55" s="6">
        <v>0.724441456611658</v>
      </c>
      <c r="BI55" s="6">
        <v>-0.0215668362937436</v>
      </c>
      <c r="BJ55" s="6">
        <v>1.7832814828011</v>
      </c>
      <c r="BK55" s="6">
        <v>2.81486032792179</v>
      </c>
      <c r="BL55" s="6">
        <v>1.51450519414522</v>
      </c>
      <c r="BM55" s="6">
        <v>1.93460974041483</v>
      </c>
      <c r="BN55" s="6">
        <v>2.14108099164514</v>
      </c>
      <c r="BO55" s="6">
        <v>1.91091447631982</v>
      </c>
      <c r="BP55" s="6">
        <v>2.57966564324079</v>
      </c>
      <c r="BQ55" s="6">
        <v>2.4523727140496</v>
      </c>
      <c r="BR55" s="6">
        <v>1.63732380026005</v>
      </c>
      <c r="BS55" s="6">
        <v>2.3755313835872</v>
      </c>
      <c r="BT55" s="6">
        <v>1.30916655402416</v>
      </c>
      <c r="BU55" s="6">
        <v>1.87975068107062</v>
      </c>
      <c r="BV55" s="6">
        <v>0.912663119412741</v>
      </c>
      <c r="BW55" s="6">
        <v>1.91682164953846</v>
      </c>
      <c r="BX55" s="6">
        <v>3.1082524311841</v>
      </c>
      <c r="BY55" s="6">
        <v>2.38059554468157</v>
      </c>
      <c r="BZ55" s="6">
        <v>1.21026576225211</v>
      </c>
      <c r="CA55" s="6">
        <v>2.08134471665005</v>
      </c>
      <c r="CB55" s="6">
        <v>4.01684000717734</v>
      </c>
      <c r="CC55" s="6">
        <v>2.73099325431451</v>
      </c>
      <c r="CD55" s="6">
        <v>2.80657113877135</v>
      </c>
      <c r="CE55" s="6">
        <v>1.30379289910809</v>
      </c>
      <c r="CF55" s="6">
        <v>1.06317112911006</v>
      </c>
      <c r="CG55" s="6">
        <v>1.33489554288883</v>
      </c>
      <c r="CH55" s="6">
        <v>1.32419409102522</v>
      </c>
      <c r="CI55" s="6">
        <v>1.52920941333844</v>
      </c>
      <c r="CJ55" s="6">
        <v>2.44764035453471</v>
      </c>
      <c r="CK55" s="6">
        <v>2.19796070190705</v>
      </c>
      <c r="CL55" s="6">
        <v>3.17872315449705</v>
      </c>
      <c r="CM55" s="6">
        <v>2.35608493963156</v>
      </c>
      <c r="CN55" s="6">
        <v>1.94945498823682</v>
      </c>
      <c r="CO55" s="6">
        <v>1.74432367583319</v>
      </c>
      <c r="CP55" s="6">
        <v>1.43242423940478</v>
      </c>
      <c r="CQ55" s="6">
        <v>2.20116076845858</v>
      </c>
      <c r="CR55" s="6">
        <v>1.40274775536545</v>
      </c>
      <c r="CS55" s="6">
        <v>1.54577844685804</v>
      </c>
      <c r="CT55" s="6">
        <v>1.20322274018548</v>
      </c>
    </row>
    <row r="56" spans="2:98" ht="15" customHeight="true">
      <c r="B56" s="6">
        <v>92</v>
      </c>
      <c r="C56" s="6">
        <v>1.90271880726254</v>
      </c>
      <c r="D56" s="6">
        <v>2.29069158571048</v>
      </c>
      <c r="E56" s="6">
        <v>1.6172209405637</v>
      </c>
      <c r="F56" s="6">
        <v>1.75613122257857</v>
      </c>
      <c r="G56" s="6">
        <v>0.820453346659974</v>
      </c>
      <c r="H56" s="6">
        <v>1.75032269553191</v>
      </c>
      <c r="I56" s="6">
        <v>1.65006069978779</v>
      </c>
      <c r="J56" s="6">
        <v>2.61406452286968</v>
      </c>
      <c r="K56" s="6">
        <v>1.26930164054301</v>
      </c>
      <c r="L56" s="6">
        <v>0.88598225213633</v>
      </c>
      <c r="M56" s="6">
        <v>0.16817901949139</v>
      </c>
      <c r="N56" s="6">
        <v>1.85809995425433</v>
      </c>
      <c r="O56" s="6">
        <v>2.86971239945308</v>
      </c>
      <c r="P56" s="6">
        <v>2.31436482307464</v>
      </c>
      <c r="Q56" s="6">
        <v>2.03980316929261</v>
      </c>
      <c r="R56" s="6">
        <v>1.54548449443439</v>
      </c>
      <c r="S56" s="6">
        <v>1.80921309188369</v>
      </c>
      <c r="T56" s="6">
        <v>2.16074072905337</v>
      </c>
      <c r="U56" s="6">
        <v>0.438826639192826</v>
      </c>
      <c r="V56" s="6">
        <v>1.60010290747647</v>
      </c>
      <c r="W56" s="6">
        <v>1.04331299992208</v>
      </c>
      <c r="X56" s="6">
        <v>1.3582829788981</v>
      </c>
      <c r="Y56" s="6">
        <v>0.922438061749062</v>
      </c>
      <c r="Z56" s="6">
        <v>0.535633909756996</v>
      </c>
      <c r="AA56" s="6">
        <v>2.0495777585673</v>
      </c>
      <c r="AB56" s="6">
        <v>2.27668656121801</v>
      </c>
      <c r="AC56" s="6">
        <v>1.83418019427597</v>
      </c>
      <c r="AD56" s="6">
        <v>1.79159339718598</v>
      </c>
      <c r="AE56" s="6">
        <v>1.38238400025557</v>
      </c>
      <c r="AF56" s="6">
        <v>1.89765036269569</v>
      </c>
      <c r="AG56" s="6">
        <v>1.85748267434582</v>
      </c>
      <c r="AH56" s="6">
        <v>1.77120975447781</v>
      </c>
      <c r="AI56" s="6">
        <v>1.74858746054025</v>
      </c>
      <c r="AJ56" s="6">
        <v>1.32602006484916</v>
      </c>
      <c r="AK56" s="6">
        <v>1.51207187696701</v>
      </c>
      <c r="AL56" s="6">
        <v>1.41618448422076</v>
      </c>
      <c r="AM56" s="6">
        <v>2.03913124550235</v>
      </c>
      <c r="AN56" s="6">
        <v>2.61859020647461</v>
      </c>
      <c r="AO56" s="6">
        <v>1.83721293898708</v>
      </c>
      <c r="AP56" s="6">
        <v>2.32269794990032</v>
      </c>
      <c r="AQ56" s="6">
        <v>1.2393326971939</v>
      </c>
      <c r="AR56" s="6">
        <v>3.28565839638856</v>
      </c>
      <c r="AS56" s="6">
        <v>1.7996495122772</v>
      </c>
      <c r="AT56" s="6">
        <v>2.09083656706321</v>
      </c>
      <c r="AU56" s="6">
        <v>1.76171803098583</v>
      </c>
      <c r="AV56" s="6">
        <v>0.273950654263786</v>
      </c>
      <c r="AW56" s="6">
        <v>2.12031064950702</v>
      </c>
      <c r="AX56" s="6">
        <v>1.60665236906897</v>
      </c>
      <c r="AY56" s="6">
        <v>2.14880212116913</v>
      </c>
      <c r="AZ56" s="6">
        <v>2.00877834926314</v>
      </c>
      <c r="BA56" s="6">
        <v>2.13499138510736</v>
      </c>
      <c r="BB56" s="6">
        <v>1.90629972837064</v>
      </c>
      <c r="BC56" s="6">
        <v>1.72574811313609</v>
      </c>
      <c r="BD56" s="6">
        <v>2.57565407566204</v>
      </c>
      <c r="BE56" s="6">
        <v>1.88189835547212</v>
      </c>
      <c r="BF56" s="6">
        <v>1.66002431108416</v>
      </c>
      <c r="BG56" s="6">
        <v>2.23041160292763</v>
      </c>
      <c r="BH56" s="6">
        <v>0.254322914494196</v>
      </c>
      <c r="BI56" s="6">
        <v>0.152849357771743</v>
      </c>
      <c r="BJ56" s="6">
        <v>1.63983022831405</v>
      </c>
      <c r="BK56" s="6">
        <v>1.98112766573735</v>
      </c>
      <c r="BL56" s="6">
        <v>1.44469521221174</v>
      </c>
      <c r="BM56" s="6">
        <v>1.17032667851333</v>
      </c>
      <c r="BN56" s="6">
        <v>2.11994848015138</v>
      </c>
      <c r="BO56" s="6">
        <v>1.58842032775425</v>
      </c>
      <c r="BP56" s="6">
        <v>2.41245074796473</v>
      </c>
      <c r="BQ56" s="6">
        <v>2.18967950983085</v>
      </c>
      <c r="BR56" s="6">
        <v>1.56502638307705</v>
      </c>
      <c r="BS56" s="6">
        <v>2.0670574125337</v>
      </c>
      <c r="BT56" s="6">
        <v>0.983294441077192</v>
      </c>
      <c r="BU56" s="6">
        <v>1.39037704611189</v>
      </c>
      <c r="BV56" s="6">
        <v>1.086213820181</v>
      </c>
      <c r="BW56" s="6">
        <v>1.77787287094782</v>
      </c>
      <c r="BX56" s="6">
        <v>2.81897692612159</v>
      </c>
      <c r="BY56" s="6">
        <v>2.78520519552063</v>
      </c>
      <c r="BZ56" s="6">
        <v>1.26643926125911</v>
      </c>
      <c r="CA56" s="6">
        <v>2.4438187004165</v>
      </c>
      <c r="CB56" s="6">
        <v>3.45921960069677</v>
      </c>
      <c r="CC56" s="6">
        <v>2.8760594998202</v>
      </c>
      <c r="CD56" s="6">
        <v>3.19912762334593</v>
      </c>
      <c r="CE56" s="6">
        <v>1.00822385077294</v>
      </c>
      <c r="CF56" s="6">
        <v>1.17909421697385</v>
      </c>
      <c r="CG56" s="6">
        <v>1.40939008074832</v>
      </c>
      <c r="CH56" s="6">
        <v>1.06009202966783</v>
      </c>
      <c r="CI56" s="6">
        <v>1.32351503017082</v>
      </c>
      <c r="CJ56" s="6">
        <v>1.96904690217627</v>
      </c>
      <c r="CK56" s="6">
        <v>1.19298158594722</v>
      </c>
      <c r="CL56" s="6">
        <v>3.2163530801659</v>
      </c>
      <c r="CM56" s="6">
        <v>2.22884655282093</v>
      </c>
      <c r="CN56" s="6">
        <v>1.74456545487703</v>
      </c>
      <c r="CO56" s="6">
        <v>2.27746687908308</v>
      </c>
      <c r="CP56" s="6">
        <v>1.42049569621929</v>
      </c>
      <c r="CQ56" s="6">
        <v>2.06479430615826</v>
      </c>
      <c r="CR56" s="6">
        <v>1.00583255637804</v>
      </c>
      <c r="CS56" s="6">
        <v>1.54219921881554</v>
      </c>
      <c r="CT56" s="6">
        <v>0.983503470583514</v>
      </c>
    </row>
    <row r="57" spans="2:98" ht="15" customHeight="true">
      <c r="B57" s="6">
        <v>92.5</v>
      </c>
      <c r="C57" s="6">
        <v>1.72567078729656</v>
      </c>
      <c r="D57" s="6">
        <v>1.69949803869349</v>
      </c>
      <c r="E57" s="6">
        <v>1.99963513273752</v>
      </c>
      <c r="F57" s="6">
        <v>1.46006608477938</v>
      </c>
      <c r="G57" s="6">
        <v>0.665582250260172</v>
      </c>
      <c r="H57" s="6">
        <v>1.70021640339979</v>
      </c>
      <c r="I57" s="6">
        <v>1.42230285488182</v>
      </c>
      <c r="J57" s="6">
        <v>1.6693676992258</v>
      </c>
      <c r="K57" s="6">
        <v>1.13928326773646</v>
      </c>
      <c r="L57" s="6">
        <v>1.17254057291444</v>
      </c>
      <c r="M57" s="6">
        <v>0.0648015941688982</v>
      </c>
      <c r="N57" s="6">
        <v>1.03476101537706</v>
      </c>
      <c r="O57" s="6">
        <v>2.21228525032063</v>
      </c>
      <c r="P57" s="6">
        <v>2.27202557845612</v>
      </c>
      <c r="Q57" s="6">
        <v>1.19813698861122</v>
      </c>
      <c r="R57" s="6">
        <v>0.860353844915664</v>
      </c>
      <c r="S57" s="6">
        <v>0.598502811806213</v>
      </c>
      <c r="T57" s="6">
        <v>1.88175353869281</v>
      </c>
      <c r="U57" s="6">
        <v>0.438667544009888</v>
      </c>
      <c r="V57" s="6">
        <v>1.27056452567734</v>
      </c>
      <c r="W57" s="6">
        <v>0.258400172199288</v>
      </c>
      <c r="X57" s="6">
        <v>0.94754056121468</v>
      </c>
      <c r="Y57" s="6">
        <v>0.827728182978035</v>
      </c>
      <c r="Z57" s="6">
        <v>1.40707818843453</v>
      </c>
      <c r="AA57" s="6">
        <v>2.05525143138112</v>
      </c>
      <c r="AB57" s="6">
        <v>2.43902911048497</v>
      </c>
      <c r="AC57" s="6">
        <v>1.26626960724809</v>
      </c>
      <c r="AD57" s="6">
        <v>1.4025632085503</v>
      </c>
      <c r="AE57" s="6">
        <v>1.36993191812758</v>
      </c>
      <c r="AF57" s="6">
        <v>1.5069506675934</v>
      </c>
      <c r="AG57" s="6">
        <v>2.54182162646106</v>
      </c>
      <c r="AH57" s="6">
        <v>2.16675819856795</v>
      </c>
      <c r="AI57" s="6">
        <v>0.864590154072459</v>
      </c>
      <c r="AJ57" s="6">
        <v>1.10546097208908</v>
      </c>
      <c r="AK57" s="6">
        <v>1.25775657157322</v>
      </c>
      <c r="AL57" s="6">
        <v>1.34030358764863</v>
      </c>
      <c r="AM57" s="6">
        <v>1.5447340396999</v>
      </c>
      <c r="AN57" s="6">
        <v>2.12398397725377</v>
      </c>
      <c r="AO57" s="6">
        <v>1.94090606340382</v>
      </c>
      <c r="AP57" s="6">
        <v>1.94550508533013</v>
      </c>
      <c r="AQ57" s="6">
        <v>1.0588356925266</v>
      </c>
      <c r="AR57" s="6">
        <v>2.76239609704118</v>
      </c>
      <c r="AS57" s="6">
        <v>1.33890112314788</v>
      </c>
      <c r="AT57" s="6">
        <v>1.37279871303588</v>
      </c>
      <c r="AU57" s="6">
        <v>0.697514762986543</v>
      </c>
      <c r="AV57" s="6">
        <v>-0.0453847304027022</v>
      </c>
      <c r="AW57" s="6">
        <v>1.78698726548191</v>
      </c>
      <c r="AX57" s="6">
        <v>1.38288780138572</v>
      </c>
      <c r="AY57" s="6">
        <v>2.35892715912598</v>
      </c>
      <c r="AZ57" s="6">
        <v>0.940932893154468</v>
      </c>
      <c r="BA57" s="6">
        <v>1.54939683034576</v>
      </c>
      <c r="BB57" s="6">
        <v>1.80342787003292</v>
      </c>
      <c r="BC57" s="6">
        <v>2.14336170234634</v>
      </c>
      <c r="BD57" s="6">
        <v>2.52561766075877</v>
      </c>
      <c r="BE57" s="6">
        <v>1.96704788386921</v>
      </c>
      <c r="BF57" s="6">
        <v>2.007073181034</v>
      </c>
      <c r="BG57" s="6">
        <v>1.21779474913086</v>
      </c>
      <c r="BH57" s="6">
        <v>0.233682152156575</v>
      </c>
      <c r="BI57" s="6">
        <v>0.47017554405528</v>
      </c>
      <c r="BJ57" s="6">
        <v>0.994920897943359</v>
      </c>
      <c r="BK57" s="6">
        <v>0.924099141551437</v>
      </c>
      <c r="BL57" s="6">
        <v>1.39157943476079</v>
      </c>
      <c r="BM57" s="6">
        <v>0.57268863128752</v>
      </c>
      <c r="BN57" s="6">
        <v>1.59153816311647</v>
      </c>
      <c r="BO57" s="6">
        <v>1.48742177561593</v>
      </c>
      <c r="BP57" s="6">
        <v>2.35423434097567</v>
      </c>
      <c r="BQ57" s="6">
        <v>1.81264938175684</v>
      </c>
      <c r="BR57" s="6">
        <v>1.39551106769977</v>
      </c>
      <c r="BS57" s="6">
        <v>2.31597642527248</v>
      </c>
      <c r="BT57" s="6">
        <v>0.741655520864697</v>
      </c>
      <c r="BU57" s="6">
        <v>0.338468351523375</v>
      </c>
      <c r="BV57" s="6">
        <v>1.11109650586764</v>
      </c>
      <c r="BW57" s="6">
        <v>1.83956818275573</v>
      </c>
      <c r="BX57" s="6">
        <v>2.52469830318154</v>
      </c>
      <c r="BY57" s="6">
        <v>2.71030050937873</v>
      </c>
      <c r="BZ57" s="6">
        <v>1.58114139173733</v>
      </c>
      <c r="CA57" s="6">
        <v>2.82332533695222</v>
      </c>
      <c r="CB57" s="6">
        <v>3.07574154381427</v>
      </c>
      <c r="CC57" s="6">
        <v>2.24736776590578</v>
      </c>
      <c r="CD57" s="6">
        <v>2.91993649896335</v>
      </c>
      <c r="CE57" s="6">
        <v>0.635377594630825</v>
      </c>
      <c r="CF57" s="6">
        <v>1.42005895965292</v>
      </c>
      <c r="CG57" s="6">
        <v>1.19539794640991</v>
      </c>
      <c r="CH57" s="6">
        <v>0.807990409100739</v>
      </c>
      <c r="CI57" s="6">
        <v>1.52745316118478</v>
      </c>
      <c r="CJ57" s="6">
        <v>1.49629424995709</v>
      </c>
      <c r="CK57" s="6">
        <v>0.87697510512885</v>
      </c>
      <c r="CL57" s="6">
        <v>3.06161767659444</v>
      </c>
      <c r="CM57" s="6">
        <v>2.26578808430901</v>
      </c>
      <c r="CN57" s="6">
        <v>1.1053976923655</v>
      </c>
      <c r="CO57" s="6">
        <v>1.65147803223266</v>
      </c>
      <c r="CP57" s="6">
        <v>1.18708263498752</v>
      </c>
      <c r="CQ57" s="6">
        <v>1.9224695803253</v>
      </c>
      <c r="CR57" s="6">
        <v>0.328512375469927</v>
      </c>
      <c r="CS57" s="6">
        <v>1.01449375915365</v>
      </c>
      <c r="CT57" s="6">
        <v>1.08181445175541</v>
      </c>
    </row>
    <row r="58" spans="2:98" ht="15" customHeight="true">
      <c r="B58" s="6">
        <v>93</v>
      </c>
      <c r="C58" s="6">
        <v>1.21713039846412</v>
      </c>
      <c r="D58" s="6">
        <v>0.672482679818131</v>
      </c>
      <c r="E58" s="6">
        <v>1.48943413078024</v>
      </c>
      <c r="F58" s="6">
        <v>0.994374224571402</v>
      </c>
      <c r="G58" s="6">
        <v>0.69812374306207</v>
      </c>
      <c r="H58" s="6">
        <v>1.4970037373489</v>
      </c>
      <c r="I58" s="6">
        <v>0.93405983649626</v>
      </c>
      <c r="J58" s="6">
        <v>0.774285790758256</v>
      </c>
      <c r="K58" s="6">
        <v>0.950044075513347</v>
      </c>
      <c r="L58" s="6">
        <v>0.904281333981373</v>
      </c>
      <c r="M58" s="6">
        <v>0.0587195930686448</v>
      </c>
      <c r="N58" s="6">
        <v>0.310420268043117</v>
      </c>
      <c r="O58" s="6">
        <v>1.29057064461557</v>
      </c>
      <c r="P58" s="6">
        <v>2.26371937675987</v>
      </c>
      <c r="Q58" s="6">
        <v>0.707898919541662</v>
      </c>
      <c r="R58" s="6">
        <v>0.302989704700963</v>
      </c>
      <c r="S58" s="6">
        <v>-0.361494956036381</v>
      </c>
      <c r="T58" s="6">
        <v>1.69999577684769</v>
      </c>
      <c r="U58" s="6">
        <v>0.578568676590805</v>
      </c>
      <c r="V58" s="6">
        <v>0.567420249749944</v>
      </c>
      <c r="W58" s="6">
        <v>0.1948210071875</v>
      </c>
      <c r="X58" s="6">
        <v>0.841583035724796</v>
      </c>
      <c r="Y58" s="6">
        <v>0.793492433619974</v>
      </c>
      <c r="Z58" s="6">
        <v>1.40301259197076</v>
      </c>
      <c r="AA58" s="6">
        <v>1.70602936116921</v>
      </c>
      <c r="AB58" s="6">
        <v>2.0801544986677</v>
      </c>
      <c r="AC58" s="6">
        <v>1.22265941279448</v>
      </c>
      <c r="AD58" s="6">
        <v>0.894922169031304</v>
      </c>
      <c r="AE58" s="6">
        <v>1.08338270437997</v>
      </c>
      <c r="AF58" s="6">
        <v>2.09461350788052</v>
      </c>
      <c r="AG58" s="6">
        <v>2.3169745527386</v>
      </c>
      <c r="AH58" s="6">
        <v>2.40974091732357</v>
      </c>
      <c r="AI58" s="6">
        <v>0.846730379480903</v>
      </c>
      <c r="AJ58" s="6">
        <v>0.0851962750103894</v>
      </c>
      <c r="AK58" s="6">
        <v>1.07038984850948</v>
      </c>
      <c r="AL58" s="6">
        <v>0.733201553132233</v>
      </c>
      <c r="AM58" s="6">
        <v>0.611281734286479</v>
      </c>
      <c r="AN58" s="6">
        <v>1.70812858565802</v>
      </c>
      <c r="AO58" s="6">
        <v>1.69377693722214</v>
      </c>
      <c r="AP58" s="6">
        <v>1.75796641336416</v>
      </c>
      <c r="AQ58" s="6">
        <v>0.988690876649571</v>
      </c>
      <c r="AR58" s="6">
        <v>1.34511556153774</v>
      </c>
      <c r="AS58" s="6">
        <v>0.831271050659041</v>
      </c>
      <c r="AT58" s="6">
        <v>1.0580615464188</v>
      </c>
      <c r="AU58" s="6">
        <v>0.138153379770188</v>
      </c>
      <c r="AV58" s="6">
        <v>-0.231253052479474</v>
      </c>
      <c r="AW58" s="6">
        <v>1.37476304163624</v>
      </c>
      <c r="AX58" s="6">
        <v>1.60124635820813</v>
      </c>
      <c r="AY58" s="6">
        <v>2.60017631412336</v>
      </c>
      <c r="AZ58" s="6">
        <v>0.726703709543017</v>
      </c>
      <c r="BA58" s="6">
        <v>1.00693012312894</v>
      </c>
      <c r="BB58" s="6">
        <v>1.55155182782966</v>
      </c>
      <c r="BC58" s="6">
        <v>1.49187557663475</v>
      </c>
      <c r="BD58" s="6">
        <v>2.38333702842584</v>
      </c>
      <c r="BE58" s="6">
        <v>1.22501474570049</v>
      </c>
      <c r="BF58" s="6">
        <v>1.67480493829532</v>
      </c>
      <c r="BG58" s="6">
        <v>0.485071637007081</v>
      </c>
      <c r="BH58" s="6">
        <v>-0.0514902045763392</v>
      </c>
      <c r="BI58" s="6">
        <v>0.878796260127729</v>
      </c>
      <c r="BJ58" s="6">
        <v>0.12607935828072</v>
      </c>
      <c r="BK58" s="6">
        <v>0.208689645987079</v>
      </c>
      <c r="BL58" s="6">
        <v>1.2764266308485</v>
      </c>
      <c r="BM58" s="6">
        <v>1.30933725050278</v>
      </c>
      <c r="BN58" s="6">
        <v>1.35797579640081</v>
      </c>
      <c r="BO58" s="6">
        <v>1.45171129222115</v>
      </c>
      <c r="BP58" s="6">
        <v>3.12296029087429</v>
      </c>
      <c r="BQ58" s="6">
        <v>1.05058808103411</v>
      </c>
      <c r="BR58" s="6">
        <v>0.541274569502889</v>
      </c>
      <c r="BS58" s="6">
        <v>2.03558388974551</v>
      </c>
      <c r="BT58" s="6">
        <v>0.451440497332158</v>
      </c>
      <c r="BU58" s="6">
        <v>-0.355557366615699</v>
      </c>
      <c r="BV58" s="6">
        <v>0.438691603746008</v>
      </c>
      <c r="BW58" s="6">
        <v>1.01474210280469</v>
      </c>
      <c r="BX58" s="6">
        <v>2.17761197456315</v>
      </c>
      <c r="BY58" s="6">
        <v>2.08144856560847</v>
      </c>
      <c r="BZ58" s="6">
        <v>2.07209065028962</v>
      </c>
      <c r="CA58" s="6">
        <v>2.44895445913414</v>
      </c>
      <c r="CB58" s="6">
        <v>2.74052045714478</v>
      </c>
      <c r="CC58" s="6">
        <v>1.45150185241084</v>
      </c>
      <c r="CD58" s="6">
        <v>2.36777878649752</v>
      </c>
      <c r="CE58" s="6">
        <v>0.489268132630627</v>
      </c>
      <c r="CF58" s="6">
        <v>1.40575138481347</v>
      </c>
      <c r="CG58" s="6">
        <v>0.381059544679772</v>
      </c>
      <c r="CH58" s="6">
        <v>0.214808706683868</v>
      </c>
      <c r="CI58" s="6">
        <v>2.07859480443238</v>
      </c>
      <c r="CJ58" s="6">
        <v>1.62877113505658</v>
      </c>
      <c r="CK58" s="6">
        <v>0.956746536412652</v>
      </c>
      <c r="CL58" s="6">
        <v>2.84028215652319</v>
      </c>
      <c r="CM58" s="6">
        <v>1.49814317228459</v>
      </c>
      <c r="CN58" s="6">
        <v>0.410439466245009</v>
      </c>
      <c r="CO58" s="6">
        <v>1.21490229197218</v>
      </c>
      <c r="CP58" s="6">
        <v>0.556583472325372</v>
      </c>
      <c r="CQ58" s="6">
        <v>1.46456486173571</v>
      </c>
      <c r="CR58" s="6">
        <v>-0.34479730448578</v>
      </c>
      <c r="CS58" s="6">
        <v>0.65844892575808</v>
      </c>
      <c r="CT58" s="6">
        <v>1.12020301752159</v>
      </c>
    </row>
    <row r="59" spans="2:98" ht="15" customHeight="true">
      <c r="B59" s="6">
        <v>93.5</v>
      </c>
      <c r="C59" s="6">
        <v>0.211112876405593</v>
      </c>
      <c r="D59" s="6">
        <v>-0.65544353906455</v>
      </c>
      <c r="E59" s="6">
        <v>0.938167381701192</v>
      </c>
      <c r="F59" s="6">
        <v>-0.569202136195031</v>
      </c>
      <c r="G59" s="6">
        <v>0.425269698797081</v>
      </c>
      <c r="H59" s="6">
        <v>0.794509514960339</v>
      </c>
      <c r="I59" s="6">
        <v>0.832816922754148</v>
      </c>
      <c r="J59" s="6">
        <v>0.205536553873287</v>
      </c>
      <c r="K59" s="6">
        <v>1.81459585037413</v>
      </c>
      <c r="L59" s="6">
        <v>0.942419237946126</v>
      </c>
      <c r="M59" s="6">
        <v>-0.050252813553584</v>
      </c>
      <c r="N59" s="6">
        <v>-0.0710037456874488</v>
      </c>
      <c r="O59" s="6">
        <v>0.471644678118821</v>
      </c>
      <c r="P59" s="6">
        <v>1.59446581988055</v>
      </c>
      <c r="Q59" s="6">
        <v>0.873669870205845</v>
      </c>
      <c r="R59" s="6">
        <v>0.780973736943338</v>
      </c>
      <c r="S59" s="6">
        <v>-1.07521169679461</v>
      </c>
      <c r="T59" s="6">
        <v>1.17101246713224</v>
      </c>
      <c r="U59" s="6">
        <v>0.7769368941739</v>
      </c>
      <c r="V59" s="6">
        <v>1.10331074128305</v>
      </c>
      <c r="W59" s="6">
        <v>-0.35726400400091</v>
      </c>
      <c r="X59" s="6">
        <v>0.961808426682069</v>
      </c>
      <c r="Y59" s="6">
        <v>1.19028739217129</v>
      </c>
      <c r="Z59" s="6">
        <v>1.29792861927683</v>
      </c>
      <c r="AA59" s="6">
        <v>2.04639901999354</v>
      </c>
      <c r="AB59" s="6">
        <v>1.88167477941272</v>
      </c>
      <c r="AC59" s="6">
        <v>1.56714205486065</v>
      </c>
      <c r="AD59" s="6">
        <v>0.989858682141005</v>
      </c>
      <c r="AE59" s="6">
        <v>1.27406269725566</v>
      </c>
      <c r="AF59" s="6">
        <v>1.08224653726353</v>
      </c>
      <c r="AG59" s="6">
        <v>2.12414160567363</v>
      </c>
      <c r="AH59" s="6">
        <v>2.14499198357197</v>
      </c>
      <c r="AI59" s="6">
        <v>1.74289067681173</v>
      </c>
      <c r="AJ59" s="6">
        <v>-0.668461139923068</v>
      </c>
      <c r="AK59" s="6">
        <v>0.902112692751757</v>
      </c>
      <c r="AL59" s="6">
        <v>-1.07620000177184</v>
      </c>
      <c r="AM59" s="6">
        <v>0.481875514539013</v>
      </c>
      <c r="AN59" s="6">
        <v>1.14139556972037</v>
      </c>
      <c r="AO59" s="6">
        <v>0.965569866970441</v>
      </c>
      <c r="AP59" s="6">
        <v>0.893626341334823</v>
      </c>
      <c r="AQ59" s="6">
        <v>1.5979469879552</v>
      </c>
      <c r="AR59" s="6">
        <v>0.338621281622522</v>
      </c>
      <c r="AS59" s="6">
        <v>0.613830504181294</v>
      </c>
      <c r="AT59" s="6">
        <v>1.28658421220769</v>
      </c>
      <c r="AU59" s="6">
        <v>0.367904906079559</v>
      </c>
      <c r="AV59" s="6">
        <v>-0.207244030606148</v>
      </c>
      <c r="AW59" s="6">
        <v>1.62053868050128</v>
      </c>
      <c r="AX59" s="6">
        <v>1.14184038176256</v>
      </c>
      <c r="AY59" s="6">
        <v>2.72504532264742</v>
      </c>
      <c r="AZ59" s="6">
        <v>1.11369839528186</v>
      </c>
      <c r="BA59" s="6">
        <v>-0.178909744480279</v>
      </c>
      <c r="BB59" s="6">
        <v>1.32163023269368</v>
      </c>
      <c r="BC59" s="6">
        <v>0.042135163723799</v>
      </c>
      <c r="BD59" s="6">
        <v>2.21726936935158</v>
      </c>
      <c r="BE59" s="6">
        <v>0.226269713952377</v>
      </c>
      <c r="BF59" s="6">
        <v>2.07727780077317</v>
      </c>
      <c r="BG59" s="6">
        <v>0.414988297117702</v>
      </c>
      <c r="BH59" s="6">
        <v>0.125310798271471</v>
      </c>
      <c r="BI59" s="6">
        <v>1.40717407000278</v>
      </c>
      <c r="BJ59" s="6">
        <v>-1.04155536762494</v>
      </c>
      <c r="BK59" s="6">
        <v>-0.59173899881705</v>
      </c>
      <c r="BL59" s="6">
        <v>1.98325092555808</v>
      </c>
      <c r="BM59" s="6">
        <v>1.6685819993271</v>
      </c>
      <c r="BN59" s="6">
        <v>1.37607936003531</v>
      </c>
      <c r="BO59" s="6">
        <v>2.05181656921292</v>
      </c>
      <c r="BP59" s="6">
        <v>3.4863350690203</v>
      </c>
      <c r="BQ59" s="6">
        <v>0.11376632388567</v>
      </c>
      <c r="BR59" s="6">
        <v>0.0654740074784286</v>
      </c>
      <c r="BS59" s="6">
        <v>1.46299996224178</v>
      </c>
      <c r="BT59" s="6">
        <v>-0.171659992732202</v>
      </c>
      <c r="BU59" s="6">
        <v>0.454511597337728</v>
      </c>
      <c r="BV59" s="6">
        <v>-0.303114504668997</v>
      </c>
      <c r="BW59" s="6">
        <v>0.115469544548489</v>
      </c>
      <c r="BX59" s="6">
        <v>2.32299691950686</v>
      </c>
      <c r="BY59" s="6">
        <v>1.16774105471364</v>
      </c>
      <c r="BZ59" s="6">
        <v>1.70803634188388</v>
      </c>
      <c r="CA59" s="6">
        <v>1.55242675588983</v>
      </c>
      <c r="CB59" s="6">
        <v>2.04696198225287</v>
      </c>
      <c r="CC59" s="6">
        <v>2.11179025722475</v>
      </c>
      <c r="CD59" s="6">
        <v>0.980869437488479</v>
      </c>
      <c r="CE59" s="6">
        <v>0.221929634006017</v>
      </c>
      <c r="CF59" s="6">
        <v>1.24320554343376</v>
      </c>
      <c r="CG59" s="6">
        <v>0.530283204717307</v>
      </c>
      <c r="CH59" s="6">
        <v>-0.00140801724290895</v>
      </c>
      <c r="CI59" s="6">
        <v>3.03058330025976</v>
      </c>
      <c r="CJ59" s="6">
        <v>2.0767390213893</v>
      </c>
      <c r="CK59" s="6">
        <v>0.721467119595332</v>
      </c>
      <c r="CL59" s="6">
        <v>3.10500178186345</v>
      </c>
      <c r="CM59" s="6">
        <v>0.267654349353563</v>
      </c>
      <c r="CN59" s="6">
        <v>-0.0863617102727972</v>
      </c>
      <c r="CO59" s="6">
        <v>1.60119803005131</v>
      </c>
      <c r="CP59" s="6">
        <v>-0.0336962523675766</v>
      </c>
      <c r="CQ59" s="6">
        <v>0.690930911604596</v>
      </c>
      <c r="CR59" s="6">
        <v>-0.845924998675116</v>
      </c>
      <c r="CS59" s="6">
        <v>-0.339592851580846</v>
      </c>
      <c r="CT59" s="6">
        <v>1.25377677509493</v>
      </c>
    </row>
    <row r="60" spans="2:98" ht="15" customHeight="true">
      <c r="B60" s="6">
        <v>94</v>
      </c>
      <c r="C60" s="6">
        <v>0.0839235305758166</v>
      </c>
      <c r="D60" s="6">
        <v>-1.14202640783276</v>
      </c>
      <c r="E60" s="6">
        <v>1.04201769306877</v>
      </c>
      <c r="F60" s="6">
        <v>-1.07915913785894</v>
      </c>
      <c r="G60" s="6">
        <v>0.44070511867892</v>
      </c>
      <c r="H60" s="6">
        <v>0.477668330980919</v>
      </c>
      <c r="I60" s="6">
        <v>0.561891828540013</v>
      </c>
      <c r="J60" s="6">
        <v>-0.0793024430485616</v>
      </c>
      <c r="K60" s="6">
        <v>2.39137287402309</v>
      </c>
      <c r="L60" s="6">
        <v>1.31694117567196</v>
      </c>
      <c r="M60" s="6">
        <v>0.0871119954535402</v>
      </c>
      <c r="N60" s="6">
        <v>-0.492102995846892</v>
      </c>
      <c r="O60" s="6">
        <v>-0.232255356230269</v>
      </c>
      <c r="P60" s="6">
        <v>1.37241038204758</v>
      </c>
      <c r="Q60" s="6">
        <v>0.539980958782564</v>
      </c>
      <c r="R60" s="6">
        <v>0.923215722836972</v>
      </c>
      <c r="S60" s="6">
        <v>-1.76190465346627</v>
      </c>
      <c r="T60" s="6">
        <v>0.971190887260093</v>
      </c>
      <c r="U60" s="6">
        <v>1.06826735946271</v>
      </c>
      <c r="V60" s="6">
        <v>1.01408803487215</v>
      </c>
      <c r="W60" s="6">
        <v>-0.944006635253516</v>
      </c>
      <c r="X60" s="6">
        <v>0.929894339141015</v>
      </c>
      <c r="Y60" s="6">
        <v>1.12923367343103</v>
      </c>
      <c r="Z60" s="6">
        <v>1.73094981805576</v>
      </c>
      <c r="AA60" s="6">
        <v>2.03396554764362</v>
      </c>
      <c r="AB60" s="6">
        <v>2.4014940468125</v>
      </c>
      <c r="AC60" s="6">
        <v>1.56489957725142</v>
      </c>
      <c r="AD60" s="6">
        <v>0.862699306896388</v>
      </c>
      <c r="AE60" s="6">
        <v>1.79948247309056</v>
      </c>
      <c r="AF60" s="6">
        <v>0.34534640702725</v>
      </c>
      <c r="AG60" s="6">
        <v>2.31551343884951</v>
      </c>
      <c r="AH60" s="6">
        <v>2.33040205854041</v>
      </c>
      <c r="AI60" s="6">
        <v>1.89641102766183</v>
      </c>
      <c r="AJ60" s="6">
        <v>-1.03278929056319</v>
      </c>
      <c r="AK60" s="6">
        <v>0.720363625125515</v>
      </c>
      <c r="AL60" s="6">
        <v>-1.88068133568584</v>
      </c>
      <c r="AM60" s="6">
        <v>0.304016075942684</v>
      </c>
      <c r="AN60" s="6">
        <v>0.64700703796774</v>
      </c>
      <c r="AO60" s="6">
        <v>1.09632380930037</v>
      </c>
      <c r="AP60" s="6">
        <v>0.274700995593548</v>
      </c>
      <c r="AQ60" s="6">
        <v>2.07655799386157</v>
      </c>
      <c r="AR60" s="6">
        <v>-0.375902248186662</v>
      </c>
      <c r="AS60" s="6">
        <v>0.113832759179104</v>
      </c>
      <c r="AT60" s="6">
        <v>0.826993967624958</v>
      </c>
      <c r="AU60" s="6">
        <v>0.483875583847464</v>
      </c>
      <c r="AV60" s="6">
        <v>-0.0452175570898135</v>
      </c>
      <c r="AW60" s="6">
        <v>1.63312806677658</v>
      </c>
      <c r="AX60" s="6">
        <v>0.499450367320321</v>
      </c>
      <c r="AY60" s="6">
        <v>2.83595011940849</v>
      </c>
      <c r="AZ60" s="6">
        <v>0.996142382712264</v>
      </c>
      <c r="BA60" s="6">
        <v>-1.07192423628936</v>
      </c>
      <c r="BB60" s="6">
        <v>1.25070649158192</v>
      </c>
      <c r="BC60" s="6">
        <v>-0.286863597254182</v>
      </c>
      <c r="BD60" s="6">
        <v>1.96993437504324</v>
      </c>
      <c r="BE60" s="6">
        <v>-0.126221990382533</v>
      </c>
      <c r="BF60" s="6">
        <v>2.46277682211587</v>
      </c>
      <c r="BG60" s="6">
        <v>0.237718197627771</v>
      </c>
      <c r="BH60" s="6">
        <v>0.578938414761069</v>
      </c>
      <c r="BI60" s="6">
        <v>1.77733914335033</v>
      </c>
      <c r="BJ60" s="6">
        <v>-2.04556472488991</v>
      </c>
      <c r="BK60" s="6">
        <v>-1.44894688734166</v>
      </c>
      <c r="BL60" s="6">
        <v>2.2527949523556</v>
      </c>
      <c r="BM60" s="6">
        <v>1.69644086181512</v>
      </c>
      <c r="BN60" s="6">
        <v>1.13333705050684</v>
      </c>
      <c r="BO60" s="6">
        <v>2.36109360250629</v>
      </c>
      <c r="BP60" s="6">
        <v>3.87304186299446</v>
      </c>
      <c r="BQ60" s="6">
        <v>-0.54856197077919</v>
      </c>
      <c r="BR60" s="6">
        <v>-0.195801806124166</v>
      </c>
      <c r="BS60" s="6">
        <v>1.23439661069858</v>
      </c>
      <c r="BT60" s="6">
        <v>-0.404529748585446</v>
      </c>
      <c r="BU60" s="6">
        <v>0.592834155833316</v>
      </c>
      <c r="BV60" s="6">
        <v>-0.570113960155652</v>
      </c>
      <c r="BW60" s="6">
        <v>0.0400745828328013</v>
      </c>
      <c r="BX60" s="6">
        <v>2.30619077281398</v>
      </c>
      <c r="BY60" s="6">
        <v>0.648714269491677</v>
      </c>
      <c r="BZ60" s="6">
        <v>1.6285258538133</v>
      </c>
      <c r="CA60" s="6">
        <v>1.45604786170696</v>
      </c>
      <c r="CB60" s="6">
        <v>1.77896384300016</v>
      </c>
      <c r="CC60" s="6">
        <v>2.30049782649218</v>
      </c>
      <c r="CD60" s="6">
        <v>0.045969185665399</v>
      </c>
      <c r="CE60" s="6">
        <v>-0.211187727549714</v>
      </c>
      <c r="CF60" s="6">
        <v>1.35814466035617</v>
      </c>
      <c r="CG60" s="6">
        <v>0.761529252012679</v>
      </c>
      <c r="CH60" s="6">
        <v>0.441417193012001</v>
      </c>
      <c r="CI60" s="6">
        <v>3.57213910164262</v>
      </c>
      <c r="CJ60" s="6">
        <v>2.23181407473334</v>
      </c>
      <c r="CK60" s="6">
        <v>0.690436660153523</v>
      </c>
      <c r="CL60" s="6">
        <v>3.07772265168239</v>
      </c>
      <c r="CM60" s="6">
        <v>0.170966960222188</v>
      </c>
      <c r="CN60" s="6">
        <v>-0.567790832327376</v>
      </c>
      <c r="CO60" s="6">
        <v>1.38915258413641</v>
      </c>
      <c r="CP60" s="6">
        <v>-0.435565582835693</v>
      </c>
      <c r="CQ60" s="6">
        <v>0.277558300719306</v>
      </c>
      <c r="CR60" s="6">
        <v>-1.09027985202653</v>
      </c>
      <c r="CS60" s="6">
        <v>-1.12321733633559</v>
      </c>
      <c r="CT60" s="6">
        <v>1.4634674540186</v>
      </c>
    </row>
    <row r="61" spans="2:98" ht="15" customHeight="true">
      <c r="B61" s="6">
        <v>94.5</v>
      </c>
      <c r="C61" s="6">
        <v>-0.494874339638386</v>
      </c>
      <c r="D61" s="6">
        <v>-1.72727030770591</v>
      </c>
      <c r="E61" s="6">
        <v>0.471926584908431</v>
      </c>
      <c r="F61" s="6">
        <v>-3.0647566988165</v>
      </c>
      <c r="G61" s="6">
        <v>-0.317359411462007</v>
      </c>
      <c r="H61" s="6">
        <v>-0.571802641563977</v>
      </c>
      <c r="I61" s="6">
        <v>0.724974784844619</v>
      </c>
      <c r="J61" s="6">
        <v>0.406886166739298</v>
      </c>
      <c r="K61" s="6">
        <v>4.45912797826577</v>
      </c>
      <c r="L61" s="6">
        <v>2.10905971917856</v>
      </c>
      <c r="M61" s="6">
        <v>0.662073917384475</v>
      </c>
      <c r="N61" s="6">
        <v>-1.70183180683858</v>
      </c>
      <c r="O61" s="6">
        <v>-1.47128300970684</v>
      </c>
      <c r="P61" s="6">
        <v>0.617376506346602</v>
      </c>
      <c r="Q61" s="6">
        <v>2.15708965075697</v>
      </c>
      <c r="R61" s="6">
        <v>2.54376581115173</v>
      </c>
      <c r="S61" s="6">
        <v>-2.26655867402388</v>
      </c>
      <c r="T61" s="6">
        <v>0.0997659604059322</v>
      </c>
      <c r="U61" s="6">
        <v>0.910586016861373</v>
      </c>
      <c r="V61" s="6">
        <v>3.99614668396083</v>
      </c>
      <c r="W61" s="6">
        <v>-2.37216022646129</v>
      </c>
      <c r="X61" s="6">
        <v>2.01267219933663</v>
      </c>
      <c r="Y61" s="6">
        <v>1.50010934513932</v>
      </c>
      <c r="Z61" s="6">
        <v>1.95300156076797</v>
      </c>
      <c r="AA61" s="6">
        <v>3.30150049467278</v>
      </c>
      <c r="AB61" s="6">
        <v>3.92283079176485</v>
      </c>
[truncated: 11,829 more chars]
