# Supplementary material for: PLA2G16 expression predicts prognosis and gemcitabine sensitivity in patients with pancreatic cancer
Source: PeerJ journal article supplement (doi:10.7717/peerj.19517), 2025-05-30
Supplement: FIG3B3I.zip [file admin_2023-08-31 11-19-35_CT052869 - Melt Curve Derivative Results.xlsx › xl/worksheets/sheet2.xml]

<?xml version="1.0"?>
<worksheet xmlns:xsi="http://www.w3.org/2001/XMLSchema-instance" xmlns:xsd="http://www.w3.org/2001/XMLSchema" xmlns="http://schemas.openxmlformats.org/spreadsheetml/2006/main">
  <sheetPr>
    <pageSetUpPr />
  </sheetPr>
  <dimension ref="A1:B13" />
  <sheetViews>
    <sheetView workbookViewId="0">
      <selection activeCell="A1" sqref="A1:A1" />
    </sheetView>
  </sheetViews>
  <sheetFormatPr defaultColWidth="10" defaultRowHeight="15" customHeight="true" />
  <cols>
    <col min="1" max="1" width="27" style="7" customWidth="true" />
    <col min="2" max="2" width="40" style="7" customWidth="true" />
    <col min="3" max="16384" width="10" style="7" customWidth="true" />
  </cols>
  <sheetData>
    <row r="1" spans="1:2" ht="15" customHeight="true">
      <c r="A1" s="7" t="s">
        <v>97</v>
      </c>
      <c r="B1" s="7" t="s">
        <v>98</v>
      </c>
    </row>
    <row r="2" spans="1:2" ht="15" customHeight="true">
      <c r="A2" s="7" t="s">
        <v>99</v>
      </c>
      <c r="B2" s="7" t="s">
        <v>100</v>
      </c>
    </row>
    <row r="3" spans="1:1" ht="15" customHeight="true">
      <c r="A3" s="7" t="s">
        <v>101</v>
      </c>
    </row>
    <row r="4" spans="1:1" ht="15" customHeight="true">
      <c r="A4" s="7" t="s">
        <v>102</v>
      </c>
    </row>
    <row r="5" spans="1:2" ht="15" customHeight="true">
      <c r="A5" s="7" t="s">
        <v>103</v>
      </c>
      <c r="B5" s="7" t="s">
        <v>104</v>
      </c>
    </row>
    <row r="6" spans="1:2" ht="15" customHeight="true">
      <c r="A6" s="7" t="s">
        <v>105</v>
      </c>
      <c r="B6" s="7" t="s">
        <v>106</v>
      </c>
    </row>
    <row r="7" spans="1:2" ht="15" customHeight="true">
      <c r="A7" s="7" t="s">
        <v>107</v>
      </c>
      <c r="B7" s="9">
        <v>10</v>
      </c>
    </row>
    <row r="8" spans="1:2" ht="15" customHeight="true">
      <c r="A8" s="7" t="s">
        <v>108</v>
      </c>
      <c r="B8" s="9">
        <v>105</v>
      </c>
    </row>
    <row r="9" spans="1:2" ht="15" customHeight="true">
      <c r="A9" s="7" t="s">
        <v>109</v>
      </c>
      <c r="B9" s="7" t="s">
        <v>110</v>
      </c>
    </row>
    <row r="10" spans="1:2" ht="15" customHeight="true">
      <c r="A10" s="7" t="s">
        <v>111</v>
      </c>
      <c r="B10" s="7" t="s">
        <v>112</v>
      </c>
    </row>
    <row r="11" spans="1:2" ht="15" customHeight="true">
      <c r="A11" s="7" t="s">
        <v>113</v>
      </c>
      <c r="B11" s="7" t="s">
        <v>114</v>
      </c>
    </row>
    <row r="12" spans="1:2" ht="15" customHeight="true">
      <c r="A12" s="7" t="s">
        <v>115</v>
      </c>
      <c r="B12" s="7" t="s">
        <v>116</v>
      </c>
    </row>
    <row r="13" spans="1:2" ht="15" customHeight="true">
      <c r="A13" s="7" t="s">
        <v>117</v>
      </c>
      <c r="B13" s="7" t="s">
        <v>118</v>
      </c>
    </row>
  </sheetData>
  <printOptions headings="true" gridLines="true" />
  <pageMargins left="0" right="0" top="0" bottom="0" header="0" footer="0" />
  <pageSetup paperSize="0" scale="0" pageOrder="overThenDown" orientation="portrait" blackAndWhite="true" useFirstPageNumber="true" />
  <headerFooter />
</worksheet>
