# Supplementary material for: PLA2G16 expression predicts prognosis and gemcitabine sensitivity in patients with pancreatic cancer
Source: PeerJ journal article supplement (doi:10.7717/peerj.19517), 2025-05-30
Supplement: FIG3B3I.zip [file admin_2023-08-31 11-19-35_CT052869 - Melt Curve Peak Results.xlsx › xl/sharedstrings.xml]

<?xml version="1.0"?>
<sst xmlns:xsi="http://www.w3.org/2001/XMLSchema-instance" xmlns:xsd="http://www.w3.org/2001/XMLSchema" xmlns="http://schemas.openxmlformats.org/spreadsheetml/2006/main">
  <si>
    <t>Well</t>
  </si>
  <si>
    <t>Fluor</t>
  </si>
  <si>
    <t>Target</t>
  </si>
  <si>
    <t>Content</t>
  </si>
  <si>
    <t>Sample</t>
  </si>
  <si>
    <t xml:space="preserve">Melt Temperature</t>
  </si>
  <si>
    <t xml:space="preserve">Peak Height</t>
  </si>
  <si>
    <t xml:space="preserve">Begin Temperature</t>
  </si>
  <si>
    <t xml:space="preserve">End Temperature</t>
  </si>
  <si>
    <t xml:space="preserve">Well Note</t>
  </si>
  <si>
    <t>A01</t>
  </si>
  <si>
    <t>SYBR</t>
  </si>
  <si>
    <t />
  </si>
  <si>
    <t>Unkn</t>
  </si>
  <si>
    <t>A02</t>
  </si>
  <si>
    <t>A03</t>
  </si>
  <si>
    <t>A04</t>
  </si>
  <si>
    <t>A05</t>
  </si>
  <si>
    <t>A06</t>
  </si>
  <si>
    <t>A07</t>
  </si>
  <si>
    <t>A08</t>
  </si>
  <si>
    <t>A09</t>
  </si>
  <si>
    <t>A10</t>
  </si>
  <si>
    <t>None</t>
  </si>
  <si>
    <t>A11</t>
  </si>
  <si>
    <t>A12</t>
  </si>
  <si>
    <t>B01</t>
  </si>
  <si>
    <t>B02</t>
  </si>
  <si>
    <t>B03</t>
  </si>
  <si>
    <t>B04</t>
  </si>
  <si>
    <t>B05</t>
  </si>
  <si>
    <t>B06</t>
  </si>
  <si>
    <t>B07</t>
  </si>
  <si>
    <t>B08</t>
  </si>
  <si>
    <t>B09</t>
  </si>
  <si>
    <t>B10</t>
  </si>
  <si>
    <t>B11</t>
  </si>
  <si>
    <t>B12</t>
  </si>
  <si>
    <t>C01</t>
  </si>
  <si>
    <t>C02</t>
  </si>
  <si>
    <t>C03</t>
  </si>
  <si>
    <t>C04</t>
  </si>
  <si>
    <t>C05</t>
  </si>
  <si>
    <t>C06</t>
  </si>
  <si>
    <t>C07</t>
  </si>
  <si>
    <t>C08</t>
  </si>
  <si>
    <t>C09</t>
  </si>
  <si>
    <t>C10</t>
  </si>
  <si>
    <t>C11</t>
  </si>
  <si>
    <t>C12</t>
  </si>
  <si>
    <t>D01</t>
  </si>
  <si>
    <t>D02</t>
  </si>
  <si>
    <t>D03</t>
  </si>
  <si>
    <t>D04</t>
  </si>
  <si>
    <t>D05</t>
  </si>
  <si>
    <t>D06</t>
  </si>
  <si>
    <t>D07</t>
  </si>
  <si>
    <t>D08</t>
  </si>
  <si>
    <t>D09</t>
  </si>
  <si>
    <t>D10</t>
  </si>
  <si>
    <t>D11</t>
  </si>
  <si>
    <t>D12</t>
  </si>
  <si>
    <t>E01</t>
  </si>
  <si>
    <t>E02</t>
  </si>
  <si>
    <t>E03</t>
  </si>
  <si>
    <t>E04</t>
  </si>
  <si>
    <t>E05</t>
  </si>
  <si>
    <t>E06</t>
  </si>
  <si>
    <t>E07</t>
  </si>
  <si>
    <t>E08</t>
  </si>
  <si>
    <t>E09</t>
  </si>
  <si>
    <t>E10</t>
  </si>
  <si>
    <t>E11</t>
  </si>
  <si>
    <t>E12</t>
  </si>
  <si>
    <t>F01</t>
  </si>
  <si>
    <t>F02</t>
  </si>
  <si>
    <t>F03</t>
  </si>
  <si>
    <t>F04</t>
  </si>
  <si>
    <t>F05</t>
  </si>
  <si>
    <t>F06</t>
  </si>
  <si>
    <t>F07</t>
  </si>
  <si>
    <t>F08</t>
  </si>
  <si>
    <t>F09</t>
  </si>
  <si>
    <t>F10</t>
  </si>
  <si>
    <t>F11</t>
  </si>
  <si>
    <t>F12</t>
  </si>
  <si>
    <t>G01</t>
  </si>
  <si>
    <t>G02</t>
  </si>
  <si>
    <t>G03</t>
  </si>
  <si>
    <t>G04</t>
  </si>
  <si>
    <t>G05</t>
  </si>
  <si>
    <t>G06</t>
  </si>
  <si>
    <t>G07</t>
  </si>
  <si>
    <t>G08</t>
  </si>
  <si>
    <t>G09</t>
  </si>
  <si>
    <t>G10</t>
  </si>
  <si>
    <t>G11</t>
  </si>
  <si>
    <t>G12</t>
  </si>
  <si>
    <t>H01</t>
  </si>
  <si>
    <t>H02</t>
  </si>
  <si>
    <t>H03</t>
  </si>
  <si>
    <t>H04</t>
  </si>
  <si>
    <t>H05</t>
  </si>
  <si>
    <t>H06</t>
  </si>
  <si>
    <t>H07</t>
  </si>
  <si>
    <t>H08</t>
  </si>
  <si>
    <t>H09</t>
  </si>
  <si>
    <t>H10</t>
  </si>
  <si>
    <t>H11</t>
  </si>
  <si>
    <t>H12</t>
  </si>
  <si>
    <t xml:space="preserve">File Name</t>
  </si>
  <si>
    <t xml:space="preserve">admin_2023-08-31 11-19-35_CT052869.pcrd</t>
  </si>
  <si>
    <t xml:space="preserve">Created By User</t>
  </si>
  <si>
    <t>admin</t>
  </si>
  <si>
    <t>Notes</t>
  </si>
  <si>
    <t>ID</t>
  </si>
  <si>
    <t xml:space="preserve">Run Started</t>
  </si>
  <si>
    <t xml:space="preserve">08/31/2023 03:19:43 UTC</t>
  </si>
  <si>
    <t xml:space="preserve">Run Ended</t>
  </si>
  <si>
    <t xml:space="preserve">08/31/2023 04:29:44 UTC</t>
  </si>
  <si>
    <t xml:space="preserve">Sample Vol</t>
  </si>
  <si>
    <t xml:space="preserve">Lid Temp</t>
  </si>
  <si>
    <t xml:space="preserve">Protocol File Name</t>
  </si>
  <si>
    <t xml:space="preserve">20220117 Q-PCR 模板.prcl</t>
  </si>
  <si>
    <t xml:space="preserve">Plate Setup File Name</t>
  </si>
  <si>
    <t xml:space="preserve">Quick Plate_96 wells_SYBR Only.pltd</t>
  </si>
  <si>
    <t xml:space="preserve">Base Serial Number</t>
  </si>
  <si>
    <t>CT052869</t>
  </si>
  <si>
    <t xml:space="preserve">Optical Head Serial Number</t>
  </si>
  <si>
    <t>785BR28537</t>
  </si>
  <si>
    <t xml:space="preserve">CFX Manager Version</t>
  </si>
  <si>
    <t xml:space="preserve">3.1.1517.0823. </t>
  </si>
</sst>
