# Supplementary material for: PLA2G16 expression predicts prognosis and gemcitabine sensitivity in patients with pancreatic cancer
Source: PeerJ journal article supplement (doi:10.7717/peerj.19517), 2025-05-30
Supplement: FIG3B3I.zip [file admin_2023-08-31 11-19-35_CT052869 - Melt Curve Plate View Results.xlsx › xl/sharedstrings.xml]

<?xml version="1.0"?>
<sst xmlns:xsi="http://www.w3.org/2001/XMLSchema-instance" xmlns:xsd="http://www.w3.org/2001/XMLSchema" xmlns="http://schemas.openxmlformats.org/spreadsheetml/2006/main">
  <si>
    <t>1</t>
  </si>
  <si>
    <t>2</t>
  </si>
  <si>
    <t>3</t>
  </si>
  <si>
    <t>4</t>
  </si>
  <si>
    <t>5</t>
  </si>
  <si>
    <t>6</t>
  </si>
  <si>
    <t>7</t>
  </si>
  <si>
    <t>8</t>
  </si>
  <si>
    <t>9</t>
  </si>
  <si>
    <t>10</t>
  </si>
  <si>
    <t>11</t>
  </si>
  <si>
    <t>12</t>
  </si>
  <si>
    <t>A</t>
  </si>
  <si>
    <t>Content</t>
  </si>
  <si>
    <t>Unkn</t>
  </si>
  <si>
    <t>Sample</t>
  </si>
  <si>
    <t xml:space="preserve">Peak 1</t>
  </si>
  <si>
    <t>None</t>
  </si>
  <si>
    <t xml:space="preserve">Peak 2</t>
  </si>
  <si>
    <t>B</t>
  </si>
  <si>
    <t>C</t>
  </si>
  <si>
    <t>D</t>
  </si>
  <si>
    <t>E</t>
  </si>
  <si>
    <t>F</t>
  </si>
  <si>
    <t>G</t>
  </si>
  <si>
    <t>H</t>
  </si>
  <si>
    <t xml:space="preserve">File Name</t>
  </si>
  <si>
    <t xml:space="preserve">admin_2023-08-31 11-19-35_CT052869.pcrd</t>
  </si>
  <si>
    <t xml:space="preserve">Created By User</t>
  </si>
  <si>
    <t>admin</t>
  </si>
  <si>
    <t>Notes</t>
  </si>
  <si>
    <t>ID</t>
  </si>
  <si>
    <t xml:space="preserve">Run Started</t>
  </si>
  <si>
    <t xml:space="preserve">08/31/2023 03:19:43 UTC</t>
  </si>
  <si>
    <t xml:space="preserve">Run Ended</t>
  </si>
  <si>
    <t xml:space="preserve">08/31/2023 04:29:44 UTC</t>
  </si>
  <si>
    <t xml:space="preserve">Sample Vol</t>
  </si>
  <si>
    <t xml:space="preserve">Lid Temp</t>
  </si>
  <si>
    <t xml:space="preserve">Protocol File Name</t>
  </si>
  <si>
    <t xml:space="preserve">20220117 Q-PCR 模板.prcl</t>
  </si>
  <si>
    <t xml:space="preserve">Plate Setup File Name</t>
  </si>
  <si>
    <t xml:space="preserve">Quick Plate_96 wells_SYBR Only.pltd</t>
  </si>
  <si>
    <t xml:space="preserve">Base Serial Number</t>
  </si>
  <si>
    <t>CT052869</t>
  </si>
  <si>
    <t xml:space="preserve">Optical Head Serial Number</t>
  </si>
  <si>
    <t>785BR28537</t>
  </si>
  <si>
    <t xml:space="preserve">CFX Manager Version</t>
  </si>
  <si>
    <t xml:space="preserve">3.1.1517.0823. </t>
  </si>
</sst>
