# Supplementary material for: PLA2G16 expression predicts prognosis and gemcitabine sensitivity in patients with pancreatic cancer
Source: PeerJ journal article supplement (doi:10.7717/peerj.19517), 2025-05-30
Supplement: FIG3B3I.zip [file admin_2023-08-31 11-19-35_CT052869 - Melt Curve Plate View Results.xlsx › xl/worksheets/sheet1.xml]

<?xml version="1.0"?>
<worksheet xmlns:xsi="http://www.w3.org/2001/XMLSchema-instance" xmlns:xsd="http://www.w3.org/2001/XMLSchema" xmlns="http://schemas.openxmlformats.org/spreadsheetml/2006/main">
  <sheetPr>
    <pageSetUpPr />
  </sheetPr>
  <dimension ref="A1:N33" />
  <sheetViews>
    <sheetView tabSelected="true" workbookViewId="0">
      <pane xSplit="2" ySplit="1" topLeftCell="C2" state="frozen" />
      <selection pane="bottomRight" activeCell="C2" sqref="C2:C2" />
      <selection pane="topRight" activeCell="C2" sqref="C2:C2" />
      <selection pane="bottomLeft" activeCell="C2" sqref="C2:C2" />
      <selection activeCell="C2" sqref="C2:C2" />
    </sheetView>
  </sheetViews>
  <sheetFormatPr defaultColWidth="10" defaultRowHeight="15" customHeight="true" />
  <cols>
    <col min="1" max="1" width="3.83" style="6" customWidth="true" />
    <col min="2" max="2" width="8.67" style="6" customWidth="true" />
    <col min="3" max="14" width="7.33" style="15" customWidth="true" />
    <col min="15" max="16384" width="10" style="1" customWidth="true" />
  </cols>
  <sheetData>
    <row r="1" spans="1:14" s="2" customFormat="true" ht="15" customHeight="true">
      <c r="A1" s="9" />
      <c r="B1" s="9" />
      <c r="C1" s="3" t="s">
        <v>0</v>
      </c>
      <c r="D1" s="3" t="s">
        <v>1</v>
      </c>
      <c r="E1" s="3" t="s">
        <v>2</v>
      </c>
      <c r="F1" s="3" t="s">
        <v>3</v>
      </c>
      <c r="G1" s="3" t="s">
        <v>4</v>
      </c>
      <c r="H1" s="3" t="s">
        <v>5</v>
      </c>
      <c r="I1" s="3" t="s">
        <v>6</v>
      </c>
      <c r="J1" s="3" t="s">
        <v>7</v>
      </c>
      <c r="K1" s="3" t="s">
        <v>8</v>
      </c>
      <c r="L1" s="3" t="s">
        <v>9</v>
      </c>
      <c r="M1" s="3" t="s">
        <v>10</v>
      </c>
      <c r="N1" s="3" t="s">
        <v>11</v>
      </c>
    </row>
    <row r="2" spans="1:14" s="4" customFormat="true" ht="15" customHeight="true">
      <c r="A2" s="5" t="s">
        <v>12</v>
      </c>
      <c r="B2" s="5" t="s">
        <v>13</v>
      </c>
      <c r="C2" s="11" t="s">
        <v>14</v>
      </c>
      <c r="D2" s="11" t="s">
        <v>14</v>
      </c>
      <c r="E2" s="11" t="s">
        <v>14</v>
      </c>
      <c r="F2" s="11" t="s">
        <v>14</v>
      </c>
      <c r="G2" s="11" t="s">
        <v>14</v>
      </c>
      <c r="H2" s="11" t="s">
        <v>14</v>
      </c>
      <c r="I2" s="11" t="s">
        <v>14</v>
      </c>
      <c r="J2" s="11" t="s">
        <v>14</v>
      </c>
      <c r="K2" s="11" t="s">
        <v>14</v>
      </c>
      <c r="L2" s="11" t="s">
        <v>14</v>
      </c>
      <c r="M2" s="11" t="s">
        <v>14</v>
      </c>
      <c r="N2" s="11" t="s">
        <v>14</v>
      </c>
    </row>
    <row r="3" spans="1:2" ht="15" customHeight="true">
      <c r="A3" s="6" t="s">
        <v>12</v>
      </c>
      <c r="B3" s="6" t="s">
        <v>15</v>
      </c>
    </row>
    <row r="4" spans="1:14" ht="15" customHeight="true">
      <c r="A4" s="6" t="s">
        <v>12</v>
      </c>
      <c r="B4" s="6" t="s">
        <v>16</v>
      </c>
      <c r="C4" s="12">
        <v>86</v>
      </c>
      <c r="D4" s="12">
        <v>86</v>
      </c>
      <c r="E4" s="12">
        <v>82.5</v>
      </c>
      <c r="F4" s="12">
        <v>82.5</v>
      </c>
      <c r="G4" s="12">
        <v>82.5</v>
      </c>
      <c r="H4" s="12">
        <v>82.5</v>
      </c>
      <c r="I4" s="12">
        <v>82.5</v>
      </c>
      <c r="J4" s="12">
        <v>82.5</v>
      </c>
      <c r="K4" s="12">
        <v>82.5</v>
      </c>
      <c r="L4" s="12" t="s">
        <v>17</v>
      </c>
      <c r="M4" s="12" t="s">
        <v>17</v>
      </c>
      <c r="N4" s="12" t="s">
        <v>17</v>
      </c>
    </row>
    <row r="5" spans="1:14" s="7" customFormat="true" ht="15" customHeight="true">
      <c r="A5" s="8" t="s">
        <v>12</v>
      </c>
      <c r="B5" s="8" t="s">
        <v>18</v>
      </c>
      <c r="C5" s="14">
        <v>82.5</v>
      </c>
      <c r="D5" s="14" t="s">
        <v>17</v>
      </c>
      <c r="E5" s="14" t="s">
        <v>17</v>
      </c>
      <c r="F5" s="14" t="s">
        <v>17</v>
      </c>
      <c r="G5" s="14" t="s">
        <v>17</v>
      </c>
      <c r="H5" s="14" t="s">
        <v>17</v>
      </c>
      <c r="I5" s="14" t="s">
        <v>17</v>
      </c>
      <c r="J5" s="14" t="s">
        <v>17</v>
      </c>
      <c r="K5" s="14" t="s">
        <v>17</v>
      </c>
      <c r="L5" s="14" t="s">
        <v>17</v>
      </c>
      <c r="M5" s="14" t="s">
        <v>17</v>
      </c>
      <c r="N5" s="14" t="s">
        <v>17</v>
      </c>
    </row>
    <row r="6" spans="1:14" s="4" customFormat="true" ht="15" customHeight="true">
      <c r="A6" s="5" t="s">
        <v>19</v>
      </c>
      <c r="B6" s="5" t="s">
        <v>13</v>
      </c>
      <c r="C6" s="11" t="s">
        <v>14</v>
      </c>
      <c r="D6" s="11" t="s">
        <v>14</v>
      </c>
      <c r="E6" s="11" t="s">
        <v>14</v>
      </c>
      <c r="F6" s="11" t="s">
        <v>14</v>
      </c>
      <c r="G6" s="11" t="s">
        <v>14</v>
      </c>
      <c r="H6" s="11" t="s">
        <v>14</v>
      </c>
      <c r="I6" s="11" t="s">
        <v>14</v>
      </c>
      <c r="J6" s="11" t="s">
        <v>14</v>
      </c>
      <c r="K6" s="11" t="s">
        <v>14</v>
      </c>
      <c r="L6" s="11" t="s">
        <v>14</v>
      </c>
      <c r="M6" s="11" t="s">
        <v>14</v>
      </c>
      <c r="N6" s="11" t="s">
        <v>14</v>
      </c>
    </row>
    <row r="7" spans="1:2" ht="15" customHeight="true">
      <c r="A7" s="6" t="s">
        <v>19</v>
      </c>
      <c r="B7" s="6" t="s">
        <v>15</v>
      </c>
    </row>
    <row r="8" spans="1:14" ht="15" customHeight="true">
      <c r="A8" s="6" t="s">
        <v>19</v>
      </c>
      <c r="B8" s="6" t="s">
        <v>16</v>
      </c>
      <c r="C8" s="12">
        <v>86.5</v>
      </c>
      <c r="D8" s="12">
        <v>86</v>
      </c>
      <c r="E8" s="12">
        <v>82.5</v>
      </c>
      <c r="F8" s="12">
        <v>82.5</v>
      </c>
      <c r="G8" s="12">
        <v>82.5</v>
      </c>
      <c r="H8" s="12">
        <v>82.5</v>
      </c>
      <c r="I8" s="12">
        <v>82.5</v>
      </c>
      <c r="J8" s="12">
        <v>82.5</v>
      </c>
      <c r="K8" s="12">
        <v>82.5</v>
      </c>
      <c r="L8" s="12" t="s">
        <v>17</v>
      </c>
      <c r="M8" s="12" t="s">
        <v>17</v>
      </c>
      <c r="N8" s="12" t="s">
        <v>17</v>
      </c>
    </row>
    <row r="9" spans="1:14" s="7" customFormat="true" ht="15" customHeight="true">
      <c r="A9" s="8" t="s">
        <v>19</v>
      </c>
      <c r="B9" s="8" t="s">
        <v>18</v>
      </c>
      <c r="C9" s="14" t="s">
        <v>17</v>
      </c>
      <c r="D9" s="14">
        <v>82.5</v>
      </c>
      <c r="E9" s="14" t="s">
        <v>17</v>
      </c>
      <c r="F9" s="14" t="s">
        <v>17</v>
      </c>
      <c r="G9" s="14" t="s">
        <v>17</v>
      </c>
      <c r="H9" s="14" t="s">
        <v>17</v>
      </c>
      <c r="I9" s="14" t="s">
        <v>17</v>
      </c>
      <c r="J9" s="14" t="s">
        <v>17</v>
      </c>
      <c r="K9" s="14" t="s">
        <v>17</v>
      </c>
      <c r="L9" s="14" t="s">
        <v>17</v>
      </c>
      <c r="M9" s="14" t="s">
        <v>17</v>
      </c>
      <c r="N9" s="14" t="s">
        <v>17</v>
      </c>
    </row>
    <row r="10" spans="1:14" s="4" customFormat="true" ht="15" customHeight="true">
      <c r="A10" s="5" t="s">
        <v>20</v>
      </c>
      <c r="B10" s="5" t="s">
        <v>13</v>
      </c>
      <c r="C10" s="11" t="s">
        <v>14</v>
      </c>
      <c r="D10" s="11" t="s">
        <v>14</v>
      </c>
      <c r="E10" s="11" t="s">
        <v>14</v>
      </c>
      <c r="F10" s="11" t="s">
        <v>14</v>
      </c>
      <c r="G10" s="11" t="s">
        <v>14</v>
      </c>
      <c r="H10" s="11" t="s">
        <v>14</v>
      </c>
      <c r="I10" s="11" t="s">
        <v>14</v>
      </c>
      <c r="J10" s="11" t="s">
        <v>14</v>
      </c>
      <c r="K10" s="11" t="s">
        <v>14</v>
      </c>
      <c r="L10" s="11" t="s">
        <v>14</v>
      </c>
      <c r="M10" s="11" t="s">
        <v>14</v>
      </c>
      <c r="N10" s="11" t="s">
        <v>14</v>
      </c>
    </row>
    <row r="11" spans="1:2" ht="15" customHeight="true">
      <c r="A11" s="6" t="s">
        <v>20</v>
      </c>
      <c r="B11" s="6" t="s">
        <v>15</v>
      </c>
    </row>
    <row r="12" spans="1:14" ht="15" customHeight="true">
      <c r="A12" s="6" t="s">
        <v>20</v>
      </c>
      <c r="B12" s="6" t="s">
        <v>16</v>
      </c>
      <c r="C12" s="12">
        <v>86.5</v>
      </c>
      <c r="D12" s="12">
        <v>86</v>
      </c>
      <c r="E12" s="12">
        <v>82.5</v>
      </c>
      <c r="F12" s="12">
        <v>82.5</v>
      </c>
      <c r="G12" s="12">
        <v>82.5</v>
      </c>
      <c r="H12" s="12">
        <v>82.5</v>
      </c>
      <c r="I12" s="12">
        <v>82.5</v>
      </c>
      <c r="J12" s="12">
        <v>82.5</v>
      </c>
      <c r="K12" s="12">
        <v>82.5</v>
      </c>
      <c r="L12" s="12" t="s">
        <v>17</v>
      </c>
      <c r="M12" s="12" t="s">
        <v>17</v>
      </c>
      <c r="N12" s="12" t="s">
        <v>17</v>
      </c>
    </row>
    <row r="13" spans="1:14" s="7" customFormat="true" ht="15" customHeight="true">
      <c r="A13" s="8" t="s">
        <v>20</v>
      </c>
      <c r="B13" s="8" t="s">
        <v>18</v>
      </c>
      <c r="C13" s="14">
        <v>82.5</v>
      </c>
      <c r="D13" s="14">
        <v>82.5</v>
      </c>
      <c r="E13" s="14" t="s">
        <v>17</v>
      </c>
      <c r="F13" s="14" t="s">
        <v>17</v>
      </c>
      <c r="G13" s="14" t="s">
        <v>17</v>
      </c>
      <c r="H13" s="14" t="s">
        <v>17</v>
      </c>
      <c r="I13" s="14" t="s">
        <v>17</v>
      </c>
      <c r="J13" s="14" t="s">
        <v>17</v>
      </c>
      <c r="K13" s="14" t="s">
        <v>17</v>
      </c>
      <c r="L13" s="14" t="s">
        <v>17</v>
      </c>
      <c r="M13" s="14" t="s">
        <v>17</v>
      </c>
      <c r="N13" s="14" t="s">
        <v>17</v>
      </c>
    </row>
    <row r="14" spans="1:14" s="4" customFormat="true" ht="15" customHeight="true">
      <c r="A14" s="5" t="s">
        <v>21</v>
      </c>
      <c r="B14" s="5" t="s">
        <v>13</v>
      </c>
      <c r="C14" s="11" t="s">
        <v>14</v>
      </c>
      <c r="D14" s="11" t="s">
        <v>14</v>
      </c>
      <c r="E14" s="11" t="s">
        <v>14</v>
      </c>
      <c r="F14" s="11" t="s">
        <v>14</v>
      </c>
      <c r="G14" s="11" t="s">
        <v>14</v>
      </c>
      <c r="H14" s="11" t="s">
        <v>14</v>
      </c>
      <c r="I14" s="11" t="s">
        <v>14</v>
      </c>
      <c r="J14" s="11" t="s">
        <v>14</v>
      </c>
      <c r="K14" s="11" t="s">
        <v>14</v>
      </c>
      <c r="L14" s="11" t="s">
        <v>14</v>
      </c>
      <c r="M14" s="11" t="s">
        <v>14</v>
      </c>
      <c r="N14" s="11" t="s">
        <v>14</v>
      </c>
    </row>
    <row r="15" spans="1:2" ht="15" customHeight="true">
      <c r="A15" s="6" t="s">
        <v>21</v>
      </c>
      <c r="B15" s="6" t="s">
        <v>15</v>
      </c>
    </row>
    <row r="16" spans="1:14" ht="15" customHeight="true">
      <c r="A16" s="6" t="s">
        <v>21</v>
      </c>
      <c r="B16" s="6" t="s">
        <v>16</v>
      </c>
      <c r="C16" s="12">
        <v>86.5</v>
      </c>
      <c r="D16" s="12">
        <v>86</v>
      </c>
      <c r="E16" s="12">
        <v>82.5</v>
      </c>
      <c r="F16" s="12">
        <v>82.5</v>
      </c>
      <c r="G16" s="12">
        <v>82.5</v>
      </c>
      <c r="H16" s="12">
        <v>82.5</v>
      </c>
      <c r="I16" s="12">
        <v>82.5</v>
      </c>
      <c r="J16" s="12">
        <v>82.5</v>
      </c>
      <c r="K16" s="12">
        <v>82.5</v>
      </c>
      <c r="L16" s="12" t="s">
        <v>17</v>
      </c>
      <c r="M16" s="12" t="s">
        <v>17</v>
      </c>
      <c r="N16" s="12" t="s">
        <v>17</v>
      </c>
    </row>
    <row r="17" spans="1:14" s="7" customFormat="true" ht="15" customHeight="true">
      <c r="A17" s="8" t="s">
        <v>21</v>
      </c>
      <c r="B17" s="8" t="s">
        <v>18</v>
      </c>
      <c r="C17" s="14" t="s">
        <v>17</v>
      </c>
      <c r="D17" s="14">
        <v>82.5</v>
      </c>
      <c r="E17" s="14" t="s">
        <v>17</v>
      </c>
      <c r="F17" s="14" t="s">
        <v>17</v>
      </c>
      <c r="G17" s="14" t="s">
        <v>17</v>
      </c>
      <c r="H17" s="14" t="s">
        <v>17</v>
      </c>
      <c r="I17" s="14" t="s">
        <v>17</v>
      </c>
      <c r="J17" s="14" t="s">
        <v>17</v>
      </c>
      <c r="K17" s="14" t="s">
        <v>17</v>
      </c>
      <c r="L17" s="14" t="s">
        <v>17</v>
      </c>
      <c r="M17" s="14" t="s">
        <v>17</v>
      </c>
      <c r="N17" s="14" t="s">
        <v>17</v>
      </c>
    </row>
    <row r="18" spans="1:14" s="4" customFormat="true" ht="15" customHeight="true">
      <c r="A18" s="5" t="s">
        <v>22</v>
      </c>
      <c r="B18" s="5" t="s">
        <v>13</v>
      </c>
      <c r="C18" s="11" t="s">
        <v>14</v>
      </c>
      <c r="D18" s="11" t="s">
        <v>14</v>
      </c>
      <c r="E18" s="11" t="s">
        <v>14</v>
      </c>
      <c r="F18" s="11" t="s">
        <v>14</v>
      </c>
      <c r="G18" s="11" t="s">
        <v>14</v>
      </c>
      <c r="H18" s="11" t="s">
        <v>14</v>
      </c>
      <c r="I18" s="11" t="s">
        <v>14</v>
      </c>
      <c r="J18" s="11" t="s">
        <v>14</v>
      </c>
      <c r="K18" s="11" t="s">
        <v>14</v>
      </c>
      <c r="L18" s="11" t="s">
        <v>14</v>
      </c>
      <c r="M18" s="11" t="s">
        <v>14</v>
      </c>
      <c r="N18" s="11" t="s">
        <v>14</v>
      </c>
    </row>
    <row r="19" spans="1:2" ht="15" customHeight="true">
      <c r="A19" s="6" t="s">
        <v>22</v>
      </c>
      <c r="B19" s="6" t="s">
        <v>15</v>
      </c>
    </row>
    <row r="20" spans="1:14" ht="15" customHeight="true">
      <c r="A20" s="6" t="s">
        <v>22</v>
      </c>
      <c r="B20" s="6" t="s">
        <v>16</v>
      </c>
      <c r="C20" s="12">
        <v>84.5</v>
      </c>
      <c r="D20" s="12">
        <v>84.5</v>
      </c>
      <c r="E20" s="12">
        <v>84.5</v>
      </c>
      <c r="F20" s="12">
        <v>84.5</v>
      </c>
      <c r="G20" s="12">
        <v>84.5</v>
      </c>
      <c r="H20" s="12">
        <v>84.5</v>
      </c>
      <c r="I20" s="12" t="s">
        <v>17</v>
      </c>
      <c r="J20" s="12" t="s">
        <v>17</v>
      </c>
      <c r="K20" s="12" t="s">
        <v>17</v>
      </c>
      <c r="L20" s="12" t="s">
        <v>17</v>
      </c>
      <c r="M20" s="12" t="s">
        <v>17</v>
      </c>
      <c r="N20" s="12" t="s">
        <v>17</v>
      </c>
    </row>
    <row r="21" spans="1:14" s="7" customFormat="true" ht="15" customHeight="true">
      <c r="A21" s="8" t="s">
        <v>22</v>
      </c>
      <c r="B21" s="8" t="s">
        <v>18</v>
      </c>
      <c r="C21" s="14" t="s">
        <v>17</v>
      </c>
      <c r="D21" s="14" t="s">
        <v>17</v>
      </c>
      <c r="E21" s="14" t="s">
        <v>17</v>
      </c>
      <c r="F21" s="14" t="s">
        <v>17</v>
      </c>
      <c r="G21" s="14" t="s">
        <v>17</v>
      </c>
      <c r="H21" s="14" t="s">
        <v>17</v>
      </c>
      <c r="I21" s="14" t="s">
        <v>17</v>
      </c>
      <c r="J21" s="14" t="s">
        <v>17</v>
      </c>
      <c r="K21" s="14" t="s">
        <v>17</v>
      </c>
      <c r="L21" s="14" t="s">
        <v>17</v>
      </c>
      <c r="M21" s="14" t="s">
        <v>17</v>
      </c>
      <c r="N21" s="14" t="s">
        <v>17</v>
      </c>
    </row>
    <row r="22" spans="1:14" s="4" customFormat="true" ht="15" customHeight="true">
      <c r="A22" s="5" t="s">
        <v>23</v>
      </c>
      <c r="B22" s="5" t="s">
        <v>13</v>
      </c>
      <c r="C22" s="11" t="s">
        <v>14</v>
      </c>
      <c r="D22" s="11" t="s">
        <v>14</v>
      </c>
      <c r="E22" s="11" t="s">
        <v>14</v>
      </c>
      <c r="F22" s="11" t="s">
        <v>14</v>
      </c>
      <c r="G22" s="11" t="s">
        <v>14</v>
      </c>
      <c r="H22" s="11" t="s">
        <v>14</v>
      </c>
      <c r="I22" s="11" t="s">
        <v>14</v>
      </c>
      <c r="J22" s="11" t="s">
        <v>14</v>
      </c>
      <c r="K22" s="11" t="s">
        <v>14</v>
      </c>
      <c r="L22" s="11" t="s">
        <v>14</v>
      </c>
      <c r="M22" s="11" t="s">
        <v>14</v>
      </c>
      <c r="N22" s="11" t="s">
        <v>14</v>
      </c>
    </row>
    <row r="23" spans="1:2" ht="15" customHeight="true">
      <c r="A23" s="6" t="s">
        <v>23</v>
      </c>
      <c r="B23" s="6" t="s">
        <v>15</v>
      </c>
    </row>
    <row r="24" spans="1:14" ht="15" customHeight="true">
      <c r="A24" s="6" t="s">
        <v>23</v>
      </c>
      <c r="B24" s="6" t="s">
        <v>16</v>
      </c>
      <c r="C24" s="12">
        <v>84.5</v>
      </c>
      <c r="D24" s="12">
        <v>84.5</v>
      </c>
      <c r="E24" s="12">
        <v>84.5</v>
      </c>
      <c r="F24" s="12">
        <v>84.5</v>
      </c>
      <c r="G24" s="12">
        <v>84.5</v>
      </c>
      <c r="H24" s="12">
        <v>84.5</v>
      </c>
      <c r="I24" s="12" t="s">
        <v>17</v>
      </c>
      <c r="J24" s="12" t="s">
        <v>17</v>
      </c>
      <c r="K24" s="12" t="s">
        <v>17</v>
      </c>
      <c r="L24" s="12" t="s">
        <v>17</v>
      </c>
      <c r="M24" s="12" t="s">
        <v>17</v>
      </c>
      <c r="N24" s="12" t="s">
        <v>17</v>
      </c>
    </row>
    <row r="25" spans="1:14" s="7" customFormat="true" ht="15" customHeight="true">
      <c r="A25" s="8" t="s">
        <v>23</v>
      </c>
      <c r="B25" s="8" t="s">
        <v>18</v>
      </c>
      <c r="C25" s="14" t="s">
        <v>17</v>
      </c>
      <c r="D25" s="14" t="s">
        <v>17</v>
      </c>
      <c r="E25" s="14" t="s">
        <v>17</v>
      </c>
      <c r="F25" s="14" t="s">
        <v>17</v>
      </c>
      <c r="G25" s="14" t="s">
        <v>17</v>
      </c>
      <c r="H25" s="14" t="s">
        <v>17</v>
      </c>
      <c r="I25" s="14" t="s">
        <v>17</v>
      </c>
      <c r="J25" s="14" t="s">
        <v>17</v>
      </c>
      <c r="K25" s="14" t="s">
        <v>17</v>
      </c>
      <c r="L25" s="14" t="s">
        <v>17</v>
      </c>
      <c r="M25" s="14" t="s">
        <v>17</v>
      </c>
      <c r="N25" s="14" t="s">
        <v>17</v>
      </c>
    </row>
    <row r="26" spans="1:14" s="4" customFormat="true" ht="15" customHeight="true">
      <c r="A26" s="5" t="s">
        <v>24</v>
      </c>
      <c r="B26" s="5" t="s">
        <v>13</v>
      </c>
      <c r="C26" s="11" t="s">
        <v>14</v>
      </c>
      <c r="D26" s="11" t="s">
        <v>14</v>
      </c>
      <c r="E26" s="11" t="s">
        <v>14</v>
      </c>
      <c r="F26" s="11" t="s">
        <v>14</v>
      </c>
      <c r="G26" s="11" t="s">
        <v>14</v>
      </c>
      <c r="H26" s="11" t="s">
        <v>14</v>
      </c>
      <c r="I26" s="11" t="s">
        <v>14</v>
      </c>
      <c r="J26" s="11" t="s">
        <v>14</v>
      </c>
      <c r="K26" s="11" t="s">
        <v>14</v>
      </c>
      <c r="L26" s="11" t="s">
        <v>14</v>
      </c>
      <c r="M26" s="11" t="s">
        <v>14</v>
      </c>
      <c r="N26" s="11" t="s">
        <v>14</v>
      </c>
    </row>
    <row r="27" spans="1:2" ht="15" customHeight="true">
      <c r="A27" s="6" t="s">
        <v>24</v>
      </c>
      <c r="B27" s="6" t="s">
        <v>15</v>
      </c>
    </row>
    <row r="28" spans="1:14" ht="15" customHeight="true">
      <c r="A28" s="6" t="s">
        <v>24</v>
      </c>
      <c r="B28" s="6" t="s">
        <v>16</v>
      </c>
      <c r="C28" s="12">
        <v>84.5</v>
      </c>
      <c r="D28" s="12">
        <v>84.5</v>
      </c>
      <c r="E28" s="12">
        <v>84.5</v>
      </c>
      <c r="F28" s="12">
        <v>84.5</v>
      </c>
      <c r="G28" s="12">
        <v>84.5</v>
      </c>
      <c r="H28" s="12">
        <v>84</v>
      </c>
      <c r="I28" s="12" t="s">
        <v>17</v>
      </c>
      <c r="J28" s="12" t="s">
        <v>17</v>
      </c>
      <c r="K28" s="12" t="s">
        <v>17</v>
      </c>
      <c r="L28" s="12" t="s">
        <v>17</v>
      </c>
      <c r="M28" s="12" t="s">
        <v>17</v>
      </c>
      <c r="N28" s="12" t="s">
        <v>17</v>
      </c>
    </row>
    <row r="29" spans="1:14" s="7" customFormat="true" ht="15" customHeight="true">
      <c r="A29" s="8" t="s">
        <v>24</v>
      </c>
      <c r="B29" s="8" t="s">
        <v>18</v>
      </c>
      <c r="C29" s="14" t="s">
        <v>17</v>
      </c>
      <c r="D29" s="14" t="s">
        <v>17</v>
      </c>
      <c r="E29" s="14" t="s">
        <v>17</v>
      </c>
      <c r="F29" s="14" t="s">
        <v>17</v>
      </c>
      <c r="G29" s="14" t="s">
        <v>17</v>
      </c>
      <c r="H29" s="14" t="s">
        <v>17</v>
      </c>
      <c r="I29" s="14" t="s">
        <v>17</v>
      </c>
      <c r="J29" s="14" t="s">
        <v>17</v>
      </c>
      <c r="K29" s="14" t="s">
        <v>17</v>
      </c>
      <c r="L29" s="14" t="s">
        <v>17</v>
      </c>
      <c r="M29" s="14" t="s">
        <v>17</v>
      </c>
      <c r="N29" s="14" t="s">
        <v>17</v>
      </c>
    </row>
    <row r="30" spans="1:14" s="4" customFormat="true" ht="15" customHeight="true">
      <c r="A30" s="5" t="s">
        <v>25</v>
      </c>
      <c r="B30" s="5" t="s">
        <v>13</v>
      </c>
      <c r="C30" s="11" t="s">
        <v>14</v>
      </c>
      <c r="D30" s="11" t="s">
        <v>14</v>
      </c>
      <c r="E30" s="11" t="s">
        <v>14</v>
      </c>
      <c r="F30" s="11" t="s">
        <v>14</v>
      </c>
      <c r="G30" s="11" t="s">
        <v>14</v>
      </c>
      <c r="H30" s="11" t="s">
        <v>14</v>
      </c>
      <c r="I30" s="11" t="s">
        <v>14</v>
      </c>
      <c r="J30" s="11" t="s">
        <v>14</v>
      </c>
      <c r="K30" s="11" t="s">
        <v>14</v>
      </c>
      <c r="L30" s="11" t="s">
        <v>14</v>
      </c>
      <c r="M30" s="11" t="s">
        <v>14</v>
      </c>
      <c r="N30" s="11" t="s">
        <v>14</v>
      </c>
    </row>
    <row r="31" spans="1:2" ht="15" customHeight="true">
      <c r="A31" s="6" t="s">
        <v>25</v>
      </c>
      <c r="B31" s="6" t="s">
        <v>15</v>
      </c>
    </row>
    <row r="32" spans="1:14" ht="15" customHeight="true">
      <c r="A32" s="6" t="s">
        <v>25</v>
      </c>
      <c r="B32" s="6" t="s">
        <v>16</v>
      </c>
      <c r="C32" s="12">
        <v>84.5</v>
      </c>
      <c r="D32" s="12">
        <v>84.5</v>
      </c>
      <c r="E32" s="12">
        <v>84.5</v>
      </c>
      <c r="F32" s="12">
        <v>84.5</v>
      </c>
      <c r="G32" s="12">
        <v>84.5</v>
      </c>
      <c r="H32" s="12" t="s">
        <v>17</v>
      </c>
      <c r="I32" s="12" t="s">
        <v>17</v>
      </c>
      <c r="J32" s="12" t="s">
        <v>17</v>
      </c>
      <c r="K32" s="12" t="s">
        <v>17</v>
      </c>
      <c r="L32" s="12" t="s">
        <v>17</v>
      </c>
      <c r="M32" s="12" t="s">
        <v>17</v>
      </c>
      <c r="N32" s="12" t="s">
        <v>17</v>
      </c>
    </row>
    <row r="33" spans="1:14" s="7" customFormat="true" ht="15" customHeight="true">
      <c r="A33" s="8" t="s">
        <v>25</v>
      </c>
      <c r="B33" s="8" t="s">
        <v>18</v>
      </c>
      <c r="C33" s="14" t="s">
        <v>17</v>
      </c>
      <c r="D33" s="14" t="s">
        <v>17</v>
      </c>
      <c r="E33" s="14" t="s">
        <v>17</v>
      </c>
      <c r="F33" s="14" t="s">
        <v>17</v>
      </c>
      <c r="G33" s="14" t="s">
        <v>17</v>
      </c>
      <c r="H33" s="14" t="s">
        <v>17</v>
      </c>
      <c r="I33" s="14" t="s">
        <v>17</v>
      </c>
      <c r="J33" s="14" t="s">
        <v>17</v>
      </c>
      <c r="K33" s="14" t="s">
        <v>17</v>
      </c>
      <c r="L33" s="14" t="s">
        <v>17</v>
      </c>
      <c r="M33" s="14" t="s">
        <v>17</v>
      </c>
      <c r="N33" s="14" t="s">
        <v>17</v>
      </c>
    </row>
  </sheetData>
  <mergeCells>
    <mergeCell ref="A2:A5" />
    <mergeCell ref="A6:A9" />
    <mergeCell ref="A10:A13" />
    <mergeCell ref="A14:A17" />
    <mergeCell ref="A18:A21" />
    <mergeCell ref="A22:A25" />
    <mergeCell ref="A26:A29" />
    <mergeCell ref="A30:A33" />
  </mergeCells>
  <printOptions headings="true" gridLines="true" />
  <pageMargins left="0" right="0" top="0" bottom="0" header="0" footer="0" />
  <pageSetup paperSize="0" scale="0" pageOrder="overThenDown" orientation="portrait" blackAndWhite="true" useFirstPageNumber="true" />
  <headerFooter />
</worksheet>
