# Supplementary material for: PLA2G16 expression predicts prognosis and gemcitabine sensitivity in patients with pancreatic cancer
Source: PeerJ journal article supplement (doi:10.7717/peerj.19517), 2025-05-30
Supplement: FIG3B3I.zip [file admin_2023-08-31 11-19-35_CT052869 - Melt Curve RFU Results.xlsx › xl/worksheets/sheet1.xml]

<?xml version="1.0"?>
<worksheet xmlns:xsi="http://www.w3.org/2001/XMLSchema-instance" xmlns:xsd="http://www.w3.org/2001/XMLSchema" xmlns="http://schemas.openxmlformats.org/spreadsheetml/2006/main">
  <sheetPr>
    <pageSetUpPr />
  </sheetPr>
  <dimension ref="A1:CT62" />
  <sheetViews>
    <sheetView tabSelected="true" workbookViewId="0">
      <pane xSplit="1" ySplit="1" topLeftCell="B2" state="frozen" />
      <selection pane="bottomRight" activeCell="B2" sqref="B2:B2" />
      <selection pane="topRight" activeCell="B2" sqref="B2:B2" />
      <selection pane="bottomLeft" activeCell="B2" sqref="B2:B2" />
      <selection activeCell="B2" sqref="B2:B2" />
    </sheetView>
  </sheetViews>
  <sheetFormatPr defaultColWidth="10" defaultRowHeight="15" customHeight="true" />
  <cols>
    <col min="1" max="1" width="1.5" style="4" customWidth="true" />
    <col min="2" max="2" width="12.5" style="6" customWidth="true" />
    <col min="3" max="98" width="8.33" style="6" customWidth="true" />
    <col min="99" max="16384" width="10" style="1" customWidth="true" />
  </cols>
  <sheetData>
    <row r="1" spans="1:98" s="2" customFormat="true" ht="15" customHeight="true">
      <c r="A1" s="5" />
      <c r="B1" s="3" t="s">
        <v>0</v>
      </c>
      <c r="C1" s="3" t="s">
        <v>1</v>
      </c>
      <c r="D1" s="3" t="s">
        <v>2</v>
      </c>
      <c r="E1" s="3" t="s">
        <v>3</v>
      </c>
      <c r="F1" s="3" t="s">
        <v>4</v>
      </c>
      <c r="G1" s="3" t="s">
        <v>5</v>
      </c>
      <c r="H1" s="3" t="s">
        <v>6</v>
      </c>
      <c r="I1" s="3" t="s">
        <v>7</v>
      </c>
      <c r="J1" s="3" t="s">
        <v>8</v>
      </c>
      <c r="K1" s="3" t="s">
        <v>9</v>
      </c>
      <c r="L1" s="3" t="s">
        <v>10</v>
      </c>
      <c r="M1" s="3" t="s">
        <v>11</v>
      </c>
      <c r="N1" s="3" t="s">
        <v>12</v>
      </c>
      <c r="O1" s="3" t="s">
        <v>13</v>
      </c>
      <c r="P1" s="3" t="s">
        <v>14</v>
      </c>
      <c r="Q1" s="3" t="s">
        <v>15</v>
      </c>
      <c r="R1" s="3" t="s">
        <v>16</v>
      </c>
      <c r="S1" s="3" t="s">
        <v>17</v>
      </c>
      <c r="T1" s="3" t="s">
        <v>18</v>
      </c>
      <c r="U1" s="3" t="s">
        <v>19</v>
      </c>
      <c r="V1" s="3" t="s">
        <v>20</v>
      </c>
      <c r="W1" s="3" t="s">
        <v>21</v>
      </c>
      <c r="X1" s="3" t="s">
        <v>22</v>
      </c>
      <c r="Y1" s="3" t="s">
        <v>23</v>
      </c>
      <c r="Z1" s="3" t="s">
        <v>24</v>
      </c>
      <c r="AA1" s="3" t="s">
        <v>25</v>
      </c>
      <c r="AB1" s="3" t="s">
        <v>26</v>
      </c>
      <c r="AC1" s="3" t="s">
        <v>27</v>
      </c>
      <c r="AD1" s="3" t="s">
        <v>28</v>
      </c>
      <c r="AE1" s="3" t="s">
        <v>29</v>
      </c>
      <c r="AF1" s="3" t="s">
        <v>30</v>
      </c>
      <c r="AG1" s="3" t="s">
        <v>31</v>
      </c>
      <c r="AH1" s="3" t="s">
        <v>32</v>
      </c>
      <c r="AI1" s="3" t="s">
        <v>33</v>
      </c>
      <c r="AJ1" s="3" t="s">
        <v>34</v>
      </c>
      <c r="AK1" s="3" t="s">
        <v>35</v>
      </c>
      <c r="AL1" s="3" t="s">
        <v>36</v>
      </c>
      <c r="AM1" s="3" t="s">
        <v>37</v>
      </c>
      <c r="AN1" s="3" t="s">
        <v>38</v>
      </c>
      <c r="AO1" s="3" t="s">
        <v>39</v>
      </c>
      <c r="AP1" s="3" t="s">
        <v>40</v>
      </c>
      <c r="AQ1" s="3" t="s">
        <v>41</v>
      </c>
      <c r="AR1" s="3" t="s">
        <v>42</v>
      </c>
      <c r="AS1" s="3" t="s">
        <v>43</v>
      </c>
      <c r="AT1" s="3" t="s">
        <v>44</v>
      </c>
      <c r="AU1" s="3" t="s">
        <v>45</v>
      </c>
      <c r="AV1" s="3" t="s">
        <v>46</v>
      </c>
      <c r="AW1" s="3" t="s">
        <v>47</v>
      </c>
      <c r="AX1" s="3" t="s">
        <v>48</v>
      </c>
      <c r="AY1" s="3" t="s">
        <v>49</v>
      </c>
      <c r="AZ1" s="3" t="s">
        <v>50</v>
      </c>
      <c r="BA1" s="3" t="s">
        <v>51</v>
      </c>
      <c r="BB1" s="3" t="s">
        <v>52</v>
      </c>
      <c r="BC1" s="3" t="s">
        <v>53</v>
      </c>
      <c r="BD1" s="3" t="s">
        <v>54</v>
      </c>
      <c r="BE1" s="3" t="s">
        <v>55</v>
      </c>
      <c r="BF1" s="3" t="s">
        <v>56</v>
      </c>
      <c r="BG1" s="3" t="s">
        <v>57</v>
      </c>
      <c r="BH1" s="3" t="s">
        <v>58</v>
      </c>
      <c r="BI1" s="3" t="s">
        <v>59</v>
      </c>
      <c r="BJ1" s="3" t="s">
        <v>60</v>
      </c>
      <c r="BK1" s="3" t="s">
        <v>61</v>
      </c>
      <c r="BL1" s="3" t="s">
        <v>62</v>
      </c>
      <c r="BM1" s="3" t="s">
        <v>63</v>
      </c>
      <c r="BN1" s="3" t="s">
        <v>64</v>
      </c>
      <c r="BO1" s="3" t="s">
        <v>65</v>
      </c>
      <c r="BP1" s="3" t="s">
        <v>66</v>
      </c>
      <c r="BQ1" s="3" t="s">
        <v>67</v>
      </c>
      <c r="BR1" s="3" t="s">
        <v>68</v>
      </c>
      <c r="BS1" s="3" t="s">
        <v>69</v>
      </c>
      <c r="BT1" s="3" t="s">
        <v>70</v>
      </c>
      <c r="BU1" s="3" t="s">
        <v>71</v>
      </c>
      <c r="BV1" s="3" t="s">
        <v>72</v>
      </c>
      <c r="BW1" s="3" t="s">
        <v>73</v>
      </c>
      <c r="BX1" s="3" t="s">
        <v>74</v>
      </c>
      <c r="BY1" s="3" t="s">
        <v>75</v>
      </c>
      <c r="BZ1" s="3" t="s">
        <v>76</v>
      </c>
      <c r="CA1" s="3" t="s">
        <v>77</v>
      </c>
      <c r="CB1" s="3" t="s">
        <v>78</v>
      </c>
      <c r="CC1" s="3" t="s">
        <v>79</v>
      </c>
      <c r="CD1" s="3" t="s">
        <v>80</v>
      </c>
      <c r="CE1" s="3" t="s">
        <v>81</v>
      </c>
      <c r="CF1" s="3" t="s">
        <v>82</v>
      </c>
      <c r="CG1" s="3" t="s">
        <v>83</v>
      </c>
      <c r="CH1" s="3" t="s">
        <v>84</v>
      </c>
      <c r="CI1" s="3" t="s">
        <v>85</v>
      </c>
      <c r="CJ1" s="3" t="s">
        <v>86</v>
      </c>
      <c r="CK1" s="3" t="s">
        <v>87</v>
      </c>
      <c r="CL1" s="3" t="s">
        <v>88</v>
      </c>
      <c r="CM1" s="3" t="s">
        <v>89</v>
      </c>
      <c r="CN1" s="3" t="s">
        <v>90</v>
      </c>
      <c r="CO1" s="3" t="s">
        <v>91</v>
      </c>
      <c r="CP1" s="3" t="s">
        <v>92</v>
      </c>
      <c r="CQ1" s="3" t="s">
        <v>93</v>
      </c>
      <c r="CR1" s="3" t="s">
        <v>94</v>
      </c>
      <c r="CS1" s="3" t="s">
        <v>95</v>
      </c>
      <c r="CT1" s="3" t="s">
        <v>96</v>
      </c>
    </row>
    <row r="2" spans="2:98" ht="15" customHeight="true">
      <c r="B2" s="6">
        <v>65</v>
      </c>
      <c r="C2" s="6">
        <v>3573.86790698494</v>
      </c>
      <c r="D2" s="6">
        <v>3487.35438345566</v>
      </c>
      <c r="E2" s="6">
        <v>3713.05916021736</v>
      </c>
      <c r="F2" s="6">
        <v>3630.14649872175</v>
      </c>
      <c r="G2" s="6">
        <v>3593.10970898668</v>
      </c>
      <c r="H2" s="6">
        <v>3709.13417942658</v>
      </c>
      <c r="I2" s="6">
        <v>3609.30911343143</v>
      </c>
      <c r="J2" s="6">
        <v>3623.22306839628</v>
      </c>
      <c r="K2" s="6">
        <v>3605.8602191464</v>
      </c>
      <c r="L2" s="6">
        <v>2252.45174147442</v>
      </c>
      <c r="M2" s="6">
        <v>2196.90181444521</v>
      </c>
      <c r="N2" s="6">
        <v>2204.39027261799</v>
      </c>
      <c r="O2" s="6">
        <v>3458.04527634757</v>
      </c>
      <c r="P2" s="6">
        <v>3677.96870008279</v>
      </c>
      <c r="Q2" s="6">
        <v>3628.20839788309</v>
      </c>
      <c r="R2" s="6">
        <v>3657.52120561194</v>
      </c>
      <c r="S2" s="6">
        <v>3619.74367291084</v>
      </c>
      <c r="T2" s="6">
        <v>3633.62209973209</v>
      </c>
      <c r="U2" s="6">
        <v>3650.76484919643</v>
      </c>
      <c r="V2" s="6">
        <v>3619.32301496303</v>
      </c>
      <c r="W2" s="6">
        <v>3598.90638373071</v>
      </c>
      <c r="X2" s="6">
        <v>2208.1372800985</v>
      </c>
      <c r="Y2" s="6">
        <v>2215.23353597007</v>
      </c>
      <c r="Z2" s="6">
        <v>2182.00092707576</v>
      </c>
      <c r="AA2" s="6">
        <v>3684.81531050865</v>
      </c>
      <c r="AB2" s="6">
        <v>3802.52340360649</v>
      </c>
      <c r="AC2" s="6">
        <v>3814.80544675365</v>
      </c>
      <c r="AD2" s="6">
        <v>3780.25465484717</v>
      </c>
      <c r="AE2" s="6">
        <v>3807.89202481807</v>
      </c>
      <c r="AF2" s="6">
        <v>3894.78337977424</v>
      </c>
      <c r="AG2" s="6">
        <v>3840.59686389358</v>
      </c>
      <c r="AH2" s="6">
        <v>3793.45281604259</v>
      </c>
      <c r="AI2" s="6">
        <v>3663.10326435016</v>
      </c>
      <c r="AJ2" s="6">
        <v>2211.04647128644</v>
      </c>
      <c r="AK2" s="6">
        <v>2223.70080018501</v>
      </c>
      <c r="AL2" s="6">
        <v>2217.28831091989</v>
      </c>
      <c r="AM2" s="6">
        <v>3498.96183085935</v>
      </c>
      <c r="AN2" s="6">
        <v>3657.95521183912</v>
      </c>
      <c r="AO2" s="6">
        <v>3681.06398952659</v>
      </c>
      <c r="AP2" s="6">
        <v>3779.94010105674</v>
      </c>
      <c r="AQ2" s="6">
        <v>3633.29037472066</v>
      </c>
      <c r="AR2" s="6">
        <v>3726.72082422841</v>
      </c>
      <c r="AS2" s="6">
        <v>3732.65867003885</v>
      </c>
      <c r="AT2" s="6">
        <v>3772.10535472908</v>
      </c>
      <c r="AU2" s="6">
        <v>3619.77588536137</v>
      </c>
      <c r="AV2" s="6">
        <v>2203.71205619904</v>
      </c>
      <c r="AW2" s="6">
        <v>2194.94533939922</v>
      </c>
      <c r="AX2" s="6">
        <v>2233.65727385212</v>
      </c>
      <c r="AY2" s="6">
        <v>3705.3832140531</v>
      </c>
      <c r="AZ2" s="6">
        <v>3713.25206215892</v>
      </c>
      <c r="BA2" s="6">
        <v>3687.55884939332</v>
      </c>
      <c r="BB2" s="6">
        <v>3723.44237083826</v>
      </c>
      <c r="BC2" s="6">
        <v>3645.89213678762</v>
      </c>
      <c r="BD2" s="6">
        <v>3627.95472499457</v>
      </c>
      <c r="BE2" s="6">
        <v>2723.53494628389</v>
      </c>
      <c r="BF2" s="6">
        <v>2787.04589076387</v>
      </c>
      <c r="BG2" s="6">
        <v>2262.2701589722</v>
      </c>
      <c r="BH2" s="6">
        <v>2188.62448774166</v>
      </c>
      <c r="BI2" s="6">
        <v>2200.75489286973</v>
      </c>
      <c r="BJ2" s="6">
        <v>2216.70150329642</v>
      </c>
      <c r="BK2" s="6">
        <v>3549.43997450148</v>
      </c>
      <c r="BL2" s="6">
        <v>3584.18040778639</v>
      </c>
      <c r="BM2" s="6">
        <v>3519.57764437735</v>
      </c>
      <c r="BN2" s="6">
        <v>3538.38569687691</v>
      </c>
      <c r="BO2" s="6">
        <v>3413.41527160608</v>
      </c>
      <c r="BP2" s="6">
        <v>3489.85980732705</v>
      </c>
      <c r="BQ2" s="6">
        <v>2385.43240196952</v>
      </c>
      <c r="BR2" s="6">
        <v>2252.7437912665</v>
      </c>
      <c r="BS2" s="6">
        <v>2728.0472350327</v>
      </c>
      <c r="BT2" s="6">
        <v>2197.7504994445</v>
      </c>
      <c r="BU2" s="6">
        <v>2212.01691160908</v>
      </c>
      <c r="BV2" s="6">
        <v>2204.06924323906</v>
      </c>
      <c r="BW2" s="6">
        <v>3677.94878871486</v>
      </c>
      <c r="BX2" s="6">
        <v>3733.56253878554</v>
      </c>
      <c r="BY2" s="6">
        <v>3630.73376607806</v>
      </c>
      <c r="BZ2" s="6">
        <v>3660.96826191285</v>
      </c>
      <c r="CA2" s="6">
        <v>3561.8729309046</v>
      </c>
      <c r="CB2" s="6">
        <v>3618.22736657269</v>
      </c>
      <c r="CC2" s="6">
        <v>2264.25149663213</v>
      </c>
      <c r="CD2" s="6">
        <v>2266.67382399011</v>
      </c>
      <c r="CE2" s="6">
        <v>2674.98726747655</v>
      </c>
      <c r="CF2" s="6">
        <v>2204.7542886157</v>
      </c>
      <c r="CG2" s="6">
        <v>2196.34132695188</v>
      </c>
      <c r="CH2" s="6">
        <v>2184.86918327809</v>
      </c>
      <c r="CI2" s="6">
        <v>3463.16194746461</v>
      </c>
      <c r="CJ2" s="6">
        <v>3577.98177493482</v>
      </c>
      <c r="CK2" s="6">
        <v>3386.1600927839</v>
      </c>
      <c r="CL2" s="6">
        <v>3499.39434825442</v>
      </c>
      <c r="CM2" s="6">
        <v>3455.88566165584</v>
      </c>
      <c r="CN2" s="6">
        <v>3148.96327817376</v>
      </c>
      <c r="CO2" s="6">
        <v>2235.11735527184</v>
      </c>
      <c r="CP2" s="6">
        <v>2532.17018681583</v>
      </c>
      <c r="CQ2" s="6">
        <v>2407.71642372247</v>
      </c>
      <c r="CR2" s="6">
        <v>2178.45396908377</v>
      </c>
      <c r="CS2" s="6">
        <v>2201.16524276015</v>
      </c>
      <c r="CT2" s="6">
        <v>2200.65202265631</v>
      </c>
    </row>
    <row r="3" spans="2:98" ht="15" customHeight="true">
      <c r="B3" s="6">
        <v>65.5</v>
      </c>
      <c r="C3" s="6">
        <v>3579.6183334396</v>
      </c>
      <c r="D3" s="6">
        <v>3490.46213500485</v>
      </c>
      <c r="E3" s="6">
        <v>3715.59382473115</v>
      </c>
      <c r="F3" s="6">
        <v>3631.28100430105</v>
      </c>
      <c r="G3" s="6">
        <v>3599.4741302391</v>
      </c>
      <c r="H3" s="6">
        <v>3712.83664624078</v>
      </c>
      <c r="I3" s="6">
        <v>3612.30416088195</v>
      </c>
      <c r="J3" s="6">
        <v>3629.28982695272</v>
      </c>
      <c r="K3" s="6">
        <v>3611.02650721472</v>
      </c>
      <c r="L3" s="6">
        <v>2251.56682818459</v>
      </c>
      <c r="M3" s="6">
        <v>2196.35826136808</v>
      </c>
      <c r="N3" s="6">
        <v>2204.06826457322</v>
      </c>
      <c r="O3" s="6">
        <v>3461.66188452168</v>
      </c>
      <c r="P3" s="6">
        <v>3681.91784111102</v>
      </c>
      <c r="Q3" s="6">
        <v>3632.16669991804</v>
      </c>
      <c r="R3" s="6">
        <v>3659.10716372059</v>
      </c>
      <c r="S3" s="6">
        <v>3621.67414244362</v>
      </c>
      <c r="T3" s="6">
        <v>3636.33932796748</v>
      </c>
      <c r="U3" s="6">
        <v>3652.90581924929</v>
      </c>
      <c r="V3" s="6">
        <v>3619.68411236128</v>
      </c>
      <c r="W3" s="6">
        <v>3603.13177249494</v>
      </c>
      <c r="X3" s="6">
        <v>2207.72018537086</v>
      </c>
      <c r="Y3" s="6">
        <v>2214.25037918465</v>
      </c>
      <c r="Z3" s="6">
        <v>2181.94086646523</v>
      </c>
      <c r="AA3" s="6">
        <v>3689.08357334709</v>
      </c>
      <c r="AB3" s="6">
        <v>3809.07619696263</v>
      </c>
      <c r="AC3" s="6">
        <v>3820.04167769339</v>
      </c>
      <c r="AD3" s="6">
        <v>3783.68614067431</v>
      </c>
      <c r="AE3" s="6">
        <v>3813.10083964369</v>
      </c>
      <c r="AF3" s="6">
        <v>3899.3769234529</v>
      </c>
      <c r="AG3" s="6">
        <v>3849.03558156578</v>
      </c>
      <c r="AH3" s="6">
        <v>3796.1522583093</v>
      </c>
      <c r="AI3" s="6">
        <v>3666.73730072821</v>
      </c>
      <c r="AJ3" s="6">
        <v>2210.36702233114</v>
      </c>
      <c r="AK3" s="6">
        <v>2223.48718136027</v>
      </c>
      <c r="AL3" s="6">
        <v>2217.11800483777</v>
      </c>
      <c r="AM3" s="6">
        <v>3504.0688026137</v>
      </c>
      <c r="AN3" s="6">
        <v>3663.96312970641</v>
      </c>
      <c r="AO3" s="6">
        <v>3681.2652651173</v>
      </c>
      <c r="AP3" s="6">
        <v>3782.76914628235</v>
      </c>
      <c r="AQ3" s="6">
        <v>3637.93654819748</v>
      </c>
      <c r="AR3" s="6">
        <v>3725.26518838715</v>
      </c>
      <c r="AS3" s="6">
        <v>3735.38000394253</v>
      </c>
      <c r="AT3" s="6">
        <v>3775.68365911997</v>
      </c>
      <c r="AU3" s="6">
        <v>3621.31760946411</v>
      </c>
      <c r="AV3" s="6">
        <v>2203.17759829406</v>
      </c>
      <c r="AW3" s="6">
        <v>2194.21526246067</v>
      </c>
      <c r="AX3" s="6">
        <v>2233.0111299624</v>
      </c>
      <c r="AY3" s="6">
        <v>3704.34943059679</v>
      </c>
      <c r="AZ3" s="6">
        <v>3712.73261079693</v>
      </c>
      <c r="BA3" s="6">
        <v>3686.84121649924</v>
      </c>
      <c r="BB3" s="6">
        <v>3722.49425556481</v>
      </c>
      <c r="BC3" s="6">
        <v>3643.59714108983</v>
      </c>
      <c r="BD3" s="6">
        <v>3628.43209955887</v>
      </c>
      <c r="BE3" s="6">
        <v>2720.73257272097</v>
      </c>
      <c r="BF3" s="6">
        <v>2782.25633119285</v>
      </c>
      <c r="BG3" s="6">
        <v>2261.56168311006</v>
      </c>
      <c r="BH3" s="6">
        <v>2187.83215598989</v>
      </c>
      <c r="BI3" s="6">
        <v>2200.79799619793</v>
      </c>
      <c r="BJ3" s="6">
        <v>2216.15195324848</v>
      </c>
      <c r="BK3" s="6">
        <v>3547.45613289952</v>
      </c>
      <c r="BL3" s="6">
        <v>3583.73141143321</v>
      </c>
      <c r="BM3" s="6">
        <v>3518.43419845524</v>
      </c>
      <c r="BN3" s="6">
        <v>3535.9048368119</v>
      </c>
      <c r="BO3" s="6">
        <v>3411.87282110924</v>
      </c>
      <c r="BP3" s="6">
        <v>3486.27842061016</v>
      </c>
      <c r="BQ3" s="6">
        <v>2382.90483628054</v>
      </c>
      <c r="BR3" s="6">
        <v>2252.56938134331</v>
      </c>
      <c r="BS3" s="6">
        <v>2723.06321217439</v>
      </c>
      <c r="BT3" s="6">
        <v>2197.20215127085</v>
      </c>
      <c r="BU3" s="6">
        <v>2211.72866787436</v>
      </c>
      <c r="BV3" s="6">
        <v>2203.56210713606</v>
      </c>
      <c r="BW3" s="6">
        <v>3676.66474673673</v>
      </c>
      <c r="BX3" s="6">
        <v>3730.53273973964</v>
      </c>
      <c r="BY3" s="6">
        <v>3630.66361139167</v>
      </c>
      <c r="BZ3" s="6">
        <v>3661.52889728941</v>
      </c>
      <c r="CA3" s="6">
        <v>3561.47804180599</v>
      </c>
      <c r="CB3" s="6">
        <v>3617.91411289103</v>
      </c>
      <c r="CC3" s="6">
        <v>2264.68868480251</v>
      </c>
      <c r="CD3" s="6">
        <v>2266.33272074042</v>
      </c>
      <c r="CE3" s="6">
        <v>2670.96900192019</v>
      </c>
      <c r="CF3" s="6">
        <v>2204.01901326034</v>
      </c>
      <c r="CG3" s="6">
        <v>2195.82721472114</v>
      </c>
      <c r="CH3" s="6">
        <v>2184.4178832505</v>
      </c>
      <c r="CI3" s="6">
        <v>3461.34869057795</v>
      </c>
      <c r="CJ3" s="6">
        <v>3577.70346643379</v>
      </c>
      <c r="CK3" s="6">
        <v>3385.1960907735</v>
      </c>
      <c r="CL3" s="6">
        <v>3495.85472897056</v>
      </c>
      <c r="CM3" s="6">
        <v>3451.58197315754</v>
      </c>
      <c r="CN3" s="6">
        <v>3128.65857488771</v>
      </c>
      <c r="CO3" s="6">
        <v>2235.67521958576</v>
      </c>
      <c r="CP3" s="6">
        <v>2529.60146094195</v>
      </c>
      <c r="CQ3" s="6">
        <v>2406.2986724583</v>
      </c>
      <c r="CR3" s="6">
        <v>2178.23669790061</v>
      </c>
      <c r="CS3" s="6">
        <v>2200.20514064138</v>
      </c>
      <c r="CT3" s="6">
        <v>2199.79370210404</v>
      </c>
    </row>
    <row r="4" spans="2:98" ht="15" customHeight="true">
      <c r="B4" s="6">
        <v>66</v>
      </c>
      <c r="C4" s="6">
        <v>3585.36875989427</v>
      </c>
      <c r="D4" s="6">
        <v>3493.56988655404</v>
      </c>
      <c r="E4" s="6">
        <v>3718.12848924495</v>
      </c>
      <c r="F4" s="6">
        <v>3632.41550988035</v>
      </c>
      <c r="G4" s="6">
        <v>3605.83855149152</v>
      </c>
      <c r="H4" s="6">
        <v>3716.53911305499</v>
      </c>
      <c r="I4" s="6">
        <v>3615.29920833248</v>
      </c>
      <c r="J4" s="6">
        <v>3635.35658550915</v>
      </c>
      <c r="K4" s="6">
        <v>3616.19279528305</v>
      </c>
      <c r="L4" s="6">
        <v>2250.68191489476</v>
      </c>
      <c r="M4" s="6">
        <v>2195.81470829094</v>
      </c>
      <c r="N4" s="6">
        <v>2203.74625652844</v>
      </c>
      <c r="O4" s="6">
        <v>3465.27849269578</v>
      </c>
      <c r="P4" s="6">
        <v>3685.86698213926</v>
      </c>
      <c r="Q4" s="6">
        <v>3636.12500195298</v>
      </c>
      <c r="R4" s="6">
        <v>3660.69312182924</v>
      </c>
      <c r="S4" s="6">
        <v>3623.60461197639</v>
      </c>
      <c r="T4" s="6">
        <v>3639.05655620288</v>
      </c>
      <c r="U4" s="6">
        <v>3655.04678930214</v>
      </c>
      <c r="V4" s="6">
        <v>3620.04520975952</v>
      </c>
      <c r="W4" s="6">
        <v>3607.35716125916</v>
      </c>
      <c r="X4" s="6">
        <v>2207.30309064322</v>
      </c>
      <c r="Y4" s="6">
        <v>2213.26722239923</v>
      </c>
      <c r="Z4" s="6">
        <v>2181.88080585471</v>
      </c>
      <c r="AA4" s="6">
        <v>3693.35183618553</v>
      </c>
      <c r="AB4" s="6">
        <v>3815.62899031877</v>
      </c>
      <c r="AC4" s="6">
        <v>3825.27790863313</v>
      </c>
      <c r="AD4" s="6">
        <v>3787.11762650146</v>
      </c>
      <c r="AE4" s="6">
        <v>3818.30965446932</v>
      </c>
      <c r="AF4" s="6">
        <v>3903.97046713155</v>
      </c>
      <c r="AG4" s="6">
        <v>3857.47429923797</v>
      </c>
      <c r="AH4" s="6">
        <v>3798.85170057601</v>
      </c>
      <c r="AI4" s="6">
        <v>3670.37133710626</v>
      </c>
      <c r="AJ4" s="6">
        <v>2209.68757337584</v>
      </c>
      <c r="AK4" s="6">
        <v>2223.27356253553</v>
      </c>
      <c r="AL4" s="6">
        <v>2216.94769875565</v>
      </c>
      <c r="AM4" s="6">
        <v>3509.17577436806</v>
      </c>
      <c r="AN4" s="6">
        <v>3669.97104757371</v>
      </c>
      <c r="AO4" s="6">
        <v>3681.46654070801</v>
      </c>
      <c r="AP4" s="6">
        <v>3785.59819150796</v>
      </c>
      <c r="AQ4" s="6">
        <v>3642.5827216743</v>
      </c>
      <c r="AR4" s="6">
        <v>3723.80955254589</v>
      </c>
      <c r="AS4" s="6">
        <v>3738.10133784622</v>
      </c>
      <c r="AT4" s="6">
        <v>3779.26196351086</v>
      </c>
      <c r="AU4" s="6">
        <v>3622.85933356685</v>
      </c>
      <c r="AV4" s="6">
        <v>2202.64314038907</v>
      </c>
      <c r="AW4" s="6">
        <v>2193.48518552212</v>
      </c>
      <c r="AX4" s="6">
        <v>2232.36498607269</v>
      </c>
      <c r="AY4" s="6">
        <v>3703.31564714049</v>
      </c>
      <c r="AZ4" s="6">
        <v>3712.21315943494</v>
      </c>
      <c r="BA4" s="6">
        <v>3686.12358360516</v>
      </c>
      <c r="BB4" s="6">
        <v>3721.54614029136</v>
      </c>
      <c r="BC4" s="6">
        <v>3641.30214539203</v>
      </c>
      <c r="BD4" s="6">
        <v>3628.90947412317</v>
      </c>
      <c r="BE4" s="6">
        <v>2717.93019915804</v>
      </c>
      <c r="BF4" s="6">
        <v>2777.46677162183</v>
      </c>
      <c r="BG4" s="6">
        <v>2260.85320724793</v>
      </c>
      <c r="BH4" s="6">
        <v>2187.03982423812</v>
      </c>
      <c r="BI4" s="6">
        <v>2200.84109952613</v>
      </c>
      <c r="BJ4" s="6">
        <v>2215.60240320053</v>
      </c>
      <c r="BK4" s="6">
        <v>3545.47229129756</v>
      </c>
      <c r="BL4" s="6">
        <v>3583.28241508003</v>
      </c>
      <c r="BM4" s="6">
        <v>3517.29075253314</v>
      </c>
      <c r="BN4" s="6">
        <v>3533.42397674688</v>
      </c>
      <c r="BO4" s="6">
        <v>3410.3303706124</v>
      </c>
      <c r="BP4" s="6">
        <v>3482.69703389326</v>
      </c>
      <c r="BQ4" s="6">
        <v>2380.37727059157</v>
      </c>
      <c r="BR4" s="6">
        <v>2252.39497142012</v>
      </c>
      <c r="BS4" s="6">
        <v>2718.07918931608</v>
      </c>
      <c r="BT4" s="6">
        <v>2196.6538030972</v>
      </c>
      <c r="BU4" s="6">
        <v>2211.44042413963</v>
      </c>
      <c r="BV4" s="6">
        <v>2203.05497103305</v>
      </c>
      <c r="BW4" s="6">
        <v>3675.38070475861</v>
      </c>
      <c r="BX4" s="6">
        <v>3727.50294069374</v>
      </c>
      <c r="BY4" s="6">
        <v>3630.59345670528</v>
      </c>
      <c r="BZ4" s="6">
        <v>3662.08953266596</v>
      </c>
      <c r="CA4" s="6">
        <v>3561.08315270737</v>
      </c>
      <c r="CB4" s="6">
        <v>3617.60085920937</v>
      </c>
      <c r="CC4" s="6">
        <v>2265.12587297289</v>
      </c>
      <c r="CD4" s="6">
        <v>2265.99161749072</v>
      </c>
      <c r="CE4" s="6">
        <v>2666.95073636384</v>
      </c>
      <c r="CF4" s="6">
        <v>2203.28373790498</v>
      </c>
      <c r="CG4" s="6">
        <v>2195.3131024904</v>
      </c>
      <c r="CH4" s="6">
        <v>2183.9665832229</v>
      </c>
      <c r="CI4" s="6">
        <v>3459.53543369129</v>
      </c>
      <c r="CJ4" s="6">
        <v>3577.42515793276</v>
      </c>
      <c r="CK4" s="6">
        <v>3384.2320887631</v>
      </c>
      <c r="CL4" s="6">
        <v>3492.31510968671</v>
      </c>
      <c r="CM4" s="6">
        <v>3447.27828465925</v>
      </c>
      <c r="CN4" s="6">
        <v>3108.35387160167</v>
      </c>
      <c r="CO4" s="6">
        <v>2236.23308389968</v>
      </c>
      <c r="CP4" s="6">
        <v>2527.03273506807</v>
      </c>
      <c r="CQ4" s="6">
        <v>2404.88092119413</v>
      </c>
      <c r="CR4" s="6">
        <v>2178.01942671744</v>
      </c>
      <c r="CS4" s="6">
        <v>2199.24503852262</v>
      </c>
      <c r="CT4" s="6">
        <v>2198.93538155177</v>
      </c>
    </row>
    <row r="5" spans="2:98" ht="15" customHeight="true">
      <c r="B5" s="6">
        <v>66.5</v>
      </c>
      <c r="C5" s="6">
        <v>3591.11918634893</v>
      </c>
      <c r="D5" s="6">
        <v>3496.67763810322</v>
      </c>
      <c r="E5" s="6">
        <v>3720.66315375875</v>
      </c>
      <c r="F5" s="6">
        <v>3633.55001545966</v>
      </c>
      <c r="G5" s="6">
        <v>3612.20297274394</v>
      </c>
      <c r="H5" s="6">
        <v>3720.2415798692</v>
      </c>
      <c r="I5" s="6">
        <v>3618.294255783</v>
      </c>
      <c r="J5" s="6">
        <v>3641.42334406558</v>
      </c>
      <c r="K5" s="6">
        <v>3621.35908335137</v>
      </c>
      <c r="L5" s="6">
        <v>2249.79700160494</v>
      </c>
      <c r="M5" s="6">
        <v>2195.27115521381</v>
      </c>
      <c r="N5" s="6">
        <v>2203.42424848366</v>
      </c>
      <c r="O5" s="6">
        <v>3468.89510086989</v>
      </c>
      <c r="P5" s="6">
        <v>3689.81612316749</v>
      </c>
      <c r="Q5" s="6">
        <v>3640.08330398793</v>
      </c>
      <c r="R5" s="6">
        <v>3662.27907993789</v>
      </c>
      <c r="S5" s="6">
        <v>3625.53508150917</v>
      </c>
      <c r="T5" s="6">
        <v>3641.77378443827</v>
      </c>
      <c r="U5" s="6">
        <v>3657.187759355</v>
      </c>
      <c r="V5" s="6">
        <v>3620.40630715776</v>
      </c>
      <c r="W5" s="6">
        <v>3611.58255002338</v>
      </c>
      <c r="X5" s="6">
        <v>2206.88599591558</v>
      </c>
      <c r="Y5" s="6">
        <v>2212.28406561381</v>
      </c>
      <c r="Z5" s="6">
        <v>2181.82074524418</v>
      </c>
      <c r="AA5" s="6">
        <v>3697.62009902397</v>
      </c>
      <c r="AB5" s="6">
        <v>3822.1817836749</v>
      </c>
      <c r="AC5" s="6">
        <v>3830.51413957287</v>
      </c>
      <c r="AD5" s="6">
        <v>3790.5491123286</v>
      </c>
      <c r="AE5" s="6">
        <v>3823.51846929495</v>
      </c>
      <c r="AF5" s="6">
        <v>3908.5640108102</v>
      </c>
      <c r="AG5" s="6">
        <v>3865.91301691016</v>
      </c>
      <c r="AH5" s="6">
        <v>3801.55114284272</v>
      </c>
      <c r="AI5" s="6">
        <v>3674.00537348431</v>
      </c>
      <c r="AJ5" s="6">
        <v>2209.00812442055</v>
      </c>
      <c r="AK5" s="6">
        <v>2223.05994371079</v>
      </c>
      <c r="AL5" s="6">
        <v>2216.77739267352</v>
      </c>
      <c r="AM5" s="6">
        <v>3514.28274612241</v>
      </c>
      <c r="AN5" s="6">
        <v>3675.978965441</v>
      </c>
      <c r="AO5" s="6">
        <v>3681.66781629871</v>
      </c>
      <c r="AP5" s="6">
        <v>3788.42723673357</v>
      </c>
      <c r="AQ5" s="6">
        <v>3647.22889515112</v>
      </c>
      <c r="AR5" s="6">
        <v>3722.35391670463</v>
      </c>
      <c r="AS5" s="6">
        <v>3740.8226717499</v>
      </c>
      <c r="AT5" s="6">
        <v>3782.84026790175</v>
      </c>
      <c r="AU5" s="6">
        <v>3624.40105766959</v>
      </c>
      <c r="AV5" s="6">
        <v>2202.10868248409</v>
      </c>
      <c r="AW5" s="6">
        <v>2192.75510858357</v>
      </c>
      <c r="AX5" s="6">
        <v>2231.71884218297</v>
      </c>
      <c r="AY5" s="6">
        <v>3702.28186368419</v>
      </c>
      <c r="AZ5" s="6">
        <v>3711.69370807295</v>
      </c>
      <c r="BA5" s="6">
        <v>3685.40595071109</v>
      </c>
      <c r="BB5" s="6">
        <v>3720.59802501792</v>
      </c>
      <c r="BC5" s="6">
        <v>3639.00714969424</v>
      </c>
      <c r="BD5" s="6">
        <v>3629.38684868747</v>
      </c>
      <c r="BE5" s="6">
        <v>2715.12782559512</v>
      </c>
      <c r="BF5" s="6">
        <v>2772.67721205082</v>
      </c>
      <c r="BG5" s="6">
        <v>2260.14473138579</v>
      </c>
      <c r="BH5" s="6">
        <v>2186.24749248635</v>
      </c>
      <c r="BI5" s="6">
        <v>2200.88420285433</v>
      </c>
      <c r="BJ5" s="6">
        <v>2215.05285315258</v>
      </c>
      <c r="BK5" s="6">
        <v>3543.48844969561</v>
      </c>
      <c r="BL5" s="6">
        <v>3582.83341872686</v>
      </c>
      <c r="BM5" s="6">
        <v>3516.14730661103</v>
      </c>
      <c r="BN5" s="6">
        <v>3530.94311668187</v>
      </c>
      <c r="BO5" s="6">
        <v>3408.78792011557</v>
      </c>
      <c r="BP5" s="6">
        <v>3479.11564717636</v>
      </c>
      <c r="BQ5" s="6">
        <v>2377.8497049026</v>
      </c>
      <c r="BR5" s="6">
        <v>2252.22056149693</v>
      </c>
      <c r="BS5" s="6">
        <v>2713.09516645776</v>
      </c>
      <c r="BT5" s="6">
        <v>2196.10545492355</v>
      </c>
      <c r="BU5" s="6">
        <v>2211.1521804049</v>
      </c>
      <c r="BV5" s="6">
        <v>2202.54783493005</v>
      </c>
      <c r="BW5" s="6">
        <v>3674.09666278048</v>
      </c>
      <c r="BX5" s="6">
        <v>3724.47314164784</v>
      </c>
      <c r="BY5" s="6">
        <v>3630.52330201889</v>
      </c>
      <c r="BZ5" s="6">
        <v>3662.65016804251</v>
      </c>
      <c r="CA5" s="6">
        <v>3560.68826360876</v>
      </c>
      <c r="CB5" s="6">
        <v>3617.28760552771</v>
      </c>
      <c r="CC5" s="6">
        <v>2265.56306114328</v>
      </c>
      <c r="CD5" s="6">
        <v>2265.65051424103</v>
      </c>
      <c r="CE5" s="6">
        <v>2662.93247080748</v>
      </c>
      <c r="CF5" s="6">
        <v>2202.54846254963</v>
      </c>
      <c r="CG5" s="6">
        <v>2194.79899025966</v>
      </c>
      <c r="CH5" s="6">
        <v>2183.5152831953</v>
      </c>
      <c r="CI5" s="6">
        <v>3457.72217680463</v>
      </c>
      <c r="CJ5" s="6">
        <v>3577.14684943173</v>
      </c>
      <c r="CK5" s="6">
        <v>3383.2680867527</v>
      </c>
      <c r="CL5" s="6">
        <v>3488.77549040286</v>
      </c>
      <c r="CM5" s="6">
        <v>3442.97459616096</v>
      </c>
      <c r="CN5" s="6">
        <v>3088.04916831562</v>
      </c>
      <c r="CO5" s="6">
        <v>2236.7909482136</v>
      </c>
      <c r="CP5" s="6">
        <v>2524.46400919419</v>
      </c>
      <c r="CQ5" s="6">
        <v>2403.46316992996</v>
      </c>
      <c r="CR5" s="6">
        <v>2177.80215553428</v>
      </c>
      <c r="CS5" s="6">
        <v>2198.28493640386</v>
      </c>
      <c r="CT5" s="6">
        <v>2198.0770609995</v>
      </c>
    </row>
    <row r="6" spans="2:98" ht="15" customHeight="true">
      <c r="B6" s="6">
        <v>67</v>
      </c>
      <c r="C6" s="6">
        <v>3596.8696128036</v>
      </c>
      <c r="D6" s="6">
        <v>3499.78538965241</v>
      </c>
      <c r="E6" s="6">
        <v>3723.19781827254</v>
      </c>
      <c r="F6" s="6">
        <v>3634.68452103896</v>
      </c>
      <c r="G6" s="6">
        <v>3618.56739399637</v>
      </c>
      <c r="H6" s="6">
        <v>3723.9440466834</v>
      </c>
      <c r="I6" s="6">
        <v>3621.28930323352</v>
      </c>
      <c r="J6" s="6">
        <v>3647.49010262202</v>
      </c>
      <c r="K6" s="6">
        <v>3626.5253714197</v>
      </c>
      <c r="L6" s="6">
        <v>2248.91208831511</v>
      </c>
      <c r="M6" s="6">
        <v>2194.72760213668</v>
      </c>
      <c r="N6" s="6">
        <v>2203.10224043888</v>
      </c>
      <c r="O6" s="6">
        <v>3472.511709044</v>
      </c>
      <c r="P6" s="6">
        <v>3693.76526419572</v>
      </c>
      <c r="Q6" s="6">
        <v>3644.04160602288</v>
      </c>
      <c r="R6" s="6">
        <v>3663.86503804654</v>
      </c>
      <c r="S6" s="6">
        <v>3627.46555104195</v>
      </c>
      <c r="T6" s="6">
        <v>3644.49101267367</v>
      </c>
      <c r="U6" s="6">
        <v>3659.32872940785</v>
      </c>
      <c r="V6" s="6">
        <v>3620.76740455601</v>
      </c>
      <c r="W6" s="6">
        <v>3615.8079387876</v>
      </c>
      <c r="X6" s="6">
        <v>2206.46890118794</v>
      </c>
      <c r="Y6" s="6">
        <v>2211.30090882839</v>
      </c>
      <c r="Z6" s="6">
        <v>2181.76068463365</v>
      </c>
      <c r="AA6" s="6">
        <v>3701.88836186241</v>
      </c>
      <c r="AB6" s="6">
        <v>3828.73457703104</v>
      </c>
      <c r="AC6" s="6">
        <v>3835.75037051261</v>
      </c>
      <c r="AD6" s="6">
        <v>3793.98059815574</v>
      </c>
      <c r="AE6" s="6">
        <v>3828.72728412057</v>
      </c>
      <c r="AF6" s="6">
        <v>3913.15755448885</v>
      </c>
      <c r="AG6" s="6">
        <v>3874.35173458236</v>
      </c>
      <c r="AH6" s="6">
        <v>3804.25058510943</v>
      </c>
      <c r="AI6" s="6">
        <v>3677.63940986236</v>
      </c>
      <c r="AJ6" s="6">
        <v>2208.32867546525</v>
      </c>
      <c r="AK6" s="6">
        <v>2222.84632488605</v>
      </c>
      <c r="AL6" s="6">
        <v>2216.6070865914</v>
      </c>
      <c r="AM6" s="6">
        <v>3519.38971787677</v>
      </c>
      <c r="AN6" s="6">
        <v>3681.98688330829</v>
      </c>
      <c r="AO6" s="6">
        <v>3681.86909188942</v>
      </c>
      <c r="AP6" s="6">
        <v>3791.25628195918</v>
      </c>
      <c r="AQ6" s="6">
        <v>3651.87506862794</v>
      </c>
      <c r="AR6" s="6">
        <v>3720.89828086337</v>
      </c>
      <c r="AS6" s="6">
        <v>3743.54400565358</v>
      </c>
      <c r="AT6" s="6">
        <v>3786.41857229264</v>
      </c>
      <c r="AU6" s="6">
        <v>3625.94278177233</v>
      </c>
      <c r="AV6" s="6">
        <v>2201.5742245791</v>
      </c>
      <c r="AW6" s="6">
        <v>2192.02503164502</v>
      </c>
      <c r="AX6" s="6">
        <v>2231.07269829326</v>
      </c>
      <c r="AY6" s="6">
        <v>3701.24808022788</v>
      </c>
      <c r="AZ6" s="6">
        <v>3711.17425671096</v>
      </c>
      <c r="BA6" s="6">
        <v>3684.68831781702</v>
      </c>
      <c r="BB6" s="6">
        <v>3719.64990974447</v>
      </c>
      <c r="BC6" s="6">
        <v>3636.71215399645</v>
      </c>
      <c r="BD6" s="6">
        <v>3629.86422325178</v>
      </c>
      <c r="BE6" s="6">
        <v>2712.32545203219</v>
      </c>
      <c r="BF6" s="6">
        <v>2767.8876524798</v>
      </c>
      <c r="BG6" s="6">
        <v>2259.43625552366</v>
      </c>
      <c r="BH6" s="6">
        <v>2185.45516073458</v>
      </c>
      <c r="BI6" s="6">
        <v>2200.92730618253</v>
      </c>
      <c r="BJ6" s="6">
        <v>2214.50330310464</v>
      </c>
      <c r="BK6" s="6">
        <v>3541.50460809365</v>
      </c>
      <c r="BL6" s="6">
        <v>3582.38442237368</v>
      </c>
      <c r="BM6" s="6">
        <v>3515.00386068892</v>
      </c>
      <c r="BN6" s="6">
        <v>3528.46225661686</v>
      </c>
      <c r="BO6" s="6">
        <v>3407.24546961873</v>
      </c>
      <c r="BP6" s="6">
        <v>3475.53426045947</v>
      </c>
      <c r="BQ6" s="6">
        <v>2375.32213921362</v>
      </c>
      <c r="BR6" s="6">
        <v>2252.04615157374</v>
      </c>
      <c r="BS6" s="6">
        <v>2708.11114359946</v>
      </c>
      <c r="BT6" s="6">
        <v>2195.55710674991</v>
      </c>
      <c r="BU6" s="6">
        <v>2210.86393667017</v>
      </c>
      <c r="BV6" s="6">
        <v>2202.04069882704</v>
      </c>
      <c r="BW6" s="6">
        <v>3672.81262080236</v>
      </c>
      <c r="BX6" s="6">
        <v>3721.44334260194</v>
      </c>
      <c r="BY6" s="6">
        <v>3630.4531473325</v>
      </c>
      <c r="BZ6" s="6">
        <v>3663.21080341907</v>
      </c>
      <c r="CA6" s="6">
        <v>3560.29337451015</v>
      </c>
      <c r="CB6" s="6">
        <v>3616.97435184604</v>
      </c>
      <c r="CC6" s="6">
        <v>2266.00024931366</v>
      </c>
      <c r="CD6" s="6">
        <v>2265.30941099133</v>
      </c>
      <c r="CE6" s="6">
        <v>2658.91420525113</v>
      </c>
      <c r="CF6" s="6">
        <v>2201.81318719427</v>
      </c>
      <c r="CG6" s="6">
        <v>2194.28487802892</v>
      </c>
      <c r="CH6" s="6">
        <v>2183.06398316771</v>
      </c>
      <c r="CI6" s="6">
        <v>3455.90891991797</v>
      </c>
      <c r="CJ6" s="6">
        <v>3576.8685409307</v>
      </c>
      <c r="CK6" s="6">
        <v>3382.3040847423</v>
      </c>
      <c r="CL6" s="6">
        <v>3485.235871119</v>
      </c>
      <c r="CM6" s="6">
        <v>3438.67090766266</v>
      </c>
      <c r="CN6" s="6">
        <v>3067.74446502958</v>
      </c>
      <c r="CO6" s="6">
        <v>2237.34881252752</v>
      </c>
      <c r="CP6" s="6">
        <v>2521.89528332032</v>
      </c>
      <c r="CQ6" s="6">
        <v>2402.04541866578</v>
      </c>
      <c r="CR6" s="6">
        <v>2177.58488435112</v>
      </c>
      <c r="CS6" s="6">
        <v>2197.32483428509</v>
      </c>
      <c r="CT6" s="6">
        <v>2197.21874044724</v>
      </c>
    </row>
    <row r="7" spans="2:98" ht="15" customHeight="true">
      <c r="B7" s="6">
        <v>67.5</v>
      </c>
      <c r="C7" s="6">
        <v>3602.62003925826</v>
      </c>
      <c r="D7" s="6">
        <v>3502.89314120162</v>
      </c>
      <c r="E7" s="6">
        <v>3725.73248278631</v>
      </c>
      <c r="F7" s="6">
        <v>3635.8190266183</v>
      </c>
      <c r="G7" s="6">
        <v>3624.93181524877</v>
      </c>
      <c r="H7" s="6">
        <v>3727.64651349762</v>
      </c>
      <c r="I7" s="6">
        <v>3624.28435068404</v>
      </c>
      <c r="J7" s="6">
        <v>3653.55686117847</v>
      </c>
      <c r="K7" s="6">
        <v>3631.69165948806</v>
      </c>
      <c r="L7" s="6">
        <v>2248.02717502533</v>
      </c>
      <c r="M7" s="6">
        <v>2194.18404905958</v>
      </c>
      <c r="N7" s="6">
        <v>2202.78023239405</v>
      </c>
      <c r="O7" s="6">
        <v>3476.12831721812</v>
      </c>
      <c r="P7" s="6">
        <v>3697.71440522397</v>
      </c>
      <c r="Q7" s="6">
        <v>3647.99990805784</v>
      </c>
      <c r="R7" s="6">
        <v>3665.45099615515</v>
      </c>
      <c r="S7" s="6">
        <v>3629.39602057472</v>
      </c>
      <c r="T7" s="6">
        <v>3647.20824090903</v>
      </c>
      <c r="U7" s="6">
        <v>3661.46969946069</v>
      </c>
      <c r="V7" s="6">
        <v>3621.12850195422</v>
      </c>
      <c r="W7" s="6">
        <v>3620.0333275518</v>
      </c>
      <c r="X7" s="6">
        <v>2206.05180646026</v>
      </c>
      <c r="Y7" s="6">
        <v>2210.31775204298</v>
      </c>
      <c r="Z7" s="6">
        <v>2181.70062402314</v>
      </c>
      <c r="AA7" s="6">
        <v>3706.15662470086</v>
      </c>
      <c r="AB7" s="6">
        <v>3835.28737038717</v>
      </c>
      <c r="AC7" s="6">
        <v>3840.9866014524</v>
      </c>
      <c r="AD7" s="6">
        <v>3797.41208398286</v>
      </c>
      <c r="AE7" s="6">
        <v>3833.93609894623</v>
      </c>
      <c r="AF7" s="6">
        <v>3917.75109816746</v>
      </c>
      <c r="AG7" s="6">
        <v>3882.79045225453</v>
      </c>
      <c r="AH7" s="6">
        <v>3806.95002737618</v>
      </c>
      <c r="AI7" s="6">
        <v>3681.27344624041</v>
      </c>
      <c r="AJ7" s="6">
        <v>2207.64922651</v>
      </c>
      <c r="AK7" s="6">
        <v>2222.63270606133</v>
      </c>
      <c r="AL7" s="6">
        <v>2216.43678050931</v>
      </c>
      <c r="AM7" s="6">
        <v>3524.49668963112</v>
      </c>
      <c r="AN7" s="6">
        <v>3687.99480117558</v>
      </c>
      <c r="AO7" s="6">
        <v>3682.07036748016</v>
      </c>
      <c r="AP7" s="6">
        <v>3794.0853271848</v>
      </c>
      <c r="AQ7" s="6">
        <v>3656.52124210476</v>
      </c>
      <c r="AR7" s="6">
        <v>3719.44264502213</v>
      </c>
      <c r="AS7" s="6">
        <v>3746.26533955731</v>
      </c>
      <c r="AT7" s="6">
        <v>3789.99687668356</v>
      </c>
      <c r="AU7" s="6">
        <v>3627.48450587508</v>
      </c>
      <c r="AV7" s="6">
        <v>2201.03976667415</v>
      </c>
      <c r="AW7" s="6">
        <v>2191.2949547065</v>
      </c>
      <c r="AX7" s="6">
        <v>2230.42655440354</v>
      </c>
      <c r="AY7" s="6">
        <v>3700.2142967716</v>
      </c>
      <c r="AZ7" s="6">
        <v>3710.65480534902</v>
      </c>
      <c r="BA7" s="6">
        <v>3683.97068492294</v>
      </c>
      <c r="BB7" s="6">
        <v>3718.701794471</v>
      </c>
      <c r="BC7" s="6">
        <v>3634.41715829865</v>
      </c>
      <c r="BD7" s="6">
        <v>3630.34159781605</v>
      </c>
      <c r="BE7" s="6">
        <v>2709.52307846925</v>
      </c>
      <c r="BF7" s="6">
        <v>2763.09809290878</v>
      </c>
      <c r="BG7" s="6">
        <v>2258.72777966149</v>
      </c>
      <c r="BH7" s="6">
        <v>2184.66282898279</v>
      </c>
      <c r="BI7" s="6">
        <v>2200.9704095107</v>
      </c>
      <c r="BJ7" s="6">
        <v>2213.95375305672</v>
      </c>
      <c r="BK7" s="6">
        <v>3539.5207664917</v>
      </c>
      <c r="BL7" s="6">
        <v>3581.93542602049</v>
      </c>
      <c r="BM7" s="6">
        <v>3513.8604147668</v>
      </c>
      <c r="BN7" s="6">
        <v>3525.98139655183</v>
      </c>
      <c r="BO7" s="6">
        <v>3405.70301912188</v>
      </c>
      <c r="BP7" s="6">
        <v>3471.95287374257</v>
      </c>
      <c r="BQ7" s="6">
        <v>2372.7945735246</v>
      </c>
      <c r="BR7" s="6">
        <v>2251.8717416506</v>
      </c>
      <c r="BS7" s="6">
        <v>2703.12712074116</v>
      </c>
      <c r="BT7" s="6">
        <v>2195.00875857628</v>
      </c>
      <c r="BU7" s="6">
        <v>2210.57569293541</v>
      </c>
      <c r="BV7" s="6">
        <v>2201.53356272405</v>
      </c>
      <c r="BW7" s="6">
        <v>3671.52857882422</v>
      </c>
      <c r="BX7" s="6">
        <v>3718.41354355602</v>
      </c>
      <c r="BY7" s="6">
        <v>3630.38299264613</v>
      </c>
      <c r="BZ7" s="6">
        <v>3663.77143879559</v>
      </c>
      <c r="CA7" s="6">
        <v>3559.89848541157</v>
      </c>
      <c r="CB7" s="6">
        <v>3616.66109816438</v>
      </c>
      <c r="CC7" s="6">
        <v>2266.43743748404</v>
      </c>
      <c r="CD7" s="6">
        <v>2264.96830774167</v>
      </c>
      <c r="CE7" s="6">
        <v>2654.89593969475</v>
      </c>
      <c r="CF7" s="6">
        <v>2201.07791183894</v>
      </c>
      <c r="CG7" s="6">
        <v>2193.7707657982</v>
      </c>
      <c r="CH7" s="6">
        <v>2182.61268314008</v>
      </c>
      <c r="CI7" s="6">
        <v>3454.09566303131</v>
      </c>
      <c r="CJ7" s="6">
        <v>3576.59023242962</v>
      </c>
      <c r="CK7" s="6">
        <v>3381.34008273191</v>
      </c>
      <c r="CL7" s="6">
        <v>3481.69625183518</v>
      </c>
      <c r="CM7" s="6">
        <v>3434.36721916439</v>
      </c>
      <c r="CN7" s="6">
        <v>3047.43976174349</v>
      </c>
      <c r="CO7" s="6">
        <v>2237.90667684147</v>
      </c>
      <c r="CP7" s="6">
        <v>2519.3265574464</v>
      </c>
      <c r="CQ7" s="6">
        <v>2400.62766740164</v>
      </c>
      <c r="CR7" s="6">
        <v>2177.36761316791</v>
      </c>
      <c r="CS7" s="6">
        <v>2196.36473216631</v>
      </c>
      <c r="CT7" s="6">
        <v>2196.36041989497</v>
      </c>
    </row>
    <row r="8" spans="2:98" ht="15" customHeight="true">
      <c r="B8" s="6">
        <v>68</v>
      </c>
      <c r="C8" s="6">
        <v>3608.37046571293</v>
      </c>
      <c r="D8" s="6">
        <v>3506.00089275081</v>
      </c>
      <c r="E8" s="6">
        <v>3728.26714730011</v>
      </c>
      <c r="F8" s="6">
        <v>3636.9535321976</v>
      </c>
      <c r="G8" s="6">
        <v>3631.2962365012</v>
      </c>
      <c r="H8" s="6">
        <v>3731.34898031182</v>
      </c>
      <c r="I8" s="6">
        <v>3627.27939813456</v>
      </c>
      <c r="J8" s="6">
        <v>3659.6236197349</v>
      </c>
      <c r="K8" s="6">
        <v>3636.85794755638</v>
      </c>
      <c r="L8" s="6">
        <v>2247.14226173551</v>
      </c>
      <c r="M8" s="6">
        <v>2193.64049598245</v>
      </c>
      <c r="N8" s="6">
        <v>2202.45822434927</v>
      </c>
      <c r="O8" s="6">
        <v>3479.74492539223</v>
      </c>
      <c r="P8" s="6">
        <v>3701.6635462522</v>
      </c>
      <c r="Q8" s="6">
        <v>3651.95821009279</v>
      </c>
      <c r="R8" s="6">
        <v>3667.0369542638</v>
      </c>
      <c r="S8" s="6">
        <v>3631.3264901075</v>
      </c>
      <c r="T8" s="6">
        <v>3649.92546914442</v>
      </c>
      <c r="U8" s="6">
        <v>3663.61066951354</v>
      </c>
      <c r="V8" s="6">
        <v>3621.48959935246</v>
      </c>
      <c r="W8" s="6">
        <v>3624.25871631602</v>
      </c>
      <c r="X8" s="6">
        <v>2205.63471173262</v>
      </c>
      <c r="Y8" s="6">
        <v>2209.33459525756</v>
      </c>
      <c r="Z8" s="6">
        <v>2181.64056341262</v>
      </c>
      <c r="AA8" s="6">
        <v>3710.4248875393</v>
      </c>
      <c r="AB8" s="6">
        <v>3841.84016374331</v>
      </c>
      <c r="AC8" s="6">
        <v>3846.22283239214</v>
      </c>
      <c r="AD8" s="6">
        <v>3800.84356981</v>
      </c>
      <c r="AE8" s="6">
        <v>3839.14491377186</v>
      </c>
      <c r="AF8" s="6">
        <v>3922.34464184612</v>
      </c>
      <c r="AG8" s="6">
        <v>3891.22916992672</v>
      </c>
      <c r="AH8" s="6">
        <v>3809.64946964289</v>
      </c>
      <c r="AI8" s="6">
        <v>3684.90748261847</v>
      </c>
      <c r="AJ8" s="6">
        <v>2206.9697775547</v>
      </c>
      <c r="AK8" s="6">
        <v>2222.41908723659</v>
      </c>
      <c r="AL8" s="6">
        <v>2216.26647442719</v>
      </c>
      <c r="AM8" s="6">
        <v>3529.60366138548</v>
      </c>
      <c r="AN8" s="6">
        <v>3694.00271904288</v>
      </c>
      <c r="AO8" s="6">
        <v>3682.27164307087</v>
      </c>
      <c r="AP8" s="6">
        <v>3796.91437241041</v>
      </c>
      <c r="AQ8" s="6">
        <v>3661.16741558158</v>
      </c>
      <c r="AR8" s="6">
        <v>3717.98700918087</v>
      </c>
      <c r="AS8" s="6">
        <v>3748.98667346099</v>
      </c>
      <c r="AT8" s="6">
        <v>3793.57518107445</v>
      </c>
      <c r="AU8" s="6">
        <v>3629.02622997782</v>
      </c>
      <c r="AV8" s="6">
        <v>2200.50530876916</v>
      </c>
      <c r="AW8" s="6">
        <v>2190.56487776795</v>
      </c>
      <c r="AX8" s="6">
        <v>2229.78041051383</v>
      </c>
      <c r="AY8" s="6">
        <v>3699.1805133153</v>
      </c>
      <c r="AZ8" s="6">
        <v>3710.13535398703</v>
      </c>
      <c r="BA8" s="6">
        <v>3683.25305202887</v>
      </c>
      <c r="BB8" s="6">
        <v>3717.75367919755</v>
      </c>
      <c r="BC8" s="6">
        <v>3632.12216260086</v>
      </c>
      <c r="BD8" s="6">
        <v>3630.81897238036</v>
      </c>
      <c r="BE8" s="6">
        <v>2706.72070490632</v>
      </c>
      <c r="BF8" s="6">
        <v>2758.30853333776</v>
      </c>
      <c r="BG8" s="6">
        <v>2258.01930379936</v>
      </c>
      <c r="BH8" s="6">
        <v>2183.87049723102</v>
      </c>
      <c r="BI8" s="6">
        <v>2201.0135128389</v>
      </c>
      <c r="BJ8" s="6">
        <v>2213.40420300877</v>
      </c>
      <c r="BK8" s="6">
        <v>3537.53692488975</v>
      </c>
      <c r="BL8" s="6">
        <v>3581.48642966731</v>
      </c>
      <c r="BM8" s="6">
        <v>3512.71696884469</v>
      </c>
      <c r="BN8" s="6">
        <v>3523.50053648682</v>
      </c>
      <c r="BO8" s="6">
        <v>3404.16056862504</v>
      </c>
      <c r="BP8" s="6">
        <v>3468.37148702567</v>
      </c>
      <c r="BQ8" s="6">
        <v>2370.26700783563</v>
      </c>
      <c r="BR8" s="6">
        <v>2251.69733172741</v>
      </c>
      <c r="BS8" s="6">
        <v>2698.14309788285</v>
      </c>
      <c r="BT8" s="6">
        <v>2194.46041040263</v>
      </c>
      <c r="BU8" s="6">
        <v>2210.28744920068</v>
      </c>
      <c r="BV8" s="6">
        <v>2201.02642662104</v>
      </c>
      <c r="BW8" s="6">
        <v>3670.24453684609</v>
      </c>
      <c r="BX8" s="6">
        <v>3715.38374451012</v>
      </c>
      <c r="BY8" s="6">
        <v>3630.31283795974</v>
      </c>
      <c r="BZ8" s="6">
        <v>3664.33207417215</v>
      </c>
      <c r="CA8" s="6">
        <v>3559.50359631296</v>
      </c>
      <c r="CB8" s="6">
        <v>3616.34784448272</v>
      </c>
      <c r="CC8" s="6">
        <v>2266.87462565443</v>
      </c>
      <c r="CD8" s="6">
        <v>2264.62720449198</v>
      </c>
      <c r="CE8" s="6">
        <v>2650.8776741384</v>
      </c>
      <c r="CF8" s="6">
        <v>2200.34263648358</v>
      </c>
      <c r="CG8" s="6">
        <v>2193.25665356746</v>
      </c>
      <c r="CH8" s="6">
        <v>2182.16138311248</v>
      </c>
      <c r="CI8" s="6">
        <v>3452.28240614465</v>
      </c>
      <c r="CJ8" s="6">
        <v>3576.31192392859</v>
      </c>
      <c r="CK8" s="6">
        <v>3380.3760807215</v>
      </c>
      <c r="CL8" s="6">
        <v>3478.15663255133</v>
      </c>
      <c r="CM8" s="6">
        <v>3430.0635306661</v>
      </c>
      <c r="CN8" s="6">
        <v>3027.13505845744</v>
      </c>
      <c r="CO8" s="6">
        <v>2238.46454115539</v>
      </c>
      <c r="CP8" s="6">
        <v>2516.75783157252</v>
      </c>
      <c r="CQ8" s="6">
        <v>2399.20991613746</v>
      </c>
      <c r="CR8" s="6">
        <v>2177.15034198475</v>
      </c>
      <c r="CS8" s="6">
        <v>2195.40463004755</v>
      </c>
      <c r="CT8" s="6">
        <v>2195.5020993427</v>
      </c>
    </row>
    <row r="9" spans="2:98" ht="15" customHeight="true">
      <c r="B9" s="6">
        <v>68.5</v>
      </c>
      <c r="C9" s="6">
        <v>3611.65100363296</v>
      </c>
      <c r="D9" s="6">
        <v>3508.98319519412</v>
      </c>
      <c r="E9" s="6">
        <v>3726.39780577333</v>
      </c>
      <c r="F9" s="6">
        <v>3637.46608080174</v>
      </c>
      <c r="G9" s="6">
        <v>3634.78323610599</v>
      </c>
      <c r="H9" s="6">
        <v>3735.31506828135</v>
      </c>
      <c r="I9" s="6">
        <v>3631.17657724051</v>
      </c>
      <c r="J9" s="6">
        <v>3664.22962693267</v>
      </c>
      <c r="K9" s="6">
        <v>3641.87939671009</v>
      </c>
      <c r="L9" s="6">
        <v>2246.55578336512</v>
      </c>
      <c r="M9" s="6">
        <v>2193.00054926747</v>
      </c>
      <c r="N9" s="6">
        <v>2201.87925937753</v>
      </c>
      <c r="O9" s="6">
        <v>3482.41162930248</v>
      </c>
      <c r="P9" s="6">
        <v>3704.83377591124</v>
      </c>
      <c r="Q9" s="6">
        <v>3651.96720595853</v>
      </c>
      <c r="R9" s="6">
        <v>3664.99205218807</v>
      </c>
      <c r="S9" s="6">
        <v>3628.94432615144</v>
      </c>
      <c r="T9" s="6">
        <v>3649.94165497939</v>
      </c>
      <c r="U9" s="6">
        <v>3661.64566763388</v>
      </c>
      <c r="V9" s="6">
        <v>3619.0990608657</v>
      </c>
      <c r="W9" s="6">
        <v>3627.3008585711</v>
      </c>
      <c r="X9" s="6">
        <v>2205.1819780401</v>
      </c>
      <c r="Y9" s="6">
        <v>2208.38874689219</v>
      </c>
      <c r="Z9" s="6">
        <v>2181.78251818192</v>
      </c>
      <c r="AA9" s="6">
        <v>3714.32263241753</v>
      </c>
      <c r="AB9" s="6">
        <v>3844.41922439644</v>
      </c>
      <c r="AC9" s="6">
        <v>3850.72557672241</v>
      </c>
      <c r="AD9" s="6">
        <v>3803.07544168171</v>
      </c>
      <c r="AE9" s="6">
        <v>3842.84927215421</v>
      </c>
      <c r="AF9" s="6">
        <v>3922.37814410921</v>
      </c>
      <c r="AG9" s="6">
        <v>3900.09385697895</v>
      </c>
      <c r="AH9" s="6">
        <v>3811.98745764374</v>
      </c>
      <c r="AI9" s="6">
        <v>3687.73755073292</v>
      </c>
      <c r="AJ9" s="6">
        <v>2205.98985813995</v>
      </c>
      <c r="AK9" s="6">
        <v>2221.90708397397</v>
      </c>
      <c r="AL9" s="6">
        <v>2215.68809390871</v>
      </c>
      <c r="AM9" s="6">
        <v>3533.7072369302</v>
      </c>
      <c r="AN9" s="6">
        <v>3697.43213021814</v>
      </c>
      <c r="AO9" s="6">
        <v>3678.82797156751</v>
      </c>
      <c r="AP9" s="6">
        <v>3795.0162298689</v>
      </c>
      <c r="AQ9" s="6">
        <v>3665.28327463491</v>
      </c>
      <c r="AR9" s="6">
        <v>3714.28264710105</v>
      </c>
      <c r="AS9" s="6">
        <v>3749.88233620565</v>
      </c>
      <c r="AT9" s="6">
        <v>3794.5925073187</v>
      </c>
      <c r="AU9" s="6">
        <v>3629.4646448153</v>
      </c>
      <c r="AV9" s="6">
        <v>2199.95674954165</v>
      </c>
      <c r="AW9" s="6">
        <v>2189.62035280727</v>
      </c>
      <c r="AX9" s="6">
        <v>2229.23760534903</v>
      </c>
      <c r="AY9" s="6">
        <v>3694.89638208068</v>
      </c>
      <c r="AZ9" s="6">
        <v>3705.46276057127</v>
      </c>
      <c r="BA9" s="6">
        <v>3677.10215787276</v>
      </c>
      <c r="BB9" s="6">
        <v>3711.5705010297</v>
      </c>
      <c r="BC9" s="6">
        <v>3624.76629171972</v>
      </c>
      <c r="BD9" s="6">
        <v>3627.85284623861</v>
      </c>
      <c r="BE9" s="6">
        <v>2702.55533124476</v>
      </c>
      <c r="BF9" s="6">
        <v>2752.72551507407</v>
      </c>
      <c r="BG9" s="6">
        <v>2257.14144579874</v>
      </c>
      <c r="BH9" s="6">
        <v>2182.82648018675</v>
      </c>
      <c r="BI9" s="6">
        <v>2201.21348035117</v>
      </c>
      <c r="BJ9" s="6">
        <v>2212.99578300458</v>
      </c>
      <c r="BK9" s="6">
        <v>3531.42703514774</v>
      </c>
      <c r="BL9" s="6">
        <v>3576.51152366123</v>
      </c>
      <c r="BM9" s="6">
        <v>3506.95006885772</v>
      </c>
      <c r="BN9" s="6">
        <v>3516.2300358546</v>
      </c>
      <c r="BO9" s="6">
        <v>3398.96717979442</v>
      </c>
      <c r="BP9" s="6">
        <v>3460.20095935079</v>
      </c>
      <c r="BQ9" s="6">
        <v>2367.57429961371</v>
      </c>
      <c r="BR9" s="6">
        <v>2251.93625197726</v>
      </c>
      <c r="BS9" s="6">
        <v>2692.39875346354</v>
      </c>
      <c r="BT9" s="6">
        <v>2194.32539770496</v>
      </c>
      <c r="BU9" s="6">
        <v>2210.02080435431</v>
      </c>
      <c r="BV9" s="6">
        <v>2200.51252761463</v>
      </c>
      <c r="BW9" s="6">
        <v>3665.71282860926</v>
      </c>
      <c r="BX9" s="6">
        <v>3707.7819010506</v>
      </c>
      <c r="BY9" s="6">
        <v>3626.59780102636</v>
      </c>
      <c r="BZ9" s="6">
        <v>3660.52559686169</v>
      </c>
      <c r="CA9" s="6">
        <v>3555.27196640018</v>
      </c>
      <c r="CB9" s="6">
        <v>3610.12347476399</v>
      </c>
      <c r="CC9" s="6">
        <v>2267.21947027364</v>
      </c>
      <c r="CD9" s="6">
        <v>2263.98452428165</v>
      </c>
      <c r="CE9" s="6">
        <v>2646.34031580428</v>
      </c>
      <c r="CF9" s="6">
        <v>2200.16546276491</v>
      </c>
      <c r="CG9" s="6">
        <v>2192.66021735935</v>
      </c>
      <c r="CH9" s="6">
        <v>2181.75525383829</v>
      </c>
      <c r="CI9" s="6">
        <v>3446.49251500056</v>
      </c>
      <c r="CJ9" s="6">
        <v>3571.70436354523</v>
      </c>
      <c r="CK9" s="6">
        <v>3375.40236046172</v>
      </c>
      <c r="CL9" s="6">
        <v>3469.32978215962</v>
      </c>
      <c r="CM9" s="6">
        <v>3421.21794612016</v>
      </c>
      <c r="CN9" s="6">
        <v>3005.62756464203</v>
      </c>
      <c r="CO9" s="6">
        <v>2238.72927827392</v>
      </c>
      <c r="CP9" s="6">
        <v>2513.67833704162</v>
      </c>
      <c r="CQ9" s="6">
        <v>2397.56411088588</v>
      </c>
      <c r="CR9" s="6">
        <v>2177.11359470998</v>
      </c>
      <c r="CS9" s="6">
        <v>2194.87995906076</v>
      </c>
      <c r="CT9" s="6">
        <v>2195.08647937972</v>
      </c>
    </row>
    <row r="10" spans="2:98" ht="15" customHeight="true">
      <c r="B10" s="6">
        <v>69</v>
      </c>
      <c r="C10" s="6">
        <v>3611.5880152769</v>
      </c>
      <c r="D10" s="6">
        <v>3511.82792562554</v>
      </c>
      <c r="E10" s="6">
        <v>3719.53309479631</v>
      </c>
      <c r="F10" s="6">
        <v>3636.33392630435</v>
      </c>
      <c r="G10" s="6">
        <v>3633.4933462094</v>
      </c>
      <c r="H10" s="6">
        <v>3738.02956129169</v>
      </c>
      <c r="I10" s="6">
        <v>3634.03307194085</v>
      </c>
      <c r="J10" s="6">
        <v>3665.12445268683</v>
      </c>
      <c r="K10" s="6">
        <v>3645.05133085136</v>
      </c>
      <c r="L10" s="6">
        <v>2245.81862728973</v>
      </c>
      <c r="M10" s="6">
        <v>2192.16860589038</v>
      </c>
      <c r="N10" s="6">
        <v>2201.03850378779</v>
      </c>
      <c r="O10" s="6">
        <v>3483.94065013475</v>
      </c>
      <c r="P10" s="6">
        <v>3706.53427688208</v>
      </c>
      <c r="Q10" s="6">
        <v>3647.60911684221</v>
      </c>
      <c r="R10" s="6">
        <v>3658.26172448198</v>
      </c>
      <c r="S10" s="6">
        <v>3620.9453170969</v>
      </c>
      <c r="T10" s="6">
        <v>3646.62858207658</v>
      </c>
      <c r="U10" s="6">
        <v>3654.65491682266</v>
      </c>
      <c r="V10" s="6">
        <v>3612.61431907561</v>
      </c>
      <c r="W10" s="6">
        <v>3627.68441095436</v>
      </c>
      <c r="X10" s="6">
        <v>2204.87497511033</v>
      </c>
      <c r="Y10" s="6">
        <v>2207.5357394559</v>
      </c>
      <c r="Z10" s="6">
        <v>2181.81896254751</v>
      </c>
      <c r="AA10" s="6">
        <v>3716.81244358628</v>
      </c>
      <c r="AB10" s="6">
        <v>3841.7928442652</v>
      </c>
      <c r="AC10" s="6">
        <v>3852.26792080557</v>
      </c>
      <c r="AD10" s="6">
        <v>3802.88936758695</v>
      </c>
      <c r="AE10" s="6">
        <v>3843.17637511904</v>
      </c>
      <c r="AF10" s="6">
        <v>3916.42376956863</v>
      </c>
      <c r="AG10" s="6">
        <v>3907.77970322292</v>
      </c>
      <c r="AH10" s="6">
        <v>3811.7313034036</v>
      </c>
      <c r="AI10" s="6">
        <v>3688.28509524034</v>
      </c>
      <c r="AJ10" s="6">
        <v>2205.23910176932</v>
      </c>
      <c r="AK10" s="6">
        <v>2221.92098590113</v>
      </c>
      <c r="AL10" s="6">
        <v>2214.91814540295</v>
      </c>
      <c r="AM10" s="6">
        <v>3535.30528648527</v>
      </c>
      <c r="AN10" s="6">
        <v>3697.49846892033</v>
      </c>
      <c r="AO10" s="6">
        <v>3670.46295717598</v>
      </c>
      <c r="AP10" s="6">
        <v>3787.92233876584</v>
      </c>
      <c r="AQ10" s="6">
        <v>3666.52074452473</v>
      </c>
      <c r="AR10" s="6">
        <v>3706.461983468</v>
      </c>
      <c r="AS10" s="6">
        <v>3746.81937805166</v>
      </c>
      <c r="AT10" s="6">
        <v>3792.0995178347</v>
      </c>
      <c r="AU10" s="6">
        <v>3627.89814328306</v>
      </c>
      <c r="AV10" s="6">
        <v>2199.55503674418</v>
      </c>
      <c r="AW10" s="6">
        <v>2188.67159002178</v>
      </c>
      <c r="AX10" s="6">
        <v>2228.54105311976</v>
      </c>
      <c r="AY10" s="6">
        <v>3686.45096687767</v>
      </c>
      <c r="AZ10" s="6">
        <v>3696.3409638967</v>
      </c>
      <c r="BA10" s="6">
        <v>3665.21042717498</v>
      </c>
      <c r="BB10" s="6">
        <v>3699.67315816955</v>
      </c>
      <c r="BC10" s="6">
        <v>3612.13117299516</v>
      </c>
      <c r="BD10" s="6">
        <v>3620.1778707365</v>
      </c>
      <c r="BE10" s="6">
        <v>2696.26845299585</v>
      </c>
      <c r="BF10" s="6">
        <v>2745.99659564009</v>
      </c>
      <c r="BG10" s="6">
        <v>2256.0074845571</v>
      </c>
      <c r="BH10" s="6">
        <v>2181.78971288307</v>
      </c>
      <c r="BI10" s="6">
        <v>2201.12380840688</v>
      </c>
      <c r="BJ10" s="6">
        <v>2212.69216705985</v>
      </c>
      <c r="BK10" s="6">
        <v>3520.54201529994</v>
      </c>
      <c r="BL10" s="6">
        <v>3565.92058266449</v>
      </c>
      <c r="BM10" s="6">
        <v>3495.67318068089</v>
      </c>
      <c r="BN10" s="6">
        <v>3504.07535124205</v>
      </c>
      <c r="BO10" s="6">
        <v>3389.42087155325</v>
      </c>
      <c r="BP10" s="6">
        <v>3447.4505276909</v>
      </c>
      <c r="BQ10" s="6">
        <v>2364.15055437851</v>
      </c>
      <c r="BR10" s="6">
        <v>2251.69984694016</v>
      </c>
      <c r="BS10" s="6">
        <v>2685.1881032098</v>
      </c>
      <c r="BT10" s="6">
        <v>2193.99793091892</v>
      </c>
      <c r="BU10" s="6">
        <v>2209.43623638492</v>
      </c>
      <c r="BV10" s="6">
        <v>2200.03747458872</v>
      </c>
      <c r="BW10" s="6">
        <v>3657.29312358706</v>
      </c>
      <c r="BX10" s="6">
        <v>3695.06915034944</v>
      </c>
      <c r="BY10" s="6">
        <v>3618.40785454292</v>
      </c>
      <c r="BZ10" s="6">
        <v>3651.70357107044</v>
      </c>
      <c r="CA10" s="6">
        <v>3547.10052538883</v>
      </c>
      <c r="CB10" s="6">
        <v>3598.30139427516</v>
      </c>
      <c r="CC10" s="6">
        <v>2267.37110478059</v>
      </c>
      <c r="CD10" s="6">
        <v>2263.59928281762</v>
      </c>
      <c r="CE10" s="6">
        <v>2640.55364901565</v>
      </c>
      <c r="CF10" s="6">
        <v>2199.98503553366</v>
      </c>
      <c r="CG10" s="6">
        <v>2191.89325646961</v>
      </c>
      <c r="CH10" s="6">
        <v>2181.08523647861</v>
      </c>
      <c r="CI10" s="6">
        <v>3436.38103007553</v>
      </c>
      <c r="CJ10" s="6">
        <v>3561.88034026345</v>
      </c>
      <c r="CK10" s="6">
        <v>3366.08616846008</v>
      </c>
      <c r="CL10" s="6">
        <v>3455.70527777681</v>
      </c>
      <c r="CM10" s="6">
        <v>3407.76672606729</v>
      </c>
      <c r="CN10" s="6">
        <v>2983.85766078263</v>
      </c>
      <c r="CO10" s="6">
        <v>2238.43320616228</v>
      </c>
      <c r="CP10" s="6">
        <v>2509.72929046691</v>
      </c>
      <c r="CQ10" s="6">
        <v>2395.66278235604</v>
      </c>
      <c r="CR10" s="6">
        <v>2177.40668436531</v>
      </c>
      <c r="CS10" s="6">
        <v>2194.4527584881</v>
      </c>
      <c r="CT10" s="6">
        <v>2194.79823255278</v>
      </c>
    </row>
    <row r="11" spans="2:98" ht="15" customHeight="true">
      <c r="B11" s="6">
        <v>69.5</v>
      </c>
      <c r="C11" s="6">
        <v>3606.71951885498</v>
      </c>
      <c r="D11" s="6">
        <v>3513.5071977428</v>
      </c>
      <c r="E11" s="6">
        <v>3707.53905996118</v>
      </c>
      <c r="F11" s="6">
        <v>3632.00435824857</v>
      </c>
      <c r="G11" s="6">
        <v>3626.53583982969</v>
      </c>
      <c r="H11" s="6">
        <v>3738.36867998759</v>
      </c>
      <c r="I11" s="6">
        <v>3634.34322849358</v>
      </c>
      <c r="J11" s="6">
        <v>3661.16647216946</v>
      </c>
      <c r="K11" s="6">
        <v>3645.19862445029</v>
      </c>
      <c r="L11" s="6">
        <v>2244.80947552435</v>
      </c>
      <c r="M11" s="6">
        <v>2191.39294952655</v>
      </c>
      <c r="N11" s="6">
        <v>2200.19329010339</v>
      </c>
      <c r="O11" s="6">
        <v>3483.35297920422</v>
      </c>
      <c r="P11" s="6">
        <v>3705.28468866156</v>
      </c>
      <c r="Q11" s="6">
        <v>3637.55471479083</v>
      </c>
      <c r="R11" s="6">
        <v>3646.17778962209</v>
      </c>
      <c r="S11" s="6">
        <v>3607.49611579034</v>
      </c>
      <c r="T11" s="6">
        <v>3639.09441227944</v>
      </c>
      <c r="U11" s="6">
        <v>3642.39811116274</v>
      </c>
      <c r="V11" s="6">
        <v>3601.7676911139</v>
      </c>
      <c r="W11" s="6">
        <v>3623.78017936675</v>
      </c>
      <c r="X11" s="6">
        <v>2204.42875173264</v>
      </c>
      <c r="Y11" s="6">
        <v>2206.55767811243</v>
      </c>
      <c r="Z11" s="6">
        <v>2181.52421034245</v>
      </c>
      <c r="AA11" s="6">
        <v>3716.62374185151</v>
      </c>
      <c r="AB11" s="6">
        <v>3833.41589637207</v>
      </c>
      <c r="AC11" s="6">
        <v>3850.05298900281</v>
      </c>
      <c r="AD11" s="6">
        <v>3799.20369962518</v>
      </c>
      <c r="AE11" s="6">
        <v>3838.65441480354</v>
      </c>
      <c r="AF11" s="6">
        <v>3904.27573751518</v>
      </c>
      <c r="AG11" s="6">
        <v>3911.60487860432</v>
      </c>
      <c r="AH11" s="6">
        <v>3807.76049643388</v>
      </c>
      <c r="AI11" s="6">
        <v>3684.37853198144</v>
      </c>
      <c r="AJ11" s="6">
        <v>2204.74448889093</v>
      </c>
      <c r="AK11" s="6">
        <v>2221.59151768821</v>
      </c>
      <c r="AL11" s="6">
        <v>2213.86674845867</v>
      </c>
      <c r="AM11" s="6">
        <v>3533.32143055269</v>
      </c>
      <c r="AN11" s="6">
        <v>3692.56937576866</v>
      </c>
      <c r="AO11" s="6">
        <v>3657.16065426695</v>
      </c>
      <c r="AP11" s="6">
        <v>3774.72424949287</v>
      </c>
      <c r="AQ11" s="6">
        <v>3663.68174220048</v>
      </c>
      <c r="AR11" s="6">
        <v>3694.81070536698</v>
      </c>
      <c r="AS11" s="6">
        <v>3739.02081891401</v>
      </c>
      <c r="AT11" s="6">
        <v>3784.38204821657</v>
      </c>
      <c r="AU11" s="6">
        <v>3623.17255337298</v>
      </c>
      <c r="AV11" s="6">
        <v>2198.9893957426</v>
      </c>
      <c r="AW11" s="6">
        <v>2187.81947241056</v>
      </c>
      <c r="AX11" s="6">
        <v>2227.78073047042</v>
      </c>
      <c r="AY11" s="6">
        <v>3673.40459668119</v>
      </c>
      <c r="AZ11" s="6">
        <v>3682.05910698908</v>
      </c>
      <c r="BA11" s="6">
        <v>3647.65274664103</v>
      </c>
      <c r="BB11" s="6">
        <v>3681.96878473125</v>
      </c>
      <c r="BC11" s="6">
        <v>3594.48318181489</v>
      </c>
      <c r="BD11" s="6">
        <v>3607.45509164268</v>
      </c>
      <c r="BE11" s="6">
        <v>2687.31521773548</v>
      </c>
      <c r="BF11" s="6">
        <v>2736.96017682041</v>
      </c>
      <c r="BG11" s="6">
        <v>2254.71167574399</v>
      </c>
      <c r="BH11" s="6">
        <v>2180.6420211951</v>
      </c>
      <c r="BI11" s="6">
        <v>2200.68031381574</v>
      </c>
      <c r="BJ11" s="6">
        <v>2212.00012786563</v>
      </c>
      <c r="BK11" s="6">
        <v>3504.31312944238</v>
      </c>
      <c r="BL11" s="6">
        <v>3550.03965585936</v>
      </c>
      <c r="BM11" s="6">
        <v>3479.47983732193</v>
      </c>
      <c r="BN11" s="6">
        <v>3486.9402724745</v>
      </c>
      <c r="BO11" s="6">
        <v>3375.19256677842</v>
      </c>
      <c r="BP11" s="6">
        <v>3430.03444219887</v>
      </c>
      <c r="BQ11" s="6">
        <v>2360.13034466173</v>
      </c>
      <c r="BR11" s="6">
        <v>2251.27328442817</v>
      </c>
      <c r="BS11" s="6">
        <v>2675.07790957097</v>
      </c>
      <c r="BT11" s="6">
        <v>2193.74300326005</v>
      </c>
      <c r="BU11" s="6">
        <v>2208.36777171033</v>
      </c>
      <c r="BV11" s="6">
        <v>2199.40523024457</v>
      </c>
      <c r="BW11" s="6">
        <v>3644.21382883798</v>
      </c>
      <c r="BX11" s="6">
        <v>3677.42308289444</v>
      </c>
      <c r="BY11" s="6">
        <v>3605.57866702731</v>
      </c>
      <c r="BZ11" s="6">
        <v>3637.19663759254</v>
      </c>
      <c r="CA11" s="6">
        <v>3533.83993510729</v>
      </c>
      <c r="CB11" s="6">
        <v>3581.29690811296</v>
      </c>
      <c r="CC11" s="6">
        <v>2267.31623300023</v>
      </c>
      <c r="CD11" s="6">
        <v>2262.36143694204</v>
      </c>
      <c r="CE11" s="6">
        <v>2632.83017475122</v>
      </c>
      <c r="CF11" s="6">
        <v>2199.80957045313</v>
      </c>
      <c r="CG11" s="6">
        <v>2191.30017268576</v>
      </c>
      <c r="CH11" s="6">
        <v>2180.51090360446</v>
      </c>
      <c r="CI11" s="6">
        <v>3422.36205112824</v>
      </c>
      <c r="CJ11" s="6">
        <v>3546.81869576716</v>
      </c>
      <c r="CK11" s="6">
        <v>3352.11519186918</v>
      </c>
      <c r="CL11" s="6">
        <v>3437.67729863441</v>
      </c>
      <c r="CM11" s="6">
        <v>3390.01064592256</v>
      </c>
      <c r="CN11" s="6">
        <v>2961.71933239047</v>
      </c>
      <c r="CO11" s="6">
        <v>2237.60440987046</v>
      </c>
      <c r="CP11" s="6">
        <v>2504.77311193701</v>
      </c>
      <c r="CQ11" s="6">
        <v>2393.02900431688</v>
      </c>
      <c r="CR11" s="6">
        <v>2177.39529079021</v>
      </c>
      <c r="CS11" s="6">
        <v>2193.72947380024</v>
      </c>
      <c r="CT11" s="6">
        <v>2194.2489572867</v>
      </c>
    </row>
    <row r="12" spans="2:98" ht="15" customHeight="true">
      <c r="B12" s="6">
        <v>70</v>
      </c>
      <c r="C12" s="6">
        <v>3597.13245053944</v>
      </c>
      <c r="D12" s="6">
        <v>3512.74160716015</v>
      </c>
      <c r="E12" s="6">
        <v>3690.33652976204</v>
      </c>
      <c r="F12" s="6">
        <v>3623.77498489058</v>
      </c>
      <c r="G12" s="6">
        <v>3614.13665030496</v>
      </c>
      <c r="H12" s="6">
        <v>3734.43380285989</v>
      </c>
      <c r="I12" s="6">
        <v>3630.76543834422</v>
      </c>
      <c r="J12" s="6">
        <v>3651.47677876284</v>
      </c>
      <c r="K12" s="6">
        <v>3640.36448656074</v>
      </c>
      <c r="L12" s="6">
        <v>2243.9583689659</v>
      </c>
      <c r="M12" s="6">
        <v>2190.71562480269</v>
      </c>
      <c r="N12" s="6">
        <v>2199.5847942091</v>
      </c>
      <c r="O12" s="6">
        <v>3479.89784810955</v>
      </c>
      <c r="P12" s="6">
        <v>3699.62477423321</v>
      </c>
      <c r="Q12" s="6">
        <v>3622.30273242985</v>
      </c>
      <c r="R12" s="6">
        <v>3629.05484553002</v>
      </c>
      <c r="S12" s="6">
        <v>3589.88269206966</v>
      </c>
      <c r="T12" s="6">
        <v>3626.75227150261</v>
      </c>
      <c r="U12" s="6">
        <v>3625.13415166075</v>
      </c>
      <c r="V12" s="6">
        <v>3586.25799858965</v>
      </c>
      <c r="W12" s="6">
        <v>3614.88688301127</v>
      </c>
      <c r="X12" s="6">
        <v>2203.77759084919</v>
      </c>
      <c r="Y12" s="6">
        <v>2205.57139702101</v>
      </c>
      <c r="Z12" s="6">
        <v>2181.26837480826</v>
      </c>
      <c r="AA12" s="6">
        <v>3712.49401980109</v>
      </c>
      <c r="AB12" s="6">
        <v>3818.85208354865</v>
      </c>
      <c r="AC12" s="6">
        <v>3841.85706026179</v>
      </c>
      <c r="AD12" s="6">
        <v>3790.59182432735</v>
      </c>
      <c r="AE12" s="6">
        <v>3828.41644823584</v>
      </c>
      <c r="AF12" s="6">
        <v>3886.83831405271</v>
      </c>
      <c r="AG12" s="6">
        <v>3907.34235889975</v>
      </c>
      <c r="AH12" s="6">
        <v>3798.80629600579</v>
      </c>
      <c r="AI12" s="6">
        <v>3675.21384074955</v>
      </c>
      <c r="AJ12" s="6">
        <v>2204.21228768095</v>
      </c>
      <c r="AK12" s="6">
        <v>2220.9774348359</v>
      </c>
      <c r="AL12" s="6">
        <v>2213.22984569315</v>
      </c>
      <c r="AM12" s="6">
        <v>3526.01592841512</v>
      </c>
      <c r="AN12" s="6">
        <v>3682.63060484856</v>
      </c>
      <c r="AO12" s="6">
        <v>3639.72028963415</v>
      </c>
      <c r="AP12" s="6">
        <v>3756.18344733891</v>
      </c>
      <c r="AQ12" s="6">
        <v>3655.59767139844</v>
      </c>
      <c r="AR12" s="6">
        <v>3679.74079979058</v>
      </c>
      <c r="AS12" s="6">
        <v>3725.88133816886</v>
      </c>
      <c r="AT12" s="6">
        <v>3771.16107854889</v>
      </c>
      <c r="AU12" s="6">
        <v>3613.81301824373</v>
      </c>
      <c r="AV12" s="6">
        <v>2198.00070280076</v>
      </c>
      <c r="AW12" s="6">
        <v>2187.0770880769</v>
      </c>
      <c r="AX12" s="6">
        <v>2227.1061140487</v>
      </c>
      <c r="AY12" s="6">
        <v>3655.18034443289</v>
      </c>
      <c r="AZ12" s="6">
        <v>3663.04678792922</v>
      </c>
      <c r="BA12" s="6">
        <v>3625.50841939656</v>
      </c>
      <c r="BB12" s="6">
        <v>3658.87802869313</v>
      </c>
      <c r="BC12" s="6">
        <v>3572.75728480953</v>
      </c>
      <c r="BD12" s="6">
        <v>3589.36882309906</v>
      </c>
      <c r="BE12" s="6">
        <v>2675.03464270829</v>
      </c>
      <c r="BF12" s="6">
        <v>2724.17125004135</v>
      </c>
      <c r="BG12" s="6">
        <v>2253.42650400324</v>
      </c>
      <c r="BH12" s="6">
        <v>2179.404929053</v>
      </c>
      <c r="BI12" s="6">
        <v>2200.04501652098</v>
      </c>
      <c r="BJ12" s="6">
        <v>2211.37862985635</v>
      </c>
      <c r="BK12" s="6">
        <v>3483.67955636485</v>
      </c>
      <c r="BL12" s="6">
        <v>3530.30413273209</v>
      </c>
      <c r="BM12" s="6">
        <v>3458.74969258874</v>
      </c>
      <c r="BN12" s="6">
        <v>3465.55160857077</v>
      </c>
      <c r="BO12" s="6">
        <v>3357.11702907582</v>
      </c>
      <c r="BP12" s="6">
        <v>3408.6679374769</v>
      </c>
      <c r="BQ12" s="6">
        <v>2355.42671307382</v>
      </c>
      <c r="BR12" s="6">
        <v>2250.39797876642</v>
      </c>
      <c r="BS12" s="6">
        <v>2661.49951507582</v>
      </c>
      <c r="BT12" s="6">
        <v>2193.29736144991</v>
      </c>
      <c r="BU12" s="6">
        <v>2207.12015744327</v>
      </c>
      <c r="BV12" s="6">
        <v>2198.72700814368</v>
      </c>
      <c r="BW12" s="6">
        <v>3625.84970663709</v>
      </c>
      <c r="BX12" s="6">
        <v>3655.42059351012</v>
      </c>
      <c r="BY12" s="6">
        <v>3588.05564682334</v>
      </c>
      <c r="BZ12" s="6">
        <v>3617.09450966196</v>
      </c>
      <c r="CA12" s="6">
        <v>3515.29351527453</v>
      </c>
      <c r="CB12" s="6">
        <v>3559.88243099183</v>
      </c>
      <c r="CC12" s="6">
        <v>2266.65629566374</v>
      </c>
      <c r="CD12" s="6">
        <v>2261.15840586176</v>
      </c>
      <c r="CE12" s="6">
        <v>2622.80933199741</v>
      </c>
      <c r="CF12" s="6">
        <v>2199.84083014094</v>
      </c>
      <c r="CG12" s="6">
        <v>2190.58139716708</v>
      </c>
      <c r="CH12" s="6">
        <v>2179.59804668124</v>
      </c>
      <c r="CI12" s="6">
        <v>3404.6238491769</v>
      </c>
      <c r="CJ12" s="6">
        <v>3527.71141010189</v>
      </c>
      <c r="CK12" s="6">
        <v>3334.08399899676</v>
      </c>
      <c r="CL12" s="6">
        <v>3416.13791002347</v>
      </c>
      <c r="CM12" s="6">
        <v>3369.61000911133</v>
      </c>
      <c r="CN12" s="6">
        <v>2939.54571339556</v>
      </c>
      <c r="CO12" s="6">
        <v>2236.1841907822</v>
      </c>
      <c r="CP12" s="6">
        <v>2498.56030548116</v>
      </c>
      <c r="CQ12" s="6">
        <v>2389.46621382998</v>
      </c>
      <c r="CR12" s="6">
        <v>2176.69960967766</v>
      </c>
      <c r="CS12" s="6">
        <v>2193.14999725082</v>
      </c>
      <c r="CT12" s="6">
        <v>2193.96683460081</v>
      </c>
    </row>
    <row r="13" spans="2:98" ht="15" customHeight="true">
      <c r="B13" s="6">
        <v>70.5</v>
      </c>
      <c r="C13" s="6">
        <v>3583.21730425847</v>
      </c>
      <c r="D13" s="6">
        <v>3508.27112872015</v>
      </c>
      <c r="E13" s="6">
        <v>3668.95476430198</v>
      </c>
      <c r="F13" s="6">
        <v>3610.87624168209</v>
      </c>
      <c r="G13" s="6">
        <v>3596.79079572716</v>
      </c>
      <c r="H13" s="6">
        <v>3725.0347325037</v>
      </c>
      <c r="I13" s="6">
        <v>3622.14664431642</v>
      </c>
      <c r="J13" s="6">
        <v>3636.50614720846</v>
      </c>
      <c r="K13" s="6">
        <v>3629.61419120207</v>
      </c>
      <c r="L13" s="6">
        <v>2243.11019370721</v>
      </c>
      <c r="M13" s="6">
        <v>2189.66095883415</v>
      </c>
      <c r="N13" s="6">
        <v>2198.64297221381</v>
      </c>
      <c r="O13" s="6">
        <v>3472.44484895851</v>
      </c>
      <c r="P13" s="6">
        <v>3688.75718315455</v>
      </c>
      <c r="Q13" s="6">
        <v>3602.60401094427</v>
      </c>
      <c r="R13" s="6">
        <v>3607.95623107774</v>
      </c>
      <c r="S13" s="6">
        <v>3569.21073624888</v>
      </c>
      <c r="T13" s="6">
        <v>3610.52013339261</v>
      </c>
      <c r="U13" s="6">
        <v>3604.28992809819</v>
      </c>
      <c r="V13" s="6">
        <v>3566.78249514611</v>
      </c>
      <c r="W13" s="6">
        <v>3600.54181148229</v>
      </c>
      <c r="X13" s="6">
        <v>2202.98247673199</v>
      </c>
      <c r="Y13" s="6">
        <v>2204.4773372714</v>
      </c>
      <c r="Z13" s="6">
        <v>2180.8559232921</v>
      </c>
      <c r="AA13" s="6">
        <v>3703.29709540551</v>
      </c>
      <c r="AB13" s="6">
        <v>3799.1958323387</v>
      </c>
      <c r="AC13" s="6">
        <v>3827.62766898145</v>
      </c>
      <c r="AD13" s="6">
        <v>3776.13111807817</v>
      </c>
      <c r="AE13" s="6">
        <v>3812.0664061015</v>
      </c>
      <c r="AF13" s="6">
        <v>3865.13986686085</v>
      </c>
      <c r="AG13" s="6">
        <v>3893.29300581133</v>
      </c>
      <c r="AH13" s="6">
        <v>3784.1554374129</v>
      </c>
      <c r="AI13" s="6">
        <v>3659.78300059792</v>
      </c>
      <c r="AJ13" s="6">
        <v>2203.47369356647</v>
      </c>
      <c r="AK13" s="6">
        <v>2220.03479177069</v>
      </c>
      <c r="AL13" s="6">
        <v>2212.30101108533</v>
      </c>
      <c r="AM13" s="6">
        <v>3513.78980413548</v>
      </c>
      <c r="AN13" s="6">
        <v>3667.99570606995</v>
      </c>
      <c r="AO13" s="6">
        <v>3619.04054641808</v>
      </c>
      <c r="AP13" s="6">
        <v>3733.14880628979</v>
      </c>
      <c r="AQ13" s="6">
        <v>3641.18865916322</v>
      </c>
      <c r="AR13" s="6">
        <v>3661.31649139988</v>
      </c>
      <c r="AS13" s="6">
        <v>3708.09048855718</v>
      </c>
      <c r="AT13" s="6">
        <v>3753.03225377343</v>
      </c>
      <c r="AU13" s="6">
        <v>3598.84025936112</v>
      </c>
      <c r="AV13" s="6">
        <v>2196.99128253576</v>
      </c>
      <c r="AW13" s="6">
        <v>2186.68525649133</v>
      </c>
      <c r="AX13" s="6">
        <v>2226.15532960653</v>
      </c>
      <c r="AY13" s="6">
        <v>3632.48917899966</v>
      </c>
      <c r="AZ13" s="6">
        <v>3640.13655758033</v>
      </c>
      <c r="BA13" s="6">
        <v>3599.32479057368</v>
      </c>
      <c r="BB13" s="6">
        <v>3632.1466021328</v>
      </c>
      <c r="BC13" s="6">
        <v>3547.68487436043</v>
      </c>
      <c r="BD13" s="6">
        <v>3566.52151065781</v>
      </c>
      <c r="BE13" s="6">
        <v>2659.38380237784</v>
      </c>
      <c r="BF13" s="6">
        <v>2705.30905388481</v>
      </c>
      <c r="BG13" s="6">
        <v>2251.84530545272</v>
      </c>
      <c r="BH13" s="6">
        <v>2178.64635239762</v>
      </c>
      <c r="BI13" s="6">
        <v>2199.19387629675</v>
      </c>
      <c r="BJ13" s="6">
        <v>2210.5507010247</v>
      </c>
      <c r="BK13" s="6">
        <v>3459.38102053082</v>
      </c>
      <c r="BL13" s="6">
        <v>3506.98483826421</v>
      </c>
      <c r="BM13" s="6">
        <v>3434.77679199989</v>
      </c>
      <c r="BN13" s="6">
        <v>3440.90139207652</v>
      </c>
      <c r="BO13" s="6">
        <v>3335.7927706722</v>
      </c>
      <c r="BP13" s="6">
        <v>3384.67495247248</v>
      </c>
      <c r="BQ13" s="6">
        <v>2349.31407451062</v>
      </c>
      <c r="BR13" s="6">
        <v>2248.82918072843</v>
      </c>
      <c r="BS13" s="6">
        <v>2643.15256362971</v>
      </c>
      <c r="BT13" s="6">
        <v>2192.65005119023</v>
      </c>
      <c r="BU13" s="6">
        <v>2205.81143519443</v>
      </c>
      <c r="BV13" s="6">
        <v>2197.7050312395</v>
      </c>
      <c r="BW13" s="6">
        <v>3602.78114968741</v>
      </c>
      <c r="BX13" s="6">
        <v>3630.88057064541</v>
      </c>
      <c r="BY13" s="6">
        <v>3566.45424579625</v>
      </c>
      <c r="BZ13" s="6">
        <v>3592.34620295941</v>
      </c>
      <c r="CA13" s="6">
        <v>3492.69922764888</v>
      </c>
      <c r="CB13" s="6">
        <v>3535.42706547438</v>
      </c>
      <c r="CC13" s="6">
        <v>2265.45435673139</v>
      </c>
      <c r="CD13" s="6">
        <v>2259.33943137468</v>
      </c>
      <c r="CE13" s="6">
        <v>2610.13803278105</v>
      </c>
      <c r="CF13" s="6">
        <v>2199.86863871087</v>
      </c>
      <c r="CG13" s="6">
        <v>2189.96714893847</v>
      </c>
      <c r="CH13" s="6">
        <v>2178.96287957559</v>
      </c>
      <c r="CI13" s="6">
        <v>3384.1219840023</v>
      </c>
      <c r="CJ13" s="6">
        <v>3505.11308954137</v>
      </c>
      <c r="CK13" s="6">
        <v>3313.42716442428</v>
      </c>
      <c r="CL13" s="6">
        <v>3391.90546539875</v>
      </c>
      <c r="CM13" s="6">
        <v>3347.14916137595</v>
      </c>
      <c r="CN13" s="6">
        <v>2917.06330193131</v>
      </c>
      <c r="CO13" s="6">
        <v>2234.7793992474</v>
      </c>
      <c r="CP13" s="6">
        <v>2490.39089802446</v>
      </c>
      <c r="CQ13" s="6">
        <v>2384.68978556043</v>
      </c>
      <c r="CR13" s="6">
        <v>2176.06281298136</v>
      </c>
      <c r="CS13" s="6">
        <v>2192.78995080331</v>
      </c>
      <c r="CT13" s="6">
        <v>2193.86320726252</v>
      </c>
    </row>
    <row r="14" spans="2:98" ht="15" customHeight="true">
      <c r="B14" s="6">
        <v>71</v>
      </c>
      <c r="C14" s="6">
        <v>3565.53130665374</v>
      </c>
      <c r="D14" s="6">
        <v>3499.45618917576</v>
      </c>
      <c r="E14" s="6">
        <v>3645.06423926093</v>
      </c>
      <c r="F14" s="6">
        <v>3592.63505007848</v>
      </c>
      <c r="G14" s="6">
        <v>3575.26630486485</v>
      </c>
      <c r="H14" s="6">
        <v>3709.91687928617</v>
      </c>
      <c r="I14" s="6">
        <v>3607.8441528735</v>
      </c>
      <c r="J14" s="6">
        <v>3616.64080356192</v>
      </c>
      <c r="K14" s="6">
        <v>3613.35449646513</v>
      </c>
      <c r="L14" s="6">
        <v>2242.14334197103</v>
      </c>
      <c r="M14" s="6">
        <v>2188.66226484148</v>
      </c>
      <c r="N14" s="6">
        <v>2198.12774745992</v>
      </c>
      <c r="O14" s="6">
        <v>3460.76085956639</v>
      </c>
      <c r="P14" s="6">
        <v>3673.03554884048</v>
      </c>
      <c r="Q14" s="6">
        <v>3580.02309213342</v>
      </c>
      <c r="R14" s="6">
        <v>3583.53452247103</v>
      </c>
      <c r="S14" s="6">
        <v>3546.22193960267</v>
      </c>
      <c r="T14" s="6">
        <v>3591.12554534313</v>
      </c>
      <c r="U14" s="6">
        <v>3581.26727712604</v>
      </c>
      <c r="V14" s="6">
        <v>3544.74148356936</v>
      </c>
      <c r="W14" s="6">
        <v>3581.17156738347</v>
      </c>
      <c r="X14" s="6">
        <v>2202.2821391084</v>
      </c>
      <c r="Y14" s="6">
        <v>2203.37309816342</v>
      </c>
      <c r="Z14" s="6">
        <v>2180.28171658104</v>
      </c>
      <c r="AA14" s="6">
        <v>3688.80825645595</v>
      </c>
      <c r="AB14" s="6">
        <v>3775.60737126848</v>
      </c>
      <c r="AC14" s="6">
        <v>3807.59262123669</v>
      </c>
      <c r="AD14" s="6">
        <v>3755.92785310106</v>
      </c>
      <c r="AE14" s="6">
        <v>3790.04506651526</v>
      </c>
      <c r="AF14" s="6">
        <v>3840.16731032793</v>
      </c>
      <c r="AG14" s="6">
        <v>3871.42772555548</v>
      </c>
      <c r="AH14" s="6">
        <v>3763.5164985746</v>
      </c>
      <c r="AI14" s="6">
        <v>3638.90222769289</v>
      </c>
      <c r="AJ14" s="6">
        <v>2203.28187331173</v>
      </c>
      <c r="AK14" s="6">
        <v>2219.17430364067</v>
      </c>
      <c r="AL14" s="6">
        <v>2211.49109712965</v>
      </c>
      <c r="AM14" s="6">
        <v>3496.55101084249</v>
      </c>
      <c r="AN14" s="6">
        <v>3649.60507395348</v>
      </c>
      <c r="AO14" s="6">
        <v>3595.90604397818</v>
      </c>
      <c r="AP14" s="6">
        <v>3706.98043624696</v>
      </c>
      <c r="AQ14" s="6">
        <v>3621.03336506757</v>
      </c>
      <c r="AR14" s="6">
        <v>3639.67790992248</v>
      </c>
      <c r="AS14" s="6">
        <v>3685.87706685457</v>
      </c>
      <c r="AT14" s="6">
        <v>3731.59033444258</v>
      </c>
      <c r="AU14" s="6">
        <v>3579.67244505687</v>
      </c>
      <c r="AV14" s="6">
        <v>2195.93452537168</v>
      </c>
      <c r="AW14" s="6">
        <v>2186.60684484228</v>
      </c>
      <c r="AX14" s="6">
        <v>2225.32542819785</v>
      </c>
      <c r="AY14" s="6">
        <v>3606.79647337373</v>
      </c>
      <c r="AZ14" s="6">
        <v>3614.22168649251</v>
      </c>
      <c r="BA14" s="6">
        <v>3571.13255061338</v>
      </c>
      <c r="BB14" s="6">
        <v>3603.13812626999</v>
      </c>
      <c r="BC14" s="6">
        <v>3520.30711396726</v>
      </c>
      <c r="BD14" s="6">
        <v>3539.82584905257</v>
      </c>
      <c r="BE14" s="6">
        <v>2640.53491839183</v>
      </c>
      <c r="BF14" s="6">
        <v>2679.1813098129</v>
      </c>
      <c r="BG14" s="6">
        <v>2250.32166137034</v>
      </c>
      <c r="BH14" s="6">
        <v>2178.36324373701</v>
      </c>
      <c r="BI14" s="6">
        <v>2198.31793405867</v>
      </c>
      <c r="BJ14" s="6">
        <v>2209.68382984686</v>
      </c>
      <c r="BK14" s="6">
        <v>3433.17561525303</v>
      </c>
      <c r="BL14" s="6">
        <v>3481.8004638774</v>
      </c>
      <c r="BM14" s="6">
        <v>3408.70663879817</v>
      </c>
      <c r="BN14" s="6">
        <v>3414.46129872423</v>
      </c>
      <c r="BO14" s="6">
        <v>3312.17406186066</v>
      </c>
      <c r="BP14" s="6">
        <v>3358.98074142657</v>
      </c>
      <c r="BQ14" s="6">
        <v>2341.51005876256</v>
      </c>
      <c r="BR14" s="6">
        <v>2246.70484428601</v>
      </c>
      <c r="BS14" s="6">
        <v>2618.48643037294</v>
      </c>
      <c r="BT14" s="6">
        <v>2191.72985974257</v>
      </c>
      <c r="BU14" s="6">
        <v>2204.6965053186</v>
      </c>
      <c r="BV14" s="6">
        <v>2196.54283431126</v>
      </c>
      <c r="BW14" s="6">
        <v>3576.67228675902</v>
      </c>
      <c r="BX14" s="6">
        <v>3604.26419903258</v>
      </c>
      <c r="BY14" s="6">
        <v>3541.73170845288</v>
      </c>
      <c r="BZ14" s="6">
        <v>3563.80264791809</v>
      </c>
      <c r="CA14" s="6">
        <v>3467.20892961933</v>
      </c>
      <c r="CB14" s="6">
        <v>3509.90898197746</v>
      </c>
      <c r="CC14" s="6">
        <v>2264.14575761467</v>
      </c>
      <c r="CD14" s="6">
        <v>2257.49307683207</v>
      </c>
      <c r="CE14" s="6">
        <v>2594.39856853877</v>
      </c>
      <c r="CF14" s="6">
        <v>2199.35927957549</v>
      </c>
      <c r="CG14" s="6">
        <v>2189.26361586269</v>
      </c>
      <c r="CH14" s="6">
        <v>2178.27194184919</v>
      </c>
      <c r="CI14" s="6">
        <v>3361.82578380731</v>
      </c>
      <c r="CJ14" s="6">
        <v>3480.34299010755</v>
      </c>
      <c r="CK14" s="6">
        <v>3290.60430480426</v>
      </c>
      <c r="CL14" s="6">
        <v>3366.49141076342</v>
      </c>
      <c r="CM14" s="6">
        <v>3323.29176727925</v>
      </c>
      <c r="CN14" s="6">
        <v>2894.38670792103</v>
      </c>
      <c r="CO14" s="6">
        <v>2233.11224882005</v>
      </c>
      <c r="CP14" s="6">
        <v>2481.54670285682</v>
      </c>
      <c r="CQ14" s="6">
        <v>2379.49640710512</v>
      </c>
      <c r="CR14" s="6">
        <v>2175.71528640398</v>
      </c>
      <c r="CS14" s="6">
        <v>2192.19372028331</v>
      </c>
      <c r="CT14" s="6">
        <v>2193.58738199322</v>
      </c>
    </row>
    <row r="15" spans="2:98" ht="15" customHeight="true">
      <c r="B15" s="6">
        <v>71.5</v>
      </c>
      <c r="C15" s="6">
        <v>3545.16791226972</v>
      </c>
      <c r="D15" s="6">
        <v>3486.28793499214</v>
      </c>
      <c r="E15" s="6">
        <v>3619.49733138738</v>
      </c>
      <c r="F15" s="6">
        <v>3569.87662985521</v>
      </c>
      <c r="G15" s="6">
        <v>3551.62468847279</v>
      </c>
      <c r="H15" s="6">
        <v>3689.99986335603</v>
      </c>
      <c r="I15" s="6">
        <v>3588.98160197358</v>
      </c>
      <c r="J15" s="6">
        <v>3593.85279059673</v>
      </c>
      <c r="K15" s="6">
        <v>3592.31515179574</v>
      </c>
      <c r="L15" s="6">
        <v>2241.3096716638</v>
      </c>
      <c r="M15" s="6">
        <v>2188.03895383044</v>
      </c>
      <c r="N15" s="6">
        <v>2197.91035752718</v>
      </c>
      <c r="O15" s="6">
        <v>3445.13389023498</v>
      </c>
      <c r="P15" s="6">
        <v>3652.75077130321</v>
      </c>
      <c r="Q15" s="6">
        <v>3555.1385329468</v>
      </c>
      <c r="R15" s="6">
        <v>3557.13595508624</v>
      </c>
      <c r="S15" s="6">
        <v>3522.37426897082</v>
      </c>
      <c r="T15" s="6">
        <v>3569.2440384466</v>
      </c>
      <c r="U15" s="6">
        <v>3556.84401559705</v>
      </c>
      <c r="V15" s="6">
        <v>3521.33537177998</v>
      </c>
      <c r="W15" s="6">
        <v>3558.01029131957</v>
      </c>
      <c r="X15" s="6">
        <v>2201.33422713155</v>
      </c>
      <c r="Y15" s="6">
        <v>2202.27824980844</v>
      </c>
      <c r="Z15" s="6">
        <v>2179.53495791719</v>
      </c>
      <c r="AA15" s="6">
        <v>3669.50242845599</v>
      </c>
      <c r="AB15" s="6">
        <v>3749.88817486085</v>
      </c>
      <c r="AC15" s="6">
        <v>3783.14675263655</v>
      </c>
      <c r="AD15" s="6">
        <v>3731.03173258222</v>
      </c>
      <c r="AE15" s="6">
        <v>3763.8993213111</v>
      </c>
      <c r="AF15" s="6">
        <v>3813.738502695</v>
      </c>
      <c r="AG15" s="6">
        <v>3843.51699010042</v>
      </c>
      <c r="AH15" s="6">
        <v>3738.94556964836</v>
      </c>
      <c r="AI15" s="6">
        <v>3613.93630835832</v>
      </c>
      <c r="AJ15" s="6">
        <v>2203.29860368401</v>
      </c>
      <c r="AK15" s="6">
        <v>2217.82974433284</v>
      </c>
      <c r="AL15" s="6">
        <v>2210.75247721895</v>
      </c>
      <c r="AM15" s="6">
        <v>3475.7083208925</v>
      </c>
      <c r="AN15" s="6">
        <v>3628.35715705435</v>
      </c>
      <c r="AO15" s="6">
        <v>3571.74065607312</v>
      </c>
      <c r="AP15" s="6">
        <v>3678.85574746118</v>
      </c>
      <c r="AQ15" s="6">
        <v>3597.20346772904</v>
      </c>
      <c r="AR15" s="6">
        <v>3616.54686077444</v>
      </c>
      <c r="AS15" s="6">
        <v>3661.24824005574</v>
      </c>
      <c r="AT15" s="6">
        <v>3707.58178557798</v>
      </c>
      <c r="AU15" s="6">
        <v>3556.98931937647</v>
      </c>
      <c r="AV15" s="6">
        <v>2194.95013486071</v>
      </c>
      <c r="AW15" s="6">
        <v>2186.57196268213</v>
      </c>
      <c r="AX15" s="6">
        <v>2224.76135581122</v>
      </c>
      <c r="AY15" s="6">
        <v>3578.57807857676</v>
      </c>
      <c r="AZ15" s="6">
        <v>3585.82464813592</v>
      </c>
      <c r="BA15" s="6">
        <v>3541.63295200136</v>
      </c>
      <c r="BB15" s="6">
        <v>3572.53242419274</v>
      </c>
      <c r="BC15" s="6">
        <v>3491.40067844462</v>
      </c>
      <c r="BD15" s="6">
        <v>3510.8201290706</v>
      </c>
      <c r="BE15" s="6">
        <v>2618.16054506667</v>
      </c>
      <c r="BF15" s="6">
        <v>2644.37925127977</v>
      </c>
      <c r="BG15" s="6">
        <v>2248.62822022516</v>
      </c>
      <c r="BH15" s="6">
        <v>2178.10685023476</v>
      </c>
      <c r="BI15" s="6">
        <v>2197.61034926426</v>
      </c>
      <c r="BJ15" s="6">
        <v>2208.72984587004</v>
      </c>
      <c r="BK15" s="6">
        <v>3406.12731518135</v>
      </c>
      <c r="BL15" s="6">
        <v>3456.23659983864</v>
      </c>
      <c r="BM15" s="6">
        <v>3381.92887656386</v>
      </c>
      <c r="BN15" s="6">
        <v>3387.2679582412</v>
      </c>
      <c r="BO15" s="6">
        <v>3287.6331106812</v>
      </c>
      <c r="BP15" s="6">
        <v>3332.40018050887</v>
      </c>
      <c r="BQ15" s="6">
        <v>2331.65275982968</v>
      </c>
      <c r="BR15" s="6">
        <v>2244.51394907965</v>
      </c>
      <c r="BS15" s="6">
        <v>2586.01168080351</v>
      </c>
      <c r="BT15" s="6">
        <v>2191.09170858716</v>
      </c>
      <c r="BU15" s="6">
        <v>2203.92506243284</v>
      </c>
      <c r="BV15" s="6">
        <v>2195.74497958877</v>
      </c>
      <c r="BW15" s="6">
        <v>3548.06551890841</v>
      </c>
      <c r="BX15" s="6">
        <v>3576.7000577875</v>
      </c>
      <c r="BY15" s="6">
        <v>3515.20183417994</v>
      </c>
      <c r="BZ15" s="6">
        <v>3533.01302839581</v>
      </c>
      <c r="CA15" s="6">
        <v>3439.67058068394</v>
      </c>
      <c r="CB15" s="6">
        <v>3483.48604737158</v>
      </c>
      <c r="CC15" s="6">
        <v>2262.36257645824</v>
      </c>
      <c r="CD15" s="6">
        <v>2254.97135814743</v>
      </c>
      <c r="CE15" s="6">
        <v>2575.21100379204</v>
      </c>
      <c r="CF15" s="6">
        <v>2198.83785545673</v>
      </c>
      <c r="CG15" s="6">
        <v>2188.84159210118</v>
      </c>
      <c r="CH15" s="6">
        <v>2177.34188126258</v>
      </c>
      <c r="CI15" s="6">
        <v>3338.32831356546</v>
      </c>
      <c r="CJ15" s="6">
        <v>3454.36919934813</v>
      </c>
      <c r="CK15" s="6">
        <v>3266.79727786</v>
      </c>
      <c r="CL15" s="6">
        <v>3340.21933048357</v>
      </c>
      <c r="CM15" s="6">
        <v>3298.57199409913</v>
      </c>
      <c r="CN15" s="6">
        <v>2870.87114843954</v>
      </c>
      <c r="CO15" s="6">
        <v>2231.5484416952</v>
      </c>
      <c r="CP15" s="6">
        <v>2472.39456862594</v>
      </c>
      <c r="CQ15" s="6">
        <v>2373.79978929389</v>
      </c>
      <c r="CR15" s="6">
        <v>2175.21881810992</v>
      </c>
      <c r="CS15" s="6">
        <v>2191.80038931559</v>
      </c>
      <c r="CT15" s="6">
        <v>2193.08606338668</v>
      </c>
    </row>
    <row r="16" spans="2:98" ht="15" customHeight="true">
      <c r="B16" s="6">
        <v>72</v>
      </c>
      <c r="C16" s="6">
        <v>3523.22927334575</v>
      </c>
      <c r="D16" s="6">
        <v>3469.10261715984</v>
      </c>
      <c r="E16" s="6">
        <v>3592.54227774502</v>
      </c>
      <c r="F16" s="6">
        <v>3543.96430327094</v>
      </c>
      <c r="G16" s="6">
        <v>3526.82486153838</v>
      </c>
      <c r="H16" s="6">
        <v>3665.90397047767</v>
      </c>
      <c r="I16" s="6">
        <v>3566.10861833456</v>
      </c>
      <c r="J16" s="6">
        <v>3568.69847955046</v>
      </c>
      <c r="K16" s="6">
        <v>3567.03269285837</v>
      </c>
      <c r="L16" s="6">
        <v>2240.58531217613</v>
      </c>
      <c r="M16" s="6">
        <v>2187.46678685358</v>
      </c>
      <c r="N16" s="6">
        <v>2198.13673159986</v>
      </c>
      <c r="O16" s="6">
        <v>3426.46896958089</v>
      </c>
      <c r="P16" s="6">
        <v>3629.26819340965</v>
      </c>
      <c r="Q16" s="6">
        <v>3529.36334528932</v>
      </c>
      <c r="R16" s="6">
        <v>3530.20553625598</v>
      </c>
      <c r="S16" s="6">
        <v>3498.32814083785</v>
      </c>
      <c r="T16" s="6">
        <v>3545.73866185381</v>
      </c>
      <c r="U16" s="6">
        <v>3531.96587478337</v>
      </c>
      <c r="V16" s="6">
        <v>3497.01396606175</v>
      </c>
      <c r="W16" s="6">
        <v>3532.70863054477</v>
      </c>
      <c r="X16" s="6">
        <v>2200.4956005312</v>
      </c>
      <c r="Y16" s="6">
        <v>2201.51814824319</v>
      </c>
      <c r="Z16" s="6">
        <v>2179.13504828001</v>
      </c>
      <c r="AA16" s="6">
        <v>3646.12111306345</v>
      </c>
      <c r="AB16" s="6">
        <v>3722.88966809324</v>
      </c>
      <c r="AC16" s="6">
        <v>3755.27781027326</v>
      </c>
      <c r="AD16" s="6">
        <v>3702.48401477995</v>
      </c>
      <c r="AE16" s="6">
        <v>3734.99663400041</v>
      </c>
      <c r="AF16" s="6">
        <v>3786.45826195409</v>
      </c>
      <c r="AG16" s="6">
        <v>3811.62106437175</v>
      </c>
      <c r="AH16" s="6">
        <v>3711.26050572408</v>
      </c>
      <c r="AI16" s="6">
        <v>3586.44473891586</v>
      </c>
      <c r="AJ16" s="6">
        <v>2203.18764342364</v>
      </c>
      <c r="AK16" s="6">
        <v>2216.72358383513</v>
      </c>
      <c r="AL16" s="6">
        <v>2210.14317021436</v>
      </c>
      <c r="AM16" s="6">
        <v>3452.41625871286</v>
      </c>
      <c r="AN16" s="6">
        <v>3605.62420508435</v>
      </c>
      <c r="AO16" s="6">
        <v>3547.07686415999</v>
      </c>
      <c r="AP16" s="6">
        <v>3650.3303209718</v>
      </c>
      <c r="AQ16" s="6">
        <v>3570.91755095955</v>
      </c>
      <c r="AR16" s="6">
        <v>3592.72689719537</v>
      </c>
      <c r="AS16" s="6">
        <v>3634.92530614636</v>
      </c>
      <c r="AT16" s="6">
        <v>3682.08362794526</v>
      </c>
      <c r="AU16" s="6">
        <v>3531.53875027403</v>
      </c>
      <c r="AV16" s="6">
        <v>2194.19571337972</v>
      </c>
      <c r="AW16" s="6">
        <v>2186.4115235126</v>
      </c>
      <c r="AX16" s="6">
        <v>2224.42411221373</v>
      </c>
      <c r="AY16" s="6">
        <v>3548.99475005274</v>
      </c>
      <c r="AZ16" s="6">
        <v>3555.61509152002</v>
      </c>
      <c r="BA16" s="6">
        <v>3511.46866884014</v>
      </c>
      <c r="BB16" s="6">
        <v>3541.31928986092</v>
      </c>
      <c r="BC16" s="6">
        <v>3461.56743696921</v>
      </c>
      <c r="BD16" s="6">
        <v>3480.23887648266</v>
      </c>
      <c r="BE16" s="6">
        <v>2592.8798058852</v>
      </c>
      <c r="BF16" s="6">
        <v>2600.76388753125</v>
      </c>
      <c r="BG16" s="6">
        <v>2246.93879083306</v>
      </c>
      <c r="BH16" s="6">
        <v>2178.06464707618</v>
      </c>
      <c r="BI16" s="6">
        <v>2197.3203872115</v>
      </c>
      <c r="BJ16" s="6">
        <v>2208.06181742363</v>
      </c>
      <c r="BK16" s="6">
        <v>3379.07229324709</v>
      </c>
      <c r="BL16" s="6">
        <v>3430.49233637007</v>
      </c>
      <c r="BM16" s="6">
        <v>3354.51048245955</v>
      </c>
      <c r="BN16" s="6">
        <v>3359.99088544204</v>
      </c>
      <c r="BO16" s="6">
        <v>3262.89132179967</v>
      </c>
      <c r="BP16" s="6">
        <v>3305.57069536466</v>
      </c>
      <c r="BQ16" s="6">
        <v>2319.61936485717</v>
      </c>
      <c r="BR16" s="6">
        <v>2242.2158144391</v>
      </c>
      <c r="BS16" s="6">
        <v>2546.05273610037</v>
      </c>
      <c r="BT16" s="6">
        <v>2190.42392092072</v>
      </c>
      <c r="BU16" s="6">
        <v>2203.63113697751</v>
      </c>
      <c r="BV16" s="6">
        <v>2194.92704630993</v>
      </c>
      <c r="BW16" s="6">
        <v>3518.48759558545</v>
      </c>
      <c r="BX16" s="6">
        <v>3548.85176769012</v>
      </c>
      <c r="BY16" s="6">
        <v>3487.24087931753</v>
      </c>
      <c r="BZ16" s="6">
        <v>3500.89920251515</v>
      </c>
      <c r="CA16" s="6">
        <v>3410.99813958731</v>
      </c>
      <c r="CB16" s="6">
        <v>3457.01282419096</v>
      </c>
      <c r="CC16" s="6">
        <v>2260.50467096678</v>
      </c>
      <c r="CD16" s="6">
        <v>2252.48198051617</v>
      </c>
      <c r="CE16" s="6">
        <v>2553.37125640943</v>
      </c>
      <c r="CF16" s="6">
        <v>2198.15258459812</v>
      </c>
      <c r="CG16" s="6">
        <v>2188.68619003336</v>
      </c>
      <c r="CH16" s="6">
        <v>2176.34497288381</v>
      </c>
      <c r="CI16" s="6">
        <v>3314.28483132348</v>
      </c>
      <c r="CJ16" s="6">
        <v>3428.09968583257</v>
      </c>
      <c r="CK16" s="6">
        <v>3242.45388705717</v>
      </c>
      <c r="CL16" s="6">
        <v>3313.5205866475</v>
      </c>
      <c r="CM16" s="6">
        <v>3273.66093328709</v>
      </c>
      <c r="CN16" s="6">
        <v>2846.56175633453</v>
      </c>
      <c r="CO16" s="6">
        <v>2230.27487504066</v>
      </c>
      <c r="CP16" s="6">
        <v>2462.74393176454</v>
      </c>
      <c r="CQ16" s="6">
        <v>2368.14924293011</v>
      </c>
      <c r="CR16" s="6">
        <v>2175.17774081727</v>
      </c>
      <c r="CS16" s="6">
        <v>2191.94734590123</v>
      </c>
      <c r="CT16" s="6">
        <v>2192.91272398632</v>
      </c>
    </row>
    <row r="17" spans="2:98" ht="15" customHeight="true">
      <c r="B17" s="6">
        <v>72.5</v>
      </c>
      <c r="C17" s="6">
        <v>3500.03308880934</v>
      </c>
      <c r="D17" s="6">
        <v>3448.98676487616</v>
      </c>
      <c r="E17" s="6">
        <v>3565.0925412611</v>
      </c>
      <c r="F17" s="6">
        <v>3516.03184341242</v>
      </c>
      <c r="G17" s="6">
        <v>3501.49869384932</v>
      </c>
      <c r="H17" s="6">
        <v>3639.5684599039</v>
      </c>
      <c r="I17" s="6">
        <v>3540.92778366633</v>
      </c>
      <c r="J17" s="6">
        <v>3542.56843871608</v>
      </c>
      <c r="K17" s="6">
        <v>3540.0812327389</v>
      </c>
      <c r="L17" s="6">
        <v>2239.60347666563</v>
      </c>
      <c r="M17" s="6">
        <v>2187.07178881</v>
      </c>
      <c r="N17" s="6">
        <v>2198.13974553669</v>
      </c>
      <c r="O17" s="6">
        <v>3405.43783921803</v>
      </c>
      <c r="P17" s="6">
        <v>3604.0194637596</v>
      </c>
      <c r="Q17" s="6">
        <v>3503.30567992377</v>
      </c>
      <c r="R17" s="6">
        <v>3503.44889941529</v>
      </c>
      <c r="S17" s="6">
        <v>3473.83903489541</v>
      </c>
      <c r="T17" s="6">
        <v>3521.98411965768</v>
      </c>
      <c r="U17" s="6">
        <v>3506.59348646984</v>
      </c>
      <c r="V17" s="6">
        <v>3472.62083711494</v>
      </c>
      <c r="W17" s="6">
        <v>3506.06421724423</v>
      </c>
      <c r="X17" s="6">
        <v>2199.59044345672</v>
      </c>
      <c r="Y17" s="6">
        <v>2200.91543761684</v>
      </c>
      <c r="Z17" s="6">
        <v>2178.40536346884</v>
      </c>
      <c r="AA17" s="6">
        <v>3619.91553475358</v>
      </c>
      <c r="AB17" s="6">
        <v>3695.92534291831</v>
      </c>
      <c r="AC17" s="6">
        <v>3725.59847361289</v>
      </c>
      <c r="AD17" s="6">
        <v>3671.69601303914</v>
      </c>
      <c r="AE17" s="6">
        <v>3704.77382367763</v>
      </c>
      <c r="AF17" s="6">
        <v>3758.7597262334</v>
      </c>
      <c r="AG17" s="6">
        <v>3778.73077328895</v>
      </c>
      <c r="AH17" s="6">
        <v>3681.70475106182</v>
      </c>
      <c r="AI17" s="6">
        <v>3557.62985516701</v>
      </c>
      <c r="AJ17" s="6">
        <v>2203.365669409</v>
      </c>
      <c r="AK17" s="6">
        <v>2215.81672024682</v>
      </c>
      <c r="AL17" s="6">
        <v>2209.38018019232</v>
      </c>
      <c r="AM17" s="6">
        <v>3428.34699068225</v>
      </c>
      <c r="AN17" s="6">
        <v>3581.86131130458</v>
      </c>
      <c r="AO17" s="6">
        <v>3521.97737428742</v>
      </c>
      <c r="AP17" s="6">
        <v>3621.73859590173</v>
      </c>
      <c r="AQ17" s="6">
        <v>3543.1184638368</v>
      </c>
      <c r="AR17" s="6">
        <v>3567.84254201949</v>
      </c>
      <c r="AS17" s="6">
        <v>3607.95340655871</v>
      </c>
      <c r="AT17" s="6">
        <v>3656.1037088487</v>
      </c>
      <c r="AU17" s="6">
        <v>3505.12708734814</v>
      </c>
      <c r="AV17" s="6">
        <v>2193.64897382831</v>
      </c>
      <c r="AW17" s="6">
        <v>2186.33077418251</v>
      </c>
      <c r="AX17" s="6">
        <v>2224.18640422487</v>
      </c>
      <c r="AY17" s="6">
        <v>3518.96049789039</v>
      </c>
      <c r="AZ17" s="6">
        <v>3524.64892308161</v>
      </c>
      <c r="BA17" s="6">
        <v>3480.67363104119</v>
      </c>
      <c r="BB17" s="6">
        <v>3510.20954068351</v>
      </c>
      <c r="BC17" s="6">
        <v>3430.85283551578</v>
      </c>
      <c r="BD17" s="6">
        <v>3449.07198808222</v>
      </c>
      <c r="BE17" s="6">
        <v>2565.89408947275</v>
      </c>
      <c r="BF17" s="6">
        <v>2549.56395465012</v>
      </c>
      <c r="BG17" s="6">
        <v>2245.14088686903</v>
      </c>
      <c r="BH17" s="6">
        <v>2178.54835882251</v>
      </c>
      <c r="BI17" s="6">
        <v>2197.35072737239</v>
      </c>
      <c r="BJ17" s="6">
        <v>2207.45933224484</v>
      </c>
      <c r="BK17" s="6">
        <v>3351.8000674493</v>
      </c>
      <c r="BL17" s="6">
        <v>3404.40804685074</v>
      </c>
      <c r="BM17" s="6">
        <v>3327.33682299443</v>
      </c>
      <c r="BN17" s="6">
        <v>3332.85895473007</v>
      </c>
      <c r="BO17" s="6">
        <v>3237.68108932167</v>
      </c>
      <c r="BP17" s="6">
        <v>3278.58489674626</v>
      </c>
      <c r="BQ17" s="6">
        <v>2305.94041886625</v>
      </c>
      <c r="BR17" s="6">
        <v>2240.0546271383</v>
      </c>
      <c r="BS17" s="6">
        <v>2499.2723152561</v>
      </c>
      <c r="BT17" s="6">
        <v>2189.98626877438</v>
      </c>
      <c r="BU17" s="6">
        <v>2203.50655890564</v>
      </c>
      <c r="BV17" s="6">
        <v>2194.36504602066</v>
      </c>
      <c r="BW17" s="6">
        <v>3488.7681059419</v>
      </c>
      <c r="BX17" s="6">
        <v>3521.02430706342</v>
      </c>
      <c r="BY17" s="6">
        <v>3458.44037818794</v>
      </c>
      <c r="BZ17" s="6">
        <v>3468.28691002095</v>
      </c>
      <c r="CA17" s="6">
        <v>3382.70897407276</v>
      </c>
      <c r="CB17" s="6">
        <v>3430.69199692355</v>
      </c>
      <c r="CC17" s="6">
        <v>2258.79994768393</v>
      </c>
      <c r="CD17" s="6">
        <v>2249.85537557046</v>
      </c>
      <c r="CE17" s="6">
        <v>2529.55101785141</v>
      </c>
      <c r="CF17" s="6">
        <v>2196.79364149777</v>
      </c>
      <c r="CG17" s="6">
        <v>2188.24194952735</v>
      </c>
      <c r="CH17" s="6">
        <v>2175.75181016814</v>
      </c>
      <c r="CI17" s="6">
        <v>3290.19119271089</v>
      </c>
      <c r="CJ17" s="6">
        <v>3401.40162643602</v>
      </c>
      <c r="CK17" s="6">
        <v>3218.03996396675</v>
      </c>
      <c r="CL17" s="6">
        <v>3286.6948116948</v>
      </c>
      <c r="CM17" s="6">
        <v>3248.3511816427</v>
      </c>
      <c r="CN17" s="6">
        <v>2821.09161463988</v>
      </c>
      <c r="CO17" s="6">
        <v>2229.38148781613</v>
      </c>
      <c r="CP17" s="6">
        <v>2453.32193749412</v>
      </c>
      <c r="CQ17" s="6">
        <v>2362.6002053933</v>
      </c>
      <c r="CR17" s="6">
        <v>2175.17662992603</v>
      </c>
      <c r="CS17" s="6">
        <v>2191.9528121708</v>
      </c>
      <c r="CT17" s="6">
        <v>2192.54475363063</v>
      </c>
    </row>
    <row r="18" spans="2:98" ht="15" customHeight="true">
      <c r="B18" s="6">
        <v>73</v>
      </c>
      <c r="C18" s="6">
        <v>3475.74671795067</v>
      </c>
      <c r="D18" s="6">
        <v>3426.83135544659</v>
      </c>
      <c r="E18" s="6">
        <v>3537.33310975734</v>
      </c>
      <c r="F18" s="6">
        <v>3486.71479863451</v>
      </c>
      <c r="G18" s="6">
        <v>3476.30458426299</v>
      </c>
      <c r="H18" s="6">
        <v>3612.01063606954</v>
      </c>
      <c r="I18" s="6">
        <v>3514.32594571431</v>
      </c>
      <c r="J18" s="6">
        <v>3516.08804738126</v>
      </c>
      <c r="K18" s="6">
        <v>3512.25421934877</v>
      </c>
      <c r="L18" s="6">
        <v>2238.67296048098</v>
      </c>
      <c r="M18" s="6">
        <v>2187.05165615006</v>
      </c>
      <c r="N18" s="6">
        <v>2198.29527487555</v>
      </c>
      <c r="O18" s="6">
        <v>3383.31425895684</v>
      </c>
      <c r="P18" s="6">
        <v>3577.82257526553</v>
      </c>
      <c r="Q18" s="6">
        <v>3477.26332074076</v>
      </c>
      <c r="R18" s="6">
        <v>3476.74847035259</v>
      </c>
      <c r="S18" s="6">
        <v>3448.63689871712</v>
      </c>
      <c r="T18" s="6">
        <v>3497.80153142589</v>
      </c>
      <c r="U18" s="6">
        <v>3481.04074409166</v>
      </c>
      <c r="V18" s="6">
        <v>3448.23811765184</v>
      </c>
      <c r="W18" s="6">
        <v>3478.9767652236</v>
      </c>
      <c r="X18" s="6">
        <v>2199.15342667774</v>
      </c>
      <c r="Y18" s="6">
        <v>2200.42489803733</v>
      </c>
      <c r="Z18" s="6">
        <v>2177.90322791525</v>
      </c>
      <c r="AA18" s="6">
        <v>3592.21390144979</v>
      </c>
      <c r="AB18" s="6">
        <v>3668.68780204578</v>
      </c>
      <c r="AC18" s="6">
        <v>3695.30724968063</v>
      </c>
      <c r="AD18" s="6">
        <v>3639.59959946224</v>
      </c>
      <c r="AE18" s="6">
        <v>3673.71279544367</v>
      </c>
      <c r="AF18" s="6">
        <v>3731.13497602097</v>
      </c>
      <c r="AG18" s="6">
        <v>3746.1417856297</v>
      </c>
      <c r="AH18" s="6">
        <v>3651.62840811573</v>
      </c>
      <c r="AI18" s="6">
        <v>3529.07882266493</v>
      </c>
      <c r="AJ18" s="6">
        <v>2203.56512857839</v>
      </c>
      <c r="AK18" s="6">
        <v>2215.17193040155</v>
      </c>
      <c r="AL18" s="6">
        <v>2208.71465530398</v>
      </c>
      <c r="AM18" s="6">
        <v>3403.37636529839</v>
      </c>
      <c r="AN18" s="6">
        <v>3558.07397338619</v>
      </c>
      <c r="AO18" s="6">
        <v>3496.95432357928</v>
      </c>
      <c r="AP18" s="6">
        <v>3593.21254135578</v>
      </c>
      <c r="AQ18" s="6">
        <v>3515.46100248795</v>
      </c>
      <c r="AR18" s="6">
        <v>3542.63246260648</v>
      </c>
      <c r="AS18" s="6">
        <v>3580.65849594775</v>
      </c>
      <c r="AT18" s="6">
        <v>3630.03037598769</v>
      </c>
      <c r="AU18" s="6">
        <v>3478.84236421497</v>
      </c>
      <c r="AV18" s="6">
        <v>2193.04239364111</v>
      </c>
      <c r="AW18" s="6">
        <v>2186.09051521204</v>
      </c>
      <c r="AX18" s="6">
        <v>2224.21707634541</v>
      </c>
      <c r="AY18" s="6">
        <v>3488.83488044817</v>
      </c>
      <c r="AZ18" s="6">
        <v>3492.64665304506</v>
      </c>
      <c r="BA18" s="6">
        <v>3450.16067924262</v>
      </c>
      <c r="BB18" s="6">
        <v>3479.06984790881</v>
      </c>
      <c r="BC18" s="6">
        <v>3399.80114156562</v>
      </c>
      <c r="BD18" s="6">
        <v>3417.92550272304</v>
      </c>
      <c r="BE18" s="6">
        <v>2538.36677910522</v>
      </c>
      <c r="BF18" s="6">
        <v>2494.32714498775</v>
      </c>
      <c r="BG18" s="6">
        <v>2243.20930116348</v>
      </c>
      <c r="BH18" s="6">
        <v>2178.69698137302</v>
      </c>
      <c r="BI18" s="6">
        <v>2197.46849389106</v>
      </c>
      <c r="BJ18" s="6">
        <v>2207.08701521541</v>
      </c>
      <c r="BK18" s="6">
        <v>3324.84388495501</v>
      </c>
      <c r="BL18" s="6">
        <v>3378.44979680364</v>
      </c>
      <c r="BM18" s="6">
        <v>3300.5001486586</v>
      </c>
      <c r="BN18" s="6">
        <v>3306.20869017701</v>
      </c>
      <c r="BO18" s="6">
        <v>3212.60641542972</v>
      </c>
      <c r="BP18" s="6">
        <v>3251.47629864545</v>
      </c>
      <c r="BQ18" s="6">
        <v>2291.949236595</v>
      </c>
      <c r="BR18" s="6">
        <v>2238.29873593434</v>
      </c>
      <c r="BS18" s="6">
        <v>2448.35934905507</v>
      </c>
      <c r="BT18" s="6">
        <v>2189.68494810531</v>
      </c>
      <c r="BU18" s="6">
        <v>2203.56539418182</v>
      </c>
      <c r="BV18" s="6">
        <v>2194.47200048623</v>
      </c>
      <c r="BW18" s="6">
        <v>3459.19579737705</v>
      </c>
      <c r="BX18" s="6">
        <v>3492.07094200398</v>
      </c>
      <c r="BY18" s="6">
        <v>3429.3576342087</v>
      </c>
      <c r="BZ18" s="6">
        <v>3435.36749066954</v>
      </c>
      <c r="CA18" s="6">
        <v>3354.43598270936</v>
      </c>
      <c r="CB18" s="6">
        <v>3404.28226872296</v>
      </c>
      <c r="CC18" s="6">
        <v>2257.31908583578</v>
      </c>
      <c r="CD18" s="6">
        <v>2247.45800900364</v>
      </c>
      <c r="CE18" s="6">
        <v>2504.76688759204</v>
      </c>
      <c r="CF18" s="6">
        <v>2195.40628469287</v>
      </c>
      <c r="CG18" s="6">
        <v>2187.55075027368</v>
      </c>
      <c r="CH18" s="6">
        <v>2175.17268692681</v>
      </c>
      <c r="CI18" s="6">
        <v>3265.93828031214</v>
      </c>
      <c r="CJ18" s="6">
        <v>3374.43963359806</v>
      </c>
      <c r="CK18" s="6">
        <v>3193.3830090272</v>
      </c>
      <c r="CL18" s="6">
        <v>3260.3013721741</v>
      </c>
      <c r="CM18" s="6">
        <v>3222.72501963978</v>
      </c>
      <c r="CN18" s="6">
        <v>2794.51243145582</v>
      </c>
      <c r="CO18" s="6">
        <v>2228.34074569776</v>
      </c>
      <c r="CP18" s="6">
        <v>2443.86227526984</v>
      </c>
      <c r="CQ18" s="6">
        <v>2357.41372486083</v>
      </c>
      <c r="CR18" s="6">
        <v>2174.99410503165</v>
      </c>
      <c r="CS18" s="6">
        <v>2191.66932773565</v>
      </c>
      <c r="CT18" s="6">
        <v>2192.03311871401</v>
      </c>
    </row>
    <row r="19" spans="2:98" ht="15" customHeight="true">
      <c r="B19" s="6">
        <v>73.5</v>
      </c>
      <c r="C19" s="6">
        <v>3451.35933458598</v>
      </c>
      <c r="D19" s="6">
        <v>3403.43396168108</v>
      </c>
      <c r="E19" s="6">
        <v>3509.42986714726</v>
      </c>
      <c r="F19" s="6">
        <v>3457.11846315948</v>
      </c>
      <c r="G19" s="6">
        <v>3451.57325227501</v>
      </c>
      <c r="H19" s="6">
        <v>3583.91163607437</v>
      </c>
      <c r="I19" s="6">
        <v>3487.05922810051</v>
      </c>
      <c r="J19" s="6">
        <v>3489.69715574093</v>
      </c>
      <c r="K19" s="6">
        <v>3483.95104565025</v>
      </c>
      <c r="L19" s="6">
        <v>2237.80654732159</v>
      </c>
      <c r="M19" s="6">
        <v>2187.04006729238</v>
      </c>
      <c r="N19" s="6">
        <v>2197.87225573073</v>
      </c>
      <c r="O19" s="6">
        <v>3360.56840160073</v>
      </c>
      <c r="P19" s="6">
        <v>3551.05198146312</v>
      </c>
      <c r="Q19" s="6">
        <v>3451.2757853234</v>
      </c>
      <c r="R19" s="6">
        <v>3450.23779778331</v>
      </c>
      <c r="S19" s="6">
        <v>3423.58919217174</v>
      </c>
      <c r="T19" s="6">
        <v>3473.47761630654</v>
      </c>
      <c r="U19" s="6">
        <v>3454.96874801081</v>
      </c>
      <c r="V19" s="6">
        <v>3423.68837741484</v>
      </c>
      <c r="W19" s="6">
        <v>3452.02133233876</v>
      </c>
      <c r="X19" s="6">
        <v>2198.54041888212</v>
      </c>
      <c r="Y19" s="6">
        <v>2199.74269720785</v>
      </c>
      <c r="Z19" s="6">
        <v>2177.24195575179</v>
      </c>
      <c r="AA19" s="6">
        <v>3563.72939356634</v>
      </c>
      <c r="AB19" s="6">
        <v>3641.68557559709</v>
      </c>
      <c r="AC19" s="6">
        <v>3664.66121410146</v>
      </c>
      <c r="AD19" s="6">
        <v>3607.41062663</v>
      </c>
      <c r="AE19" s="6">
        <v>3642.76990886983</v>
      </c>
      <c r="AF19" s="6">
        <v>3703.63070827438</v>
      </c>
      <c r="AG19" s="6">
        <v>3713.52229287023</v>
      </c>
      <c r="AH19" s="6">
        <v>3621.42695207782</v>
      </c>
      <c r="AI19" s="6">
        <v>3500.84766052856</v>
      </c>
      <c r="AJ19" s="6">
        <v>2203.18854849682</v>
      </c>
      <c r="AK19" s="6">
        <v>2214.59022020006</v>
      </c>
      <c r="AL19" s="6">
        <v>2207.93038706648</v>
      </c>
      <c r="AM19" s="6">
        <v>3378.58697781611</v>
      </c>
      <c r="AN19" s="6">
        <v>3533.93768887362</v>
      </c>
      <c r="AO19" s="6">
        <v>3471.85136117419</v>
      </c>
      <c r="AP19" s="6">
        <v>3565.3664509293</v>
      </c>
      <c r="AQ19" s="6">
        <v>3488.12961641176</v>
      </c>
      <c r="AR19" s="6">
        <v>3517.68583227188</v>
      </c>
      <c r="AS19" s="6">
        <v>3553.62830953451</v>
      </c>
      <c r="AT19" s="6">
        <v>3603.00592336322</v>
      </c>
      <c r="AU19" s="6">
        <v>3452.14285390432</v>
      </c>
      <c r="AV19" s="6">
        <v>2192.55718066424</v>
      </c>
      <c r="AW19" s="6">
        <v>2185.46508659525</v>
      </c>
      <c r="AX19" s="6">
        <v>2223.95116513991</v>
      </c>
      <c r="AY19" s="6">
        <v>3458.18882811147</v>
      </c>
      <c r="AZ19" s="6">
        <v>3460.04916920127</v>
      </c>
      <c r="BA19" s="6">
        <v>3419.10754385968</v>
      </c>
      <c r="BB19" s="6">
        <v>3447.37998993568</v>
      </c>
      <c r="BC19" s="6">
        <v>3368.24434397756</v>
      </c>
      <c r="BD19" s="6">
        <v>3386.79147761383</v>
      </c>
      <c r="BE19" s="6">
        <v>2511.3428557745</v>
      </c>
      <c r="BF19" s="6">
        <v>2439.51156013663</v>
      </c>
      <c r="BG19" s="6">
        <v>2240.97437940566</v>
      </c>
      <c r="BH19" s="6">
        <v>2178.47877001268</v>
      </c>
      <c r="BI19" s="6">
        <v>2197.34790711134</v>
      </c>
      <c r="BJ19" s="6">
        <v>2206.66765583002</v>
      </c>
      <c r="BK19" s="6">
        <v>3297.99458131237</v>
      </c>
      <c r="BL19" s="6">
        <v>3352.32787193365</v>
      </c>
      <c r="BM19" s="6">
        <v>3273.47480247081</v>
      </c>
      <c r="BN19" s="6">
        <v>3279.56213403506</v>
      </c>
      <c r="BO19" s="6">
        <v>3187.57779139634</v>
      </c>
      <c r="BP19" s="6">
        <v>3224.45585192823</v>
      </c>
      <c r="BQ19" s="6">
        <v>2278.3627387851</v>
      </c>
      <c r="BR19" s="6">
        <v>2236.52847467345</v>
      </c>
      <c r="BS19" s="6">
        <v>2397.31954858107</v>
      </c>
      <c r="BT19" s="6">
        <v>2189.42840184268</v>
      </c>
      <c r="BU19" s="6">
        <v>2203.64641060329</v>
      </c>
      <c r="BV19" s="6">
        <v>2194.58754918135</v>
      </c>
      <c r="BW19" s="6">
        <v>3429.50467444076</v>
      </c>
      <c r="BX19" s="6">
        <v>3463.03171793643</v>
      </c>
      <c r="BY19" s="6">
        <v>3399.98927488996</v>
      </c>
      <c r="BZ19" s="6">
        <v>3402.93720322648</v>
      </c>
      <c r="CA19" s="6">
        <v>3326.10070237205</v>
      </c>
      <c r="CB19" s="6">
        <v>3377.26639032177</v>
      </c>
      <c r="CC19" s="6">
        <v>2255.49875561063</v>
      </c>
      <c r="CD19" s="6">
        <v>2244.84601984105</v>
      </c>
      <c r="CE19" s="6">
        <v>2480.05704475397</v>
      </c>
      <c r="CF19" s="6">
        <v>2194.25924350646</v>
      </c>
      <c r="CG19" s="6">
        <v>2186.97876015262</v>
      </c>
      <c r="CH19" s="6">
        <v>2174.4689551546</v>
      </c>
      <c r="CI19" s="6">
        <v>3241.79997079364</v>
      </c>
      <c r="CJ19" s="6">
        <v>3347.50533517971</v>
      </c>
      <c r="CK19" s="6">
        <v>3168.88529953559</v>
      </c>
      <c r="CL19" s="6">
        <v>3233.4650279834</v>
      </c>
      <c r="CM19" s="6">
        <v>3197.28328767088</v>
      </c>
      <c r="CN19" s="6">
        <v>2767.04678899512</v>
      </c>
      <c r="CO19" s="6">
        <v>2227.5859450731</v>
      </c>
      <c r="CP19" s="6">
        <v>2433.62612176684</v>
      </c>
      <c r="CQ19" s="6">
        <v>2352.35622374065</v>
      </c>
      <c r="CR19" s="6">
        <v>2174.3545579729</v>
      </c>
      <c r="CS19" s="6">
        <v>2191.51550216769</v>
      </c>
      <c r="CT19" s="6">
        <v>2191.73499196481</v>
      </c>
    </row>
    <row r="20" spans="2:98" ht="15" customHeight="true">
      <c r="B20" s="6">
        <v>74</v>
      </c>
      <c r="C20" s="6">
        <v>3426.51023454802</v>
      </c>
      <c r="D20" s="6">
        <v>3379.1994229252</v>
      </c>
      <c r="E20" s="6">
        <v>3481.00224177746</v>
      </c>
      <c r="F20" s="6">
        <v>3427.95041698979</v>
      </c>
      <c r="G20" s="6">
        <v>3426.5962603174</v>
      </c>
      <c r="H20" s="6">
        <v>3555.66188484872</v>
      </c>
      <c r="I20" s="6">
        <v>3459.22820298822</v>
      </c>
      <c r="J20" s="6">
        <v>3462.79594357868</v>
      </c>
      <c r="K20" s="6">
        <v>3455.70902334557</v>
      </c>
      <c r="L20" s="6">
        <v>2236.77498728434</v>
      </c>
      <c r="M20" s="6">
        <v>2186.67560596721</v>
      </c>
      <c r="N20" s="6">
        <v>2197.26678209306</v>
      </c>
      <c r="O20" s="6">
        <v>3337.60816822791</v>
      </c>
      <c r="P20" s="6">
        <v>3524.37282467787</v>
      </c>
      <c r="Q20" s="6">
        <v>3425.45156680523</v>
      </c>
      <c r="R20" s="6">
        <v>3423.79822698273</v>
      </c>
      <c r="S20" s="6">
        <v>3398.16055144585</v>
      </c>
      <c r="T20" s="6">
        <v>3448.82460371878</v>
      </c>
      <c r="U20" s="6">
        <v>3428.73129433203</v>
      </c>
      <c r="V20" s="6">
        <v>3398.85418676863</v>
      </c>
      <c r="W20" s="6">
        <v>3425.54643889498</v>
      </c>
      <c r="X20" s="6">
        <v>2198.16330721335</v>
      </c>
      <c r="Y20" s="6">
        <v>2199.18003406674</v>
      </c>
      <c r="Z20" s="6">
        <v>2176.82394710241</v>
      </c>
      <c r="AA20" s="6">
        <v>3534.89031570113</v>
      </c>
      <c r="AB20" s="6">
        <v>3614.25319665564</v>
      </c>
      <c r="AC20" s="6">
        <v>3634.09058240612</v>
      </c>
      <c r="AD20" s="6">
        <v>3575.39101129079</v>
      </c>
      <c r="AE20" s="6">
        <v>3612.05401252419</v>
      </c>
      <c r="AF20" s="6">
        <v>3676.5254222869</v>
      </c>
      <c r="AG20" s="6">
        <v>3680.97357266153</v>
      </c>
      <c r="AH20" s="6">
        <v>3590.84218441145</v>
      </c>
      <c r="AI20" s="6">
        <v>3472.69457538407</v>
      </c>
      <c r="AJ20" s="6">
        <v>2202.39462225534</v>
      </c>
      <c r="AK20" s="6">
        <v>2214.19669089742</v>
      </c>
      <c r="AL20" s="6">
        <v>2207.29655104832</v>
      </c>
      <c r="AM20" s="6">
        <v>3353.64584256336</v>
      </c>
      <c r="AN20" s="6">
        <v>3509.38984603669</v>
      </c>
      <c r="AO20" s="6">
        <v>3446.97864325741</v>
      </c>
      <c r="AP20" s="6">
        <v>3537.63552081476</v>
      </c>
      <c r="AQ20" s="6">
        <v>3460.49976846241</v>
      </c>
      <c r="AR20" s="6">
        <v>3492.74976492211</v>
      </c>
      <c r="AS20" s="6">
        <v>3526.26599845219</v>
      </c>
      <c r="AT20" s="6">
        <v>3575.04587212904</v>
      </c>
      <c r="AU20" s="6">
        <v>3425.32521389111</v>
      </c>
      <c r="AV20" s="6">
        <v>2192.06401931282</v>
      </c>
      <c r="AW20" s="6">
        <v>2184.96173170919</v>
      </c>
      <c r="AX20" s="6">
        <v>2223.56508772448</v>
      </c>
      <c r="AY20" s="6">
        <v>3427.70233735239</v>
      </c>
      <c r="AZ20" s="6">
        <v>3427.10134684759</v>
      </c>
      <c r="BA20" s="6">
        <v>3387.91888523295</v>
      </c>
      <c r="BB20" s="6">
        <v>3415.63166318687</v>
      </c>
      <c r="BC20" s="6">
        <v>3336.21608234422</v>
      </c>
      <c r="BD20" s="6">
        <v>3355.86158577592</v>
      </c>
      <c r="BE20" s="6">
        <v>2485.2247862146</v>
      </c>
      <c r="BF20" s="6">
        <v>2389.94088659915</v>
      </c>
      <c r="BG20" s="6">
        <v>2239.08491207718</v>
      </c>
      <c r="BH20" s="6">
        <v>2178.25265581351</v>
      </c>
      <c r="BI20" s="6">
        <v>2197.39655002793</v>
      </c>
      <c r="BJ20" s="6">
        <v>2206.39235191169</v>
      </c>
      <c r="BK20" s="6">
        <v>3271.52633565712</v>
      </c>
      <c r="BL20" s="6">
        <v>3325.5264660103</v>
      </c>
      <c r="BM20" s="6">
        <v>3246.09888778135</v>
      </c>
      <c r="BN20" s="6">
        <v>3252.7605328027</v>
      </c>
      <c r="BO20" s="6">
        <v>3162.21413952819</v>
      </c>
      <c r="BP20" s="6">
        <v>3197.8118675701</v>
      </c>
      <c r="BQ20" s="6">
        <v>2267.17751377619</v>
      </c>
      <c r="BR20" s="6">
        <v>2234.66236663457</v>
      </c>
      <c r="BS20" s="6">
        <v>2351.34990809403</v>
      </c>
      <c r="BT20" s="6">
        <v>2189.1194300902</v>
      </c>
      <c r="BU20" s="6">
        <v>2203.64867620873</v>
      </c>
      <c r="BV20" s="6">
        <v>2194.53215414467</v>
      </c>
      <c r="BW20" s="6">
        <v>3399.91861999158</v>
      </c>
      <c r="BX20" s="6">
        <v>3433.67321669772</v>
      </c>
      <c r="BY20" s="6">
        <v>3370.50717094055</v>
      </c>
      <c r="BZ20" s="6">
        <v>3370.77876141171</v>
      </c>
      <c r="CA20" s="6">
        <v>3297.49982904425</v>
      </c>
      <c r="CB20" s="6">
        <v>3350.18755529086</v>
      </c>
      <c r="CC20" s="6">
        <v>2253.92646180446</v>
      </c>
      <c r="CD20" s="6">
        <v>2242.40662484704</v>
      </c>
      <c r="CE20" s="6">
        <v>2456.44413578742</v>
      </c>
      <c r="CF20" s="6">
        <v>2192.95698124303</v>
      </c>
      <c r="CG20" s="6">
        <v>2186.06705305426</v>
      </c>
      <c r="CH20" s="6">
        <v>2174.04883699413</v>
      </c>
      <c r="CI20" s="6">
        <v>3218.02895136474</v>
      </c>
      <c r="CJ20" s="6">
        <v>3320.6528429831</v>
      </c>
      <c r="CK20" s="6">
        <v>3144.44934331001</v>
      </c>
      <c r="CL20" s="6">
        <v>3207.08536675244</v>
      </c>
      <c r="CM20" s="6">
        <v>3171.74151286098</v>
      </c>
      <c r="CN20" s="6">
        <v>2739.6556866627</v>
      </c>
      <c r="CO20" s="6">
        <v>2226.93386341169</v>
      </c>
      <c r="CP20" s="6">
        <v>2421.57480277956</v>
      </c>
      <c r="CQ20" s="6">
        <v>2347.40280401776</v>
      </c>
      <c r="CR20" s="6">
        <v>2173.87438678689</v>
      </c>
      <c r="CS20" s="6">
        <v>2191.2054267328</v>
      </c>
      <c r="CT20" s="6">
        <v>2191.82368125171</v>
      </c>
    </row>
    <row r="21" spans="2:98" ht="15" customHeight="true">
      <c r="B21" s="6">
        <v>74.5</v>
      </c>
      <c r="C21" s="6">
        <v>3401.2283499128</v>
      </c>
      <c r="D21" s="6">
        <v>3354.89696467695</v>
      </c>
      <c r="E21" s="6">
        <v>3452.76547893847</v>
      </c>
      <c r="F21" s="6">
        <v>3399.0886084738</v>
      </c>
      <c r="G21" s="6">
        <v>3401.42880760443</v>
      </c>
      <c r="H21" s="6">
        <v>3527.91168751958</v>
      </c>
      <c r="I21" s="6">
        <v>3431.8285483183</v>
      </c>
      <c r="J21" s="6">
        <v>3436.13839003206</v>
      </c>
      <c r="K21" s="6">
        <v>3428.39231686277</v>
      </c>
      <c r="L21" s="6">
        <v>2235.79463386195</v>
      </c>
      <c r="M21" s="6">
        <v>2186.29251754406</v>
      </c>
      <c r="N21" s="6">
        <v>2196.29187808503</v>
      </c>
      <c r="O21" s="6">
        <v>3314.2801113858</v>
      </c>
      <c r="P21" s="6">
        <v>3497.55413138493</v>
      </c>
      <c r="Q21" s="6">
        <v>3399.44642637365</v>
      </c>
      <c r="R21" s="6">
        <v>3397.53471850156</v>
      </c>
      <c r="S21" s="6">
        <v>3372.25783247814</v>
      </c>
      <c r="T21" s="6">
        <v>3424.08068155778</v>
      </c>
      <c r="U21" s="6">
        <v>3402.44172640663</v>
      </c>
      <c r="V21" s="6">
        <v>3374.16546534464</v>
      </c>
      <c r="W21" s="6">
        <v>3399.33250487639</v>
      </c>
      <c r="X21" s="6">
        <v>2198.18226565304</v>
      </c>
      <c r="Y21" s="6">
        <v>2198.44781905052</v>
      </c>
      <c r="Z21" s="6">
        <v>2176.34437155151</v>
      </c>
      <c r="AA21" s="6">
        <v>3506.45695313641</v>
      </c>
      <c r="AB21" s="6">
        <v>3586.57381121676</v>
      </c>
      <c r="AC21" s="6">
        <v>3603.27907184749</v>
      </c>
      <c r="AD21" s="6">
        <v>3543.78687450048</v>
      </c>
      <c r="AE21" s="6">
        <v>3581.54489201628</v>
      </c>
      <c r="AF21" s="6">
        <v>3649.4127121008</v>
      </c>
      <c r="AG21" s="6">
        <v>3648.45615011834</v>
      </c>
      <c r="AH21" s="6">
        <v>3560.37340873266</v>
      </c>
      <c r="AI21" s="6">
        <v>3444.78217346891</v>
      </c>
      <c r="AJ21" s="6">
        <v>2201.68218164148</v>
      </c>
      <c r="AK21" s="6">
        <v>2214.05129540034</v>
      </c>
      <c r="AL21" s="6">
        <v>2206.87585430347</v>
      </c>
      <c r="AM21" s="6">
        <v>3328.37280159976</v>
      </c>
      <c r="AN21" s="6">
        <v>3484.87783051586</v>
      </c>
      <c r="AO21" s="6">
        <v>3421.94899789824</v>
      </c>
      <c r="AP21" s="6">
        <v>3509.61574120732</v>
      </c>
      <c r="AQ21" s="6">
        <v>3432.93073651447</v>
      </c>
      <c r="AR21" s="6">
        <v>3467.34526696664</v>
      </c>
      <c r="AS21" s="6">
        <v>3498.86591671678</v>
      </c>
      <c r="AT21" s="6">
        <v>3547.05955336679</v>
      </c>
      <c r="AU21" s="6">
        <v>3398.98663432507</v>
      </c>
      <c r="AV21" s="6">
        <v>2191.7236861307</v>
      </c>
      <c r="AW21" s="6">
        <v>2184.59442306292</v>
      </c>
      <c r="AX21" s="6">
        <v>2223.14044571865</v>
      </c>
      <c r="AY21" s="6">
        <v>3397.13071370232</v>
      </c>
      <c r="AZ21" s="6">
        <v>3394.31816119335</v>
      </c>
      <c r="BA21" s="6">
        <v>3356.69803925721</v>
      </c>
      <c r="BB21" s="6">
        <v>3384.02787331503</v>
      </c>
      <c r="BC21" s="6">
        <v>3304.04623996256</v>
      </c>
      <c r="BD21" s="6">
        <v>3325.15542352228</v>
      </c>
      <c r="BE21" s="6">
        <v>2458.34497206933</v>
      </c>
      <c r="BF21" s="6">
        <v>2349.18787778375</v>
      </c>
      <c r="BG21" s="6">
        <v>2237.4542390806</v>
      </c>
      <c r="BH21" s="6">
        <v>2177.89835006665</v>
      </c>
      <c r="BI21" s="6">
        <v>2197.1660002656</v>
      </c>
      <c r="BJ21" s="6">
        <v>2205.99001884168</v>
      </c>
      <c r="BK21" s="6">
        <v>3245.01254879533</v>
      </c>
      <c r="BL21" s="6">
        <v>3298.61282182164</v>
      </c>
      <c r="BM21" s="6">
        <v>3218.80384589955</v>
      </c>
      <c r="BN21" s="6">
        <v>3225.922242547</v>
      </c>
      <c r="BO21" s="6">
        <v>3136.59777135861</v>
      </c>
      <c r="BP21" s="6">
        <v>3171.26439259465</v>
      </c>
      <c r="BQ21" s="6">
        <v>2258.72881334129</v>
      </c>
      <c r="BR21" s="6">
        <v>2232.85541111752</v>
      </c>
      <c r="BS21" s="6">
        <v>2313.10940494856</v>
      </c>
      <c r="BT21" s="6">
        <v>2188.63198155471</v>
      </c>
      <c r="BU21" s="6">
        <v>2203.65109802853</v>
      </c>
      <c r="BV21" s="6">
        <v>2194.72600314071</v>
      </c>
      <c r="BW21" s="6">
        <v>3370.0723300913</v>
      </c>
      <c r="BX21" s="6">
        <v>3403.88287624783</v>
      </c>
      <c r="BY21" s="6">
        <v>3340.94359334997</v>
      </c>
      <c r="BZ21" s="6">
        <v>3339.36463392633</v>
      </c>
      <c r="CA21" s="6">
        <v>3268.81750110287</v>
      </c>
      <c r="CB21" s="6">
        <v>3322.93413002439</v>
      </c>
      <c r="CC21" s="6">
        <v>2252.24231567338</v>
      </c>
      <c r="CD21" s="6">
        <v>2240.00279937293</v>
      </c>
      <c r="CE21" s="6">
        <v>2433.53144428881</v>
      </c>
      <c r="CF21" s="6">
        <v>2191.91769646986</v>
      </c>
      <c r="CG21" s="6">
        <v>2184.90295459167</v>
      </c>
      <c r="CH21" s="6">
        <v>2173.84136619098</v>
      </c>
      <c r="CI21" s="6">
        <v>3194.06328672236</v>
      </c>
      <c r="CJ21" s="6">
        <v>3293.4869224153</v>
      </c>
      <c r="CK21" s="6">
        <v>3120.21561878286</v>
      </c>
      <c r="CL21" s="6">
        <v>3180.9437742156</v>
      </c>
      <c r="CM21" s="6">
        <v>3145.96910488609</v>
      </c>
      <c r="CN21" s="6">
        <v>2712.96620958234</v>
      </c>
      <c r="CO21" s="6">
        <v>2226.13219163977</v>
      </c>
      <c r="CP21" s="6">
        <v>2407.13940911794</v>
      </c>
      <c r="CQ21" s="6">
        <v>2342.34728548068</v>
      </c>
      <c r="CR21" s="6">
        <v>2173.06683916533</v>
      </c>
      <c r="CS21" s="6">
        <v>2190.39390005308</v>
      </c>
      <c r="CT21" s="6">
        <v>2191.63845897287</v>
      </c>
    </row>
    <row r="22" spans="2:98" ht="15" customHeight="true">
      <c r="B22" s="6">
        <v>75</v>
      </c>
      <c r="C22" s="6">
        <v>3375.88928337232</v>
      </c>
      <c r="D22" s="6">
        <v>3330.5634134003</v>
      </c>
      <c r="E22" s="6">
        <v>3424.83807713843</v>
      </c>
      <c r="F22" s="6">
        <v>3370.74061013247</v>
      </c>
      <c r="G22" s="6">
        <v>3376.23706681439</v>
      </c>
      <c r="H22" s="6">
        <v>3500.14052752686</v>
      </c>
      <c r="I22" s="6">
        <v>3404.40639290469</v>
      </c>
      <c r="J22" s="6">
        <v>3409.54787588943</v>
      </c>
      <c r="K22" s="6">
        <v>3401.11859938846</v>
      </c>
      <c r="L22" s="6">
        <v>2235.16654422499</v>
      </c>
      <c r="M22" s="6">
        <v>2185.8318196571</v>
      </c>
      <c r="N22" s="6">
        <v>2195.63359489346</v>
      </c>
      <c r="O22" s="6">
        <v>3290.8846939091</v>
      </c>
      <c r="P22" s="6">
        <v>3470.66620549236</v>
      </c>
      <c r="Q22" s="6">
        <v>3373.67756519273</v>
      </c>
      <c r="R22" s="6">
        <v>3371.16782513386</v>
      </c>
      <c r="S22" s="6">
        <v>3346.34297763144</v>
      </c>
      <c r="T22" s="6">
        <v>3398.83284461211</v>
      </c>
      <c r="U22" s="6">
        <v>3376.48650752023</v>
      </c>
      <c r="V22" s="6">
        <v>3349.56934131665</v>
      </c>
      <c r="W22" s="6">
        <v>3373.16163862208</v>
      </c>
      <c r="X22" s="6">
        <v>2198.4298100504</v>
      </c>
      <c r="Y22" s="6">
        <v>2197.75747669519</v>
      </c>
      <c r="Z22" s="6">
        <v>2175.95194934539</v>
      </c>
      <c r="AA22" s="6">
        <v>3478.14164775584</v>
      </c>
      <c r="AB22" s="6">
        <v>3558.2459167651</v>
      </c>
      <c r="AC22" s="6">
        <v>3572.64138448146</v>
      </c>
      <c r="AD22" s="6">
        <v>3512.39852404984</v>
      </c>
      <c r="AE22" s="6">
        <v>3550.93802234135</v>
      </c>
      <c r="AF22" s="6">
        <v>3622.56670812702</v>
      </c>
      <c r="AG22" s="6">
        <v>3615.51192113304</v>
      </c>
      <c r="AH22" s="6">
        <v>3529.86710629865</v>
      </c>
      <c r="AI22" s="6">
        <v>3416.86734884794</v>
      </c>
      <c r="AJ22" s="6">
        <v>2200.73325970192</v>
      </c>
      <c r="AK22" s="6">
        <v>2214.02381186</v>
      </c>
      <c r="AL22" s="6">
        <v>2206.45674318349</v>
      </c>
      <c r="AM22" s="6">
        <v>3302.44866141629</v>
      </c>
      <c r="AN22" s="6">
        <v>3460.64809418799</v>
      </c>
      <c r="AO22" s="6">
        <v>3396.9931777528</v>
      </c>
      <c r="AP22" s="6">
        <v>3481.49228154106</v>
      </c>
      <c r="AQ22" s="6">
        <v>3405.43681001327</v>
      </c>
      <c r="AR22" s="6">
        <v>3442.60888610088</v>
      </c>
      <c r="AS22" s="6">
        <v>3471.38033929761</v>
      </c>
      <c r="AT22" s="6">
        <v>3518.78855406058</v>
      </c>
      <c r="AU22" s="6">
        <v>3372.22612517374</v>
      </c>
      <c r="AV22" s="6">
        <v>2191.57989035143</v>
      </c>
      <c r="AW22" s="6">
        <v>2184.17152450722</v>
      </c>
      <c r="AX22" s="6">
        <v>2222.88246661506</v>
      </c>
      <c r="AY22" s="6">
        <v>3366.4158419947</v>
      </c>
      <c r="AZ22" s="6">
        <v>3361.20997148742</v>
      </c>
      <c r="BA22" s="6">
        <v>3325.50447513649</v>
      </c>
      <c r="BB22" s="6">
        <v>3352.35690553645</v>
      </c>
      <c r="BC22" s="6">
        <v>3271.7401900104</v>
      </c>
      <c r="BD22" s="6">
        <v>3294.80085525816</v>
      </c>
      <c r="BE22" s="6">
        <v>2428.98080575172</v>
      </c>
      <c r="BF22" s="6">
        <v>2318.94777792996</v>
      </c>
      <c r="BG22" s="6">
        <v>2235.86819191983</v>
      </c>
      <c r="BH22" s="6">
        <v>2177.20326640605</v>
      </c>
      <c r="BI22" s="6">
        <v>2196.59578364242</v>
      </c>
      <c r="BJ22" s="6">
        <v>2205.80414748355</v>
      </c>
      <c r="BK22" s="6">
        <v>3218.90147185314</v>
      </c>
      <c r="BL22" s="6">
        <v>3271.88585721265</v>
      </c>
      <c r="BM22" s="6">
        <v>3190.89154082499</v>
      </c>
      <c r="BN22" s="6">
        <v>3199.21562209416</v>
      </c>
      <c r="BO22" s="6">
        <v>3111.42964218844</v>
      </c>
      <c r="BP22" s="6">
        <v>3145.23706749909</v>
      </c>
      <c r="BQ22" s="6">
        <v>2252.85725041877</v>
      </c>
      <c r="BR22" s="6">
        <v>2231.2623601065</v>
      </c>
      <c r="BS22" s="6">
        <v>2284.33957661278</v>
      </c>
      <c r="BT22" s="6">
        <v>2188.07798108839</v>
      </c>
      <c r="BU22" s="6">
        <v>2203.69700166878</v>
      </c>
      <c r="BV22" s="6">
        <v>2194.84794294676</v>
      </c>
      <c r="BW22" s="6">
        <v>3340.18651569716</v>
      </c>
      <c r="BX22" s="6">
        <v>3373.42237543833</v>
      </c>
      <c r="BY22" s="6">
        <v>3311.66292385166</v>
      </c>
      <c r="BZ22" s="6">
        <v>3308.70848154092</v>
      </c>
      <c r="CA22" s="6">
        <v>3239.26369360909</v>
      </c>
      <c r="CB22" s="6">
        <v>3295.738433181</v>
      </c>
      <c r="CC22" s="6">
        <v>2250.58280583609</v>
      </c>
      <c r="CD22" s="6">
        <v>2237.72489469419</v>
      </c>
      <c r="CE22" s="6">
        <v>2409.50830255977</v>
      </c>
      <c r="CF22" s="6">
        <v>2191.59819302831</v>
      </c>
      <c r="CG22" s="6">
        <v>2184.31914636064</v>
      </c>
      <c r="CH22" s="6">
        <v>2173.62603372924</v>
      </c>
      <c r="CI22" s="6">
        <v>3170.2280977119</v>
      </c>
      <c r="CJ22" s="6">
        <v>3265.85302293272</v>
      </c>
      <c r="CK22" s="6">
        <v>3095.63698372379</v>
      </c>
      <c r="CL22" s="6">
        <v>3155.3180888992</v>
      </c>
      <c r="CM22" s="6">
        <v>3119.88446807933</v>
      </c>
      <c r="CN22" s="6">
        <v>2688.03571481632</v>
      </c>
      <c r="CO22" s="6">
        <v>2225.20206388315</v>
      </c>
      <c r="CP22" s="6">
        <v>2388.0203662101</v>
      </c>
      <c r="CQ22" s="6">
        <v>2337.60185579236</v>
      </c>
      <c r="CR22" s="6">
        <v>2172.65136494895</v>
      </c>
      <c r="CS22" s="6">
        <v>2189.76273329238</v>
      </c>
      <c r="CT22" s="6">
        <v>2191.4962958973</v>
      </c>
    </row>
    <row r="23" spans="2:98" ht="15" customHeight="true">
      <c r="B23" s="6">
        <v>75.5</v>
      </c>
      <c r="C23" s="6">
        <v>3351.17338235138</v>
      </c>
      <c r="D23" s="6">
        <v>3306.52219108293</v>
      </c>
      <c r="E23" s="6">
        <v>3397.0712481193</v>
      </c>
      <c r="F23" s="6">
        <v>3342.75355039841</v>
      </c>
      <c r="G23" s="6">
        <v>3351.01793267268</v>
      </c>
      <c r="H23" s="6">
        <v>3472.32334188415</v>
      </c>
      <c r="I23" s="6">
        <v>3377.15995884873</v>
      </c>
      <c r="J23" s="6">
        <v>3382.62827157946</v>
      </c>
      <c r="K23" s="6">
        <v>3373.8549784597</v>
      </c>
      <c r="L23" s="6">
        <v>2235.13149668067</v>
      </c>
      <c r="M23" s="6">
        <v>2185.48307730509</v>
      </c>
      <c r="N23" s="6">
        <v>2195.08100454129</v>
      </c>
      <c r="O23" s="6">
        <v>3267.42453830153</v>
      </c>
      <c r="P23" s="6">
        <v>3443.64519438832</v>
      </c>
      <c r="Q23" s="6">
        <v>3348.18593545197</v>
      </c>
      <c r="R23" s="6">
        <v>3345.07663667879</v>
      </c>
      <c r="S23" s="6">
        <v>3320.82071034934</v>
      </c>
      <c r="T23" s="6">
        <v>3373.35533594401</v>
      </c>
      <c r="U23" s="6">
        <v>3350.75981509662</v>
      </c>
      <c r="V23" s="6">
        <v>3324.83158475916</v>
      </c>
      <c r="W23" s="6">
        <v>3346.78388354059</v>
      </c>
      <c r="X23" s="6">
        <v>2198.4574386084</v>
      </c>
      <c r="Y23" s="6">
        <v>2197.14714077349</v>
      </c>
      <c r="Z23" s="6">
        <v>2175.55507299949</v>
      </c>
      <c r="AA23" s="6">
        <v>3449.6567404682</v>
      </c>
      <c r="AB23" s="6">
        <v>3529.7467294525</v>
      </c>
      <c r="AC23" s="6">
        <v>3541.80694239606</v>
      </c>
      <c r="AD23" s="6">
        <v>3481.95881357052</v>
      </c>
      <c r="AE23" s="6">
        <v>3520.65491237004</v>
      </c>
      <c r="AF23" s="6">
        <v>3595.40989233954</v>
      </c>
      <c r="AG23" s="6">
        <v>3582.45240116241</v>
      </c>
      <c r="AH23" s="6">
        <v>3499.16609844691</v>
      </c>
      <c r="AI23" s="6">
        <v>3388.30122866874</v>
      </c>
      <c r="AJ23" s="6">
        <v>2199.91727601269</v>
      </c>
      <c r="AK23" s="6">
        <v>2214.08779887316</v>
      </c>
      <c r="AL23" s="6">
        <v>2206.21455285936</v>
      </c>
      <c r="AM23" s="6">
        <v>3276.88253491565</v>
      </c>
      <c r="AN23" s="6">
        <v>3436.02966920914</v>
      </c>
      <c r="AO23" s="6">
        <v>3371.78783465412</v>
      </c>
      <c r="AP23" s="6">
        <v>3453.12321227512</v>
      </c>
      <c r="AQ23" s="6">
        <v>3377.72233508652</v>
      </c>
      <c r="AR23" s="6">
        <v>3417.83468910622</v>
      </c>
      <c r="AS23" s="6">
        <v>3443.67578115527</v>
      </c>
      <c r="AT23" s="6">
        <v>3490.1155470521</v>
      </c>
      <c r="AU23" s="6">
        <v>3345.04633953582</v>
      </c>
      <c r="AV23" s="6">
        <v>2191.78913706211</v>
      </c>
      <c r="AW23" s="6">
        <v>2183.80561483557</v>
      </c>
      <c r="AX23" s="6">
        <v>2222.61056611237</v>
      </c>
      <c r="AY23" s="6">
        <v>3335.36126420609</v>
      </c>
      <c r="AZ23" s="6">
        <v>3328.41223232484</v>
      </c>
      <c r="BA23" s="6">
        <v>3293.96337672215</v>
      </c>
      <c r="BB23" s="6">
        <v>3320.59427088195</v>
      </c>
      <c r="BC23" s="6">
        <v>3239.37243018843</v>
      </c>
      <c r="BD23" s="6">
        <v>3264.29376083947</v>
      </c>
      <c r="BE23" s="6">
        <v>2396.16676337271</v>
      </c>
      <c r="BF23" s="6">
        <v>2298.91657205606</v>
      </c>
      <c r="BG23" s="6">
        <v>2234.66263819522</v>
      </c>
      <c r="BH23" s="6">
        <v>2176.91157134248</v>
      </c>
      <c r="BI23" s="6">
        <v>2195.99760259513</v>
      </c>
      <c r="BJ23" s="6">
        <v>2205.8790084837</v>
      </c>
      <c r="BK23" s="6">
        <v>3193.12701977544</v>
      </c>
      <c r="BL23" s="6">
        <v>3245.09508840478</v>
      </c>
      <c r="BM23" s="6">
        <v>3162.84995052138</v>
      </c>
      <c r="BN23" s="6">
        <v>3172.65584505281</v>
      </c>
      <c r="BO23" s="6">
        <v>3086.49531851324</v>
      </c>
      <c r="BP23" s="6">
        <v>3119.8383384536</v>
      </c>
      <c r="BQ23" s="6">
        <v>2249.31436115787</v>
      </c>
      <c r="BR23" s="6">
        <v>2229.64559298393</v>
      </c>
      <c r="BS23" s="6">
        <v>2265.17240796578</v>
      </c>
      <c r="BT23" s="6">
        <v>2187.75754281753</v>
      </c>
      <c r="BU23" s="6">
        <v>2203.60689983759</v>
      </c>
      <c r="BV23" s="6">
        <v>2194.51350360079</v>
      </c>
      <c r="BW23" s="6">
        <v>3310.39069850803</v>
      </c>
      <c r="BX23" s="6">
        <v>3343.34607591266</v>
      </c>
      <c r="BY23" s="6">
        <v>3282.19186494761</v>
      </c>
      <c r="BZ23" s="6">
        <v>3278.49535442206</v>
      </c>
      <c r="CA23" s="6">
        <v>3209.13107329328</v>
      </c>
      <c r="CB23" s="6">
        <v>3269.06804130988</v>
      </c>
      <c r="CC23" s="6">
        <v>2249.04896639097</v>
      </c>
      <c r="CD23" s="6">
        <v>2235.32003916084</v>
      </c>
      <c r="CE23" s="6">
        <v>2383.25617731859</v>
      </c>
      <c r="CF23" s="6">
        <v>2191.35876026453</v>
      </c>
      <c r="CG23" s="6">
        <v>2184.10568807777</v>
      </c>
      <c r="CH23" s="6">
        <v>2173.3565357079</v>
      </c>
      <c r="CI23" s="6">
        <v>3146.40073934782</v>
      </c>
      <c r="CJ23" s="6">
        <v>3238.42842086315</v>
      </c>
      <c r="CK23" s="6">
        <v>3071.30426310551</v>
      </c>
      <c r="CL23" s="6">
        <v>3129.41785004563</v>
      </c>
      <c r="CM23" s="6">
        <v>3093.53165556467</v>
      </c>
      <c r="CN23" s="6">
        <v>2665.04011426524</v>
      </c>
      <c r="CO23" s="6">
        <v>2224.50394103642</v>
      </c>
      <c r="CP23" s="6">
        <v>2364.14631386754</v>
      </c>
      <c r="CQ23" s="6">
        <v>2333.01218468739</v>
      </c>
      <c r="CR23" s="6">
        <v>2172.39920244284</v>
      </c>
      <c r="CS23" s="6">
        <v>2189.31585066013</v>
      </c>
      <c r="CT23" s="6">
        <v>2191.74543282367</v>
      </c>
    </row>
    <row r="24" spans="2:98" ht="15" customHeight="true">
      <c r="B24" s="6">
        <v>76</v>
      </c>
      <c r="C24" s="6">
        <v>3326.38672763801</v>
      </c>
      <c r="D24" s="6">
        <v>3283.03026338781</v>
      </c>
      <c r="E24" s="6">
        <v>3368.64484652727</v>
      </c>
      <c r="F24" s="6">
        <v>3315.57981195285</v>
      </c>
      <c r="G24" s="6">
        <v>3325.72338210185</v>
      </c>
      <c r="H24" s="6">
        <v>3444.59816693248</v>
      </c>
      <c r="I24" s="6">
        <v>3349.9164915173</v>
      </c>
      <c r="J24" s="6">
        <v>3355.50295290192</v>
      </c>
      <c r="K24" s="6">
        <v>3346.66673339662</v>
      </c>
      <c r="L24" s="6">
        <v>2235.30187415726</v>
      </c>
      <c r="M24" s="6">
        <v>2185.48922354617</v>
      </c>
      <c r="N24" s="6">
        <v>2194.9189712202</v>
      </c>
      <c r="O24" s="6">
        <v>3244.08968031785</v>
      </c>
      <c r="P24" s="6">
        <v>3416.83136112129</v>
      </c>
      <c r="Q24" s="6">
        <v>3322.80499798351</v>
      </c>
      <c r="R24" s="6">
        <v>3319.39708168198</v>
      </c>
      <c r="S24" s="6">
        <v>3294.66024452424</v>
      </c>
      <c r="T24" s="6">
        <v>3347.35687771725</v>
      </c>
      <c r="U24" s="6">
        <v>3325.41703771958</v>
      </c>
      <c r="V24" s="6">
        <v>3300.07513172377</v>
      </c>
      <c r="W24" s="6">
        <v>3320.18680479745</v>
      </c>
      <c r="X24" s="6">
        <v>2198.69849507846</v>
      </c>
      <c r="Y24" s="6">
        <v>2196.78641860756</v>
      </c>
      <c r="Z24" s="6">
        <v>2175.38476171365</v>
      </c>
      <c r="AA24" s="6">
        <v>3421.30789089145</v>
      </c>
      <c r="AB24" s="6">
        <v>3501.26021747934</v>
      </c>
      <c r="AC24" s="6">
        <v>3511.03005484794</v>
      </c>
      <c r="AD24" s="6">
        <v>3452.05002971656</v>
      </c>
      <c r="AE24" s="6">
        <v>3490.09819398712</v>
      </c>
      <c r="AF24" s="6">
        <v>3567.77839499796</v>
      </c>
      <c r="AG24" s="6">
        <v>3549.48000238377</v>
      </c>
      <c r="AH24" s="6">
        <v>3468.6705441731</v>
      </c>
      <c r="AI24" s="6">
        <v>3359.50121350237</v>
      </c>
      <c r="AJ24" s="6">
        <v>2199.17957318857</v>
      </c>
      <c r="AK24" s="6">
        <v>2214.23676784697</v>
      </c>
      <c r="AL24" s="6">
        <v>2206.37447345849</v>
      </c>
      <c r="AM24" s="6">
        <v>3251.52304213269</v>
      </c>
      <c r="AN24" s="6">
        <v>3411.81998294258</v>
      </c>
      <c r="AO24" s="6">
        <v>3346.78698941856</v>
      </c>
      <c r="AP24" s="6">
        <v>3423.90530843585</v>
      </c>
      <c r="AQ24" s="6">
        <v>3349.71312446443</v>
      </c>
      <c r="AR24" s="6">
        <v>3392.76487819434</v>
      </c>
      <c r="AS24" s="6">
        <v>3415.35876935709</v>
      </c>
      <c r="AT24" s="6">
        <v>3461.57496596617</v>
      </c>
      <c r="AU24" s="6">
        <v>3318.02939198541</v>
      </c>
      <c r="AV24" s="6">
        <v>2192.00629289353</v>
      </c>
      <c r="AW24" s="6">
        <v>2183.65999177419</v>
      </c>
      <c r="AX24" s="6">
        <v>2222.60709842418</v>
      </c>
      <c r="AY24" s="6">
        <v>3304.17853694307</v>
      </c>
      <c r="AZ24" s="6">
        <v>3295.86015386422</v>
      </c>
      <c r="BA24" s="6">
        <v>3262.55305124518</v>
      </c>
      <c r="BB24" s="6">
        <v>3289.38803591172</v>
      </c>
      <c r="BC24" s="6">
        <v>3207.25775531302</v>
      </c>
      <c r="BD24" s="6">
        <v>3233.94412928505</v>
      </c>
      <c r="BE24" s="6">
        <v>2359.93502816612</v>
      </c>
      <c r="BF24" s="6">
        <v>2286.65187850339</v>
      </c>
      <c r="BG24" s="6">
        <v>2233.69680941047</v>
      </c>
      <c r="BH24" s="6">
        <v>2176.78615259249</v>
      </c>
      <c r="BI24" s="6">
        <v>2195.92362455424</v>
      </c>
      <c r="BJ24" s="6">
        <v>2206.17514305427</v>
      </c>
      <c r="BK24" s="6">
        <v>3167.57467127046</v>
      </c>
      <c r="BL24" s="6">
        <v>3218.04272099645</v>
      </c>
      <c r="BM24" s="6">
        <v>3134.97459481924</v>
      </c>
      <c r="BN24" s="6">
        <v>3146.36642924789</v>
      </c>
      <c r="BO24" s="6">
        <v>3062.22336136277</v>
      </c>
      <c r="BP24" s="6">
        <v>3094.8698007934</v>
      </c>
      <c r="BQ24" s="6">
        <v>2247.57605727875</v>
      </c>
      <c r="BR24" s="6">
        <v>2228.24704115128</v>
      </c>
      <c r="BS24" s="6">
        <v>2253.51422896444</v>
      </c>
      <c r="BT24" s="6">
        <v>2187.58388241592</v>
      </c>
      <c r="BU24" s="6">
        <v>2203.17618484579</v>
      </c>
      <c r="BV24" s="6">
        <v>2194.53710006633</v>
      </c>
      <c r="BW24" s="6">
        <v>3280.80771921785</v>
      </c>
      <c r="BX24" s="6">
        <v>3312.69231749654</v>
      </c>
      <c r="BY24" s="6">
        <v>3252.63397873736</v>
      </c>
      <c r="BZ24" s="6">
        <v>3248.5213798428</v>
      </c>
      <c r="CA24" s="6">
        <v>3178.53481624718</v>
      </c>
      <c r="CB24" s="6">
        <v>3242.73301208501</v>
      </c>
      <c r="CC24" s="6">
        <v>2247.95237392183</v>
      </c>
      <c r="CD24" s="6">
        <v>2232.96468383236</v>
      </c>
      <c r="CE24" s="6">
        <v>2354.46923183374</v>
      </c>
      <c r="CF24" s="6">
        <v>2191.23999297545</v>
      </c>
      <c r="CG24" s="6">
        <v>2183.91590494798</v>
      </c>
      <c r="CH24" s="6">
        <v>2173.08406357795</v>
      </c>
      <c r="CI24" s="6">
        <v>3122.290095332</v>
      </c>
      <c r="CJ24" s="6">
        <v>3210.61014437932</v>
      </c>
      <c r="CK24" s="6">
        <v>3046.74865360781</v>
      </c>
      <c r="CL24" s="6">
        <v>3104.35193278906</v>
      </c>
      <c r="CM24" s="6">
        <v>3066.63529497922</v>
      </c>
      <c r="CN24" s="6">
        <v>2643.92798780134</v>
      </c>
      <c r="CO24" s="6">
        <v>2223.88714245354</v>
      </c>
      <c r="CP24" s="6">
        <v>2335.98157417486</v>
      </c>
      <c r="CQ24" s="6">
        <v>2328.3589052547</v>
      </c>
      <c r="CR24" s="6">
        <v>2172.13409523119</v>
      </c>
      <c r="CS24" s="6">
        <v>2188.76214389363</v>
      </c>
      <c r="CT24" s="6">
        <v>2191.42859331235</v>
      </c>
    </row>
    <row r="25" spans="2:98" ht="15" customHeight="true">
      <c r="B25" s="6">
        <v>76.5</v>
      </c>
      <c r="C25" s="6">
        <v>3301.77518367977</v>
      </c>
      <c r="D25" s="6">
        <v>3259.92867128837</v>
      </c>
      <c r="E25" s="6">
        <v>3340.66278324572</v>
      </c>
      <c r="F25" s="6">
        <v>3288.55152416359</v>
      </c>
      <c r="G25" s="6">
        <v>3300.50855946794</v>
      </c>
      <c r="H25" s="6">
        <v>3416.27850662774</v>
      </c>
      <c r="I25" s="6">
        <v>3323.09155273216</v>
      </c>
      <c r="J25" s="6">
        <v>3329.08482123101</v>
      </c>
      <c r="K25" s="6">
        <v>3319.26972930286</v>
      </c>
      <c r="L25" s="6">
        <v>2235.89039603135</v>
      </c>
      <c r="M25" s="6">
        <v>2185.8035781861</v>
      </c>
      <c r="N25" s="6">
        <v>2195.18717486198</v>
      </c>
      <c r="O25" s="6">
        <v>3220.54824522355</v>
      </c>
      <c r="P25" s="6">
        <v>3389.7210755639</v>
      </c>
      <c r="Q25" s="6">
        <v>3297.75436386064</v>
      </c>
      <c r="R25" s="6">
        <v>3293.99443307691</v>
      </c>
      <c r="S25" s="6">
        <v>3268.68280949165</v>
      </c>
      <c r="T25" s="6">
        <v>3321.24895631596</v>
      </c>
      <c r="U25" s="6">
        <v>3300.08180506033</v>
      </c>
      <c r="V25" s="6">
        <v>3275.29877627239</v>
      </c>
      <c r="W25" s="6">
        <v>3292.6758815932</v>
      </c>
      <c r="X25" s="6">
        <v>2199.13022006921</v>
      </c>
      <c r="Y25" s="6">
        <v>2196.43828903257</v>
      </c>
      <c r="Z25" s="6">
        <v>2175.17979138157</v>
      </c>
      <c r="AA25" s="6">
        <v>3393.1585819991</v>
      </c>
      <c r="AB25" s="6">
        <v>3473.25511579543</v>
      </c>
      <c r="AC25" s="6">
        <v>3480.15664325309</v>
      </c>
      <c r="AD25" s="6">
        <v>3422.4782132616</v>
      </c>
      <c r="AE25" s="6">
        <v>3459.2909024726</v>
      </c>
      <c r="AF25" s="6">
        <v>3538.9835456087</v>
      </c>
      <c r="AG25" s="6">
        <v>3516.37101246969</v>
      </c>
      <c r="AH25" s="6">
        <v>3438.42287679204</v>
      </c>
      <c r="AI25" s="6">
        <v>3330.73769544434</v>
      </c>
      <c r="AJ25" s="6">
        <v>2198.6175203529</v>
      </c>
      <c r="AK25" s="6">
        <v>2214.5361085</v>
      </c>
      <c r="AL25" s="6">
        <v>2206.57354568511</v>
      </c>
      <c r="AM25" s="6">
        <v>3226.47591720552</v>
      </c>
      <c r="AN25" s="6">
        <v>3387.64176194397</v>
      </c>
      <c r="AO25" s="6">
        <v>3321.20437287114</v>
      </c>
      <c r="AP25" s="6">
        <v>3394.3660182586</v>
      </c>
      <c r="AQ25" s="6">
        <v>3321.85782663496</v>
      </c>
      <c r="AR25" s="6">
        <v>3367.46395820059</v>
      </c>
      <c r="AS25" s="6">
        <v>3386.7910933694</v>
      </c>
      <c r="AT25" s="6">
        <v>3433.38911138756</v>
      </c>
      <c r="AU25" s="6">
        <v>3290.62225325092</v>
      </c>
      <c r="AV25" s="6">
        <v>2192.31884489879</v>
      </c>
      <c r="AW25" s="6">
        <v>2183.69829227852</v>
      </c>
      <c r="AX25" s="6">
        <v>2222.73200159055</v>
      </c>
      <c r="AY25" s="6">
        <v>3272.92035435479</v>
      </c>
      <c r="AZ25" s="6">
        <v>3263.66996276364</v>
      </c>
      <c r="BA25" s="6">
        <v>3231.08991801106</v>
      </c>
      <c r="BB25" s="6">
        <v>3258.89263067028</v>
      </c>
      <c r="BC25" s="6">
        <v>3175.74552052305</v>
      </c>
      <c r="BD25" s="6">
        <v>3203.35300492928</v>
      </c>
      <c r="BE25" s="6">
        <v>2322.1068472915</v>
      </c>
      <c r="BF25" s="6">
        <v>2279.4622208272</v>
      </c>
      <c r="BG25" s="6">
        <v>2232.3762521578</v>
      </c>
      <c r="BH25" s="6">
        <v>2176.64500105789</v>
      </c>
      <c r="BI25" s="6">
        <v>2195.51891729796</v>
      </c>
      <c r="BJ25" s="6">
        <v>2206.35179197404</v>
      </c>
      <c r="BK25" s="6">
        <v>3141.73525044877</v>
      </c>
      <c r="BL25" s="6">
        <v>3191.27208461598</v>
      </c>
      <c r="BM25" s="6">
        <v>3107.61471077975</v>
      </c>
      <c r="BN25" s="6">
        <v>3120.58140822171</v>
      </c>
      <c r="BO25" s="6">
        <v>3038.57100415551</v>
      </c>
      <c r="BP25" s="6">
        <v>3069.95849467891</v>
      </c>
      <c r="BQ25" s="6">
        <v>2246.13143158066</v>
      </c>
      <c r="BR25" s="6">
        <v>2227.33126452547</v>
      </c>
      <c r="BS25" s="6">
        <v>2246.58396285817</v>
      </c>
      <c r="BT25" s="6">
        <v>2187.39077659068</v>
      </c>
      <c r="BU25" s="6">
        <v>2202.80206157346</v>
      </c>
      <c r="BV25" s="6">
        <v>2194.56430801221</v>
      </c>
      <c r="BW25" s="6">
        <v>3251.70990171881</v>
      </c>
      <c r="BX25" s="6">
        <v>3281.88763924882</v>
      </c>
      <c r="BY25" s="6">
        <v>3222.73068325424</v>
      </c>
      <c r="BZ25" s="6">
        <v>3218.48250379974</v>
      </c>
      <c r="CA25" s="6">
        <v>3147.98938651632</v>
      </c>
      <c r="CB25" s="6">
        <v>3216.66546549286</v>
      </c>
      <c r="CC25" s="6">
        <v>2247.1215264606</v>
      </c>
      <c r="CD25" s="6">
        <v>2230.75571912006</v>
      </c>
      <c r="CE25" s="6">
        <v>2323.92461712937</v>
      </c>
      <c r="CF25" s="6">
        <v>2191.36442010726</v>
      </c>
      <c r="CG25" s="6">
        <v>2184.0227323985</v>
      </c>
      <c r="CH25" s="6">
        <v>2173.1040124987</v>
      </c>
      <c r="CI25" s="6">
        <v>3097.74911148263</v>
      </c>
      <c r="CJ25" s="6">
        <v>3182.65476656875</v>
      </c>
      <c r="CK25" s="6">
        <v>3021.99864238242</v>
      </c>
      <c r="CL25" s="6">
        <v>3079.18753608552</v>
      </c>
      <c r="CM25" s="6">
        <v>3039.99385140697</v>
      </c>
      <c r="CN25" s="6">
        <v>2624.7497038685</v>
      </c>
      <c r="CO25" s="6">
        <v>2223.3510589071</v>
      </c>
      <c r="CP25" s="6">
        <v>2305.82311341337</v>
      </c>
      <c r="CQ25" s="6">
        <v>2324.00313963523</v>
      </c>
      <c r="CR25" s="6">
        <v>2171.80654751848</v>
      </c>
      <c r="CS25" s="6">
        <v>2188.23930124627</v>
      </c>
      <c r="CT25" s="6">
        <v>2190.7726181464</v>
      </c>
    </row>
    <row r="26" spans="2:98" ht="15" customHeight="true">
      <c r="B26" s="6">
        <v>77</v>
      </c>
      <c r="C26" s="6">
        <v>3277.01135880026</v>
      </c>
      <c r="D26" s="6">
        <v>3236.88052015553</v>
      </c>
      <c r="E26" s="6">
        <v>3312.48405432168</v>
      </c>
      <c r="F26" s="6">
        <v>3261.62270701454</v>
      </c>
      <c r="G26" s="6">
        <v>3275.40709264023</v>
      </c>
      <c r="H26" s="6">
        <v>3387.38735506534</v>
      </c>
      <c r="I26" s="6">
        <v>3295.94717786197</v>
      </c>
      <c r="J26" s="6">
        <v>3302.44897095735</v>
      </c>
      <c r="K26" s="6">
        <v>3291.43492866052</v>
      </c>
      <c r="L26" s="6">
        <v>2236.530364014</v>
      </c>
      <c r="M26" s="6">
        <v>2186.04473498791</v>
      </c>
      <c r="N26" s="6">
        <v>2195.33715886124</v>
      </c>
      <c r="O26" s="6">
        <v>3197.22175725399</v>
      </c>
      <c r="P26" s="6">
        <v>3362.71217618931</v>
      </c>
      <c r="Q26" s="6">
        <v>3273.24156430361</v>
      </c>
      <c r="R26" s="6">
        <v>3268.45882606177</v>
      </c>
      <c r="S26" s="6">
        <v>3242.59668315112</v>
      </c>
      <c r="T26" s="6">
        <v>3294.97248397296</v>
      </c>
      <c r="U26" s="6">
        <v>3274.66601332092</v>
      </c>
      <c r="V26" s="6">
        <v>3250.29354345252</v>
      </c>
      <c r="W26" s="6">
        <v>3264.25758950124</v>
      </c>
      <c r="X26" s="6">
        <v>2199.02008640651</v>
      </c>
      <c r="Y26" s="6">
        <v>2196.01124230308</v>
      </c>
      <c r="Z26" s="6">
        <v>2174.84237421809</v>
      </c>
      <c r="AA26" s="6">
        <v>3364.66212933866</v>
      </c>
      <c r="AB26" s="6">
        <v>3445.36137038307</v>
      </c>
      <c r="AC26" s="6">
        <v>3449.54684835083</v>
      </c>
      <c r="AD26" s="6">
        <v>3392.90220589228</v>
      </c>
      <c r="AE26" s="6">
        <v>3428.30594064033</v>
      </c>
      <c r="AF26" s="6">
        <v>3509.43751011129</v>
      </c>
      <c r="AG26" s="6">
        <v>3483.33708877876</v>
      </c>
      <c r="AH26" s="6">
        <v>3407.75339862911</v>
      </c>
      <c r="AI26" s="6">
        <v>3301.56893549281</v>
      </c>
      <c r="AJ26" s="6">
        <v>2197.73181434282</v>
      </c>
      <c r="AK26" s="6">
        <v>2214.48441131223</v>
      </c>
      <c r="AL26" s="6">
        <v>2206.63593293337</v>
      </c>
      <c r="AM26" s="6">
        <v>3201.824676667</v>
      </c>
      <c r="AN26" s="6">
        <v>3362.83363772352</v>
      </c>
      <c r="AO26" s="6">
        <v>3295.6008981072</v>
      </c>
      <c r="AP26" s="6">
        <v>3364.87384748763</v>
      </c>
      <c r="AQ26" s="6">
        <v>3293.87187223716</v>
      </c>
      <c r="AR26" s="6">
        <v>3342.3916346605</v>
      </c>
      <c r="AS26" s="6">
        <v>3357.82491881757</v>
      </c>
      <c r="AT26" s="6">
        <v>3404.60244997816</v>
      </c>
      <c r="AU26" s="6">
        <v>3262.50013215772</v>
      </c>
      <c r="AV26" s="6">
        <v>2192.55283113304</v>
      </c>
      <c r="AW26" s="6">
        <v>2183.61723922033</v>
      </c>
      <c r="AX26" s="6">
        <v>2223.02941203291</v>
      </c>
      <c r="AY26" s="6">
        <v>3241.33901568302</v>
      </c>
      <c r="AZ26" s="6">
        <v>3231.82590514039</v>
      </c>
      <c r="BA26" s="6">
        <v>3199.06121741937</v>
      </c>
      <c r="BB26" s="6">
        <v>3228.46136726228</v>
      </c>
      <c r="BC26" s="6">
        <v>3144.86404431104</v>
      </c>
      <c r="BD26" s="6">
        <v>3172.98639821498</v>
      </c>
      <c r="BE26" s="6">
        <v>2286.7399464487</v>
      </c>
      <c r="BF26" s="6">
        <v>2275.05548678058</v>
      </c>
      <c r="BG26" s="6">
        <v>2231.02655215906</v>
      </c>
      <c r="BH26" s="6">
        <v>2176.47469496178</v>
      </c>
      <c r="BI26" s="6">
        <v>2194.9330802517</v>
      </c>
      <c r="BJ26" s="6">
        <v>2206.5196510653</v>
      </c>
      <c r="BK26" s="6">
        <v>3116.09952333272</v>
      </c>
      <c r="BL26" s="6">
        <v>3164.06117287681</v>
      </c>
      <c r="BM26" s="6">
        <v>3080.66615569061</v>
      </c>
      <c r="BN26" s="6">
        <v>3095.00224301044</v>
      </c>
      <c r="BO26" s="6">
        <v>3015.23971370845</v>
      </c>
      <c r="BP26" s="6">
        <v>3045.17074380112</v>
      </c>
      <c r="BQ26" s="6">
        <v>2244.95699611359</v>
      </c>
      <c r="BR26" s="6">
        <v>2226.48388909269</v>
      </c>
      <c r="BS26" s="6">
        <v>2242.69554377495</v>
      </c>
      <c r="BT26" s="6">
        <v>2187.31584219115</v>
      </c>
      <c r="BU26" s="6">
        <v>2202.15246989725</v>
      </c>
      <c r="BV26" s="6">
        <v>2194.6959309967</v>
      </c>
      <c r="BW26" s="6">
        <v>3222.84065072464</v>
      </c>
      <c r="BX26" s="6">
        <v>3250.81324315533</v>
      </c>
      <c r="BY26" s="6">
        <v>3192.48319024945</v>
      </c>
      <c r="BZ26" s="6">
        <v>3188.13352911581</v>
      </c>
      <c r="CA26" s="6">
        <v>3117.53321225096</v>
      </c>
      <c r="CB26" s="6">
        <v>3190.84822102911</v>
      </c>
      <c r="CC26" s="6">
        <v>2246.5827838551</v>
      </c>
      <c r="CD26" s="6">
        <v>2228.37991829924</v>
      </c>
      <c r="CE26" s="6">
        <v>2293.50020155712</v>
      </c>
      <c r="CF26" s="6">
        <v>2191.48265312656</v>
      </c>
      <c r="CG26" s="6">
        <v>2184.45414694473</v>
      </c>
      <c r="CH26" s="6">
        <v>2173.04183151527</v>
      </c>
      <c r="CI26" s="6">
        <v>3073.03592559572</v>
      </c>
      <c r="CJ26" s="6">
        <v>3154.58299025809</v>
      </c>
      <c r="CK26" s="6">
        <v>2997.37937868902</v>
      </c>
      <c r="CL26" s="6">
        <v>3054.22627198819</v>
      </c>
      <c r="CM26" s="6">
        <v>3013.4288041603</v>
      </c>
      <c r="CN26" s="6">
        <v>2606.71675226067</v>
      </c>
      <c r="CO26" s="6">
        <v>2222.90061689159</v>
      </c>
      <c r="CP26" s="6">
        <v>2275.90634392677</v>
      </c>
      <c r="CQ26" s="6">
        <v>2319.85534324074</v>
      </c>
      <c r="CR26" s="6">
        <v>2171.54686792251</v>
      </c>
      <c r="CS26" s="6">
        <v>2187.58678289668</v>
      </c>
      <c r="CT26" s="6">
        <v>2190.21748362567</v>
      </c>
    </row>
    <row r="27" spans="2:98" ht="15" customHeight="true">
      <c r="B27" s="6">
        <v>77.5</v>
      </c>
      <c r="C27" s="6">
        <v>3251.92635263926</v>
      </c>
      <c r="D27" s="6">
        <v>3213.84119190448</v>
      </c>
      <c r="E27" s="6">
        <v>3283.95816703715</v>
      </c>
      <c r="F27" s="6">
        <v>3234.48142130256</v>
      </c>
      <c r="G27" s="6">
        <v>3249.6816495182</v>
      </c>
      <c r="H27" s="6">
        <v>3357.97351064427</v>
      </c>
      <c r="I27" s="6">
        <v>3268.32938313094</v>
      </c>
      <c r="J27" s="6">
        <v>3275.68497726321</v>
      </c>
      <c r="K27" s="6">
        <v>3263.11355925298</v>
      </c>
      <c r="L27" s="6">
        <v>2236.93745021388</v>
      </c>
      <c r="M27" s="6">
        <v>2186.24126051847</v>
      </c>
      <c r="N27" s="6">
        <v>2195.09712603221</v>
      </c>
      <c r="O27" s="6">
        <v>3173.75802467655</v>
      </c>
      <c r="P27" s="6">
        <v>3335.45816220955</v>
      </c>
      <c r="Q27" s="6">
        <v>3248.29810550458</v>
      </c>
      <c r="R27" s="6">
        <v>3242.70702326848</v>
      </c>
      <c r="S27" s="6">
        <v>3216.32629931322</v>
      </c>
      <c r="T27" s="6">
        <v>3268.18010153098</v>
      </c>
      <c r="U27" s="6">
        <v>3248.70851469028</v>
      </c>
      <c r="V27" s="6">
        <v>3224.88801913771</v>
      </c>
      <c r="W27" s="6">
        <v>3235.74212763404</v>
      </c>
      <c r="X27" s="6">
        <v>2198.78348863009</v>
      </c>
      <c r="Y27" s="6">
        <v>2195.6296707845</v>
      </c>
      <c r="Z27" s="6">
        <v>2174.78672839742</v>
      </c>
      <c r="AA27" s="6">
        <v>3336.07906650864</v>
      </c>
      <c r="AB27" s="6">
        <v>3417.62610943288</v>
      </c>
      <c r="AC27" s="6">
        <v>3418.89288386827</v>
      </c>
      <c r="AD27" s="6">
        <v>3363.67619481627</v>
      </c>
      <c r="AE27" s="6">
        <v>3397.12179960231</v>
      </c>
      <c r="AF27" s="6">
        <v>3479.00338012547</v>
      </c>
      <c r="AG27" s="6">
        <v>3450.48200838739</v>
      </c>
      <c r="AH27" s="6">
        <v>3376.57201247462</v>
      </c>
      <c r="AI27" s="6">
        <v>3272.1972653329</v>
      </c>
      <c r="AJ27" s="6">
        <v>2197.17725449099</v>
      </c>
      <c r="AK27" s="6">
        <v>2214.34553587651</v>
      </c>
      <c r="AL27" s="6">
        <v>2206.58715217139</v>
      </c>
      <c r="AM27" s="6">
        <v>3177.74637176379</v>
      </c>
      <c r="AN27" s="6">
        <v>3337.25146267906</v>
      </c>
      <c r="AO27" s="6">
        <v>3269.43473985719</v>
      </c>
      <c r="AP27" s="6">
        <v>3335.30026099999</v>
      </c>
      <c r="AQ27" s="6">
        <v>3265.72694237381</v>
      </c>
      <c r="AR27" s="6">
        <v>3316.18583621518</v>
      </c>
      <c r="AS27" s="6">
        <v>3328.27952065213</v>
      </c>
      <c r="AT27" s="6">
        <v>3375.20139582857</v>
      </c>
      <c r="AU27" s="6">
        <v>3234.52190385735</v>
      </c>
      <c r="AV27" s="6">
        <v>2192.41618207254</v>
      </c>
      <c r="AW27" s="6">
        <v>2183.4815640602</v>
      </c>
      <c r="AX27" s="6">
        <v>2222.82615609719</v>
      </c>
      <c r="AY27" s="6">
        <v>3209.70602127563</v>
      </c>
      <c r="AZ27" s="6">
        <v>3200.34176943912</v>
      </c>
      <c r="BA27" s="6">
        <v>3166.72002558421</v>
      </c>
      <c r="BB27" s="6">
        <v>3197.7415978651</v>
      </c>
      <c r="BC27" s="6">
        <v>3114.5426025015</v>
      </c>
      <c r="BD27" s="6">
        <v>3142.45595913386</v>
      </c>
      <c r="BE27" s="6">
        <v>2257.30319053475</v>
      </c>
      <c r="BF27" s="6">
        <v>2271.9462053886</v>
      </c>
      <c r="BG27" s="6">
        <v>2229.4687890324</v>
      </c>
      <c r="BH27" s="6">
        <v>2176.38553983129</v>
      </c>
      <c r="BI27" s="6">
        <v>2194.46615028346</v>
      </c>
      <c r="BJ27" s="6">
        <v>2206.49965098108</v>
      </c>
      <c r="BK27" s="6">
        <v>3090.09477461754</v>
      </c>
      <c r="BL27" s="6">
        <v>3136.37433650826</v>
      </c>
      <c r="BM27" s="6">
        <v>3054.39997015134</v>
      </c>
      <c r="BN27" s="6">
        <v>3069.38206591952</v>
      </c>
      <c r="BO27" s="6">
        <v>2991.61103473501</v>
      </c>
      <c r="BP27" s="6">
        <v>3020.05424589631</v>
      </c>
      <c r="BQ27" s="6">
        <v>2243.70504337231</v>
      </c>
      <c r="BR27" s="6">
        <v>2225.13965049948</v>
      </c>
      <c r="BS27" s="6">
        <v>2240.2193228315</v>
      </c>
      <c r="BT27" s="6">
        <v>2187.2008773207</v>
      </c>
      <c r="BU27" s="6">
        <v>2201.40737019686</v>
      </c>
      <c r="BV27" s="6">
        <v>2194.54394213838</v>
      </c>
      <c r="BW27" s="6">
        <v>3194.20097043345</v>
      </c>
      <c r="BX27" s="6">
        <v>3219.68197577246</v>
      </c>
      <c r="BY27" s="6">
        <v>3161.87110181</v>
      </c>
      <c r="BZ27" s="6">
        <v>3157.14326140956</v>
      </c>
      <c r="CA27" s="6">
        <v>3087.46354687044</v>
      </c>
      <c r="CB27" s="6">
        <v>3164.8148486131</v>
      </c>
      <c r="CC27" s="6">
        <v>2246.15086772408</v>
      </c>
      <c r="CD27" s="6">
        <v>2225.87363043268</v>
      </c>
      <c r="CE27" s="6">
        <v>2266.61636980891</v>
      </c>
      <c r="CF27" s="6">
        <v>2191.17730045549</v>
      </c>
      <c r="CG27" s="6">
        <v>2184.50861042248</v>
      </c>
      <c r="CH27" s="6">
        <v>2172.99365468514</v>
      </c>
      <c r="CI27" s="6">
        <v>3047.82670864988</v>
      </c>
      <c r="CJ27" s="6">
        <v>3126.96880174017</v>
      </c>
      <c r="CK27" s="6">
        <v>2973.07030471046</v>
      </c>
      <c r="CL27" s="6">
        <v>3028.92470911273</v>
      </c>
      <c r="CM27" s="6">
        <v>2987.06132624613</v>
      </c>
      <c r="CN27" s="6">
        <v>2589.07810514904</v>
      </c>
      <c r="CO27" s="6">
        <v>2222.5868223897</v>
      </c>
      <c r="CP27" s="6">
        <v>2250.21561236683</v>
      </c>
      <c r="CQ27" s="6">
        <v>2315.32878200329</v>
      </c>
      <c r="CR27" s="6">
        <v>2170.89247002373</v>
      </c>
      <c r="CS27" s="6">
        <v>2186.85028230621</v>
      </c>
      <c r="CT27" s="6">
        <v>2189.59360214586</v>
      </c>
    </row>
    <row r="28" spans="2:98" ht="15" customHeight="true">
      <c r="B28" s="6">
        <v>78</v>
      </c>
      <c r="C28" s="6">
        <v>3226.05392518591</v>
      </c>
      <c r="D28" s="6">
        <v>3190.10771654618</v>
      </c>
      <c r="E28" s="6">
        <v>3254.98270661964</v>
      </c>
      <c r="F28" s="6">
        <v>3207.63939843318</v>
      </c>
      <c r="G28" s="6">
        <v>3222.98613771694</v>
      </c>
      <c r="H28" s="6">
        <v>3328.19925981396</v>
      </c>
      <c r="I28" s="6">
        <v>3240.22319647386</v>
      </c>
      <c r="J28" s="6">
        <v>3248.60549392305</v>
      </c>
      <c r="K28" s="6">
        <v>3234.3825126285</v>
      </c>
      <c r="L28" s="6">
        <v>2236.55537690164</v>
      </c>
      <c r="M28" s="6">
        <v>2186.17331692887</v>
      </c>
      <c r="N28" s="6">
        <v>2194.8744554912</v>
      </c>
      <c r="O28" s="6">
        <v>3149.81296319202</v>
      </c>
      <c r="P28" s="6">
        <v>3308.02330282362</v>
      </c>
      <c r="Q28" s="6">
        <v>3223.04730674056</v>
      </c>
      <c r="R28" s="6">
        <v>3216.47452374426</v>
      </c>
      <c r="S28" s="6">
        <v>3189.59100890501</v>
      </c>
      <c r="T28" s="6">
        <v>3240.87564221559</v>
      </c>
      <c r="U28" s="6">
        <v>3222.25978279586</v>
      </c>
      <c r="V28" s="6">
        <v>3199.03698338152</v>
      </c>
      <c r="W28" s="6">
        <v>3207.24816477177</v>
      </c>
      <c r="X28" s="6">
        <v>2198.44121654913</v>
      </c>
      <c r="Y28" s="6">
        <v>2195.26344942983</v>
      </c>
      <c r="Z28" s="6">
        <v>2174.5724306354</v>
      </c>
      <c r="AA28" s="6">
        <v>3307.43898653852</v>
      </c>
      <c r="AB28" s="6">
        <v>3389.83315361595</v>
      </c>
      <c r="AC28" s="6">
        <v>3387.79589461943</v>
      </c>
      <c r="AD28" s="6">
        <v>3333.90692064224</v>
      </c>
      <c r="AE28" s="6">
        <v>3365.36360296482</v>
      </c>
      <c r="AF28" s="6">
        <v>3448.20186994276</v>
      </c>
      <c r="AG28" s="6">
        <v>3417.52674555463</v>
      </c>
      <c r="AH28" s="6">
        <v>3344.72288070336</v>
      </c>
      <c r="AI28" s="6">
        <v>3242.9347845666</v>
      </c>
      <c r="AJ28" s="6">
        <v>2196.45247706324</v>
      </c>
      <c r="AK28" s="6">
        <v>2214.1182031604</v>
      </c>
      <c r="AL28" s="6">
        <v>2206.28590891617</v>
      </c>
      <c r="AM28" s="6">
        <v>3153.64581920493</v>
      </c>
      <c r="AN28" s="6">
        <v>3311.03136737376</v>
      </c>
      <c r="AO28" s="6">
        <v>3243.05875396796</v>
      </c>
      <c r="AP28" s="6">
        <v>3305.59839531186</v>
      </c>
      <c r="AQ28" s="6">
        <v>3237.10783723835</v>
      </c>
      <c r="AR28" s="6">
        <v>3289.5931370422</v>
      </c>
      <c r="AS28" s="6">
        <v>3298.3118664213</v>
      </c>
      <c r="AT28" s="6">
        <v>3345.2046645237</v>
      </c>
      <c r="AU28" s="6">
        <v>3206.46199760664</v>
      </c>
      <c r="AV28" s="6">
        <v>2191.80171782984</v>
      </c>
      <c r="AW28" s="6">
        <v>2183.38632191302</v>
      </c>
      <c r="AX28" s="6">
        <v>2222.39036412671</v>
      </c>
      <c r="AY28" s="6">
        <v>3177.87184371009</v>
      </c>
      <c r="AZ28" s="6">
        <v>3168.875962135</v>
      </c>
      <c r="BA28" s="6">
        <v>3134.26095388763</v>
      </c>
      <c r="BB28" s="6">
        <v>3166.9960449541</v>
      </c>
      <c r="BC28" s="6">
        <v>3084.71679996052</v>
      </c>
      <c r="BD28" s="6">
        <v>3112.29902727472</v>
      </c>
      <c r="BE28" s="6">
        <v>2235.73178920353</v>
      </c>
      <c r="BF28" s="6">
        <v>2269.15063735934</v>
      </c>
      <c r="BG28" s="6">
        <v>2227.73361307269</v>
      </c>
      <c r="BH28" s="6">
        <v>2175.78661422185</v>
      </c>
      <c r="BI28" s="6">
        <v>2193.99826224685</v>
      </c>
      <c r="BJ28" s="6">
        <v>2206.01755132723</v>
      </c>
      <c r="BK28" s="6">
        <v>3063.71638648369</v>
      </c>
      <c r="BL28" s="6">
        <v>3108.3045381965</v>
      </c>
      <c r="BM28" s="6">
        <v>3028.2727283045</v>
      </c>
      <c r="BN28" s="6">
        <v>3043.23267102642</v>
      </c>
      <c r="BO28" s="6">
        <v>2967.41263681684</v>
      </c>
      <c r="BP28" s="6">
        <v>2994.37912352927</v>
      </c>
      <c r="BQ28" s="6">
        <v>2242.06133076643</v>
      </c>
      <c r="BR28" s="6">
        <v>2223.84750987166</v>
      </c>
      <c r="BS28" s="6">
        <v>2237.88717662725</v>
      </c>
      <c r="BT28" s="6">
        <v>2186.98436752035</v>
      </c>
      <c r="BU28" s="6">
        <v>2200.74159224692</v>
      </c>
      <c r="BV28" s="6">
        <v>2194.48067778506</v>
      </c>
      <c r="BW28" s="6">
        <v>3165.24243134035</v>
      </c>
      <c r="BX28" s="6">
        <v>3188.03488319224</v>
      </c>
      <c r="BY28" s="6">
        <v>3131.19128355641</v>
      </c>
      <c r="BZ28" s="6">
        <v>3126.18640796087</v>
      </c>
      <c r="CA28" s="6">
        <v>3057.86023236017</v>
      </c>
      <c r="CB28" s="6">
        <v>3138.11854327265</v>
      </c>
      <c r="CC28" s="6">
        <v>2245.63471969451</v>
      </c>
      <c r="CD28" s="6">
        <v>2223.62970131712</v>
      </c>
      <c r="CE28" s="6">
        <v>2245.60349228567</v>
      </c>
      <c r="CF28" s="6">
        <v>2190.89200103239</v>
      </c>
      <c r="CG28" s="6">
        <v>2184.46991431664</v>
      </c>
      <c r="CH28" s="6">
        <v>2172.8880374032</v>
      </c>
      <c r="CI28" s="6">
        <v>3022.02272838426</v>
      </c>
      <c r="CJ28" s="6">
        <v>3098.86792848708</v>
      </c>
      <c r="CK28" s="6">
        <v>2948.13653540192</v>
      </c>
      <c r="CL28" s="6">
        <v>3003.52000834174</v>
      </c>
      <c r="CM28" s="6">
        <v>2960.90986341151</v>
      </c>
      <c r="CN28" s="6">
        <v>2571.45535977831</v>
      </c>
      <c r="CO28" s="6">
        <v>2222.02427388665</v>
      </c>
      <c r="CP28" s="6">
        <v>2230.74585514825</v>
      </c>
      <c r="CQ28" s="6">
        <v>2310.84989630403</v>
      </c>
      <c r="CR28" s="6">
        <v>2170.03811886026</v>
      </c>
      <c r="CS28" s="6">
        <v>2186.16423454496</v>
      </c>
      <c r="CT28" s="6">
        <v>2188.77277079813</v>
      </c>
    </row>
    <row r="29" spans="2:98" ht="15" customHeight="true">
      <c r="B29" s="6">
        <v>78.5</v>
      </c>
      <c r="C29" s="6">
        <v>3199.28356382066</v>
      </c>
      <c r="D29" s="6">
        <v>3165.68048789088</v>
      </c>
      <c r="E29" s="6">
        <v>3225.8397183658</v>
      </c>
      <c r="F29" s="6">
        <v>3180.06726393144</v>
      </c>
      <c r="G29" s="6">
        <v>3195.39808217504</v>
      </c>
      <c r="H29" s="6">
        <v>3297.69402581107</v>
      </c>
      <c r="I29" s="6">
        <v>3211.78106200499</v>
      </c>
      <c r="J29" s="6">
        <v>3220.92013974045</v>
      </c>
      <c r="K29" s="6">
        <v>3205.38729526239</v>
      </c>
      <c r="L29" s="6">
        <v>2235.7528927336</v>
      </c>
      <c r="M29" s="6">
        <v>2185.52088864244</v>
      </c>
      <c r="N29" s="6">
        <v>2194.74850817936</v>
      </c>
      <c r="O29" s="6">
        <v>3125.52630606554</v>
      </c>
      <c r="P29" s="6">
        <v>3279.86462855254</v>
      </c>
      <c r="Q29" s="6">
        <v>3197.03642394389</v>
      </c>
      <c r="R29" s="6">
        <v>3189.61662606732</v>
      </c>
      <c r="S29" s="6">
        <v>3162.78798640274</v>
      </c>
      <c r="T29" s="6">
        <v>3213.28758968235</v>
      </c>
      <c r="U29" s="6">
        <v>3195.28989377553</v>
      </c>
      <c r="V29" s="6">
        <v>3172.75382478178</v>
      </c>
      <c r="W29" s="6">
        <v>3178.24905500596</v>
      </c>
      <c r="X29" s="6">
        <v>2198.21294937357</v>
      </c>
      <c r="Y29" s="6">
        <v>2194.77549535868</v>
      </c>
      <c r="Z29" s="6">
        <v>2174.41347268791</v>
      </c>
      <c r="AA29" s="6">
        <v>3278.53787486605</v>
      </c>
      <c r="AB29" s="6">
        <v>3361.19854385032</v>
      </c>
      <c r="AC29" s="6">
        <v>3355.94871903327</v>
      </c>
      <c r="AD29" s="6">
        <v>3303.57855781177</v>
      </c>
      <c r="AE29" s="6">
        <v>3333.08165485186</v>
      </c>
      <c r="AF29" s="6">
        <v>3417.01730407039</v>
      </c>
      <c r="AG29" s="6">
        <v>3384.27519753504</v>
      </c>
      <c r="AH29" s="6">
        <v>3312.18224609284</v>
      </c>
      <c r="AI29" s="6">
        <v>3213.16202216817</v>
      </c>
      <c r="AJ29" s="6">
        <v>2196.01624516894</v>
      </c>
      <c r="AK29" s="6">
        <v>2213.9477160808</v>
      </c>
      <c r="AL29" s="6">
        <v>2205.95342482133</v>
      </c>
      <c r="AM29" s="6">
        <v>3128.92286457066</v>
      </c>
      <c r="AN29" s="6">
        <v>3283.50403357907</v>
      </c>
      <c r="AO29" s="6">
        <v>3215.60941316822</v>
      </c>
      <c r="AP29" s="6">
        <v>3275.93592991231</v>
      </c>
      <c r="AQ29" s="6">
        <v>3208.23354913779</v>
      </c>
      <c r="AR29" s="6">
        <v>3262.32371572653</v>
      </c>
      <c r="AS29" s="6">
        <v>3268.30969748961</v>
      </c>
      <c r="AT29" s="6">
        <v>3314.89503632693</v>
      </c>
      <c r="AU29" s="6">
        <v>3177.75800315016</v>
      </c>
      <c r="AV29" s="6">
        <v>2191.31336607939</v>
      </c>
      <c r="AW29" s="6">
        <v>2183.53716535429</v>
      </c>
      <c r="AX29" s="6">
        <v>2221.75995585924</v>
      </c>
      <c r="AY29" s="6">
        <v>3145.90708800705</v>
      </c>
      <c r="AZ29" s="6">
        <v>3136.99081561238</v>
      </c>
      <c r="BA29" s="6">
        <v>3101.58799299953</v>
      </c>
      <c r="BB29" s="6">
        <v>3135.93633202103</v>
      </c>
      <c r="BC29" s="6">
        <v>3055.01337326379</v>
      </c>
      <c r="BD29" s="6">
        <v>3082.26494961203</v>
      </c>
      <c r="BE29" s="6">
        <v>2221.66848501095</v>
      </c>
      <c r="BF29" s="6">
        <v>2266.38605759734</v>
      </c>
      <c r="BG29" s="6">
        <v>2225.8170846595</v>
      </c>
      <c r="BH29" s="6">
        <v>2175.06757386925</v>
      </c>
      <c r="BI29" s="6">
        <v>2193.14136272574</v>
      </c>
      <c r="BJ29" s="6">
        <v>2205.3728289124</v>
      </c>
      <c r="BK29" s="6">
        <v>3036.54031324744</v>
      </c>
      <c r="BL29" s="6">
        <v>3080.20016606169</v>
      </c>
      <c r="BM29" s="6">
        <v>3002.24810525706</v>
      </c>
      <c r="BN29" s="6">
        <v>3016.60061649599</v>
      </c>
      <c r="BO29" s="6">
        <v>2942.27277656783</v>
      </c>
      <c r="BP29" s="6">
        <v>2968.1824433117</v>
      </c>
      <c r="BQ29" s="6">
        <v>2240.0171872489</v>
      </c>
      <c r="BR29" s="6">
        <v>2222.6338654043</v>
      </c>
      <c r="BS29" s="6">
        <v>2235.88937425408</v>
      </c>
      <c r="BT29" s="6">
        <v>2186.76557693616</v>
      </c>
      <c r="BU29" s="6">
        <v>2200.35026869475</v>
      </c>
      <c r="BV29" s="6">
        <v>2193.76223332112</v>
      </c>
      <c r="BW29" s="6">
        <v>3135.73858655434</v>
      </c>
      <c r="BX29" s="6">
        <v>3156.48503342114</v>
      </c>
      <c r="BY29" s="6">
        <v>3100.13972785115</v>
      </c>
      <c r="BZ29" s="6">
        <v>3094.99456500306</v>
      </c>
      <c r="CA29" s="6">
        <v>3028.36831467089</v>
      </c>
      <c r="CB29" s="6">
        <v>3111.10345546573</v>
      </c>
      <c r="CC29" s="6">
        <v>2245.06754881187</v>
      </c>
      <c r="CD29" s="6">
        <v>2221.59588890862</v>
      </c>
      <c r="CE29" s="6">
        <v>2230.95919660689</v>
      </c>
      <c r="CF29" s="6">
        <v>2190.34137863685</v>
      </c>
      <c r="CG29" s="6">
        <v>2184.21364087873</v>
      </c>
      <c r="CH29" s="6">
        <v>2172.95837223763</v>
      </c>
      <c r="CI29" s="6">
        <v>2995.8580934339</v>
      </c>
      <c r="CJ29" s="6">
        <v>3070.97036212776</v>
      </c>
      <c r="CK29" s="6">
        <v>2923.01295714421</v>
      </c>
      <c r="CL29" s="6">
        <v>2977.36376496178</v>
      </c>
      <c r="CM29" s="6">
        <v>2934.91772947885</v>
      </c>
      <c r="CN29" s="6">
        <v>2553.74395957346</v>
      </c>
      <c r="CO29" s="6">
        <v>2221.06540456972</v>
      </c>
      <c r="CP29" s="6">
        <v>2217.84688713608</v>
      </c>
      <c r="CQ29" s="6">
        <v>2306.57508118685</v>
      </c>
      <c r="CR29" s="6">
        <v>2169.50431456017</v>
      </c>
      <c r="CS29" s="6">
        <v>2185.57551787011</v>
      </c>
      <c r="CT29" s="6">
        <v>2188.21809950994</v>
      </c>
    </row>
    <row r="30" spans="2:98" ht="15" customHeight="true">
      <c r="B30" s="6">
        <v>79</v>
      </c>
      <c r="C30" s="6">
        <v>3171.54399392673</v>
      </c>
      <c r="D30" s="6">
        <v>3140.50977468344</v>
      </c>
      <c r="E30" s="6">
        <v>3195.81375375484</v>
      </c>
      <c r="F30" s="6">
        <v>3152.01657001783</v>
      </c>
      <c r="G30" s="6">
        <v>3166.86926959516</v>
      </c>
      <c r="H30" s="6">
        <v>3266.99281276384</v>
      </c>
      <c r="I30" s="6">
        <v>3182.62190672119</v>
      </c>
      <c r="J30" s="6">
        <v>3191.77426079945</v>
      </c>
      <c r="K30" s="6">
        <v>3175.85023445925</v>
      </c>
      <c r="L30" s="6">
        <v>2234.72181506499</v>
      </c>
      <c r="M30" s="6">
        <v>2184.79920722837</v>
      </c>
      <c r="N30" s="6">
        <v>2194.10696734022</v>
      </c>
      <c r="O30" s="6">
        <v>3101.10340725532</v>
      </c>
      <c r="P30" s="6">
        <v>3251.35984401737</v>
      </c>
      <c r="Q30" s="6">
        <v>3170.02489317733</v>
      </c>
      <c r="R30" s="6">
        <v>3161.99497754394</v>
      </c>
      <c r="S30" s="6">
        <v>3134.82471262934</v>
      </c>
      <c r="T30" s="6">
        <v>3185.24344142143</v>
      </c>
      <c r="U30" s="6">
        <v>3167.54163320467</v>
      </c>
      <c r="V30" s="6">
        <v>3145.68866346238</v>
      </c>
      <c r="W30" s="6">
        <v>3148.84709785777</v>
      </c>
      <c r="X30" s="6">
        <v>2197.50937369634</v>
      </c>
      <c r="Y30" s="6">
        <v>2194.33150478751</v>
      </c>
      <c r="Z30" s="6">
        <v>2174.16969528125</v>
      </c>
      <c r="AA30" s="6">
        <v>3249.25084036006</v>
      </c>
      <c r="AB30" s="6">
        <v>3331.38873939545</v>
      </c>
      <c r="AC30" s="6">
        <v>3323.1060257958</v>
      </c>
      <c r="AD30" s="6">
        <v>3272.08383002619</v>
      </c>
      <c r="AE30" s="6">
        <v>3299.91169027895</v>
      </c>
      <c r="AF30" s="6">
        <v>3384.9341349237</v>
      </c>
      <c r="AG30" s="6">
        <v>3350.21692827918</v>
      </c>
      <c r="AH30" s="6">
        <v>3278.43973992846</v>
      </c>
      <c r="AI30" s="6">
        <v>3182.2847438373</v>
      </c>
      <c r="AJ30" s="6">
        <v>2195.68845312131</v>
      </c>
      <c r="AK30" s="6">
        <v>2213.47487387084</v>
      </c>
      <c r="AL30" s="6">
        <v>2205.17300424865</v>
      </c>
      <c r="AM30" s="6">
        <v>3103.64985473612</v>
      </c>
      <c r="AN30" s="6">
        <v>3254.95402426515</v>
      </c>
      <c r="AO30" s="6">
        <v>3187.39225757322</v>
      </c>
      <c r="AP30" s="6">
        <v>3245.76254972004</v>
      </c>
      <c r="AQ30" s="6">
        <v>3178.54756644794</v>
      </c>
      <c r="AR30" s="6">
        <v>3234.13120800876</v>
      </c>
      <c r="AS30" s="6">
        <v>3237.89775226977</v>
      </c>
      <c r="AT30" s="6">
        <v>3283.43308528034</v>
      </c>
      <c r="AU30" s="6">
        <v>3148.40954647423</v>
      </c>
      <c r="AV30" s="6">
        <v>2190.63537664169</v>
      </c>
      <c r="AW30" s="6">
        <v>2183.20702443256</v>
      </c>
      <c r="AX30" s="6">
        <v>2220.91626081928</v>
      </c>
      <c r="AY30" s="6">
        <v>3112.96240694136</v>
      </c>
      <c r="AZ30" s="6">
        <v>3104.62765257264</v>
      </c>
      <c r="BA30" s="6">
        <v>3068.24169677467</v>
      </c>
      <c r="BB30" s="6">
        <v>3103.6460282798</v>
      </c>
      <c r="BC30" s="6">
        <v>3024.82714592743</v>
      </c>
      <c r="BD30" s="6">
        <v>3052.34170434586</v>
      </c>
      <c r="BE30" s="6">
        <v>2213.57323614009</v>
      </c>
      <c r="BF30" s="6">
        <v>2263.51790051301</v>
      </c>
      <c r="BG30" s="6">
        <v>2224.1139409202</v>
      </c>
      <c r="BH30" s="6">
        <v>2174.2285797482</v>
      </c>
      <c r="BI30" s="6">
        <v>2192.54336251638</v>
      </c>
      <c r="BJ30" s="6">
        <v>2204.63900893377</v>
      </c>
      <c r="BK30" s="6">
        <v>3008.5337644648</v>
      </c>
      <c r="BL30" s="6">
        <v>3051.26897359349</v>
      </c>
      <c r="BM30" s="6">
        <v>2975.78857728812</v>
      </c>
      <c r="BN30" s="6">
        <v>2989.16529136706</v>
      </c>
      <c r="BO30" s="6">
        <v>2916.26611946515</v>
      </c>
      <c r="BP30" s="6">
        <v>2941.51411851785</v>
      </c>
      <c r="BQ30" s="6">
        <v>2238.03028512173</v>
      </c>
      <c r="BR30" s="6">
        <v>2221.12151903094</v>
      </c>
      <c r="BS30" s="6">
        <v>2233.94568118358</v>
      </c>
      <c r="BT30" s="6">
        <v>2186.59968744271</v>
      </c>
      <c r="BU30" s="6">
        <v>2199.85726337124</v>
      </c>
      <c r="BV30" s="6">
        <v>2193.07052674378</v>
      </c>
      <c r="BW30" s="6">
        <v>3105.33572204411</v>
      </c>
      <c r="BX30" s="6">
        <v>3124.26796231933</v>
      </c>
      <c r="BY30" s="6">
        <v>3068.47961035964</v>
      </c>
      <c r="BZ30" s="6">
        <v>3063.50809408999</v>
      </c>
      <c r="CA30" s="6">
        <v>2998.13794863869</v>
      </c>
      <c r="CB30" s="6">
        <v>3083.30331876318</v>
      </c>
      <c r="CC30" s="6">
        <v>2244.05810050971</v>
      </c>
      <c r="CD30" s="6">
        <v>2219.34424606684</v>
      </c>
      <c r="CE30" s="6">
        <v>2221.94524945705</v>
      </c>
      <c r="CF30" s="6">
        <v>2189.6644859632</v>
      </c>
      <c r="CG30" s="6">
        <v>2183.62836148297</v>
      </c>
      <c r="CH30" s="6">
        <v>2172.47692566462</v>
      </c>
      <c r="CI30" s="6">
        <v>2969.05259452328</v>
      </c>
      <c r="CJ30" s="6">
        <v>3042.66211524652</v>
      </c>
      <c r="CK30" s="6">
        <v>2897.24959533297</v>
      </c>
      <c r="CL30" s="6">
        <v>2950.53425574161</v>
      </c>
      <c r="CM30" s="6">
        <v>2908.13758056506</v>
      </c>
      <c r="CN30" s="6">
        <v>2535.32023330714</v>
      </c>
      <c r="CO30" s="6">
        <v>2219.92632179964</v>
      </c>
      <c r="CP30" s="6">
        <v>2210.04730322076</v>
      </c>
      <c r="CQ30" s="6">
        <v>2302.13805474578</v>
      </c>
      <c r="CR30" s="6">
        <v>2168.80135360658</v>
      </c>
      <c r="CS30" s="6">
        <v>2184.87998353966</v>
      </c>
      <c r="CT30" s="6">
        <v>2187.76149424727</v>
      </c>
    </row>
    <row r="31" spans="2:98" ht="15" customHeight="true">
      <c r="B31" s="6">
        <v>79.5</v>
      </c>
      <c r="C31" s="6">
        <v>3142.9372187884</v>
      </c>
      <c r="D31" s="6">
        <v>3114.36317563261</v>
      </c>
      <c r="E31" s="6">
        <v>3164.15137019994</v>
      </c>
      <c r="F31" s="6">
        <v>3122.7305522753</v>
      </c>
      <c r="G31" s="6">
        <v>3136.53975224438</v>
      </c>
      <c r="H31" s="6">
        <v>3234.9275655041</v>
      </c>
      <c r="I31" s="6">
        <v>3152.23269032042</v>
      </c>
      <c r="J31" s="6">
        <v>3161.04840166784</v>
      </c>
      <c r="K31" s="6">
        <v>3144.6746030869</v>
      </c>
      <c r="L31" s="6">
        <v>2233.76292681519</v>
      </c>
      <c r="M31" s="6">
        <v>2183.95382038376</v>
      </c>
      <c r="N31" s="6">
        <v>2193.67652668791</v>
      </c>
      <c r="O31" s="6">
        <v>3075.52489167353</v>
      </c>
      <c r="P31" s="6">
        <v>3221.60434812523</v>
      </c>
      <c r="Q31" s="6">
        <v>3141.03549337714</v>
      </c>
      <c r="R31" s="6">
        <v>3132.59521799228</v>
      </c>
      <c r="S31" s="6">
        <v>3105.54910147242</v>
      </c>
      <c r="T31" s="6">
        <v>3155.92562512201</v>
      </c>
      <c r="U31" s="6">
        <v>3137.76119437919</v>
      </c>
      <c r="V31" s="6">
        <v>3116.61900201625</v>
      </c>
      <c r="W31" s="6">
        <v>3117.83612977375</v>
      </c>
      <c r="X31" s="6">
        <v>2197.26208914859</v>
      </c>
      <c r="Y31" s="6">
        <v>2194.22117106712</v>
      </c>
      <c r="Z31" s="6">
        <v>2174.14692397161</v>
      </c>
      <c r="AA31" s="6">
        <v>3219.20734393261</v>
      </c>
      <c r="AB31" s="6">
        <v>3300.12404046327</v>
      </c>
      <c r="AC31" s="6">
        <v>3288.09742617136</v>
      </c>
      <c r="AD31" s="6">
        <v>3238.65368263159</v>
      </c>
      <c r="AE31" s="6">
        <v>3264.77499426185</v>
      </c>
      <c r="AF31" s="6">
        <v>3351.73060988964</v>
      </c>
      <c r="AG31" s="6">
        <v>3314.08665676589</v>
      </c>
      <c r="AH31" s="6">
        <v>3242.58544267494</v>
      </c>
      <c r="AI31" s="6">
        <v>3149.52137688996</v>
      </c>
      <c r="AJ31" s="6">
        <v>2195.65193494132</v>
      </c>
      <c r="AK31" s="6">
        <v>2213.13504195993</v>
      </c>
      <c r="AL31" s="6">
        <v>2204.48152241222</v>
      </c>
      <c r="AM31" s="6">
        <v>3077.69234265576</v>
      </c>
      <c r="AN31" s="6">
        <v>3225.1361203292</v>
      </c>
      <c r="AO31" s="6">
        <v>3157.38335163195</v>
      </c>
      <c r="AP31" s="6">
        <v>3213.82489058435</v>
      </c>
      <c r="AQ31" s="6">
        <v>3147.02554730483</v>
      </c>
      <c r="AR31" s="6">
        <v>3203.74970770989</v>
      </c>
      <c r="AS31" s="6">
        <v>3205.63155104689</v>
      </c>
      <c r="AT31" s="6">
        <v>3250.40132925386</v>
      </c>
      <c r="AU31" s="6">
        <v>3117.4137162169</v>
      </c>
      <c r="AV31" s="6">
        <v>2189.7718305727</v>
      </c>
      <c r="AW31" s="6">
        <v>2183.01400863876</v>
      </c>
      <c r="AX31" s="6">
        <v>2219.85554070399</v>
      </c>
      <c r="AY31" s="6">
        <v>3079.32834119306</v>
      </c>
      <c r="AZ31" s="6">
        <v>3071.31407360833</v>
      </c>
      <c r="BA31" s="6">
        <v>3034.62889170154</v>
      </c>
      <c r="BB31" s="6">
        <v>3070.2669874087</v>
      </c>
      <c r="BC31" s="6">
        <v>2993.68616698182</v>
      </c>
      <c r="BD31" s="6">
        <v>3021.59522773356</v>
      </c>
      <c r="BE31" s="6">
        <v>2209.41141703284</v>
      </c>
      <c r="BF31" s="6">
        <v>2260.81802468724</v>
      </c>
      <c r="BG31" s="6">
        <v>2222.09218474015</v>
      </c>
      <c r="BH31" s="6">
        <v>2173.56246275987</v>
      </c>
      <c r="BI31" s="6">
        <v>2192.32829771682</v>
      </c>
      <c r="BJ31" s="6">
        <v>2204.12039642132</v>
      </c>
      <c r="BK31" s="6">
        <v>2979.17189902898</v>
      </c>
      <c r="BL31" s="6">
        <v>3021.87425113071</v>
      </c>
      <c r="BM31" s="6">
        <v>2948.3535332743</v>
      </c>
      <c r="BN31" s="6">
        <v>2960.71145217801</v>
      </c>
      <c r="BO31" s="6">
        <v>2889.44779278792</v>
      </c>
      <c r="BP31" s="6">
        <v>2914.12282419337</v>
      </c>
      <c r="BQ31" s="6">
        <v>2236.14917774565</v>
      </c>
      <c r="BR31" s="6">
        <v>2219.67509848133</v>
      </c>
      <c r="BS31" s="6">
        <v>2231.84065130396</v>
      </c>
      <c r="BT31" s="6">
        <v>2186.49657517174</v>
      </c>
      <c r="BU31" s="6">
        <v>2199.55171979608</v>
      </c>
      <c r="BV31" s="6">
        <v>2191.92236873955</v>
      </c>
      <c r="BW31" s="6">
        <v>3074.0492611782</v>
      </c>
      <c r="BX31" s="6">
        <v>3091.27858896136</v>
      </c>
      <c r="BY31" s="6">
        <v>3036.18868660417</v>
      </c>
      <c r="BZ31" s="6">
        <v>3031.35835870898</v>
      </c>
      <c r="CA31" s="6">
        <v>2967.16560947399</v>
      </c>
      <c r="CB31" s="6">
        <v>3054.63553610112</v>
      </c>
      <c r="CC31" s="6">
        <v>2242.93008375333</v>
      </c>
      <c r="CD31" s="6">
        <v>2217.64231742618</v>
      </c>
      <c r="CE31" s="6">
        <v>2217.1886204201</v>
      </c>
      <c r="CF31" s="6">
        <v>2188.98851340965</v>
      </c>
      <c r="CG31" s="6">
        <v>2182.81709516543</v>
      </c>
      <c r="CH31" s="6">
        <v>2171.94143597576</v>
      </c>
      <c r="CI31" s="6">
        <v>2941.33763068193</v>
      </c>
      <c r="CJ31" s="6">
        <v>3013.91396995761</v>
      </c>
      <c r="CK31" s="6">
        <v>2870.11299131979</v>
      </c>
      <c r="CL31" s="6">
        <v>2922.44370274317</v>
      </c>
      <c r="CM31" s="6">
        <v>2880.25528483689</v>
      </c>
      <c r="CN31" s="6">
        <v>2515.967195968</v>
      </c>
      <c r="CO31" s="6">
        <v>2218.76146076606</v>
      </c>
      <c r="CP31" s="6">
        <v>2206.13659413272</v>
      </c>
      <c r="CQ31" s="6">
        <v>2297.64577238386</v>
      </c>
      <c r="CR31" s="6">
        <v>2168.35389766135</v>
      </c>
      <c r="CS31" s="6">
        <v>2184.69053296014</v>
      </c>
      <c r="CT31" s="6">
        <v>2187.41893233349</v>
      </c>
    </row>
    <row r="32" spans="2:98" ht="15" customHeight="true">
      <c r="B32" s="6">
        <v>80</v>
      </c>
      <c r="C32" s="6">
        <v>3111.88045560472</v>
      </c>
      <c r="D32" s="6">
        <v>3085.36557886155</v>
      </c>
      <c r="E32" s="6">
        <v>3128.43537516192</v>
      </c>
      <c r="F32" s="6">
        <v>3089.41277423603</v>
      </c>
      <c r="G32" s="6">
        <v>3102.93441297803</v>
      </c>
      <c r="H32" s="6">
        <v>3199.94493939217</v>
      </c>
      <c r="I32" s="6">
        <v>3119.01549861259</v>
      </c>
      <c r="J32" s="6">
        <v>3125.95024407773</v>
      </c>
      <c r="K32" s="6">
        <v>3109.20345103873</v>
      </c>
      <c r="L32" s="6">
        <v>2232.95336808285</v>
      </c>
      <c r="M32" s="6">
        <v>2182.98951013606</v>
      </c>
      <c r="N32" s="6">
        <v>2193.59140390752</v>
      </c>
      <c r="O32" s="6">
        <v>3047.65689064881</v>
      </c>
      <c r="P32" s="6">
        <v>3189.2459415094</v>
      </c>
      <c r="Q32" s="6">
        <v>3108.31695881646</v>
      </c>
      <c r="R32" s="6">
        <v>3099.50726215499</v>
      </c>
      <c r="S32" s="6">
        <v>3072.08662981233</v>
      </c>
      <c r="T32" s="6">
        <v>3124.20557990698</v>
      </c>
      <c r="U32" s="6">
        <v>3104.28165634881</v>
      </c>
      <c r="V32" s="6">
        <v>3083.00569119474</v>
      </c>
      <c r="W32" s="6">
        <v>3081.58399208476</v>
      </c>
      <c r="X32" s="6">
        <v>2196.83829298608</v>
      </c>
      <c r="Y32" s="6">
        <v>2193.90651604119</v>
      </c>
      <c r="Z32" s="6">
        <v>2173.91199728203</v>
      </c>
      <c r="AA32" s="6">
        <v>3186.84909725223</v>
      </c>
      <c r="AB32" s="6">
        <v>3265.73532658811</v>
      </c>
      <c r="AC32" s="6">
        <v>3248.42049486925</v>
      </c>
      <c r="AD32" s="6">
        <v>3200.23862681766</v>
      </c>
      <c r="AE32" s="6">
        <v>3224.943353256</v>
      </c>
      <c r="AF32" s="6">
        <v>3314.9889531747</v>
      </c>
      <c r="AG32" s="6">
        <v>3273.49411043325</v>
      </c>
      <c r="AH32" s="6">
        <v>3202.17987745769</v>
      </c>
      <c r="AI32" s="6">
        <v>3111.95073079694</v>
      </c>
      <c r="AJ32" s="6">
        <v>2195.33817067876</v>
      </c>
      <c r="AK32" s="6">
        <v>2212.69358684228</v>
      </c>
      <c r="AL32" s="6">
        <v>2204.09489795758</v>
      </c>
      <c r="AM32" s="6">
        <v>3049.72346469869</v>
      </c>
      <c r="AN32" s="6">
        <v>3192.14221519906</v>
      </c>
      <c r="AO32" s="6">
        <v>3123.71512152639</v>
      </c>
      <c r="AP32" s="6">
        <v>3177.27729546933</v>
      </c>
      <c r="AQ32" s="6">
        <v>3111.26603339701</v>
      </c>
      <c r="AR32" s="6">
        <v>3169.48049610916</v>
      </c>
      <c r="AS32" s="6">
        <v>3169.43283107927</v>
      </c>
      <c r="AT32" s="6">
        <v>3214.13746913254</v>
      </c>
      <c r="AU32" s="6">
        <v>3081.1646979531</v>
      </c>
      <c r="AV32" s="6">
        <v>2189.19119242777</v>
      </c>
      <c r="AW32" s="6">
        <v>2182.87025671763</v>
      </c>
      <c r="AX32" s="6">
        <v>2218.98462196786</v>
      </c>
      <c r="AY32" s="6">
        <v>3044.2436666647</v>
      </c>
      <c r="AZ32" s="6">
        <v>3036.66616529813</v>
      </c>
      <c r="BA32" s="6">
        <v>3000.14812062769</v>
      </c>
      <c r="BB32" s="6">
        <v>3035.88110822133</v>
      </c>
      <c r="BC32" s="6">
        <v>2961.24948701843</v>
      </c>
      <c r="BD32" s="6">
        <v>2989.48658220861</v>
      </c>
      <c r="BE32" s="6">
        <v>2207.17776247713</v>
      </c>
      <c r="BF32" s="6">
        <v>2258.23143449285</v>
      </c>
      <c r="BG32" s="6">
        <v>2220.38752457615</v>
      </c>
      <c r="BH32" s="6">
        <v>2173.0068693847</v>
      </c>
      <c r="BI32" s="6">
        <v>2192.17504663955</v>
      </c>
      <c r="BJ32" s="6">
        <v>2203.51907731381</v>
      </c>
      <c r="BK32" s="6">
        <v>2948.51353177389</v>
      </c>
      <c r="BL32" s="6">
        <v>2991.62836255873</v>
      </c>
      <c r="BM32" s="6">
        <v>2919.78522845616</v>
      </c>
      <c r="BN32" s="6">
        <v>2930.93803443179</v>
      </c>
      <c r="BO32" s="6">
        <v>2861.66386474282</v>
      </c>
      <c r="BP32" s="6">
        <v>2885.74242088456</v>
      </c>
      <c r="BQ32" s="6">
        <v>2234.76793658954</v>
      </c>
      <c r="BR32" s="6">
        <v>2218.52907399134</v>
      </c>
      <c r="BS32" s="6">
        <v>2229.73891197125</v>
      </c>
      <c r="BT32" s="6">
        <v>2186.29291670385</v>
      </c>
      <c r="BU32" s="6">
        <v>2199.26708630199</v>
      </c>
      <c r="BV32" s="6">
        <v>2191.08911534306</v>
      </c>
      <c r="BW32" s="6">
        <v>3041.10546117422</v>
      </c>
      <c r="BX32" s="6">
        <v>3057.47822486719</v>
      </c>
      <c r="BY32" s="6">
        <v>3002.68333487838</v>
      </c>
      <c r="BZ32" s="6">
        <v>2998.2730622926</v>
      </c>
      <c r="CA32" s="6">
        <v>2934.90124751127</v>
      </c>
      <c r="CB32" s="6">
        <v>3024.98756305064</v>
      </c>
      <c r="CC32" s="6">
        <v>2241.79313115303</v>
      </c>
      <c r="CD32" s="6">
        <v>2216.09567692889</v>
      </c>
      <c r="CE32" s="6">
        <v>2214.97011720447</v>
      </c>
      <c r="CF32" s="6">
        <v>2188.5971008121</v>
      </c>
      <c r="CG32" s="6">
        <v>2182.17561863981</v>
      </c>
      <c r="CH32" s="6">
        <v>2171.25346344009</v>
      </c>
      <c r="CI32" s="6">
        <v>2912.54817527472</v>
      </c>
      <c r="CJ32" s="6">
        <v>2983.69954070802</v>
      </c>
      <c r="CK32" s="6">
        <v>2841.51094578071</v>
      </c>
      <c r="CL32" s="6">
        <v>2892.94967239761</v>
      </c>
      <c r="CM32" s="6">
        <v>2851.10997519162</v>
      </c>
      <c r="CN32" s="6">
        <v>2495.09744741758</v>
      </c>
      <c r="CO32" s="6">
        <v>2217.24191530768</v>
      </c>
      <c r="CP32" s="6">
        <v>2204.1660450262</v>
      </c>
      <c r="CQ32" s="6">
        <v>2293.54425579014</v>
      </c>
      <c r="CR32" s="6">
        <v>2168.12339680967</v>
      </c>
      <c r="CS32" s="6">
        <v>2184.64252333835</v>
      </c>
      <c r="CT32" s="6">
        <v>2187.20313555838</v>
      </c>
    </row>
    <row r="33" spans="2:98" ht="15" customHeight="true">
      <c r="B33" s="6">
        <v>80.5</v>
      </c>
      <c r="C33" s="6">
        <v>3075.56715671158</v>
      </c>
      <c r="D33" s="6">
        <v>3051.47482858968</v>
      </c>
      <c r="E33" s="6">
        <v>3083.68271133407</v>
      </c>
      <c r="F33" s="6">
        <v>3047.2910281906</v>
      </c>
      <c r="G33" s="6">
        <v>3061.78661201478</v>
      </c>
      <c r="H33" s="6">
        <v>3157.46483541542</v>
      </c>
      <c r="I33" s="6">
        <v>3078.61822301066</v>
      </c>
      <c r="J33" s="6">
        <v>3081.24339637694</v>
      </c>
      <c r="K33" s="6">
        <v>3064.58668067143</v>
      </c>
      <c r="L33" s="6">
        <v>2232.50163887884</v>
      </c>
      <c r="M33" s="6">
        <v>2182.32003039688</v>
      </c>
      <c r="N33" s="6">
        <v>2193.29613523681</v>
      </c>
      <c r="O33" s="6">
        <v>3015.50684359798</v>
      </c>
      <c r="P33" s="6">
        <v>3151.38532950555</v>
      </c>
      <c r="Q33" s="6">
        <v>3066.99713849416</v>
      </c>
      <c r="R33" s="6">
        <v>3058.21200891873</v>
      </c>
      <c r="S33" s="6">
        <v>3029.09650471908</v>
      </c>
      <c r="T33" s="6">
        <v>3085.14297751787</v>
      </c>
      <c r="U33" s="6">
        <v>3061.88099254981</v>
      </c>
      <c r="V33" s="6">
        <v>3039.64577201518</v>
      </c>
      <c r="W33" s="6">
        <v>3033.64380416494</v>
      </c>
      <c r="X33" s="6">
        <v>2196.40657400591</v>
      </c>
      <c r="Y33" s="6">
        <v>2193.50899848354</v>
      </c>
      <c r="Z33" s="6">
        <v>2173.66922237957</v>
      </c>
      <c r="AA33" s="6">
        <v>3149.90223667788</v>
      </c>
      <c r="AB33" s="6">
        <v>3225.33906907132</v>
      </c>
      <c r="AC33" s="6">
        <v>3199.54784847379</v>
      </c>
      <c r="AD33" s="6">
        <v>3152.14172674992</v>
      </c>
      <c r="AE33" s="6">
        <v>3174.79102280532</v>
      </c>
      <c r="AF33" s="6">
        <v>3269.87042340012</v>
      </c>
      <c r="AG33" s="6">
        <v>3222.34573628714</v>
      </c>
      <c r="AH33" s="6">
        <v>3150.98813051004</v>
      </c>
      <c r="AI33" s="6">
        <v>3063.5480206833</v>
      </c>
      <c r="AJ33" s="6">
        <v>2195.19880057996</v>
      </c>
      <c r="AK33" s="6">
        <v>2212.19023150201</v>
      </c>
      <c r="AL33" s="6">
        <v>2203.84857309211</v>
      </c>
      <c r="AM33" s="6">
        <v>3017.89881488902</v>
      </c>
      <c r="AN33" s="6">
        <v>3153.37163861658</v>
      </c>
      <c r="AO33" s="6">
        <v>3081.43150703474</v>
      </c>
      <c r="AP33" s="6">
        <v>3130.9743870694</v>
      </c>
      <c r="AQ33" s="6">
        <v>3065.98017611833</v>
      </c>
      <c r="AR33" s="6">
        <v>3126.08841525291</v>
      </c>
      <c r="AS33" s="6">
        <v>3123.94707845645</v>
      </c>
      <c r="AT33" s="6">
        <v>3169.79759308369</v>
      </c>
      <c r="AU33" s="6">
        <v>3033.61414553146</v>
      </c>
      <c r="AV33" s="6">
        <v>2188.95578962821</v>
      </c>
      <c r="AW33" s="6">
        <v>2182.62852177774</v>
      </c>
      <c r="AX33" s="6">
        <v>2218.3808098901</v>
      </c>
      <c r="AY33" s="6">
        <v>3007.6264587294</v>
      </c>
      <c r="AZ33" s="6">
        <v>3000.34579284392</v>
      </c>
      <c r="BA33" s="6">
        <v>2963.79331386292</v>
      </c>
      <c r="BB33" s="6">
        <v>2999.56036623701</v>
      </c>
      <c r="BC33" s="6">
        <v>2926.76511913923</v>
      </c>
      <c r="BD33" s="6">
        <v>2955.05579076001</v>
      </c>
      <c r="BE33" s="6">
        <v>2205.59171242167</v>
      </c>
      <c r="BF33" s="6">
        <v>2255.55481397277</v>
      </c>
      <c r="BG33" s="6">
        <v>2218.74048506963</v>
      </c>
      <c r="BH33" s="6">
        <v>2172.75045201656</v>
      </c>
      <c r="BI33" s="6">
        <v>2191.89918937753</v>
      </c>
      <c r="BJ33" s="6">
        <v>2203.05022892851</v>
      </c>
      <c r="BK33" s="6">
        <v>2915.67421976794</v>
      </c>
      <c r="BL33" s="6">
        <v>2959.76255867223</v>
      </c>
      <c r="BM33" s="6">
        <v>2889.22240765608</v>
      </c>
      <c r="BN33" s="6">
        <v>2899.88355327188</v>
      </c>
      <c r="BO33" s="6">
        <v>2832.67375024604</v>
      </c>
      <c r="BP33" s="6">
        <v>2856.15271849938</v>
      </c>
      <c r="BQ33" s="6">
        <v>2233.54078324932</v>
      </c>
      <c r="BR33" s="6">
        <v>2217.34898712816</v>
      </c>
      <c r="BS33" s="6">
        <v>2227.97607281927</v>
      </c>
      <c r="BT33" s="6">
        <v>2186.36671103509</v>
      </c>
      <c r="BU33" s="6">
        <v>2198.86499603308</v>
      </c>
      <c r="BV33" s="6">
        <v>2190.15991104032</v>
      </c>
      <c r="BW33" s="6">
        <v>3006.36393011209</v>
      </c>
      <c r="BX33" s="6">
        <v>3022.09809844126</v>
      </c>
      <c r="BY33" s="6">
        <v>2967.22526680213</v>
      </c>
      <c r="BZ33" s="6">
        <v>2963.29473037569</v>
      </c>
      <c r="CA33" s="6">
        <v>2900.69865141347</v>
      </c>
      <c r="CB33" s="6">
        <v>2993.90924773417</v>
      </c>
      <c r="CC33" s="6">
        <v>2240.743624935</v>
      </c>
      <c r="CD33" s="6">
        <v>2214.39451918007</v>
      </c>
      <c r="CE33" s="6">
        <v>2213.47376056148</v>
      </c>
      <c r="CF33" s="6">
        <v>2188.3521863721</v>
      </c>
      <c r="CG33" s="6">
        <v>2181.32086661218</v>
      </c>
      <c r="CH33" s="6">
        <v>2170.49890155433</v>
      </c>
      <c r="CI33" s="6">
        <v>2882.29118502593</v>
      </c>
      <c r="CJ33" s="6">
        <v>2951.95534591351</v>
      </c>
      <c r="CK33" s="6">
        <v>2811.68183083537</v>
      </c>
      <c r="CL33" s="6">
        <v>2862.17771926277</v>
      </c>
      <c r="CM33" s="6">
        <v>2820.20851445589</v>
      </c>
      <c r="CN33" s="6">
        <v>2472.48840594771</v>
      </c>
      <c r="CO33" s="6">
        <v>2215.89994625274</v>
      </c>
      <c r="CP33" s="6">
        <v>2202.82269298112</v>
      </c>
      <c r="CQ33" s="6">
        <v>2289.41099227976</v>
      </c>
      <c r="CR33" s="6">
        <v>2168.14009724643</v>
      </c>
      <c r="CS33" s="6">
        <v>2184.51740293045</v>
      </c>
      <c r="CT33" s="6">
        <v>2186.79087298887</v>
      </c>
    </row>
    <row r="34" spans="2:98" ht="15" customHeight="true">
      <c r="B34" s="6">
        <v>81</v>
      </c>
      <c r="C34" s="6">
        <v>3033.26267332474</v>
      </c>
      <c r="D34" s="6">
        <v>3010.92317237571</v>
      </c>
      <c r="E34" s="6">
        <v>3025.31164950749</v>
      </c>
      <c r="F34" s="6">
        <v>2991.09196699281</v>
      </c>
      <c r="G34" s="6">
        <v>3007.50100124194</v>
      </c>
      <c r="H34" s="6">
        <v>3102.05142451937</v>
      </c>
      <c r="I34" s="6">
        <v>3025.42367476444</v>
      </c>
      <c r="J34" s="6">
        <v>3018.95724061936</v>
      </c>
      <c r="K34" s="6">
        <v>3003.35253731007</v>
      </c>
      <c r="L34" s="6">
        <v>2232.10359983975</v>
      </c>
      <c r="M34" s="6">
        <v>2181.91226402766</v>
      </c>
      <c r="N34" s="6">
        <v>2192.75636781621</v>
      </c>
      <c r="O34" s="6">
        <v>2977.73851265203</v>
      </c>
      <c r="P34" s="6">
        <v>3106.99570439042</v>
      </c>
      <c r="Q34" s="6">
        <v>3013.0788265459</v>
      </c>
      <c r="R34" s="6">
        <v>3003.68720737929</v>
      </c>
      <c r="S34" s="6">
        <v>2969.87013826732</v>
      </c>
      <c r="T34" s="6">
        <v>3033.25242750113</v>
      </c>
      <c r="U34" s="6">
        <v>3004.32392226475</v>
      </c>
      <c r="V34" s="6">
        <v>2978.77006069236</v>
      </c>
      <c r="W34" s="6">
        <v>2966.61284121691</v>
      </c>
      <c r="X34" s="6">
        <v>2195.53814525589</v>
      </c>
      <c r="Y34" s="6">
        <v>2193.09178239335</v>
      </c>
      <c r="Z34" s="6">
        <v>2173.14324972552</v>
      </c>
      <c r="AA34" s="6">
        <v>3106.61637826818</v>
      </c>
      <c r="AB34" s="6">
        <v>3177.9860273021</v>
      </c>
      <c r="AC34" s="6">
        <v>3136.73822877144</v>
      </c>
      <c r="AD34" s="6">
        <v>3087.92047187998</v>
      </c>
      <c r="AE34" s="6">
        <v>3107.84795311545</v>
      </c>
      <c r="AF34" s="6">
        <v>3211.71632551705</v>
      </c>
      <c r="AG34" s="6">
        <v>3153.9493322335</v>
      </c>
      <c r="AH34" s="6">
        <v>3080.20739007671</v>
      </c>
      <c r="AI34" s="6">
        <v>2996.99947240516</v>
      </c>
      <c r="AJ34" s="6">
        <v>2194.88573219449</v>
      </c>
      <c r="AK34" s="6">
        <v>2211.40941586087</v>
      </c>
      <c r="AL34" s="6">
        <v>2203.464143272</v>
      </c>
      <c r="AM34" s="6">
        <v>2981.30620059045</v>
      </c>
      <c r="AN34" s="6">
        <v>3107.56617416879</v>
      </c>
      <c r="AO34" s="6">
        <v>3027.34618004584</v>
      </c>
      <c r="AP34" s="6">
        <v>3068.97643826482</v>
      </c>
      <c r="AQ34" s="6">
        <v>3004.91651875194</v>
      </c>
      <c r="AR34" s="6">
        <v>3067.4704499943</v>
      </c>
      <c r="AS34" s="6">
        <v>3063.26166499164</v>
      </c>
      <c r="AT34" s="6">
        <v>3112.09950021935</v>
      </c>
      <c r="AU34" s="6">
        <v>2967.3431373833</v>
      </c>
      <c r="AV34" s="6">
        <v>2188.63619034436</v>
      </c>
      <c r="AW34" s="6">
        <v>2182.08469719734</v>
      </c>
      <c r="AX34" s="6">
        <v>2217.70020803279</v>
      </c>
      <c r="AY34" s="6">
        <v>2968.63216383701</v>
      </c>
      <c r="AZ34" s="6">
        <v>2962.23094807372</v>
      </c>
      <c r="BA34" s="6">
        <v>2924.9222288467</v>
      </c>
      <c r="BB34" s="6">
        <v>2960.62310789846</v>
      </c>
      <c r="BC34" s="6">
        <v>2889.83909141343</v>
      </c>
      <c r="BD34" s="6">
        <v>2917.73178217463</v>
      </c>
      <c r="BE34" s="6">
        <v>2204.40827343542</v>
      </c>
      <c r="BF34" s="6">
        <v>2253.1740384488</v>
      </c>
      <c r="BG34" s="6">
        <v>2217.40438703402</v>
      </c>
      <c r="BH34" s="6">
        <v>2172.43297486519</v>
      </c>
      <c r="BI34" s="6">
        <v>2191.71419142003</v>
      </c>
      <c r="BJ34" s="6">
        <v>2202.64282593342</v>
      </c>
      <c r="BK34" s="6">
        <v>2880.64926733552</v>
      </c>
      <c r="BL34" s="6">
        <v>2925.370950682</v>
      </c>
      <c r="BM34" s="6">
        <v>2856.45479696696</v>
      </c>
      <c r="BN34" s="6">
        <v>2866.98527277885</v>
      </c>
      <c r="BO34" s="6">
        <v>2801.91100895255</v>
      </c>
      <c r="BP34" s="6">
        <v>2824.53636729226</v>
      </c>
      <c r="BQ34" s="6">
        <v>2232.60419633074</v>
      </c>
      <c r="BR34" s="6">
        <v>2216.11987171354</v>
      </c>
      <c r="BS34" s="6">
        <v>2225.97731300449</v>
      </c>
      <c r="BT34" s="6">
        <v>2186.12641815743</v>
      </c>
      <c r="BU34" s="6">
        <v>2198.32795579487</v>
      </c>
      <c r="BV34" s="6">
        <v>2189.61809164834</v>
      </c>
      <c r="BW34" s="6">
        <v>2969.29600543693</v>
      </c>
      <c r="BX34" s="6">
        <v>2984.1580452515</v>
      </c>
      <c r="BY34" s="6">
        <v>2929.48173906014</v>
      </c>
      <c r="BZ34" s="6">
        <v>2925.77209962022</v>
      </c>
      <c r="CA34" s="6">
        <v>2864.59806669229</v>
      </c>
      <c r="CB34" s="6">
        <v>2960.86502292017</v>
      </c>
      <c r="CC34" s="6">
        <v>2239.3146434963</v>
      </c>
      <c r="CD34" s="6">
        <v>2212.61666037207</v>
      </c>
      <c r="CE34" s="6">
        <v>2212.12712492796</v>
      </c>
      <c r="CF34" s="6">
        <v>2188.08505223687</v>
      </c>
      <c r="CG34" s="6">
        <v>2180.69109126104</v>
      </c>
      <c r="CH34" s="6">
        <v>2169.6628258617</v>
      </c>
      <c r="CI34" s="6">
        <v>2849.96974299853</v>
      </c>
      <c r="CJ34" s="6">
        <v>2917.49573484612</v>
      </c>
      <c r="CK34" s="6">
        <v>2780.17004475091</v>
      </c>
      <c r="CL34" s="6">
        <v>2829.80384923326</v>
      </c>
      <c r="CM34" s="6">
        <v>2787.10487346304</v>
      </c>
      <c r="CN34" s="6">
        <v>2447.1272106211</v>
      </c>
      <c r="CO34" s="6">
        <v>2214.9616676722</v>
      </c>
      <c r="CP34" s="6">
        <v>2201.55613067843</v>
      </c>
      <c r="CQ34" s="6">
        <v>2284.83356477768</v>
      </c>
      <c r="CR34" s="6">
        <v>2167.89251761254</v>
      </c>
      <c r="CS34" s="6">
        <v>2184.33010770338</v>
      </c>
      <c r="CT34" s="6">
        <v>2186.38826617565</v>
      </c>
    </row>
    <row r="35" spans="2:98" ht="15" customHeight="true">
      <c r="B35" s="6">
        <v>81.5</v>
      </c>
      <c r="C35" s="6">
        <v>2985.07149196336</v>
      </c>
      <c r="D35" s="6">
        <v>2963.96126003487</v>
      </c>
      <c r="E35" s="6">
        <v>2952.55848278057</v>
      </c>
      <c r="F35" s="6">
        <v>2918.91961509456</v>
      </c>
      <c r="G35" s="6">
        <v>2937.31344458741</v>
      </c>
      <c r="H35" s="6">
        <v>3031.01006486165</v>
      </c>
      <c r="I35" s="6">
        <v>2956.4239691584</v>
      </c>
      <c r="J35" s="6">
        <v>2934.04528669171</v>
      </c>
      <c r="K35" s="6">
        <v>2923.07813043286</v>
      </c>
      <c r="L35" s="6">
        <v>2231.25456802578</v>
      </c>
      <c r="M35" s="6">
        <v>2181.30279039724</v>
      </c>
      <c r="N35" s="6">
        <v>2192.53498584302</v>
      </c>
      <c r="O35" s="6">
        <v>2934.33588498181</v>
      </c>
      <c r="P35" s="6">
        <v>3056.03336290698</v>
      </c>
      <c r="Q35" s="6">
        <v>2945.98788926294</v>
      </c>
      <c r="R35" s="6">
        <v>2934.55278579246</v>
      </c>
      <c r="S35" s="6">
        <v>2892.58026120809</v>
      </c>
      <c r="T35" s="6">
        <v>2966.04618971608</v>
      </c>
      <c r="U35" s="6">
        <v>2929.96527022853</v>
      </c>
      <c r="V35" s="6">
        <v>2896.7047005009</v>
      </c>
      <c r="W35" s="6">
        <v>2877.10799774526</v>
      </c>
      <c r="X35" s="6">
        <v>2194.8247587951</v>
      </c>
      <c r="Y35" s="6">
        <v>2192.69543405148</v>
      </c>
      <c r="Z35" s="6">
        <v>2172.6145454032</v>
      </c>
      <c r="AA35" s="6">
        <v>3057.10660084136</v>
      </c>
      <c r="AB35" s="6">
        <v>3123.65937617862</v>
      </c>
      <c r="AC35" s="6">
        <v>3059.00807008016</v>
      </c>
      <c r="AD35" s="6">
        <v>3006.72688223695</v>
      </c>
      <c r="AE35" s="6">
        <v>3021.52050703294</v>
      </c>
      <c r="AF35" s="6">
        <v>3140.17958291901</v>
      </c>
      <c r="AG35" s="6">
        <v>3066.61012192879</v>
      </c>
      <c r="AH35" s="6">
        <v>2985.57277417337</v>
      </c>
      <c r="AI35" s="6">
        <v>2909.31736825468</v>
      </c>
      <c r="AJ35" s="6">
        <v>2194.55998662639</v>
      </c>
      <c r="AK35" s="6">
        <v>2210.79506868756</v>
      </c>
      <c r="AL35" s="6">
        <v>2203.46778230696</v>
      </c>
      <c r="AM35" s="6">
        <v>2940.03425519403</v>
      </c>
      <c r="AN35" s="6">
        <v>3054.33756664461</v>
      </c>
      <c r="AO35" s="6">
        <v>2960.3967311316</v>
      </c>
      <c r="AP35" s="6">
        <v>2990.54471170855</v>
      </c>
      <c r="AQ35" s="6">
        <v>2926.86869246996</v>
      </c>
      <c r="AR35" s="6">
        <v>2991.62194857117</v>
      </c>
      <c r="AS35" s="6">
        <v>2985.8490915172</v>
      </c>
      <c r="AT35" s="6">
        <v>3040.42585894321</v>
      </c>
      <c r="AU35" s="6">
        <v>2878.75747785149</v>
      </c>
      <c r="AV35" s="6">
        <v>2188.65323944519</v>
      </c>
      <c r="AW35" s="6">
        <v>2181.99911240921</v>
      </c>
      <c r="AX35" s="6">
        <v>2217.16251819944</v>
      </c>
      <c r="AY35" s="6">
        <v>2927.14384127122</v>
      </c>
      <c r="AZ35" s="6">
        <v>2921.4580343204</v>
      </c>
      <c r="BA35" s="6">
        <v>2883.31146969143</v>
      </c>
      <c r="BB35" s="6">
        <v>2919.25618227727</v>
      </c>
      <c r="BC35" s="6">
        <v>2850.20717430727</v>
      </c>
      <c r="BD35" s="6">
        <v>2877.15806683044</v>
      </c>
      <c r="BE35" s="6">
        <v>2203.96288316953</v>
      </c>
      <c r="BF35" s="6">
        <v>2251.22658572506</v>
      </c>
      <c r="BG35" s="6">
        <v>2215.98920599045</v>
      </c>
      <c r="BH35" s="6">
        <v>2172.27051559679</v>
      </c>
      <c r="BI35" s="6">
        <v>2191.64113252339</v>
      </c>
      <c r="BJ35" s="6">
        <v>2202.4401401115</v>
      </c>
      <c r="BK35" s="6">
        <v>2843.09891288688</v>
      </c>
      <c r="BL35" s="6">
        <v>2888.67808792352</v>
      </c>
      <c r="BM35" s="6">
        <v>2821.07453887344</v>
      </c>
      <c r="BN35" s="6">
        <v>2831.68605370556</v>
      </c>
      <c r="BO35" s="6">
        <v>2768.83045943765</v>
      </c>
      <c r="BP35" s="6">
        <v>2790.25442790925</v>
      </c>
      <c r="BQ35" s="6">
        <v>2232.05827936818</v>
      </c>
      <c r="BR35" s="6">
        <v>2214.72585600926</v>
      </c>
      <c r="BS35" s="6">
        <v>2224.18810687081</v>
      </c>
      <c r="BT35" s="6">
        <v>2185.95623221184</v>
      </c>
      <c r="BU35" s="6">
        <v>2197.7683111297</v>
      </c>
      <c r="BV35" s="6">
        <v>2189.05569658058</v>
      </c>
      <c r="BW35" s="6">
        <v>2929.22143677894</v>
      </c>
      <c r="BX35" s="6">
        <v>2943.34517683674</v>
      </c>
      <c r="BY35" s="6">
        <v>2888.87589939478</v>
      </c>
      <c r="BZ35" s="6">
        <v>2885.28692266391</v>
      </c>
      <c r="CA35" s="6">
        <v>2826.28451341751</v>
      </c>
      <c r="CB35" s="6">
        <v>2925.58692176332</v>
      </c>
      <c r="CC35" s="6">
        <v>2238.29628501888</v>
      </c>
      <c r="CD35" s="6">
        <v>2211.29355446076</v>
      </c>
      <c r="CE35" s="6">
        <v>2210.71400056936</v>
      </c>
      <c r="CF35" s="6">
        <v>2187.88797222771</v>
      </c>
      <c r="CG35" s="6">
        <v>2180.52533760315</v>
      </c>
      <c r="CH35" s="6">
        <v>2169.10959941048</v>
      </c>
      <c r="CI35" s="6">
        <v>2815.07129423481</v>
      </c>
      <c r="CJ35" s="6">
        <v>2880.04181439756</v>
      </c>
      <c r="CK35" s="6">
        <v>2746.48923096988</v>
      </c>
      <c r="CL35" s="6">
        <v>2795.24735178472</v>
      </c>
      <c r="CM35" s="6">
        <v>2751.89573032891</v>
      </c>
      <c r="CN35" s="6">
        <v>2417.46078659976</v>
      </c>
      <c r="CO35" s="6">
        <v>2214.16788812132</v>
      </c>
      <c r="CP35" s="6">
        <v>2200.44468028329</v>
      </c>
      <c r="CQ35" s="6">
        <v>2278.74922980809</v>
      </c>
      <c r="CR35" s="6">
        <v>2167.88949201411</v>
      </c>
      <c r="CS35" s="6">
        <v>2184.25169146721</v>
      </c>
      <c r="CT35" s="6">
        <v>2186.18609475461</v>
      </c>
    </row>
    <row r="36" spans="2:98" ht="15" customHeight="true">
      <c r="B36" s="6">
        <v>82</v>
      </c>
      <c r="C36" s="6">
        <v>2931.54714587147</v>
      </c>
      <c r="D36" s="6">
        <v>2911.19673044349</v>
      </c>
      <c r="E36" s="6">
        <v>2867.20838626084</v>
      </c>
      <c r="F36" s="6">
        <v>2832.3680655886</v>
      </c>
      <c r="G36" s="6">
        <v>2852.34819387203</v>
      </c>
      <c r="H36" s="6">
        <v>2944.94666426308</v>
      </c>
      <c r="I36" s="6">
        <v>2872.82040137293</v>
      </c>
      <c r="J36" s="6">
        <v>2826.86195830223</v>
      </c>
      <c r="K36" s="6">
        <v>2825.2007035957</v>
      </c>
      <c r="L36" s="6">
        <v>2230.16300178927</v>
      </c>
      <c r="M36" s="6">
        <v>2181.10665022321</v>
      </c>
      <c r="N36" s="6">
        <v>2192.299425262</v>
      </c>
      <c r="O36" s="6">
        <v>2886.51263271723</v>
      </c>
      <c r="P36" s="6">
        <v>2999.41658293355</v>
      </c>
      <c r="Q36" s="6">
        <v>2867.09877288472</v>
      </c>
      <c r="R36" s="6">
        <v>2853.17267023545</v>
      </c>
      <c r="S36" s="6">
        <v>2797.64991801052</v>
      </c>
      <c r="T36" s="6">
        <v>2884.60929348967</v>
      </c>
      <c r="U36" s="6">
        <v>2840.35155453936</v>
      </c>
      <c r="V36" s="6">
        <v>2794.5422292316</v>
      </c>
      <c r="W36" s="6">
        <v>2766.86269621207</v>
      </c>
      <c r="X36" s="6">
        <v>2193.55620462577</v>
      </c>
      <c r="Y36" s="6">
        <v>2191.97119511523</v>
      </c>
      <c r="Z36" s="6">
        <v>2171.8454779431</v>
      </c>
      <c r="AA36" s="6">
        <v>3002.10822816412</v>
      </c>
      <c r="AB36" s="6">
        <v>3063.06579425339</v>
      </c>
      <c r="AC36" s="6">
        <v>2968.96679967864</v>
      </c>
      <c r="AD36" s="6">
        <v>2910.45671184743</v>
      </c>
      <c r="AE36" s="6">
        <v>2917.65491883217</v>
      </c>
      <c r="AF36" s="6">
        <v>3055.89653355708</v>
      </c>
      <c r="AG36" s="6">
        <v>2962.35811609313</v>
      </c>
      <c r="AH36" s="6">
        <v>2868.85555241346</v>
      </c>
      <c r="AI36" s="6">
        <v>2802.06106331317</v>
      </c>
      <c r="AJ36" s="6">
        <v>2194.32639430152</v>
      </c>
      <c r="AK36" s="6">
        <v>2210.2948538237</v>
      </c>
      <c r="AL36" s="6">
        <v>2203.37089628326</v>
      </c>
      <c r="AM36" s="6">
        <v>2894.46669243887</v>
      </c>
      <c r="AN36" s="6">
        <v>2995.0701826219</v>
      </c>
      <c r="AO36" s="6">
        <v>2882.45820471499</v>
      </c>
      <c r="AP36" s="6">
        <v>2897.72581156949</v>
      </c>
      <c r="AQ36" s="6">
        <v>2833.75552648204</v>
      </c>
      <c r="AR36" s="6">
        <v>2900.36601910173</v>
      </c>
      <c r="AS36" s="6">
        <v>2894.29349307591</v>
      </c>
      <c r="AT36" s="6">
        <v>2956.75339474915</v>
      </c>
      <c r="AU36" s="6">
        <v>2769.26644504352</v>
      </c>
      <c r="AV36" s="6">
        <v>2188.7290450678</v>
      </c>
      <c r="AW36" s="6">
        <v>2181.6045533527</v>
      </c>
      <c r="AX36" s="6">
        <v>2216.77931892208</v>
      </c>
      <c r="AY36" s="6">
        <v>2881.32786962596</v>
      </c>
      <c r="AZ36" s="6">
        <v>2876.65126129672</v>
      </c>
      <c r="BA36" s="6">
        <v>2837.58937311054</v>
      </c>
      <c r="BB36" s="6">
        <v>2874.20580887671</v>
      </c>
      <c r="BC36" s="6">
        <v>2806.69839689396</v>
      </c>
      <c r="BD36" s="6">
        <v>2832.54351083704</v>
      </c>
      <c r="BE36" s="6">
        <v>2203.78158132162</v>
      </c>
      <c r="BF36" s="6">
        <v>2249.24943847048</v>
      </c>
      <c r="BG36" s="6">
        <v>2214.84769775069</v>
      </c>
      <c r="BH36" s="6">
        <v>2172.02263567188</v>
      </c>
      <c r="BI36" s="6">
        <v>2191.25900764748</v>
      </c>
      <c r="BJ36" s="6">
        <v>2202.09654571491</v>
      </c>
      <c r="BK36" s="6">
        <v>2801.96166381397</v>
      </c>
      <c r="BL36" s="6">
        <v>2848.0870469978</v>
      </c>
      <c r="BM36" s="6">
        <v>2782.13279011178</v>
      </c>
      <c r="BN36" s="6">
        <v>2792.98249854783</v>
      </c>
      <c r="BO36" s="6">
        <v>2732.18459004911</v>
      </c>
      <c r="BP36" s="6">
        <v>2752.45430633106</v>
      </c>
      <c r="BQ36" s="6">
        <v>2231.42910178118</v>
      </c>
      <c r="BR36" s="6">
        <v>2213.43770138567</v>
      </c>
      <c r="BS36" s="6">
        <v>2222.85054024728</v>
      </c>
      <c r="BT36" s="6">
        <v>2185.8761732181</v>
      </c>
      <c r="BU36" s="6">
        <v>2197.23330867755</v>
      </c>
      <c r="BV36" s="6">
        <v>2189.14071038977</v>
      </c>
      <c r="BW36" s="6">
        <v>2884.68029375641</v>
      </c>
      <c r="BX36" s="6">
        <v>2898.17481827905</v>
      </c>
      <c r="BY36" s="6">
        <v>2844.37700548635</v>
      </c>
      <c r="BZ36" s="6">
        <v>2840.70862171692</v>
      </c>
      <c r="CA36" s="6">
        <v>2784.49882958282</v>
      </c>
      <c r="CB36" s="6">
        <v>2886.80059568775</v>
      </c>
      <c r="CC36" s="6">
        <v>2237.18846027296</v>
      </c>
      <c r="CD36" s="6">
        <v>2209.65256401573</v>
      </c>
      <c r="CE36" s="6">
        <v>2209.2512493541</v>
      </c>
      <c r="CF36" s="6">
        <v>2187.72915153057</v>
      </c>
      <c r="CG36" s="6">
        <v>2180.44027887247</v>
      </c>
      <c r="CH36" s="6">
        <v>2168.6187893307</v>
      </c>
      <c r="CI36" s="6">
        <v>2776.70029161617</v>
      </c>
      <c r="CJ36" s="6">
        <v>2838.43723974069</v>
      </c>
      <c r="CK36" s="6">
        <v>2710.14449764418</v>
      </c>
      <c r="CL36" s="6">
        <v>2757.87778362277</v>
      </c>
      <c r="CM36" s="6">
        <v>2713.83067032262</v>
      </c>
      <c r="CN36" s="6">
        <v>2384.07314133543</v>
      </c>
      <c r="CO36" s="6">
        <v>2213.3715456019</v>
      </c>
      <c r="CP36" s="6">
        <v>2199.59625480631</v>
      </c>
      <c r="CQ36" s="6">
        <v>2271.19329912847</v>
      </c>
      <c r="CR36" s="6">
        <v>2167.62672059887</v>
      </c>
      <c r="CS36" s="6">
        <v>2184.03076703697</v>
      </c>
      <c r="CT36" s="6">
        <v>2185.65030148982</v>
      </c>
    </row>
    <row r="37" spans="2:98" ht="15" customHeight="true">
      <c r="B37" s="6">
        <v>82.5</v>
      </c>
      <c r="C37" s="6">
        <v>2875.52778240619</v>
      </c>
      <c r="D37" s="6">
        <v>2855.90620023028</v>
      </c>
      <c r="E37" s="6">
        <v>2774.20016017545</v>
      </c>
      <c r="F37" s="6">
        <v>2737.24459813883</v>
      </c>
      <c r="G37" s="6">
        <v>2757.05595155332</v>
      </c>
      <c r="H37" s="6">
        <v>2847.76919452261</v>
      </c>
      <c r="I37" s="6">
        <v>2778.61902045346</v>
      </c>
      <c r="J37" s="6">
        <v>2702.91649112529</v>
      </c>
      <c r="K37" s="6">
        <v>2715.74243840935</v>
      </c>
      <c r="L37" s="6">
        <v>2228.77161277485</v>
      </c>
      <c r="M37" s="6">
        <v>2181.10458961864</v>
      </c>
      <c r="N37" s="6">
        <v>2191.94724489915</v>
      </c>
      <c r="O37" s="6">
        <v>2836.6123989054</v>
      </c>
      <c r="P37" s="6">
        <v>2939.83266983896</v>
      </c>
      <c r="Q37" s="6">
        <v>2781.26636662787</v>
      </c>
      <c r="R37" s="6">
        <v>2764.0779312408</v>
      </c>
      <c r="S37" s="6">
        <v>2691.01332180752</v>
      </c>
      <c r="T37" s="6">
        <v>2792.55114269699</v>
      </c>
      <c r="U37" s="6">
        <v>2740.33934124396</v>
      </c>
      <c r="V37" s="6">
        <v>2677.90893086463</v>
      </c>
      <c r="W37" s="6">
        <v>2642.47714328204</v>
      </c>
      <c r="X37" s="6">
        <v>2192.64149067374</v>
      </c>
      <c r="Y37" s="6">
        <v>2191.36718351133</v>
      </c>
      <c r="Z37" s="6">
        <v>2170.96615390586</v>
      </c>
      <c r="AA37" s="6">
        <v>2944.59085615774</v>
      </c>
      <c r="AB37" s="6">
        <v>2999.3063598768</v>
      </c>
      <c r="AC37" s="6">
        <v>2871.64434187351</v>
      </c>
      <c r="AD37" s="6">
        <v>2805.06027612556</v>
      </c>
      <c r="AE37" s="6">
        <v>2802.32781872715</v>
      </c>
      <c r="AF37" s="6">
        <v>2962.7822739241</v>
      </c>
      <c r="AG37" s="6">
        <v>2846.94724935172</v>
      </c>
      <c r="AH37" s="6">
        <v>2736.44879715408</v>
      </c>
      <c r="AI37" s="6">
        <v>2681.80592068542</v>
      </c>
      <c r="AJ37" s="6">
        <v>2194.01087177909</v>
      </c>
      <c r="AK37" s="6">
        <v>2209.80595934048</v>
      </c>
      <c r="AL37" s="6">
        <v>2202.96680593169</v>
      </c>
      <c r="AM37" s="6">
        <v>2846.51976599104</v>
      </c>
      <c r="AN37" s="6">
        <v>2933.06632579231</v>
      </c>
      <c r="AO37" s="6">
        <v>2798.1435358834</v>
      </c>
      <c r="AP37" s="6">
        <v>2796.3962139714</v>
      </c>
      <c r="AQ37" s="6">
        <v>2730.89623591634</v>
      </c>
      <c r="AR37" s="6">
        <v>2798.60814165905</v>
      </c>
      <c r="AS37" s="6">
        <v>2793.22683531476</v>
      </c>
      <c r="AT37" s="6">
        <v>2864.91455205329</v>
      </c>
      <c r="AU37" s="6">
        <v>2645.54343308685</v>
      </c>
      <c r="AV37" s="6">
        <v>2188.66580834736</v>
      </c>
      <c r="AW37" s="6">
        <v>2181.19498350282</v>
      </c>
      <c r="AX37" s="6">
        <v>2216.67910242849</v>
      </c>
      <c r="AY37" s="6">
        <v>2828.6688277856</v>
      </c>
      <c r="AZ37" s="6">
        <v>2825.29147632198</v>
      </c>
      <c r="BA37" s="6">
        <v>2784.75084319468</v>
      </c>
      <c r="BB37" s="6">
        <v>2822.82168415929</v>
      </c>
      <c r="BC37" s="6">
        <v>2756.79346636565</v>
      </c>
      <c r="BD37" s="6">
        <v>2781.80570774171</v>
      </c>
      <c r="BE37" s="6">
        <v>2203.74450816609</v>
      </c>
      <c r="BF37" s="6">
        <v>2247.34757170437</v>
      </c>
      <c r="BG37" s="6">
        <v>2213.56560324822</v>
      </c>
      <c r="BH37" s="6">
        <v>2171.46963661362</v>
      </c>
      <c r="BI37" s="6">
        <v>2190.89856074055</v>
      </c>
      <c r="BJ37" s="6">
        <v>2201.68408463697</v>
      </c>
      <c r="BK37" s="6">
        <v>2754.99778108552</v>
      </c>
      <c r="BL37" s="6">
        <v>2800.61294584572</v>
      </c>
      <c r="BM37" s="6">
        <v>2737.35467663591</v>
      </c>
      <c r="BN37" s="6">
        <v>2748.30126015044</v>
      </c>
      <c r="BO37" s="6">
        <v>2689.83574650202</v>
      </c>
      <c r="BP37" s="6">
        <v>2708.64346887798</v>
      </c>
      <c r="BQ37" s="6">
        <v>2230.39315924219</v>
      </c>
      <c r="BR37" s="6">
        <v>2212.1912470395</v>
      </c>
      <c r="BS37" s="6">
        <v>2221.72808514988</v>
      </c>
      <c r="BT37" s="6">
        <v>2186.00483842712</v>
      </c>
      <c r="BU37" s="6">
        <v>2196.51637292963</v>
      </c>
      <c r="BV37" s="6">
        <v>2189.21235606399</v>
      </c>
      <c r="BW37" s="6">
        <v>2833.07544104599</v>
      </c>
      <c r="BX37" s="6">
        <v>2845.19385464509</v>
      </c>
      <c r="BY37" s="6">
        <v>2793.23545245304</v>
      </c>
      <c r="BZ37" s="6">
        <v>2789.56987492623</v>
      </c>
      <c r="CA37" s="6">
        <v>2736.23370656412</v>
      </c>
      <c r="CB37" s="6">
        <v>2841.45890688817</v>
      </c>
      <c r="CC37" s="6">
        <v>2235.73740285641</v>
      </c>
      <c r="CD37" s="6">
        <v>2208.15382883608</v>
      </c>
      <c r="CE37" s="6">
        <v>2207.62642670591</v>
      </c>
      <c r="CF37" s="6">
        <v>2187.33332870559</v>
      </c>
      <c r="CG37" s="6">
        <v>2180.21931540645</v>
      </c>
      <c r="CH37" s="6">
        <v>2167.98270416892</v>
      </c>
      <c r="CI37" s="6">
        <v>2732.68090062514</v>
      </c>
      <c r="CJ37" s="6">
        <v>2790.25822473688</v>
      </c>
      <c r="CK37" s="6">
        <v>2668.77719279686</v>
      </c>
      <c r="CL37" s="6">
        <v>2715.29930304474</v>
      </c>
      <c r="CM37" s="6">
        <v>2670.20067508344</v>
      </c>
      <c r="CN37" s="6">
        <v>2348.50040650344</v>
      </c>
      <c r="CO37" s="6">
        <v>2212.74474988606</v>
      </c>
      <c r="CP37" s="6">
        <v>2198.87646461543</v>
      </c>
      <c r="CQ37" s="6">
        <v>2262.09476884925</v>
      </c>
      <c r="CR37" s="6">
        <v>2167.47105537259</v>
      </c>
      <c r="CS37" s="6">
        <v>2183.60214277783</v>
      </c>
      <c r="CT37" s="6">
        <v>2184.96339135846</v>
      </c>
    </row>
    <row r="38" spans="2:98" ht="15" customHeight="true">
      <c r="B38" s="6">
        <v>83</v>
      </c>
      <c r="C38" s="6">
        <v>2821.53502263818</v>
      </c>
      <c r="D38" s="6">
        <v>2802.59320254999</v>
      </c>
      <c r="E38" s="6">
        <v>2683.41094739054</v>
      </c>
      <c r="F38" s="6">
        <v>2642.99505039557</v>
      </c>
      <c r="G38" s="6">
        <v>2660.7155987563</v>
      </c>
      <c r="H38" s="6">
        <v>2748.50063674364</v>
      </c>
      <c r="I38" s="6">
        <v>2682.5755702344</v>
      </c>
      <c r="J38" s="6">
        <v>2574.37438076679</v>
      </c>
      <c r="K38" s="6">
        <v>2605.1932774421</v>
      </c>
      <c r="L38" s="6">
        <v>2227.33783719999</v>
      </c>
      <c r="M38" s="6">
        <v>2180.91722257499</v>
      </c>
      <c r="N38" s="6">
        <v>2191.66434672892</v>
      </c>
      <c r="O38" s="6">
        <v>2788.56989129903</v>
      </c>
      <c r="P38" s="6">
        <v>2882.57030127007</v>
      </c>
      <c r="Q38" s="6">
        <v>2697.63908148381</v>
      </c>
      <c r="R38" s="6">
        <v>2676.18879304933</v>
      </c>
      <c r="S38" s="6">
        <v>2584.14229637143</v>
      </c>
      <c r="T38" s="6">
        <v>2699.70485563344</v>
      </c>
      <c r="U38" s="6">
        <v>2640.26766768429</v>
      </c>
      <c r="V38" s="6">
        <v>2558.58839381987</v>
      </c>
      <c r="W38" s="6">
        <v>2517.82881324481</v>
      </c>
      <c r="X38" s="6">
        <v>2191.87925594098</v>
      </c>
      <c r="Y38" s="6">
        <v>2190.87902335849</v>
      </c>
      <c r="Z38" s="6">
        <v>2170.22363252713</v>
      </c>
      <c r="AA38" s="6">
        <v>2888.75840668815</v>
      </c>
      <c r="AB38" s="6">
        <v>2937.21692131731</v>
      </c>
      <c r="AC38" s="6">
        <v>2776.91925009807</v>
      </c>
      <c r="AD38" s="6">
        <v>2701.60327210461</v>
      </c>
      <c r="AE38" s="6">
        <v>2687.63550141862</v>
      </c>
      <c r="AF38" s="6">
        <v>2869.09934560402</v>
      </c>
      <c r="AG38" s="6">
        <v>2733.14571136482</v>
      </c>
      <c r="AH38" s="6">
        <v>2601.55894961697</v>
      </c>
      <c r="AI38" s="6">
        <v>2561.41699887207</v>
      </c>
      <c r="AJ38" s="6">
        <v>2193.54250797832</v>
      </c>
      <c r="AK38" s="6">
        <v>2209.23176135554</v>
      </c>
      <c r="AL38" s="6">
        <v>2202.59317251803</v>
      </c>
      <c r="AM38" s="6">
        <v>2799.62434050343</v>
      </c>
      <c r="AN38" s="6">
        <v>2872.61092512194</v>
      </c>
      <c r="AO38" s="6">
        <v>2716.34139508611</v>
      </c>
      <c r="AP38" s="6">
        <v>2697.41642712548</v>
      </c>
      <c r="AQ38" s="6">
        <v>2629.89552501967</v>
      </c>
      <c r="AR38" s="6">
        <v>2697.17672837842</v>
      </c>
      <c r="AS38" s="6">
        <v>2693.29553258521</v>
      </c>
      <c r="AT38" s="6">
        <v>2774.81557382303</v>
      </c>
      <c r="AU38" s="6">
        <v>2521.19884713468</v>
      </c>
      <c r="AV38" s="6">
        <v>2188.22816992358</v>
      </c>
      <c r="AW38" s="6">
        <v>2181.02110169415</v>
      </c>
      <c r="AX38" s="6">
        <v>2216.45266082944</v>
      </c>
      <c r="AY38" s="6">
        <v>2763.26375156458</v>
      </c>
      <c r="AZ38" s="6">
        <v>2761.23267914213</v>
      </c>
      <c r="BA38" s="6">
        <v>2719.61307490666</v>
      </c>
      <c r="BB38" s="6">
        <v>2760.05816597151</v>
      </c>
      <c r="BC38" s="6">
        <v>2695.86343452507</v>
      </c>
      <c r="BD38" s="6">
        <v>2720.21775211906</v>
      </c>
      <c r="BE38" s="6">
        <v>2203.40066445347</v>
      </c>
      <c r="BF38" s="6">
        <v>2245.5811336068</v>
      </c>
      <c r="BG38" s="6">
        <v>2212.26377501452</v>
      </c>
      <c r="BH38" s="6">
        <v>2170.99053705853</v>
      </c>
      <c r="BI38" s="6">
        <v>2190.69480641624</v>
      </c>
      <c r="BJ38" s="6">
        <v>2201.53041036553</v>
      </c>
      <c r="BK38" s="6">
        <v>2697.21855309057</v>
      </c>
      <c r="BL38" s="6">
        <v>2741.3641123601</v>
      </c>
      <c r="BM38" s="6">
        <v>2683.23169405544</v>
      </c>
      <c r="BN38" s="6">
        <v>2692.73251659579</v>
      </c>
      <c r="BO38" s="6">
        <v>2637.49340623956</v>
      </c>
      <c r="BP38" s="6">
        <v>2654.47059035183</v>
      </c>
      <c r="BQ38" s="6">
        <v>2229.55471361941</v>
      </c>
      <c r="BR38" s="6">
        <v>2210.81458126935</v>
      </c>
      <c r="BS38" s="6">
        <v>2220.43616074457</v>
      </c>
      <c r="BT38" s="6">
        <v>2185.31033440094</v>
      </c>
      <c r="BU38" s="6">
        <v>2196.02261194343</v>
      </c>
      <c r="BV38" s="6">
        <v>2189.49150204768</v>
      </c>
      <c r="BW38" s="6">
        <v>2768.88825277649</v>
      </c>
      <c r="BX38" s="6">
        <v>2779.564735233</v>
      </c>
      <c r="BY38" s="6">
        <v>2730.59076828125</v>
      </c>
      <c r="BZ38" s="6">
        <v>2726.67143172028</v>
      </c>
      <c r="CA38" s="6">
        <v>2677.18891042294</v>
      </c>
      <c r="CB38" s="6">
        <v>2785.85897766502</v>
      </c>
      <c r="CC38" s="6">
        <v>2234.12151715983</v>
      </c>
      <c r="CD38" s="6">
        <v>2206.9109025722</v>
      </c>
      <c r="CE38" s="6">
        <v>2206.05627499822</v>
      </c>
      <c r="CF38" s="6">
        <v>2186.75899171379</v>
      </c>
      <c r="CG38" s="6">
        <v>2180.07183271953</v>
      </c>
      <c r="CH38" s="6">
        <v>2167.70083017514</v>
      </c>
      <c r="CI38" s="6">
        <v>2678.42011148137</v>
      </c>
      <c r="CJ38" s="6">
        <v>2730.36524425554</v>
      </c>
      <c r="CK38" s="6">
        <v>2617.98458760717</v>
      </c>
      <c r="CL38" s="6">
        <v>2662.44573080187</v>
      </c>
      <c r="CM38" s="6">
        <v>2616.99375357579</v>
      </c>
      <c r="CN38" s="6">
        <v>2312.54357841115</v>
      </c>
      <c r="CO38" s="6">
        <v>2212.23166098509</v>
      </c>
      <c r="CP38" s="6">
        <v>2197.99661674173</v>
      </c>
      <c r="CQ38" s="6">
        <v>2252.00978718679</v>
      </c>
      <c r="CR38" s="6">
        <v>2167.1787446848</v>
      </c>
      <c r="CS38" s="6">
        <v>2182.91656688332</v>
      </c>
      <c r="CT38" s="6">
        <v>2184.30853854828</v>
      </c>
    </row>
    <row r="39" spans="2:98" ht="15" customHeight="true">
      <c r="B39" s="6">
        <v>83.5</v>
      </c>
      <c r="C39" s="6">
        <v>2770.58835559417</v>
      </c>
      <c r="D39" s="6">
        <v>2753.05255900544</v>
      </c>
      <c r="E39" s="6">
        <v>2604.76093642292</v>
      </c>
      <c r="F39" s="6">
        <v>2561.47749101867</v>
      </c>
      <c r="G39" s="6">
        <v>2574.54078970689</v>
      </c>
      <c r="H39" s="6">
        <v>2658.8572670122</v>
      </c>
      <c r="I39" s="6">
        <v>2595.80579775125</v>
      </c>
      <c r="J39" s="6">
        <v>2458.75938533726</v>
      </c>
      <c r="K39" s="6">
        <v>2507.79350051689</v>
      </c>
      <c r="L39" s="6">
        <v>2226.15853601424</v>
      </c>
      <c r="M39" s="6">
        <v>2180.59688696468</v>
      </c>
      <c r="N39" s="6">
        <v>2191.42336295887</v>
      </c>
      <c r="O39" s="6">
        <v>2743.42986272725</v>
      </c>
      <c r="P39" s="6">
        <v>2828.93350233989</v>
      </c>
      <c r="Q39" s="6">
        <v>2624.97883651731</v>
      </c>
      <c r="R39" s="6">
        <v>2599.54867997341</v>
      </c>
      <c r="S39" s="6">
        <v>2491.40300811247</v>
      </c>
      <c r="T39" s="6">
        <v>2617.36136622791</v>
      </c>
      <c r="U39" s="6">
        <v>2552.94840757416</v>
      </c>
      <c r="V39" s="6">
        <v>2452.29622790284</v>
      </c>
      <c r="W39" s="6">
        <v>2410.05570753019</v>
      </c>
      <c r="X39" s="6">
        <v>2191.41244633168</v>
      </c>
      <c r="Y39" s="6">
        <v>2190.34224185501</v>
      </c>
      <c r="Z39" s="6">
        <v>2169.70791805085</v>
      </c>
      <c r="AA39" s="6">
        <v>2836.46015254794</v>
      </c>
      <c r="AB39" s="6">
        <v>2877.68065545631</v>
      </c>
      <c r="AC39" s="6">
        <v>2694.23958220786</v>
      </c>
      <c r="AD39" s="6">
        <v>2613.36608359095</v>
      </c>
      <c r="AE39" s="6">
        <v>2587.93500635199</v>
      </c>
      <c r="AF39" s="6">
        <v>2783.54310603773</v>
      </c>
      <c r="AG39" s="6">
        <v>2634.99539666844</v>
      </c>
      <c r="AH39" s="6">
        <v>2482.67372872629</v>
      </c>
      <c r="AI39" s="6">
        <v>2456.76411940767</v>
      </c>
      <c r="AJ39" s="6">
        <v>2193.16941592992</v>
      </c>
      <c r="AK39" s="6">
        <v>2208.77650206107</v>
      </c>
      <c r="AL39" s="6">
        <v>2202.17237199454</v>
      </c>
      <c r="AM39" s="6">
        <v>2755.27291424082</v>
      </c>
      <c r="AN39" s="6">
        <v>2815.50750752737</v>
      </c>
      <c r="AO39" s="6">
        <v>2645.08291261551</v>
      </c>
      <c r="AP39" s="6">
        <v>2613.02886719099</v>
      </c>
      <c r="AQ39" s="6">
        <v>2543.1180265453</v>
      </c>
      <c r="AR39" s="6">
        <v>2609.28420646031</v>
      </c>
      <c r="AS39" s="6">
        <v>2605.06404495205</v>
      </c>
      <c r="AT39" s="6">
        <v>2696.18526093022</v>
      </c>
      <c r="AU39" s="6">
        <v>2412.8852328503</v>
      </c>
      <c r="AV39" s="6">
        <v>2187.71726231954</v>
      </c>
      <c r="AW39" s="6">
        <v>2180.89117848384</v>
      </c>
      <c r="AX39" s="6">
        <v>2216.29957838841</v>
      </c>
      <c r="AY39" s="6">
        <v>2683.86249173661</v>
      </c>
      <c r="AZ39" s="6">
        <v>2683.43549364981</v>
      </c>
      <c r="BA39" s="6">
        <v>2642.1450688888</v>
      </c>
      <c r="BB39" s="6">
        <v>2685.15393831674</v>
      </c>
      <c r="BC39" s="6">
        <v>2624.12438266187</v>
      </c>
      <c r="BD39" s="6">
        <v>2647.25654632458</v>
      </c>
      <c r="BE39" s="6">
        <v>2203.01762060941</v>
      </c>
      <c r="BF39" s="6">
        <v>2243.94882797751</v>
      </c>
      <c r="BG39" s="6">
        <v>2210.46197150421</v>
      </c>
      <c r="BH39" s="6">
        <v>2170.8026408766</v>
      </c>
      <c r="BI39" s="6">
        <v>2190.425634625</v>
      </c>
      <c r="BJ39" s="6">
        <v>2201.41861311243</v>
      </c>
      <c r="BK39" s="6">
        <v>2626.82163369052</v>
      </c>
      <c r="BL39" s="6">
        <v>2669.70546322242</v>
      </c>
      <c r="BM39" s="6">
        <v>2618.89791103811</v>
      </c>
      <c r="BN39" s="6">
        <v>2625.82100711793</v>
      </c>
      <c r="BO39" s="6">
        <v>2575.38566055533</v>
      </c>
      <c r="BP39" s="6">
        <v>2590.32825447437</v>
      </c>
      <c r="BQ39" s="6">
        <v>2228.70157112825</v>
      </c>
      <c r="BR39" s="6">
        <v>2209.3023776455</v>
      </c>
      <c r="BS39" s="6">
        <v>2219.36853420084</v>
      </c>
      <c r="BT39" s="6">
        <v>2184.69129941894</v>
      </c>
      <c r="BU39" s="6">
        <v>2195.62417236384</v>
      </c>
      <c r="BV39" s="6">
        <v>2189.99897402826</v>
      </c>
      <c r="BW39" s="6">
        <v>2690.85226885076</v>
      </c>
      <c r="BX39" s="6">
        <v>2700.33037343935</v>
      </c>
      <c r="BY39" s="6">
        <v>2656.02348248048</v>
      </c>
      <c r="BZ39" s="6">
        <v>2651.63211115643</v>
      </c>
      <c r="CA39" s="6">
        <v>2606.83317805471</v>
      </c>
      <c r="CB39" s="6">
        <v>2720.52760517116</v>
      </c>
      <c r="CC39" s="6">
        <v>2233.05920843527</v>
      </c>
      <c r="CD39" s="6">
        <v>2205.62889012425</v>
      </c>
      <c r="CE39" s="6">
        <v>2204.7553047479</v>
      </c>
      <c r="CF39" s="6">
        <v>2186.36752528939</v>
      </c>
      <c r="CG39" s="6">
        <v>2180.06885039467</v>
      </c>
      <c r="CH39" s="6">
        <v>2167.4085342759</v>
      </c>
      <c r="CI39" s="6">
        <v>2612.43020450762</v>
      </c>
      <c r="CJ39" s="6">
        <v>2658.38286422577</v>
      </c>
      <c r="CK39" s="6">
        <v>2557.08670807023</v>
      </c>
      <c r="CL39" s="6">
        <v>2598.79635697719</v>
      </c>
      <c r="CM39" s="6">
        <v>2554.40551680945</v>
      </c>
      <c r="CN39" s="6">
        <v>2278.59375590333</v>
      </c>
      <c r="CO39" s="6">
        <v>2211.48761015622</v>
      </c>
      <c r="CP39" s="6">
        <v>2196.97286438853</v>
      </c>
      <c r="CQ39" s="6">
        <v>2241.50298810467</v>
      </c>
      <c r="CR39" s="6">
        <v>2167.02368416679</v>
      </c>
      <c r="CS39" s="6">
        <v>2182.17136065243</v>
      </c>
      <c r="CT39" s="6">
        <v>2183.93226129157</v>
      </c>
    </row>
    <row r="40" spans="2:98" ht="15" customHeight="true">
      <c r="B40" s="6">
        <v>84</v>
      </c>
      <c r="C40" s="6">
        <v>2720.53058340136</v>
      </c>
      <c r="D40" s="6">
        <v>2705.66247341199</v>
      </c>
      <c r="E40" s="6">
        <v>2540.29769172156</v>
      </c>
      <c r="F40" s="6">
        <v>2496.86434899723</v>
      </c>
      <c r="G40" s="6">
        <v>2504.3867774662</v>
      </c>
      <c r="H40" s="6">
        <v>2584.23159850376</v>
      </c>
      <c r="I40" s="6">
        <v>2523.99464014621</v>
      </c>
      <c r="J40" s="6">
        <v>2367.96693604002</v>
      </c>
      <c r="K40" s="6">
        <v>2429.6186448379</v>
      </c>
      <c r="L40" s="6">
        <v>2225.36805724671</v>
      </c>
      <c r="M40" s="6">
        <v>2180.33908100848</v>
      </c>
      <c r="N40" s="6">
        <v>2190.7940751498</v>
      </c>
      <c r="O40" s="6">
        <v>2700.1307733353</v>
      </c>
      <c r="P40" s="6">
        <v>2777.11524349362</v>
      </c>
      <c r="Q40" s="6">
        <v>2565.01477415884</v>
      </c>
      <c r="R40" s="6">
        <v>2536.99665597039</v>
      </c>
      <c r="S40" s="6">
        <v>2418.81966728477</v>
      </c>
      <c r="T40" s="6">
        <v>2550.92026152589</v>
      </c>
      <c r="U40" s="6">
        <v>2483.23152732966</v>
      </c>
      <c r="V40" s="6">
        <v>2368.65226112458</v>
      </c>
      <c r="W40" s="6">
        <v>2328.08239186384</v>
      </c>
      <c r="X40" s="6">
        <v>2190.97512987105</v>
      </c>
      <c r="Y40" s="6">
        <v>2189.66001633982</v>
      </c>
      <c r="Z40" s="6">
        <v>2169.16836745377</v>
      </c>
      <c r="AA40" s="6">
        <v>2786.18701426598</v>
      </c>
      <c r="AB40" s="6">
        <v>2819.06151706243</v>
      </c>
      <c r="AC40" s="6">
        <v>2625.79233169755</v>
      </c>
      <c r="AD40" s="6">
        <v>2543.84493656224</v>
      </c>
      <c r="AE40" s="6">
        <v>2509.35984228695</v>
      </c>
      <c r="AF40" s="6">
        <v>2707.41091680353</v>
      </c>
      <c r="AG40" s="6">
        <v>2557.18974292703</v>
      </c>
      <c r="AH40" s="6">
        <v>2390.08338989063</v>
      </c>
      <c r="AI40" s="6">
        <v>2376.0368297573</v>
      </c>
      <c r="AJ40" s="6">
        <v>2192.66763330779</v>
      </c>
      <c r="AK40" s="6">
        <v>2208.37745346971</v>
      </c>
      <c r="AL40" s="6">
        <v>2201.62027209868</v>
      </c>
      <c r="AM40" s="6">
        <v>2712.33271282686</v>
      </c>
      <c r="AN40" s="6">
        <v>2761.35870178001</v>
      </c>
      <c r="AO40" s="6">
        <v>2586.50117947574</v>
      </c>
      <c r="AP40" s="6">
        <v>2545.77676670268</v>
      </c>
      <c r="AQ40" s="6">
        <v>2474.40869883643</v>
      </c>
      <c r="AR40" s="6">
        <v>2539.57803067609</v>
      </c>
      <c r="AS40" s="6">
        <v>2531.79500412625</v>
      </c>
      <c r="AT40" s="6">
        <v>2631.25785972824</v>
      </c>
      <c r="AU40" s="6">
        <v>2329.97193193771</v>
      </c>
      <c r="AV40" s="6">
        <v>2187.02162680693</v>
      </c>
      <c r="AW40" s="6">
        <v>2180.4775888922</v>
      </c>
      <c r="AX40" s="6">
        <v>2215.85293965706</v>
      </c>
      <c r="AY40" s="6">
        <v>2592.7534303714</v>
      </c>
      <c r="AZ40" s="6">
        <v>2594.22665214659</v>
      </c>
      <c r="BA40" s="6">
        <v>2554.83403943891</v>
      </c>
      <c r="BB40" s="6">
        <v>2600.18138782343</v>
      </c>
      <c r="BC40" s="6">
        <v>2543.94237009951</v>
      </c>
      <c r="BD40" s="6">
        <v>2565.26353327865</v>
      </c>
      <c r="BE40" s="6">
        <v>2202.14773388425</v>
      </c>
      <c r="BF40" s="6">
        <v>2242.30419449094</v>
      </c>
      <c r="BG40" s="6">
        <v>2208.68407918128</v>
      </c>
      <c r="BH40" s="6">
        <v>2170.65574894206</v>
      </c>
      <c r="BI40" s="6">
        <v>2189.56441913384</v>
      </c>
      <c r="BJ40" s="6">
        <v>2201.38335927973</v>
      </c>
      <c r="BK40" s="6">
        <v>2545.63509856818</v>
      </c>
      <c r="BL40" s="6">
        <v>2586.77689768986</v>
      </c>
      <c r="BM40" s="6">
        <v>2546.62936205603</v>
      </c>
      <c r="BN40" s="6">
        <v>2549.98158377862</v>
      </c>
      <c r="BO40" s="6">
        <v>2505.62031711479</v>
      </c>
      <c r="BP40" s="6">
        <v>2518.69452144009</v>
      </c>
      <c r="BQ40" s="6">
        <v>2227.26426611032</v>
      </c>
      <c r="BR40" s="6">
        <v>2207.8596644719</v>
      </c>
      <c r="BS40" s="6">
        <v>2218.1519002922</v>
      </c>
      <c r="BT40" s="6">
        <v>2183.91477606096</v>
      </c>
      <c r="BU40" s="6">
        <v>2195.33639644848</v>
      </c>
      <c r="BV40" s="6">
        <v>2190.31662084525</v>
      </c>
      <c r="BW40" s="6">
        <v>2600.99321956554</v>
      </c>
      <c r="BX40" s="6">
        <v>2609.80067508051</v>
      </c>
      <c r="BY40" s="6">
        <v>2572.06484132411</v>
      </c>
      <c r="BZ40" s="6">
        <v>2567.3186433695</v>
      </c>
      <c r="CA40" s="6">
        <v>2528.09339285947</v>
      </c>
      <c r="CB40" s="6">
        <v>2648.06846850452</v>
      </c>
      <c r="CC40" s="6">
        <v>2231.44000051133</v>
      </c>
      <c r="CD40" s="6">
        <v>2204.16169555212</v>
      </c>
      <c r="CE40" s="6">
        <v>2203.69863586783</v>
      </c>
      <c r="CF40" s="6">
        <v>2185.77001558971</v>
      </c>
      <c r="CG40" s="6">
        <v>2179.66015640056</v>
      </c>
      <c r="CH40" s="6">
        <v>2166.88238190383</v>
      </c>
      <c r="CI40" s="6">
        <v>2536.57637943863</v>
      </c>
      <c r="CJ40" s="6">
        <v>2576.5004203986</v>
      </c>
      <c r="CK40" s="6">
        <v>2488.35537492891</v>
      </c>
      <c r="CL40" s="6">
        <v>2526.78805288135</v>
      </c>
      <c r="CM40" s="6">
        <v>2484.16294077982</v>
      </c>
      <c r="CN40" s="6">
        <v>2251.50833963911</v>
      </c>
      <c r="CO40" s="6">
        <v>2210.71915657536</v>
      </c>
      <c r="CP40" s="6">
        <v>2195.89334328388</v>
      </c>
      <c r="CQ40" s="6">
        <v>2232.96679023274</v>
      </c>
      <c r="CR40" s="6">
        <v>2166.74471183235</v>
      </c>
      <c r="CS40" s="6">
        <v>2181.35831843403</v>
      </c>
      <c r="CT40" s="6">
        <v>2183.14143363485</v>
      </c>
    </row>
    <row r="41" spans="2:98" ht="15" customHeight="true">
      <c r="B41" s="6">
        <v>84.5</v>
      </c>
      <c r="C41" s="6">
        <v>2668.73751108749</v>
      </c>
      <c r="D41" s="6">
        <v>2658.57283758445</v>
      </c>
      <c r="E41" s="6">
        <v>2488.71647524466</v>
      </c>
      <c r="F41" s="6">
        <v>2448.65952127211</v>
      </c>
      <c r="G41" s="6">
        <v>2449.95312536115</v>
      </c>
      <c r="H41" s="6">
        <v>2525.09046327577</v>
      </c>
      <c r="I41" s="6">
        <v>2466.75358228473</v>
      </c>
      <c r="J41" s="6">
        <v>2304.42627538981</v>
      </c>
      <c r="K41" s="6">
        <v>2371.08303002949</v>
      </c>
      <c r="L41" s="6">
        <v>2224.64344011126</v>
      </c>
      <c r="M41" s="6">
        <v>2179.85685139217</v>
      </c>
      <c r="N41" s="6">
        <v>2190.03940002827</v>
      </c>
      <c r="O41" s="6">
        <v>2656.53498594324</v>
      </c>
      <c r="P41" s="6">
        <v>2724.37922662874</v>
      </c>
      <c r="Q41" s="6">
        <v>2516.41682902974</v>
      </c>
      <c r="R41" s="6">
        <v>2486.86502374897</v>
      </c>
      <c r="S41" s="6">
        <v>2367.32615784452</v>
      </c>
      <c r="T41" s="6">
        <v>2499.92716318242</v>
      </c>
      <c r="U41" s="6">
        <v>2431.42260192219</v>
      </c>
      <c r="V41" s="6">
        <v>2309.88369884339</v>
      </c>
      <c r="W41" s="6">
        <v>2273.12628403418</v>
      </c>
      <c r="X41" s="6">
        <v>2190.92930942019</v>
      </c>
      <c r="Y41" s="6">
        <v>2189.18809996136</v>
      </c>
      <c r="Z41" s="6">
        <v>2168.81920680002</v>
      </c>
      <c r="AA41" s="6">
        <v>2735.60374283769</v>
      </c>
      <c r="AB41" s="6">
        <v>2759.35877413207</v>
      </c>
      <c r="AC41" s="6">
        <v>2569.12762067725</v>
      </c>
      <c r="AD41" s="6">
        <v>2491.78442873592</v>
      </c>
      <c r="AE41" s="6">
        <v>2451.09699102853</v>
      </c>
      <c r="AF41" s="6">
        <v>2640.27912849675</v>
      </c>
      <c r="AG41" s="6">
        <v>2498.5826784022</v>
      </c>
      <c r="AH41" s="6">
        <v>2325.26181137467</v>
      </c>
      <c r="AI41" s="6">
        <v>2320.06735422755</v>
      </c>
      <c r="AJ41" s="6">
        <v>2192.15565194989</v>
      </c>
      <c r="AK41" s="6">
        <v>2207.66975846242</v>
      </c>
      <c r="AL41" s="6">
        <v>2201.27734747049</v>
      </c>
      <c r="AM41" s="6">
        <v>2669.13855473388</v>
      </c>
      <c r="AN41" s="6">
        <v>2707.52837681711</v>
      </c>
      <c r="AO41" s="6">
        <v>2538.60406152754</v>
      </c>
      <c r="AP41" s="6">
        <v>2494.75807105505</v>
      </c>
      <c r="AQ41" s="6">
        <v>2422.96772370492</v>
      </c>
      <c r="AR41" s="6">
        <v>2487.2374740907</v>
      </c>
      <c r="AS41" s="6">
        <v>2472.48025264612</v>
      </c>
      <c r="AT41" s="6">
        <v>2577.62024532512</v>
      </c>
      <c r="AU41" s="6">
        <v>2274.32661627253</v>
      </c>
      <c r="AV41" s="6">
        <v>2186.34253876553</v>
      </c>
      <c r="AW41" s="6">
        <v>2180.34921614708</v>
      </c>
      <c r="AX41" s="6">
        <v>2215.13482960116</v>
      </c>
      <c r="AY41" s="6">
        <v>2494.7641360329</v>
      </c>
      <c r="AZ41" s="6">
        <v>2498.15565106046</v>
      </c>
      <c r="BA41" s="6">
        <v>2462.16638321944</v>
      </c>
      <c r="BB41" s="6">
        <v>2509.51069373104</v>
      </c>
      <c r="BC41" s="6">
        <v>2459.59215430033</v>
      </c>
      <c r="BD41" s="6">
        <v>2478.62451441324</v>
      </c>
      <c r="BE41" s="6">
        <v>2201.00431786924</v>
      </c>
      <c r="BF41" s="6">
        <v>2240.77834252085</v>
      </c>
      <c r="BG41" s="6">
        <v>2206.9499716027</v>
      </c>
      <c r="BH41" s="6">
        <v>2170.46572796961</v>
      </c>
      <c r="BI41" s="6">
        <v>2188.78480391751</v>
      </c>
      <c r="BJ41" s="6">
        <v>2201.4441733239</v>
      </c>
      <c r="BK41" s="6">
        <v>2458.28094525429</v>
      </c>
      <c r="BL41" s="6">
        <v>2496.81068514597</v>
      </c>
      <c r="BM41" s="6">
        <v>2470.51965813887</v>
      </c>
      <c r="BN41" s="6">
        <v>2468.93729126122</v>
      </c>
      <c r="BO41" s="6">
        <v>2432.0972787353</v>
      </c>
      <c r="BP41" s="6">
        <v>2443.4262734227</v>
      </c>
      <c r="BQ41" s="6">
        <v>2225.84571285637</v>
      </c>
      <c r="BR41" s="6">
        <v>2205.9990561382</v>
      </c>
      <c r="BS41" s="6">
        <v>2216.56910703471</v>
      </c>
      <c r="BT41" s="6">
        <v>2183.22379030587</v>
      </c>
      <c r="BU41" s="6">
        <v>2195.01378381007</v>
      </c>
      <c r="BV41" s="6">
        <v>2189.94335985768</v>
      </c>
      <c r="BW41" s="6">
        <v>2504.32697813149</v>
      </c>
      <c r="BX41" s="6">
        <v>2512.86283884506</v>
      </c>
      <c r="BY41" s="6">
        <v>2482.7901452852</v>
      </c>
      <c r="BZ41" s="6">
        <v>2478.03836661733</v>
      </c>
      <c r="CA41" s="6">
        <v>2444.75373300266</v>
      </c>
      <c r="CB41" s="6">
        <v>2572.2814277641</v>
      </c>
      <c r="CC41" s="6">
        <v>2229.75938386216</v>
      </c>
      <c r="CD41" s="6">
        <v>2202.84476267455</v>
      </c>
      <c r="CE41" s="6">
        <v>2202.52410231923</v>
      </c>
      <c r="CF41" s="6">
        <v>2184.87750445999</v>
      </c>
      <c r="CG41" s="6">
        <v>2179.19103520334</v>
      </c>
      <c r="CH41" s="6">
        <v>2166.44395500236</v>
      </c>
      <c r="CI41" s="6">
        <v>2455.06386622674</v>
      </c>
      <c r="CJ41" s="6">
        <v>2488.69281908812</v>
      </c>
      <c r="CK41" s="6">
        <v>2415.0207558989</v>
      </c>
      <c r="CL41" s="6">
        <v>2449.91376848632</v>
      </c>
      <c r="CM41" s="6">
        <v>2410.51030147512</v>
      </c>
      <c r="CN41" s="6">
        <v>2232.15226523671</v>
      </c>
      <c r="CO41" s="6">
        <v>2209.87149909372</v>
      </c>
      <c r="CP41" s="6">
        <v>2194.50006309698</v>
      </c>
      <c r="CQ41" s="6">
        <v>2226.57443198556</v>
      </c>
      <c r="CR41" s="6">
        <v>2166.43416766839</v>
      </c>
      <c r="CS41" s="6">
        <v>2180.57070143578</v>
      </c>
      <c r="CT41" s="6">
        <v>2182.50914872916</v>
      </c>
    </row>
    <row r="42" spans="2:98" ht="15" customHeight="true">
      <c r="B42" s="6">
        <v>85</v>
      </c>
      <c r="C42" s="6">
        <v>2612.50390268981</v>
      </c>
      <c r="D42" s="6">
        <v>2609.17024015022</v>
      </c>
      <c r="E42" s="6">
        <v>2446.24766238812</v>
      </c>
      <c r="F42" s="6">
        <v>2412.94840268293</v>
      </c>
      <c r="G42" s="6">
        <v>2408.43269802422</v>
      </c>
      <c r="H42" s="6">
        <v>2477.93661029304</v>
      </c>
      <c r="I42" s="6">
        <v>2421.69763512882</v>
      </c>
      <c r="J42" s="6">
        <v>2265.95699637748</v>
      </c>
      <c r="K42" s="6">
        <v>2328.84432197081</v>
      </c>
      <c r="L42" s="6">
        <v>2224.31280086459</v>
      </c>
      <c r="M42" s="6">
        <v>2179.35714045396</v>
      </c>
      <c r="N42" s="6">
        <v>2189.51848462925</v>
      </c>
      <c r="O42" s="6">
        <v>2610.1566495509</v>
      </c>
      <c r="P42" s="6">
        <v>2667.85430665802</v>
      </c>
      <c r="Q42" s="6">
        <v>2474.72615027178</v>
      </c>
      <c r="R42" s="6">
        <v>2445.24245683978</v>
      </c>
      <c r="S42" s="6">
        <v>2333.21789264326</v>
      </c>
      <c r="T42" s="6">
        <v>2460.63725830591</v>
      </c>
      <c r="U42" s="6">
        <v>2393.97030572475</v>
      </c>
      <c r="V42" s="6">
        <v>2273.33174582044</v>
      </c>
      <c r="W42" s="6">
        <v>2242.36893809456</v>
      </c>
      <c r="X42" s="6">
        <v>2190.77427827934</v>
      </c>
      <c r="Y42" s="6">
        <v>2188.65000662551</v>
      </c>
      <c r="Z42" s="6">
        <v>2168.71656095402</v>
      </c>
      <c r="AA42" s="6">
        <v>2681.50748381698</v>
      </c>
      <c r="AB42" s="6">
        <v>2695.54620681127</v>
      </c>
      <c r="AC42" s="6">
        <v>2519.78189575911</v>
      </c>
      <c r="AD42" s="6">
        <v>2452.90719151668</v>
      </c>
      <c r="AE42" s="6">
        <v>2408.62016040605</v>
      </c>
      <c r="AF42" s="6">
        <v>2579.72478566069</v>
      </c>
      <c r="AG42" s="6">
        <v>2454.73330156475</v>
      </c>
      <c r="AH42" s="6">
        <v>2284.84964072636</v>
      </c>
      <c r="AI42" s="6">
        <v>2285.04684486774</v>
      </c>
      <c r="AJ42" s="6">
        <v>2191.90109734942</v>
      </c>
      <c r="AK42" s="6">
        <v>2207.25650286168</v>
      </c>
      <c r="AL42" s="6">
        <v>2200.98766972538</v>
      </c>
      <c r="AM42" s="6">
        <v>2623.33088701864</v>
      </c>
      <c r="AN42" s="6">
        <v>2650.82269964351</v>
      </c>
      <c r="AO42" s="6">
        <v>2497.32968840468</v>
      </c>
      <c r="AP42" s="6">
        <v>2455.75517070567</v>
      </c>
      <c r="AQ42" s="6">
        <v>2385.08206432341</v>
      </c>
      <c r="AR42" s="6">
        <v>2448.83502774082</v>
      </c>
      <c r="AS42" s="6">
        <v>2424.1244432695</v>
      </c>
      <c r="AT42" s="6">
        <v>2531.97438105281</v>
      </c>
      <c r="AU42" s="6">
        <v>2243.14026709177</v>
      </c>
      <c r="AV42" s="6">
        <v>2185.49785108081</v>
      </c>
      <c r="AW42" s="6">
        <v>2180.05266364875</v>
      </c>
      <c r="AX42" s="6">
        <v>2214.2765586221</v>
      </c>
      <c r="AY42" s="6">
        <v>2398.1161741231</v>
      </c>
      <c r="AZ42" s="6">
        <v>2403.32199136217</v>
      </c>
      <c r="BA42" s="6">
        <v>2372.53069858333</v>
      </c>
      <c r="BB42" s="6">
        <v>2420.81988346013</v>
      </c>
      <c r="BC42" s="6">
        <v>2378.50938328913</v>
      </c>
      <c r="BD42" s="6">
        <v>2394.47291580725</v>
      </c>
      <c r="BE42" s="6">
        <v>2199.63820936713</v>
      </c>
      <c r="BF42" s="6">
        <v>2239.03460429885</v>
      </c>
      <c r="BG42" s="6">
        <v>2205.28854643312</v>
      </c>
      <c r="BH42" s="6">
        <v>2170.51854429973</v>
      </c>
      <c r="BI42" s="6">
        <v>2187.76730589917</v>
      </c>
      <c r="BJ42" s="6">
        <v>2201.97960962746</v>
      </c>
      <c r="BK42" s="6">
        <v>2371.22200414184</v>
      </c>
      <c r="BL42" s="6">
        <v>2407.93839282997</v>
      </c>
      <c r="BM42" s="6">
        <v>2396.81210438375</v>
      </c>
      <c r="BN42" s="6">
        <v>2390.203411829</v>
      </c>
      <c r="BO42" s="6">
        <v>2361.23684097411</v>
      </c>
      <c r="BP42" s="6">
        <v>2371.6935594793</v>
      </c>
      <c r="BQ42" s="6">
        <v>2224.7673503358</v>
      </c>
      <c r="BR42" s="6">
        <v>2204.07342145421</v>
      </c>
      <c r="BS42" s="6">
        <v>2214.78720892842</v>
      </c>
      <c r="BT42" s="6">
        <v>2182.3037526763</v>
      </c>
      <c r="BU42" s="6">
        <v>2195.0244579466</v>
      </c>
      <c r="BV42" s="6">
        <v>2189.47608498296</v>
      </c>
      <c r="BW42" s="6">
        <v>2408.82498658909</v>
      </c>
      <c r="BX42" s="6">
        <v>2418.17786095062</v>
      </c>
      <c r="BY42" s="6">
        <v>2396.22089705227</v>
      </c>
      <c r="BZ42" s="6">
        <v>2391.49386402118</v>
      </c>
      <c r="CA42" s="6">
        <v>2365.52110156262</v>
      </c>
      <c r="CB42" s="6">
        <v>2501.34346417046</v>
      </c>
      <c r="CC42" s="6">
        <v>2228.37132246098</v>
      </c>
      <c r="CD42" s="6">
        <v>2201.50362432278</v>
      </c>
      <c r="CE42" s="6">
        <v>2201.27411733004</v>
      </c>
      <c r="CF42" s="6">
        <v>2184.33398547084</v>
      </c>
      <c r="CG42" s="6">
        <v>2178.97614868709</v>
      </c>
      <c r="CH42" s="6">
        <v>2166.32325350049</v>
      </c>
      <c r="CI42" s="6">
        <v>2374.28009937065</v>
      </c>
      <c r="CJ42" s="6">
        <v>2403.08362251414</v>
      </c>
      <c r="CK42" s="6">
        <v>2343.83038349886</v>
      </c>
      <c r="CL42" s="6">
        <v>2375.07406861241</v>
      </c>
      <c r="CM42" s="6">
        <v>2340.41569597862</v>
      </c>
      <c r="CN42" s="6">
        <v>2219.87380403739</v>
      </c>
      <c r="CO42" s="6">
        <v>2209.0870324836</v>
      </c>
      <c r="CP42" s="6">
        <v>2192.78463271881</v>
      </c>
      <c r="CQ42" s="6">
        <v>2222.06555893941</v>
      </c>
      <c r="CR42" s="6">
        <v>2165.7673292405</v>
      </c>
      <c r="CS42" s="6">
        <v>2180.0760856488</v>
      </c>
      <c r="CT42" s="6">
        <v>2181.87413135797</v>
      </c>
    </row>
    <row r="43" spans="2:98" ht="15" customHeight="true">
      <c r="B43" s="6">
        <v>85.5</v>
      </c>
      <c r="C43" s="6">
        <v>2550.43217341197</v>
      </c>
      <c r="D43" s="6">
        <v>2554.87705363976</v>
      </c>
      <c r="E43" s="6">
        <v>2408.89980047748</v>
      </c>
      <c r="F43" s="6">
        <v>2384.63432253797</v>
      </c>
      <c r="G43" s="6">
        <v>2374.4917272169</v>
      </c>
      <c r="H43" s="6">
        <v>2437.75994403313</v>
      </c>
      <c r="I43" s="6">
        <v>2383.87331373611</v>
      </c>
      <c r="J43" s="6">
        <v>2245.66130693128</v>
      </c>
      <c r="K43" s="6">
        <v>2297.97827640133</v>
      </c>
      <c r="L43" s="6">
        <v>2223.89727831106</v>
      </c>
      <c r="M43" s="6">
        <v>2178.84118442236</v>
      </c>
      <c r="N43" s="6">
        <v>2188.97035870499</v>
      </c>
      <c r="O43" s="6">
        <v>2558.86166064122</v>
      </c>
      <c r="P43" s="6">
        <v>2605.04539696127</v>
      </c>
      <c r="Q43" s="6">
        <v>2435.76060748399</v>
      </c>
      <c r="R43" s="6">
        <v>2407.99270048705</v>
      </c>
      <c r="S43" s="6">
        <v>2310.40096942432</v>
      </c>
      <c r="T43" s="6">
        <v>2426.67095229254</v>
      </c>
      <c r="U43" s="6">
        <v>2365.15729408364</v>
      </c>
      <c r="V43" s="6">
        <v>2252.75218849434</v>
      </c>
      <c r="W43" s="6">
        <v>2228.24680503583</v>
      </c>
      <c r="X43" s="6">
        <v>2190.53342567445</v>
      </c>
      <c r="Y43" s="6">
        <v>2188.08046492386</v>
      </c>
      <c r="Z43" s="6">
        <v>2168.41611430914</v>
      </c>
      <c r="AA43" s="6">
        <v>2621.17593134015</v>
      </c>
      <c r="AB43" s="6">
        <v>2626.23463351051</v>
      </c>
      <c r="AC43" s="6">
        <v>2473.04303924721</v>
      </c>
      <c r="AD43" s="6">
        <v>2420.68417504904</v>
      </c>
      <c r="AE43" s="6">
        <v>2375.25073342647</v>
      </c>
      <c r="AF43" s="6">
        <v>2522.46363386248</v>
      </c>
      <c r="AG43" s="6">
        <v>2418.41919591734</v>
      </c>
      <c r="AH43" s="6">
        <v>2262.47598970475</v>
      </c>
      <c r="AI43" s="6">
        <v>2263.9352861038</v>
      </c>
      <c r="AJ43" s="6">
        <v>2191.3927344346</v>
      </c>
      <c r="AK43" s="6">
        <v>2207.1688873186</v>
      </c>
      <c r="AL43" s="6">
        <v>2200.56965469914</v>
      </c>
      <c r="AM43" s="6">
        <v>2572.53652429361</v>
      </c>
      <c r="AN43" s="6">
        <v>2589.46618952963</v>
      </c>
      <c r="AO43" s="6">
        <v>2458.2904212821</v>
      </c>
      <c r="AP43" s="6">
        <v>2422.85598004726</v>
      </c>
      <c r="AQ43" s="6">
        <v>2354.40897477746</v>
      </c>
      <c r="AR43" s="6">
        <v>2417.51678491157</v>
      </c>
      <c r="AS43" s="6">
        <v>2381.48261348853</v>
      </c>
      <c r="AT43" s="6">
        <v>2488.84753976328</v>
      </c>
      <c r="AU43" s="6">
        <v>2228.59756666768</v>
      </c>
      <c r="AV43" s="6">
        <v>2184.99984739495</v>
      </c>
      <c r="AW43" s="6">
        <v>2179.54556614409</v>
      </c>
      <c r="AX43" s="6">
        <v>2213.28486631293</v>
      </c>
      <c r="AY43" s="6">
        <v>2316.92127011725</v>
      </c>
      <c r="AZ43" s="6">
        <v>2324.01404610391</v>
      </c>
      <c r="BA43" s="6">
        <v>2300.02280919805</v>
      </c>
      <c r="BB43" s="6">
        <v>2347.3295097622</v>
      </c>
      <c r="BC43" s="6">
        <v>2313.25778982913</v>
      </c>
      <c r="BD43" s="6">
        <v>2325.71450998544</v>
      </c>
      <c r="BE43" s="6">
        <v>2198.28327997329</v>
      </c>
      <c r="BF43" s="6">
        <v>2237.46585987919</v>
      </c>
      <c r="BG43" s="6">
        <v>2203.73614953711</v>
      </c>
      <c r="BH43" s="6">
        <v>2170.10022498563</v>
      </c>
      <c r="BI43" s="6">
        <v>2186.43782041448</v>
      </c>
      <c r="BJ43" s="6">
        <v>2202.10084395499</v>
      </c>
      <c r="BK43" s="6">
        <v>2297.60050389147</v>
      </c>
      <c r="BL43" s="6">
        <v>2333.37588615503</v>
      </c>
      <c r="BM43" s="6">
        <v>2336.24024649001</v>
      </c>
      <c r="BN43" s="6">
        <v>2325.82545536953</v>
      </c>
      <c r="BO43" s="6">
        <v>2304.16733448111</v>
      </c>
      <c r="BP43" s="6">
        <v>2314.32150625242</v>
      </c>
      <c r="BQ43" s="6">
        <v>2223.50789756936</v>
      </c>
      <c r="BR43" s="6">
        <v>2202.24269368768</v>
      </c>
      <c r="BS43" s="6">
        <v>2212.95886171113</v>
      </c>
      <c r="BT43" s="6">
        <v>2182.10055162232</v>
      </c>
      <c r="BU43" s="6">
        <v>2194.64989496067</v>
      </c>
      <c r="BV43" s="6">
        <v>2188.74023887006</v>
      </c>
      <c r="BW43" s="6">
        <v>2328.70615397303</v>
      </c>
      <c r="BX43" s="6">
        <v>2339.19754159054</v>
      </c>
      <c r="BY43" s="6">
        <v>2325.25194965683</v>
      </c>
      <c r="BZ43" s="6">
        <v>2321.07476742503</v>
      </c>
      <c r="CA43" s="6">
        <v>2301.91267118511</v>
      </c>
      <c r="CB43" s="6">
        <v>2445.45506843778</v>
      </c>
      <c r="CC43" s="6">
        <v>2227.04461391657</v>
      </c>
      <c r="CD43" s="6">
        <v>2199.86107720117</v>
      </c>
      <c r="CE43" s="6">
        <v>2200.08082576837</v>
      </c>
      <c r="CF43" s="6">
        <v>2183.65235176441</v>
      </c>
      <c r="CG43" s="6">
        <v>2178.74453293844</v>
      </c>
      <c r="CH43" s="6">
        <v>2166.00979603593</v>
      </c>
      <c r="CI43" s="6">
        <v>2306.15770351778</v>
      </c>
      <c r="CJ43" s="6">
        <v>2332.43107412679</v>
      </c>
      <c r="CK43" s="6">
        <v>2285.65290983045</v>
      </c>
      <c r="CL43" s="6">
        <v>2314.07533422732</v>
      </c>
      <c r="CM43" s="6">
        <v>2284.12410357964</v>
      </c>
      <c r="CN43" s="6">
        <v>2213.20527017252</v>
      </c>
      <c r="CO43" s="6">
        <v>2208.19310466145</v>
      </c>
      <c r="CP43" s="6">
        <v>2191.11127572315</v>
      </c>
      <c r="CQ43" s="6">
        <v>2218.74227673337</v>
      </c>
      <c r="CR43" s="6">
        <v>2165.04980274087</v>
      </c>
      <c r="CS43" s="6">
        <v>2179.81765569957</v>
      </c>
      <c r="CT43" s="6">
        <v>2181.52765530506</v>
      </c>
    </row>
    <row r="44" spans="2:98" ht="15" customHeight="true">
      <c r="B44" s="6">
        <v>86</v>
      </c>
      <c r="C44" s="6">
        <v>2483.400093211</v>
      </c>
      <c r="D44" s="6">
        <v>2496.5565714004</v>
      </c>
      <c r="E44" s="6">
        <v>2372.148239769</v>
      </c>
      <c r="F44" s="6">
        <v>2358.43913983479</v>
      </c>
      <c r="G44" s="6">
        <v>2343.17803460203</v>
      </c>
      <c r="H44" s="6">
        <v>2399.48044260602</v>
      </c>
      <c r="I44" s="6">
        <v>2349.20519649889</v>
      </c>
      <c r="J44" s="6">
        <v>2234.59995605856</v>
      </c>
      <c r="K44" s="6">
        <v>2272.79573285804</v>
      </c>
      <c r="L44" s="6">
        <v>2223.37197150213</v>
      </c>
      <c r="M44" s="6">
        <v>2178.53068524313</v>
      </c>
      <c r="N44" s="6">
        <v>2188.27956726369</v>
      </c>
      <c r="O44" s="6">
        <v>2503.49567470244</v>
      </c>
      <c r="P44" s="6">
        <v>2537.74608903312</v>
      </c>
      <c r="Q44" s="6">
        <v>2396.06915120286</v>
      </c>
      <c r="R44" s="6">
        <v>2371.15975784014</v>
      </c>
      <c r="S44" s="6">
        <v>2291.34871335736</v>
      </c>
      <c r="T44" s="6">
        <v>2392.85216583541</v>
      </c>
      <c r="U44" s="6">
        <v>2338.83374719142</v>
      </c>
      <c r="V44" s="6">
        <v>2240.7170744241</v>
      </c>
      <c r="W44" s="6">
        <v>2221.61814196492</v>
      </c>
      <c r="X44" s="6">
        <v>2190.0603657825</v>
      </c>
      <c r="Y44" s="6">
        <v>2187.66822011599</v>
      </c>
      <c r="Z44" s="6">
        <v>2167.95262419641</v>
      </c>
      <c r="AA44" s="6">
        <v>2555.44063002283</v>
      </c>
      <c r="AB44" s="6">
        <v>2553.58944350035</v>
      </c>
      <c r="AC44" s="6">
        <v>2425.73942239626</v>
      </c>
      <c r="AD44" s="6">
        <v>2388.28834969451</v>
      </c>
      <c r="AE44" s="6">
        <v>2343.924845401</v>
      </c>
      <c r="AF44" s="6">
        <v>2466.74648162248</v>
      </c>
      <c r="AG44" s="6">
        <v>2382.4779564478</v>
      </c>
      <c r="AH44" s="6">
        <v>2248.45919384864</v>
      </c>
      <c r="AI44" s="6">
        <v>2249.754916042</v>
      </c>
      <c r="AJ44" s="6">
        <v>2190.95887481976</v>
      </c>
      <c r="AK44" s="6">
        <v>2206.98564731057</v>
      </c>
      <c r="AL44" s="6">
        <v>2200.07488588318</v>
      </c>
      <c r="AM44" s="6">
        <v>2516.93479795156</v>
      </c>
      <c r="AN44" s="6">
        <v>2524.49073153701</v>
      </c>
      <c r="AO44" s="6">
        <v>2417.52398068922</v>
      </c>
      <c r="AP44" s="6">
        <v>2390.24289438848</v>
      </c>
      <c r="AQ44" s="6">
        <v>2325.37199778247</v>
      </c>
      <c r="AR44" s="6">
        <v>2386.54457547472</v>
      </c>
      <c r="AS44" s="6">
        <v>2341.60511640237</v>
      </c>
      <c r="AT44" s="6">
        <v>2444.10708818847</v>
      </c>
      <c r="AU44" s="6">
        <v>2222.33264537872</v>
      </c>
      <c r="AV44" s="6">
        <v>2184.53340313152</v>
      </c>
      <c r="AW44" s="6">
        <v>2179.14971130908</v>
      </c>
      <c r="AX44" s="6">
        <v>2212.34204899077</v>
      </c>
      <c r="AY44" s="6">
        <v>2257.51175741438</v>
      </c>
      <c r="AZ44" s="6">
        <v>2265.4579902962</v>
      </c>
      <c r="BA44" s="6">
        <v>2247.86742921096</v>
      </c>
      <c r="BB44" s="6">
        <v>2294.06416446114</v>
      </c>
      <c r="BC44" s="6">
        <v>2266.75002155759</v>
      </c>
      <c r="BD44" s="6">
        <v>2276.73836074648</v>
      </c>
      <c r="BE44" s="6">
        <v>2196.93586177909</v>
      </c>
      <c r="BF44" s="6">
        <v>2235.78857255206</v>
      </c>
      <c r="BG44" s="6">
        <v>2202.76054056277</v>
      </c>
      <c r="BH44" s="6">
        <v>2169.54492361062</v>
      </c>
      <c r="BI44" s="6">
        <v>2185.20586920566</v>
      </c>
      <c r="BJ44" s="6">
        <v>2202.10965047567</v>
      </c>
      <c r="BK44" s="6">
        <v>2243.47006172662</v>
      </c>
      <c r="BL44" s="6">
        <v>2277.95423704677</v>
      </c>
      <c r="BM44" s="6">
        <v>2292.63484477156</v>
      </c>
      <c r="BN44" s="6">
        <v>2279.52166179224</v>
      </c>
      <c r="BO44" s="6">
        <v>2263.59741362421</v>
      </c>
      <c r="BP44" s="6">
        <v>2273.79846817015</v>
      </c>
      <c r="BQ44" s="6">
        <v>2222.31722341899</v>
      </c>
      <c r="BR44" s="6">
        <v>2200.34743618843</v>
      </c>
      <c r="BS44" s="6">
        <v>2211.35012382693</v>
      </c>
      <c r="BT44" s="6">
        <v>2182.17343671526</v>
      </c>
      <c r="BU44" s="6">
        <v>2194.21061489437</v>
      </c>
      <c r="BV44" s="6">
        <v>2187.7630900677</v>
      </c>
      <c r="BW44" s="6">
        <v>2269.56757733856</v>
      </c>
      <c r="BX44" s="6">
        <v>2281.33976382646</v>
      </c>
      <c r="BY44" s="6">
        <v>2273.97763988636</v>
      </c>
      <c r="BZ44" s="6">
        <v>2271.09473278666</v>
      </c>
      <c r="CA44" s="6">
        <v>2257.01350302326</v>
      </c>
      <c r="CB44" s="6">
        <v>2406.2547462319</v>
      </c>
      <c r="CC44" s="6">
        <v>2225.35423174389</v>
      </c>
      <c r="CD44" s="6">
        <v>2198.40263147209</v>
      </c>
      <c r="CE44" s="6">
        <v>2198.65856873927</v>
      </c>
      <c r="CF44" s="6">
        <v>2183.06929588819</v>
      </c>
      <c r="CG44" s="6">
        <v>2178.05040713102</v>
      </c>
      <c r="CH44" s="6">
        <v>2165.69242221761</v>
      </c>
      <c r="CI44" s="6">
        <v>2256.0563242684</v>
      </c>
      <c r="CJ44" s="6">
        <v>2280.81192906152</v>
      </c>
      <c r="CK44" s="6">
        <v>2243.70453035012</v>
      </c>
      <c r="CL44" s="6">
        <v>2270.22954522826</v>
      </c>
      <c r="CM44" s="6">
        <v>2244.1122778275</v>
      </c>
      <c r="CN44" s="6">
        <v>2211.12975207789</v>
      </c>
      <c r="CO44" s="6">
        <v>2207.45071079403</v>
      </c>
      <c r="CP44" s="6">
        <v>2189.45557845373</v>
      </c>
      <c r="CQ44" s="6">
        <v>2216.91024535817</v>
      </c>
      <c r="CR44" s="6">
        <v>2164.40626910125</v>
      </c>
      <c r="CS44" s="6">
        <v>2179.80856949718</v>
      </c>
      <c r="CT44" s="6">
        <v>2180.94000792675</v>
      </c>
    </row>
    <row r="45" spans="2:98" ht="15" customHeight="true">
      <c r="B45" s="6">
        <v>86.5</v>
      </c>
      <c r="C45" s="6">
        <v>2415.45566685874</v>
      </c>
      <c r="D45" s="6">
        <v>2437.03224658618</v>
      </c>
      <c r="E45" s="6">
        <v>2335.66342207896</v>
      </c>
      <c r="F45" s="6">
        <v>2332.17042129249</v>
      </c>
      <c r="G45" s="6">
        <v>2311.96847560484</v>
      </c>
      <c r="H45" s="6">
        <v>2361.34868883089</v>
      </c>
      <c r="I45" s="6">
        <v>2316.07092182982</v>
      </c>
      <c r="J45" s="6">
        <v>2226.38050179306</v>
      </c>
      <c r="K45" s="6">
        <v>2250.89749059042</v>
      </c>
      <c r="L45" s="6">
        <v>2223.07959789012</v>
      </c>
      <c r="M45" s="6">
        <v>2178.28470230144</v>
      </c>
      <c r="N45" s="6">
        <v>2187.96849115286</v>
      </c>
      <c r="O45" s="6">
        <v>2445.17062855029</v>
      </c>
      <c r="P45" s="6">
        <v>2469.41690423208</v>
      </c>
      <c r="Q45" s="6">
        <v>2355.49354346979</v>
      </c>
      <c r="R45" s="6">
        <v>2334.56832347935</v>
      </c>
      <c r="S45" s="6">
        <v>2272.36693710463</v>
      </c>
      <c r="T45" s="6">
        <v>2356.45335233491</v>
      </c>
      <c r="U45" s="6">
        <v>2313.08994799102</v>
      </c>
      <c r="V45" s="6">
        <v>2231.9902475358</v>
      </c>
      <c r="W45" s="6">
        <v>2216.99327127505</v>
      </c>
      <c r="X45" s="6">
        <v>2189.73555663768</v>
      </c>
      <c r="Y45" s="6">
        <v>2187.44348891801</v>
      </c>
      <c r="Z45" s="6">
        <v>2167.58613665052</v>
      </c>
      <c r="AA45" s="6">
        <v>2485.89112985491</v>
      </c>
      <c r="AB45" s="6">
        <v>2480.53275993374</v>
      </c>
      <c r="AC45" s="6">
        <v>2377.92733958436</v>
      </c>
      <c r="AD45" s="6">
        <v>2354.24509993653</v>
      </c>
      <c r="AE45" s="6">
        <v>2311.80944238054</v>
      </c>
      <c r="AF45" s="6">
        <v>2414.00625340335</v>
      </c>
      <c r="AG45" s="6">
        <v>2345.54502743935</v>
      </c>
      <c r="AH45" s="6">
        <v>2237.98959096762</v>
      </c>
      <c r="AI45" s="6">
        <v>2237.8558568033</v>
      </c>
      <c r="AJ45" s="6">
        <v>2190.90612061008</v>
      </c>
      <c r="AK45" s="6">
        <v>2206.75215634876</v>
      </c>
      <c r="AL45" s="6">
        <v>2199.84396804989</v>
      </c>
      <c r="AM45" s="6">
        <v>2457.30222424605</v>
      </c>
      <c r="AN45" s="6">
        <v>2457.52569202175</v>
      </c>
      <c r="AO45" s="6">
        <v>2374.78483040292</v>
      </c>
      <c r="AP45" s="6">
        <v>2357.16649002392</v>
      </c>
      <c r="AQ45" s="6">
        <v>2296.23563767441</v>
      </c>
      <c r="AR45" s="6">
        <v>2353.89713584638</v>
      </c>
      <c r="AS45" s="6">
        <v>2304.90721424749</v>
      </c>
      <c r="AT45" s="6">
        <v>2398.25945762726</v>
      </c>
      <c r="AU45" s="6">
        <v>2219.10468572713</v>
      </c>
      <c r="AV45" s="6">
        <v>2184.01680465832</v>
      </c>
      <c r="AW45" s="6">
        <v>2178.9403086519</v>
      </c>
      <c r="AX45" s="6">
        <v>2212.00073577786</v>
      </c>
      <c r="AY45" s="6">
        <v>2218.99316467975</v>
      </c>
      <c r="AZ45" s="6">
        <v>2227.33255834754</v>
      </c>
      <c r="BA45" s="6">
        <v>2214.94806873081</v>
      </c>
      <c r="BB45" s="6">
        <v>2259.79447293436</v>
      </c>
      <c r="BC45" s="6">
        <v>2237.52332413257</v>
      </c>
      <c r="BD45" s="6">
        <v>2246.17159254587</v>
      </c>
      <c r="BE45" s="6">
        <v>2195.65150154102</v>
      </c>
      <c r="BF45" s="6">
        <v>2233.90523148016</v>
      </c>
      <c r="BG45" s="6">
        <v>2202.13158251893</v>
      </c>
      <c r="BH45" s="6">
        <v>2168.92112161473</v>
      </c>
      <c r="BI45" s="6">
        <v>2184.59281617667</v>
      </c>
      <c r="BJ45" s="6">
        <v>2201.58303963532</v>
      </c>
      <c r="BK45" s="6">
        <v>2208.41797741768</v>
      </c>
      <c r="BL45" s="6">
        <v>2241.9790767653</v>
      </c>
      <c r="BM45" s="6">
        <v>2264.81588094893</v>
      </c>
      <c r="BN45" s="6">
        <v>2250.03188528002</v>
      </c>
      <c r="BO45" s="6">
        <v>2238.1975408778</v>
      </c>
      <c r="BP45" s="6">
        <v>2248.60209843085</v>
      </c>
      <c r="BQ45" s="6">
        <v>2221.70515785784</v>
      </c>
      <c r="BR45" s="6">
        <v>2199.07996259021</v>
      </c>
      <c r="BS45" s="6">
        <v>2209.9724874922</v>
      </c>
      <c r="BT45" s="6">
        <v>2182.10566973667</v>
      </c>
      <c r="BU45" s="6">
        <v>2193.50240706156</v>
      </c>
      <c r="BV45" s="6">
        <v>2187.26815029916</v>
      </c>
      <c r="BW45" s="6">
        <v>2231.24081799963</v>
      </c>
      <c r="BX45" s="6">
        <v>2243.94142177127</v>
      </c>
      <c r="BY45" s="6">
        <v>2241.30040906066</v>
      </c>
      <c r="BZ45" s="6">
        <v>2239.30083288156</v>
      </c>
      <c r="CA45" s="6">
        <v>2229.00633570234</v>
      </c>
      <c r="CB45" s="6">
        <v>2381.87518673581</v>
      </c>
      <c r="CC45" s="6">
        <v>2224.38120059725</v>
      </c>
      <c r="CD45" s="6">
        <v>2196.89423751786</v>
      </c>
      <c r="CE45" s="6">
        <v>2197.01870656258</v>
      </c>
      <c r="CF45" s="6">
        <v>2182.58636349605</v>
      </c>
      <c r="CG45" s="6">
        <v>2177.43499951806</v>
      </c>
      <c r="CH45" s="6">
        <v>2165.70238936937</v>
      </c>
      <c r="CI45" s="6">
        <v>2223.83927372405</v>
      </c>
      <c r="CJ45" s="6">
        <v>2247.81964396755</v>
      </c>
      <c r="CK45" s="6">
        <v>2217.12204005754</v>
      </c>
      <c r="CL45" s="6">
        <v>2242.44615200168</v>
      </c>
      <c r="CM45" s="6">
        <v>2219.65892547396</v>
      </c>
      <c r="CN45" s="6">
        <v>2210.32323013557</v>
      </c>
      <c r="CO45" s="6">
        <v>2206.74449545366</v>
      </c>
      <c r="CP45" s="6">
        <v>2187.92103374202</v>
      </c>
      <c r="CQ45" s="6">
        <v>2214.99894005104</v>
      </c>
      <c r="CR45" s="6">
        <v>2163.62633017868</v>
      </c>
      <c r="CS45" s="6">
        <v>2180.10580278466</v>
      </c>
      <c r="CT45" s="6">
        <v>2180.67817113229</v>
      </c>
    </row>
    <row r="46" spans="2:98" ht="15" customHeight="true">
      <c r="B46" s="6">
        <v>87</v>
      </c>
      <c r="C46" s="6">
        <v>2352.52261264188</v>
      </c>
      <c r="D46" s="6">
        <v>2380.30434124935</v>
      </c>
      <c r="E46" s="6">
        <v>2301.67121471218</v>
      </c>
      <c r="F46" s="6">
        <v>2306.36386520216</v>
      </c>
      <c r="G46" s="6">
        <v>2282.01271583476</v>
      </c>
      <c r="H46" s="6">
        <v>2324.55295199248</v>
      </c>
      <c r="I46" s="6">
        <v>2285.13551577454</v>
      </c>
      <c r="J46" s="6">
        <v>2219.20122484395</v>
      </c>
      <c r="K46" s="6">
        <v>2232.31839447608</v>
      </c>
      <c r="L46" s="6">
        <v>2222.99340431762</v>
      </c>
      <c r="M46" s="6">
        <v>2178.09574132135</v>
      </c>
      <c r="N46" s="6">
        <v>2187.64331160459</v>
      </c>
      <c r="O46" s="6">
        <v>2388.65364350779</v>
      </c>
      <c r="P46" s="6">
        <v>2406.02677156938</v>
      </c>
      <c r="Q46" s="6">
        <v>2317.2532267467</v>
      </c>
      <c r="R46" s="6">
        <v>2300.05908956307</v>
      </c>
      <c r="S46" s="6">
        <v>2253.6130371933</v>
      </c>
      <c r="T46" s="6">
        <v>2319.06623417879</v>
      </c>
      <c r="U46" s="6">
        <v>2288.19595951205</v>
      </c>
      <c r="V46" s="6">
        <v>2224.69720668199</v>
      </c>
      <c r="W46" s="6">
        <v>2213.04431400911</v>
      </c>
      <c r="X46" s="6">
        <v>2189.28722002186</v>
      </c>
      <c r="Y46" s="6">
        <v>2187.08582074955</v>
      </c>
      <c r="Z46" s="6">
        <v>2167.17568864659</v>
      </c>
      <c r="AA46" s="6">
        <v>2417.72134524481</v>
      </c>
      <c r="AB46" s="6">
        <v>2412.03041035799</v>
      </c>
      <c r="AC46" s="6">
        <v>2332.57036071928</v>
      </c>
      <c r="AD46" s="6">
        <v>2320.2701955742</v>
      </c>
      <c r="AE46" s="6">
        <v>2280.34363796687</v>
      </c>
      <c r="AF46" s="6">
        <v>2365.76310831025</v>
      </c>
      <c r="AG46" s="6">
        <v>2309.30096298472</v>
      </c>
      <c r="AH46" s="6">
        <v>2229.31936021686</v>
      </c>
      <c r="AI46" s="6">
        <v>2227.19982780692</v>
      </c>
      <c r="AJ46" s="6">
        <v>2190.67954409688</v>
      </c>
      <c r="AK46" s="6">
        <v>2206.83064372568</v>
      </c>
      <c r="AL46" s="6">
        <v>2199.4988879024</v>
      </c>
      <c r="AM46" s="6">
        <v>2397.32842396932</v>
      </c>
      <c r="AN46" s="6">
        <v>2393.39566114073</v>
      </c>
      <c r="AO46" s="6">
        <v>2332.69289996104</v>
      </c>
      <c r="AP46" s="6">
        <v>2324.51955870458</v>
      </c>
      <c r="AQ46" s="6">
        <v>2268.14641875793</v>
      </c>
      <c r="AR46" s="6">
        <v>2320.88500829039</v>
      </c>
      <c r="AS46" s="6">
        <v>2271.8564155285</v>
      </c>
      <c r="AT46" s="6">
        <v>2354.51871096435</v>
      </c>
      <c r="AU46" s="6">
        <v>2216.5467425294</v>
      </c>
      <c r="AV46" s="6">
        <v>2183.49503515056</v>
      </c>
      <c r="AW46" s="6">
        <v>2178.54984894743</v>
      </c>
      <c r="AX46" s="6">
        <v>2212.0525384979</v>
      </c>
      <c r="AY46" s="6">
        <v>2198.66441027471</v>
      </c>
      <c r="AZ46" s="6">
        <v>2206.78560667992</v>
      </c>
      <c r="BA46" s="6">
        <v>2198.23565105368</v>
      </c>
      <c r="BB46" s="6">
        <v>2241.86305471655</v>
      </c>
      <c r="BC46" s="6">
        <v>2223.11149388072</v>
      </c>
      <c r="BD46" s="6">
        <v>2230.71990739269</v>
      </c>
      <c r="BE46" s="6">
        <v>2194.73779257256</v>
      </c>
      <c r="BF46" s="6">
        <v>2232.10624133579</v>
      </c>
      <c r="BG46" s="6">
        <v>2201.43257971322</v>
      </c>
      <c r="BH46" s="6">
        <v>2168.28531601939</v>
      </c>
      <c r="BI46" s="6">
        <v>2183.96933492755</v>
      </c>
      <c r="BJ46" s="6">
        <v>2201.12750011399</v>
      </c>
      <c r="BK46" s="6">
        <v>2189.18698554781</v>
      </c>
      <c r="BL46" s="6">
        <v>2222.8747568725</v>
      </c>
      <c r="BM46" s="6">
        <v>2250.12846236348</v>
      </c>
      <c r="BN46" s="6">
        <v>2235.24908956792</v>
      </c>
      <c r="BO46" s="6">
        <v>2225.80166340665</v>
      </c>
      <c r="BP46" s="6">
        <v>2236.06491721844</v>
      </c>
      <c r="BQ46" s="6">
        <v>2221.20718754561</v>
      </c>
      <c r="BR46" s="6">
        <v>2198.26535277671</v>
      </c>
      <c r="BS46" s="6">
        <v>2208.99116338336</v>
      </c>
      <c r="BT46" s="6">
        <v>2181.69605155784</v>
      </c>
      <c r="BU46" s="6">
        <v>2192.57602710223</v>
      </c>
      <c r="BV46" s="6">
        <v>2187.22289800524</v>
      </c>
      <c r="BW46" s="6">
        <v>2210.35175056524</v>
      </c>
      <c r="BX46" s="6">
        <v>2224.13651923085</v>
      </c>
      <c r="BY46" s="6">
        <v>2224.29810910296</v>
      </c>
      <c r="BZ46" s="6">
        <v>2223.26399894104</v>
      </c>
      <c r="CA46" s="6">
        <v>2215.58114282246</v>
      </c>
      <c r="CB46" s="6">
        <v>2370.05627707228</v>
      </c>
      <c r="CC46" s="6">
        <v>2223.42817411191</v>
      </c>
      <c r="CD46" s="6">
        <v>2195.44455577094</v>
      </c>
      <c r="CE46" s="6">
        <v>2195.84637513834</v>
      </c>
      <c r="CF46" s="6">
        <v>2182.26315099438</v>
      </c>
      <c r="CG46" s="6">
        <v>2176.59880683169</v>
      </c>
      <c r="CH46" s="6">
        <v>2165.39836447331</v>
      </c>
      <c r="CI46" s="6">
        <v>2206.4205831895</v>
      </c>
      <c r="CJ46" s="6">
        <v>2230.86967744309</v>
      </c>
      <c r="CK46" s="6">
        <v>2203.71236144256</v>
      </c>
      <c r="CL46" s="6">
        <v>2228.41941284315</v>
      </c>
      <c r="CM46" s="6">
        <v>2207.27476114183</v>
      </c>
      <c r="CN46" s="6">
        <v>2209.78059063736</v>
      </c>
      <c r="CO46" s="6">
        <v>2206.14726102225</v>
      </c>
      <c r="CP46" s="6">
        <v>2186.7116471731</v>
      </c>
      <c r="CQ46" s="6">
        <v>2213.02961135766</v>
      </c>
      <c r="CR46" s="6">
        <v>2163.02853949085</v>
      </c>
      <c r="CS46" s="6">
        <v>2180.27740076204</v>
      </c>
      <c r="CT46" s="6">
        <v>2180.5785494811</v>
      </c>
    </row>
    <row r="47" spans="2:98" ht="15" customHeight="true">
      <c r="B47" s="6">
        <v>87.5</v>
      </c>
      <c r="C47" s="6">
        <v>2299.13996225911</v>
      </c>
      <c r="D47" s="6">
        <v>2330.57862015684</v>
      </c>
      <c r="E47" s="6">
        <v>2273.73578880163</v>
      </c>
      <c r="F47" s="6">
        <v>2283.68198615177</v>
      </c>
      <c r="G47" s="6">
        <v>2255.26598542899</v>
      </c>
      <c r="H47" s="6">
        <v>2292.40843713718</v>
      </c>
      <c r="I47" s="6">
        <v>2258.16208991959</v>
      </c>
      <c r="J47" s="6">
        <v>2212.93507553852</v>
      </c>
      <c r="K47" s="6">
        <v>2217.88418890939</v>
      </c>
      <c r="L47" s="6">
        <v>2222.7109869148</v>
      </c>
      <c r="M47" s="6">
        <v>2177.89792575606</v>
      </c>
      <c r="N47" s="6">
        <v>2187.05229292388</v>
      </c>
      <c r="O47" s="6">
        <v>2338.29083776798</v>
      </c>
      <c r="P47" s="6">
        <v>2352.81599969515</v>
      </c>
      <c r="Q47" s="6">
        <v>2285.60133393128</v>
      </c>
      <c r="R47" s="6">
        <v>2271.21000469317</v>
      </c>
      <c r="S47" s="6">
        <v>2236.83878881209</v>
      </c>
      <c r="T47" s="6">
        <v>2285.0183701596</v>
      </c>
      <c r="U47" s="6">
        <v>2266.08371566511</v>
      </c>
      <c r="V47" s="6">
        <v>2218.72996994089</v>
      </c>
      <c r="W47" s="6">
        <v>2209.57628869479</v>
      </c>
      <c r="X47" s="6">
        <v>2188.95250931489</v>
      </c>
      <c r="Y47" s="6">
        <v>2186.86174916963</v>
      </c>
      <c r="Z47" s="6">
        <v>2166.6679785507</v>
      </c>
      <c r="AA47" s="6">
        <v>2355.94231735271</v>
      </c>
      <c r="AB47" s="6">
        <v>2353.20347503438</v>
      </c>
      <c r="AC47" s="6">
        <v>2295.08705541028</v>
      </c>
      <c r="AD47" s="6">
        <v>2289.64372066706</v>
      </c>
      <c r="AE47" s="6">
        <v>2252.83998923749</v>
      </c>
      <c r="AF47" s="6">
        <v>2325.4416169845</v>
      </c>
      <c r="AG47" s="6">
        <v>2277.07140984025</v>
      </c>
      <c r="AH47" s="6">
        <v>2222.21023749551</v>
      </c>
      <c r="AI47" s="6">
        <v>2218.70056374188</v>
      </c>
      <c r="AJ47" s="6">
        <v>2190.30074840913</v>
      </c>
      <c r="AK47" s="6">
        <v>2206.71654250997</v>
      </c>
      <c r="AL47" s="6">
        <v>2199.65051971398</v>
      </c>
      <c r="AM47" s="6">
        <v>2341.54449675814</v>
      </c>
      <c r="AN47" s="6">
        <v>2337.33706003841</v>
      </c>
      <c r="AO47" s="6">
        <v>2295.94247632087</v>
      </c>
      <c r="AP47" s="6">
        <v>2295.75640184558</v>
      </c>
      <c r="AQ47" s="6">
        <v>2243.76471419915</v>
      </c>
      <c r="AR47" s="6">
        <v>2290.51456462807</v>
      </c>
      <c r="AS47" s="6">
        <v>2245.06719334734</v>
      </c>
      <c r="AT47" s="6">
        <v>2316.42336055472</v>
      </c>
      <c r="AU47" s="6">
        <v>2214.1534608751</v>
      </c>
      <c r="AV47" s="6">
        <v>2183.23985171633</v>
      </c>
      <c r="AW47" s="6">
        <v>2178.54363810682</v>
      </c>
      <c r="AX47" s="6">
        <v>2211.9249401093</v>
      </c>
      <c r="AY47" s="6">
        <v>2191.45746732994</v>
      </c>
      <c r="AZ47" s="6">
        <v>2199.02645523911</v>
      </c>
      <c r="BA47" s="6">
        <v>2193.03178622486</v>
      </c>
      <c r="BB47" s="6">
        <v>2235.29540066155</v>
      </c>
      <c r="BC47" s="6">
        <v>2218.91966446971</v>
      </c>
      <c r="BD47" s="6">
        <v>2226.09355124724</v>
      </c>
      <c r="BE47" s="6">
        <v>2193.89860253726</v>
      </c>
      <c r="BF47" s="6">
        <v>2230.61368437967</v>
      </c>
      <c r="BG47" s="6">
        <v>2200.87139241342</v>
      </c>
      <c r="BH47" s="6">
        <v>2167.68674520264</v>
      </c>
      <c r="BI47" s="6">
        <v>2183.69926986962</v>
      </c>
      <c r="BJ47" s="6">
        <v>2200.15906904245</v>
      </c>
      <c r="BK47" s="6">
        <v>2182.17671480762</v>
      </c>
      <c r="BL47" s="6">
        <v>2215.76823009322</v>
      </c>
      <c r="BM47" s="6">
        <v>2244.98716115468</v>
      </c>
      <c r="BN47" s="6">
        <v>2230.59821884758</v>
      </c>
      <c r="BO47" s="6">
        <v>2222.48001155523</v>
      </c>
      <c r="BP47" s="6">
        <v>2232.17734642516</v>
      </c>
      <c r="BQ47" s="6">
        <v>2220.48011012737</v>
      </c>
      <c r="BR47" s="6">
        <v>2197.58550815148</v>
      </c>
      <c r="BS47" s="6">
        <v>2208.42193134522</v>
      </c>
      <c r="BT47" s="6">
        <v>2181.44149206021</v>
      </c>
      <c r="BU47" s="6">
        <v>2191.43985420169</v>
      </c>
      <c r="BV47" s="6">
        <v>2186.99936628457</v>
      </c>
      <c r="BW47" s="6">
        <v>2202.53902441716</v>
      </c>
      <c r="BX47" s="6">
        <v>2216.72890342006</v>
      </c>
      <c r="BY47" s="6">
        <v>2218.31708517464</v>
      </c>
      <c r="BZ47" s="6">
        <v>2218.39745411923</v>
      </c>
      <c r="CA47" s="6">
        <v>2211.40263618148</v>
      </c>
      <c r="CB47" s="6">
        <v>2366.28047438296</v>
      </c>
      <c r="CC47" s="6">
        <v>2222.52761487639</v>
      </c>
      <c r="CD47" s="6">
        <v>2193.92335935646</v>
      </c>
      <c r="CE47" s="6">
        <v>2194.84543562523</v>
      </c>
      <c r="CF47" s="6">
        <v>2181.79130875274</v>
      </c>
      <c r="CG47" s="6">
        <v>2175.52769883739</v>
      </c>
      <c r="CH47" s="6">
        <v>2164.97712684572</v>
      </c>
      <c r="CI47" s="6">
        <v>2199.83835260333</v>
      </c>
      <c r="CJ47" s="6">
        <v>2224.89268868696</v>
      </c>
      <c r="CK47" s="6">
        <v>2199.34611376961</v>
      </c>
      <c r="CL47" s="6">
        <v>2224.07122239544</v>
      </c>
      <c r="CM47" s="6">
        <v>2203.32390972627</v>
      </c>
      <c r="CN47" s="6">
        <v>2209.18941103643</v>
      </c>
      <c r="CO47" s="6">
        <v>2205.5485878256</v>
      </c>
      <c r="CP47" s="6">
        <v>2185.77104924684</v>
      </c>
      <c r="CQ47" s="6">
        <v>2211.32587994364</v>
      </c>
      <c r="CR47" s="6">
        <v>2162.55250032385</v>
      </c>
      <c r="CS47" s="6">
        <v>2180.16542690069</v>
      </c>
      <c r="CT47" s="6">
        <v>2180.60157214703</v>
      </c>
    </row>
    <row r="48" spans="2:98" ht="15" customHeight="true">
      <c r="B48" s="6">
        <v>88</v>
      </c>
      <c r="C48" s="6">
        <v>2256.67277207737</v>
      </c>
      <c r="D48" s="6">
        <v>2290.63558853131</v>
      </c>
      <c r="E48" s="6">
        <v>2251.91729159379</v>
      </c>
      <c r="F48" s="6">
        <v>2265.28453028116</v>
      </c>
      <c r="G48" s="6">
        <v>2233.35177524147</v>
      </c>
      <c r="H48" s="6">
        <v>2267.05233931458</v>
      </c>
      <c r="I48" s="6">
        <v>2237.12772338186</v>
      </c>
      <c r="J48" s="6">
        <v>2208.37057821188</v>
      </c>
      <c r="K48" s="6">
        <v>2207.44489687861</v>
      </c>
      <c r="L48" s="6">
        <v>2222.41458463444</v>
      </c>
      <c r="M48" s="6">
        <v>2177.58253390345</v>
      </c>
      <c r="N48" s="6">
        <v>2186.8119273969</v>
      </c>
      <c r="O48" s="6">
        <v>2296.53148127164</v>
      </c>
      <c r="P48" s="6">
        <v>2311.86507765566</v>
      </c>
      <c r="Q48" s="6">
        <v>2261.53948830277</v>
      </c>
      <c r="R48" s="6">
        <v>2249.03901327449</v>
      </c>
      <c r="S48" s="6">
        <v>2222.59705372861</v>
      </c>
      <c r="T48" s="6">
        <v>2257.77446405973</v>
      </c>
      <c r="U48" s="6">
        <v>2248.53578816401</v>
      </c>
      <c r="V48" s="6">
        <v>2214.31587811102</v>
      </c>
      <c r="W48" s="6">
        <v>2206.88583394582</v>
      </c>
      <c r="X48" s="6">
        <v>2188.64089892689</v>
      </c>
      <c r="Y48" s="6">
        <v>2186.375617883</v>
      </c>
      <c r="Z48" s="6">
        <v>2166.65325753876</v>
      </c>
      <c r="AA48" s="6">
        <v>2304.02647195508</v>
      </c>
      <c r="AB48" s="6">
        <v>2305.43930301976</v>
      </c>
      <c r="AC48" s="6">
        <v>2266.3700849757</v>
      </c>
      <c r="AD48" s="6">
        <v>2264.02640415343</v>
      </c>
      <c r="AE48" s="6">
        <v>2230.80838125429</v>
      </c>
      <c r="AF48" s="6">
        <v>2294.4695936627</v>
      </c>
      <c r="AG48" s="6">
        <v>2251.05174985982</v>
      </c>
      <c r="AH48" s="6">
        <v>2216.4727658651</v>
      </c>
      <c r="AI48" s="6">
        <v>2213.10506655514</v>
      </c>
      <c r="AJ48" s="6">
        <v>2190.75934276635</v>
      </c>
      <c r="AK48" s="6">
        <v>2206.37626517781</v>
      </c>
      <c r="AL48" s="6">
        <v>2199.71126232494</v>
      </c>
      <c r="AM48" s="6">
        <v>2293.27136657378</v>
      </c>
      <c r="AN48" s="6">
        <v>2291.91347252494</v>
      </c>
      <c r="AO48" s="6">
        <v>2266.3188522953</v>
      </c>
      <c r="AP48" s="6">
        <v>2272.60659301606</v>
      </c>
      <c r="AQ48" s="6">
        <v>2224.33706775193</v>
      </c>
      <c r="AR48" s="6">
        <v>2265.41627082055</v>
      </c>
      <c r="AS48" s="6">
        <v>2225.37858136055</v>
      </c>
      <c r="AT48" s="6">
        <v>2286.12088461665</v>
      </c>
      <c r="AU48" s="6">
        <v>2212.80977681851</v>
      </c>
      <c r="AV48" s="6">
        <v>2182.96163374328</v>
      </c>
      <c r="AW48" s="6">
        <v>2178.45016364425</v>
      </c>
      <c r="AX48" s="6">
        <v>2212.00251514114</v>
      </c>
      <c r="AY48" s="6">
        <v>2189.61714216503</v>
      </c>
      <c r="AZ48" s="6">
        <v>2196.34186422951</v>
      </c>
      <c r="BA48" s="6">
        <v>2190.94133576873</v>
      </c>
      <c r="BB48" s="6">
        <v>2233.15917021876</v>
      </c>
      <c r="BC48" s="6">
        <v>2217.57512499766</v>
      </c>
      <c r="BD48" s="6">
        <v>2225.02953050788</v>
      </c>
      <c r="BE48" s="6">
        <v>2193.41282915908</v>
      </c>
      <c r="BF48" s="6">
        <v>2229.04743944751</v>
      </c>
      <c r="BG48" s="6">
        <v>2200.4066454369</v>
      </c>
      <c r="BH48" s="6">
        <v>2167.64471170226</v>
      </c>
      <c r="BI48" s="6">
        <v>2183.77742243278</v>
      </c>
      <c r="BJ48" s="6">
        <v>2199.49170558247</v>
      </c>
      <c r="BK48" s="6">
        <v>2179.8416207052</v>
      </c>
      <c r="BL48" s="6">
        <v>2213.12639676202</v>
      </c>
      <c r="BM48" s="6">
        <v>2243.02980158461</v>
      </c>
      <c r="BN48" s="6">
        <v>2229.03242995336</v>
      </c>
      <c r="BO48" s="6">
        <v>2221.74585638438</v>
      </c>
      <c r="BP48" s="6">
        <v>2230.72864068926</v>
      </c>
      <c r="BQ48" s="6">
        <v>2219.86253402033</v>
      </c>
      <c r="BR48" s="6">
        <v>2197.03148755087</v>
      </c>
      <c r="BS48" s="6">
        <v>2207.98487364907</v>
      </c>
      <c r="BT48" s="6">
        <v>2180.96560524257</v>
      </c>
      <c r="BU48" s="6">
        <v>2190.90864296233</v>
      </c>
      <c r="BV48" s="6">
        <v>2187.07838091608</v>
      </c>
      <c r="BW48" s="6">
        <v>2199.45761331315</v>
      </c>
      <c r="BX48" s="6">
        <v>2213.82690457492</v>
      </c>
      <c r="BY48" s="6">
        <v>2216.19901795324</v>
      </c>
      <c r="BZ48" s="6">
        <v>2216.75578585522</v>
      </c>
      <c r="CA48" s="6">
        <v>2209.9341726254</v>
      </c>
      <c r="CB48" s="6">
        <v>2364.53859329725</v>
      </c>
      <c r="CC48" s="6">
        <v>2221.94688958212</v>
      </c>
      <c r="CD48" s="6">
        <v>2193.17159031422</v>
      </c>
      <c r="CE48" s="6">
        <v>2193.60867205373</v>
      </c>
      <c r="CF48" s="6">
        <v>2181.31383779836</v>
      </c>
      <c r="CG48" s="6">
        <v>2174.64404665579</v>
      </c>
      <c r="CH48" s="6">
        <v>2164.6124592288</v>
      </c>
      <c r="CI48" s="6">
        <v>2197.45903536092</v>
      </c>
      <c r="CJ48" s="6">
        <v>2222.86189204377</v>
      </c>
      <c r="CK48" s="6">
        <v>2197.52634097843</v>
      </c>
      <c r="CL48" s="6">
        <v>2222.60698779253</v>
      </c>
      <c r="CM48" s="6">
        <v>2202.03174908778</v>
      </c>
      <c r="CN48" s="6">
        <v>2208.59050786262</v>
      </c>
      <c r="CO48" s="6">
        <v>2204.93581778352</v>
      </c>
      <c r="CP48" s="6">
        <v>2185.10529322826</v>
      </c>
      <c r="CQ48" s="6">
        <v>2210.04901793353</v>
      </c>
      <c r="CR48" s="6">
        <v>2162.30317024743</v>
      </c>
      <c r="CS48" s="6">
        <v>2180.16710434967</v>
      </c>
      <c r="CT48" s="6">
        <v>2180.40162654987</v>
      </c>
    </row>
    <row r="49" spans="2:98" ht="15" customHeight="true">
      <c r="B49" s="6">
        <v>88.5</v>
      </c>
      <c r="C49" s="6">
        <v>2226.13998908242</v>
      </c>
      <c r="D49" s="6">
        <v>2261.1672182122</v>
      </c>
      <c r="E49" s="6">
        <v>2236.1967422646</v>
      </c>
      <c r="F49" s="6">
        <v>2250.66612121638</v>
      </c>
      <c r="G49" s="6">
        <v>2216.44112830728</v>
      </c>
      <c r="H49" s="6">
        <v>2248.1316825494</v>
      </c>
      <c r="I49" s="6">
        <v>2221.18176310594</v>
      </c>
      <c r="J49" s="6">
        <v>2204.96456715749</v>
      </c>
      <c r="K49" s="6">
        <v>2200.12433494788</v>
      </c>
      <c r="L49" s="6">
        <v>2222.01905280371</v>
      </c>
      <c r="M49" s="6">
        <v>2177.22240603759</v>
      </c>
      <c r="N49" s="6">
        <v>2186.97739795835</v>
      </c>
      <c r="O49" s="6">
        <v>2264.00204882177</v>
      </c>
      <c r="P49" s="6">
        <v>2282.64847125224</v>
      </c>
      <c r="Q49" s="6">
        <v>2244.59443388596</v>
      </c>
      <c r="R49" s="6">
        <v>2233.04196620739</v>
      </c>
      <c r="S49" s="6">
        <v>2211.33940688821</v>
      </c>
      <c r="T49" s="6">
        <v>2237.20616764345</v>
      </c>
      <c r="U49" s="6">
        <v>2235.86624087374</v>
      </c>
      <c r="V49" s="6">
        <v>2210.89596477547</v>
      </c>
      <c r="W49" s="6">
        <v>2204.52000606219</v>
      </c>
      <c r="X49" s="6">
        <v>2188.60492386032</v>
      </c>
      <c r="Y49" s="6">
        <v>2185.70041866277</v>
      </c>
      <c r="Z49" s="6">
        <v>2167.01033189156</v>
      </c>
      <c r="AA49" s="6">
        <v>2262.83274165162</v>
      </c>
      <c r="AB49" s="6">
        <v>2268.72943825348</v>
      </c>
      <c r="AC49" s="6">
        <v>2245.90765054066</v>
      </c>
      <c r="AD49" s="6">
        <v>2244.19501307513</v>
      </c>
      <c r="AE49" s="6">
        <v>2214.35449866132</v>
      </c>
      <c r="AF49" s="6">
        <v>2271.41494387093</v>
      </c>
      <c r="AG49" s="6">
        <v>2232.13638690285</v>
      </c>
      <c r="AH49" s="6">
        <v>2212.23266682578</v>
      </c>
      <c r="AI49" s="6">
        <v>2208.57623569038</v>
      </c>
      <c r="AJ49" s="6">
        <v>2191.04971235122</v>
      </c>
      <c r="AK49" s="6">
        <v>2206.34396142237</v>
      </c>
      <c r="AL49" s="6">
        <v>2200.06536226918</v>
      </c>
      <c r="AM49" s="6">
        <v>2254.18528898222</v>
      </c>
      <c r="AN49" s="6">
        <v>2257.20982974398</v>
      </c>
      <c r="AO49" s="6">
        <v>2244.5216110565</v>
      </c>
      <c r="AP49" s="6">
        <v>2255.03201799054</v>
      </c>
      <c r="AQ49" s="6">
        <v>2209.97445379698</v>
      </c>
      <c r="AR49" s="6">
        <v>2246.17541525646</v>
      </c>
      <c r="AS49" s="6">
        <v>2211.5502497144</v>
      </c>
      <c r="AT49" s="6">
        <v>2263.78273886728</v>
      </c>
      <c r="AU49" s="6">
        <v>2211.73711367719</v>
      </c>
      <c r="AV49" s="6">
        <v>2182.58965304147</v>
      </c>
      <c r="AW49" s="6">
        <v>2178.34227780922</v>
      </c>
      <c r="AX49" s="6">
        <v>2212.22216174906</v>
      </c>
      <c r="AY49" s="6">
        <v>2188.81482051788</v>
      </c>
      <c r="AZ49" s="6">
        <v>2195.05084802267</v>
      </c>
      <c r="BA49" s="6">
        <v>2189.92436488135</v>
      </c>
      <c r="BB49" s="6">
        <v>2231.89120648203</v>
      </c>
      <c r="BC49" s="6">
        <v>2216.57599269804</v>
      </c>
      <c r="BD49" s="6">
        <v>2224.21244817233</v>
      </c>
      <c r="BE49" s="6">
        <v>2192.85365582024</v>
      </c>
      <c r="BF49" s="6">
        <v>2227.62132301532</v>
      </c>
      <c r="BG49" s="6">
        <v>2199.89505570192</v>
      </c>
      <c r="BH49" s="6">
        <v>2167.63127583876</v>
      </c>
      <c r="BI49" s="6">
        <v>2183.77377852362</v>
      </c>
      <c r="BJ49" s="6">
        <v>2198.83723953119</v>
      </c>
      <c r="BK49" s="6">
        <v>2178.51003045193</v>
      </c>
      <c r="BL49" s="6">
        <v>2211.64410320783</v>
      </c>
      <c r="BM49" s="6">
        <v>2241.694654217</v>
      </c>
      <c r="BN49" s="6">
        <v>2228.2008130196</v>
      </c>
      <c r="BO49" s="6">
        <v>2221.22044815354</v>
      </c>
      <c r="BP49" s="6">
        <v>2230.07257095305</v>
      </c>
      <c r="BQ49" s="6">
        <v>2219.39073596164</v>
      </c>
      <c r="BR49" s="6">
        <v>2196.81492326887</v>
      </c>
      <c r="BS49" s="6">
        <v>2207.29440572742</v>
      </c>
      <c r="BT49" s="6">
        <v>2180.274444945</v>
      </c>
      <c r="BU49" s="6">
        <v>2190.4840080617</v>
      </c>
      <c r="BV49" s="6">
        <v>2187.10382203783</v>
      </c>
      <c r="BW49" s="6">
        <v>2197.97264897079</v>
      </c>
      <c r="BX49" s="6">
        <v>2212.18697070355</v>
      </c>
      <c r="BY49" s="6">
        <v>2214.72531468159</v>
      </c>
      <c r="BZ49" s="6">
        <v>2215.06912181891</v>
      </c>
      <c r="CA49" s="6">
        <v>2209.15637180388</v>
      </c>
      <c r="CB49" s="6">
        <v>2363.03461527668</v>
      </c>
      <c r="CC49" s="6">
        <v>2221.77989113136</v>
      </c>
      <c r="CD49" s="6">
        <v>2192.68864969952</v>
      </c>
      <c r="CE49" s="6">
        <v>2192.34155291452</v>
      </c>
      <c r="CF49" s="6">
        <v>2180.92504092253</v>
      </c>
      <c r="CG49" s="6">
        <v>2174.33109825185</v>
      </c>
      <c r="CH49" s="6">
        <v>2164.51178959075</v>
      </c>
      <c r="CI49" s="6">
        <v>2196.0209136899</v>
      </c>
      <c r="CJ49" s="6">
        <v>2222.06897550108</v>
      </c>
      <c r="CK49" s="6">
        <v>2196.43879085249</v>
      </c>
      <c r="CL49" s="6">
        <v>2221.90678021174</v>
      </c>
      <c r="CM49" s="6">
        <v>2201.54648598324</v>
      </c>
      <c r="CN49" s="6">
        <v>2207.85159513931</v>
      </c>
      <c r="CO49" s="6">
        <v>2204.41959535464</v>
      </c>
      <c r="CP49" s="6">
        <v>2184.85904995893</v>
      </c>
      <c r="CQ49" s="6">
        <v>2208.65482762425</v>
      </c>
      <c r="CR49" s="6">
        <v>2161.99083638701</v>
      </c>
      <c r="CS49" s="6">
        <v>2179.85517501882</v>
      </c>
      <c r="CT49" s="6">
        <v>2180.27995267199</v>
      </c>
    </row>
    <row r="50" spans="2:98" ht="15" customHeight="true">
      <c r="B50" s="6">
        <v>89</v>
      </c>
      <c r="C50" s="6">
        <v>2207.36459997884</v>
      </c>
      <c r="D50" s="6">
        <v>2242.11364618975</v>
      </c>
      <c r="E50" s="6">
        <v>2226.36327787571</v>
      </c>
      <c r="F50" s="6">
        <v>2240.55859554312</v>
      </c>
      <c r="G50" s="6">
        <v>2204.80051037965</v>
      </c>
      <c r="H50" s="6">
        <v>2235.33177434666</v>
      </c>
      <c r="I50" s="6">
        <v>2209.86578517117</v>
      </c>
      <c r="J50" s="6">
        <v>2202.93912561493</v>
      </c>
      <c r="K50" s="6">
        <v>2195.2907703642</v>
      </c>
      <c r="L50" s="6">
        <v>2221.19982900085</v>
      </c>
      <c r="M50" s="6">
        <v>2176.79402033627</v>
      </c>
      <c r="N50" s="6">
        <v>2187.18639204509</v>
      </c>
      <c r="O50" s="6">
        <v>2242.90709032515</v>
      </c>
      <c r="P50" s="6">
        <v>2264.88726659708</v>
      </c>
      <c r="Q50" s="6">
        <v>2234.57236041495</v>
      </c>
      <c r="R50" s="6">
        <v>2222.67608974186</v>
      </c>
      <c r="S50" s="6">
        <v>2204.00765454932</v>
      </c>
      <c r="T50" s="6">
        <v>2223.89187955669</v>
      </c>
      <c r="U50" s="6">
        <v>2227.3448589438</v>
      </c>
      <c r="V50" s="6">
        <v>2208.31131896756</v>
      </c>
      <c r="W50" s="6">
        <v>2203.29752208551</v>
      </c>
      <c r="X50" s="6">
        <v>2188.31791546292</v>
      </c>
      <c r="Y50" s="6">
        <v>2184.75753436801</v>
      </c>
      <c r="Z50" s="6">
        <v>2167.33613499718</v>
      </c>
      <c r="AA50" s="6">
        <v>2235.26711419651</v>
      </c>
      <c r="AB50" s="6">
        <v>2244.36306016496</v>
      </c>
      <c r="AC50" s="6">
        <v>2233.44871628485</v>
      </c>
      <c r="AD50" s="6">
        <v>2230.70262986553</v>
      </c>
      <c r="AE50" s="6">
        <v>2203.45807874517</v>
      </c>
      <c r="AF50" s="6">
        <v>2255.9639692961</v>
      </c>
      <c r="AG50" s="6">
        <v>2219.72331337868</v>
      </c>
      <c r="AH50" s="6">
        <v>2208.86979177077</v>
      </c>
      <c r="AI50" s="6">
        <v>2205.25608552347</v>
      </c>
      <c r="AJ50" s="6">
        <v>2190.80752661717</v>
      </c>
      <c r="AK50" s="6">
        <v>2206.25477240345</v>
      </c>
      <c r="AL50" s="6">
        <v>2200.11395857156</v>
      </c>
      <c r="AM50" s="6">
        <v>2227.03712893785</v>
      </c>
      <c r="AN50" s="6">
        <v>2234.59464043287</v>
      </c>
      <c r="AO50" s="6">
        <v>2230.4579424604</v>
      </c>
      <c r="AP50" s="6">
        <v>2243.32355617899</v>
      </c>
      <c r="AQ50" s="6">
        <v>2200.7602268481</v>
      </c>
      <c r="AR50" s="6">
        <v>2233.3310144289</v>
      </c>
      <c r="AS50" s="6">
        <v>2202.05752543325</v>
      </c>
      <c r="AT50" s="6">
        <v>2248.96040918774</v>
      </c>
      <c r="AU50" s="6">
        <v>2210.65329344696</v>
      </c>
      <c r="AV50" s="6">
        <v>2181.80045666032</v>
      </c>
      <c r="AW50" s="6">
        <v>2177.98813423684</v>
      </c>
      <c r="AX50" s="6">
        <v>2212.04726117545</v>
      </c>
      <c r="AY50" s="6">
        <v>2188.39953696539</v>
      </c>
      <c r="AZ50" s="6">
        <v>2193.91410944945</v>
      </c>
      <c r="BA50" s="6">
        <v>2188.92662065038</v>
      </c>
      <c r="BB50" s="6">
        <v>2231.06045585324</v>
      </c>
      <c r="BC50" s="6">
        <v>2215.76292648629</v>
      </c>
      <c r="BD50" s="6">
        <v>2222.90740127451</v>
      </c>
      <c r="BE50" s="6">
        <v>2192.52601263127</v>
      </c>
      <c r="BF50" s="6">
        <v>2226.52574275661</v>
      </c>
      <c r="BG50" s="6">
        <v>2199.15027011895</v>
      </c>
      <c r="BH50" s="6">
        <v>2167.6154662114</v>
      </c>
      <c r="BI50" s="6">
        <v>2183.38362593868</v>
      </c>
      <c r="BJ50" s="6">
        <v>2198.69635520684</v>
      </c>
      <c r="BK50" s="6">
        <v>2177.53350655024</v>
      </c>
      <c r="BL50" s="6">
        <v>2210.17936405494</v>
      </c>
      <c r="BM50" s="6">
        <v>2240.50164162442</v>
      </c>
      <c r="BN50" s="6">
        <v>2227.62373952907</v>
      </c>
      <c r="BO50" s="6">
        <v>2220.82717717266</v>
      </c>
      <c r="BP50" s="6">
        <v>2229.60880094631</v>
      </c>
      <c r="BQ50" s="6">
        <v>2218.75632297305</v>
      </c>
      <c r="BR50" s="6">
        <v>2195.89944688053</v>
      </c>
      <c r="BS50" s="6">
        <v>2206.57374683941</v>
      </c>
      <c r="BT50" s="6">
        <v>2179.94824576532</v>
      </c>
      <c r="BU50" s="6">
        <v>2190.55298380902</v>
      </c>
      <c r="BV50" s="6">
        <v>2186.61238659098</v>
      </c>
      <c r="BW50" s="6">
        <v>2196.70262846966</v>
      </c>
      <c r="BX50" s="6">
        <v>2210.9247087564</v>
      </c>
      <c r="BY50" s="6">
        <v>2213.36598664778</v>
      </c>
      <c r="BZ50" s="6">
        <v>2213.70628144702</v>
      </c>
      <c r="CA50" s="6">
        <v>2208.75974807747</v>
      </c>
      <c r="CB50" s="6">
        <v>2361.63650100057</v>
      </c>
      <c r="CC50" s="6">
        <v>2221.11175192744</v>
      </c>
      <c r="CD50" s="6">
        <v>2192.68102648678</v>
      </c>
      <c r="CE50" s="6">
        <v>2191.2903222217</v>
      </c>
      <c r="CF50" s="6">
        <v>2180.64221020662</v>
      </c>
      <c r="CG50" s="6">
        <v>2173.99954872795</v>
      </c>
      <c r="CH50" s="6">
        <v>2164.06860986702</v>
      </c>
      <c r="CI50" s="6">
        <v>2194.66677031583</v>
      </c>
      <c r="CJ50" s="6">
        <v>2221.22922900603</v>
      </c>
      <c r="CK50" s="6">
        <v>2195.39444596442</v>
      </c>
      <c r="CL50" s="6">
        <v>2221.30409211202</v>
      </c>
      <c r="CM50" s="6">
        <v>2200.63082932919</v>
      </c>
      <c r="CN50" s="6">
        <v>2207.24522125483</v>
      </c>
      <c r="CO50" s="6">
        <v>2203.73302783541</v>
      </c>
      <c r="CP50" s="6">
        <v>2184.61939567084</v>
      </c>
      <c r="CQ50" s="6">
        <v>2207.92234245626</v>
      </c>
      <c r="CR50" s="6">
        <v>2162.01991118389</v>
      </c>
      <c r="CS50" s="6">
        <v>2179.11270988953</v>
      </c>
      <c r="CT50" s="6">
        <v>2180.18346309903</v>
      </c>
    </row>
    <row r="51" spans="2:98" ht="15" customHeight="true">
      <c r="B51" s="6">
        <v>89.5</v>
      </c>
      <c r="C51" s="6">
        <v>2196.51239724013</v>
      </c>
      <c r="D51" s="6">
        <v>2231.47408094213</v>
      </c>
      <c r="E51" s="6">
        <v>2220.84381173326</v>
      </c>
      <c r="F51" s="6">
        <v>2234.28088785431</v>
      </c>
      <c r="G51" s="6">
        <v>2197.68788038555</v>
      </c>
      <c r="H51" s="6">
        <v>2227.62428362176</v>
      </c>
      <c r="I51" s="6">
        <v>2203.10125764855</v>
      </c>
      <c r="J51" s="6">
        <v>2201.99040196463</v>
      </c>
      <c r="K51" s="6">
        <v>2192.07961573744</v>
      </c>
      <c r="L51" s="6">
        <v>2220.09551178914</v>
      </c>
      <c r="M51" s="6">
        <v>2176.06489878583</v>
      </c>
      <c r="N51" s="6">
        <v>2187.41593238029</v>
      </c>
      <c r="O51" s="6">
        <v>2230.3110281073</v>
      </c>
      <c r="P51" s="6">
        <v>2255.3902099957</v>
      </c>
      <c r="Q51" s="6">
        <v>2229.1834806689</v>
      </c>
      <c r="R51" s="6">
        <v>2216.81575880441</v>
      </c>
      <c r="S51" s="6">
        <v>2199.45925259182</v>
      </c>
      <c r="T51" s="6">
        <v>2216.76175543122</v>
      </c>
      <c r="U51" s="6">
        <v>2222.02999020738</v>
      </c>
      <c r="V51" s="6">
        <v>2206.53964901685</v>
      </c>
      <c r="W51" s="6">
        <v>2202.55723985854</v>
      </c>
      <c r="X51" s="6">
        <v>2188.05977349657</v>
      </c>
      <c r="Y51" s="6">
        <v>2184.0553672815</v>
      </c>
      <c r="Z51" s="6">
        <v>2167.47208526059</v>
      </c>
      <c r="AA51" s="6">
        <v>2218.48792132111</v>
      </c>
      <c r="AB51" s="6">
        <v>2229.52167058751</v>
      </c>
      <c r="AC51" s="6">
        <v>2227.28481150201</v>
      </c>
      <c r="AD51" s="6">
        <v>2222.41515317764</v>
      </c>
      <c r="AE51" s="6">
        <v>2197.04423380386</v>
      </c>
      <c r="AF51" s="6">
        <v>2247.06663636805</v>
      </c>
      <c r="AG51" s="6">
        <v>2212.50575466647</v>
      </c>
      <c r="AH51" s="6">
        <v>2206.21852460979</v>
      </c>
      <c r="AI51" s="6">
        <v>2203.27815923656</v>
      </c>
      <c r="AJ51" s="6">
        <v>2190.53197897274</v>
      </c>
      <c r="AK51" s="6">
        <v>2205.9243608365</v>
      </c>
      <c r="AL51" s="6">
        <v>2199.94494469744</v>
      </c>
      <c r="AM51" s="6">
        <v>2210.13992559935</v>
      </c>
      <c r="AN51" s="6">
        <v>2221.2505837939</v>
      </c>
      <c r="AO51" s="6">
        <v>2222.68479503715</v>
      </c>
      <c r="AP51" s="6">
        <v>2236.59960320623</v>
      </c>
      <c r="AQ51" s="6">
        <v>2195.50820629487</v>
      </c>
      <c r="AR51" s="6">
        <v>2225.96564797445</v>
      </c>
      <c r="AS51" s="6">
        <v>2196.83102900268</v>
      </c>
      <c r="AT51" s="6">
        <v>2240.08252655105</v>
      </c>
      <c r="AU51" s="6">
        <v>2209.9667982704</v>
      </c>
      <c r="AV51" s="6">
        <v>2181.08617671755</v>
      </c>
      <c r="AW51" s="6">
        <v>2177.82867318814</v>
      </c>
      <c r="AX51" s="6">
        <v>2211.68022753341</v>
      </c>
      <c r="AY51" s="6">
        <v>2187.94305422004</v>
      </c>
      <c r="AZ51" s="6">
        <v>2193.16315276192</v>
      </c>
      <c r="BA51" s="6">
        <v>2187.9202061305</v>
      </c>
      <c r="BB51" s="6">
        <v>2230.40457169932</v>
      </c>
      <c r="BC51" s="6">
        <v>2214.22173756952</v>
      </c>
      <c r="BD51" s="6">
        <v>2221.97700021178</v>
      </c>
      <c r="BE51" s="6">
        <v>2191.85207504945</v>
      </c>
      <c r="BF51" s="6">
        <v>2225.55839929611</v>
      </c>
      <c r="BG51" s="6">
        <v>2198.53170744416</v>
      </c>
      <c r="BH51" s="6">
        <v>2167.59873191566</v>
      </c>
      <c r="BI51" s="6">
        <v>2183.18136100559</v>
      </c>
      <c r="BJ51" s="6">
        <v>2198.07055029184</v>
      </c>
      <c r="BK51" s="6">
        <v>2176.64833557388</v>
      </c>
      <c r="BL51" s="6">
        <v>2208.83562656153</v>
      </c>
      <c r="BM51" s="6">
        <v>2239.52428834937</v>
      </c>
      <c r="BN51" s="6">
        <v>2226.95040803928</v>
      </c>
      <c r="BO51" s="6">
        <v>2220.01021892325</v>
      </c>
      <c r="BP51" s="6">
        <v>2229.37432990125</v>
      </c>
      <c r="BQ51" s="6">
        <v>2218.00895416132</v>
      </c>
      <c r="BR51" s="6">
        <v>2194.83291771096</v>
      </c>
      <c r="BS51" s="6">
        <v>2205.46131526338</v>
      </c>
      <c r="BT51" s="6">
        <v>2179.68611553195</v>
      </c>
      <c r="BU51" s="6">
        <v>2190.92966928989</v>
      </c>
      <c r="BV51" s="6">
        <v>2185.79762974471</v>
      </c>
      <c r="BW51" s="6">
        <v>2195.8211548111</v>
      </c>
      <c r="BX51" s="6">
        <v>2209.56689241542</v>
      </c>
      <c r="BY51" s="6">
        <v>2212.40658782455</v>
      </c>
      <c r="BZ51" s="6">
        <v>2212.34141926014</v>
      </c>
      <c r="CA51" s="6">
        <v>2208.49648115178</v>
      </c>
      <c r="CB51" s="6">
        <v>2360.11589385845</v>
      </c>
      <c r="CC51" s="6">
        <v>2220.7121899961</v>
      </c>
      <c r="CD51" s="6">
        <v>2192.81477471665</v>
      </c>
      <c r="CE51" s="6">
        <v>2189.95717171512</v>
      </c>
      <c r="CF51" s="6">
        <v>2180.57710599053</v>
      </c>
      <c r="CG51" s="6">
        <v>2173.99048069315</v>
      </c>
      <c r="CH51" s="6">
        <v>2163.93535142093</v>
      </c>
      <c r="CI51" s="6">
        <v>2193.46610721478</v>
      </c>
      <c r="CJ51" s="6">
        <v>2220.32105016508</v>
      </c>
      <c r="CK51" s="6">
        <v>2194.14835496156</v>
      </c>
      <c r="CL51" s="6">
        <v>2220.63399486413</v>
      </c>
      <c r="CM51" s="6">
        <v>2200.09373024358</v>
      </c>
      <c r="CN51" s="6">
        <v>2206.5961104916</v>
      </c>
      <c r="CO51" s="6">
        <v>2203.36191537928</v>
      </c>
      <c r="CP51" s="6">
        <v>2184.25108595396</v>
      </c>
      <c r="CQ51" s="6">
        <v>2207.33389340644</v>
      </c>
      <c r="CR51" s="6">
        <v>2161.87490804061</v>
      </c>
      <c r="CS51" s="6">
        <v>2178.33267297173</v>
      </c>
      <c r="CT51" s="6">
        <v>2179.88513717979</v>
      </c>
    </row>
    <row r="52" spans="2:98" ht="15" customHeight="true">
      <c r="B52" s="6">
        <v>90</v>
      </c>
      <c r="C52" s="6">
        <v>2190.52070901128</v>
      </c>
      <c r="D52" s="6">
        <v>2226.01101994635</v>
      </c>
      <c r="E52" s="6">
        <v>2217.47649477335</v>
      </c>
      <c r="F52" s="6">
        <v>2230.09482937394</v>
      </c>
      <c r="G52" s="6">
        <v>2193.44245689635</v>
      </c>
      <c r="H52" s="6">
        <v>2223.28275250195</v>
      </c>
      <c r="I52" s="6">
        <v>2199.39270977445</v>
      </c>
      <c r="J52" s="6">
        <v>2201.10050443671</v>
      </c>
      <c r="K52" s="6">
        <v>2189.98269732229</v>
      </c>
      <c r="L52" s="6">
        <v>2219.09408718911</v>
      </c>
      <c r="M52" s="6">
        <v>2175.1327513125</v>
      </c>
      <c r="N52" s="6">
        <v>2187.55277168402</v>
      </c>
      <c r="O52" s="6">
        <v>2223.34578335568</v>
      </c>
      <c r="P52" s="6">
        <v>2250.39969325344</v>
      </c>
      <c r="Q52" s="6">
        <v>2226.03738822117</v>
      </c>
      <c r="R52" s="6">
        <v>2213.41273140629</v>
      </c>
      <c r="S52" s="6">
        <v>2196.36660251249</v>
      </c>
      <c r="T52" s="6">
        <v>2213.08351114772</v>
      </c>
      <c r="U52" s="6">
        <v>2219.03740866037</v>
      </c>
      <c r="V52" s="6">
        <v>2205.41891017007</v>
      </c>
      <c r="W52" s="6">
        <v>2201.68663716661</v>
      </c>
      <c r="X52" s="6">
        <v>2187.41226270932</v>
      </c>
      <c r="Y52" s="6">
        <v>2183.24527251396</v>
      </c>
      <c r="Z52" s="6">
        <v>2167.93896327362</v>
      </c>
      <c r="AA52" s="6">
        <v>2209.40739334378</v>
      </c>
      <c r="AB52" s="6">
        <v>2220.70584835237</v>
      </c>
      <c r="AC52" s="6">
        <v>2223.5967389189</v>
      </c>
      <c r="AD52" s="6">
        <v>2217.373812737</v>
      </c>
      <c r="AE52" s="6">
        <v>2193.16578215003</v>
      </c>
      <c r="AF52" s="6">
        <v>2241.77732700794</v>
      </c>
      <c r="AG52" s="6">
        <v>2208.80210463316</v>
      </c>
      <c r="AH52" s="6">
        <v>2204.31878559288</v>
      </c>
      <c r="AI52" s="6">
        <v>2201.44588077703</v>
      </c>
      <c r="AJ52" s="6">
        <v>2190.45293569024</v>
      </c>
      <c r="AK52" s="6">
        <v>2205.53834145952</v>
      </c>
      <c r="AL52" s="6">
        <v>2199.25972492314</v>
      </c>
      <c r="AM52" s="6">
        <v>2200.70805462196</v>
      </c>
      <c r="AN52" s="6">
        <v>2213.71960496791</v>
      </c>
      <c r="AO52" s="6">
        <v>2218.2771643901</v>
      </c>
      <c r="AP52" s="6">
        <v>2232.58690308379</v>
      </c>
      <c r="AQ52" s="6">
        <v>2192.4822051544</v>
      </c>
      <c r="AR52" s="6">
        <v>2222.07762007472</v>
      </c>
      <c r="AS52" s="6">
        <v>2193.71169300291</v>
      </c>
      <c r="AT52" s="6">
        <v>2234.99771963501</v>
      </c>
      <c r="AU52" s="6">
        <v>2209.13387602526</v>
      </c>
      <c r="AV52" s="6">
        <v>2180.28695587238</v>
      </c>
      <c r="AW52" s="6">
        <v>2177.27767714476</v>
      </c>
      <c r="AX52" s="6">
        <v>2211.37272312153</v>
      </c>
      <c r="AY52" s="6">
        <v>2187.40534160679</v>
      </c>
      <c r="AZ52" s="6">
        <v>2191.97229824813</v>
      </c>
      <c r="BA52" s="6">
        <v>2186.61607016138</v>
      </c>
      <c r="BB52" s="6">
        <v>2230.17554390343</v>
      </c>
      <c r="BC52" s="6">
        <v>2212.81636995278</v>
      </c>
      <c r="BD52" s="6">
        <v>2221.14694462561</v>
      </c>
      <c r="BE52" s="6">
        <v>2191.26072242285</v>
      </c>
      <c r="BF52" s="6">
        <v>2224.73375827436</v>
      </c>
      <c r="BG52" s="6">
        <v>2197.53065506115</v>
      </c>
      <c r="BH52" s="6">
        <v>2167.39664999496</v>
      </c>
      <c r="BI52" s="6">
        <v>2182.81144723444</v>
      </c>
      <c r="BJ52" s="6">
        <v>2197.67536855646</v>
      </c>
      <c r="BK52" s="6">
        <v>2175.45134516196</v>
      </c>
      <c r="BL52" s="6">
        <v>2207.69953048868</v>
      </c>
      <c r="BM52" s="6">
        <v>2238.20370043854</v>
      </c>
      <c r="BN52" s="6">
        <v>2226.07818101223</v>
      </c>
      <c r="BO52" s="6">
        <v>2218.99160358672</v>
      </c>
      <c r="BP52" s="6">
        <v>2228.74586003473</v>
      </c>
      <c r="BQ52" s="6">
        <v>2217.40218735948</v>
      </c>
      <c r="BR52" s="6">
        <v>2193.85253354477</v>
      </c>
      <c r="BS52" s="6">
        <v>2204.09024884288</v>
      </c>
      <c r="BT52" s="6">
        <v>2179.31194904175</v>
      </c>
      <c r="BU52" s="6">
        <v>2191.18127207569</v>
      </c>
      <c r="BV52" s="6">
        <v>2185.38667135923</v>
      </c>
      <c r="BW52" s="6">
        <v>2194.98401470868</v>
      </c>
      <c r="BX52" s="6">
        <v>2208.22736715069</v>
      </c>
      <c r="BY52" s="6">
        <v>2211.60296163186</v>
      </c>
      <c r="BZ52" s="6">
        <v>2210.75040530203</v>
      </c>
      <c r="CA52" s="6">
        <v>2208.36754572118</v>
      </c>
      <c r="CB52" s="6">
        <v>2358.08703566346</v>
      </c>
      <c r="CC52" s="6">
        <v>2220.27012959644</v>
      </c>
      <c r="CD52" s="6">
        <v>2193.14989109001</v>
      </c>
      <c r="CE52" s="6">
        <v>2188.60511044905</v>
      </c>
      <c r="CF52" s="6">
        <v>2180.35235458486</v>
      </c>
      <c r="CG52" s="6">
        <v>2174.00119952546</v>
      </c>
      <c r="CH52" s="6">
        <v>2163.63309024464</v>
      </c>
      <c r="CI52" s="6">
        <v>2192.43499470892</v>
      </c>
      <c r="CJ52" s="6">
        <v>2219.27217507888</v>
      </c>
      <c r="CK52" s="6">
        <v>2192.69354860745</v>
      </c>
      <c r="CL52" s="6">
        <v>2219.82765753138</v>
      </c>
      <c r="CM52" s="6">
        <v>2199.43102583333</v>
      </c>
      <c r="CN52" s="6">
        <v>2205.90400549337</v>
      </c>
      <c r="CO52" s="6">
        <v>2202.99643466175</v>
      </c>
      <c r="CP52" s="6">
        <v>2183.92349292006</v>
      </c>
      <c r="CQ52" s="6">
        <v>2206.65270018109</v>
      </c>
      <c r="CR52" s="6">
        <v>2161.74604271062</v>
      </c>
      <c r="CS52" s="6">
        <v>2177.49656000144</v>
      </c>
      <c r="CT52" s="6">
        <v>2179.57409260724</v>
      </c>
    </row>
    <row r="53" spans="2:98" ht="15" customHeight="true">
      <c r="B53" s="6">
        <v>90.5</v>
      </c>
      <c r="C53" s="6">
        <v>2188.06602271144</v>
      </c>
      <c r="D53" s="6">
        <v>2223.70027916397</v>
      </c>
      <c r="E53" s="6">
        <v>2215.62169037112</v>
      </c>
      <c r="F53" s="6">
        <v>2227.47982530434</v>
      </c>
      <c r="G53" s="6">
        <v>2191.23027723489</v>
      </c>
      <c r="H53" s="6">
        <v>2220.60189936856</v>
      </c>
      <c r="I53" s="6">
        <v>2197.12250650542</v>
      </c>
      <c r="J53" s="6">
        <v>2199.99099839525</v>
      </c>
      <c r="K53" s="6">
        <v>2188.4590626562</v>
      </c>
      <c r="L53" s="6">
        <v>2218.20669034416</v>
      </c>
      <c r="M53" s="6">
        <v>2174.47792947682</v>
      </c>
      <c r="N53" s="6">
        <v>2187.05874277682</v>
      </c>
      <c r="O53" s="6">
        <v>2219.81255731436</v>
      </c>
      <c r="P53" s="6">
        <v>2248.19972290945</v>
      </c>
      <c r="Q53" s="6">
        <v>2223.95443128488</v>
      </c>
      <c r="R53" s="6">
        <v>2211.08342735718</v>
      </c>
      <c r="S53" s="6">
        <v>2194.36853203331</v>
      </c>
      <c r="T53" s="6">
        <v>2210.88076441322</v>
      </c>
      <c r="U53" s="6">
        <v>2217.23966455553</v>
      </c>
      <c r="V53" s="6">
        <v>2204.43597621333</v>
      </c>
      <c r="W53" s="6">
        <v>2200.72295454753</v>
      </c>
      <c r="X53" s="6">
        <v>2186.76425862503</v>
      </c>
      <c r="Y53" s="6">
        <v>2182.61110445162</v>
      </c>
      <c r="Z53" s="6">
        <v>2168.08136287057</v>
      </c>
      <c r="AA53" s="6">
        <v>2205.17717688138</v>
      </c>
      <c r="AB53" s="6">
        <v>2216.35333910251</v>
      </c>
      <c r="AC53" s="6">
        <v>2221.52338716045</v>
      </c>
      <c r="AD53" s="6">
        <v>2214.38427704514</v>
      </c>
      <c r="AE53" s="6">
        <v>2190.91450483245</v>
      </c>
      <c r="AF53" s="6">
        <v>2238.87243632405</v>
      </c>
      <c r="AG53" s="6">
        <v>2206.83927758629</v>
      </c>
      <c r="AH53" s="6">
        <v>2202.98748223204</v>
      </c>
      <c r="AI53" s="6">
        <v>2199.32545152188</v>
      </c>
      <c r="AJ53" s="6">
        <v>2189.64449320306</v>
      </c>
      <c r="AK53" s="6">
        <v>2205.03205838975</v>
      </c>
      <c r="AL53" s="6">
        <v>2198.78952533385</v>
      </c>
      <c r="AM53" s="6">
        <v>2196.11765869649</v>
      </c>
      <c r="AN53" s="6">
        <v>2209.7655225529</v>
      </c>
      <c r="AO53" s="6">
        <v>2215.93053866192</v>
      </c>
      <c r="AP53" s="6">
        <v>2229.86821394013</v>
      </c>
      <c r="AQ53" s="6">
        <v>2190.71768479423</v>
      </c>
      <c r="AR53" s="6">
        <v>2219.63970009456</v>
      </c>
      <c r="AS53" s="6">
        <v>2191.7827033555</v>
      </c>
      <c r="AT53" s="6">
        <v>2231.80519950647</v>
      </c>
      <c r="AU53" s="6">
        <v>2207.84891085204</v>
      </c>
      <c r="AV53" s="6">
        <v>2179.26543823136</v>
      </c>
      <c r="AW53" s="6">
        <v>2176.66248971692</v>
      </c>
      <c r="AX53" s="6">
        <v>2211.02122427075</v>
      </c>
      <c r="AY53" s="6">
        <v>2186.78919142852</v>
      </c>
      <c r="AZ53" s="6">
        <v>2190.58849143276</v>
      </c>
      <c r="BA53" s="6">
        <v>2185.48901573986</v>
      </c>
      <c r="BB53" s="6">
        <v>2229.81933797898</v>
      </c>
      <c r="BC53" s="6">
        <v>2211.47078168562</v>
      </c>
      <c r="BD53" s="6">
        <v>2220.08624765549</v>
      </c>
      <c r="BE53" s="6">
        <v>2190.52862046384</v>
      </c>
      <c r="BF53" s="6">
        <v>2224.0724132922</v>
      </c>
      <c r="BG53" s="6">
        <v>2196.2608358799</v>
      </c>
      <c r="BH53" s="6">
        <v>2167.03907463898</v>
      </c>
      <c r="BI53" s="6">
        <v>2182.49271055414</v>
      </c>
      <c r="BJ53" s="6">
        <v>2196.92972304338</v>
      </c>
      <c r="BK53" s="6">
        <v>2174.30324659996</v>
      </c>
      <c r="BL53" s="6">
        <v>2206.66200361004</v>
      </c>
      <c r="BM53" s="6">
        <v>2237.15250290313</v>
      </c>
      <c r="BN53" s="6">
        <v>2225.24268865978</v>
      </c>
      <c r="BO53" s="6">
        <v>2217.75647015932</v>
      </c>
      <c r="BP53" s="6">
        <v>2228.14247576234</v>
      </c>
      <c r="BQ53" s="6">
        <v>2216.73219136871</v>
      </c>
      <c r="BR53" s="6">
        <v>2192.83402928936</v>
      </c>
      <c r="BS53" s="6">
        <v>2202.87043653098</v>
      </c>
      <c r="BT53" s="6">
        <v>2178.99475196221</v>
      </c>
      <c r="BU53" s="6">
        <v>2190.69949530298</v>
      </c>
      <c r="BV53" s="6">
        <v>2184.6100227446</v>
      </c>
      <c r="BW53" s="6">
        <v>2194.36675795698</v>
      </c>
      <c r="BX53" s="6">
        <v>2207.09104784193</v>
      </c>
      <c r="BY53" s="6">
        <v>2210.69003532837</v>
      </c>
      <c r="BZ53" s="6">
        <v>2209.60210131953</v>
      </c>
      <c r="CA53" s="6">
        <v>2208.31349845033</v>
      </c>
      <c r="CB53" s="6">
        <v>2356.03402455422</v>
      </c>
      <c r="CC53" s="6">
        <v>2219.31543529978</v>
      </c>
      <c r="CD53" s="6">
        <v>2192.85352801562</v>
      </c>
      <c r="CE53" s="6">
        <v>2187.61372626422</v>
      </c>
      <c r="CF53" s="6">
        <v>2180.48965648239</v>
      </c>
      <c r="CG53" s="6">
        <v>2173.64742095897</v>
      </c>
      <c r="CH53" s="6">
        <v>2163.14517663767</v>
      </c>
      <c r="CI53" s="6">
        <v>2191.64782658586</v>
      </c>
      <c r="CJ53" s="6">
        <v>2218.17415792266</v>
      </c>
      <c r="CK53" s="6">
        <v>2191.68151856683</v>
      </c>
      <c r="CL53" s="6">
        <v>2218.89222542993</v>
      </c>
      <c r="CM53" s="6">
        <v>2198.74168012038</v>
      </c>
      <c r="CN53" s="6">
        <v>2205.25341879629</v>
      </c>
      <c r="CO53" s="6">
        <v>2202.34026690952</v>
      </c>
      <c r="CP53" s="6">
        <v>2183.36636253323</v>
      </c>
      <c r="CQ53" s="6">
        <v>2206.10232075397</v>
      </c>
      <c r="CR53" s="6">
        <v>2161.29859583293</v>
      </c>
      <c r="CS53" s="6">
        <v>2176.44232235319</v>
      </c>
      <c r="CT53" s="6">
        <v>2179.30703354162</v>
      </c>
    </row>
    <row r="54" spans="2:98" ht="15" customHeight="true">
      <c r="B54" s="6">
        <v>91</v>
      </c>
      <c r="C54" s="6">
        <v>2186.84440592095</v>
      </c>
      <c r="D54" s="6">
        <v>2222.35520226221</v>
      </c>
      <c r="E54" s="6">
        <v>2214.28763063928</v>
      </c>
      <c r="F54" s="6">
        <v>2225.79356139132</v>
      </c>
      <c r="G54" s="6">
        <v>2190.07340824658</v>
      </c>
      <c r="H54" s="6">
        <v>2219.00726144876</v>
      </c>
      <c r="I54" s="6">
        <v>2195.88771303418</v>
      </c>
      <c r="J54" s="6">
        <v>2198.81963066043</v>
      </c>
      <c r="K54" s="6">
        <v>2187.17138732523</v>
      </c>
      <c r="L54" s="6">
        <v>2217.26626355802</v>
      </c>
      <c r="M54" s="6">
        <v>2173.79874134613</v>
      </c>
      <c r="N54" s="6">
        <v>2186.11817724999</v>
      </c>
      <c r="O54" s="6">
        <v>2218.39401138802</v>
      </c>
      <c r="P54" s="6">
        <v>2247.2592610621</v>
      </c>
      <c r="Q54" s="6">
        <v>2222.5802923766</v>
      </c>
      <c r="R54" s="6">
        <v>2209.49442684607</v>
      </c>
      <c r="S54" s="6">
        <v>2193.02337872332</v>
      </c>
      <c r="T54" s="6">
        <v>2209.42946673658</v>
      </c>
      <c r="U54" s="6">
        <v>2215.85926636978</v>
      </c>
      <c r="V54" s="6">
        <v>2203.66838099434</v>
      </c>
      <c r="W54" s="6">
        <v>2200.25543557</v>
      </c>
      <c r="X54" s="6">
        <v>2185.9427886961</v>
      </c>
      <c r="Y54" s="6">
        <v>2182.24346027406</v>
      </c>
      <c r="Z54" s="6">
        <v>2167.84576418365</v>
      </c>
      <c r="AA54" s="6">
        <v>2204.0642620562</v>
      </c>
      <c r="AB54" s="6">
        <v>2214.48871545449</v>
      </c>
      <c r="AC54" s="6">
        <v>2220.44296963912</v>
      </c>
      <c r="AD54" s="6">
        <v>2212.82322369974</v>
      </c>
      <c r="AE54" s="6">
        <v>2189.16360036988</v>
      </c>
      <c r="AF54" s="6">
        <v>2237.7552863496</v>
      </c>
      <c r="AG54" s="6">
        <v>2205.56236850828</v>
      </c>
      <c r="AH54" s="6">
        <v>2201.80780711239</v>
      </c>
      <c r="AI54" s="6">
        <v>2197.87925891141</v>
      </c>
      <c r="AJ54" s="6">
        <v>2188.80858725098</v>
      </c>
      <c r="AK54" s="6">
        <v>2204.25394051775</v>
      </c>
      <c r="AL54" s="6">
        <v>2197.93662523731</v>
      </c>
      <c r="AM54" s="6">
        <v>2194.3636039525</v>
      </c>
      <c r="AN54" s="6">
        <v>2208.09821607604</v>
      </c>
      <c r="AO54" s="6">
        <v>2214.3672558588</v>
      </c>
      <c r="AP54" s="6">
        <v>2228.45010253462</v>
      </c>
      <c r="AQ54" s="6">
        <v>2189.53756697678</v>
      </c>
      <c r="AR54" s="6">
        <v>2218.07154260015</v>
      </c>
      <c r="AS54" s="6">
        <v>2190.62121609007</v>
      </c>
      <c r="AT54" s="6">
        <v>2230.2189174424</v>
      </c>
      <c r="AU54" s="6">
        <v>2206.42040179656</v>
      </c>
      <c r="AV54" s="6">
        <v>2178.36550466608</v>
      </c>
      <c r="AW54" s="6">
        <v>2175.69344990138</v>
      </c>
      <c r="AX54" s="6">
        <v>2210.55837790534</v>
      </c>
      <c r="AY54" s="6">
        <v>2185.91705155847</v>
      </c>
      <c r="AZ54" s="6">
        <v>2189.25925379864</v>
      </c>
      <c r="BA54" s="6">
        <v>2184.1267435828</v>
      </c>
      <c r="BB54" s="6">
        <v>2229.06735546499</v>
      </c>
      <c r="BC54" s="6">
        <v>2210.05391956395</v>
      </c>
      <c r="BD54" s="6">
        <v>2219.01488620926</v>
      </c>
      <c r="BE54" s="6">
        <v>2189.67499505594</v>
      </c>
      <c r="BF54" s="6">
        <v>2223.39562659907</v>
      </c>
      <c r="BG54" s="6">
        <v>2194.82812784739</v>
      </c>
      <c r="BH54" s="6">
        <v>2166.50024938193</v>
      </c>
      <c r="BI54" s="6">
        <v>2182.31228560251</v>
      </c>
      <c r="BJ54" s="6">
        <v>2196.11009502274</v>
      </c>
      <c r="BK54" s="6">
        <v>2173.12824708637</v>
      </c>
      <c r="BL54" s="6">
        <v>2205.74456955496</v>
      </c>
      <c r="BM54" s="6">
        <v>2236.20503742223</v>
      </c>
      <c r="BN54" s="6">
        <v>2224.17306653709</v>
      </c>
      <c r="BO54" s="6">
        <v>2216.60267924311</v>
      </c>
      <c r="BP54" s="6">
        <v>2227.00875178218</v>
      </c>
      <c r="BQ54" s="6">
        <v>2215.72603121643</v>
      </c>
      <c r="BR54" s="6">
        <v>2191.62591803376</v>
      </c>
      <c r="BS54" s="6">
        <v>2201.77439183038</v>
      </c>
      <c r="BT54" s="6">
        <v>2178.53398805503</v>
      </c>
      <c r="BU54" s="6">
        <v>2190.12166110333</v>
      </c>
      <c r="BV54" s="6">
        <v>2183.73116327946</v>
      </c>
      <c r="BW54" s="6">
        <v>2193.26952979567</v>
      </c>
      <c r="BX54" s="6">
        <v>2205.61394501138</v>
      </c>
      <c r="BY54" s="6">
        <v>2209.70897854348</v>
      </c>
      <c r="BZ54" s="6">
        <v>2208.86956075643</v>
      </c>
      <c r="CA54" s="6">
        <v>2207.69214101622</v>
      </c>
      <c r="CB54" s="6">
        <v>2353.86455149117</v>
      </c>
      <c r="CC54" s="6">
        <v>2217.7526070714</v>
      </c>
      <c r="CD54" s="6">
        <v>2192.19378765775</v>
      </c>
      <c r="CE54" s="6">
        <v>2186.92289008634</v>
      </c>
      <c r="CF54" s="6">
        <v>2180.23589592502</v>
      </c>
      <c r="CG54" s="6">
        <v>2172.82363582667</v>
      </c>
      <c r="CH54" s="6">
        <v>2162.13133874657</v>
      </c>
      <c r="CI54" s="6">
        <v>2190.92685890949</v>
      </c>
      <c r="CJ54" s="6">
        <v>2216.89007244492</v>
      </c>
      <c r="CK54" s="6">
        <v>2190.5677401663</v>
      </c>
      <c r="CL54" s="6">
        <v>2217.59608938538</v>
      </c>
      <c r="CM54" s="6">
        <v>2197.31766072163</v>
      </c>
      <c r="CN54" s="6">
        <v>2204.29231348866</v>
      </c>
      <c r="CO54" s="6">
        <v>2201.49178373111</v>
      </c>
      <c r="CP54" s="6">
        <v>2182.55782649125</v>
      </c>
      <c r="CQ54" s="6">
        <v>2205.51569409422</v>
      </c>
      <c r="CR54" s="6">
        <v>2160.64431967181</v>
      </c>
      <c r="CS54" s="6">
        <v>2175.50606940528</v>
      </c>
      <c r="CT54" s="6">
        <v>2178.86033083864</v>
      </c>
    </row>
    <row r="55" spans="2:98" ht="15" customHeight="true">
      <c r="B55" s="6">
        <v>91.5</v>
      </c>
      <c r="C55" s="6">
        <v>2185.49488724683</v>
      </c>
      <c r="D55" s="6">
        <v>2221.17631808228</v>
      </c>
      <c r="E55" s="6">
        <v>2213.35718290557</v>
      </c>
      <c r="F55" s="6">
        <v>2224.35616212521</v>
      </c>
      <c r="G55" s="6">
        <v>2189.51273577808</v>
      </c>
      <c r="H55" s="6">
        <v>2217.89279211342</v>
      </c>
      <c r="I55" s="6">
        <v>2195.21151906158</v>
      </c>
      <c r="J55" s="6">
        <v>2197.377578924</v>
      </c>
      <c r="K55" s="6">
        <v>2186.20307847192</v>
      </c>
      <c r="L55" s="6">
        <v>2216.59705097786</v>
      </c>
      <c r="M55" s="6">
        <v>2173.16268603424</v>
      </c>
      <c r="N55" s="6">
        <v>2185.1771801745</v>
      </c>
      <c r="O55" s="6">
        <v>2217.09814950524</v>
      </c>
      <c r="P55" s="6">
        <v>2246.39391895039</v>
      </c>
      <c r="Q55" s="6">
        <v>2221.31848240722</v>
      </c>
      <c r="R55" s="6">
        <v>2208.38860448861</v>
      </c>
      <c r="S55" s="6">
        <v>2191.7197708009</v>
      </c>
      <c r="T55" s="6">
        <v>2208.34882222024</v>
      </c>
      <c r="U55" s="6">
        <v>2215.10214536199</v>
      </c>
      <c r="V55" s="6">
        <v>2202.8284908404</v>
      </c>
      <c r="W55" s="6">
        <v>2199.52126343522</v>
      </c>
      <c r="X55" s="6">
        <v>2185.145163157</v>
      </c>
      <c r="Y55" s="6">
        <v>2182.06333347116</v>
      </c>
      <c r="Z55" s="6">
        <v>2167.56082881799</v>
      </c>
      <c r="AA55" s="6">
        <v>2203.10969472228</v>
      </c>
      <c r="AB55" s="6">
        <v>2212.96515815825</v>
      </c>
      <c r="AC55" s="6">
        <v>2219.40105545503</v>
      </c>
      <c r="AD55" s="6">
        <v>2211.70351851464</v>
      </c>
      <c r="AE55" s="6">
        <v>2188.07426251966</v>
      </c>
      <c r="AF55" s="6">
        <v>2236.74161565759</v>
      </c>
      <c r="AG55" s="6">
        <v>2204.61697774189</v>
      </c>
      <c r="AH55" s="6">
        <v>2200.862297699</v>
      </c>
      <c r="AI55" s="6">
        <v>2196.94289618683</v>
      </c>
      <c r="AJ55" s="6">
        <v>2187.89516747634</v>
      </c>
      <c r="AK55" s="6">
        <v>2203.47397850821</v>
      </c>
      <c r="AL55" s="6">
        <v>2196.9616393975</v>
      </c>
      <c r="AM55" s="6">
        <v>2193.19279703991</v>
      </c>
      <c r="AN55" s="6">
        <v>2206.61386997139</v>
      </c>
      <c r="AO55" s="6">
        <v>2212.99957620361</v>
      </c>
      <c r="AP55" s="6">
        <v>2227.19352892884</v>
      </c>
      <c r="AQ55" s="6">
        <v>2188.64012570304</v>
      </c>
      <c r="AR55" s="6">
        <v>2216.66072914151</v>
      </c>
      <c r="AS55" s="6">
        <v>2189.88655389431</v>
      </c>
      <c r="AT55" s="6">
        <v>2228.99928445873</v>
      </c>
      <c r="AU55" s="6">
        <v>2205.24632102157</v>
      </c>
      <c r="AV55" s="6">
        <v>2178.24416212049</v>
      </c>
      <c r="AW55" s="6">
        <v>2174.93023709653</v>
      </c>
      <c r="AX55" s="6">
        <v>2210.01375849867</v>
      </c>
      <c r="AY55" s="6">
        <v>2185.007948885</v>
      </c>
      <c r="AZ55" s="6">
        <v>2188.07105391179</v>
      </c>
      <c r="BA55" s="6">
        <v>2182.83134272328</v>
      </c>
      <c r="BB55" s="6">
        <v>2228.26895804258</v>
      </c>
      <c r="BC55" s="6">
        <v>2208.49402922425</v>
      </c>
      <c r="BD55" s="6">
        <v>2218.35552182946</v>
      </c>
      <c r="BE55" s="6">
        <v>2188.5831358734</v>
      </c>
      <c r="BF55" s="6">
        <v>2222.62389932162</v>
      </c>
      <c r="BG55" s="6">
        <v>2193.37278671385</v>
      </c>
      <c r="BH55" s="6">
        <v>2166.0223356584</v>
      </c>
      <c r="BI55" s="6">
        <v>2182.35601715672</v>
      </c>
      <c r="BJ55" s="6">
        <v>2195.13580509218</v>
      </c>
      <c r="BK55" s="6">
        <v>2171.66960330127</v>
      </c>
      <c r="BL55" s="6">
        <v>2204.9090860563</v>
      </c>
      <c r="BM55" s="6">
        <v>2235.31640745509</v>
      </c>
      <c r="BN55" s="6">
        <v>2223.16791298167</v>
      </c>
      <c r="BO55" s="6">
        <v>2215.46744109134</v>
      </c>
      <c r="BP55" s="6">
        <v>2225.83496387204</v>
      </c>
      <c r="BQ55" s="6">
        <v>2214.45815723046</v>
      </c>
      <c r="BR55" s="6">
        <v>2190.71899462715</v>
      </c>
      <c r="BS55" s="6">
        <v>2200.41671773616</v>
      </c>
      <c r="BT55" s="6">
        <v>2177.93477088843</v>
      </c>
      <c r="BU55" s="6">
        <v>2189.223324791</v>
      </c>
      <c r="BV55" s="6">
        <v>2183.09217626118</v>
      </c>
      <c r="BW55" s="6">
        <v>2192.19772598091</v>
      </c>
      <c r="BX55" s="6">
        <v>2204.0607075799</v>
      </c>
      <c r="BY55" s="6">
        <v>2208.68649296945</v>
      </c>
      <c r="BZ55" s="6">
        <v>2208.24027393691</v>
      </c>
      <c r="CA55" s="6">
        <v>2206.76760752773</v>
      </c>
      <c r="CB55" s="6">
        <v>2351.76218132522</v>
      </c>
      <c r="CC55" s="6">
        <v>2216.50808323686</v>
      </c>
      <c r="CD55" s="6">
        <v>2190.9998083639</v>
      </c>
      <c r="CE55" s="6">
        <v>2186.23812104949</v>
      </c>
      <c r="CF55" s="6">
        <v>2179.90229477222</v>
      </c>
      <c r="CG55" s="6">
        <v>2172.08230423456</v>
      </c>
      <c r="CH55" s="6">
        <v>2161.43685001224</v>
      </c>
      <c r="CI55" s="6">
        <v>2190.15909569116</v>
      </c>
      <c r="CJ55" s="6">
        <v>2215.74170258405</v>
      </c>
      <c r="CK55" s="6">
        <v>2189.31940594458</v>
      </c>
      <c r="CL55" s="6">
        <v>2216.09001714681</v>
      </c>
      <c r="CM55" s="6">
        <v>2196.13314260708</v>
      </c>
      <c r="CN55" s="6">
        <v>2203.32458258329</v>
      </c>
      <c r="CO55" s="6">
        <v>2200.83975979416</v>
      </c>
      <c r="CP55" s="6">
        <v>2181.74590906908</v>
      </c>
      <c r="CQ55" s="6">
        <v>2204.50081335262</v>
      </c>
      <c r="CR55" s="6">
        <v>2159.9378511125</v>
      </c>
      <c r="CS55" s="6">
        <v>2174.74383745984</v>
      </c>
      <c r="CT55" s="6">
        <v>2178.21094029855</v>
      </c>
    </row>
    <row r="56" spans="2:98" ht="15" customHeight="true">
      <c r="B56" s="6">
        <v>92</v>
      </c>
      <c r="C56" s="6">
        <v>2184.37902896256</v>
      </c>
      <c r="D56" s="6">
        <v>2219.82292784294</v>
      </c>
      <c r="E56" s="6">
        <v>2212.6205740316</v>
      </c>
      <c r="F56" s="6">
        <v>2223.2815374705</v>
      </c>
      <c r="G56" s="6">
        <v>2188.99786389208</v>
      </c>
      <c r="H56" s="6">
        <v>2217.01506380956</v>
      </c>
      <c r="I56" s="6">
        <v>2194.45348986536</v>
      </c>
      <c r="J56" s="6">
        <v>2195.81127277563</v>
      </c>
      <c r="K56" s="6">
        <v>2185.52857292996</v>
      </c>
      <c r="L56" s="6">
        <v>2216.14359373938</v>
      </c>
      <c r="M56" s="6">
        <v>2172.88630342038</v>
      </c>
      <c r="N56" s="6">
        <v>2184.26421110788</v>
      </c>
      <c r="O56" s="6">
        <v>2215.65356509363</v>
      </c>
      <c r="P56" s="6">
        <v>2245.12610634145</v>
      </c>
      <c r="Q56" s="6">
        <v>2220.01735381553</v>
      </c>
      <c r="R56" s="6">
        <v>2207.47871907301</v>
      </c>
      <c r="S56" s="6">
        <v>2190.56401627692</v>
      </c>
      <c r="T56" s="6">
        <v>2207.19639755208</v>
      </c>
      <c r="U56" s="6">
        <v>2214.82183724165</v>
      </c>
      <c r="V56" s="6">
        <v>2201.97416254595</v>
      </c>
      <c r="W56" s="6">
        <v>2198.81662714849</v>
      </c>
      <c r="X56" s="6">
        <v>2184.24898634728</v>
      </c>
      <c r="Y56" s="6">
        <v>2181.68412906121</v>
      </c>
      <c r="Z56" s="6">
        <v>2167.48442764794</v>
      </c>
      <c r="AA56" s="6">
        <v>2202.2191924052</v>
      </c>
      <c r="AB56" s="6">
        <v>2211.62966136993</v>
      </c>
      <c r="AC56" s="6">
        <v>2218.26839879241</v>
      </c>
      <c r="AD56" s="6">
        <v>2210.75678950316</v>
      </c>
      <c r="AE56" s="6">
        <v>2187.23582454381</v>
      </c>
      <c r="AF56" s="6">
        <v>2235.57080971611</v>
      </c>
      <c r="AG56" s="6">
        <v>2203.94602331449</v>
      </c>
      <c r="AH56" s="6">
        <v>2199.99199220512</v>
      </c>
      <c r="AI56" s="6">
        <v>2195.86770862332</v>
      </c>
      <c r="AJ56" s="6">
        <v>2187.24398706623</v>
      </c>
      <c r="AK56" s="6">
        <v>2202.67661568261</v>
      </c>
      <c r="AL56" s="6">
        <v>2196.26360847004</v>
      </c>
      <c r="AM56" s="6">
        <v>2192.13377186302</v>
      </c>
      <c r="AN56" s="6">
        <v>2205.21676861486</v>
      </c>
      <c r="AO56" s="6">
        <v>2211.90367774613</v>
      </c>
      <c r="AP56" s="6">
        <v>2226.09051951257</v>
      </c>
      <c r="AQ56" s="6">
        <v>2187.95322244477</v>
      </c>
      <c r="AR56" s="6">
        <v>2215.12102910109</v>
      </c>
      <c r="AS56" s="6">
        <v>2188.97172647301</v>
      </c>
      <c r="AT56" s="6">
        <v>2227.88516476577</v>
      </c>
      <c r="AU56" s="6">
        <v>2204.03170670215</v>
      </c>
      <c r="AV56" s="6">
        <v>2178.10475934172</v>
      </c>
      <c r="AW56" s="6">
        <v>2173.84939083802</v>
      </c>
      <c r="AX56" s="6">
        <v>2209.1698028037</v>
      </c>
      <c r="AY56" s="6">
        <v>2183.96852490836</v>
      </c>
      <c r="AZ56" s="6">
        <v>2186.78377953785</v>
      </c>
      <c r="BA56" s="6">
        <v>2181.71682442849</v>
      </c>
      <c r="BB56" s="6">
        <v>2227.26426195482</v>
      </c>
      <c r="BC56" s="6">
        <v>2207.77715094572</v>
      </c>
      <c r="BD56" s="6">
        <v>2217.17821577524</v>
      </c>
      <c r="BE56" s="6">
        <v>2187.67203194138</v>
      </c>
      <c r="BF56" s="6">
        <v>2221.8419018866</v>
      </c>
      <c r="BG56" s="6">
        <v>2192.00874924234</v>
      </c>
      <c r="BH56" s="6">
        <v>2165.79155248467</v>
      </c>
      <c r="BI56" s="6">
        <v>2182.28907735245</v>
      </c>
      <c r="BJ56" s="6">
        <v>2194.35230862947</v>
      </c>
      <c r="BK56" s="6">
        <v>2170.44522661804</v>
      </c>
      <c r="BL56" s="6">
        <v>2204.20830171334</v>
      </c>
      <c r="BM56" s="6">
        <v>2234.37470160865</v>
      </c>
      <c r="BN56" s="6">
        <v>2222.05061478768</v>
      </c>
      <c r="BO56" s="6">
        <v>2214.68083437388</v>
      </c>
      <c r="BP56" s="6">
        <v>2224.48154671992</v>
      </c>
      <c r="BQ56" s="6">
        <v>2213.33234501158</v>
      </c>
      <c r="BR56" s="6">
        <v>2189.93996394516</v>
      </c>
      <c r="BS56" s="6">
        <v>2199.4202671003</v>
      </c>
      <c r="BT56" s="6">
        <v>2177.29667907503</v>
      </c>
      <c r="BU56" s="6">
        <v>2188.36329406196</v>
      </c>
      <c r="BV56" s="6">
        <v>2182.72342136565</v>
      </c>
      <c r="BW56" s="6">
        <v>2191.33689485563</v>
      </c>
      <c r="BX56" s="6">
        <v>2202.55239409498</v>
      </c>
      <c r="BY56" s="6">
        <v>2207.33381691996</v>
      </c>
      <c r="BZ56" s="6">
        <v>2207.62859575256</v>
      </c>
      <c r="CA56" s="6">
        <v>2205.63415032697</v>
      </c>
      <c r="CB56" s="6">
        <v>2349.88332149858</v>
      </c>
      <c r="CC56" s="6">
        <v>2215.00594473319</v>
      </c>
      <c r="CD56" s="6">
        <v>2189.46998663594</v>
      </c>
      <c r="CE56" s="6">
        <v>2185.64833695949</v>
      </c>
      <c r="CF56" s="6">
        <v>2179.21697040113</v>
      </c>
      <c r="CG56" s="6">
        <v>2171.45566411639</v>
      </c>
      <c r="CH56" s="6">
        <v>2160.79228441524</v>
      </c>
      <c r="CI56" s="6">
        <v>2189.42150238653</v>
      </c>
      <c r="CJ56" s="6">
        <v>2214.50373995664</v>
      </c>
      <c r="CK56" s="6">
        <v>2188.46472463577</v>
      </c>
      <c r="CL56" s="6">
        <v>2214.46352900866</v>
      </c>
      <c r="CM56" s="6">
        <v>2194.94475705078</v>
      </c>
      <c r="CN56" s="6">
        <v>2202.3785703374</v>
      </c>
      <c r="CO56" s="6">
        <v>2199.72882587283</v>
      </c>
      <c r="CP56" s="6">
        <v>2181.10740539829</v>
      </c>
      <c r="CQ56" s="6">
        <v>2203.40883316596</v>
      </c>
      <c r="CR56" s="6">
        <v>2159.30178479878</v>
      </c>
      <c r="CS56" s="6">
        <v>2173.94961843138</v>
      </c>
      <c r="CT56" s="6">
        <v>2177.69358597108</v>
      </c>
    </row>
    <row r="57" spans="2:98" ht="15" customHeight="true">
      <c r="B57" s="6">
        <v>92.5</v>
      </c>
      <c r="C57" s="6">
        <v>2183.54934069728</v>
      </c>
      <c r="D57" s="6">
        <v>2218.93745902221</v>
      </c>
      <c r="E57" s="6">
        <v>2211.69939526917</v>
      </c>
      <c r="F57" s="6">
        <v>2222.54637410465</v>
      </c>
      <c r="G57" s="6">
        <v>2188.67710305756</v>
      </c>
      <c r="H57" s="6">
        <v>2216.12152484204</v>
      </c>
      <c r="I57" s="6">
        <v>2193.62124333642</v>
      </c>
      <c r="J57" s="6">
        <v>2194.8318579711</v>
      </c>
      <c r="K57" s="6">
        <v>2184.90168628482</v>
      </c>
      <c r="L57" s="6">
        <v>2215.65283646471</v>
      </c>
      <c r="M57" s="6">
        <v>2172.91167007998</v>
      </c>
      <c r="N57" s="6">
        <v>2183.42191234263</v>
      </c>
      <c r="O57" s="6">
        <v>2214.3323939301</v>
      </c>
      <c r="P57" s="6">
        <v>2244.10865457008</v>
      </c>
      <c r="Q57" s="6">
        <v>2219.31219775577</v>
      </c>
      <c r="R57" s="6">
        <v>2206.8662821433</v>
      </c>
      <c r="S57" s="6">
        <v>2189.97718855481</v>
      </c>
      <c r="T57" s="6">
        <v>2206.21340810585</v>
      </c>
      <c r="U57" s="6">
        <v>2214.58491969557</v>
      </c>
      <c r="V57" s="6">
        <v>2201.26185619466</v>
      </c>
      <c r="W57" s="6">
        <v>2198.51680412746</v>
      </c>
      <c r="X57" s="6">
        <v>2183.7910639176</v>
      </c>
      <c r="Y57" s="6">
        <v>2181.19729590196</v>
      </c>
      <c r="Z57" s="6">
        <v>2166.95084990585</v>
      </c>
      <c r="AA57" s="6">
        <v>2201.08974502788</v>
      </c>
      <c r="AB57" s="6">
        <v>2210.60175423572</v>
      </c>
      <c r="AC57" s="6">
        <v>2217.58657239505</v>
      </c>
      <c r="AD57" s="6">
        <v>2209.92714412889</v>
      </c>
      <c r="AE57" s="6">
        <v>2186.62752620956</v>
      </c>
      <c r="AF57" s="6">
        <v>2234.84462104168</v>
      </c>
      <c r="AG57" s="6">
        <v>2202.71772442794</v>
      </c>
      <c r="AH57" s="6">
        <v>2199.03859792381</v>
      </c>
      <c r="AI57" s="6">
        <v>2195.25750944948</v>
      </c>
      <c r="AJ57" s="6">
        <v>2186.5790828477</v>
      </c>
      <c r="AK57" s="6">
        <v>2201.98480640563</v>
      </c>
      <c r="AL57" s="6">
        <v>2195.53329047483</v>
      </c>
      <c r="AM57" s="6">
        <v>2191.19765684511</v>
      </c>
      <c r="AN57" s="6">
        <v>2204.02374085643</v>
      </c>
      <c r="AO57" s="6">
        <v>2211.07605445816</v>
      </c>
      <c r="AP57" s="6">
        <v>2224.9123699448</v>
      </c>
      <c r="AQ57" s="6">
        <v>2187.37674286078</v>
      </c>
      <c r="AR57" s="6">
        <v>2213.49760628996</v>
      </c>
      <c r="AS57" s="6">
        <v>2188.16472342001</v>
      </c>
      <c r="AT57" s="6">
        <v>2226.96132035228</v>
      </c>
      <c r="AU57" s="6">
        <v>2203.53036972228</v>
      </c>
      <c r="AV57" s="6">
        <v>2178.0098653714</v>
      </c>
      <c r="AW57" s="6">
        <v>2172.88732376375</v>
      </c>
      <c r="AX57" s="6">
        <v>2208.45754533766</v>
      </c>
      <c r="AY57" s="6">
        <v>2182.85764817258</v>
      </c>
      <c r="AZ57" s="6">
        <v>2186.12372356122</v>
      </c>
      <c r="BA57" s="6">
        <v>2180.73638752513</v>
      </c>
      <c r="BB57" s="6">
        <v>2226.39114667412</v>
      </c>
      <c r="BC57" s="6">
        <v>2206.66388537256</v>
      </c>
      <c r="BD57" s="6">
        <v>2215.88166951871</v>
      </c>
      <c r="BE57" s="6">
        <v>2186.68875621588</v>
      </c>
      <c r="BF57" s="6">
        <v>2220.94271469752</v>
      </c>
      <c r="BG57" s="6">
        <v>2191.19029850724</v>
      </c>
      <c r="BH57" s="6">
        <v>2165.71614820057</v>
      </c>
      <c r="BI57" s="6">
        <v>2182.17764353589</v>
      </c>
      <c r="BJ57" s="6">
        <v>2193.56712079403</v>
      </c>
      <c r="BK57" s="6">
        <v>2169.72824482085</v>
      </c>
      <c r="BL57" s="6">
        <v>2203.458892042</v>
      </c>
      <c r="BM57" s="6">
        <v>2234.11747483701</v>
      </c>
      <c r="BN57" s="6">
        <v>2221.1095606143</v>
      </c>
      <c r="BO57" s="6">
        <v>2213.84719806334</v>
      </c>
      <c r="BP57" s="6">
        <v>2223.4028291237</v>
      </c>
      <c r="BQ57" s="6">
        <v>2212.2969380142</v>
      </c>
      <c r="BR57" s="6">
        <v>2189.17033938212</v>
      </c>
      <c r="BS57" s="6">
        <v>2198.29062699184</v>
      </c>
      <c r="BT57" s="6">
        <v>2176.95127944639</v>
      </c>
      <c r="BU57" s="6">
        <v>2187.91106305844</v>
      </c>
      <c r="BV57" s="6">
        <v>2182.02406615059</v>
      </c>
      <c r="BW57" s="6">
        <v>2190.40660833389</v>
      </c>
      <c r="BX57" s="6">
        <v>2201.24815509784</v>
      </c>
      <c r="BY57" s="6">
        <v>2205.97231560827</v>
      </c>
      <c r="BZ57" s="6">
        <v>2206.93597586204</v>
      </c>
      <c r="CA57" s="6">
        <v>2204.33764123618</v>
      </c>
      <c r="CB57" s="6">
        <v>2348.28522465652</v>
      </c>
      <c r="CC57" s="6">
        <v>2213.72809612001</v>
      </c>
      <c r="CD57" s="6">
        <v>2187.90254667378</v>
      </c>
      <c r="CE57" s="6">
        <v>2185.24005864405</v>
      </c>
      <c r="CF57" s="6">
        <v>2178.71727906588</v>
      </c>
      <c r="CG57" s="6">
        <v>2170.71302053409</v>
      </c>
      <c r="CH57" s="6">
        <v>2160.37790653325</v>
      </c>
      <c r="CI57" s="6">
        <v>2188.78023088217</v>
      </c>
      <c r="CJ57" s="6">
        <v>2213.76934014357</v>
      </c>
      <c r="CK57" s="6">
        <v>2188.04515853404</v>
      </c>
      <c r="CL57" s="6">
        <v>2212.90408134317</v>
      </c>
      <c r="CM57" s="6">
        <v>2193.89496039129</v>
      </c>
      <c r="CN57" s="6">
        <v>2201.64020351564</v>
      </c>
      <c r="CO57" s="6">
        <v>2198.70254609824</v>
      </c>
      <c r="CP57" s="6">
        <v>2180.35753922593</v>
      </c>
      <c r="CQ57" s="6">
        <v>2202.45439793866</v>
      </c>
      <c r="CR57" s="6">
        <v>2158.97480338088</v>
      </c>
      <c r="CS57" s="6">
        <v>2173.26538524319</v>
      </c>
      <c r="CT57" s="6">
        <v>2177.19241104226</v>
      </c>
    </row>
    <row r="58" spans="2:98" ht="15" customHeight="true">
      <c r="B58" s="6">
        <v>93</v>
      </c>
      <c r="C58" s="6">
        <v>2182.69634636809</v>
      </c>
      <c r="D58" s="6">
        <v>2218.18847929595</v>
      </c>
      <c r="E58" s="6">
        <v>2210.7286551915</v>
      </c>
      <c r="F58" s="6">
        <v>2221.85204456235</v>
      </c>
      <c r="G58" s="6">
        <v>2188.31106656235</v>
      </c>
      <c r="H58" s="6">
        <v>2215.33905945086</v>
      </c>
      <c r="I58" s="6">
        <v>2193.06587143162</v>
      </c>
      <c r="J58" s="6">
        <v>2194.13825017443</v>
      </c>
      <c r="K58" s="6">
        <v>2184.37605967172</v>
      </c>
      <c r="L58" s="6">
        <v>2215.02844096564</v>
      </c>
      <c r="M58" s="6">
        <v>2172.79968782895</v>
      </c>
      <c r="N58" s="6">
        <v>2183.22463432058</v>
      </c>
      <c r="O58" s="6">
        <v>2213.48624118361</v>
      </c>
      <c r="P58" s="6">
        <v>2242.86333495806</v>
      </c>
      <c r="Q58" s="6">
        <v>2218.76883418077</v>
      </c>
      <c r="R58" s="6">
        <v>2206.58875505026</v>
      </c>
      <c r="S58" s="6">
        <v>2189.93799930596</v>
      </c>
      <c r="T58" s="6">
        <v>2205.31059819583</v>
      </c>
      <c r="U58" s="6">
        <v>2214.35442087359</v>
      </c>
      <c r="V58" s="6">
        <v>2200.73592127333</v>
      </c>
      <c r="W58" s="6">
        <v>2198.47963910743</v>
      </c>
      <c r="X58" s="6">
        <v>2183.2596926543</v>
      </c>
      <c r="Y58" s="6">
        <v>2180.84978809097</v>
      </c>
      <c r="Z58" s="6">
        <v>2166.17973634507</v>
      </c>
      <c r="AA58" s="6">
        <v>2200.20213105242</v>
      </c>
      <c r="AB58" s="6">
        <v>2209.24160344154</v>
      </c>
      <c r="AC58" s="6">
        <v>2216.93218632491</v>
      </c>
      <c r="AD58" s="6">
        <v>2209.36178899693</v>
      </c>
      <c r="AE58" s="6">
        <v>2185.88401389061</v>
      </c>
      <c r="AF58" s="6">
        <v>2233.9652315985</v>
      </c>
      <c r="AG58" s="6">
        <v>2201.51323804274</v>
      </c>
      <c r="AH58" s="6">
        <v>2197.84546743771</v>
      </c>
      <c r="AI58" s="6">
        <v>2194.88768977584</v>
      </c>
      <c r="AJ58" s="6">
        <v>2186.23603061096</v>
      </c>
      <c r="AK58" s="6">
        <v>2201.41299495895</v>
      </c>
      <c r="AL58" s="6">
        <v>2195.00694076132</v>
      </c>
      <c r="AM58" s="6">
        <v>2190.63726986709</v>
      </c>
      <c r="AN58" s="6">
        <v>2203.08872439526</v>
      </c>
      <c r="AO58" s="6">
        <v>2210.00235952913</v>
      </c>
      <c r="AP58" s="6">
        <v>2224.13701836165</v>
      </c>
      <c r="AQ58" s="6">
        <v>2186.86650042191</v>
      </c>
      <c r="AR58" s="6">
        <v>2212.48051016611</v>
      </c>
      <c r="AS58" s="6">
        <v>2187.64446936939</v>
      </c>
      <c r="AT58" s="6">
        <v>2226.46022399318</v>
      </c>
      <c r="AU58" s="6">
        <v>2203.26309958817</v>
      </c>
      <c r="AV58" s="6">
        <v>2178.13483459894</v>
      </c>
      <c r="AW58" s="6">
        <v>2172.07200713623</v>
      </c>
      <c r="AX58" s="6">
        <v>2207.74858683163</v>
      </c>
      <c r="AY58" s="6">
        <v>2181.60745858606</v>
      </c>
      <c r="AZ58" s="6">
        <v>2185.73328108968</v>
      </c>
      <c r="BA58" s="6">
        <v>2180.17705030827</v>
      </c>
      <c r="BB58" s="6">
        <v>2225.48266288757</v>
      </c>
      <c r="BC58" s="6">
        <v>2205.76725742927</v>
      </c>
      <c r="BD58" s="6">
        <v>2214.67799217723</v>
      </c>
      <c r="BE58" s="6">
        <v>2185.81134792858</v>
      </c>
      <c r="BF58" s="6">
        <v>2219.90629547285</v>
      </c>
      <c r="BG58" s="6">
        <v>2190.75069181208</v>
      </c>
      <c r="BH58" s="6">
        <v>2165.57668720624</v>
      </c>
      <c r="BI58" s="6">
        <v>2181.80239278252</v>
      </c>
      <c r="BJ58" s="6">
        <v>2193.39960200741</v>
      </c>
      <c r="BK58" s="6">
        <v>2169.48414523738</v>
      </c>
      <c r="BL58" s="6">
        <v>2202.81118871381</v>
      </c>
      <c r="BM58" s="6">
        <v>2233.63553654867</v>
      </c>
      <c r="BN58" s="6">
        <v>2220.42593847905</v>
      </c>
      <c r="BO58" s="6">
        <v>2213.17125698565</v>
      </c>
      <c r="BP58" s="6">
        <v>2222.02637828322</v>
      </c>
      <c r="BQ58" s="6">
        <v>2211.57435454535</v>
      </c>
      <c r="BR58" s="6">
        <v>2188.62683437199</v>
      </c>
      <c r="BS58" s="6">
        <v>2197.16801035098</v>
      </c>
      <c r="BT58" s="6">
        <v>2176.56582316518</v>
      </c>
      <c r="BU58" s="6">
        <v>2187.96582951955</v>
      </c>
      <c r="BV58" s="6">
        <v>2181.70356531589</v>
      </c>
      <c r="BW58" s="6">
        <v>2189.60782584519</v>
      </c>
      <c r="BX58" s="6">
        <v>2200.0273867116</v>
      </c>
      <c r="BY58" s="6">
        <v>2204.70679082714</v>
      </c>
      <c r="BZ58" s="6">
        <v>2206.03381172502</v>
      </c>
      <c r="CA58" s="6">
        <v>2202.91532288632</v>
      </c>
      <c r="CB58" s="6">
        <v>2346.80421574572</v>
      </c>
      <c r="CC58" s="6">
        <v>2212.76906713546</v>
      </c>
      <c r="CD58" s="6">
        <v>2186.61045987684</v>
      </c>
      <c r="CE58" s="6">
        <v>2184.98773394744</v>
      </c>
      <c r="CF58" s="6">
        <v>2177.83033557613</v>
      </c>
      <c r="CG58" s="6">
        <v>2170.32570670739</v>
      </c>
      <c r="CH58" s="6">
        <v>2160.02034309263</v>
      </c>
      <c r="CI58" s="6">
        <v>2187.83703061859</v>
      </c>
      <c r="CJ58" s="6">
        <v>2212.92545433415</v>
      </c>
      <c r="CK58" s="6">
        <v>2187.53165039768</v>
      </c>
      <c r="CL58" s="6">
        <v>2211.40672143727</v>
      </c>
      <c r="CM58" s="6">
        <v>2192.78528231225</v>
      </c>
      <c r="CN58" s="6">
        <v>2201.28467367664</v>
      </c>
      <c r="CO58" s="6">
        <v>2198.05887543823</v>
      </c>
      <c r="CP58" s="6">
        <v>2179.97384192337</v>
      </c>
      <c r="CQ58" s="6">
        <v>2201.5331366195</v>
      </c>
      <c r="CR58" s="6">
        <v>2158.97493315708</v>
      </c>
      <c r="CS58" s="6">
        <v>2172.93164698503</v>
      </c>
      <c r="CT58" s="6">
        <v>2176.61311761182</v>
      </c>
    </row>
    <row r="59" spans="2:98" ht="15" customHeight="true">
      <c r="B59" s="6">
        <v>93.5</v>
      </c>
      <c r="C59" s="6">
        <v>2182.38745121487</v>
      </c>
      <c r="D59" s="6">
        <v>2218.29771793851</v>
      </c>
      <c r="E59" s="6">
        <v>2210.21964298119</v>
      </c>
      <c r="F59" s="6">
        <v>2221.68061536865</v>
      </c>
      <c r="G59" s="6">
        <v>2188.01185064181</v>
      </c>
      <c r="H59" s="6">
        <v>2214.68605566429</v>
      </c>
      <c r="I59" s="6">
        <v>2192.64438872094</v>
      </c>
      <c r="J59" s="6">
        <v>2194.0096043098</v>
      </c>
      <c r="K59" s="6">
        <v>2183.81867201241</v>
      </c>
      <c r="L59" s="6">
        <v>2214.71107222537</v>
      </c>
      <c r="M59" s="6">
        <v>2172.85857086781</v>
      </c>
      <c r="N59" s="6">
        <v>2183.06913196836</v>
      </c>
      <c r="O59" s="6">
        <v>2213.03326972699</v>
      </c>
      <c r="P59" s="6">
        <v>2241.92390135406</v>
      </c>
      <c r="Q59" s="6">
        <v>2218.51914726082</v>
      </c>
      <c r="R59" s="6">
        <v>2206.4310153761</v>
      </c>
      <c r="S59" s="6">
        <v>2190.30265190404</v>
      </c>
      <c r="T59" s="6">
        <v>2204.55294860238</v>
      </c>
      <c r="U59" s="6">
        <v>2213.99481968154</v>
      </c>
      <c r="V59" s="6">
        <v>2200.54594781346</v>
      </c>
      <c r="W59" s="6">
        <v>2198.37576013996</v>
      </c>
      <c r="X59" s="6">
        <v>2182.91605698043</v>
      </c>
      <c r="Y59" s="6">
        <v>2180.35497480713</v>
      </c>
      <c r="Z59" s="6">
        <v>2165.56576752564</v>
      </c>
      <c r="AA59" s="6">
        <v>2199.30471248838</v>
      </c>
      <c r="AB59" s="6">
        <v>2208.49486939406</v>
      </c>
      <c r="AC59" s="6">
        <v>2216.30897335858</v>
      </c>
      <c r="AD59" s="6">
        <v>2208.95889371608</v>
      </c>
      <c r="AE59" s="6">
        <v>2185.47936880283</v>
      </c>
      <c r="AF59" s="6">
        <v>2232.93869472233</v>
      </c>
      <c r="AG59" s="6">
        <v>2200.40562532662</v>
      </c>
      <c r="AH59" s="6">
        <v>2196.69064875109</v>
      </c>
      <c r="AI59" s="6">
        <v>2194.29028633143</v>
      </c>
      <c r="AJ59" s="6">
        <v>2186.46428166665</v>
      </c>
      <c r="AK59" s="6">
        <v>2200.91155214835</v>
      </c>
      <c r="AL59" s="6">
        <v>2194.95011925362</v>
      </c>
      <c r="AM59" s="6">
        <v>2190.48918531063</v>
      </c>
      <c r="AN59" s="6">
        <v>2202.33342007811</v>
      </c>
      <c r="AO59" s="6">
        <v>2209.43446684802</v>
      </c>
      <c r="AP59" s="6">
        <v>2223.23855023349</v>
      </c>
      <c r="AQ59" s="6">
        <v>2186.29936367527</v>
      </c>
      <c r="AR59" s="6">
        <v>2212.11095424386</v>
      </c>
      <c r="AS59" s="6">
        <v>2187.30190380429</v>
      </c>
      <c r="AT59" s="6">
        <v>2225.83655055621</v>
      </c>
      <c r="AU59" s="6">
        <v>2203.28255268768</v>
      </c>
      <c r="AV59" s="6">
        <v>2178.21245579583</v>
      </c>
      <c r="AW59" s="6">
        <v>2171.4330910751</v>
      </c>
      <c r="AX59" s="6">
        <v>2206.94135753045</v>
      </c>
      <c r="AY59" s="6">
        <v>2180.2729812614</v>
      </c>
      <c r="AZ59" s="6">
        <v>2185.31266368538</v>
      </c>
      <c r="BA59" s="6">
        <v>2179.80953074362</v>
      </c>
      <c r="BB59" s="6">
        <v>2224.83673272475</v>
      </c>
      <c r="BC59" s="6">
        <v>2205.27505130676</v>
      </c>
      <c r="BD59" s="6">
        <v>2213.50743900994</v>
      </c>
      <c r="BE59" s="6">
        <v>2185.49995107421</v>
      </c>
      <c r="BF59" s="6">
        <v>2219.18148709778</v>
      </c>
      <c r="BG59" s="6">
        <v>2190.61509576656</v>
      </c>
      <c r="BH59" s="6">
        <v>2165.70550634389</v>
      </c>
      <c r="BI59" s="6">
        <v>2181.28359386165</v>
      </c>
      <c r="BJ59" s="6">
        <v>2193.48367750336</v>
      </c>
      <c r="BK59" s="6">
        <v>2169.52554710529</v>
      </c>
      <c r="BL59" s="6">
        <v>2202.08165866859</v>
      </c>
      <c r="BM59" s="6">
        <v>2232.83921876294</v>
      </c>
      <c r="BN59" s="6">
        <v>2219.71973149134</v>
      </c>
      <c r="BO59" s="6">
        <v>2212.3153526392</v>
      </c>
      <c r="BP59" s="6">
        <v>2220.31902242434</v>
      </c>
      <c r="BQ59" s="6">
        <v>2211.27012979116</v>
      </c>
      <c r="BR59" s="6">
        <v>2188.58702444795</v>
      </c>
      <c r="BS59" s="6">
        <v>2196.29452229325</v>
      </c>
      <c r="BT59" s="6">
        <v>2176.53785673481</v>
      </c>
      <c r="BU59" s="6">
        <v>2188.0744185609</v>
      </c>
      <c r="BV59" s="6">
        <v>2181.59990689829</v>
      </c>
      <c r="BW59" s="6">
        <v>2189.40258299388</v>
      </c>
      <c r="BX59" s="6">
        <v>2199.008838332</v>
      </c>
      <c r="BY59" s="6">
        <v>2203.93208728316</v>
      </c>
      <c r="BZ59" s="6">
        <v>2204.96885006699</v>
      </c>
      <c r="CA59" s="6">
        <v>2201.95694002432</v>
      </c>
      <c r="CB59" s="6">
        <v>2345.58378456525</v>
      </c>
      <c r="CC59" s="6">
        <v>2212.09726905044</v>
      </c>
      <c r="CD59" s="6">
        <v>2185.64321328491</v>
      </c>
      <c r="CE59" s="6">
        <v>2184.76556252087</v>
      </c>
      <c r="CF59" s="6">
        <v>2177.3295699302</v>
      </c>
      <c r="CG59" s="6">
        <v>2170.21503264106</v>
      </c>
      <c r="CH59" s="6">
        <v>2160.10926188593</v>
      </c>
      <c r="CI59" s="6">
        <v>2186.6480405148</v>
      </c>
      <c r="CJ59" s="6">
        <v>2212.09318310393</v>
      </c>
      <c r="CK59" s="6">
        <v>2187.1166626706</v>
      </c>
      <c r="CL59" s="6">
        <v>2210.00526263526</v>
      </c>
      <c r="CM59" s="6">
        <v>2192.45207320473</v>
      </c>
      <c r="CN59" s="6">
        <v>2201.20579545148</v>
      </c>
      <c r="CO59" s="6">
        <v>2197.38902451078</v>
      </c>
      <c r="CP59" s="6">
        <v>2179.79989707968</v>
      </c>
      <c r="CQ59" s="6">
        <v>2201.03005846288</v>
      </c>
      <c r="CR59" s="6">
        <v>2159.29411223176</v>
      </c>
      <c r="CS59" s="6">
        <v>2172.68702844392</v>
      </c>
      <c r="CT59" s="6">
        <v>2176.05808013502</v>
      </c>
    </row>
    <row r="60" spans="2:98" ht="15" customHeight="true">
      <c r="B60" s="6">
        <v>94</v>
      </c>
      <c r="C60" s="6">
        <v>2182.38669549404</v>
      </c>
      <c r="D60" s="6">
        <v>2218.73989525225</v>
      </c>
      <c r="E60" s="6">
        <v>2209.71916051244</v>
      </c>
      <c r="F60" s="6">
        <v>2222.3217129299</v>
      </c>
      <c r="G60" s="6">
        <v>2187.86458702445</v>
      </c>
      <c r="H60" s="6">
        <v>2214.51333281167</v>
      </c>
      <c r="I60" s="6">
        <v>2192.24301196046</v>
      </c>
      <c r="J60" s="6">
        <v>2193.87895822974</v>
      </c>
      <c r="K60" s="6">
        <v>2182.56472320376</v>
      </c>
      <c r="L60" s="6">
        <v>2214.03516782858</v>
      </c>
      <c r="M60" s="6">
        <v>2172.8138272815</v>
      </c>
      <c r="N60" s="6">
        <v>2183.30448972197</v>
      </c>
      <c r="O60" s="6">
        <v>2213.00399533646</v>
      </c>
      <c r="P60" s="6">
        <v>2241.23039687384</v>
      </c>
      <c r="Q60" s="6">
        <v>2217.92034337313</v>
      </c>
      <c r="R60" s="6">
        <v>2205.81452316361</v>
      </c>
      <c r="S60" s="6">
        <v>2190.99875333453</v>
      </c>
      <c r="T60" s="6">
        <v>2204.11269618541</v>
      </c>
      <c r="U60" s="6">
        <v>2213.57244918896</v>
      </c>
      <c r="V60" s="6">
        <v>2199.65141699486</v>
      </c>
      <c r="W60" s="6">
        <v>2198.85720129164</v>
      </c>
      <c r="X60" s="6">
        <v>2182.29842906427</v>
      </c>
      <c r="Y60" s="6">
        <v>2179.70651490426</v>
      </c>
      <c r="Z60" s="6">
        <v>2164.82184415809</v>
      </c>
      <c r="AA60" s="6">
        <v>2198.17510825621</v>
      </c>
      <c r="AB60" s="6">
        <v>2207.25550962862</v>
      </c>
      <c r="AC60" s="6">
        <v>2215.38356297741</v>
      </c>
      <c r="AD60" s="6">
        <v>2208.38031921486</v>
      </c>
      <c r="AE60" s="6">
        <v>2184.55086151629</v>
      </c>
      <c r="AF60" s="6">
        <v>2232.89108020858</v>
      </c>
      <c r="AG60" s="6">
        <v>2199.35107782033</v>
      </c>
      <c r="AH60" s="6">
        <v>2195.66684432731</v>
      </c>
      <c r="AI60" s="6">
        <v>2193.21030595582</v>
      </c>
      <c r="AJ60" s="6">
        <v>2186.83675526792</v>
      </c>
      <c r="AK60" s="6">
        <v>2200.51292071546</v>
      </c>
      <c r="AL60" s="6">
        <v>2195.99744801912</v>
      </c>
      <c r="AM60" s="6">
        <v>2190.13368999297</v>
      </c>
      <c r="AN60" s="6">
        <v>2201.94297390222</v>
      </c>
      <c r="AO60" s="6">
        <v>2208.9336384883</v>
      </c>
      <c r="AP60" s="6">
        <v>2223.2477603023</v>
      </c>
      <c r="AQ60" s="6">
        <v>2185.26633422053</v>
      </c>
      <c r="AR60" s="6">
        <v>2212.09850610155</v>
      </c>
      <c r="AS60" s="6">
        <v>2187.05679585118</v>
      </c>
      <c r="AT60" s="6">
        <v>2225.23537567572</v>
      </c>
      <c r="AU60" s="6">
        <v>2202.87809070397</v>
      </c>
      <c r="AV60" s="6">
        <v>2178.3379644223</v>
      </c>
      <c r="AW60" s="6">
        <v>2170.46410757859</v>
      </c>
      <c r="AX60" s="6">
        <v>2206.64777849531</v>
      </c>
      <c r="AY60" s="6">
        <v>2178.89224750367</v>
      </c>
      <c r="AZ60" s="6">
        <v>2184.65552278832</v>
      </c>
      <c r="BA60" s="6">
        <v>2180.3435509152</v>
      </c>
      <c r="BB60" s="6">
        <v>2224.13826132683</v>
      </c>
      <c r="BC60" s="6">
        <v>2205.61773187911</v>
      </c>
      <c r="BD60" s="6">
        <v>2212.48439387558</v>
      </c>
      <c r="BE60" s="6">
        <v>2185.51167928224</v>
      </c>
      <c r="BF60" s="6">
        <v>2217.80091071843</v>
      </c>
      <c r="BG60" s="6">
        <v>2190.31755713897</v>
      </c>
      <c r="BH60" s="6">
        <v>2165.39747640375</v>
      </c>
      <c r="BI60" s="6">
        <v>2180.40945751927</v>
      </c>
      <c r="BJ60" s="6">
        <v>2194.44123845385</v>
      </c>
      <c r="BK60" s="6">
        <v>2170.07578276953</v>
      </c>
      <c r="BL60" s="6">
        <v>2200.84899451119</v>
      </c>
      <c r="BM60" s="6">
        <v>2232.0046765191</v>
      </c>
      <c r="BN60" s="6">
        <v>2219.07983658235</v>
      </c>
      <c r="BO60" s="6">
        <v>2211.13633873413</v>
      </c>
      <c r="BP60" s="6">
        <v>2218.54885487032</v>
      </c>
      <c r="BQ60" s="6">
        <v>2211.42140771349</v>
      </c>
      <c r="BR60" s="6">
        <v>2188.52109188882</v>
      </c>
      <c r="BS60" s="6">
        <v>2195.66493285002</v>
      </c>
      <c r="BT60" s="6">
        <v>2176.69794036638</v>
      </c>
      <c r="BU60" s="6">
        <v>2187.53679388194</v>
      </c>
      <c r="BV60" s="6">
        <v>2181.96229696966</v>
      </c>
      <c r="BW60" s="6">
        <v>2189.39314475242</v>
      </c>
      <c r="BX60" s="6">
        <v>2197.70353181568</v>
      </c>
      <c r="BY60" s="6">
        <v>2203.50068171277</v>
      </c>
      <c r="BZ60" s="6">
        <v>2204.32413329387</v>
      </c>
      <c r="CA60" s="6">
        <v>2201.28226738685</v>
      </c>
      <c r="CB60" s="6">
        <v>2344.71492351133</v>
      </c>
      <c r="CC60" s="6">
        <v>2210.66833929112</v>
      </c>
      <c r="CD60" s="6">
        <v>2185.60199224396</v>
      </c>
      <c r="CE60" s="6">
        <v>2184.78797676987</v>
      </c>
      <c r="CF60" s="6">
        <v>2176.54980562452</v>
      </c>
      <c r="CG60" s="6">
        <v>2169.75811824027</v>
      </c>
      <c r="CH60" s="6">
        <v>2159.93197947679</v>
      </c>
      <c r="CI60" s="6">
        <v>2184.83554827414</v>
      </c>
      <c r="CJ60" s="6">
        <v>2210.86711044985</v>
      </c>
      <c r="CK60" s="6">
        <v>2186.77723694673</v>
      </c>
      <c r="CL60" s="6">
        <v>2208.31467228453</v>
      </c>
      <c r="CM60" s="6">
        <v>2192.39051859193</v>
      </c>
      <c r="CN60" s="6">
        <v>2201.36594262162</v>
      </c>
      <c r="CO60" s="6">
        <v>2196.51006692504</v>
      </c>
      <c r="CP60" s="6">
        <v>2179.98576906226</v>
      </c>
      <c r="CQ60" s="6">
        <v>2200.80150653012</v>
      </c>
      <c r="CR60" s="6">
        <v>2159.78747177891</v>
      </c>
      <c r="CS60" s="6">
        <v>2173.27345759176</v>
      </c>
      <c r="CT60" s="6">
        <v>2175.34015681829</v>
      </c>
    </row>
    <row r="61" spans="2:98" ht="15" customHeight="true">
      <c r="B61" s="6">
        <v>94.5</v>
      </c>
      <c r="C61" s="6">
        <v>2182.33881096334</v>
      </c>
      <c r="D61" s="6">
        <v>2219.41612543821</v>
      </c>
      <c r="E61" s="6">
        <v>2209.2524421269</v>
      </c>
      <c r="F61" s="6">
        <v>2222.88850822788</v>
      </c>
      <c r="G61" s="6">
        <v>2187.6568849472</v>
      </c>
      <c r="H61" s="6">
        <v>2214.28276881824</v>
      </c>
      <c r="I61" s="6">
        <v>2192.03526910368</v>
      </c>
      <c r="J61" s="6">
        <v>2193.99074173685</v>
      </c>
      <c r="K61" s="6">
        <v>2181.29856964343</v>
      </c>
      <c r="L61" s="6">
        <v>2213.36116679592</v>
      </c>
      <c r="M61" s="6">
        <v>2172.72326881903</v>
      </c>
      <c r="N61" s="6">
        <v>2183.63473307961</v>
      </c>
      <c r="O61" s="6">
        <v>2213.30429522162</v>
      </c>
      <c r="P61" s="6">
        <v>2240.6119448156</v>
      </c>
      <c r="Q61" s="6">
        <v>2217.76629051592</v>
      </c>
      <c r="R61" s="6">
        <v>2205.35826947173</v>
      </c>
      <c r="S61" s="6">
        <v>2192.01195060262</v>
      </c>
      <c r="T61" s="6">
        <v>2203.65626682529</v>
      </c>
      <c r="U61" s="6">
        <v>2212.99076758362</v>
      </c>
      <c r="V61" s="6">
        <v>2199.2056864146</v>
      </c>
      <c r="W61" s="6">
        <v>2199.39371757711</v>
      </c>
      <c r="X61" s="6">
        <v>2181.87180575746</v>
      </c>
      <c r="Y61" s="6">
        <v>2179.19283476133</v>
      </c>
      <c r="Z61" s="6">
        <v>2163.87528412565</v>
      </c>
      <c r="AA61" s="6">
        <v>2197.15195677812</v>
      </c>
      <c r="AB61" s="6">
        <v>2206.00305240883</v>
      </c>
      <c r="AC61" s="6">
        <v>2214.60043794419</v>
      </c>
      <c r="AD61" s="6">
        <v>2208.01453796517</v>
      </c>
      <c r="AE61" s="6">
        <v>2183.6066833985</v>
      </c>
      <c r="AF61" s="6">
        <v>2232.74488914587</v>
      </c>
      <c r="AG61" s="6">
        <v>2198.16529228274</v>
      </c>
      <c r="AH61" s="6">
        <v>2194.47956494203</v>
      </c>
      <c r="AI61" s="6">
        <v>2192.29578295015</v>
      </c>
      <c r="AJ61" s="6">
        <v>2187.37411326386</v>
      </c>
      <c r="AK61" s="6">
        <v>2200.19688861422</v>
      </c>
      <c r="AL61" s="6">
        <v>2197.00014852663</v>
      </c>
      <c r="AM61" s="6">
        <v>2190.06027093942</v>
      </c>
      <c r="AN61" s="6">
        <v>2201.70611033038</v>
      </c>
      <c r="AO61" s="6">
        <v>2208.31970533336</v>
      </c>
      <c r="AP61" s="6">
        <v>2223.16006351798</v>
      </c>
      <c r="AQ61" s="6">
        <v>2184.16309517747</v>
      </c>
      <c r="AR61" s="6">
        <v>2212.47330146325</v>
      </c>
      <c r="AS61" s="6">
        <v>2187.14631829939</v>
      </c>
      <c r="AT61" s="6">
        <v>2224.88203908582</v>
      </c>
      <c r="AU61" s="6">
        <v>2202.65772808515</v>
      </c>
      <c r="AV61" s="6">
        <v>2178.39143977464</v>
      </c>
      <c r="AW61" s="6">
        <v>2169.74735938563</v>
      </c>
      <c r="AX61" s="6">
        <v>2206.50212093764</v>
      </c>
      <c r="AY61" s="6">
        <v>2177.48623144931</v>
      </c>
      <c r="AZ61" s="6">
        <v>2184.18384752206</v>
      </c>
      <c r="BA61" s="6">
        <v>2180.99493391365</v>
      </c>
[truncated: 9,992 more chars]
