# Supplementary material for: PLA2G16 expression predicts prognosis and gemcitabine sensitivity in patients with pancreatic cancer
Source: PeerJ journal article supplement (doi:10.7717/peerj.19517), 2025-05-30
Supplement: FIG3B3I.zip [file admin_2023-08-31 11-19-35_CT052869 - Melt Curve Summary.xlsx › xl/worksheets/sheet1.xml]

<?xml version="1.0"?>
<worksheet xmlns:xsi="http://www.w3.org/2001/XMLSchema-instance" xmlns:xsd="http://www.w3.org/2001/XMLSchema" xmlns="http://schemas.openxmlformats.org/spreadsheetml/2006/main">
  <sheetPr>
    <pageSetUpPr />
  </sheetPr>
  <dimension ref="A1:G102" />
  <sheetViews>
    <sheetView tabSelected="true" workbookViewId="0">
      <pane xSplit="1" ySplit="1" topLeftCell="B2" state="frozen" />
      <selection pane="bottomRight" activeCell="B2" sqref="B2:B2" />
      <selection pane="topRight" activeCell="B2" sqref="B2:B2" />
      <selection pane="bottomLeft" activeCell="B2" sqref="B2:B2" />
      <selection activeCell="B2" sqref="B2:B2" />
    </sheetView>
  </sheetViews>
  <sheetFormatPr defaultColWidth="10" defaultRowHeight="15" customHeight="true" />
  <cols>
    <col min="1" max="1" width="1.5" style="4" customWidth="true" />
    <col min="2" max="2" width="8.33" style="11" customWidth="true" />
    <col min="3" max="3" width="10" style="12" customWidth="true" />
    <col min="4" max="4" width="10" style="13" customWidth="true" />
    <col min="5" max="6" width="11.67" style="13" customWidth="true" />
    <col min="7" max="7" width="8.33" style="14" customWidth="true" />
    <col min="8" max="16384" width="10" style="1" customWidth="true" />
  </cols>
  <sheetData>
    <row r="1" spans="1:7" s="2" customFormat="true" ht="24" customHeight="true">
      <c r="A1" s="5" />
      <c r="B1" s="3" t="s">
        <v>0</v>
      </c>
      <c r="C1" s="3" t="s">
        <v>1</v>
      </c>
      <c r="D1" s="3" t="s">
        <v>2</v>
      </c>
      <c r="E1" s="3" t="s">
        <v>3</v>
      </c>
      <c r="F1" s="3" t="s">
        <v>4</v>
      </c>
      <c r="G1" s="3" t="s">
        <v>5</v>
      </c>
    </row>
    <row r="2" spans="1:7" ht="15" hidden="true" customHeight="true">
      <c r="A2" s="4" />
      <c r="B2" s="7" t="s">
        <v>6</v>
      </c>
      <c r="C2" s="8" t="s">
        <v>7</v>
      </c>
      <c r="D2" s="9" t="s">
        <v>8</v>
      </c>
      <c r="E2" s="9" t="s">
        <v>9</v>
      </c>
      <c r="F2" s="9" t="s">
        <v>8</v>
      </c>
      <c r="G2" s="10">
        <v>82.5</v>
      </c>
    </row>
    <row r="3" spans="1:7" s="6" customFormat="true" ht="15" hidden="true" customHeight="true">
      <c r="A3" s="4" />
      <c r="B3" s="7" t="s">
        <v>6</v>
      </c>
      <c r="C3" s="8" t="s">
        <v>7</v>
      </c>
      <c r="D3" s="9" t="s">
        <v>8</v>
      </c>
      <c r="E3" s="9" t="s">
        <v>9</v>
      </c>
      <c r="F3" s="9" t="s">
        <v>8</v>
      </c>
      <c r="G3" s="10">
        <v>86</v>
      </c>
    </row>
    <row r="4" spans="1:7" s="6" customFormat="true" ht="15" hidden="true" customHeight="true">
      <c r="A4" s="4" />
      <c r="B4" s="7" t="s">
        <v>10</v>
      </c>
      <c r="C4" s="8" t="s">
        <v>7</v>
      </c>
      <c r="D4" s="9" t="s">
        <v>8</v>
      </c>
      <c r="E4" s="9" t="s">
        <v>9</v>
      </c>
      <c r="F4" s="9" t="s">
        <v>8</v>
      </c>
      <c r="G4" s="10">
        <v>86</v>
      </c>
    </row>
    <row r="5" spans="1:7" s="6" customFormat="true" ht="15" hidden="true" customHeight="true">
      <c r="A5" s="4" />
      <c r="B5" s="7" t="s">
        <v>11</v>
      </c>
      <c r="C5" s="8" t="s">
        <v>7</v>
      </c>
      <c r="D5" s="9" t="s">
        <v>8</v>
      </c>
      <c r="E5" s="9" t="s">
        <v>9</v>
      </c>
      <c r="F5" s="9" t="s">
        <v>8</v>
      </c>
      <c r="G5" s="10">
        <v>82.5</v>
      </c>
    </row>
    <row r="6" spans="1:7" s="6" customFormat="true" ht="15" hidden="true" customHeight="true">
      <c r="A6" s="4" />
      <c r="B6" s="7" t="s">
        <v>12</v>
      </c>
      <c r="C6" s="8" t="s">
        <v>7</v>
      </c>
      <c r="D6" s="9" t="s">
        <v>8</v>
      </c>
      <c r="E6" s="9" t="s">
        <v>9</v>
      </c>
      <c r="F6" s="9" t="s">
        <v>8</v>
      </c>
      <c r="G6" s="10">
        <v>82.5</v>
      </c>
    </row>
    <row r="7" spans="1:7" s="6" customFormat="true" ht="15" hidden="true" customHeight="true">
      <c r="A7" s="4" />
      <c r="B7" s="7" t="s">
        <v>13</v>
      </c>
      <c r="C7" s="8" t="s">
        <v>7</v>
      </c>
      <c r="D7" s="9" t="s">
        <v>8</v>
      </c>
      <c r="E7" s="9" t="s">
        <v>9</v>
      </c>
      <c r="F7" s="9" t="s">
        <v>8</v>
      </c>
      <c r="G7" s="10">
        <v>82.5</v>
      </c>
    </row>
    <row r="8" spans="1:7" s="6" customFormat="true" ht="15" hidden="true" customHeight="true">
      <c r="A8" s="4" />
      <c r="B8" s="7" t="s">
        <v>14</v>
      </c>
      <c r="C8" s="8" t="s">
        <v>7</v>
      </c>
      <c r="D8" s="9" t="s">
        <v>8</v>
      </c>
      <c r="E8" s="9" t="s">
        <v>9</v>
      </c>
      <c r="F8" s="9" t="s">
        <v>8</v>
      </c>
      <c r="G8" s="10">
        <v>82.5</v>
      </c>
    </row>
    <row r="9" spans="1:7" s="6" customFormat="true" ht="15" hidden="true" customHeight="true">
      <c r="A9" s="4" />
      <c r="B9" s="7" t="s">
        <v>15</v>
      </c>
      <c r="C9" s="8" t="s">
        <v>7</v>
      </c>
      <c r="D9" s="9" t="s">
        <v>8</v>
      </c>
      <c r="E9" s="9" t="s">
        <v>9</v>
      </c>
      <c r="F9" s="9" t="s">
        <v>8</v>
      </c>
      <c r="G9" s="10">
        <v>82.5</v>
      </c>
    </row>
    <row r="10" spans="1:7" s="6" customFormat="true" ht="15" hidden="true" customHeight="true">
      <c r="A10" s="4" />
      <c r="B10" s="7" t="s">
        <v>16</v>
      </c>
      <c r="C10" s="8" t="s">
        <v>7</v>
      </c>
      <c r="D10" s="9" t="s">
        <v>8</v>
      </c>
      <c r="E10" s="9" t="s">
        <v>9</v>
      </c>
      <c r="F10" s="9" t="s">
        <v>8</v>
      </c>
      <c r="G10" s="10">
        <v>82.5</v>
      </c>
    </row>
    <row r="11" spans="1:7" s="6" customFormat="true" ht="15" hidden="true" customHeight="true">
      <c r="A11" s="4" />
      <c r="B11" s="7" t="s">
        <v>17</v>
      </c>
      <c r="C11" s="8" t="s">
        <v>7</v>
      </c>
      <c r="D11" s="9" t="s">
        <v>8</v>
      </c>
      <c r="E11" s="9" t="s">
        <v>9</v>
      </c>
      <c r="F11" s="9" t="s">
        <v>8</v>
      </c>
      <c r="G11" s="10">
        <v>82.5</v>
      </c>
    </row>
    <row r="12" spans="1:7" s="6" customFormat="true" ht="15" customHeight="true">
      <c r="A12" s="4" />
      <c r="B12" s="7" t="s">
        <v>18</v>
      </c>
      <c r="C12" s="8" t="s">
        <v>7</v>
      </c>
      <c r="D12" s="9" t="s">
        <v>8</v>
      </c>
      <c r="E12" s="9" t="s">
        <v>9</v>
      </c>
      <c r="F12" s="9" t="s">
        <v>8</v>
      </c>
      <c r="G12" s="10" t="s">
        <v>19</v>
      </c>
    </row>
    <row r="13" spans="2:7" ht="15" customHeight="true">
      <c r="B13" s="11" t="s">
        <v>20</v>
      </c>
      <c r="C13" s="12" t="s">
        <v>7</v>
      </c>
      <c r="D13" s="13" t="s">
        <v>8</v>
      </c>
      <c r="E13" s="13" t="s">
        <v>9</v>
      </c>
      <c r="F13" s="13" t="s">
        <v>8</v>
      </c>
      <c r="G13" s="14" t="s">
        <v>19</v>
      </c>
    </row>
    <row r="14" spans="1:7" s="6" customFormat="true" ht="15" customHeight="true">
      <c r="A14" s="4" />
      <c r="B14" s="7" t="s">
        <v>21</v>
      </c>
      <c r="C14" s="8" t="s">
        <v>7</v>
      </c>
      <c r="D14" s="9" t="s">
        <v>8</v>
      </c>
      <c r="E14" s="9" t="s">
        <v>9</v>
      </c>
      <c r="F14" s="9" t="s">
        <v>8</v>
      </c>
      <c r="G14" s="10" t="s">
        <v>19</v>
      </c>
    </row>
    <row r="15" spans="1:7" s="6" customFormat="true" ht="15" hidden="true" customHeight="true">
      <c r="A15" s="4" />
      <c r="B15" s="7" t="s">
        <v>22</v>
      </c>
      <c r="C15" s="8" t="s">
        <v>7</v>
      </c>
      <c r="D15" s="9" t="s">
        <v>8</v>
      </c>
      <c r="E15" s="9" t="s">
        <v>9</v>
      </c>
      <c r="F15" s="9" t="s">
        <v>8</v>
      </c>
      <c r="G15" s="10">
        <v>86.5</v>
      </c>
    </row>
    <row r="16" spans="1:7" ht="15" hidden="true" customHeight="true">
      <c r="A16" s="4" />
      <c r="B16" s="7" t="s">
        <v>23</v>
      </c>
      <c r="C16" s="8" t="s">
        <v>7</v>
      </c>
      <c r="D16" s="9" t="s">
        <v>8</v>
      </c>
      <c r="E16" s="9" t="s">
        <v>9</v>
      </c>
      <c r="F16" s="9" t="s">
        <v>8</v>
      </c>
      <c r="G16" s="10">
        <v>82.5</v>
      </c>
    </row>
    <row r="17" spans="1:7" s="6" customFormat="true" ht="15" hidden="true" customHeight="true">
      <c r="A17" s="4" />
      <c r="B17" s="7" t="s">
        <v>23</v>
      </c>
      <c r="C17" s="8" t="s">
        <v>7</v>
      </c>
      <c r="D17" s="9" t="s">
        <v>8</v>
      </c>
      <c r="E17" s="9" t="s">
        <v>9</v>
      </c>
      <c r="F17" s="9" t="s">
        <v>8</v>
      </c>
      <c r="G17" s="10">
        <v>86</v>
      </c>
    </row>
    <row r="18" spans="1:7" s="6" customFormat="true" ht="15" hidden="true" customHeight="true">
      <c r="A18" s="4" />
      <c r="B18" s="7" t="s">
        <v>24</v>
      </c>
      <c r="C18" s="8" t="s">
        <v>7</v>
      </c>
      <c r="D18" s="9" t="s">
        <v>8</v>
      </c>
      <c r="E18" s="9" t="s">
        <v>9</v>
      </c>
      <c r="F18" s="9" t="s">
        <v>8</v>
      </c>
      <c r="G18" s="10">
        <v>82.5</v>
      </c>
    </row>
    <row r="19" spans="1:7" s="6" customFormat="true" ht="15" hidden="true" customHeight="true">
      <c r="A19" s="4" />
      <c r="B19" s="7" t="s">
        <v>25</v>
      </c>
      <c r="C19" s="8" t="s">
        <v>7</v>
      </c>
      <c r="D19" s="9" t="s">
        <v>8</v>
      </c>
      <c r="E19" s="9" t="s">
        <v>9</v>
      </c>
      <c r="F19" s="9" t="s">
        <v>8</v>
      </c>
      <c r="G19" s="10">
        <v>82.5</v>
      </c>
    </row>
    <row r="20" spans="1:7" s="6" customFormat="true" ht="15" hidden="true" customHeight="true">
      <c r="A20" s="4" />
      <c r="B20" s="7" t="s">
        <v>26</v>
      </c>
      <c r="C20" s="8" t="s">
        <v>7</v>
      </c>
      <c r="D20" s="9" t="s">
        <v>8</v>
      </c>
      <c r="E20" s="9" t="s">
        <v>9</v>
      </c>
      <c r="F20" s="9" t="s">
        <v>8</v>
      </c>
      <c r="G20" s="10">
        <v>82.5</v>
      </c>
    </row>
    <row r="21" spans="1:7" s="6" customFormat="true" ht="15" hidden="true" customHeight="true">
      <c r="A21" s="4" />
      <c r="B21" s="7" t="s">
        <v>27</v>
      </c>
      <c r="C21" s="8" t="s">
        <v>7</v>
      </c>
      <c r="D21" s="9" t="s">
        <v>8</v>
      </c>
      <c r="E21" s="9" t="s">
        <v>9</v>
      </c>
      <c r="F21" s="9" t="s">
        <v>8</v>
      </c>
      <c r="G21" s="10">
        <v>82.5</v>
      </c>
    </row>
    <row r="22" spans="1:7" s="6" customFormat="true" ht="15" hidden="true" customHeight="true">
      <c r="A22" s="4" />
      <c r="B22" s="7" t="s">
        <v>28</v>
      </c>
      <c r="C22" s="8" t="s">
        <v>7</v>
      </c>
      <c r="D22" s="9" t="s">
        <v>8</v>
      </c>
      <c r="E22" s="9" t="s">
        <v>9</v>
      </c>
      <c r="F22" s="9" t="s">
        <v>8</v>
      </c>
      <c r="G22" s="10">
        <v>82.5</v>
      </c>
    </row>
    <row r="23" spans="1:7" s="6" customFormat="true" ht="15" hidden="true" customHeight="true">
      <c r="A23" s="4" />
      <c r="B23" s="7" t="s">
        <v>29</v>
      </c>
      <c r="C23" s="8" t="s">
        <v>7</v>
      </c>
      <c r="D23" s="9" t="s">
        <v>8</v>
      </c>
      <c r="E23" s="9" t="s">
        <v>9</v>
      </c>
      <c r="F23" s="9" t="s">
        <v>8</v>
      </c>
      <c r="G23" s="10">
        <v>82.5</v>
      </c>
    </row>
    <row r="24" spans="1:7" s="6" customFormat="true" ht="15" hidden="true" customHeight="true">
      <c r="A24" s="4" />
      <c r="B24" s="7" t="s">
        <v>30</v>
      </c>
      <c r="C24" s="8" t="s">
        <v>7</v>
      </c>
      <c r="D24" s="9" t="s">
        <v>8</v>
      </c>
      <c r="E24" s="9" t="s">
        <v>9</v>
      </c>
      <c r="F24" s="9" t="s">
        <v>8</v>
      </c>
      <c r="G24" s="10">
        <v>82.5</v>
      </c>
    </row>
    <row r="25" spans="2:7" ht="15" customHeight="true">
      <c r="B25" s="11" t="s">
        <v>31</v>
      </c>
      <c r="C25" s="12" t="s">
        <v>7</v>
      </c>
      <c r="D25" s="13" t="s">
        <v>8</v>
      </c>
      <c r="E25" s="13" t="s">
        <v>9</v>
      </c>
      <c r="F25" s="13" t="s">
        <v>8</v>
      </c>
      <c r="G25" s="14" t="s">
        <v>19</v>
      </c>
    </row>
    <row r="26" spans="1:7" s="6" customFormat="true" ht="15" customHeight="true">
      <c r="A26" s="4" />
      <c r="B26" s="7" t="s">
        <v>32</v>
      </c>
      <c r="C26" s="8" t="s">
        <v>7</v>
      </c>
      <c r="D26" s="9" t="s">
        <v>8</v>
      </c>
      <c r="E26" s="9" t="s">
        <v>9</v>
      </c>
      <c r="F26" s="9" t="s">
        <v>8</v>
      </c>
      <c r="G26" s="10" t="s">
        <v>19</v>
      </c>
    </row>
    <row r="27" spans="1:7" s="6" customFormat="true" ht="15" customHeight="true">
      <c r="A27" s="4" />
      <c r="B27" s="7" t="s">
        <v>33</v>
      </c>
      <c r="C27" s="8" t="s">
        <v>7</v>
      </c>
      <c r="D27" s="9" t="s">
        <v>8</v>
      </c>
      <c r="E27" s="9" t="s">
        <v>9</v>
      </c>
      <c r="F27" s="9" t="s">
        <v>8</v>
      </c>
      <c r="G27" s="10" t="s">
        <v>19</v>
      </c>
    </row>
    <row r="28" spans="1:7" ht="15" hidden="true" customHeight="true">
      <c r="A28" s="4" />
      <c r="B28" s="7" t="s">
        <v>34</v>
      </c>
      <c r="C28" s="8" t="s">
        <v>7</v>
      </c>
      <c r="D28" s="9" t="s">
        <v>8</v>
      </c>
      <c r="E28" s="9" t="s">
        <v>9</v>
      </c>
      <c r="F28" s="9" t="s">
        <v>8</v>
      </c>
      <c r="G28" s="10">
        <v>82.5</v>
      </c>
    </row>
    <row r="29" spans="1:7" s="6" customFormat="true" ht="15" hidden="true" customHeight="true">
      <c r="A29" s="4" />
      <c r="B29" s="7" t="s">
        <v>34</v>
      </c>
      <c r="C29" s="8" t="s">
        <v>7</v>
      </c>
      <c r="D29" s="9" t="s">
        <v>8</v>
      </c>
      <c r="E29" s="9" t="s">
        <v>9</v>
      </c>
      <c r="F29" s="9" t="s">
        <v>8</v>
      </c>
      <c r="G29" s="10">
        <v>86.5</v>
      </c>
    </row>
    <row r="30" spans="1:7" ht="15" hidden="true" customHeight="true">
      <c r="A30" s="4" />
      <c r="B30" s="7" t="s">
        <v>35</v>
      </c>
      <c r="C30" s="8" t="s">
        <v>7</v>
      </c>
      <c r="D30" s="9" t="s">
        <v>8</v>
      </c>
      <c r="E30" s="9" t="s">
        <v>9</v>
      </c>
      <c r="F30" s="9" t="s">
        <v>8</v>
      </c>
      <c r="G30" s="10">
        <v>82.5</v>
      </c>
    </row>
    <row r="31" spans="1:7" s="6" customFormat="true" ht="15" hidden="true" customHeight="true">
      <c r="A31" s="4" />
      <c r="B31" s="7" t="s">
        <v>35</v>
      </c>
      <c r="C31" s="8" t="s">
        <v>7</v>
      </c>
      <c r="D31" s="9" t="s">
        <v>8</v>
      </c>
      <c r="E31" s="9" t="s">
        <v>9</v>
      </c>
      <c r="F31" s="9" t="s">
        <v>8</v>
      </c>
      <c r="G31" s="10">
        <v>86</v>
      </c>
    </row>
    <row r="32" spans="1:7" s="6" customFormat="true" ht="15" hidden="true" customHeight="true">
      <c r="A32" s="4" />
      <c r="B32" s="7" t="s">
        <v>36</v>
      </c>
      <c r="C32" s="8" t="s">
        <v>7</v>
      </c>
      <c r="D32" s="9" t="s">
        <v>8</v>
      </c>
      <c r="E32" s="9" t="s">
        <v>9</v>
      </c>
      <c r="F32" s="9" t="s">
        <v>8</v>
      </c>
      <c r="G32" s="10">
        <v>82.5</v>
      </c>
    </row>
    <row r="33" spans="1:7" s="6" customFormat="true" ht="15" hidden="true" customHeight="true">
      <c r="A33" s="4" />
      <c r="B33" s="7" t="s">
        <v>37</v>
      </c>
      <c r="C33" s="8" t="s">
        <v>7</v>
      </c>
      <c r="D33" s="9" t="s">
        <v>8</v>
      </c>
      <c r="E33" s="9" t="s">
        <v>9</v>
      </c>
      <c r="F33" s="9" t="s">
        <v>8</v>
      </c>
      <c r="G33" s="10">
        <v>82.5</v>
      </c>
    </row>
    <row r="34" spans="1:7" s="6" customFormat="true" ht="15" hidden="true" customHeight="true">
      <c r="A34" s="4" />
      <c r="B34" s="7" t="s">
        <v>38</v>
      </c>
      <c r="C34" s="8" t="s">
        <v>7</v>
      </c>
      <c r="D34" s="9" t="s">
        <v>8</v>
      </c>
      <c r="E34" s="9" t="s">
        <v>9</v>
      </c>
      <c r="F34" s="9" t="s">
        <v>8</v>
      </c>
      <c r="G34" s="10">
        <v>82.5</v>
      </c>
    </row>
    <row r="35" spans="1:7" s="6" customFormat="true" ht="15" hidden="true" customHeight="true">
      <c r="A35" s="4" />
      <c r="B35" s="7" t="s">
        <v>39</v>
      </c>
      <c r="C35" s="8" t="s">
        <v>7</v>
      </c>
      <c r="D35" s="9" t="s">
        <v>8</v>
      </c>
      <c r="E35" s="9" t="s">
        <v>9</v>
      </c>
      <c r="F35" s="9" t="s">
        <v>8</v>
      </c>
      <c r="G35" s="10">
        <v>82.5</v>
      </c>
    </row>
    <row r="36" spans="1:7" s="6" customFormat="true" ht="15" hidden="true" customHeight="true">
      <c r="A36" s="4" />
      <c r="B36" s="7" t="s">
        <v>40</v>
      </c>
      <c r="C36" s="8" t="s">
        <v>7</v>
      </c>
      <c r="D36" s="9" t="s">
        <v>8</v>
      </c>
      <c r="E36" s="9" t="s">
        <v>9</v>
      </c>
      <c r="F36" s="9" t="s">
        <v>8</v>
      </c>
      <c r="G36" s="10">
        <v>82.5</v>
      </c>
    </row>
    <row r="37" spans="1:7" s="6" customFormat="true" ht="15" hidden="true" customHeight="true">
      <c r="A37" s="4" />
      <c r="B37" s="7" t="s">
        <v>41</v>
      </c>
      <c r="C37" s="8" t="s">
        <v>7</v>
      </c>
      <c r="D37" s="9" t="s">
        <v>8</v>
      </c>
      <c r="E37" s="9" t="s">
        <v>9</v>
      </c>
      <c r="F37" s="9" t="s">
        <v>8</v>
      </c>
      <c r="G37" s="10">
        <v>82.5</v>
      </c>
    </row>
    <row r="38" spans="1:7" s="6" customFormat="true" ht="15" hidden="true" customHeight="true">
      <c r="A38" s="4" />
      <c r="B38" s="7" t="s">
        <v>42</v>
      </c>
      <c r="C38" s="8" t="s">
        <v>7</v>
      </c>
      <c r="D38" s="9" t="s">
        <v>8</v>
      </c>
      <c r="E38" s="9" t="s">
        <v>9</v>
      </c>
      <c r="F38" s="9" t="s">
        <v>8</v>
      </c>
      <c r="G38" s="10">
        <v>82.5</v>
      </c>
    </row>
    <row r="39" spans="1:7" s="6" customFormat="true" ht="15" customHeight="true">
      <c r="A39" s="4" />
      <c r="B39" s="7" t="s">
        <v>43</v>
      </c>
      <c r="C39" s="8" t="s">
        <v>7</v>
      </c>
      <c r="D39" s="9" t="s">
        <v>8</v>
      </c>
      <c r="E39" s="9" t="s">
        <v>9</v>
      </c>
      <c r="F39" s="9" t="s">
        <v>8</v>
      </c>
      <c r="G39" s="10" t="s">
        <v>19</v>
      </c>
    </row>
    <row r="40" spans="1:7" s="6" customFormat="true" ht="15" customHeight="true">
      <c r="A40" s="4" />
      <c r="B40" s="7" t="s">
        <v>44</v>
      </c>
      <c r="C40" s="8" t="s">
        <v>7</v>
      </c>
      <c r="D40" s="9" t="s">
        <v>8</v>
      </c>
      <c r="E40" s="9" t="s">
        <v>9</v>
      </c>
      <c r="F40" s="9" t="s">
        <v>8</v>
      </c>
      <c r="G40" s="10" t="s">
        <v>19</v>
      </c>
    </row>
    <row r="41" spans="2:7" ht="15" customHeight="true">
      <c r="B41" s="11" t="s">
        <v>45</v>
      </c>
      <c r="C41" s="12" t="s">
        <v>7</v>
      </c>
      <c r="D41" s="13" t="s">
        <v>8</v>
      </c>
      <c r="E41" s="13" t="s">
        <v>9</v>
      </c>
      <c r="F41" s="13" t="s">
        <v>8</v>
      </c>
      <c r="G41" s="14" t="s">
        <v>19</v>
      </c>
    </row>
    <row r="42" spans="1:7" s="6" customFormat="true" ht="15" hidden="true" customHeight="true">
      <c r="A42" s="4" />
      <c r="B42" s="7" t="s">
        <v>46</v>
      </c>
      <c r="C42" s="8" t="s">
        <v>7</v>
      </c>
      <c r="D42" s="9" t="s">
        <v>8</v>
      </c>
      <c r="E42" s="9" t="s">
        <v>9</v>
      </c>
      <c r="F42" s="9" t="s">
        <v>8</v>
      </c>
      <c r="G42" s="10">
        <v>86.5</v>
      </c>
    </row>
    <row r="43" spans="1:7" ht="15" hidden="true" customHeight="true">
      <c r="A43" s="4" />
      <c r="B43" s="7" t="s">
        <v>47</v>
      </c>
      <c r="C43" s="8" t="s">
        <v>7</v>
      </c>
      <c r="D43" s="9" t="s">
        <v>8</v>
      </c>
      <c r="E43" s="9" t="s">
        <v>9</v>
      </c>
      <c r="F43" s="9" t="s">
        <v>8</v>
      </c>
      <c r="G43" s="10">
        <v>82.5</v>
      </c>
    </row>
    <row r="44" spans="1:7" s="6" customFormat="true" ht="15" hidden="true" customHeight="true">
      <c r="A44" s="4" />
      <c r="B44" s="7" t="s">
        <v>47</v>
      </c>
      <c r="C44" s="8" t="s">
        <v>7</v>
      </c>
      <c r="D44" s="9" t="s">
        <v>8</v>
      </c>
      <c r="E44" s="9" t="s">
        <v>9</v>
      </c>
      <c r="F44" s="9" t="s">
        <v>8</v>
      </c>
      <c r="G44" s="10">
        <v>86</v>
      </c>
    </row>
    <row r="45" spans="1:7" s="6" customFormat="true" ht="15" hidden="true" customHeight="true">
      <c r="A45" s="4" />
      <c r="B45" s="7" t="s">
        <v>48</v>
      </c>
      <c r="C45" s="8" t="s">
        <v>7</v>
      </c>
      <c r="D45" s="9" t="s">
        <v>8</v>
      </c>
      <c r="E45" s="9" t="s">
        <v>9</v>
      </c>
      <c r="F45" s="9" t="s">
        <v>8</v>
      </c>
      <c r="G45" s="10">
        <v>82.5</v>
      </c>
    </row>
    <row r="46" spans="1:7" s="6" customFormat="true" ht="15" hidden="true" customHeight="true">
      <c r="A46" s="4" />
      <c r="B46" s="7" t="s">
        <v>49</v>
      </c>
      <c r="C46" s="8" t="s">
        <v>7</v>
      </c>
      <c r="D46" s="9" t="s">
        <v>8</v>
      </c>
      <c r="E46" s="9" t="s">
        <v>9</v>
      </c>
      <c r="F46" s="9" t="s">
        <v>8</v>
      </c>
      <c r="G46" s="10">
        <v>82.5</v>
      </c>
    </row>
    <row r="47" spans="1:7" s="6" customFormat="true" ht="15" hidden="true" customHeight="true">
      <c r="A47" s="4" />
      <c r="B47" s="7" t="s">
        <v>50</v>
      </c>
      <c r="C47" s="8" t="s">
        <v>7</v>
      </c>
      <c r="D47" s="9" t="s">
        <v>8</v>
      </c>
      <c r="E47" s="9" t="s">
        <v>9</v>
      </c>
      <c r="F47" s="9" t="s">
        <v>8</v>
      </c>
      <c r="G47" s="10">
        <v>82.5</v>
      </c>
    </row>
    <row r="48" spans="1:7" s="6" customFormat="true" ht="15" hidden="true" customHeight="true">
      <c r="A48" s="4" />
      <c r="B48" s="7" t="s">
        <v>51</v>
      </c>
      <c r="C48" s="8" t="s">
        <v>7</v>
      </c>
      <c r="D48" s="9" t="s">
        <v>8</v>
      </c>
      <c r="E48" s="9" t="s">
        <v>9</v>
      </c>
      <c r="F48" s="9" t="s">
        <v>8</v>
      </c>
      <c r="G48" s="10">
        <v>82.5</v>
      </c>
    </row>
    <row r="49" spans="1:7" s="6" customFormat="true" ht="15" hidden="true" customHeight="true">
      <c r="A49" s="4" />
      <c r="B49" s="7" t="s">
        <v>52</v>
      </c>
      <c r="C49" s="8" t="s">
        <v>7</v>
      </c>
      <c r="D49" s="9" t="s">
        <v>8</v>
      </c>
      <c r="E49" s="9" t="s">
        <v>9</v>
      </c>
      <c r="F49" s="9" t="s">
        <v>8</v>
      </c>
      <c r="G49" s="10">
        <v>82.5</v>
      </c>
    </row>
    <row r="50" spans="1:7" s="6" customFormat="true" ht="15" hidden="true" customHeight="true">
      <c r="A50" s="4" />
      <c r="B50" s="7" t="s">
        <v>53</v>
      </c>
      <c r="C50" s="8" t="s">
        <v>7</v>
      </c>
      <c r="D50" s="9" t="s">
        <v>8</v>
      </c>
      <c r="E50" s="9" t="s">
        <v>9</v>
      </c>
      <c r="F50" s="9" t="s">
        <v>8</v>
      </c>
      <c r="G50" s="10">
        <v>82.5</v>
      </c>
    </row>
    <row r="51" spans="1:7" s="6" customFormat="true" ht="15" hidden="true" customHeight="true">
      <c r="A51" s="4" />
      <c r="B51" s="7" t="s">
        <v>54</v>
      </c>
      <c r="C51" s="8" t="s">
        <v>7</v>
      </c>
      <c r="D51" s="9" t="s">
        <v>8</v>
      </c>
      <c r="E51" s="9" t="s">
        <v>9</v>
      </c>
      <c r="F51" s="9" t="s">
        <v>8</v>
      </c>
      <c r="G51" s="10">
        <v>82.5</v>
      </c>
    </row>
    <row r="52" spans="1:7" s="6" customFormat="true" ht="15" customHeight="true">
      <c r="A52" s="4" />
      <c r="B52" s="7" t="s">
        <v>55</v>
      </c>
      <c r="C52" s="8" t="s">
        <v>7</v>
      </c>
      <c r="D52" s="9" t="s">
        <v>8</v>
      </c>
      <c r="E52" s="9" t="s">
        <v>9</v>
      </c>
      <c r="F52" s="9" t="s">
        <v>8</v>
      </c>
      <c r="G52" s="10" t="s">
        <v>19</v>
      </c>
    </row>
    <row r="53" spans="1:7" s="6" customFormat="true" ht="15" customHeight="true">
      <c r="A53" s="4" />
      <c r="B53" s="7" t="s">
        <v>56</v>
      </c>
      <c r="C53" s="8" t="s">
        <v>7</v>
      </c>
      <c r="D53" s="9" t="s">
        <v>8</v>
      </c>
      <c r="E53" s="9" t="s">
        <v>9</v>
      </c>
      <c r="F53" s="9" t="s">
        <v>8</v>
      </c>
      <c r="G53" s="10" t="s">
        <v>19</v>
      </c>
    </row>
    <row r="54" spans="2:7" ht="15" customHeight="true">
      <c r="B54" s="11" t="s">
        <v>57</v>
      </c>
      <c r="C54" s="12" t="s">
        <v>7</v>
      </c>
      <c r="D54" s="13" t="s">
        <v>8</v>
      </c>
      <c r="E54" s="13" t="s">
        <v>9</v>
      </c>
      <c r="F54" s="13" t="s">
        <v>8</v>
      </c>
      <c r="G54" s="14" t="s">
        <v>19</v>
      </c>
    </row>
    <row r="55" spans="1:7" s="6" customFormat="true" ht="15" hidden="true" customHeight="true">
      <c r="A55" s="4" />
      <c r="B55" s="7" t="s">
        <v>58</v>
      </c>
      <c r="C55" s="8" t="s">
        <v>7</v>
      </c>
      <c r="D55" s="9" t="s">
        <v>8</v>
      </c>
      <c r="E55" s="9" t="s">
        <v>9</v>
      </c>
      <c r="F55" s="9" t="s">
        <v>8</v>
      </c>
      <c r="G55" s="10">
        <v>84.5</v>
      </c>
    </row>
    <row r="56" spans="1:7" s="6" customFormat="true" ht="15" hidden="true" customHeight="true">
      <c r="A56" s="4" />
      <c r="B56" s="7" t="s">
        <v>59</v>
      </c>
      <c r="C56" s="8" t="s">
        <v>7</v>
      </c>
      <c r="D56" s="9" t="s">
        <v>8</v>
      </c>
      <c r="E56" s="9" t="s">
        <v>9</v>
      </c>
      <c r="F56" s="9" t="s">
        <v>8</v>
      </c>
      <c r="G56" s="10">
        <v>84.5</v>
      </c>
    </row>
    <row r="57" spans="1:7" s="6" customFormat="true" ht="15" hidden="true" customHeight="true">
      <c r="A57" s="4" />
      <c r="B57" s="7" t="s">
        <v>60</v>
      </c>
      <c r="C57" s="8" t="s">
        <v>7</v>
      </c>
      <c r="D57" s="9" t="s">
        <v>8</v>
      </c>
      <c r="E57" s="9" t="s">
        <v>9</v>
      </c>
      <c r="F57" s="9" t="s">
        <v>8</v>
      </c>
      <c r="G57" s="10">
        <v>84.5</v>
      </c>
    </row>
    <row r="58" spans="1:7" s="6" customFormat="true" ht="15" hidden="true" customHeight="true">
      <c r="A58" s="4" />
      <c r="B58" s="7" t="s">
        <v>61</v>
      </c>
      <c r="C58" s="8" t="s">
        <v>7</v>
      </c>
      <c r="D58" s="9" t="s">
        <v>8</v>
      </c>
      <c r="E58" s="9" t="s">
        <v>9</v>
      </c>
      <c r="F58" s="9" t="s">
        <v>8</v>
      </c>
      <c r="G58" s="10">
        <v>84.5</v>
      </c>
    </row>
    <row r="59" spans="1:7" s="6" customFormat="true" ht="15" hidden="true" customHeight="true">
      <c r="A59" s="4" />
      <c r="B59" s="7" t="s">
        <v>62</v>
      </c>
      <c r="C59" s="8" t="s">
        <v>7</v>
      </c>
      <c r="D59" s="9" t="s">
        <v>8</v>
      </c>
      <c r="E59" s="9" t="s">
        <v>9</v>
      </c>
      <c r="F59" s="9" t="s">
        <v>8</v>
      </c>
      <c r="G59" s="10">
        <v>84.5</v>
      </c>
    </row>
    <row r="60" spans="1:7" s="6" customFormat="true" ht="15" hidden="true" customHeight="true">
      <c r="A60" s="4" />
      <c r="B60" s="7" t="s">
        <v>63</v>
      </c>
      <c r="C60" s="8" t="s">
        <v>7</v>
      </c>
      <c r="D60" s="9" t="s">
        <v>8</v>
      </c>
      <c r="E60" s="9" t="s">
        <v>9</v>
      </c>
      <c r="F60" s="9" t="s">
        <v>8</v>
      </c>
      <c r="G60" s="10">
        <v>84.5</v>
      </c>
    </row>
    <row r="61" spans="1:7" s="6" customFormat="true" ht="15" hidden="true" customHeight="true">
      <c r="A61" s="4" />
      <c r="B61" s="7" t="s">
        <v>64</v>
      </c>
      <c r="C61" s="8" t="s">
        <v>7</v>
      </c>
      <c r="D61" s="9" t="s">
        <v>8</v>
      </c>
      <c r="E61" s="9" t="s">
        <v>9</v>
      </c>
      <c r="F61" s="9" t="s">
        <v>8</v>
      </c>
      <c r="G61" s="10" t="s">
        <v>19</v>
      </c>
    </row>
    <row r="62" spans="1:7" s="6" customFormat="true" ht="15" hidden="true" customHeight="true">
      <c r="A62" s="4" />
      <c r="B62" s="7" t="s">
        <v>65</v>
      </c>
      <c r="C62" s="8" t="s">
        <v>7</v>
      </c>
      <c r="D62" s="9" t="s">
        <v>8</v>
      </c>
      <c r="E62" s="9" t="s">
        <v>9</v>
      </c>
      <c r="F62" s="9" t="s">
        <v>8</v>
      </c>
      <c r="G62" s="10" t="s">
        <v>19</v>
      </c>
    </row>
    <row r="63" spans="2:7" ht="15" hidden="true" customHeight="true">
      <c r="B63" s="11" t="s">
        <v>66</v>
      </c>
      <c r="C63" s="12" t="s">
        <v>7</v>
      </c>
      <c r="D63" s="13" t="s">
        <v>8</v>
      </c>
      <c r="E63" s="13" t="s">
        <v>9</v>
      </c>
      <c r="F63" s="13" t="s">
        <v>8</v>
      </c>
      <c r="G63" s="14" t="s">
        <v>19</v>
      </c>
    </row>
    <row r="64" spans="2:7" ht="15" customHeight="true">
      <c r="B64" s="11" t="s">
        <v>67</v>
      </c>
      <c r="C64" s="12" t="s">
        <v>7</v>
      </c>
      <c r="D64" s="13" t="s">
        <v>8</v>
      </c>
      <c r="E64" s="13" t="s">
        <v>9</v>
      </c>
      <c r="F64" s="13" t="s">
        <v>8</v>
      </c>
      <c r="G64" s="14" t="s">
        <v>19</v>
      </c>
    </row>
    <row r="65" spans="1:7" s="6" customFormat="true" ht="15" customHeight="true">
      <c r="A65" s="4" />
      <c r="B65" s="7" t="s">
        <v>68</v>
      </c>
      <c r="C65" s="8" t="s">
        <v>7</v>
      </c>
      <c r="D65" s="9" t="s">
        <v>8</v>
      </c>
      <c r="E65" s="9" t="s">
        <v>9</v>
      </c>
      <c r="F65" s="9" t="s">
        <v>8</v>
      </c>
      <c r="G65" s="10" t="s">
        <v>19</v>
      </c>
    </row>
    <row r="66" spans="2:7" ht="15" customHeight="true">
      <c r="B66" s="11" t="s">
        <v>69</v>
      </c>
      <c r="C66" s="12" t="s">
        <v>7</v>
      </c>
      <c r="D66" s="13" t="s">
        <v>8</v>
      </c>
      <c r="E66" s="13" t="s">
        <v>9</v>
      </c>
      <c r="F66" s="13" t="s">
        <v>8</v>
      </c>
      <c r="G66" s="14" t="s">
        <v>19</v>
      </c>
    </row>
    <row r="67" spans="2:7" ht="15" hidden="true" customHeight="true">
      <c r="B67" s="11" t="s">
        <v>70</v>
      </c>
      <c r="C67" s="12" t="s">
        <v>7</v>
      </c>
      <c r="D67" s="13" t="s">
        <v>8</v>
      </c>
      <c r="E67" s="13" t="s">
        <v>9</v>
      </c>
      <c r="F67" s="13" t="s">
        <v>8</v>
      </c>
      <c r="G67" s="14">
        <v>84.5</v>
      </c>
    </row>
    <row r="68" spans="2:7" ht="15" hidden="true" customHeight="true">
      <c r="B68" s="11" t="s">
        <v>71</v>
      </c>
      <c r="C68" s="12" t="s">
        <v>7</v>
      </c>
      <c r="D68" s="13" t="s">
        <v>8</v>
      </c>
      <c r="E68" s="13" t="s">
        <v>9</v>
      </c>
      <c r="F68" s="13" t="s">
        <v>8</v>
      </c>
      <c r="G68" s="14">
        <v>84.5</v>
      </c>
    </row>
    <row r="69" spans="2:7" ht="15" hidden="true" customHeight="true">
      <c r="B69" s="11" t="s">
        <v>72</v>
      </c>
      <c r="C69" s="12" t="s">
        <v>7</v>
      </c>
      <c r="D69" s="13" t="s">
        <v>8</v>
      </c>
      <c r="E69" s="13" t="s">
        <v>9</v>
      </c>
      <c r="F69" s="13" t="s">
        <v>8</v>
      </c>
      <c r="G69" s="14">
        <v>84.5</v>
      </c>
    </row>
    <row r="70" spans="2:7" ht="15" hidden="true" customHeight="true">
      <c r="B70" s="11" t="s">
        <v>73</v>
      </c>
      <c r="C70" s="12" t="s">
        <v>7</v>
      </c>
      <c r="D70" s="13" t="s">
        <v>8</v>
      </c>
      <c r="E70" s="13" t="s">
        <v>9</v>
      </c>
      <c r="F70" s="13" t="s">
        <v>8</v>
      </c>
      <c r="G70" s="14">
        <v>84.5</v>
      </c>
    </row>
    <row r="71" spans="2:7" ht="15" hidden="true" customHeight="true">
      <c r="B71" s="11" t="s">
        <v>74</v>
      </c>
      <c r="C71" s="12" t="s">
        <v>7</v>
      </c>
      <c r="D71" s="13" t="s">
        <v>8</v>
      </c>
      <c r="E71" s="13" t="s">
        <v>9</v>
      </c>
      <c r="F71" s="13" t="s">
        <v>8</v>
      </c>
      <c r="G71" s="14">
        <v>84.5</v>
      </c>
    </row>
    <row r="72" spans="2:7" ht="15" hidden="true" customHeight="true">
      <c r="B72" s="11" t="s">
        <v>75</v>
      </c>
      <c r="C72" s="12" t="s">
        <v>7</v>
      </c>
      <c r="D72" s="13" t="s">
        <v>8</v>
      </c>
      <c r="E72" s="13" t="s">
        <v>9</v>
      </c>
      <c r="F72" s="13" t="s">
        <v>8</v>
      </c>
      <c r="G72" s="14">
        <v>84.5</v>
      </c>
    </row>
    <row r="73" spans="1:7" s="6" customFormat="true" ht="15" hidden="true" customHeight="true">
      <c r="A73" s="4" />
      <c r="B73" s="7" t="s">
        <v>76</v>
      </c>
      <c r="C73" s="8" t="s">
        <v>7</v>
      </c>
      <c r="D73" s="9" t="s">
        <v>8</v>
      </c>
      <c r="E73" s="9" t="s">
        <v>9</v>
      </c>
      <c r="F73" s="9" t="s">
        <v>8</v>
      </c>
      <c r="G73" s="10" t="s">
        <v>19</v>
      </c>
    </row>
    <row r="74" spans="1:7" s="6" customFormat="true" ht="15" hidden="true" customHeight="true">
      <c r="A74" s="4" />
      <c r="B74" s="7" t="s">
        <v>77</v>
      </c>
      <c r="C74" s="8" t="s">
        <v>7</v>
      </c>
      <c r="D74" s="9" t="s">
        <v>8</v>
      </c>
      <c r="E74" s="9" t="s">
        <v>9</v>
      </c>
      <c r="F74" s="9" t="s">
        <v>8</v>
      </c>
      <c r="G74" s="10" t="s">
        <v>19</v>
      </c>
    </row>
    <row r="75" spans="2:7" ht="15" hidden="true" customHeight="true">
      <c r="B75" s="11" t="s">
        <v>78</v>
      </c>
      <c r="C75" s="12" t="s">
        <v>7</v>
      </c>
      <c r="D75" s="13" t="s">
        <v>8</v>
      </c>
      <c r="E75" s="13" t="s">
        <v>9</v>
      </c>
      <c r="F75" s="13" t="s">
        <v>8</v>
      </c>
      <c r="G75" s="14" t="s">
        <v>19</v>
      </c>
    </row>
    <row r="76" spans="1:7" s="6" customFormat="true" ht="15" customHeight="true">
      <c r="A76" s="4" />
      <c r="B76" s="7" t="s">
        <v>79</v>
      </c>
      <c r="C76" s="8" t="s">
        <v>7</v>
      </c>
      <c r="D76" s="9" t="s">
        <v>8</v>
      </c>
      <c r="E76" s="9" t="s">
        <v>9</v>
      </c>
      <c r="F76" s="9" t="s">
        <v>8</v>
      </c>
      <c r="G76" s="10" t="s">
        <v>19</v>
      </c>
    </row>
    <row r="77" spans="1:7" s="6" customFormat="true" ht="15" customHeight="true">
      <c r="A77" s="4" />
      <c r="B77" s="7" t="s">
        <v>80</v>
      </c>
      <c r="C77" s="8" t="s">
        <v>7</v>
      </c>
      <c r="D77" s="9" t="s">
        <v>8</v>
      </c>
      <c r="E77" s="9" t="s">
        <v>9</v>
      </c>
      <c r="F77" s="9" t="s">
        <v>8</v>
      </c>
      <c r="G77" s="10" t="s">
        <v>19</v>
      </c>
    </row>
    <row r="78" spans="2:7" ht="15" customHeight="true">
      <c r="B78" s="11" t="s">
        <v>81</v>
      </c>
      <c r="C78" s="12" t="s">
        <v>7</v>
      </c>
      <c r="D78" s="13" t="s">
        <v>8</v>
      </c>
      <c r="E78" s="13" t="s">
        <v>9</v>
      </c>
      <c r="F78" s="13" t="s">
        <v>8</v>
      </c>
      <c r="G78" s="14" t="s">
        <v>19</v>
      </c>
    </row>
    <row r="79" spans="2:7" ht="15" hidden="true" customHeight="true">
      <c r="B79" s="11" t="s">
        <v>82</v>
      </c>
      <c r="C79" s="12" t="s">
        <v>7</v>
      </c>
      <c r="D79" s="13" t="s">
        <v>8</v>
      </c>
      <c r="E79" s="13" t="s">
        <v>9</v>
      </c>
      <c r="F79" s="13" t="s">
        <v>8</v>
      </c>
      <c r="G79" s="14">
        <v>84.5</v>
      </c>
    </row>
    <row r="80" spans="2:7" ht="15" hidden="true" customHeight="true">
      <c r="B80" s="11" t="s">
        <v>83</v>
      </c>
      <c r="C80" s="12" t="s">
        <v>7</v>
      </c>
      <c r="D80" s="13" t="s">
        <v>8</v>
      </c>
      <c r="E80" s="13" t="s">
        <v>9</v>
      </c>
      <c r="F80" s="13" t="s">
        <v>8</v>
      </c>
      <c r="G80" s="14">
        <v>84.5</v>
      </c>
    </row>
    <row r="81" spans="2:7" ht="15" hidden="true" customHeight="true">
      <c r="B81" s="11" t="s">
        <v>84</v>
      </c>
      <c r="C81" s="12" t="s">
        <v>7</v>
      </c>
      <c r="D81" s="13" t="s">
        <v>8</v>
      </c>
      <c r="E81" s="13" t="s">
        <v>9</v>
      </c>
      <c r="F81" s="13" t="s">
        <v>8</v>
      </c>
      <c r="G81" s="14">
        <v>84.5</v>
      </c>
    </row>
    <row r="82" spans="2:7" ht="15" hidden="true" customHeight="true">
      <c r="B82" s="11" t="s">
        <v>85</v>
      </c>
      <c r="C82" s="12" t="s">
        <v>7</v>
      </c>
      <c r="D82" s="13" t="s">
        <v>8</v>
      </c>
      <c r="E82" s="13" t="s">
        <v>9</v>
      </c>
      <c r="F82" s="13" t="s">
        <v>8</v>
      </c>
      <c r="G82" s="14">
        <v>84.5</v>
      </c>
    </row>
    <row r="83" spans="2:7" ht="15" hidden="true" customHeight="true">
      <c r="B83" s="11" t="s">
        <v>86</v>
      </c>
      <c r="C83" s="12" t="s">
        <v>7</v>
      </c>
      <c r="D83" s="13" t="s">
        <v>8</v>
      </c>
      <c r="E83" s="13" t="s">
        <v>9</v>
      </c>
      <c r="F83" s="13" t="s">
        <v>8</v>
      </c>
      <c r="G83" s="14">
        <v>84.5</v>
      </c>
    </row>
    <row r="84" spans="2:7" ht="15" hidden="true" customHeight="true">
      <c r="B84" s="11" t="s">
        <v>87</v>
      </c>
      <c r="C84" s="12" t="s">
        <v>7</v>
      </c>
      <c r="D84" s="13" t="s">
        <v>8</v>
      </c>
      <c r="E84" s="13" t="s">
        <v>9</v>
      </c>
      <c r="F84" s="13" t="s">
        <v>8</v>
      </c>
      <c r="G84" s="14">
        <v>84</v>
      </c>
    </row>
    <row r="85" spans="2:7" ht="15" hidden="true" customHeight="true">
      <c r="B85" s="11" t="s">
        <v>88</v>
      </c>
      <c r="C85" s="12" t="s">
        <v>7</v>
      </c>
      <c r="D85" s="13" t="s">
        <v>8</v>
      </c>
      <c r="E85" s="13" t="s">
        <v>9</v>
      </c>
      <c r="F85" s="13" t="s">
        <v>8</v>
      </c>
      <c r="G85" s="14" t="s">
        <v>19</v>
      </c>
    </row>
    <row r="86" spans="1:7" s="6" customFormat="true" ht="15" hidden="true" customHeight="true">
      <c r="A86" s="4" />
      <c r="B86" s="7" t="s">
        <v>89</v>
      </c>
      <c r="C86" s="8" t="s">
        <v>7</v>
      </c>
      <c r="D86" s="9" t="s">
        <v>8</v>
      </c>
      <c r="E86" s="9" t="s">
        <v>9</v>
      </c>
      <c r="F86" s="9" t="s">
        <v>8</v>
      </c>
      <c r="G86" s="10" t="s">
        <v>19</v>
      </c>
    </row>
    <row r="87" spans="2:7" ht="15" hidden="true" customHeight="true">
      <c r="B87" s="11" t="s">
        <v>90</v>
      </c>
      <c r="C87" s="12" t="s">
        <v>7</v>
      </c>
      <c r="D87" s="13" t="s">
        <v>8</v>
      </c>
      <c r="E87" s="13" t="s">
        <v>9</v>
      </c>
      <c r="F87" s="13" t="s">
        <v>8</v>
      </c>
      <c r="G87" s="14" t="s">
        <v>19</v>
      </c>
    </row>
    <row r="88" spans="1:7" s="6" customFormat="true" ht="15" customHeight="true">
      <c r="A88" s="4" />
      <c r="B88" s="7" t="s">
        <v>91</v>
      </c>
      <c r="C88" s="8" t="s">
        <v>7</v>
      </c>
      <c r="D88" s="9" t="s">
        <v>8</v>
      </c>
      <c r="E88" s="9" t="s">
        <v>9</v>
      </c>
      <c r="F88" s="9" t="s">
        <v>8</v>
      </c>
      <c r="G88" s="10" t="s">
        <v>19</v>
      </c>
    </row>
    <row r="89" spans="2:7" ht="15" customHeight="true">
      <c r="B89" s="11" t="s">
        <v>92</v>
      </c>
      <c r="C89" s="12" t="s">
        <v>7</v>
      </c>
      <c r="D89" s="13" t="s">
        <v>8</v>
      </c>
      <c r="E89" s="13" t="s">
        <v>9</v>
      </c>
      <c r="F89" s="13" t="s">
        <v>8</v>
      </c>
      <c r="G89" s="14" t="s">
        <v>19</v>
      </c>
    </row>
    <row r="90" spans="2:7" ht="15" customHeight="true">
      <c r="B90" s="11" t="s">
        <v>93</v>
      </c>
      <c r="C90" s="12" t="s">
        <v>7</v>
      </c>
      <c r="D90" s="13" t="s">
        <v>8</v>
      </c>
      <c r="E90" s="13" t="s">
        <v>9</v>
      </c>
      <c r="F90" s="13" t="s">
        <v>8</v>
      </c>
      <c r="G90" s="14" t="s">
        <v>19</v>
      </c>
    </row>
    <row r="91" spans="2:7" ht="15" hidden="true" customHeight="true">
      <c r="B91" s="11" t="s">
        <v>94</v>
      </c>
      <c r="C91" s="12" t="s">
        <v>7</v>
      </c>
      <c r="D91" s="13" t="s">
        <v>8</v>
      </c>
      <c r="E91" s="13" t="s">
        <v>9</v>
      </c>
      <c r="F91" s="13" t="s">
        <v>8</v>
      </c>
      <c r="G91" s="14">
        <v>84.5</v>
      </c>
    </row>
    <row r="92" spans="2:7" ht="15" hidden="true" customHeight="true">
      <c r="B92" s="11" t="s">
        <v>95</v>
      </c>
      <c r="C92" s="12" t="s">
        <v>7</v>
      </c>
      <c r="D92" s="13" t="s">
        <v>8</v>
      </c>
      <c r="E92" s="13" t="s">
        <v>9</v>
      </c>
      <c r="F92" s="13" t="s">
        <v>8</v>
      </c>
      <c r="G92" s="14">
        <v>84.5</v>
      </c>
    </row>
    <row r="93" spans="2:7" ht="15" hidden="true" customHeight="true">
      <c r="B93" s="11" t="s">
        <v>96</v>
      </c>
      <c r="C93" s="12" t="s">
        <v>7</v>
      </c>
      <c r="D93" s="13" t="s">
        <v>8</v>
      </c>
      <c r="E93" s="13" t="s">
        <v>9</v>
      </c>
      <c r="F93" s="13" t="s">
        <v>8</v>
      </c>
      <c r="G93" s="14">
        <v>84.5</v>
      </c>
    </row>
    <row r="94" spans="2:7" ht="15" hidden="true" customHeight="true">
      <c r="B94" s="11" t="s">
        <v>97</v>
      </c>
      <c r="C94" s="12" t="s">
        <v>7</v>
      </c>
      <c r="D94" s="13" t="s">
        <v>8</v>
      </c>
      <c r="E94" s="13" t="s">
        <v>9</v>
      </c>
      <c r="F94" s="13" t="s">
        <v>8</v>
      </c>
      <c r="G94" s="14">
        <v>84.5</v>
      </c>
    </row>
    <row r="95" spans="2:7" ht="15" hidden="true" customHeight="true">
      <c r="B95" s="11" t="s">
        <v>98</v>
      </c>
      <c r="C95" s="12" t="s">
        <v>7</v>
      </c>
      <c r="D95" s="13" t="s">
        <v>8</v>
      </c>
      <c r="E95" s="13" t="s">
        <v>9</v>
      </c>
      <c r="F95" s="13" t="s">
        <v>8</v>
      </c>
      <c r="G95" s="14">
        <v>84.5</v>
      </c>
    </row>
    <row r="96" spans="1:7" s="6" customFormat="true" ht="15" hidden="true" customHeight="true">
      <c r="A96" s="4" />
      <c r="B96" s="7" t="s">
        <v>99</v>
      </c>
      <c r="C96" s="8" t="s">
        <v>7</v>
      </c>
      <c r="D96" s="9" t="s">
        <v>8</v>
      </c>
      <c r="E96" s="9" t="s">
        <v>9</v>
      </c>
      <c r="F96" s="9" t="s">
        <v>8</v>
      </c>
      <c r="G96" s="10" t="s">
        <v>19</v>
      </c>
    </row>
    <row r="97" spans="1:7" s="6" customFormat="true" ht="15" hidden="true" customHeight="true">
      <c r="A97" s="4" />
      <c r="B97" s="7" t="s">
        <v>100</v>
      </c>
      <c r="C97" s="8" t="s">
        <v>7</v>
      </c>
      <c r="D97" s="9" t="s">
        <v>8</v>
      </c>
      <c r="E97" s="9" t="s">
        <v>9</v>
      </c>
      <c r="F97" s="9" t="s">
        <v>8</v>
      </c>
      <c r="G97" s="10" t="s">
        <v>19</v>
      </c>
    </row>
    <row r="98" spans="1:7" s="6" customFormat="true" ht="15" hidden="true" customHeight="true">
      <c r="A98" s="4" />
      <c r="B98" s="7" t="s">
        <v>101</v>
      </c>
      <c r="C98" s="8" t="s">
        <v>7</v>
      </c>
      <c r="D98" s="9" t="s">
        <v>8</v>
      </c>
      <c r="E98" s="9" t="s">
        <v>9</v>
      </c>
      <c r="F98" s="9" t="s">
        <v>8</v>
      </c>
      <c r="G98" s="10" t="s">
        <v>19</v>
      </c>
    </row>
    <row r="99" spans="2:7" ht="15" hidden="true" customHeight="true">
      <c r="B99" s="11" t="s">
        <v>102</v>
      </c>
      <c r="C99" s="12" t="s">
        <v>7</v>
      </c>
      <c r="D99" s="13" t="s">
        <v>8</v>
      </c>
      <c r="E99" s="13" t="s">
        <v>9</v>
      </c>
      <c r="F99" s="13" t="s">
        <v>8</v>
      </c>
      <c r="G99" s="14" t="s">
        <v>19</v>
      </c>
    </row>
    <row r="100" spans="1:7" s="6" customFormat="true" ht="15" customHeight="true">
      <c r="A100" s="4" />
      <c r="B100" s="7" t="s">
        <v>103</v>
      </c>
      <c r="C100" s="8" t="s">
        <v>7</v>
      </c>
      <c r="D100" s="9" t="s">
        <v>8</v>
      </c>
      <c r="E100" s="9" t="s">
        <v>9</v>
      </c>
      <c r="F100" s="9" t="s">
        <v>8</v>
      </c>
      <c r="G100" s="10" t="s">
        <v>19</v>
      </c>
    </row>
    <row r="101" spans="2:7" ht="15" customHeight="true">
      <c r="B101" s="11" t="s">
        <v>104</v>
      </c>
      <c r="C101" s="12" t="s">
        <v>7</v>
      </c>
      <c r="D101" s="13" t="s">
        <v>8</v>
      </c>
      <c r="E101" s="13" t="s">
        <v>9</v>
      </c>
      <c r="F101" s="13" t="s">
        <v>8</v>
      </c>
      <c r="G101" s="14" t="s">
        <v>19</v>
      </c>
    </row>
    <row r="102" spans="2:7" ht="15" customHeight="true">
      <c r="B102" s="11" t="s">
        <v>105</v>
      </c>
      <c r="C102" s="12" t="s">
        <v>7</v>
      </c>
      <c r="D102" s="13" t="s">
        <v>8</v>
      </c>
      <c r="E102" s="13" t="s">
        <v>9</v>
      </c>
      <c r="F102" s="13" t="s">
        <v>8</v>
      </c>
      <c r="G102" s="14" t="s">
        <v>19</v>
      </c>
    </row>
  </sheetData>
  <printOptions headings="true" gridLines="true" />
  <pageMargins left="0" right="0" top="0" bottom="0" header="0" footer="0" />
  <pageSetup paperSize="0" scale="0" pageOrder="overThenDown" orientation="portrait" blackAndWhite="true" useFirstPageNumber="true" />
  <headerFooter />
</worksheet>
