# Supplementary material for: PLA2G16 expression predicts prognosis and gemcitabine sensitivity in patients with pancreatic cancer
Source: PeerJ journal article supplement (doi:10.7717/peerj.19517), 2025-05-30
Supplement: FIG3B3I.zip [file admin_2023-08-31 11-19-35_CT052869 - Quantification Amplification Results.xlsx › xl/sharedstrings.xml]

<?xml version="1.0"?>
<sst xmlns:xsi="http://www.w3.org/2001/XMLSchema-instance" xmlns:xsd="http://www.w3.org/2001/XMLSchema" xmlns="http://schemas.openxmlformats.org/spreadsheetml/2006/main">
  <si>
    <t>Cycle</t>
  </si>
  <si>
    <t>A1</t>
  </si>
  <si>
    <t>A2</t>
  </si>
  <si>
    <t>A3</t>
  </si>
  <si>
    <t>A4</t>
  </si>
  <si>
    <t>A5</t>
  </si>
  <si>
    <t>A6</t>
  </si>
  <si>
    <t>A7</t>
  </si>
  <si>
    <t>A8</t>
  </si>
  <si>
    <t>A9</t>
  </si>
  <si>
    <t>A10</t>
  </si>
  <si>
    <t>A11</t>
  </si>
  <si>
    <t>A12</t>
  </si>
  <si>
    <t>B1</t>
  </si>
  <si>
    <t>B2</t>
  </si>
  <si>
    <t>B3</t>
  </si>
  <si>
    <t>B4</t>
  </si>
  <si>
    <t>B5</t>
  </si>
  <si>
    <t>B6</t>
  </si>
  <si>
    <t>B7</t>
  </si>
  <si>
    <t>B8</t>
  </si>
  <si>
    <t>B9</t>
  </si>
  <si>
    <t>B10</t>
  </si>
  <si>
    <t>B11</t>
  </si>
  <si>
    <t>B12</t>
  </si>
  <si>
    <t>C1</t>
  </si>
  <si>
    <t>C2</t>
  </si>
  <si>
    <t>C3</t>
  </si>
  <si>
    <t>C4</t>
  </si>
  <si>
    <t>C5</t>
  </si>
  <si>
    <t>C6</t>
  </si>
  <si>
    <t>C7</t>
  </si>
  <si>
    <t>C8</t>
  </si>
  <si>
    <t>C9</t>
  </si>
  <si>
    <t>C10</t>
  </si>
  <si>
    <t>C11</t>
  </si>
  <si>
    <t>C12</t>
  </si>
  <si>
    <t>D1</t>
  </si>
  <si>
    <t>D2</t>
  </si>
  <si>
    <t>D3</t>
  </si>
  <si>
    <t>D4</t>
  </si>
  <si>
    <t>D5</t>
  </si>
  <si>
    <t>D6</t>
  </si>
  <si>
    <t>D7</t>
  </si>
  <si>
    <t>D8</t>
  </si>
  <si>
    <t>D9</t>
  </si>
  <si>
    <t>D10</t>
  </si>
  <si>
    <t>D11</t>
  </si>
  <si>
    <t>D12</t>
  </si>
  <si>
    <t>E1</t>
  </si>
  <si>
    <t>E2</t>
  </si>
  <si>
    <t>E3</t>
  </si>
  <si>
    <t>E4</t>
  </si>
  <si>
    <t>E5</t>
  </si>
  <si>
    <t>E6</t>
  </si>
  <si>
    <t>E7</t>
  </si>
  <si>
    <t>E8</t>
  </si>
  <si>
    <t>E9</t>
  </si>
  <si>
    <t>E10</t>
  </si>
  <si>
    <t>E11</t>
  </si>
  <si>
    <t>E12</t>
  </si>
  <si>
    <t>F1</t>
  </si>
  <si>
    <t>F2</t>
  </si>
  <si>
    <t>F3</t>
  </si>
  <si>
    <t>F4</t>
  </si>
  <si>
    <t>F5</t>
  </si>
  <si>
    <t>F6</t>
  </si>
  <si>
    <t>F7</t>
  </si>
  <si>
    <t>F8</t>
  </si>
  <si>
    <t>F9</t>
  </si>
  <si>
    <t>F10</t>
  </si>
  <si>
    <t>F11</t>
  </si>
  <si>
    <t>F12</t>
  </si>
  <si>
    <t>G1</t>
  </si>
  <si>
    <t>G2</t>
  </si>
  <si>
    <t>G3</t>
  </si>
  <si>
    <t>G4</t>
  </si>
  <si>
    <t>G5</t>
  </si>
  <si>
    <t>G6</t>
  </si>
  <si>
    <t>G7</t>
  </si>
  <si>
    <t>G8</t>
  </si>
  <si>
    <t>G9</t>
  </si>
  <si>
    <t>G10</t>
  </si>
  <si>
    <t>G11</t>
  </si>
  <si>
    <t>G12</t>
  </si>
  <si>
    <t>H1</t>
  </si>
  <si>
    <t>H2</t>
  </si>
  <si>
    <t>H3</t>
  </si>
  <si>
    <t>H4</t>
  </si>
  <si>
    <t>H5</t>
  </si>
  <si>
    <t>H6</t>
  </si>
  <si>
    <t>H7</t>
  </si>
  <si>
    <t>H8</t>
  </si>
  <si>
    <t>H9</t>
  </si>
  <si>
    <t>H10</t>
  </si>
  <si>
    <t>H11</t>
  </si>
  <si>
    <t>H12</t>
  </si>
  <si>
    <t xml:space="preserve">File Name</t>
  </si>
  <si>
    <t xml:space="preserve">admin_2023-08-31 11-19-35_CT052869.pcrd</t>
  </si>
  <si>
    <t xml:space="preserve">Created By User</t>
  </si>
  <si>
    <t>admin</t>
  </si>
  <si>
    <t>Notes</t>
  </si>
  <si>
    <t>ID</t>
  </si>
  <si>
    <t xml:space="preserve">Run Started</t>
  </si>
  <si>
    <t xml:space="preserve">08/31/2023 03:19:43 UTC</t>
  </si>
  <si>
    <t xml:space="preserve">Run Ended</t>
  </si>
  <si>
    <t xml:space="preserve">08/31/2023 04:29:44 UTC</t>
  </si>
  <si>
    <t xml:space="preserve">Sample Vol</t>
  </si>
  <si>
    <t xml:space="preserve">Lid Temp</t>
  </si>
  <si>
    <t xml:space="preserve">Protocol File Name</t>
  </si>
  <si>
    <t xml:space="preserve">20220117 Q-PCR 模板.prcl</t>
  </si>
  <si>
    <t xml:space="preserve">Plate Setup File Name</t>
  </si>
  <si>
    <t xml:space="preserve">Quick Plate_96 wells_SYBR Only.pltd</t>
  </si>
  <si>
    <t xml:space="preserve">Base Serial Number</t>
  </si>
  <si>
    <t>CT052869</t>
  </si>
  <si>
    <t xml:space="preserve">Optical Head Serial Number</t>
  </si>
  <si>
    <t>785BR28537</t>
  </si>
  <si>
    <t xml:space="preserve">CFX Manager Version</t>
  </si>
  <si>
    <t xml:space="preserve">3.1.1517.0823. </t>
  </si>
</sst>
