# Supplementary material for: PLA2G16 expression predicts prognosis and gemcitabine sensitivity in patients with pancreatic cancer
Source: PeerJ journal article supplement (doi:10.7717/peerj.19517), 2025-05-30
Supplement: FIG3B3I.zip [file admin_2023-08-31 11-19-35_CT052869 - Quantification Amplification Results.xlsx › xl/worksheets/sheet1.xml]

<?xml version="1.0"?>
<worksheet xmlns:xsi="http://www.w3.org/2001/XMLSchema-instance" xmlns:xsd="http://www.w3.org/2001/XMLSchema" xmlns="http://schemas.openxmlformats.org/spreadsheetml/2006/main">
  <sheetPr>
    <pageSetUpPr />
  </sheetPr>
  <dimension ref="A1:CT41" />
  <sheetViews>
    <sheetView tabSelected="true" workbookViewId="0">
      <pane xSplit="1" ySplit="1" topLeftCell="B2" state="frozen" />
      <selection pane="bottomRight" activeCell="B2" sqref="B2:B2" />
      <selection pane="topRight" activeCell="B2" sqref="B2:B2" />
      <selection pane="bottomLeft" activeCell="B2" sqref="B2:B2" />
      <selection activeCell="B2" sqref="B2:B2" />
    </sheetView>
  </sheetViews>
  <sheetFormatPr defaultColWidth="10" defaultRowHeight="15" customHeight="true" />
  <cols>
    <col min="1" max="1" width="1.5" style="4" customWidth="true" />
    <col min="2" max="2" width="8.33" style="6" customWidth="true" />
    <col min="3" max="98" width="8.33" style="7" customWidth="true" />
    <col min="99" max="16384" width="10" style="1" customWidth="true" />
  </cols>
  <sheetData>
    <row r="1" spans="1:98" s="2" customFormat="true" ht="15" customHeight="true">
      <c r="A1" s="5" />
      <c r="B1" s="3" t="s">
        <v>0</v>
      </c>
      <c r="C1" s="3" t="s">
        <v>1</v>
      </c>
      <c r="D1" s="3" t="s">
        <v>2</v>
      </c>
      <c r="E1" s="3" t="s">
        <v>3</v>
      </c>
      <c r="F1" s="3" t="s">
        <v>4</v>
      </c>
      <c r="G1" s="3" t="s">
        <v>5</v>
      </c>
      <c r="H1" s="3" t="s">
        <v>6</v>
      </c>
      <c r="I1" s="3" t="s">
        <v>7</v>
      </c>
      <c r="J1" s="3" t="s">
        <v>8</v>
      </c>
      <c r="K1" s="3" t="s">
        <v>9</v>
      </c>
      <c r="L1" s="3" t="s">
        <v>10</v>
      </c>
      <c r="M1" s="3" t="s">
        <v>11</v>
      </c>
      <c r="N1" s="3" t="s">
        <v>12</v>
      </c>
      <c r="O1" s="3" t="s">
        <v>13</v>
      </c>
      <c r="P1" s="3" t="s">
        <v>14</v>
      </c>
      <c r="Q1" s="3" t="s">
        <v>15</v>
      </c>
      <c r="R1" s="3" t="s">
        <v>16</v>
      </c>
      <c r="S1" s="3" t="s">
        <v>17</v>
      </c>
      <c r="T1" s="3" t="s">
        <v>18</v>
      </c>
      <c r="U1" s="3" t="s">
        <v>19</v>
      </c>
      <c r="V1" s="3" t="s">
        <v>20</v>
      </c>
      <c r="W1" s="3" t="s">
        <v>21</v>
      </c>
      <c r="X1" s="3" t="s">
        <v>22</v>
      </c>
      <c r="Y1" s="3" t="s">
        <v>23</v>
      </c>
      <c r="Z1" s="3" t="s">
        <v>24</v>
      </c>
      <c r="AA1" s="3" t="s">
        <v>25</v>
      </c>
      <c r="AB1" s="3" t="s">
        <v>26</v>
      </c>
      <c r="AC1" s="3" t="s">
        <v>27</v>
      </c>
      <c r="AD1" s="3" t="s">
        <v>28</v>
      </c>
      <c r="AE1" s="3" t="s">
        <v>29</v>
      </c>
      <c r="AF1" s="3" t="s">
        <v>30</v>
      </c>
      <c r="AG1" s="3" t="s">
        <v>31</v>
      </c>
      <c r="AH1" s="3" t="s">
        <v>32</v>
      </c>
      <c r="AI1" s="3" t="s">
        <v>33</v>
      </c>
      <c r="AJ1" s="3" t="s">
        <v>34</v>
      </c>
      <c r="AK1" s="3" t="s">
        <v>35</v>
      </c>
      <c r="AL1" s="3" t="s">
        <v>36</v>
      </c>
      <c r="AM1" s="3" t="s">
        <v>37</v>
      </c>
      <c r="AN1" s="3" t="s">
        <v>38</v>
      </c>
      <c r="AO1" s="3" t="s">
        <v>39</v>
      </c>
      <c r="AP1" s="3" t="s">
        <v>40</v>
      </c>
      <c r="AQ1" s="3" t="s">
        <v>41</v>
      </c>
      <c r="AR1" s="3" t="s">
        <v>42</v>
      </c>
      <c r="AS1" s="3" t="s">
        <v>43</v>
      </c>
      <c r="AT1" s="3" t="s">
        <v>44</v>
      </c>
      <c r="AU1" s="3" t="s">
        <v>45</v>
      </c>
      <c r="AV1" s="3" t="s">
        <v>46</v>
      </c>
      <c r="AW1" s="3" t="s">
        <v>47</v>
      </c>
      <c r="AX1" s="3" t="s">
        <v>48</v>
      </c>
      <c r="AY1" s="3" t="s">
        <v>49</v>
      </c>
      <c r="AZ1" s="3" t="s">
        <v>50</v>
      </c>
      <c r="BA1" s="3" t="s">
        <v>51</v>
      </c>
      <c r="BB1" s="3" t="s">
        <v>52</v>
      </c>
      <c r="BC1" s="3" t="s">
        <v>53</v>
      </c>
      <c r="BD1" s="3" t="s">
        <v>54</v>
      </c>
      <c r="BE1" s="3" t="s">
        <v>55</v>
      </c>
      <c r="BF1" s="3" t="s">
        <v>56</v>
      </c>
      <c r="BG1" s="3" t="s">
        <v>57</v>
      </c>
      <c r="BH1" s="3" t="s">
        <v>58</v>
      </c>
      <c r="BI1" s="3" t="s">
        <v>59</v>
      </c>
      <c r="BJ1" s="3" t="s">
        <v>60</v>
      </c>
      <c r="BK1" s="3" t="s">
        <v>61</v>
      </c>
      <c r="BL1" s="3" t="s">
        <v>62</v>
      </c>
      <c r="BM1" s="3" t="s">
        <v>63</v>
      </c>
      <c r="BN1" s="3" t="s">
        <v>64</v>
      </c>
      <c r="BO1" s="3" t="s">
        <v>65</v>
      </c>
      <c r="BP1" s="3" t="s">
        <v>66</v>
      </c>
      <c r="BQ1" s="3" t="s">
        <v>67</v>
      </c>
      <c r="BR1" s="3" t="s">
        <v>68</v>
      </c>
      <c r="BS1" s="3" t="s">
        <v>69</v>
      </c>
      <c r="BT1" s="3" t="s">
        <v>70</v>
      </c>
      <c r="BU1" s="3" t="s">
        <v>71</v>
      </c>
      <c r="BV1" s="3" t="s">
        <v>72</v>
      </c>
      <c r="BW1" s="3" t="s">
        <v>73</v>
      </c>
      <c r="BX1" s="3" t="s">
        <v>74</v>
      </c>
      <c r="BY1" s="3" t="s">
        <v>75</v>
      </c>
      <c r="BZ1" s="3" t="s">
        <v>76</v>
      </c>
      <c r="CA1" s="3" t="s">
        <v>77</v>
      </c>
      <c r="CB1" s="3" t="s">
        <v>78</v>
      </c>
      <c r="CC1" s="3" t="s">
        <v>79</v>
      </c>
      <c r="CD1" s="3" t="s">
        <v>80</v>
      </c>
      <c r="CE1" s="3" t="s">
        <v>81</v>
      </c>
      <c r="CF1" s="3" t="s">
        <v>82</v>
      </c>
      <c r="CG1" s="3" t="s">
        <v>83</v>
      </c>
      <c r="CH1" s="3" t="s">
        <v>84</v>
      </c>
      <c r="CI1" s="3" t="s">
        <v>85</v>
      </c>
      <c r="CJ1" s="3" t="s">
        <v>86</v>
      </c>
      <c r="CK1" s="3" t="s">
        <v>87</v>
      </c>
      <c r="CL1" s="3" t="s">
        <v>88</v>
      </c>
      <c r="CM1" s="3" t="s">
        <v>89</v>
      </c>
      <c r="CN1" s="3" t="s">
        <v>90</v>
      </c>
      <c r="CO1" s="3" t="s">
        <v>91</v>
      </c>
      <c r="CP1" s="3" t="s">
        <v>92</v>
      </c>
      <c r="CQ1" s="3" t="s">
        <v>93</v>
      </c>
      <c r="CR1" s="3" t="s">
        <v>94</v>
      </c>
      <c r="CS1" s="3" t="s">
        <v>95</v>
      </c>
      <c r="CT1" s="3" t="s">
        <v>96</v>
      </c>
    </row>
    <row r="2" spans="2:98" ht="15" customHeight="true">
      <c r="B2" s="6">
        <v>1</v>
      </c>
      <c r="C2" s="7">
        <v>-3.91330476531402</v>
      </c>
      <c r="D2" s="7">
        <v>-12.42445937598</v>
      </c>
      <c r="E2" s="7">
        <v>-11.6541527462609</v>
      </c>
      <c r="F2" s="7">
        <v>-11.8139956131822</v>
      </c>
      <c r="G2" s="7">
        <v>-2.80435902337786</v>
      </c>
      <c r="H2" s="7">
        <v>1.4039122591721</v>
      </c>
      <c r="I2" s="7">
        <v>-2.06593957234963</v>
      </c>
      <c r="J2" s="7">
        <v>-9.19591523971849</v>
      </c>
      <c r="K2" s="7">
        <v>-14.2235113908873</v>
      </c>
      <c r="L2" s="7">
        <v>-4.79371059012601</v>
      </c>
      <c r="M2" s="7">
        <v>-5.02187240172952</v>
      </c>
      <c r="N2" s="7">
        <v>0.575659379666831</v>
      </c>
      <c r="O2" s="7">
        <v>-8.84128403260274</v>
      </c>
      <c r="P2" s="7">
        <v>-3.27266016368912</v>
      </c>
      <c r="Q2" s="7">
        <v>-0.853968976480246</v>
      </c>
      <c r="R2" s="7">
        <v>-1.47867471792142</v>
      </c>
      <c r="S2" s="7">
        <v>-7.06125107215712</v>
      </c>
      <c r="T2" s="7">
        <v>-8.35948315079986</v>
      </c>
      <c r="U2" s="7">
        <v>-6.31740394416829</v>
      </c>
      <c r="V2" s="7">
        <v>-8.17230219239673</v>
      </c>
      <c r="W2" s="7">
        <v>-2.46909063961857</v>
      </c>
      <c r="X2" s="7">
        <v>1.47562865349983</v>
      </c>
      <c r="Y2" s="7">
        <v>-6.44233370698294</v>
      </c>
      <c r="Z2" s="7">
        <v>-0.774377437031944</v>
      </c>
      <c r="AA2" s="7">
        <v>-9.22856110074372</v>
      </c>
      <c r="AB2" s="7">
        <v>-14.4592134910204</v>
      </c>
      <c r="AC2" s="7">
        <v>-7.34410360178026</v>
      </c>
      <c r="AD2" s="7">
        <v>-12.8573945986764</v>
      </c>
      <c r="AE2" s="7">
        <v>-0.634700966433229</v>
      </c>
      <c r="AF2" s="7">
        <v>-6.61297120635027</v>
      </c>
      <c r="AG2" s="7">
        <v>-2.17640255221522</v>
      </c>
      <c r="AH2" s="7">
        <v>-2.12227324161722</v>
      </c>
      <c r="AI2" s="7">
        <v>-3.58257867521524</v>
      </c>
      <c r="AJ2" s="7">
        <v>-6.18029582391773</v>
      </c>
      <c r="AK2" s="7">
        <v>-8.9766629691012</v>
      </c>
      <c r="AL2" s="7">
        <v>-6.07357430885941</v>
      </c>
      <c r="AM2" s="7">
        <v>-11.8985055039461</v>
      </c>
      <c r="AN2" s="7">
        <v>-15.4443717880958</v>
      </c>
      <c r="AO2" s="7">
        <v>-10.8325292669974</v>
      </c>
      <c r="AP2" s="7">
        <v>-9.42979883185308</v>
      </c>
      <c r="AQ2" s="7">
        <v>-10.0590955750208</v>
      </c>
      <c r="AR2" s="7">
        <v>-14.4175511630979</v>
      </c>
      <c r="AS2" s="7">
        <v>-5.60332942247169</v>
      </c>
      <c r="AT2" s="7">
        <v>-9.4569719204751</v>
      </c>
      <c r="AU2" s="7">
        <v>-3.55464361461873</v>
      </c>
      <c r="AV2" s="7">
        <v>1.49649468241159</v>
      </c>
      <c r="AW2" s="7">
        <v>2.25768916296056</v>
      </c>
      <c r="AX2" s="7">
        <v>2.89419940275138</v>
      </c>
      <c r="AY2" s="7">
        <v>-11.6280337646526</v>
      </c>
      <c r="AZ2" s="7">
        <v>-17.8816363402311</v>
      </c>
      <c r="BA2" s="7">
        <v>-18.0455051417862</v>
      </c>
      <c r="BB2" s="7">
        <v>-5.85726248481524</v>
      </c>
      <c r="BC2" s="7">
        <v>-13.5726231664548</v>
      </c>
      <c r="BD2" s="7">
        <v>-15.5041867303826</v>
      </c>
      <c r="BE2" s="7">
        <v>-9.54758674545746</v>
      </c>
      <c r="BF2" s="7">
        <v>-23.3856152741205</v>
      </c>
      <c r="BG2" s="7">
        <v>-18.4340169094089</v>
      </c>
      <c r="BH2" s="7">
        <v>-6.34980786013784</v>
      </c>
      <c r="BI2" s="7">
        <v>-7.42501378341785</v>
      </c>
      <c r="BJ2" s="7">
        <v>-6.13041221157573</v>
      </c>
      <c r="BK2" s="7">
        <v>-9.05837307679758</v>
      </c>
      <c r="BL2" s="7">
        <v>-5.20616926649291</v>
      </c>
      <c r="BM2" s="7">
        <v>-16.5952744040269</v>
      </c>
      <c r="BN2" s="7">
        <v>-8.65873111712199</v>
      </c>
      <c r="BO2" s="7">
        <v>-7.27137173941992</v>
      </c>
      <c r="BP2" s="7">
        <v>-14.8081059775905</v>
      </c>
      <c r="BQ2" s="7">
        <v>-4.04056326540467</v>
      </c>
      <c r="BR2" s="7">
        <v>-10.3284828822407</v>
      </c>
      <c r="BS2" s="7">
        <v>-16.3597383082874</v>
      </c>
      <c r="BT2" s="7">
        <v>-5.84839281410177</v>
      </c>
      <c r="BU2" s="7">
        <v>-2.58511036707841</v>
      </c>
      <c r="BV2" s="7">
        <v>3.05243899495554</v>
      </c>
      <c r="BW2" s="7">
        <v>-13.4020916112831</v>
      </c>
      <c r="BX2" s="7">
        <v>-18.327930939382</v>
      </c>
      <c r="BY2" s="7">
        <v>-13.6477356490864</v>
      </c>
      <c r="BZ2" s="7">
        <v>-6.0393647654746</v>
      </c>
      <c r="CA2" s="7">
        <v>-2.73202355116064</v>
      </c>
      <c r="CB2" s="7">
        <v>-12.7522144925297</v>
      </c>
      <c r="CC2" s="7">
        <v>-5.70601466744893</v>
      </c>
      <c r="CD2" s="7">
        <v>-22.7166233659668</v>
      </c>
      <c r="CE2" s="7">
        <v>-16.7390646708732</v>
      </c>
      <c r="CF2" s="7">
        <v>-6.57031697938828</v>
      </c>
      <c r="CG2" s="7">
        <v>-4.26330034114471</v>
      </c>
      <c r="CH2" s="7">
        <v>0.751073637135505</v>
      </c>
      <c r="CI2" s="7">
        <v>-11.4566877775392</v>
      </c>
      <c r="CJ2" s="7">
        <v>-10.0028386285476</v>
      </c>
      <c r="CK2" s="7">
        <v>-14.4360435561325</v>
      </c>
      <c r="CL2" s="7">
        <v>-2.85671392212771</v>
      </c>
      <c r="CM2" s="7">
        <v>-5.66797437157766</v>
      </c>
      <c r="CN2" s="7">
        <v>-20.8534876882213</v>
      </c>
      <c r="CO2" s="7">
        <v>-10.2946765252536</v>
      </c>
      <c r="CP2" s="7">
        <v>-11.1457940933601</v>
      </c>
      <c r="CQ2" s="7">
        <v>-14.4592838526164</v>
      </c>
      <c r="CR2" s="7">
        <v>-4.80753425004059</v>
      </c>
      <c r="CS2" s="7">
        <v>-5.98557542927438</v>
      </c>
      <c r="CT2" s="7">
        <v>-1.83117484071499</v>
      </c>
    </row>
    <row r="3" spans="2:98" ht="15" customHeight="true">
      <c r="B3" s="6">
        <v>2</v>
      </c>
      <c r="C3" s="7">
        <v>-4.04635821800684</v>
      </c>
      <c r="D3" s="7">
        <v>0.000552704454548802</v>
      </c>
      <c r="E3" s="7">
        <v>-7.54457228419551</v>
      </c>
      <c r="F3" s="7">
        <v>-4.33504704636698</v>
      </c>
      <c r="G3" s="7">
        <v>-5.22089720659642</v>
      </c>
      <c r="H3" s="7">
        <v>-3.70544207798594</v>
      </c>
      <c r="I3" s="7">
        <v>-0.903204880773046</v>
      </c>
      <c r="J3" s="7">
        <v>-6.69056102130798</v>
      </c>
      <c r="K3" s="7">
        <v>-6.61605907696458</v>
      </c>
      <c r="L3" s="7">
        <v>-5.16439931215245</v>
      </c>
      <c r="M3" s="7">
        <v>-7.55968981597789</v>
      </c>
      <c r="N3" s="7">
        <v>-3.46269931137658</v>
      </c>
      <c r="O3" s="7">
        <v>-0.303904135935227</v>
      </c>
      <c r="P3" s="7">
        <v>-2.32958744002372</v>
      </c>
      <c r="Q3" s="7">
        <v>-2.31473847757525</v>
      </c>
      <c r="R3" s="7">
        <v>0.111607388706943</v>
      </c>
      <c r="S3" s="7">
        <v>-1.3504481982377</v>
      </c>
      <c r="T3" s="7">
        <v>-2.54159569653257</v>
      </c>
      <c r="U3" s="7">
        <v>-4.18340479203698</v>
      </c>
      <c r="V3" s="7">
        <v>-0.833464631196421</v>
      </c>
      <c r="W3" s="7">
        <v>-4.17191747293691</v>
      </c>
      <c r="X3" s="7">
        <v>-1.49535652962595</v>
      </c>
      <c r="Y3" s="7">
        <v>-9.15766776454484</v>
      </c>
      <c r="Z3" s="7">
        <v>-1.20596100808734</v>
      </c>
      <c r="AA3" s="7">
        <v>-0.584899342904009</v>
      </c>
      <c r="AB3" s="7">
        <v>-2.8923524681536</v>
      </c>
      <c r="AC3" s="7">
        <v>-1.68707602262384</v>
      </c>
      <c r="AD3" s="7">
        <v>-5.52560189122369</v>
      </c>
      <c r="AE3" s="7">
        <v>-1.79365299857091</v>
      </c>
      <c r="AF3" s="7">
        <v>-5.68888556557067</v>
      </c>
      <c r="AG3" s="7">
        <v>-2.18643961755242</v>
      </c>
      <c r="AH3" s="7">
        <v>-5.70702599716469</v>
      </c>
      <c r="AI3" s="7">
        <v>-1.49132442628616</v>
      </c>
      <c r="AJ3" s="7">
        <v>-7.14797884058362</v>
      </c>
      <c r="AK3" s="7">
        <v>-12.5581408412545</v>
      </c>
      <c r="AL3" s="7">
        <v>-8.74178772230698</v>
      </c>
      <c r="AM3" s="7">
        <v>-0.64254212744936</v>
      </c>
      <c r="AN3" s="7">
        <v>-5.55187190033484</v>
      </c>
      <c r="AO3" s="7">
        <v>-5.76642360583901</v>
      </c>
      <c r="AP3" s="7">
        <v>-9.57436792066937</v>
      </c>
      <c r="AQ3" s="7">
        <v>-5.21718883908625</v>
      </c>
      <c r="AR3" s="7">
        <v>-5.83188961142105</v>
      </c>
      <c r="AS3" s="7">
        <v>-3.38776878533326</v>
      </c>
      <c r="AT3" s="7">
        <v>-1.57717007015162</v>
      </c>
      <c r="AU3" s="7">
        <v>-0.0782945135802038</v>
      </c>
      <c r="AV3" s="7">
        <v>-0.725451998591325</v>
      </c>
      <c r="AW3" s="7">
        <v>0.00900400197042472</v>
      </c>
      <c r="AX3" s="7">
        <v>0.689803005843714</v>
      </c>
      <c r="AY3" s="7">
        <v>-6.75466592860175</v>
      </c>
      <c r="AZ3" s="7">
        <v>-9.49732444675556</v>
      </c>
      <c r="BA3" s="7">
        <v>-11.5546276677001</v>
      </c>
      <c r="BB3" s="7">
        <v>-6.10233922852149</v>
      </c>
      <c r="BC3" s="7">
        <v>-4.1420952340145</v>
      </c>
      <c r="BD3" s="7">
        <v>-7.39890650132611</v>
      </c>
      <c r="BE3" s="7">
        <v>-6.31715890323312</v>
      </c>
      <c r="BF3" s="7">
        <v>-14.9766830848671</v>
      </c>
      <c r="BG3" s="7">
        <v>-9.24825764672187</v>
      </c>
      <c r="BH3" s="7">
        <v>-4.9728651952596</v>
      </c>
      <c r="BI3" s="7">
        <v>-3.71504854872001</v>
      </c>
      <c r="BJ3" s="7">
        <v>-5.81479548996185</v>
      </c>
      <c r="BK3" s="7">
        <v>1.19122285109097</v>
      </c>
      <c r="BL3" s="7">
        <v>-4.8585141374233</v>
      </c>
      <c r="BM3" s="7">
        <v>0.351075189513267</v>
      </c>
      <c r="BN3" s="7">
        <v>-5.73613949843684</v>
      </c>
      <c r="BO3" s="7">
        <v>-2.93291568897121</v>
      </c>
      <c r="BP3" s="7">
        <v>-3.82591318485674</v>
      </c>
      <c r="BQ3" s="7">
        <v>-7.69038695349309</v>
      </c>
      <c r="BR3" s="7">
        <v>-9.03153059715942</v>
      </c>
      <c r="BS3" s="7">
        <v>-9.38298715819428</v>
      </c>
      <c r="BT3" s="7">
        <v>-7.69298775600146</v>
      </c>
      <c r="BU3" s="7">
        <v>-3.93273802062822</v>
      </c>
      <c r="BV3" s="7">
        <v>3.36825287418515</v>
      </c>
      <c r="BW3" s="7">
        <v>-3.35864970199191</v>
      </c>
      <c r="BX3" s="7">
        <v>-8.89547101658854</v>
      </c>
      <c r="BY3" s="7">
        <v>-9.54123163509803</v>
      </c>
      <c r="BZ3" s="7">
        <v>-5.36707554913301</v>
      </c>
      <c r="CA3" s="7">
        <v>-6.59906888734349</v>
      </c>
      <c r="CB3" s="7">
        <v>-12.9528192677626</v>
      </c>
      <c r="CC3" s="7">
        <v>-8.1357002132454</v>
      </c>
      <c r="CD3" s="7">
        <v>-9.11602327444234</v>
      </c>
      <c r="CE3" s="7">
        <v>-12.4073059708962</v>
      </c>
      <c r="CF3" s="7">
        <v>-4.88482882730341</v>
      </c>
      <c r="CG3" s="7">
        <v>-1.95806385096739</v>
      </c>
      <c r="CH3" s="7">
        <v>-2.21803240773306</v>
      </c>
      <c r="CI3" s="7">
        <v>-4.85751395307716</v>
      </c>
      <c r="CJ3" s="7">
        <v>-5.20424124992451</v>
      </c>
      <c r="CK3" s="7">
        <v>-6.98708677043487</v>
      </c>
      <c r="CL3" s="7">
        <v>-7.80461035909457</v>
      </c>
      <c r="CM3" s="7">
        <v>-10.2664376809303</v>
      </c>
      <c r="CN3" s="7">
        <v>-10.1694476845673</v>
      </c>
      <c r="CO3" s="7">
        <v>-8.22558924952227</v>
      </c>
      <c r="CP3" s="7">
        <v>-9.9072464690048</v>
      </c>
      <c r="CQ3" s="7">
        <v>-7.09788012252693</v>
      </c>
      <c r="CR3" s="7">
        <v>0.706906638488817</v>
      </c>
      <c r="CS3" s="7">
        <v>-0.716255198290128</v>
      </c>
      <c r="CT3" s="7">
        <v>4.66022263555214</v>
      </c>
    </row>
    <row r="4" spans="2:98" ht="15" customHeight="true">
      <c r="B4" s="6">
        <v>3</v>
      </c>
      <c r="C4" s="7">
        <v>-0.820559954516739</v>
      </c>
      <c r="D4" s="7">
        <v>-0.361822547884003</v>
      </c>
      <c r="E4" s="7">
        <v>-0.114086637457149</v>
      </c>
      <c r="F4" s="7">
        <v>-0.474184893833353</v>
      </c>
      <c r="G4" s="7">
        <v>1.82268121207608</v>
      </c>
      <c r="H4" s="7">
        <v>-0.905230599741572</v>
      </c>
      <c r="I4" s="7">
        <v>-2.24512456656294</v>
      </c>
      <c r="J4" s="7">
        <v>-0.538196559735297</v>
      </c>
      <c r="K4" s="7">
        <v>-0.410503335554949</v>
      </c>
      <c r="L4" s="7">
        <v>-3.85506092146716</v>
      </c>
      <c r="M4" s="7">
        <v>-9.28151730071249</v>
      </c>
      <c r="N4" s="7">
        <v>2.14109338581738</v>
      </c>
      <c r="O4" s="7">
        <v>-3.00602766047359</v>
      </c>
      <c r="P4" s="7">
        <v>4.91216707482363</v>
      </c>
      <c r="Q4" s="7">
        <v>-2.81708198832757</v>
      </c>
      <c r="R4" s="7">
        <v>-0.908622635321535</v>
      </c>
      <c r="S4" s="7">
        <v>3.39215958219575</v>
      </c>
      <c r="T4" s="7">
        <v>-1.54798962532595</v>
      </c>
      <c r="U4" s="7">
        <v>-0.840563171798294</v>
      </c>
      <c r="V4" s="7">
        <v>4.50112342420061</v>
      </c>
      <c r="W4" s="7">
        <v>-0.0884270821234168</v>
      </c>
      <c r="X4" s="7">
        <v>-2.68144449546526</v>
      </c>
      <c r="Y4" s="7">
        <v>-2.21551758948817</v>
      </c>
      <c r="Z4" s="7">
        <v>-2.09491399266517</v>
      </c>
      <c r="AA4" s="7">
        <v>-1.72509379016583</v>
      </c>
      <c r="AB4" s="7">
        <v>1.42132334719645</v>
      </c>
      <c r="AC4" s="7">
        <v>1.78124708028463</v>
      </c>
      <c r="AD4" s="7">
        <v>1.69008257204314</v>
      </c>
      <c r="AE4" s="7">
        <v>-0.418819080501635</v>
      </c>
      <c r="AF4" s="7">
        <v>-2.11391092290251</v>
      </c>
      <c r="AG4" s="7">
        <v>-0.476303507590728</v>
      </c>
      <c r="AH4" s="7">
        <v>2.42179835914567</v>
      </c>
      <c r="AI4" s="7">
        <v>-0.908074412807309</v>
      </c>
      <c r="AJ4" s="7">
        <v>-3.32746497660082</v>
      </c>
      <c r="AK4" s="7">
        <v>-8.16314649819742</v>
      </c>
      <c r="AL4" s="7">
        <v>-4.52216675824775</v>
      </c>
      <c r="AM4" s="7">
        <v>-4.9292884211327</v>
      </c>
      <c r="AN4" s="7">
        <v>-1.52140838764672</v>
      </c>
      <c r="AO4" s="7">
        <v>-0.791588398349177</v>
      </c>
      <c r="AP4" s="7">
        <v>-1.84708612666554</v>
      </c>
      <c r="AQ4" s="7">
        <v>-2.32746229579652</v>
      </c>
      <c r="AR4" s="7">
        <v>-2.58330583595443</v>
      </c>
      <c r="AS4" s="7">
        <v>1.92548531885905</v>
      </c>
      <c r="AT4" s="7">
        <v>-1.68265113811503</v>
      </c>
      <c r="AU4" s="7">
        <v>2.57176448054906</v>
      </c>
      <c r="AV4" s="7">
        <v>-3.8243442966791</v>
      </c>
      <c r="AW4" s="7">
        <v>3.63958125928048</v>
      </c>
      <c r="AX4" s="7">
        <v>0.0877873374270166</v>
      </c>
      <c r="AY4" s="7">
        <v>-2.86262153594043</v>
      </c>
      <c r="AZ4" s="7">
        <v>-6.80371548225639</v>
      </c>
      <c r="BA4" s="7">
        <v>-5.55953259769603</v>
      </c>
      <c r="BB4" s="7">
        <v>-3.91849696687404</v>
      </c>
      <c r="BC4" s="7">
        <v>-5.46529923060734</v>
      </c>
      <c r="BD4" s="7">
        <v>-3.89691102473898</v>
      </c>
      <c r="BE4" s="7">
        <v>-3.47812524871279</v>
      </c>
      <c r="BF4" s="7">
        <v>-8.07476631173859</v>
      </c>
      <c r="BG4" s="7">
        <v>-9.92425150747522</v>
      </c>
      <c r="BH4" s="7">
        <v>-3.0303705417241</v>
      </c>
      <c r="BI4" s="7">
        <v>-4.68580535946603</v>
      </c>
      <c r="BJ4" s="7">
        <v>0.942299603623724</v>
      </c>
      <c r="BK4" s="7">
        <v>-0.938698091239985</v>
      </c>
      <c r="BL4" s="7">
        <v>1.72135505140523</v>
      </c>
      <c r="BM4" s="7">
        <v>-1.35296199779623</v>
      </c>
      <c r="BN4" s="7">
        <v>-3.99224754886109</v>
      </c>
      <c r="BO4" s="7">
        <v>-4.04884935534301</v>
      </c>
      <c r="BP4" s="7">
        <v>-8.5419371216426</v>
      </c>
      <c r="BQ4" s="7">
        <v>-7.53353593649399</v>
      </c>
      <c r="BR4" s="7">
        <v>-6.25072100285615</v>
      </c>
      <c r="BS4" s="7">
        <v>-7.87450164735401</v>
      </c>
      <c r="BT4" s="7">
        <v>1.49426399633148</v>
      </c>
      <c r="BU4" s="7">
        <v>-2.36691677140152</v>
      </c>
      <c r="BV4" s="7">
        <v>2.05849084097326</v>
      </c>
      <c r="BW4" s="7">
        <v>-1.89190965175612</v>
      </c>
      <c r="BX4" s="7">
        <v>-3.48801822450196</v>
      </c>
      <c r="BY4" s="7">
        <v>-4.17305663846446</v>
      </c>
      <c r="BZ4" s="7">
        <v>-2.09770663514246</v>
      </c>
      <c r="CA4" s="7">
        <v>-4.24706386349635</v>
      </c>
      <c r="CB4" s="7">
        <v>-10.6207547804265</v>
      </c>
      <c r="CC4" s="7">
        <v>-5.76182742593846</v>
      </c>
      <c r="CD4" s="7">
        <v>-11.1771548536622</v>
      </c>
      <c r="CE4" s="7">
        <v>-7.2994364305373</v>
      </c>
      <c r="CF4" s="7">
        <v>0.724616502936897</v>
      </c>
      <c r="CG4" s="7">
        <v>-4.22987476047228</v>
      </c>
      <c r="CH4" s="7">
        <v>-0.960919657753493</v>
      </c>
      <c r="CI4" s="7">
        <v>0.511113218392893</v>
      </c>
      <c r="CJ4" s="7">
        <v>2.12696504854375</v>
      </c>
      <c r="CK4" s="7">
        <v>-1.18972554621359</v>
      </c>
      <c r="CL4" s="7">
        <v>-4.38295758080767</v>
      </c>
      <c r="CM4" s="7">
        <v>-1.82515108726284</v>
      </c>
      <c r="CN4" s="7">
        <v>-7.57779154844411</v>
      </c>
      <c r="CO4" s="7">
        <v>-1.23759048906322</v>
      </c>
      <c r="CP4" s="7">
        <v>-6.18918450298452</v>
      </c>
      <c r="CQ4" s="7">
        <v>-4.60067734608992</v>
      </c>
      <c r="CR4" s="7">
        <v>2.02494113954117</v>
      </c>
      <c r="CS4" s="7">
        <v>-2.14892290012131</v>
      </c>
      <c r="CT4" s="7">
        <v>-4.24703971191184</v>
      </c>
    </row>
    <row r="5" spans="2:98" ht="15" customHeight="true">
      <c r="B5" s="6">
        <v>4</v>
      </c>
      <c r="C5" s="7">
        <v>3.89866515518452</v>
      </c>
      <c r="D5" s="7">
        <v>-1.77706382228462</v>
      </c>
      <c r="E5" s="7">
        <v>-0.517969850934605</v>
      </c>
      <c r="F5" s="7">
        <v>0.537699323031575</v>
      </c>
      <c r="G5" s="7">
        <v>4.1657044652643</v>
      </c>
      <c r="H5" s="7">
        <v>0.200609365294895</v>
      </c>
      <c r="I5" s="7">
        <v>-0.665199615212259</v>
      </c>
      <c r="J5" s="7">
        <v>1.1263105583198</v>
      </c>
      <c r="K5" s="7">
        <v>2.06557205517584</v>
      </c>
      <c r="L5" s="7">
        <v>-5.89312103344537</v>
      </c>
      <c r="M5" s="7">
        <v>1.96499859376854</v>
      </c>
      <c r="N5" s="7">
        <v>-0.626532984852474</v>
      </c>
      <c r="O5" s="7">
        <v>5.47683999027822</v>
      </c>
      <c r="P5" s="7">
        <v>6.53667586816391</v>
      </c>
      <c r="Q5" s="7">
        <v>6.09521859707002</v>
      </c>
      <c r="R5" s="7">
        <v>0.0372170597361219</v>
      </c>
      <c r="S5" s="7">
        <v>-1.11625799119338</v>
      </c>
      <c r="T5" s="7">
        <v>1.61878450850918</v>
      </c>
      <c r="U5" s="7">
        <v>3.12853821535418</v>
      </c>
      <c r="V5" s="7">
        <v>-0.989513480252299</v>
      </c>
      <c r="W5" s="7">
        <v>-0.204395735297112</v>
      </c>
      <c r="X5" s="7">
        <v>-2.11291830306118</v>
      </c>
      <c r="Y5" s="7">
        <v>-4.55137421363906</v>
      </c>
      <c r="Z5" s="7">
        <v>-3.31449994566583</v>
      </c>
      <c r="AA5" s="7">
        <v>3.83374453913666</v>
      </c>
      <c r="AB5" s="7">
        <v>1.22030502746156</v>
      </c>
      <c r="AC5" s="7">
        <v>6.20384950832067</v>
      </c>
      <c r="AD5" s="7">
        <v>-0.803816842361357</v>
      </c>
      <c r="AE5" s="7">
        <v>4.42789186964637</v>
      </c>
      <c r="AF5" s="7">
        <v>-0.351872250002998</v>
      </c>
      <c r="AG5" s="7">
        <v>0.824045094289886</v>
      </c>
      <c r="AH5" s="7">
        <v>0.226278996446581</v>
      </c>
      <c r="AI5" s="7">
        <v>5.86290289872204</v>
      </c>
      <c r="AJ5" s="7">
        <v>0.385812922888363</v>
      </c>
      <c r="AK5" s="7">
        <v>-4.63717871030531</v>
      </c>
      <c r="AL5" s="7">
        <v>-4.16123887011236</v>
      </c>
      <c r="AM5" s="7">
        <v>3.4781856620325</v>
      </c>
      <c r="AN5" s="7">
        <v>3.46408132333318</v>
      </c>
      <c r="AO5" s="7">
        <v>2.89553346273124</v>
      </c>
      <c r="AP5" s="7">
        <v>5.41754899687339</v>
      </c>
      <c r="AQ5" s="7">
        <v>3.3008378631348</v>
      </c>
      <c r="AR5" s="7">
        <v>2.5777792732847</v>
      </c>
      <c r="AS5" s="7">
        <v>-0.463895415947718</v>
      </c>
      <c r="AT5" s="7">
        <v>1.3687577150049</v>
      </c>
      <c r="AU5" s="7">
        <v>-0.629466391206734</v>
      </c>
      <c r="AV5" s="7">
        <v>1.18090691365205</v>
      </c>
      <c r="AW5" s="7">
        <v>-6.12582214176246</v>
      </c>
      <c r="AX5" s="7">
        <v>5.39726804724933</v>
      </c>
      <c r="AY5" s="7">
        <v>1.24898731255735</v>
      </c>
      <c r="AZ5" s="7">
        <v>-0.506372433841989</v>
      </c>
      <c r="BA5" s="7">
        <v>-3.14937677306852</v>
      </c>
      <c r="BB5" s="7">
        <v>-4.38747640424072</v>
      </c>
      <c r="BC5" s="7">
        <v>-0.49613867838525</v>
      </c>
      <c r="BD5" s="7">
        <v>-8.31981383350967</v>
      </c>
      <c r="BE5" s="7">
        <v>-4.13101696034982</v>
      </c>
      <c r="BF5" s="7">
        <v>-6.63279861149658</v>
      </c>
      <c r="BG5" s="7">
        <v>-0.0959463936364955</v>
      </c>
      <c r="BH5" s="7">
        <v>0.327010822866214</v>
      </c>
      <c r="BI5" s="7">
        <v>0.912104638482106</v>
      </c>
      <c r="BJ5" s="7">
        <v>-2.32409884076333</v>
      </c>
      <c r="BK5" s="7">
        <v>4.69304890197282</v>
      </c>
      <c r="BL5" s="7">
        <v>-1.3816220441463</v>
      </c>
      <c r="BM5" s="7">
        <v>-0.00431506768427425</v>
      </c>
      <c r="BN5" s="7">
        <v>-1.39893430380926</v>
      </c>
      <c r="BO5" s="7">
        <v>0.379916995842905</v>
      </c>
      <c r="BP5" s="7">
        <v>-0.696406997361919</v>
      </c>
      <c r="BQ5" s="7">
        <v>-4.2971654936614</v>
      </c>
      <c r="BR5" s="7">
        <v>-3.09286452902688</v>
      </c>
      <c r="BS5" s="7">
        <v>-0.0738917317430605</v>
      </c>
      <c r="BT5" s="7">
        <v>2.36291079498824</v>
      </c>
      <c r="BU5" s="7">
        <v>0.441931488869159</v>
      </c>
      <c r="BV5" s="7">
        <v>6.58383848929361</v>
      </c>
      <c r="BW5" s="7">
        <v>0.700491378559036</v>
      </c>
      <c r="BX5" s="7">
        <v>2.41495585825214</v>
      </c>
      <c r="BY5" s="7">
        <v>0.182431607743638</v>
      </c>
      <c r="BZ5" s="7">
        <v>-2.68610146882293</v>
      </c>
      <c r="CA5" s="7">
        <v>0.0181866711523071</v>
      </c>
      <c r="CB5" s="7">
        <v>-4.725016309279</v>
      </c>
      <c r="CC5" s="7">
        <v>-2.70888925214513</v>
      </c>
      <c r="CD5" s="7">
        <v>-0.0314902227200946</v>
      </c>
      <c r="CE5" s="7">
        <v>-2.1165546791126</v>
      </c>
      <c r="CF5" s="7">
        <v>-1.35443909221067</v>
      </c>
      <c r="CG5" s="7">
        <v>-3.21205809429375</v>
      </c>
      <c r="CH5" s="7">
        <v>1.41975680494534</v>
      </c>
      <c r="CI5" s="7">
        <v>-3.18779960090706</v>
      </c>
      <c r="CJ5" s="7">
        <v>-4.39547243255129</v>
      </c>
      <c r="CK5" s="7">
        <v>-0.31368933822796</v>
      </c>
      <c r="CL5" s="7">
        <v>1.85682587941483</v>
      </c>
      <c r="CM5" s="7">
        <v>-0.29943610989676</v>
      </c>
      <c r="CN5" s="7">
        <v>-1.51160739711349</v>
      </c>
      <c r="CO5" s="7">
        <v>0.37032026496172</v>
      </c>
      <c r="CP5" s="7">
        <v>-1.60754523343485</v>
      </c>
      <c r="CQ5" s="7">
        <v>-1.37256140704812</v>
      </c>
      <c r="CR5" s="7">
        <v>-0.779017739373103</v>
      </c>
      <c r="CS5" s="7">
        <v>-2.39087395854995</v>
      </c>
      <c r="CT5" s="7">
        <v>-0.984015901476596</v>
      </c>
    </row>
    <row r="6" spans="2:98" ht="15" customHeight="true">
      <c r="B6" s="6">
        <v>5</v>
      </c>
      <c r="C6" s="7">
        <v>0.931216562758891</v>
      </c>
      <c r="D6" s="7">
        <v>3.06668356618047</v>
      </c>
      <c r="E6" s="7">
        <v>1.40144043575265</v>
      </c>
      <c r="F6" s="7">
        <v>1.3665523378927</v>
      </c>
      <c r="G6" s="7">
        <v>-0.7678622715448</v>
      </c>
      <c r="H6" s="7">
        <v>3.4063082609182</v>
      </c>
      <c r="I6" s="7">
        <v>2.92402653636236</v>
      </c>
      <c r="J6" s="7">
        <v>2.1095707355239</v>
      </c>
      <c r="K6" s="7">
        <v>1.1080206118022</v>
      </c>
      <c r="L6" s="7">
        <v>1.38292396385395</v>
      </c>
      <c r="M6" s="7">
        <v>2.22263563383694</v>
      </c>
      <c r="N6" s="7">
        <v>-6.19915468129466</v>
      </c>
      <c r="O6" s="7">
        <v>-0.518443910385486</v>
      </c>
      <c r="P6" s="7">
        <v>-4.75809193806799</v>
      </c>
      <c r="Q6" s="7">
        <v>7.95316901057231</v>
      </c>
      <c r="R6" s="7">
        <v>3.44967986455958</v>
      </c>
      <c r="S6" s="7">
        <v>-0.336806166669703</v>
      </c>
      <c r="T6" s="7">
        <v>-1.54791767987945</v>
      </c>
      <c r="U6" s="7">
        <v>-0.180396936566012</v>
      </c>
      <c r="V6" s="7">
        <v>-1.44124679513425</v>
      </c>
      <c r="W6" s="7">
        <v>2.25066911670137</v>
      </c>
      <c r="X6" s="7">
        <v>0.13585201457272</v>
      </c>
      <c r="Y6" s="7">
        <v>-3.18645457743241</v>
      </c>
      <c r="Z6" s="7">
        <v>-2.25197809315841</v>
      </c>
      <c r="AA6" s="7">
        <v>1.57766506969392</v>
      </c>
      <c r="AB6" s="7">
        <v>0.824587490466911</v>
      </c>
      <c r="AC6" s="7">
        <v>0.55420569759508</v>
      </c>
      <c r="AD6" s="7">
        <v>3.65585693636149</v>
      </c>
      <c r="AE6" s="7">
        <v>0.961217468030554</v>
      </c>
      <c r="AF6" s="7">
        <v>2.29071451405071</v>
      </c>
      <c r="AG6" s="7">
        <v>-0.15585841719485</v>
      </c>
      <c r="AH6" s="7">
        <v>3.08134209160562</v>
      </c>
      <c r="AI6" s="7">
        <v>2.73245461262013</v>
      </c>
      <c r="AJ6" s="7">
        <v>-1.09442686556804</v>
      </c>
      <c r="AK6" s="7">
        <v>4.12359366021064</v>
      </c>
      <c r="AL6" s="7">
        <v>-2.49997820312865</v>
      </c>
      <c r="AM6" s="7">
        <v>2.14146151277646</v>
      </c>
      <c r="AN6" s="7">
        <v>6.7193847611843</v>
      </c>
      <c r="AO6" s="7">
        <v>-0.0674434503666816</v>
      </c>
      <c r="AP6" s="7">
        <v>-1.88845551926852</v>
      </c>
      <c r="AQ6" s="7">
        <v>0.627435693023472</v>
      </c>
      <c r="AR6" s="7">
        <v>1.91624493503014</v>
      </c>
      <c r="AS6" s="7">
        <v>1.76553784037014</v>
      </c>
      <c r="AT6" s="7">
        <v>3.04530837852508</v>
      </c>
      <c r="AU6" s="7">
        <v>1.42895500211398</v>
      </c>
      <c r="AV6" s="7">
        <v>-0.332319292775992</v>
      </c>
      <c r="AW6" s="7">
        <v>2.31617111970172</v>
      </c>
      <c r="AX6" s="7">
        <v>-2.25030603299365</v>
      </c>
      <c r="AY6" s="7">
        <v>4.48246553401805</v>
      </c>
      <c r="AZ6" s="7">
        <v>0.861071326915408</v>
      </c>
      <c r="BA6" s="7">
        <v>2.27988026485764</v>
      </c>
      <c r="BB6" s="7">
        <v>1.75663981171874</v>
      </c>
      <c r="BC6" s="7">
        <v>2.04918931390012</v>
      </c>
      <c r="BD6" s="7">
        <v>6.50151773342486</v>
      </c>
      <c r="BE6" s="7">
        <v>1.73618204312015</v>
      </c>
      <c r="BF6" s="7">
        <v>1.72405041101274</v>
      </c>
      <c r="BG6" s="7">
        <v>-0.183181224969303</v>
      </c>
      <c r="BH6" s="7">
        <v>-1.73231862095236</v>
      </c>
      <c r="BI6" s="7">
        <v>-3.27291071567333</v>
      </c>
      <c r="BJ6" s="7">
        <v>-6.50734818114142</v>
      </c>
      <c r="BK6" s="7">
        <v>-0.259798756629607</v>
      </c>
      <c r="BL6" s="7">
        <v>4.98747994668929</v>
      </c>
      <c r="BM6" s="7">
        <v>1.63372095089016</v>
      </c>
      <c r="BN6" s="7">
        <v>-2.25358917049698</v>
      </c>
      <c r="BO6" s="7">
        <v>-0.619908165704146</v>
      </c>
      <c r="BP6" s="7">
        <v>1.15662885810707</v>
      </c>
      <c r="BQ6" s="7">
        <v>-1.02163165976026</v>
      </c>
      <c r="BR6" s="7">
        <v>-2.60952918986004</v>
      </c>
      <c r="BS6" s="7">
        <v>-0.547710598190861</v>
      </c>
      <c r="BT6" s="7">
        <v>-3.94063600635218</v>
      </c>
      <c r="BU6" s="7">
        <v>-1.82372282336792</v>
      </c>
      <c r="BV6" s="7">
        <v>-4.9183588967303</v>
      </c>
      <c r="BW6" s="7">
        <v>-1.57251875073098</v>
      </c>
      <c r="BX6" s="7">
        <v>0.200986910906977</v>
      </c>
      <c r="BY6" s="7">
        <v>2.02015393766987</v>
      </c>
      <c r="BZ6" s="7">
        <v>2.14407943283459</v>
      </c>
      <c r="CA6" s="7">
        <v>-1.27779991042507</v>
      </c>
      <c r="CB6" s="7">
        <v>0.62318320801478</v>
      </c>
      <c r="CC6" s="7">
        <v>1.87951023119604</v>
      </c>
      <c r="CD6" s="7">
        <v>0.0841938884527735</v>
      </c>
      <c r="CE6" s="7">
        <v>2.32107400933955</v>
      </c>
      <c r="CF6" s="7">
        <v>-3.4590965275429</v>
      </c>
      <c r="CG6" s="7">
        <v>3.61808604124826</v>
      </c>
      <c r="CH6" s="7">
        <v>-1.61408812942727</v>
      </c>
      <c r="CI6" s="7">
        <v>3.24198224199472</v>
      </c>
      <c r="CJ6" s="7">
        <v>-1.30272045444235</v>
      </c>
      <c r="CK6" s="7">
        <v>-4.5651916236834</v>
      </c>
      <c r="CL6" s="7">
        <v>3.00801429576359</v>
      </c>
      <c r="CM6" s="7">
        <v>-0.910373232629354</v>
      </c>
      <c r="CN6" s="7">
        <v>2.81025474738226</v>
      </c>
      <c r="CO6" s="7">
        <v>-1.65398863440305</v>
      </c>
      <c r="CP6" s="7">
        <v>-0.645233096251104</v>
      </c>
      <c r="CQ6" s="7">
        <v>-4.67457761962169</v>
      </c>
      <c r="CR6" s="7">
        <v>-1.53500071998997</v>
      </c>
      <c r="CS6" s="7">
        <v>-4.07392635006363</v>
      </c>
      <c r="CT6" s="7">
        <v>0.325593242311243</v>
      </c>
    </row>
    <row r="7" spans="2:98" ht="15" customHeight="true">
      <c r="B7" s="6">
        <v>6</v>
      </c>
      <c r="C7" s="7">
        <v>1.32505910865893</v>
      </c>
      <c r="D7" s="7">
        <v>3.92461853184477</v>
      </c>
      <c r="E7" s="7">
        <v>1.64348006260388</v>
      </c>
      <c r="F7" s="7">
        <v>2.47285371359703</v>
      </c>
      <c r="G7" s="7">
        <v>0.51639107432311</v>
      </c>
      <c r="H7" s="7">
        <v>-0.312145876162958</v>
      </c>
      <c r="I7" s="7">
        <v>-1.99872945179959</v>
      </c>
      <c r="J7" s="7">
        <v>2.5308442705923</v>
      </c>
      <c r="K7" s="7">
        <v>-0.0844209490073808</v>
      </c>
      <c r="L7" s="7">
        <v>-0.769805413301583</v>
      </c>
      <c r="M7" s="7">
        <v>0.171765921626502</v>
      </c>
      <c r="N7" s="7">
        <v>-0.347116134770204</v>
      </c>
      <c r="O7" s="7">
        <v>-0.25693304182505</v>
      </c>
      <c r="P7" s="7">
        <v>2.95630811248884</v>
      </c>
      <c r="Q7" s="7">
        <v>0.721882171734251</v>
      </c>
      <c r="R7" s="7">
        <v>5.22369439237446</v>
      </c>
      <c r="S7" s="7">
        <v>2.28134547171385</v>
      </c>
      <c r="T7" s="7">
        <v>1.67456070928074</v>
      </c>
      <c r="U7" s="7">
        <v>3.84439893124045</v>
      </c>
      <c r="V7" s="7">
        <v>2.96119990052284</v>
      </c>
      <c r="W7" s="7">
        <v>1.93995038837693</v>
      </c>
      <c r="X7" s="7">
        <v>-1.84973599703517</v>
      </c>
      <c r="Y7" s="7">
        <v>-0.534105519390778</v>
      </c>
      <c r="Z7" s="7">
        <v>-1.80307476696453</v>
      </c>
      <c r="AA7" s="7">
        <v>0.9230176361134</v>
      </c>
      <c r="AB7" s="7">
        <v>2.60615004805413</v>
      </c>
      <c r="AC7" s="7">
        <v>5.32169514509678</v>
      </c>
      <c r="AD7" s="7">
        <v>-2.11371599193762</v>
      </c>
      <c r="AE7" s="7">
        <v>1.87631309275503</v>
      </c>
      <c r="AF7" s="7">
        <v>3.66286986524256</v>
      </c>
      <c r="AG7" s="7">
        <v>3.23287009926298</v>
      </c>
      <c r="AH7" s="7">
        <v>0.455968291196314</v>
      </c>
      <c r="AI7" s="7">
        <v>3.23685638622692</v>
      </c>
      <c r="AJ7" s="7">
        <v>-3.67576143165888</v>
      </c>
      <c r="AK7" s="7">
        <v>-5.01816528745621</v>
      </c>
      <c r="AL7" s="7">
        <v>-2.42534793438881</v>
      </c>
      <c r="AM7" s="7">
        <v>6.19655128755085</v>
      </c>
      <c r="AN7" s="7">
        <v>-1.59264203654129</v>
      </c>
      <c r="AO7" s="7">
        <v>3.70120953714604</v>
      </c>
      <c r="AP7" s="7">
        <v>2.57292536127034</v>
      </c>
      <c r="AQ7" s="7">
        <v>0.880152026896667</v>
      </c>
      <c r="AR7" s="7">
        <v>4.32566374047201</v>
      </c>
      <c r="AS7" s="7">
        <v>-1.68383527697915</v>
      </c>
      <c r="AT7" s="7">
        <v>1.15513264231595</v>
      </c>
      <c r="AU7" s="7">
        <v>2.48025825368677</v>
      </c>
      <c r="AV7" s="7">
        <v>4.26761083163728</v>
      </c>
      <c r="AW7" s="7">
        <v>3.33577548708627</v>
      </c>
      <c r="AX7" s="7">
        <v>-1.14769373657509</v>
      </c>
      <c r="AY7" s="7">
        <v>0.70052250506069</v>
      </c>
      <c r="AZ7" s="7">
        <v>2.97641951394371</v>
      </c>
      <c r="BA7" s="7">
        <v>2.03157329061878</v>
      </c>
      <c r="BB7" s="7">
        <v>0.385445652272665</v>
      </c>
      <c r="BC7" s="7">
        <v>3.440402062251</v>
      </c>
      <c r="BD7" s="7">
        <v>2.68559080218165</v>
      </c>
      <c r="BE7" s="7">
        <v>1.5707030393155</v>
      </c>
      <c r="BF7" s="7">
        <v>1.0707525021453</v>
      </c>
      <c r="BG7" s="7">
        <v>-1.1741011289896</v>
      </c>
      <c r="BH7" s="7">
        <v>-0.02614301885842</v>
      </c>
      <c r="BI7" s="7">
        <v>-4.12611454008265</v>
      </c>
      <c r="BJ7" s="7">
        <v>-1.02239736255524</v>
      </c>
      <c r="BK7" s="7">
        <v>0.875947289682699</v>
      </c>
      <c r="BL7" s="7">
        <v>-2.57250117139893</v>
      </c>
      <c r="BM7" s="7">
        <v>-4.11065542478127</v>
      </c>
      <c r="BN7" s="7">
        <v>0.355520042913213</v>
      </c>
      <c r="BO7" s="7">
        <v>-0.844827249262835</v>
      </c>
      <c r="BP7" s="7">
        <v>-0.452408206655491</v>
      </c>
      <c r="BQ7" s="7">
        <v>3.76576160874083</v>
      </c>
      <c r="BR7" s="7">
        <v>-1.65186969038177</v>
      </c>
      <c r="BS7" s="7">
        <v>2.07521641394578</v>
      </c>
      <c r="BT7" s="7">
        <v>-1.84910910308781</v>
      </c>
      <c r="BU7" s="7">
        <v>2.22140663723712</v>
      </c>
      <c r="BV7" s="7">
        <v>3.1636431397078</v>
      </c>
      <c r="BW7" s="7">
        <v>1.83614966147206</v>
      </c>
      <c r="BX7" s="7">
        <v>0.912198746620561</v>
      </c>
      <c r="BY7" s="7">
        <v>5.77424633784358</v>
      </c>
      <c r="BZ7" s="7">
        <v>-0.422053648806013</v>
      </c>
      <c r="CA7" s="7">
        <v>1.38914324146253</v>
      </c>
      <c r="CB7" s="7">
        <v>5.31579581537289</v>
      </c>
      <c r="CC7" s="7">
        <v>0.841940627234635</v>
      </c>
      <c r="CD7" s="7">
        <v>4.25480000405423</v>
      </c>
      <c r="CE7" s="7">
        <v>0.122703524171357</v>
      </c>
      <c r="CF7" s="7">
        <v>0.0380599476497991</v>
      </c>
      <c r="CG7" s="7">
        <v>1.6999096045065</v>
      </c>
      <c r="CH7" s="7">
        <v>3.40713176774534</v>
      </c>
      <c r="CI7" s="7">
        <v>1.59252750183396</v>
      </c>
      <c r="CJ7" s="7">
        <v>-1.82804107940046</v>
      </c>
      <c r="CK7" s="7">
        <v>-0.459557686223889</v>
      </c>
      <c r="CL7" s="7">
        <v>2.98025901501296</v>
      </c>
      <c r="CM7" s="7">
        <v>1.19575341703967</v>
      </c>
      <c r="CN7" s="7">
        <v>-1.94400160026453</v>
      </c>
      <c r="CO7" s="7">
        <v>-0.987036085959971</v>
      </c>
      <c r="CP7" s="7">
        <v>2.25946175798254</v>
      </c>
      <c r="CQ7" s="7">
        <v>1.60085115949551</v>
      </c>
      <c r="CR7" s="7">
        <v>-1.50298430170506</v>
      </c>
      <c r="CS7" s="7">
        <v>-1.19099163830106</v>
      </c>
      <c r="CT7" s="7">
        <v>0.128148368024085</v>
      </c>
    </row>
    <row r="8" spans="2:98" ht="15" customHeight="true">
      <c r="B8" s="6">
        <v>7</v>
      </c>
      <c r="C8" s="7">
        <v>0.809433572697344</v>
      </c>
      <c r="D8" s="7">
        <v>-0.546986277933684</v>
      </c>
      <c r="E8" s="7">
        <v>1.52872693039535</v>
      </c>
      <c r="F8" s="7">
        <v>2.17291763270259</v>
      </c>
      <c r="G8" s="7">
        <v>-0.785922886267599</v>
      </c>
      <c r="H8" s="7">
        <v>3.94180000214146</v>
      </c>
      <c r="I8" s="7">
        <v>5.64231008365232</v>
      </c>
      <c r="J8" s="7">
        <v>1.09907568986364</v>
      </c>
      <c r="K8" s="7">
        <v>7.00928680522475</v>
      </c>
      <c r="L8" s="7">
        <v>4.94400549972488</v>
      </c>
      <c r="M8" s="7">
        <v>-3.39038065340264</v>
      </c>
      <c r="N8" s="7">
        <v>1.68713178514463</v>
      </c>
      <c r="O8" s="7">
        <v>2.71728304459475</v>
      </c>
      <c r="P8" s="7">
        <v>-1.66381172569936</v>
      </c>
      <c r="Q8" s="7">
        <v>0.885663907975413</v>
      </c>
      <c r="R8" s="7">
        <v>-1.0318225363917</v>
      </c>
      <c r="S8" s="7">
        <v>-0.246209737097161</v>
      </c>
      <c r="T8" s="7">
        <v>0.198870167208497</v>
      </c>
      <c r="U8" s="7">
        <v>-2.08960823573489</v>
      </c>
      <c r="V8" s="7">
        <v>-3.04053479742834</v>
      </c>
      <c r="W8" s="7">
        <v>-0.970259673491455</v>
      </c>
      <c r="X8" s="7">
        <v>-2.89505873753251</v>
      </c>
      <c r="Y8" s="7">
        <v>-1.45325347239168</v>
      </c>
      <c r="Z8" s="7">
        <v>1.72542534125023</v>
      </c>
      <c r="AA8" s="7">
        <v>2.38967134434097</v>
      </c>
      <c r="AB8" s="7">
        <v>-2.15945155173949</v>
      </c>
      <c r="AC8" s="7">
        <v>1.1259860252776</v>
      </c>
      <c r="AD8" s="7">
        <v>2.44819249275361</v>
      </c>
      <c r="AE8" s="7">
        <v>0.0729233170982298</v>
      </c>
      <c r="AF8" s="7">
        <v>3.64020164299791</v>
      </c>
      <c r="AG8" s="7">
        <v>0.873762303381227</v>
      </c>
      <c r="AH8" s="7">
        <v>-1.50444894212296</v>
      </c>
      <c r="AI8" s="7">
        <v>-1.53492224555703</v>
      </c>
      <c r="AJ8" s="7">
        <v>0.129026826206882</v>
      </c>
      <c r="AK8" s="7">
        <v>1.84039255712423</v>
      </c>
      <c r="AL8" s="7">
        <v>-4.43907360674348</v>
      </c>
      <c r="AM8" s="7">
        <v>2.64143569640191</v>
      </c>
      <c r="AN8" s="7">
        <v>1.56969014756851</v>
      </c>
      <c r="AO8" s="7">
        <v>-0.469174291704348</v>
      </c>
      <c r="AP8" s="7">
        <v>-0.944634244909139</v>
      </c>
      <c r="AQ8" s="7">
        <v>-0.875436238050497</v>
      </c>
      <c r="AR8" s="7">
        <v>1.2094126052325</v>
      </c>
      <c r="AS8" s="7">
        <v>6.36702461334335</v>
      </c>
      <c r="AT8" s="7">
        <v>0.954988642946319</v>
      </c>
      <c r="AU8" s="7">
        <v>-0.0930568387952917</v>
      </c>
      <c r="AV8" s="7">
        <v>0.471288084337175</v>
      </c>
      <c r="AW8" s="7">
        <v>0.0759002761587908</v>
      </c>
      <c r="AX8" s="7">
        <v>-3.49833206743096</v>
      </c>
      <c r="AY8" s="7">
        <v>-1.05063699263474</v>
      </c>
      <c r="AZ8" s="7">
        <v>2.26978513072436</v>
      </c>
      <c r="BA8" s="7">
        <v>4.11486401263846</v>
      </c>
      <c r="BB8" s="7">
        <v>1.56949353270102</v>
      </c>
      <c r="BC8" s="7">
        <v>1.78647457087664</v>
      </c>
      <c r="BD8" s="7">
        <v>4.65065815764547</v>
      </c>
      <c r="BE8" s="7">
        <v>4.23652664145584</v>
      </c>
      <c r="BF8" s="7">
        <v>0.637717772995074</v>
      </c>
      <c r="BG8" s="7">
        <v>-2.15500689887767</v>
      </c>
      <c r="BH8" s="7">
        <v>-1.11603354126146</v>
      </c>
      <c r="BI8" s="7">
        <v>-1.08514809051394</v>
      </c>
      <c r="BJ8" s="7">
        <v>-0.130659984033628</v>
      </c>
      <c r="BK8" s="7">
        <v>0.985901332950561</v>
      </c>
      <c r="BL8" s="7">
        <v>-0.665028276582234</v>
      </c>
      <c r="BM8" s="7">
        <v>3.28499288904732</v>
      </c>
      <c r="BN8" s="7">
        <v>4.12897552561708</v>
      </c>
      <c r="BO8" s="7">
        <v>1.23629950525901</v>
      </c>
      <c r="BP8" s="7">
        <v>1.66226298640095</v>
      </c>
      <c r="BQ8" s="7">
        <v>3.24970225620655</v>
      </c>
      <c r="BR8" s="7">
        <v>0.23383914625083</v>
      </c>
      <c r="BS8" s="7">
        <v>-0.85355715957121</v>
      </c>
      <c r="BT8" s="7">
        <v>-4.37779189932962</v>
      </c>
      <c r="BU8" s="7">
        <v>-2.45925925123447</v>
      </c>
      <c r="BV8" s="7">
        <v>-0.588096161582143</v>
      </c>
      <c r="BW8" s="7">
        <v>1.42500189366046</v>
      </c>
      <c r="BX8" s="7">
        <v>1.47712929184081</v>
      </c>
      <c r="BY8" s="7">
        <v>4.3847577746983</v>
      </c>
      <c r="BZ8" s="7">
        <v>-0.0145435462391106</v>
      </c>
      <c r="CA8" s="7">
        <v>4.70812978576078</v>
      </c>
      <c r="CB8" s="7">
        <v>3.64315625064774</v>
      </c>
      <c r="CC8" s="7">
        <v>1.58593450465423</v>
      </c>
      <c r="CD8" s="7">
        <v>-0.81177073200115</v>
      </c>
      <c r="CE8" s="7">
        <v>0.964179534565574</v>
      </c>
      <c r="CF8" s="7">
        <v>-1.39920442547964</v>
      </c>
      <c r="CG8" s="7">
        <v>-1.28367690844243</v>
      </c>
      <c r="CH8" s="7">
        <v>1.00077795322386</v>
      </c>
      <c r="CI8" s="7">
        <v>0.557397826780289</v>
      </c>
      <c r="CJ8" s="7">
        <v>1.9722106461968</v>
      </c>
      <c r="CK8" s="7">
        <v>-0.921379516858451</v>
      </c>
      <c r="CL8" s="7">
        <v>-1.03791411151906</v>
      </c>
      <c r="CM8" s="7">
        <v>-0.0598728761001439</v>
      </c>
      <c r="CN8" s="7">
        <v>2.0096459265219</v>
      </c>
      <c r="CO8" s="7">
        <v>2.1809353293811</v>
      </c>
      <c r="CP8" s="7">
        <v>1.00315569094528</v>
      </c>
      <c r="CQ8" s="7">
        <v>-1.62497075080455</v>
      </c>
      <c r="CR8" s="7">
        <v>-3.45462698167512</v>
      </c>
      <c r="CS8" s="7">
        <v>0.377311464215381</v>
      </c>
      <c r="CT8" s="7">
        <v>-1.68596610395207</v>
      </c>
    </row>
    <row r="9" spans="2:98" ht="15" customHeight="true">
      <c r="B9" s="6">
        <v>8</v>
      </c>
      <c r="C9" s="7">
        <v>-0.425154518706677</v>
      </c>
      <c r="D9" s="7">
        <v>4.48002571127154</v>
      </c>
      <c r="E9" s="7">
        <v>5.33700383905307</v>
      </c>
      <c r="F9" s="7">
        <v>6.84448616029294</v>
      </c>
      <c r="G9" s="7">
        <v>2.73988752502828</v>
      </c>
      <c r="H9" s="7">
        <v>1.80921768576991</v>
      </c>
      <c r="I9" s="7">
        <v>7.26357134600494</v>
      </c>
      <c r="J9" s="7">
        <v>-1.01296186495392</v>
      </c>
      <c r="K9" s="7">
        <v>-0.716155763487222</v>
      </c>
      <c r="L9" s="7">
        <v>-1.21180879944814</v>
      </c>
      <c r="M9" s="7">
        <v>5.6289106053141</v>
      </c>
      <c r="N9" s="7">
        <v>0.573705327426978</v>
      </c>
      <c r="O9" s="7">
        <v>2.63635912080235</v>
      </c>
      <c r="P9" s="7">
        <v>-1.80840102156617</v>
      </c>
      <c r="Q9" s="7">
        <v>1.27409020558298</v>
      </c>
      <c r="R9" s="7">
        <v>2.14431898381281</v>
      </c>
      <c r="S9" s="7">
        <v>2.88087865945636</v>
      </c>
      <c r="T9" s="7">
        <v>4.31237249666538</v>
      </c>
      <c r="U9" s="7">
        <v>1.78893362304279</v>
      </c>
      <c r="V9" s="7">
        <v>1.85988571886446</v>
      </c>
      <c r="W9" s="7">
        <v>1.60357426902601</v>
      </c>
      <c r="X9" s="7">
        <v>2.12215093391069</v>
      </c>
      <c r="Y9" s="7">
        <v>1.93244435763245</v>
      </c>
      <c r="Z9" s="7">
        <v>-1.89320995183925</v>
      </c>
      <c r="AA9" s="7">
        <v>-2.75239967301104</v>
      </c>
      <c r="AB9" s="7">
        <v>5.20936020397539</v>
      </c>
      <c r="AC9" s="7">
        <v>-1.19203876880647</v>
      </c>
      <c r="AD9" s="7">
        <v>0.0874052208264402</v>
      </c>
      <c r="AE9" s="7">
        <v>0.540961797506952</v>
      </c>
      <c r="AF9" s="7">
        <v>2.50578530096254</v>
      </c>
      <c r="AG9" s="7">
        <v>2.87038743339872</v>
      </c>
      <c r="AH9" s="7">
        <v>0.74752028765306</v>
      </c>
      <c r="AI9" s="7">
        <v>-2.3038613404492</v>
      </c>
      <c r="AJ9" s="7">
        <v>-0.314173833759469</v>
      </c>
      <c r="AK9" s="7">
        <v>2.6261125543997</v>
      </c>
      <c r="AL9" s="7">
        <v>0.854866251004751</v>
      </c>
      <c r="AM9" s="7">
        <v>-2.68281463947415</v>
      </c>
      <c r="AN9" s="7">
        <v>-3.38638007244117</v>
      </c>
      <c r="AO9" s="7">
        <v>-0.0207037830577974</v>
      </c>
      <c r="AP9" s="7">
        <v>3.58002822696335</v>
      </c>
      <c r="AQ9" s="7">
        <v>7.14062311787302</v>
      </c>
      <c r="AR9" s="7">
        <v>-2.90226646089923</v>
      </c>
      <c r="AS9" s="7">
        <v>-0.113113182243524</v>
      </c>
      <c r="AT9" s="7">
        <v>1.81792236055117</v>
      </c>
      <c r="AU9" s="7">
        <v>0.509956437094843</v>
      </c>
      <c r="AV9" s="7">
        <v>0.216089396136795</v>
      </c>
      <c r="AW9" s="7">
        <v>-0.190703997146102</v>
      </c>
      <c r="AX9" s="7">
        <v>0.92156888352747</v>
      </c>
      <c r="AY9" s="7">
        <v>-1.13563530648707</v>
      </c>
      <c r="AZ9" s="7">
        <v>3.49266159687386</v>
      </c>
      <c r="BA9" s="7">
        <v>5.39912846729248</v>
      </c>
      <c r="BB9" s="7">
        <v>6.04646165427857</v>
      </c>
      <c r="BC9" s="7">
        <v>5.43212030545419</v>
      </c>
      <c r="BD9" s="7">
        <v>2.85283532679068</v>
      </c>
      <c r="BE9" s="7">
        <v>1.00109704960187</v>
      </c>
      <c r="BF9" s="7">
        <v>-0.121934418999444</v>
      </c>
      <c r="BG9" s="7">
        <v>1.7065871502773</v>
      </c>
      <c r="BH9" s="7">
        <v>0.852077404091688</v>
      </c>
      <c r="BI9" s="7">
        <v>0.972271806833305</v>
      </c>
      <c r="BJ9" s="7">
        <v>2.16582072884694</v>
      </c>
      <c r="BK9" s="7">
        <v>2.32951912686622</v>
      </c>
      <c r="BL9" s="7">
        <v>2.1480589979019</v>
      </c>
      <c r="BM9" s="7">
        <v>-0.847737291777776</v>
      </c>
      <c r="BN9" s="7">
        <v>2.98640296613303</v>
      </c>
      <c r="BO9" s="7">
        <v>4.59199000751642</v>
      </c>
      <c r="BP9" s="7">
        <v>4.73535919181722</v>
      </c>
      <c r="BQ9" s="7">
        <v>0.558062808640898</v>
      </c>
      <c r="BR9" s="7">
        <v>1.54369053337678</v>
      </c>
      <c r="BS9" s="7">
        <v>2.5296988644568</v>
      </c>
      <c r="BT9" s="7">
        <v>-1.44728529206577</v>
      </c>
      <c r="BU9" s="7">
        <v>4.63959114127692</v>
      </c>
      <c r="BV9" s="7">
        <v>0.711700162258239</v>
      </c>
      <c r="BW9" s="7">
        <v>0.293440605632895</v>
      </c>
      <c r="BX9" s="7">
        <v>4.25925028339634</v>
      </c>
      <c r="BY9" s="7">
        <v>2.40531941669997</v>
      </c>
      <c r="BZ9" s="7">
        <v>1.40540683009385</v>
      </c>
      <c r="CA9" s="7">
        <v>-2.83126556445541</v>
      </c>
      <c r="CB9" s="7">
        <v>-2.93252548578766</v>
      </c>
      <c r="CC9" s="7">
        <v>2.26566268934266</v>
      </c>
      <c r="CD9" s="7">
        <v>4.99606806988686</v>
      </c>
      <c r="CE9" s="7">
        <v>3.67016461841558</v>
      </c>
      <c r="CF9" s="7">
        <v>0.81271311757564</v>
      </c>
      <c r="CG9" s="7">
        <v>-2.53323823819756</v>
      </c>
      <c r="CH9" s="7">
        <v>-1.07609963704499</v>
      </c>
      <c r="CI9" s="7">
        <v>-0.948932018142386</v>
      </c>
      <c r="CJ9" s="7">
        <v>4.72423162691348</v>
      </c>
      <c r="CK9" s="7">
        <v>1.63492352557523</v>
      </c>
      <c r="CL9" s="7">
        <v>1.22770804558422</v>
      </c>
      <c r="CM9" s="7">
        <v>-1.22206407675549</v>
      </c>
      <c r="CN9" s="7">
        <v>1.21664904159752</v>
      </c>
      <c r="CO9" s="7">
        <v>-1.87583396942637</v>
      </c>
      <c r="CP9" s="7">
        <v>-1.34010960513979</v>
      </c>
      <c r="CQ9" s="7">
        <v>-0.074247422665394</v>
      </c>
      <c r="CR9" s="7">
        <v>1.20749965480718</v>
      </c>
      <c r="CS9" s="7">
        <v>1.29111603139563</v>
      </c>
      <c r="CT9" s="7">
        <v>3.00904887820843</v>
      </c>
    </row>
    <row r="10" spans="2:98" ht="15" customHeight="true">
      <c r="B10" s="6">
        <v>9</v>
      </c>
      <c r="C10" s="7">
        <v>0.739490370096064</v>
      </c>
      <c r="D10" s="7">
        <v>-1.2878070554666</v>
      </c>
      <c r="E10" s="7">
        <v>-0.6268842574882</v>
      </c>
      <c r="F10" s="7">
        <v>-0.51101938219881</v>
      </c>
      <c r="G10" s="7">
        <v>-1.34233847686937</v>
      </c>
      <c r="H10" s="7">
        <v>8.97640118464142</v>
      </c>
      <c r="I10" s="7">
        <v>1.17092620668927</v>
      </c>
      <c r="J10" s="7">
        <v>-1.73457357112784</v>
      </c>
      <c r="K10" s="7">
        <v>-6.6203911511393</v>
      </c>
      <c r="L10" s="7">
        <v>-1.98942768407414</v>
      </c>
      <c r="M10" s="7">
        <v>-1.02712767098228</v>
      </c>
      <c r="N10" s="7">
        <v>0.614626813016002</v>
      </c>
      <c r="O10" s="7">
        <v>1.32344926215455</v>
      </c>
      <c r="P10" s="7">
        <v>-1.86123632742056</v>
      </c>
      <c r="Q10" s="7">
        <v>0.836000455231897</v>
      </c>
      <c r="R10" s="7">
        <v>-1.70930673074554</v>
      </c>
      <c r="S10" s="7">
        <v>-3.7634678113377</v>
      </c>
      <c r="T10" s="7">
        <v>1.77431899846442</v>
      </c>
      <c r="U10" s="7">
        <v>-1.54677325010107</v>
      </c>
      <c r="V10" s="7">
        <v>-2.18680299778498</v>
      </c>
      <c r="W10" s="7">
        <v>0.858688296946639</v>
      </c>
      <c r="X10" s="7">
        <v>-0.784095359710591</v>
      </c>
      <c r="Y10" s="7">
        <v>-2.22539871531671</v>
      </c>
      <c r="Z10" s="7">
        <v>-1.28921467010741</v>
      </c>
      <c r="AA10" s="7">
        <v>2.19189697028833</v>
      </c>
      <c r="AB10" s="7">
        <v>-2.82067870886885</v>
      </c>
      <c r="AC10" s="7">
        <v>-0.689784421621425</v>
      </c>
      <c r="AD10" s="7">
        <v>0.42812799964986</v>
      </c>
      <c r="AE10" s="7">
        <v>0.510559504587945</v>
      </c>
      <c r="AF10" s="7">
        <v>-4.75570451203066</v>
      </c>
      <c r="AG10" s="7">
        <v>-1.38929530726728</v>
      </c>
      <c r="AH10" s="7">
        <v>-1.86614912532741</v>
      </c>
      <c r="AI10" s="7">
        <v>3.82675888256063</v>
      </c>
      <c r="AJ10" s="7">
        <v>-2.50216057965645</v>
      </c>
      <c r="AK10" s="7">
        <v>0.172210904330314</v>
      </c>
      <c r="AL10" s="7">
        <v>2.48935519676525</v>
      </c>
      <c r="AM10" s="7">
        <v>2.22411335919242</v>
      </c>
      <c r="AN10" s="7">
        <v>-3.29111325611575</v>
      </c>
      <c r="AO10" s="7">
        <v>-2.23480263974488</v>
      </c>
      <c r="AP10" s="7">
        <v>-2.23065396919583</v>
      </c>
      <c r="AQ10" s="7">
        <v>-4.4387571862103</v>
      </c>
      <c r="AR10" s="7">
        <v>-1.32081731918061</v>
      </c>
      <c r="AS10" s="7">
        <v>-1.557246836378</v>
      </c>
      <c r="AT10" s="7">
        <v>2.09066131481677</v>
      </c>
      <c r="AU10" s="7">
        <v>-1.56249875439335</v>
      </c>
      <c r="AV10" s="7">
        <v>-0.719841148995329</v>
      </c>
      <c r="AW10" s="7">
        <v>0.800475868492413</v>
      </c>
      <c r="AX10" s="7">
        <v>-4.86391029596871</v>
      </c>
      <c r="AY10" s="7">
        <v>4.38098397678323</v>
      </c>
      <c r="AZ10" s="7">
        <v>-2.14508056946215</v>
      </c>
      <c r="BA10" s="7">
        <v>-0.64986827977782</v>
      </c>
      <c r="BB10" s="7">
        <v>3.57251742906192</v>
      </c>
      <c r="BC10" s="7">
        <v>-1.09913871421304</v>
      </c>
      <c r="BD10" s="7">
        <v>-2.77602081116811</v>
      </c>
      <c r="BE10" s="7">
        <v>3.40500884386665</v>
      </c>
      <c r="BF10" s="7">
        <v>3.14488026104254</v>
      </c>
      <c r="BG10" s="7">
        <v>-0.689586946953114</v>
      </c>
      <c r="BH10" s="7">
        <v>-2.62396285102568</v>
      </c>
      <c r="BI10" s="7">
        <v>0.892334833398309</v>
      </c>
      <c r="BJ10" s="7">
        <v>2.03605336101327</v>
      </c>
      <c r="BK10" s="7">
        <v>-2.57027184785602</v>
      </c>
      <c r="BL10" s="7">
        <v>-2.0160510370647</v>
      </c>
      <c r="BM10" s="7">
        <v>2.52291584853401</v>
      </c>
      <c r="BN10" s="7">
        <v>1.63233380898237</v>
      </c>
      <c r="BO10" s="7">
        <v>4.32571000749749</v>
      </c>
      <c r="BP10" s="7">
        <v>0.711515480127673</v>
      </c>
      <c r="BQ10" s="7">
        <v>2.4838151343024</v>
      </c>
      <c r="BR10" s="7">
        <v>-4.68878208605065</v>
      </c>
      <c r="BS10" s="7">
        <v>-0.18832037838456</v>
      </c>
      <c r="BT10" s="7">
        <v>1.11547521729881</v>
      </c>
      <c r="BU10" s="7">
        <v>-3.79061705163122</v>
      </c>
      <c r="BV10" s="7">
        <v>-2.09479879104128</v>
      </c>
      <c r="BW10" s="7">
        <v>3.81821177624897</v>
      </c>
      <c r="BX10" s="7">
        <v>1.49402725812797</v>
      </c>
      <c r="BY10" s="7">
        <v>2.07891315461939</v>
      </c>
      <c r="BZ10" s="7">
        <v>4.17586885251694</v>
      </c>
      <c r="CA10" s="7">
        <v>5.69796954304547</v>
      </c>
      <c r="CB10" s="7">
        <v>7.07103297301501</v>
      </c>
      <c r="CC10" s="7">
        <v>1.38532966454386</v>
      </c>
      <c r="CD10" s="7">
        <v>2.84272711771382</v>
      </c>
      <c r="CE10" s="7">
        <v>1.49639506104631</v>
      </c>
      <c r="CF10" s="7">
        <v>-0.518484953676762</v>
      </c>
      <c r="CG10" s="7">
        <v>1.90935512276292</v>
      </c>
      <c r="CH10" s="7">
        <v>2.50023677798436</v>
      </c>
      <c r="CI10" s="7">
        <v>3.95875578355253</v>
      </c>
      <c r="CJ10" s="7">
        <v>2.45290418893865</v>
      </c>
      <c r="CK10" s="7">
        <v>1.40964473287249</v>
      </c>
      <c r="CL10" s="7">
        <v>-0.57183397548124</v>
      </c>
      <c r="CM10" s="7">
        <v>2.60112597299985</v>
      </c>
      <c r="CN10" s="7">
        <v>3.97747645947038</v>
      </c>
      <c r="CO10" s="7">
        <v>1.35952683452069</v>
      </c>
      <c r="CP10" s="7">
        <v>-3.04061021257348</v>
      </c>
      <c r="CQ10" s="7">
        <v>0.00816868599804366</v>
      </c>
      <c r="CR10" s="7">
        <v>-3.13029624625051</v>
      </c>
      <c r="CS10" s="7">
        <v>-0.864578929356867</v>
      </c>
      <c r="CT10" s="7">
        <v>-1.91185164459785</v>
      </c>
    </row>
    <row r="11" spans="2:98" ht="15" customHeight="true">
      <c r="B11" s="6">
        <v>10</v>
      </c>
      <c r="C11" s="7">
        <v>3.32206296661661</v>
      </c>
      <c r="D11" s="7">
        <v>1.23410196505665</v>
      </c>
      <c r="E11" s="7">
        <v>-1.6324062041258</v>
      </c>
      <c r="F11" s="7">
        <v>-0.258245132214597</v>
      </c>
      <c r="G11" s="7">
        <v>-0.466198328863356</v>
      </c>
      <c r="H11" s="7">
        <v>0.599193203211144</v>
      </c>
      <c r="I11" s="7">
        <v>-1.06367052501491</v>
      </c>
      <c r="J11" s="7">
        <v>-0.817269179847244</v>
      </c>
      <c r="K11" s="7">
        <v>0.56747527742391</v>
      </c>
      <c r="L11" s="7">
        <v>3.01783562916262</v>
      </c>
      <c r="M11" s="7">
        <v>-1.76758907398835</v>
      </c>
      <c r="N11" s="7">
        <v>-3.71189295010708</v>
      </c>
      <c r="O11" s="7">
        <v>-2.48263798026619</v>
      </c>
      <c r="P11" s="7">
        <v>1.70570845544626</v>
      </c>
      <c r="Q11" s="7">
        <v>-3.15664373576828</v>
      </c>
      <c r="R11" s="7">
        <v>-1.47099654591148</v>
      </c>
      <c r="S11" s="7">
        <v>-0.0722262348167533</v>
      </c>
      <c r="T11" s="7">
        <v>3.81520334664356</v>
      </c>
      <c r="U11" s="7">
        <v>2.32008640305185</v>
      </c>
      <c r="V11" s="7">
        <v>1.33609077190931</v>
      </c>
      <c r="W11" s="7">
        <v>-0.0823613779170955</v>
      </c>
      <c r="X11" s="7">
        <v>-1.32858908283879</v>
      </c>
      <c r="Y11" s="7">
        <v>-2.78828638649657</v>
      </c>
      <c r="Z11" s="7">
        <v>-0.146864412496598</v>
      </c>
      <c r="AA11" s="7">
        <v>-0.130138285077919</v>
      </c>
      <c r="AB11" s="7">
        <v>-0.384434898969175</v>
      </c>
      <c r="AC11" s="7">
        <v>-4.05653054982122</v>
      </c>
      <c r="AD11" s="7">
        <v>2.63191919635483</v>
      </c>
      <c r="AE11" s="7">
        <v>3.43088764908271</v>
      </c>
      <c r="AF11" s="7">
        <v>2.11072972326338</v>
      </c>
      <c r="AG11" s="7">
        <v>2.94328418915484</v>
      </c>
      <c r="AH11" s="7">
        <v>1.26393256058418</v>
      </c>
      <c r="AI11" s="7">
        <v>-4.15667232353735</v>
      </c>
      <c r="AJ11" s="7">
        <v>1.0149064672064</v>
      </c>
      <c r="AK11" s="7">
        <v>-1.10057108120918</v>
      </c>
      <c r="AL11" s="7">
        <v>1.68421020119922</v>
      </c>
      <c r="AM11" s="7">
        <v>1.13563607946435</v>
      </c>
      <c r="AN11" s="7">
        <v>-0.928038272863432</v>
      </c>
      <c r="AO11" s="7">
        <v>2.69987820813367</v>
      </c>
      <c r="AP11" s="7">
        <v>4.8519247759541</v>
      </c>
      <c r="AQ11" s="7">
        <v>-0.317496509759621</v>
      </c>
      <c r="AR11" s="7">
        <v>0.365528293878924</v>
      </c>
      <c r="AS11" s="7">
        <v>1.40694847788745</v>
      </c>
      <c r="AT11" s="7">
        <v>0.47429026782811</v>
      </c>
      <c r="AU11" s="7">
        <v>1.08733429868653</v>
      </c>
      <c r="AV11" s="7">
        <v>0.469416212461965</v>
      </c>
      <c r="AW11" s="7">
        <v>0.52097249314329</v>
      </c>
      <c r="AX11" s="7">
        <v>-0.051438560157294</v>
      </c>
      <c r="AY11" s="7">
        <v>-0.00549979985771643</v>
      </c>
      <c r="AZ11" s="7">
        <v>7.90491914269205</v>
      </c>
      <c r="BA11" s="7">
        <v>1.13283694820393</v>
      </c>
      <c r="BB11" s="7">
        <v>-2.50928129996737</v>
      </c>
      <c r="BC11" s="7">
        <v>-0.588704914208392</v>
      </c>
      <c r="BD11" s="7">
        <v>4.48984426788456</v>
      </c>
      <c r="BE11" s="7">
        <v>4.83905419198436</v>
      </c>
      <c r="BF11" s="7">
        <v>3.82773708443528</v>
      </c>
      <c r="BG11" s="7">
        <v>4.3122390470453</v>
      </c>
      <c r="BH11" s="7">
        <v>2.84515909252923</v>
      </c>
      <c r="BI11" s="7">
        <v>0.968647360195973</v>
      </c>
      <c r="BJ11" s="7">
        <v>-1.08557554320487</v>
      </c>
      <c r="BK11" s="7">
        <v>2.56446505061194</v>
      </c>
      <c r="BL11" s="7">
        <v>0.233856574587207</v>
      </c>
      <c r="BM11" s="7">
        <v>1.74881978485791</v>
      </c>
      <c r="BN11" s="7">
        <v>2.33895704820134</v>
      </c>
      <c r="BO11" s="7">
        <v>-0.0704730601951269</v>
      </c>
      <c r="BP11" s="7">
        <v>2.55140885426954</v>
      </c>
      <c r="BQ11" s="7">
        <v>-3.48663002530839</v>
      </c>
      <c r="BR11" s="7">
        <v>1.36939912901516</v>
      </c>
      <c r="BS11" s="7">
        <v>3.75908882561089</v>
      </c>
      <c r="BT11" s="7">
        <v>2.06414431616076</v>
      </c>
      <c r="BU11" s="7">
        <v>1.6693172434243</v>
      </c>
      <c r="BV11" s="7">
        <v>-1.07123795437201</v>
      </c>
      <c r="BW11" s="7">
        <v>5.44097384356746</v>
      </c>
      <c r="BX11" s="7">
        <v>1.77104528100108</v>
      </c>
      <c r="BY11" s="7">
        <v>2.46122736711413</v>
      </c>
      <c r="BZ11" s="7">
        <v>-2.81293502821427</v>
      </c>
      <c r="CA11" s="7">
        <v>0.151120389720745</v>
      </c>
      <c r="CB11" s="7">
        <v>5.45396076576753</v>
      </c>
      <c r="CC11" s="7">
        <v>-0.493101803329409</v>
      </c>
      <c r="CD11" s="7">
        <v>0.596902037676955</v>
      </c>
      <c r="CE11" s="7">
        <v>0.751992037735818</v>
      </c>
      <c r="CF11" s="7">
        <v>0.420315555552406</v>
      </c>
      <c r="CG11" s="7">
        <v>3.30849053916199</v>
      </c>
      <c r="CH11" s="7">
        <v>-0.416055962287828</v>
      </c>
      <c r="CI11" s="7">
        <v>5.69229096525896</v>
      </c>
      <c r="CJ11" s="7">
        <v>3.85417014428049</v>
      </c>
      <c r="CK11" s="7">
        <v>-0.178071290830303</v>
      </c>
      <c r="CL11" s="7">
        <v>1.99582187288206</v>
      </c>
      <c r="CM11" s="7">
        <v>-0.397361924314282</v>
      </c>
      <c r="CN11" s="7">
        <v>-2.60064600260057</v>
      </c>
      <c r="CO11" s="7">
        <v>1.53950410899824</v>
      </c>
      <c r="CP11" s="7">
        <v>6.26474377503428</v>
      </c>
      <c r="CQ11" s="7">
        <v>-1.19543134120886</v>
      </c>
      <c r="CR11" s="7">
        <v>-0.987145197629616</v>
      </c>
      <c r="CS11" s="7">
        <v>1.12496207244658</v>
      </c>
      <c r="CT11" s="7">
        <v>3.1487190219068</v>
      </c>
    </row>
    <row r="12" spans="2:98" ht="15" customHeight="true">
      <c r="B12" s="6">
        <v>11</v>
      </c>
      <c r="C12" s="7">
        <v>0.145308190079049</v>
      </c>
      <c r="D12" s="7">
        <v>2.2738311469252</v>
      </c>
      <c r="E12" s="7">
        <v>1.37661313636409</v>
      </c>
      <c r="F12" s="7">
        <v>-1.22699150787912</v>
      </c>
      <c r="G12" s="7">
        <v>-1.19003359289627</v>
      </c>
      <c r="H12" s="7">
        <v>-4.86500812980194</v>
      </c>
      <c r="I12" s="7">
        <v>-3.3780956618225</v>
      </c>
      <c r="J12" s="7">
        <v>0.20566182062521</v>
      </c>
      <c r="K12" s="7">
        <v>-1.99005157798865</v>
      </c>
      <c r="L12" s="7">
        <v>2.81751240583162</v>
      </c>
      <c r="M12" s="7">
        <v>-5.7866128097553</v>
      </c>
      <c r="N12" s="7">
        <v>0.486920220798311</v>
      </c>
      <c r="O12" s="7">
        <v>1.31931119050523</v>
      </c>
      <c r="P12" s="7">
        <v>-5.22064458493787</v>
      </c>
      <c r="Q12" s="7">
        <v>-0.577073745646885</v>
      </c>
      <c r="R12" s="7">
        <v>-2.26826521386465</v>
      </c>
      <c r="S12" s="7">
        <v>0.536860091011476</v>
      </c>
      <c r="T12" s="7">
        <v>-1.81693098715959</v>
      </c>
      <c r="U12" s="7">
        <v>-1.08157625601598</v>
      </c>
      <c r="V12" s="7">
        <v>-0.742633055518126</v>
      </c>
      <c r="W12" s="7">
        <v>0.142862475434868</v>
      </c>
      <c r="X12" s="7">
        <v>3.68862058860441</v>
      </c>
      <c r="Y12" s="7">
        <v>-0.360529417711859</v>
      </c>
      <c r="Z12" s="7">
        <v>0.0903582884716343</v>
      </c>
      <c r="AA12" s="7">
        <v>3.52935911877103</v>
      </c>
      <c r="AB12" s="7">
        <v>2.51252589526121</v>
      </c>
      <c r="AC12" s="7">
        <v>0.865978350672776</v>
      </c>
      <c r="AD12" s="7">
        <v>-1.78956047194151</v>
      </c>
      <c r="AE12" s="7">
        <v>-1.89885517041557</v>
      </c>
      <c r="AF12" s="7">
        <v>-0.440397430070334</v>
      </c>
      <c r="AG12" s="7">
        <v>0.349289267168388</v>
      </c>
      <c r="AH12" s="7">
        <v>1.82417238830931</v>
      </c>
      <c r="AI12" s="7">
        <v>-1.88312699100379</v>
      </c>
      <c r="AJ12" s="7">
        <v>4.54511599539728</v>
      </c>
      <c r="AK12" s="7">
        <v>-4.83951535001415</v>
      </c>
      <c r="AL12" s="7">
        <v>0.642987300297136</v>
      </c>
      <c r="AM12" s="7">
        <v>-0.738226149251659</v>
      </c>
      <c r="AN12" s="7">
        <v>5.1217461021688</v>
      </c>
      <c r="AO12" s="7">
        <v>-2.93856717234166</v>
      </c>
      <c r="AP12" s="7">
        <v>-0.775492819464944</v>
      </c>
      <c r="AQ12" s="7">
        <v>0.96961240624205</v>
      </c>
      <c r="AR12" s="7">
        <v>1.7766119369021</v>
      </c>
      <c r="AS12" s="7">
        <v>-0.62713656030246</v>
      </c>
      <c r="AT12" s="7">
        <v>1.00914871080113</v>
      </c>
      <c r="AU12" s="7">
        <v>-3.67470535864231</v>
      </c>
      <c r="AV12" s="7">
        <v>-2.81512442183566</v>
      </c>
      <c r="AW12" s="7">
        <v>-4.28465542398908</v>
      </c>
      <c r="AX12" s="7">
        <v>-0.498393148374362</v>
      </c>
      <c r="AY12" s="7">
        <v>1.36588352085619</v>
      </c>
      <c r="AZ12" s="7">
        <v>4.40550736427394</v>
      </c>
      <c r="BA12" s="7">
        <v>-0.192654657880212</v>
      </c>
      <c r="BB12" s="7">
        <v>4.60445798285536</v>
      </c>
      <c r="BC12" s="7">
        <v>2.36330986139274</v>
      </c>
      <c r="BD12" s="7">
        <v>1.81293546375855</v>
      </c>
      <c r="BE12" s="7">
        <v>-0.915350987731472</v>
      </c>
      <c r="BF12" s="7">
        <v>-0.407858039524399</v>
      </c>
      <c r="BG12" s="7">
        <v>-0.378514938335684</v>
      </c>
      <c r="BH12" s="7">
        <v>2.15045729326539</v>
      </c>
      <c r="BI12" s="7">
        <v>-4.73870541444967</v>
      </c>
      <c r="BJ12" s="7">
        <v>1.78820083097071</v>
      </c>
      <c r="BK12" s="7">
        <v>-2.59768879210242</v>
      </c>
      <c r="BL12" s="7">
        <v>4.80535917489715</v>
      </c>
      <c r="BM12" s="7">
        <v>1.24949893264966</v>
      </c>
      <c r="BN12" s="7">
        <v>0.29028341493904</v>
      </c>
      <c r="BO12" s="7">
        <v>1.34329413621208</v>
      </c>
      <c r="BP12" s="7">
        <v>1.29600449638929</v>
      </c>
      <c r="BQ12" s="7">
        <v>4.19723277699222</v>
      </c>
      <c r="BR12" s="7">
        <v>2.05035844666872</v>
      </c>
      <c r="BS12" s="7">
        <v>-1.11015990719261</v>
      </c>
      <c r="BT12" s="7">
        <v>-1.57780663698077</v>
      </c>
      <c r="BU12" s="7">
        <v>4.54456354397917</v>
      </c>
      <c r="BV12" s="7">
        <v>-1.541782541266</v>
      </c>
      <c r="BW12" s="7">
        <v>1.21411482351823</v>
      </c>
      <c r="BX12" s="7">
        <v>1.65549251902257</v>
      </c>
      <c r="BY12" s="7">
        <v>-2.50885563084967</v>
      </c>
      <c r="BZ12" s="7">
        <v>2.17471227009537</v>
      </c>
      <c r="CA12" s="7">
        <v>1.71532715196418</v>
      </c>
      <c r="CB12" s="7">
        <v>3.29731668622117</v>
      </c>
      <c r="CC12" s="7">
        <v>-3.40711212398992</v>
      </c>
      <c r="CD12" s="7">
        <v>-0.638168876525015</v>
      </c>
      <c r="CE12" s="7">
        <v>-0.635175674226502</v>
      </c>
      <c r="CF12" s="7">
        <v>3.02383036632455</v>
      </c>
      <c r="CG12" s="7">
        <v>2.74063458347473</v>
      </c>
      <c r="CH12" s="7">
        <v>-0.616722653347551</v>
      </c>
      <c r="CI12" s="7">
        <v>-1.9659370375748</v>
      </c>
      <c r="CJ12" s="7">
        <v>-3.03357554978675</v>
      </c>
      <c r="CK12" s="7">
        <v>3.21740352232337</v>
      </c>
      <c r="CL12" s="7">
        <v>5.73096814588007</v>
      </c>
      <c r="CM12" s="7">
        <v>3.58329452209318</v>
      </c>
      <c r="CN12" s="7">
        <v>2.24667201572993</v>
      </c>
      <c r="CO12" s="7">
        <v>-1.41694744751658</v>
      </c>
      <c r="CP12" s="7">
        <v>3.12076063507857</v>
      </c>
      <c r="CQ12" s="7">
        <v>6.54686096810792</v>
      </c>
      <c r="CR12" s="7">
        <v>2.27019621246154</v>
      </c>
      <c r="CS12" s="7">
        <v>3.96657394701333</v>
      </c>
      <c r="CT12" s="7">
        <v>-2.74204794704701</v>
      </c>
    </row>
    <row r="13" spans="2:98" ht="15" customHeight="true">
      <c r="B13" s="6">
        <v>12</v>
      </c>
      <c r="C13" s="7">
        <v>4.51257147368824</v>
      </c>
      <c r="D13" s="7">
        <v>-1.31549943744949</v>
      </c>
      <c r="E13" s="7">
        <v>0.253787604304307</v>
      </c>
      <c r="F13" s="7">
        <v>-0.763448770777814</v>
      </c>
      <c r="G13" s="7">
        <v>1.18407889387981</v>
      </c>
      <c r="H13" s="7">
        <v>-2.74648898147416</v>
      </c>
      <c r="I13" s="7">
        <v>-1.25696205494387</v>
      </c>
      <c r="J13" s="7">
        <v>3.46036253145121</v>
      </c>
      <c r="K13" s="7">
        <v>4.33306714347736</v>
      </c>
      <c r="L13" s="7">
        <v>3.31445704160433</v>
      </c>
      <c r="M13" s="7">
        <v>3.00944820630457</v>
      </c>
      <c r="N13" s="7">
        <v>2.37845058873518</v>
      </c>
      <c r="O13" s="7">
        <v>3.60160890682118</v>
      </c>
      <c r="P13" s="7">
        <v>1.46986630944684</v>
      </c>
      <c r="Q13" s="7">
        <v>-4.77876911618205</v>
      </c>
      <c r="R13" s="7">
        <v>1.98505810680217</v>
      </c>
      <c r="S13" s="7">
        <v>-0.611279865891447</v>
      </c>
      <c r="T13" s="7">
        <v>2.06170373238638</v>
      </c>
      <c r="U13" s="7">
        <v>-0.388397155099028</v>
      </c>
      <c r="V13" s="7">
        <v>2.49257086711168</v>
      </c>
      <c r="W13" s="7">
        <v>-0.429972168636596</v>
      </c>
      <c r="X13" s="7">
        <v>3.65688574007891</v>
      </c>
      <c r="Y13" s="7">
        <v>-2.81111314703321</v>
      </c>
      <c r="Z13" s="7">
        <v>2.67759528097622</v>
      </c>
      <c r="AA13" s="7">
        <v>-0.391188486696592</v>
      </c>
      <c r="AB13" s="7">
        <v>2.0781278347049</v>
      </c>
      <c r="AC13" s="7">
        <v>-3.35160326909454</v>
      </c>
      <c r="AD13" s="7">
        <v>0.0878518380632158</v>
      </c>
      <c r="AE13" s="7">
        <v>-2.01957688174934</v>
      </c>
      <c r="AF13" s="7">
        <v>1.69134919054113</v>
      </c>
      <c r="AG13" s="7">
        <v>-0.222489316443898</v>
      </c>
      <c r="AH13" s="7">
        <v>1.46758796527229</v>
      </c>
      <c r="AI13" s="7">
        <v>-4.2386720137697</v>
      </c>
      <c r="AJ13" s="7">
        <v>-1.36686163470085</v>
      </c>
      <c r="AK13" s="7">
        <v>-0.799361902105829</v>
      </c>
      <c r="AL13" s="7">
        <v>0.521213461726347</v>
      </c>
      <c r="AM13" s="7">
        <v>0.824664241814844</v>
      </c>
      <c r="AN13" s="7">
        <v>2.55469667869693</v>
      </c>
      <c r="AO13" s="7">
        <v>3.57151523419225</v>
      </c>
      <c r="AP13" s="7">
        <v>-0.380245817361356</v>
      </c>
      <c r="AQ13" s="7">
        <v>1.87848447167153</v>
      </c>
      <c r="AR13" s="7">
        <v>-0.772577337614621</v>
      </c>
      <c r="AS13" s="7">
        <v>-3.81438589176014</v>
      </c>
      <c r="AT13" s="7">
        <v>-0.382336266134644</v>
      </c>
      <c r="AU13" s="7">
        <v>-0.092496923397448</v>
      </c>
      <c r="AV13" s="7">
        <v>5.94391603717759</v>
      </c>
      <c r="AW13" s="7">
        <v>3.71214701944018</v>
      </c>
      <c r="AX13" s="7">
        <v>1.91603596509094</v>
      </c>
      <c r="AY13" s="7">
        <v>0.0374516033475629</v>
      </c>
      <c r="AZ13" s="7">
        <v>-2.00325944937958</v>
      </c>
      <c r="BA13" s="7">
        <v>0.135119609844878</v>
      </c>
      <c r="BB13" s="7">
        <v>-0.871811338644875</v>
      </c>
      <c r="BC13" s="7">
        <v>-1.37445176943447</v>
      </c>
      <c r="BD13" s="7">
        <v>3.2177412328183</v>
      </c>
      <c r="BE13" s="7">
        <v>0.454165149113123</v>
      </c>
      <c r="BF13" s="7">
        <v>3.35886179821</v>
      </c>
      <c r="BG13" s="7">
        <v>1.42480664263985</v>
      </c>
      <c r="BH13" s="7">
        <v>-2.04580218768024</v>
      </c>
      <c r="BI13" s="7">
        <v>2.18698435262695</v>
      </c>
      <c r="BJ13" s="7">
        <v>0.190329517708051</v>
      </c>
      <c r="BK13" s="7">
        <v>-1.17280428842196</v>
      </c>
      <c r="BL13" s="7">
        <v>0.000924131285501062</v>
      </c>
      <c r="BM13" s="7">
        <v>2.16836877295282</v>
      </c>
      <c r="BN13" s="7">
        <v>1.33933428417231</v>
      </c>
      <c r="BO13" s="7">
        <v>-3.84023446824722</v>
      </c>
      <c r="BP13" s="7">
        <v>1.693877860062</v>
      </c>
      <c r="BQ13" s="7">
        <v>-1.15577350180592</v>
      </c>
      <c r="BR13" s="7">
        <v>1.02691462871553</v>
      </c>
      <c r="BS13" s="7">
        <v>2.50965166794595</v>
      </c>
      <c r="BT13" s="7">
        <v>1.66831448748781</v>
      </c>
      <c r="BU13" s="7">
        <v>-5.40559323545995</v>
      </c>
      <c r="BV13" s="7">
        <v>0.899660108473654</v>
      </c>
      <c r="BW13" s="7">
        <v>1.53941622024468</v>
      </c>
      <c r="BX13" s="7">
        <v>2.0398524570096</v>
      </c>
      <c r="BY13" s="7">
        <v>-0.406334174067979</v>
      </c>
      <c r="BZ13" s="7">
        <v>5.20898754025302</v>
      </c>
      <c r="CA13" s="7">
        <v>1.45636802441004</v>
      </c>
      <c r="CB13" s="7">
        <v>2.6786659038703</v>
      </c>
      <c r="CC13" s="7">
        <v>-2.67409812056667</v>
      </c>
      <c r="CD13" s="7">
        <v>1.06603196396782</v>
      </c>
      <c r="CE13" s="7">
        <v>1.57381283918812</v>
      </c>
      <c r="CF13" s="7">
        <v>1.78677491656708</v>
      </c>
      <c r="CG13" s="7">
        <v>-1.60379092853782</v>
      </c>
      <c r="CH13" s="7">
        <v>-0.0425305728085732</v>
      </c>
      <c r="CI13" s="7">
        <v>-0.203940664516267</v>
      </c>
      <c r="CJ13" s="7">
        <v>0.0608896861867834</v>
      </c>
      <c r="CK13" s="7">
        <v>8.54237674734168</v>
      </c>
      <c r="CL13" s="7">
        <v>0.600038113626397</v>
      </c>
      <c r="CM13" s="7">
        <v>3.32767171877504</v>
      </c>
      <c r="CN13" s="7">
        <v>2.556656340676</v>
      </c>
      <c r="CO13" s="7">
        <v>1.03324718599697</v>
      </c>
      <c r="CP13" s="7">
        <v>1.69817351635493</v>
      </c>
      <c r="CQ13" s="7">
        <v>3.78343195875914</v>
      </c>
      <c r="CR13" s="7">
        <v>0.164857470457264</v>
      </c>
      <c r="CS13" s="7">
        <v>1.19629686101325</v>
      </c>
      <c r="CT13" s="7">
        <v>1.55937462265501</v>
      </c>
    </row>
    <row r="14" spans="2:98" ht="15" customHeight="true">
      <c r="B14" s="6">
        <v>13</v>
      </c>
      <c r="C14" s="7">
        <v>3.17018510389426</v>
      </c>
      <c r="D14" s="7">
        <v>8.81075922965601</v>
      </c>
      <c r="E14" s="7">
        <v>0.832409556672246</v>
      </c>
      <c r="F14" s="7">
        <v>-3.83231832788852</v>
      </c>
      <c r="G14" s="7">
        <v>-1.2224258375918</v>
      </c>
      <c r="H14" s="7">
        <v>-0.264594181889152</v>
      </c>
      <c r="I14" s="7">
        <v>-0.621330777451931</v>
      </c>
      <c r="J14" s="7">
        <v>5.5561439835792</v>
      </c>
      <c r="K14" s="7">
        <v>2.09952100837745</v>
      </c>
      <c r="L14" s="7">
        <v>-1.20435780510752</v>
      </c>
      <c r="M14" s="7">
        <v>1.53262484737343</v>
      </c>
      <c r="N14" s="7">
        <v>0.934123517787612</v>
      </c>
      <c r="O14" s="7">
        <v>9.46033412230054</v>
      </c>
      <c r="P14" s="7">
        <v>9.78287109307348</v>
      </c>
      <c r="Q14" s="7">
        <v>-4.81287399915664</v>
      </c>
      <c r="R14" s="7">
        <v>0.528991550239425</v>
      </c>
      <c r="S14" s="7">
        <v>1.8580077617089</v>
      </c>
      <c r="T14" s="7">
        <v>-1.33157001319432</v>
      </c>
      <c r="U14" s="7">
        <v>1.42777613495628</v>
      </c>
      <c r="V14" s="7">
        <v>1.77558499406587</v>
      </c>
      <c r="W14" s="7">
        <v>4.50272552205297</v>
      </c>
      <c r="X14" s="7">
        <v>-3.23972033681321</v>
      </c>
      <c r="Y14" s="7">
        <v>4.34899842302229</v>
      </c>
      <c r="Z14" s="7">
        <v>2.47928136430482</v>
      </c>
      <c r="AA14" s="7">
        <v>11.3049220466969</v>
      </c>
      <c r="AB14" s="7">
        <v>8.30253138205671</v>
      </c>
      <c r="AC14" s="7">
        <v>-4.38754401947563</v>
      </c>
      <c r="AD14" s="7">
        <v>5.89536986969915</v>
      </c>
      <c r="AE14" s="7">
        <v>-4.4532977691124</v>
      </c>
      <c r="AF14" s="7">
        <v>0.409175632632468</v>
      </c>
      <c r="AG14" s="7">
        <v>-0.616291936095422</v>
      </c>
      <c r="AH14" s="7">
        <v>1.93220733494582</v>
      </c>
      <c r="AI14" s="7">
        <v>5.29928357640074</v>
      </c>
      <c r="AJ14" s="7">
        <v>-0.317815720150975</v>
      </c>
      <c r="AK14" s="7">
        <v>-0.475020627038702</v>
      </c>
      <c r="AL14" s="7">
        <v>1.02430745176389</v>
      </c>
      <c r="AM14" s="7">
        <v>2.02907369063905</v>
      </c>
      <c r="AN14" s="7">
        <v>5.64959066627034</v>
      </c>
      <c r="AO14" s="7">
        <v>1.14395861888079</v>
      </c>
      <c r="AP14" s="7">
        <v>-4.2531422017646</v>
      </c>
      <c r="AQ14" s="7">
        <v>0.264806965277785</v>
      </c>
      <c r="AR14" s="7">
        <v>1.53974803860319</v>
      </c>
      <c r="AS14" s="7">
        <v>0.459009488267384</v>
      </c>
      <c r="AT14" s="7">
        <v>1.40859311814847</v>
      </c>
      <c r="AU14" s="7">
        <v>6.05544308787739</v>
      </c>
      <c r="AV14" s="7">
        <v>0.938772598668038</v>
      </c>
      <c r="AW14" s="7">
        <v>-1.17490959671977</v>
      </c>
      <c r="AX14" s="7">
        <v>-1.0520296306081</v>
      </c>
      <c r="AY14" s="7">
        <v>1.79874435703914</v>
      </c>
      <c r="AZ14" s="7">
        <v>0.724913677895529</v>
      </c>
      <c r="BA14" s="7">
        <v>1.82316789509332</v>
      </c>
      <c r="BB14" s="7">
        <v>4.07511492949698</v>
      </c>
      <c r="BC14" s="7">
        <v>0.695574686652435</v>
      </c>
      <c r="BD14" s="7">
        <v>-0.512025624672333</v>
      </c>
      <c r="BE14" s="7">
        <v>1.97711000174377</v>
      </c>
      <c r="BF14" s="7">
        <v>-0.381219671952749</v>
      </c>
      <c r="BG14" s="7">
        <v>2.01662708199365</v>
      </c>
      <c r="BH14" s="7">
        <v>1.45474232167999</v>
      </c>
      <c r="BI14" s="7">
        <v>4.45185378470978</v>
      </c>
      <c r="BJ14" s="7">
        <v>0.974774372748925</v>
      </c>
      <c r="BK14" s="7">
        <v>1.54448761141293</v>
      </c>
      <c r="BL14" s="7">
        <v>-0.782659519680692</v>
      </c>
      <c r="BM14" s="7">
        <v>3.80344338538453</v>
      </c>
      <c r="BN14" s="7">
        <v>-1.02742078389565</v>
      </c>
      <c r="BO14" s="7">
        <v>0.286019076865159</v>
      </c>
      <c r="BP14" s="7">
        <v>5.3939117489399</v>
      </c>
      <c r="BQ14" s="7">
        <v>-1.26537348213787</v>
      </c>
      <c r="BR14" s="7">
        <v>3.81654599814192</v>
      </c>
      <c r="BS14" s="7">
        <v>2.03293042189171</v>
      </c>
      <c r="BT14" s="7">
        <v>0.975244197673419</v>
      </c>
      <c r="BU14" s="7">
        <v>-4.81510218585026</v>
      </c>
      <c r="BV14" s="7">
        <v>0.0067014830719927</v>
      </c>
      <c r="BW14" s="7">
        <v>-0.591935170550187</v>
      </c>
      <c r="BX14" s="7">
        <v>-0.859981613052241</v>
      </c>
      <c r="BY14" s="7">
        <v>-1.61499520665666</v>
      </c>
      <c r="BZ14" s="7">
        <v>2.24448123814727</v>
      </c>
      <c r="CA14" s="7">
        <v>6.71703884409862</v>
      </c>
      <c r="CB14" s="7">
        <v>3.01236198263541</v>
      </c>
      <c r="CC14" s="7">
        <v>1.12480484762591</v>
      </c>
      <c r="CD14" s="7">
        <v>0.942513720692659</v>
      </c>
      <c r="CE14" s="7">
        <v>0.630357973240734</v>
      </c>
      <c r="CF14" s="7">
        <v>-0.241856592750082</v>
      </c>
      <c r="CG14" s="7">
        <v>-1.59716545570564</v>
      </c>
      <c r="CH14" s="7">
        <v>-0.102645661703264</v>
      </c>
      <c r="CI14" s="7">
        <v>-2.01519593059493</v>
      </c>
      <c r="CJ14" s="7">
        <v>3.87256175215998</v>
      </c>
      <c r="CK14" s="7">
        <v>1.88728957790363</v>
      </c>
      <c r="CL14" s="7">
        <v>0.00378789835031057</v>
      </c>
      <c r="CM14" s="7">
        <v>1.0221247978111</v>
      </c>
      <c r="CN14" s="7">
        <v>3.2419720167768</v>
      </c>
      <c r="CO14" s="7">
        <v>0.016091584136575</v>
      </c>
      <c r="CP14" s="7">
        <v>-1.90720337020184</v>
      </c>
      <c r="CQ14" s="7">
        <v>3.67968470980622</v>
      </c>
      <c r="CR14" s="7">
        <v>-1.81398313069531</v>
      </c>
      <c r="CS14" s="7">
        <v>4.50772747444398</v>
      </c>
      <c r="CT14" s="7">
        <v>3.08958065206934</v>
      </c>
    </row>
    <row r="15" spans="2:98" ht="15" customHeight="true">
      <c r="B15" s="6">
        <v>14</v>
      </c>
      <c r="C15" s="7">
        <v>12.8771889397917</v>
      </c>
      <c r="D15" s="7">
        <v>13.0933218134969</v>
      </c>
      <c r="E15" s="7">
        <v>1.03698402463351</v>
      </c>
      <c r="F15" s="7">
        <v>0.0300206414367494</v>
      </c>
      <c r="G15" s="7">
        <v>0.0116716756324422</v>
      </c>
      <c r="H15" s="7">
        <v>0.543331390105777</v>
      </c>
      <c r="I15" s="7">
        <v>3.38937712568713</v>
      </c>
      <c r="J15" s="7">
        <v>11.002222017386</v>
      </c>
      <c r="K15" s="7">
        <v>8.03005125776599</v>
      </c>
      <c r="L15" s="7">
        <v>-0.392012223451729</v>
      </c>
      <c r="M15" s="7">
        <v>0.309437160467951</v>
      </c>
      <c r="N15" s="7">
        <v>1.21419126417049</v>
      </c>
      <c r="O15" s="7">
        <v>15.1803872090582</v>
      </c>
      <c r="P15" s="7">
        <v>15.2935339463284</v>
      </c>
      <c r="Q15" s="7">
        <v>-0.329317043672745</v>
      </c>
      <c r="R15" s="7">
        <v>3.7080269322214</v>
      </c>
      <c r="S15" s="7">
        <v>2.48286385363417</v>
      </c>
      <c r="T15" s="7">
        <v>-0.599593875178925</v>
      </c>
      <c r="U15" s="7">
        <v>0.404877279564971</v>
      </c>
      <c r="V15" s="7">
        <v>7.18926610048629</v>
      </c>
      <c r="W15" s="7">
        <v>-1.59142450653826</v>
      </c>
      <c r="X15" s="7">
        <v>0.0486772536041826</v>
      </c>
      <c r="Y15" s="7">
        <v>2.0042470088415</v>
      </c>
      <c r="Z15" s="7">
        <v>5.51257831154498</v>
      </c>
      <c r="AA15" s="7">
        <v>18.5350657125355</v>
      </c>
      <c r="AB15" s="7">
        <v>18.6778596110853</v>
      </c>
      <c r="AC15" s="7">
        <v>6.41432617377359</v>
      </c>
      <c r="AD15" s="7">
        <v>-1.74894699251217</v>
      </c>
      <c r="AE15" s="7">
        <v>2.65383783046354</v>
      </c>
      <c r="AF15" s="7">
        <v>-0.853962064791631</v>
      </c>
      <c r="AG15" s="7">
        <v>-1.05617885999982</v>
      </c>
      <c r="AH15" s="7">
        <v>11.9528247885041</v>
      </c>
      <c r="AI15" s="7">
        <v>6.47419896743486</v>
      </c>
      <c r="AJ15" s="7">
        <v>-0.195003280871333</v>
      </c>
      <c r="AK15" s="7">
        <v>-0.184888552451866</v>
      </c>
      <c r="AL15" s="7">
        <v>-0.22459343168066</v>
      </c>
      <c r="AM15" s="7">
        <v>11.8972876531675</v>
      </c>
      <c r="AN15" s="7">
        <v>21.4606248647251</v>
      </c>
      <c r="AO15" s="7">
        <v>6.22614489453054</v>
      </c>
      <c r="AP15" s="7">
        <v>0.484966408828313</v>
      </c>
      <c r="AQ15" s="7">
        <v>-1.43464318746601</v>
      </c>
      <c r="AR15" s="7">
        <v>1.22210323957916</v>
      </c>
      <c r="AS15" s="7">
        <v>2.0215262466545</v>
      </c>
      <c r="AT15" s="7">
        <v>6.9178975076893</v>
      </c>
      <c r="AU15" s="7">
        <v>6.67548263803201</v>
      </c>
      <c r="AV15" s="7">
        <v>5.30404069602173</v>
      </c>
      <c r="AW15" s="7">
        <v>-0.113985520732513</v>
      </c>
      <c r="AX15" s="7">
        <v>1.8355004731784</v>
      </c>
      <c r="AY15" s="7">
        <v>1.07461854881603</v>
      </c>
      <c r="AZ15" s="7">
        <v>1.62264337166698</v>
      </c>
      <c r="BA15" s="7">
        <v>-0.679809576672596</v>
      </c>
      <c r="BB15" s="7">
        <v>3.8996563189371</v>
      </c>
      <c r="BC15" s="7">
        <v>-1.269175720352</v>
      </c>
      <c r="BD15" s="7">
        <v>0.894238708645389</v>
      </c>
      <c r="BE15" s="7">
        <v>0.724426448036411</v>
      </c>
      <c r="BF15" s="7">
        <v>8.24068079586323</v>
      </c>
      <c r="BG15" s="7">
        <v>-0.691586932991868</v>
      </c>
      <c r="BH15" s="7">
        <v>-0.601783033810534</v>
      </c>
      <c r="BI15" s="7">
        <v>-1.44907795292374</v>
      </c>
      <c r="BJ15" s="7">
        <v>-2.5623840342314</v>
      </c>
      <c r="BK15" s="7">
        <v>1.42268070489854</v>
      </c>
      <c r="BL15" s="7">
        <v>-0.103995373451653</v>
      </c>
      <c r="BM15" s="7">
        <v>1.3135650591189</v>
      </c>
      <c r="BN15" s="7">
        <v>2.35757758348927</v>
      </c>
      <c r="BO15" s="7">
        <v>1.7426010277818</v>
      </c>
      <c r="BP15" s="7">
        <v>2.75076790357343</v>
      </c>
      <c r="BQ15" s="7">
        <v>3.11556365018259</v>
      </c>
      <c r="BR15" s="7">
        <v>3.09560881070456</v>
      </c>
      <c r="BS15" s="7">
        <v>2.55889642575949</v>
      </c>
      <c r="BT15" s="7">
        <v>2.93676164359977</v>
      </c>
      <c r="BU15" s="7">
        <v>-2.17237015736873</v>
      </c>
      <c r="BV15" s="7">
        <v>0.285429035059678</v>
      </c>
      <c r="BW15" s="7">
        <v>-2.79608196893423</v>
      </c>
      <c r="BX15" s="7">
        <v>-0.658875440952215</v>
      </c>
      <c r="BY15" s="7">
        <v>1.44571569675372</v>
      </c>
      <c r="BZ15" s="7">
        <v>6.8930825003381</v>
      </c>
      <c r="CA15" s="7">
        <v>1.31765909597789</v>
      </c>
      <c r="CB15" s="7">
        <v>3.91515782076522</v>
      </c>
      <c r="CC15" s="7">
        <v>1.02107213517047</v>
      </c>
      <c r="CD15" s="7">
        <v>5.84908343762754</v>
      </c>
      <c r="CE15" s="7">
        <v>1.16196073072433</v>
      </c>
      <c r="CF15" s="7">
        <v>1.53918812975144</v>
      </c>
      <c r="CG15" s="7">
        <v>1.03798909781835</v>
      </c>
      <c r="CH15" s="7">
        <v>-3.0419395122467</v>
      </c>
      <c r="CI15" s="7">
        <v>0.272486980186386</v>
      </c>
      <c r="CJ15" s="7">
        <v>-0.349670452713781</v>
      </c>
      <c r="CK15" s="7">
        <v>2.87230449535855</v>
      </c>
      <c r="CL15" s="7">
        <v>2.02406122619232</v>
      </c>
      <c r="CM15" s="7">
        <v>2.42073026661365</v>
      </c>
      <c r="CN15" s="7">
        <v>3.71087121683286</v>
      </c>
      <c r="CO15" s="7">
        <v>1.14398167756508</v>
      </c>
      <c r="CP15" s="7">
        <v>6.58643115533687</v>
      </c>
      <c r="CQ15" s="7">
        <v>-0.0134649015367359</v>
      </c>
      <c r="CR15" s="7">
        <v>-0.795611437583375</v>
      </c>
      <c r="CS15" s="7">
        <v>3.77156903440618</v>
      </c>
      <c r="CT15" s="7">
        <v>1.34541468364705</v>
      </c>
    </row>
    <row r="16" spans="2:98" ht="15" customHeight="true">
      <c r="B16" s="6">
        <v>15</v>
      </c>
      <c r="C16" s="7">
        <v>31.6174702057601</v>
      </c>
      <c r="D16" s="7">
        <v>30.4742402918023</v>
      </c>
      <c r="E16" s="7">
        <v>12.3206476516843</v>
      </c>
      <c r="F16" s="7">
        <v>7.35003728914717</v>
      </c>
      <c r="G16" s="7">
        <v>5.92262488222423</v>
      </c>
      <c r="H16" s="7">
        <v>5.61088101851283</v>
      </c>
      <c r="I16" s="7">
        <v>4.3403955981471</v>
      </c>
      <c r="J16" s="7">
        <v>24.4319105962518</v>
      </c>
      <c r="K16" s="7">
        <v>20.0047184579826</v>
      </c>
      <c r="L16" s="7">
        <v>-2.78395010289069</v>
      </c>
      <c r="M16" s="7">
        <v>-0.0644421946790317</v>
      </c>
      <c r="N16" s="7">
        <v>2.55261526645336</v>
      </c>
      <c r="O16" s="7">
        <v>30.4980522837964</v>
      </c>
      <c r="P16" s="7">
        <v>38.1017534527023</v>
      </c>
      <c r="Q16" s="7">
        <v>15.0237535708325</v>
      </c>
      <c r="R16" s="7">
        <v>0.613512970710417</v>
      </c>
      <c r="S16" s="7">
        <v>6.40899074445178</v>
      </c>
      <c r="T16" s="7">
        <v>5.62352655323366</v>
      </c>
      <c r="U16" s="7">
        <v>-1.14903733163646</v>
      </c>
      <c r="V16" s="7">
        <v>15.3013306383159</v>
      </c>
      <c r="W16" s="7">
        <v>15.3829351555137</v>
      </c>
      <c r="X16" s="7">
        <v>2.07382535892521</v>
      </c>
      <c r="Y16" s="7">
        <v>2.5285771310746</v>
      </c>
      <c r="Z16" s="7">
        <v>0.147750775595796</v>
      </c>
      <c r="AA16" s="7">
        <v>37.6306334430401</v>
      </c>
      <c r="AB16" s="7">
        <v>46.5211668533034</v>
      </c>
      <c r="AC16" s="7">
        <v>9.80108339925482</v>
      </c>
      <c r="AD16" s="7">
        <v>9.37251074905726</v>
      </c>
      <c r="AE16" s="7">
        <v>6.79278628473458</v>
      </c>
      <c r="AF16" s="7">
        <v>1.97065913502774</v>
      </c>
      <c r="AG16" s="7">
        <v>3.28786006087603</v>
      </c>
      <c r="AH16" s="7">
        <v>20.1846284272519</v>
      </c>
      <c r="AI16" s="7">
        <v>15.6468236967021</v>
      </c>
      <c r="AJ16" s="7">
        <v>-4.58869308455178</v>
      </c>
      <c r="AK16" s="7">
        <v>4.06269201214627</v>
      </c>
      <c r="AL16" s="7">
        <v>1.08039795431932</v>
      </c>
      <c r="AM16" s="7">
        <v>27.072627506348</v>
      </c>
      <c r="AN16" s="7">
        <v>37.2942323205516</v>
      </c>
      <c r="AO16" s="7">
        <v>16.1824595967573</v>
      </c>
      <c r="AP16" s="7">
        <v>5.04807950769782</v>
      </c>
      <c r="AQ16" s="7">
        <v>1.98936189899496</v>
      </c>
      <c r="AR16" s="7">
        <v>8.29808544799516</v>
      </c>
      <c r="AS16" s="7">
        <v>3.86863825667433</v>
      </c>
      <c r="AT16" s="7">
        <v>24.333532245535</v>
      </c>
      <c r="AU16" s="7">
        <v>17.4164644012249</v>
      </c>
      <c r="AV16" s="7">
        <v>2.96312449903462</v>
      </c>
      <c r="AW16" s="7">
        <v>-1.66923071110568</v>
      </c>
      <c r="AX16" s="7">
        <v>1.84661211783805</v>
      </c>
      <c r="AY16" s="7">
        <v>2.91719068025623</v>
      </c>
      <c r="AZ16" s="7">
        <v>-3.2560034736116</v>
      </c>
      <c r="BA16" s="7">
        <v>3.26581624001437</v>
      </c>
      <c r="BB16" s="7">
        <v>4.82036018815961</v>
      </c>
      <c r="BC16" s="7">
        <v>3.81850098732821</v>
      </c>
      <c r="BD16" s="7">
        <v>2.59596637572849</v>
      </c>
      <c r="BE16" s="7">
        <v>-0.0730402349440738</v>
      </c>
      <c r="BF16" s="7">
        <v>7.12471238658054</v>
      </c>
      <c r="BG16" s="7">
        <v>2.74873204758114</v>
      </c>
      <c r="BH16" s="7">
        <v>-0.787519955430071</v>
      </c>
      <c r="BI16" s="7">
        <v>2.60166627174704</v>
      </c>
      <c r="BJ16" s="7">
        <v>0.453324000166958</v>
      </c>
      <c r="BK16" s="7">
        <v>0.942432721173191</v>
      </c>
      <c r="BL16" s="7">
        <v>2.30191114955414</v>
      </c>
      <c r="BM16" s="7">
        <v>-5.1814248901037</v>
      </c>
      <c r="BN16" s="7">
        <v>3.42951875156268</v>
      </c>
      <c r="BO16" s="7">
        <v>3.41679338068388</v>
      </c>
      <c r="BP16" s="7">
        <v>2.75314360099173</v>
      </c>
      <c r="BQ16" s="7">
        <v>4.0690268631547</v>
      </c>
      <c r="BR16" s="7">
        <v>5.21763277246191</v>
      </c>
      <c r="BS16" s="7">
        <v>2.84418571438255</v>
      </c>
      <c r="BT16" s="7">
        <v>-1.34863674995404</v>
      </c>
      <c r="BU16" s="7">
        <v>3.9023827577189</v>
      </c>
      <c r="BV16" s="7">
        <v>1.05835538184738</v>
      </c>
      <c r="BW16" s="7">
        <v>2.19675976138342</v>
      </c>
      <c r="BX16" s="7">
        <v>-1.22250130040129</v>
      </c>
      <c r="BY16" s="7">
        <v>4.01673453731428</v>
      </c>
      <c r="BZ16" s="7">
        <v>1.45096143801311</v>
      </c>
      <c r="CA16" s="7">
        <v>0.348054755011162</v>
      </c>
      <c r="CB16" s="7">
        <v>4.3691614502286</v>
      </c>
      <c r="CC16" s="7">
        <v>0.44010697469821</v>
      </c>
      <c r="CD16" s="7">
        <v>0.506272942233409</v>
      </c>
      <c r="CE16" s="7">
        <v>3.49851152738302</v>
      </c>
      <c r="CF16" s="7">
        <v>-2.61370429843419</v>
      </c>
      <c r="CG16" s="7">
        <v>2.59318177089563</v>
      </c>
      <c r="CH16" s="7">
        <v>-1.2514577117272</v>
      </c>
      <c r="CI16" s="7">
        <v>0.154404833954231</v>
      </c>
      <c r="CJ16" s="7">
        <v>2.16455810898151</v>
      </c>
      <c r="CK16" s="7">
        <v>2.06950175768588</v>
      </c>
      <c r="CL16" s="7">
        <v>-2.76757545200007</v>
      </c>
      <c r="CM16" s="7">
        <v>-0.74980734937435</v>
      </c>
      <c r="CN16" s="7">
        <v>3.33503883985031</v>
      </c>
      <c r="CO16" s="7">
        <v>0.285727198583572</v>
      </c>
      <c r="CP16" s="7">
        <v>-0.374934223536002</v>
      </c>
      <c r="CQ16" s="7">
        <v>6.58617391712687</v>
      </c>
      <c r="CR16" s="7">
        <v>3.47035514051822</v>
      </c>
      <c r="CS16" s="7">
        <v>1.81184195163587</v>
      </c>
      <c r="CT16" s="7">
        <v>5.19862881670679</v>
      </c>
    </row>
    <row r="17" spans="2:98" ht="15" customHeight="true">
      <c r="B17" s="6">
        <v>16</v>
      </c>
      <c r="C17" s="7">
        <v>62.2701925052761</v>
      </c>
      <c r="D17" s="7">
        <v>66.3259687186319</v>
      </c>
      <c r="E17" s="7">
        <v>29.1402244543187</v>
      </c>
      <c r="F17" s="7">
        <v>5.58203334531481</v>
      </c>
      <c r="G17" s="7">
        <v>6.49770485610634</v>
      </c>
      <c r="H17" s="7">
        <v>6.99318231952157</v>
      </c>
      <c r="I17" s="7">
        <v>12.4800842198911</v>
      </c>
      <c r="J17" s="7">
        <v>39.2009035486485</v>
      </c>
      <c r="K17" s="7">
        <v>40.8855901545903</v>
      </c>
      <c r="L17" s="7">
        <v>1.65916003037864</v>
      </c>
      <c r="M17" s="7">
        <v>0.415400131545994</v>
      </c>
      <c r="N17" s="7">
        <v>3.41980942071768</v>
      </c>
      <c r="O17" s="7">
        <v>61.8317961816842</v>
      </c>
      <c r="P17" s="7">
        <v>70.2241462305638</v>
      </c>
      <c r="Q17" s="7">
        <v>17.5765518397302</v>
      </c>
      <c r="R17" s="7">
        <v>8.74826402010149</v>
      </c>
      <c r="S17" s="7">
        <v>11.6215962243273</v>
      </c>
      <c r="T17" s="7">
        <v>12.7276735226556</v>
      </c>
      <c r="U17" s="7">
        <v>3.38565507640442</v>
      </c>
      <c r="V17" s="7">
        <v>39.2731952164845</v>
      </c>
      <c r="W17" s="7">
        <v>31.6120505770791</v>
      </c>
      <c r="X17" s="7">
        <v>-1.56718299264321</v>
      </c>
      <c r="Y17" s="7">
        <v>6.16349534776236</v>
      </c>
      <c r="Z17" s="7">
        <v>0.63419386322721</v>
      </c>
      <c r="AA17" s="7">
        <v>72.7576119731643</v>
      </c>
      <c r="AB17" s="7">
        <v>76.6997284708504</v>
      </c>
      <c r="AC17" s="7">
        <v>23.1980589634522</v>
      </c>
      <c r="AD17" s="7">
        <v>8.88671747992112</v>
      </c>
      <c r="AE17" s="7">
        <v>8.40130008927008</v>
      </c>
      <c r="AF17" s="7">
        <v>13.7426462156295</v>
      </c>
      <c r="AG17" s="7">
        <v>8.99699278676144</v>
      </c>
      <c r="AH17" s="7">
        <v>47.8181364113175</v>
      </c>
      <c r="AI17" s="7">
        <v>32.7032267303662</v>
      </c>
      <c r="AJ17" s="7">
        <v>5.99951567532844</v>
      </c>
      <c r="AK17" s="7">
        <v>4.6651474086816</v>
      </c>
      <c r="AL17" s="7">
        <v>3.4494055787427</v>
      </c>
      <c r="AM17" s="7">
        <v>59.2631033626017</v>
      </c>
      <c r="AN17" s="7">
        <v>73.2373206139096</v>
      </c>
      <c r="AO17" s="7">
        <v>31.3738736039827</v>
      </c>
      <c r="AP17" s="7">
        <v>11.5796475542079</v>
      </c>
      <c r="AQ17" s="7">
        <v>10.1512054459454</v>
      </c>
      <c r="AR17" s="7">
        <v>18.9831367021743</v>
      </c>
      <c r="AS17" s="7">
        <v>11.5541482983717</v>
      </c>
      <c r="AT17" s="7">
        <v>46.5637068095853</v>
      </c>
      <c r="AU17" s="7">
        <v>36.7100331597626</v>
      </c>
      <c r="AV17" s="7">
        <v>-2.97035626070146</v>
      </c>
      <c r="AW17" s="7">
        <v>3.75729322343977</v>
      </c>
      <c r="AX17" s="7">
        <v>-1.5123756016601</v>
      </c>
      <c r="AY17" s="7">
        <v>-4.08002267425854</v>
      </c>
      <c r="AZ17" s="7">
        <v>3.59404541446474</v>
      </c>
      <c r="BA17" s="7">
        <v>-1.26084308656618</v>
      </c>
      <c r="BB17" s="7">
        <v>-1.77277841624118</v>
      </c>
      <c r="BC17" s="7">
        <v>2.04725400122607</v>
      </c>
      <c r="BD17" s="7">
        <v>-4.55303676916537</v>
      </c>
      <c r="BE17" s="7">
        <v>1.68908038780501</v>
      </c>
      <c r="BF17" s="7">
        <v>7.63720371127738</v>
      </c>
      <c r="BG17" s="7">
        <v>2.59554143032437</v>
      </c>
      <c r="BH17" s="7">
        <v>-0.472197726711329</v>
      </c>
      <c r="BI17" s="7">
        <v>-1.06008362212833</v>
      </c>
      <c r="BJ17" s="7">
        <v>2.57943921435117</v>
      </c>
      <c r="BK17" s="7">
        <v>-2.59370412613089</v>
      </c>
      <c r="BL17" s="7">
        <v>-0.616096952093358</v>
      </c>
      <c r="BM17" s="7">
        <v>7.83021182141192</v>
      </c>
      <c r="BN17" s="7">
        <v>-1.01960475832584</v>
      </c>
      <c r="BO17" s="7">
        <v>-0.337355136208771</v>
      </c>
      <c r="BP17" s="7">
        <v>3.0059606651389</v>
      </c>
      <c r="BQ17" s="7">
        <v>-1.41587662517304</v>
      </c>
      <c r="BR17" s="7">
        <v>1.92396500553923</v>
      </c>
      <c r="BS17" s="7">
        <v>-2.88930285537708</v>
      </c>
      <c r="BT17" s="7">
        <v>-0.268299458527963</v>
      </c>
      <c r="BU17" s="7">
        <v>2.31843381954923</v>
      </c>
      <c r="BV17" s="7">
        <v>-2.21956924427195</v>
      </c>
      <c r="BW17" s="7">
        <v>-4.50940402325932</v>
      </c>
      <c r="BX17" s="7">
        <v>-0.826714187008292</v>
      </c>
      <c r="BY17" s="7">
        <v>1.18522530655218</v>
      </c>
      <c r="BZ17" s="7">
        <v>-0.644215182319385</v>
      </c>
      <c r="CA17" s="7">
        <v>-4.72493493265529</v>
      </c>
      <c r="CB17" s="7">
        <v>-0.895679463382748</v>
      </c>
      <c r="CC17" s="7">
        <v>-0.230919865988199</v>
      </c>
      <c r="CD17" s="7">
        <v>-0.637043981956594</v>
      </c>
      <c r="CE17" s="7">
        <v>-0.131639664552949</v>
      </c>
      <c r="CF17" s="7">
        <v>1.22398686074848</v>
      </c>
      <c r="CG17" s="7">
        <v>1.09440005447686</v>
      </c>
      <c r="CH17" s="7">
        <v>1.38081046124353</v>
      </c>
      <c r="CI17" s="7">
        <v>0.379475214349441</v>
      </c>
      <c r="CJ17" s="7">
        <v>2.45139032356792</v>
      </c>
      <c r="CK17" s="7">
        <v>0.572322827576045</v>
      </c>
      <c r="CL17" s="7">
        <v>0.0624432643544424</v>
      </c>
      <c r="CM17" s="7">
        <v>-2.56693220287389</v>
      </c>
      <c r="CN17" s="7">
        <v>-1.4067869255623</v>
      </c>
      <c r="CO17" s="7">
        <v>0.858275257912737</v>
      </c>
      <c r="CP17" s="7">
        <v>-2.24580032966514</v>
      </c>
      <c r="CQ17" s="7">
        <v>-0.349495003346874</v>
      </c>
      <c r="CR17" s="7">
        <v>-0.552507967235215</v>
      </c>
      <c r="CS17" s="7">
        <v>5.36241768006221</v>
      </c>
      <c r="CT17" s="7">
        <v>-2.12296496200952</v>
      </c>
    </row>
    <row r="18" spans="2:98" ht="15" customHeight="true">
      <c r="B18" s="6">
        <v>17</v>
      </c>
      <c r="C18" s="7">
        <v>123.549763884645</v>
      </c>
      <c r="D18" s="7">
        <v>129.657895464401</v>
      </c>
      <c r="E18" s="7">
        <v>53.3458757632743</v>
      </c>
      <c r="F18" s="7">
        <v>26.6763491886259</v>
      </c>
      <c r="G18" s="7">
        <v>19.7961670311688</v>
      </c>
      <c r="H18" s="7">
        <v>25.5974885044197</v>
      </c>
      <c r="I18" s="7">
        <v>22.3387607234763</v>
      </c>
      <c r="J18" s="7">
        <v>88.7560975419174</v>
      </c>
      <c r="K18" s="7">
        <v>76.5505364487485</v>
      </c>
      <c r="L18" s="7">
        <v>2.16780066090723</v>
      </c>
      <c r="M18" s="7">
        <v>1.61588851725446</v>
      </c>
      <c r="N18" s="7">
        <v>-0.972422749045108</v>
      </c>
      <c r="O18" s="7">
        <v>115.884752847812</v>
      </c>
      <c r="P18" s="7">
        <v>131.611194236562</v>
      </c>
      <c r="Q18" s="7">
        <v>51.4651630423409</v>
      </c>
      <c r="R18" s="7">
        <v>28.5177617340069</v>
      </c>
      <c r="S18" s="7">
        <v>22.0030909346388</v>
      </c>
      <c r="T18" s="7">
        <v>23.9108572894265</v>
      </c>
      <c r="U18" s="7">
        <v>17.7716107568963</v>
      </c>
      <c r="V18" s="7">
        <v>75.6401233419183</v>
      </c>
      <c r="W18" s="7">
        <v>67.1348153466756</v>
      </c>
      <c r="X18" s="7">
        <v>-0.733906589888193</v>
      </c>
      <c r="Y18" s="7">
        <v>2.00589565409746</v>
      </c>
      <c r="Z18" s="7">
        <v>2.06567871005382</v>
      </c>
      <c r="AA18" s="7">
        <v>140.296139871624</v>
      </c>
      <c r="AB18" s="7">
        <v>158.310173868999</v>
      </c>
      <c r="AC18" s="7">
        <v>56.7806689509962</v>
      </c>
      <c r="AD18" s="7">
        <v>31.9853503331156</v>
      </c>
      <c r="AE18" s="7">
        <v>26.5510869207633</v>
      </c>
      <c r="AF18" s="7">
        <v>30.7743029995427</v>
      </c>
      <c r="AG18" s="7">
        <v>29.1609079391465</v>
      </c>
      <c r="AH18" s="7">
        <v>91.8203615100883</v>
      </c>
      <c r="AI18" s="7">
        <v>68.2805498858338</v>
      </c>
      <c r="AJ18" s="7">
        <v>-0.28162386637996</v>
      </c>
      <c r="AK18" s="7">
        <v>0.821550047820892</v>
      </c>
      <c r="AL18" s="7">
        <v>-0.372182260876798</v>
      </c>
      <c r="AM18" s="7">
        <v>118.985617325256</v>
      </c>
      <c r="AN18" s="7">
        <v>143.349643463577</v>
      </c>
      <c r="AO18" s="7">
        <v>62.9877915476463</v>
      </c>
      <c r="AP18" s="7">
        <v>27.62126111721</v>
      </c>
      <c r="AQ18" s="7">
        <v>25.5134251056384</v>
      </c>
      <c r="AR18" s="7">
        <v>35.5567497291363</v>
      </c>
      <c r="AS18" s="7">
        <v>30.8352209398827</v>
      </c>
      <c r="AT18" s="7">
        <v>92.6141420220183</v>
      </c>
      <c r="AU18" s="7">
        <v>68.3351434724809</v>
      </c>
      <c r="AV18" s="7">
        <v>-3.93208500992205</v>
      </c>
      <c r="AW18" s="7">
        <v>1.88949664167694</v>
      </c>
      <c r="AX18" s="7">
        <v>0.506832093388766</v>
      </c>
      <c r="AY18" s="7">
        <v>-1.82931000098915</v>
      </c>
      <c r="AZ18" s="7">
        <v>-0.535475329844758</v>
      </c>
      <c r="BA18" s="7">
        <v>-0.593788495759327</v>
      </c>
      <c r="BB18" s="7">
        <v>1.3147373738293</v>
      </c>
      <c r="BC18" s="7">
        <v>0.840160195091357</v>
      </c>
      <c r="BD18" s="7">
        <v>0.20675182406967</v>
      </c>
      <c r="BE18" s="7">
        <v>-2.46559275915615</v>
      </c>
      <c r="BF18" s="7">
        <v>-0.270984805998978</v>
      </c>
      <c r="BG18" s="7">
        <v>2.11451891772003</v>
      </c>
      <c r="BH18" s="7">
        <v>1.23257683351449</v>
      </c>
      <c r="BI18" s="7">
        <v>-0.588766517640124</v>
      </c>
      <c r="BJ18" s="7">
        <v>3.93209506445601</v>
      </c>
      <c r="BK18" s="7">
        <v>4.58760917024347</v>
      </c>
      <c r="BL18" s="7">
        <v>-2.44546951707389</v>
      </c>
      <c r="BM18" s="7">
        <v>-1.64079957140848</v>
      </c>
      <c r="BN18" s="7">
        <v>-2.21523400168917</v>
      </c>
      <c r="BO18" s="7">
        <v>-1.20648562232736</v>
      </c>
      <c r="BP18" s="7">
        <v>6.62909405205892</v>
      </c>
      <c r="BQ18" s="7">
        <v>1.2694624453884</v>
      </c>
      <c r="BR18" s="7">
        <v>2.91888359936183</v>
      </c>
      <c r="BS18" s="7">
        <v>0.361068079667802</v>
      </c>
      <c r="BT18" s="7">
        <v>1.82206186088115</v>
      </c>
      <c r="BU18" s="7">
        <v>1.62695671526262</v>
      </c>
      <c r="BV18" s="7">
        <v>0.116049311639927</v>
      </c>
      <c r="BW18" s="7">
        <v>2.16372156325815</v>
      </c>
      <c r="BX18" s="7">
        <v>1.45818292763897</v>
      </c>
      <c r="BY18" s="7">
        <v>0.202668495208854</v>
      </c>
      <c r="BZ18" s="7">
        <v>-0.929866827216756</v>
      </c>
      <c r="CA18" s="7">
        <v>-2.70244497891963</v>
      </c>
      <c r="CB18" s="7">
        <v>-2.47405436449844</v>
      </c>
      <c r="CC18" s="7">
        <v>6.25851520351534</v>
      </c>
      <c r="CD18" s="7">
        <v>3.78134248842389</v>
      </c>
      <c r="CE18" s="7">
        <v>5.51217675466705</v>
      </c>
      <c r="CF18" s="7">
        <v>-2.38889199661026</v>
      </c>
      <c r="CG18" s="7">
        <v>-1.57284560371272</v>
      </c>
      <c r="CH18" s="7">
        <v>-2.70272932438002</v>
      </c>
      <c r="CI18" s="7">
        <v>-1.63819450594519</v>
      </c>
      <c r="CJ18" s="7">
        <v>2.55349766171139</v>
      </c>
      <c r="CK18" s="7">
        <v>-1.27872958125363</v>
      </c>
      <c r="CL18" s="7">
        <v>0.740989111463478</v>
      </c>
      <c r="CM18" s="7">
        <v>4.71832815966673</v>
      </c>
      <c r="CN18" s="7">
        <v>-0.678419907131684</v>
      </c>
      <c r="CO18" s="7">
        <v>0.250677169847222</v>
      </c>
      <c r="CP18" s="7">
        <v>-2.12265996320093</v>
      </c>
      <c r="CQ18" s="7">
        <v>1.83109391139897</v>
      </c>
      <c r="CR18" s="7">
        <v>0.292701360605861</v>
      </c>
      <c r="CS18" s="7">
        <v>-1.72584522650595</v>
      </c>
      <c r="CT18" s="7">
        <v>-0.117534445690126</v>
      </c>
    </row>
    <row r="19" spans="2:98" ht="15" customHeight="true">
      <c r="B19" s="6">
        <v>18</v>
      </c>
      <c r="C19" s="7">
        <v>228.272780810764</v>
      </c>
      <c r="D19" s="7">
        <v>231.959713140448</v>
      </c>
      <c r="E19" s="7">
        <v>106.04028914345</v>
      </c>
      <c r="F19" s="7">
        <v>55.3402475182816</v>
      </c>
      <c r="G19" s="7">
        <v>49.5689729301289</v>
      </c>
      <c r="H19" s="7">
        <v>52.1909630610221</v>
      </c>
      <c r="I19" s="7">
        <v>55.9918996713564</v>
      </c>
      <c r="J19" s="7">
        <v>162.630236336181</v>
      </c>
      <c r="K19" s="7">
        <v>150.922280667341</v>
      </c>
      <c r="L19" s="7">
        <v>-1.16797787628047</v>
      </c>
      <c r="M19" s="7">
        <v>0.508654533484332</v>
      </c>
      <c r="N19" s="7">
        <v>-0.40726228604035</v>
      </c>
      <c r="O19" s="7">
        <v>206.598904557602</v>
      </c>
      <c r="P19" s="7">
        <v>241.765609623559</v>
      </c>
      <c r="Q19" s="7">
        <v>99.9531239660578</v>
      </c>
      <c r="R19" s="7">
        <v>47.1056530248134</v>
      </c>
      <c r="S19" s="7">
        <v>41.9454974317655</v>
      </c>
      <c r="T19" s="7">
        <v>54.6906976126234</v>
      </c>
      <c r="U19" s="7">
        <v>49.5628359220168</v>
      </c>
      <c r="V19" s="7">
        <v>152.406795690257</v>
      </c>
      <c r="W19" s="7">
        <v>124.865209629856</v>
      </c>
      <c r="X19" s="7">
        <v>3.18055154642434</v>
      </c>
      <c r="Y19" s="7">
        <v>-2.66231377708755</v>
      </c>
      <c r="Z19" s="7">
        <v>0.990843691778991</v>
      </c>
      <c r="AA19" s="7">
        <v>253.127065736252</v>
      </c>
      <c r="AB19" s="7">
        <v>281.711032717979</v>
      </c>
      <c r="AC19" s="7">
        <v>112.478180944977</v>
      </c>
      <c r="AD19" s="7">
        <v>64.4365623061499</v>
      </c>
      <c r="AE19" s="7">
        <v>58.5783605174597</v>
      </c>
      <c r="AF19" s="7">
        <v>71.7968293098179</v>
      </c>
      <c r="AG19" s="7">
        <v>60.500799805985</v>
      </c>
      <c r="AH19" s="7">
        <v>177.67992936275</v>
      </c>
      <c r="AI19" s="7">
        <v>139.129615753458</v>
      </c>
      <c r="AJ19" s="7">
        <v>-0.52866082356195</v>
      </c>
      <c r="AK19" s="7">
        <v>-0.0842159776707376</v>
      </c>
      <c r="AL19" s="7">
        <v>-0.0884483404920502</v>
      </c>
      <c r="AM19" s="7">
        <v>209.256368859079</v>
      </c>
      <c r="AN19" s="7">
        <v>255.238020386329</v>
      </c>
      <c r="AO19" s="7">
        <v>122.252516688228</v>
      </c>
      <c r="AP19" s="7">
        <v>59.3910175198212</v>
      </c>
      <c r="AQ19" s="7">
        <v>55.9863343618099</v>
      </c>
      <c r="AR19" s="7">
        <v>63.2924668513729</v>
      </c>
      <c r="AS19" s="7">
        <v>60.0322957433491</v>
      </c>
      <c r="AT19" s="7">
        <v>175.811557328682</v>
      </c>
      <c r="AU19" s="7">
        <v>137.787965736362</v>
      </c>
      <c r="AV19" s="7">
        <v>-3.63602962019922</v>
      </c>
      <c r="AW19" s="7">
        <v>-2.87719059003939</v>
      </c>
      <c r="AX19" s="7">
        <v>-1.01585892945059</v>
      </c>
      <c r="AY19" s="7">
        <v>1.22090361973142</v>
      </c>
      <c r="AZ19" s="7">
        <v>-4.20427908982265</v>
      </c>
      <c r="BA19" s="7">
        <v>1.81902569811382</v>
      </c>
      <c r="BB19" s="7">
        <v>-0.699706763476115</v>
      </c>
      <c r="BC19" s="7">
        <v>-2.94967457127359</v>
      </c>
      <c r="BD19" s="7">
        <v>-0.449622165522214</v>
      </c>
      <c r="BE19" s="7">
        <v>0.174640319728496</v>
      </c>
      <c r="BF19" s="7">
        <v>-0.0466545533822682</v>
      </c>
      <c r="BG19" s="7">
        <v>-1.84147300971381</v>
      </c>
      <c r="BH19" s="7">
        <v>-1.61335445571149</v>
      </c>
      <c r="BI19" s="7">
        <v>0.983111708423621</v>
      </c>
      <c r="BJ19" s="7">
        <v>2.58202396739171</v>
      </c>
      <c r="BK19" s="7">
        <v>0.946819230883648</v>
      </c>
      <c r="BL19" s="7">
        <v>-0.313114099521954</v>
      </c>
      <c r="BM19" s="7">
        <v>0.810610013797032</v>
      </c>
      <c r="BN19" s="7">
        <v>-0.158829254231023</v>
      </c>
      <c r="BO19" s="7">
        <v>-0.238589273935759</v>
      </c>
      <c r="BP19" s="7">
        <v>-5.31674534899139</v>
      </c>
      <c r="BQ19" s="7">
        <v>-1.12014331091768</v>
      </c>
      <c r="BR19" s="7">
        <v>-0.0866230954811726</v>
      </c>
      <c r="BS19" s="7">
        <v>4.95051183446321</v>
      </c>
      <c r="BT19" s="7">
        <v>1.90551760565177</v>
      </c>
      <c r="BU19" s="7">
        <v>-2.92062176236504</v>
      </c>
      <c r="BV19" s="7">
        <v>1.58621113417621</v>
      </c>
      <c r="BW19" s="7">
        <v>1.77982143522195</v>
      </c>
      <c r="BX19" s="7">
        <v>-0.809816220721132</v>
      </c>
      <c r="BY19" s="7">
        <v>-4.88496669685537</v>
      </c>
      <c r="BZ19" s="7">
        <v>-2.29149828602158</v>
      </c>
      <c r="CA19" s="7">
        <v>-0.0768611598005009</v>
      </c>
      <c r="CB19" s="7">
        <v>1.40364751976585</v>
      </c>
      <c r="CC19" s="7">
        <v>-1.16750366046517</v>
      </c>
      <c r="CD19" s="7">
        <v>2.46741668625418</v>
      </c>
      <c r="CE19" s="7">
        <v>-0.766671183423568</v>
      </c>
      <c r="CF19" s="7">
        <v>1.22562035928013</v>
      </c>
      <c r="CG19" s="7">
        <v>-0.658278341461028</v>
      </c>
      <c r="CH19" s="7">
        <v>-0.0444195680374833</v>
      </c>
      <c r="CI19" s="7">
        <v>1.36748419245168</v>
      </c>
      <c r="CJ19" s="7">
        <v>-2.14407785697767</v>
      </c>
      <c r="CK19" s="7">
        <v>-1.59454546754978</v>
      </c>
      <c r="CL19" s="7">
        <v>-2.23894243628138</v>
      </c>
      <c r="CM19" s="7">
        <v>-0.142254638393752</v>
      </c>
      <c r="CN19" s="7">
        <v>3.67045733787154</v>
      </c>
      <c r="CO19" s="7">
        <v>-0.120599633598886</v>
      </c>
      <c r="CP19" s="7">
        <v>0.0458399047497551</v>
      </c>
      <c r="CQ19" s="7">
        <v>1.75604362341073</v>
      </c>
      <c r="CR19" s="7">
        <v>1.76558586149895</v>
      </c>
      <c r="CS19" s="7">
        <v>-3.76277109673947</v>
      </c>
      <c r="CT19" s="7">
        <v>-0.395001611896987</v>
      </c>
    </row>
    <row r="20" spans="2:98" ht="15" customHeight="true">
      <c r="B20" s="6">
        <v>19</v>
      </c>
      <c r="C20" s="7">
        <v>377.383798284258</v>
      </c>
      <c r="D20" s="7">
        <v>388.89763037006</v>
      </c>
      <c r="E20" s="7">
        <v>199.542350426263</v>
      </c>
      <c r="F20" s="7">
        <v>112.584418529885</v>
      </c>
      <c r="G20" s="7">
        <v>96.4063173163263</v>
      </c>
      <c r="H20" s="7">
        <v>109.897071748045</v>
      </c>
      <c r="I20" s="7">
        <v>119.694835417078</v>
      </c>
      <c r="J20" s="7">
        <v>289.522361703906</v>
      </c>
      <c r="K20" s="7">
        <v>267.005340069512</v>
      </c>
      <c r="L20" s="7">
        <v>2.09498610959372</v>
      </c>
      <c r="M20" s="7">
        <v>-0.32356085953279</v>
      </c>
      <c r="N20" s="7">
        <v>-0.483892994551297</v>
      </c>
      <c r="O20" s="7">
        <v>351.893294463897</v>
      </c>
      <c r="P20" s="7">
        <v>417.321698620045</v>
      </c>
      <c r="Q20" s="7">
        <v>193.130388990559</v>
      </c>
      <c r="R20" s="7">
        <v>95.8633271004005</v>
      </c>
      <c r="S20" s="7">
        <v>97.4098405448485</v>
      </c>
      <c r="T20" s="7">
        <v>112.621687462994</v>
      </c>
      <c r="U20" s="7">
        <v>97.9873314833903</v>
      </c>
      <c r="V20" s="7">
        <v>275.634086567249</v>
      </c>
      <c r="W20" s="7">
        <v>240.860361087766</v>
      </c>
      <c r="X20" s="7">
        <v>-0.237034622568444</v>
      </c>
      <c r="Y20" s="7">
        <v>1.41725839119681</v>
      </c>
      <c r="Z20" s="7">
        <v>1.18815219019552</v>
      </c>
      <c r="AA20" s="7">
        <v>434.244516477161</v>
      </c>
      <c r="AB20" s="7">
        <v>481.906974104684</v>
      </c>
      <c r="AC20" s="7">
        <v>226.822312210048</v>
      </c>
      <c r="AD20" s="7">
        <v>123.199508656353</v>
      </c>
      <c r="AE20" s="7">
        <v>122.62339580122</v>
      </c>
      <c r="AF20" s="7">
        <v>128.663833757384</v>
      </c>
      <c r="AG20" s="7">
        <v>121.340451289161</v>
      </c>
      <c r="AH20" s="7">
        <v>318.747410584966</v>
      </c>
      <c r="AI20" s="7">
        <v>260.660957207423</v>
      </c>
      <c r="AJ20" s="7">
        <v>3.17288772046004</v>
      </c>
      <c r="AK20" s="7">
        <v>6.000844546184</v>
      </c>
      <c r="AL20" s="7">
        <v>5.17847641674916</v>
      </c>
      <c r="AM20" s="7">
        <v>360.428648728876</v>
      </c>
      <c r="AN20" s="7">
        <v>437.329940781677</v>
      </c>
      <c r="AO20" s="7">
        <v>215.751945412476</v>
      </c>
      <c r="AP20" s="7">
        <v>115.057699045228</v>
      </c>
      <c r="AQ20" s="7">
        <v>114.358784442996</v>
      </c>
      <c r="AR20" s="7">
        <v>127.362520639061</v>
      </c>
      <c r="AS20" s="7">
        <v>121.864342097727</v>
      </c>
      <c r="AT20" s="7">
        <v>317.772900721254</v>
      </c>
      <c r="AU20" s="7">
        <v>243.602139766202</v>
      </c>
      <c r="AV20" s="7">
        <v>0.859048553811135</v>
      </c>
      <c r="AW20" s="7">
        <v>2.44370673531466</v>
      </c>
      <c r="AX20" s="7">
        <v>-0.517771758472918</v>
      </c>
      <c r="AY20" s="7">
        <v>2.71105603096566</v>
      </c>
      <c r="AZ20" s="7">
        <v>0.940167777023362</v>
      </c>
      <c r="BA20" s="7">
        <v>-0.726769637200505</v>
      </c>
      <c r="BB20" s="7">
        <v>-3.8169024359122</v>
      </c>
      <c r="BC20" s="7">
        <v>-0.838048462811457</v>
      </c>
      <c r="BD20" s="7">
        <v>1.43829087826816</v>
      </c>
      <c r="BE20" s="7">
        <v>-1.906197949535</v>
      </c>
      <c r="BF20" s="7">
        <v>-0.111458889980895</v>
      </c>
      <c r="BG20" s="7">
        <v>1.31115718558203</v>
      </c>
      <c r="BH20" s="7">
        <v>3.80392770038316</v>
      </c>
      <c r="BI20" s="7">
        <v>-0.00195282165441313</v>
      </c>
      <c r="BJ20" s="7">
        <v>2.73920077521916</v>
      </c>
      <c r="BK20" s="7">
        <v>5.714783548588</v>
      </c>
      <c r="BL20" s="7">
        <v>1.26774386082252</v>
      </c>
      <c r="BM20" s="7">
        <v>0.0223979516572399</v>
      </c>
      <c r="BN20" s="7">
        <v>0.324371802412315</v>
      </c>
      <c r="BO20" s="7">
        <v>0.597882261175982</v>
      </c>
      <c r="BP20" s="7">
        <v>-2.68927661230737</v>
      </c>
      <c r="BQ20" s="7">
        <v>4.25599712190433</v>
      </c>
      <c r="BR20" s="7">
        <v>2.01080365418784</v>
      </c>
      <c r="BS20" s="7">
        <v>4.75171155876706</v>
      </c>
      <c r="BT20" s="7">
        <v>0.414796142471914</v>
      </c>
      <c r="BU20" s="7">
        <v>-2.52468022640414</v>
      </c>
      <c r="BV20" s="7">
        <v>-2.12419847934689</v>
      </c>
      <c r="BW20" s="7">
        <v>3.88812517382303</v>
      </c>
      <c r="BX20" s="7">
        <v>0.0715125639549114</v>
      </c>
      <c r="BY20" s="7">
        <v>-0.134237718512395</v>
      </c>
      <c r="BZ20" s="7">
        <v>-3.46840486838255</v>
      </c>
      <c r="CA20" s="7">
        <v>2.22210766039052</v>
      </c>
      <c r="CB20" s="7">
        <v>2.06825609862472</v>
      </c>
      <c r="CC20" s="7">
        <v>-2.78357226034723</v>
      </c>
      <c r="CD20" s="7">
        <v>0.221348226933515</v>
      </c>
      <c r="CE20" s="7">
        <v>2.791628152474</v>
      </c>
      <c r="CF20" s="7">
        <v>0.0260904805913924</v>
      </c>
      <c r="CG20" s="7">
        <v>0.374084494173985</v>
      </c>
      <c r="CH20" s="7">
        <v>2.56205040084478</v>
      </c>
      <c r="CI20" s="7">
        <v>2.91751139413418</v>
      </c>
      <c r="CJ20" s="7">
        <v>0.726468834974639</v>
      </c>
      <c r="CK20" s="7">
        <v>0.239894618981452</v>
      </c>
      <c r="CL20" s="7">
        <v>-0.39290616453718</v>
      </c>
      <c r="CM20" s="7">
        <v>-3.6124115878124</v>
      </c>
      <c r="CN20" s="7">
        <v>0.843539777801652</v>
      </c>
      <c r="CO20" s="7">
        <v>-3.12889097757443</v>
      </c>
      <c r="CP20" s="7">
        <v>3.77537449932379</v>
      </c>
      <c r="CQ20" s="7">
        <v>0.407876301595934</v>
      </c>
      <c r="CR20" s="7">
        <v>2.29586239603668</v>
      </c>
      <c r="CS20" s="7">
        <v>2.54212798703293</v>
      </c>
      <c r="CT20" s="7">
        <v>-1.72240700863813</v>
      </c>
    </row>
    <row r="21" spans="2:98" ht="15" customHeight="true">
      <c r="B21" s="6">
        <v>20</v>
      </c>
      <c r="C21" s="7">
        <v>567.887182867465</v>
      </c>
      <c r="D21" s="7">
        <v>552.008979012785</v>
      </c>
      <c r="E21" s="7">
        <v>343.75515420468</v>
      </c>
      <c r="F21" s="7">
        <v>216.671952855671</v>
      </c>
      <c r="G21" s="7">
        <v>183.633039043879</v>
      </c>
      <c r="H21" s="7">
        <v>210.471665869919</v>
      </c>
      <c r="I21" s="7">
        <v>208.125220056269</v>
      </c>
      <c r="J21" s="7">
        <v>478.890855829124</v>
      </c>
      <c r="K21" s="7">
        <v>456.644766722334</v>
      </c>
      <c r="L21" s="7">
        <v>1.00388093496622</v>
      </c>
      <c r="M21" s="7">
        <v>2.43961541247427</v>
      </c>
      <c r="N21" s="7">
        <v>-1.30798950199278</v>
      </c>
      <c r="O21" s="7">
        <v>515.415366900539</v>
      </c>
      <c r="P21" s="7">
        <v>600.524215641468</v>
      </c>
      <c r="Q21" s="7">
        <v>335.995968675409</v>
      </c>
      <c r="R21" s="7">
        <v>181.57289969091</v>
      </c>
      <c r="S21" s="7">
        <v>180.197253502275</v>
      </c>
      <c r="T21" s="7">
        <v>207.715123194222</v>
      </c>
      <c r="U21" s="7">
        <v>185.710148117181</v>
      </c>
      <c r="V21" s="7">
        <v>457.109513653577</v>
      </c>
      <c r="W21" s="7">
        <v>397.322430564612</v>
      </c>
      <c r="X21" s="7">
        <v>0.334566618912504</v>
      </c>
      <c r="Y21" s="7">
        <v>2.8624533299012</v>
      </c>
      <c r="Z21" s="7">
        <v>1.54554799002108</v>
      </c>
      <c r="AA21" s="7">
        <v>625.072337207621</v>
      </c>
      <c r="AB21" s="7">
        <v>688.25400780947</v>
      </c>
      <c r="AC21" s="7">
        <v>390.801987621029</v>
      </c>
      <c r="AD21" s="7">
        <v>231.296559593909</v>
      </c>
      <c r="AE21" s="7">
        <v>228.775613412889</v>
      </c>
      <c r="AF21" s="7">
        <v>244.67753531942</v>
      </c>
      <c r="AG21" s="7">
        <v>230.34597082911</v>
      </c>
      <c r="AH21" s="7">
        <v>536.313086019653</v>
      </c>
      <c r="AI21" s="7">
        <v>450.493785437598</v>
      </c>
      <c r="AJ21" s="7">
        <v>2.41593040137923</v>
      </c>
      <c r="AK21" s="7">
        <v>0.675278558089758</v>
      </c>
      <c r="AL21" s="7">
        <v>4.13867968585873</v>
      </c>
      <c r="AM21" s="7">
        <v>539.891129220902</v>
      </c>
      <c r="AN21" s="7">
        <v>625.157278472442</v>
      </c>
      <c r="AO21" s="7">
        <v>363.897083915215</v>
      </c>
      <c r="AP21" s="7">
        <v>213.187396641275</v>
      </c>
      <c r="AQ21" s="7">
        <v>202.744147322434</v>
      </c>
      <c r="AR21" s="7">
        <v>232.910396709363</v>
      </c>
      <c r="AS21" s="7">
        <v>229.580565703409</v>
      </c>
      <c r="AT21" s="7">
        <v>524.562650334146</v>
      </c>
      <c r="AU21" s="7">
        <v>430.994218026144</v>
      </c>
      <c r="AV21" s="7">
        <v>-3.19778228775022</v>
      </c>
      <c r="AW21" s="7">
        <v>-3.38441152038831</v>
      </c>
      <c r="AX21" s="7">
        <v>-0.426155356249637</v>
      </c>
      <c r="AY21" s="7">
        <v>6.22125826420188</v>
      </c>
      <c r="AZ21" s="7">
        <v>-0.525072425447888</v>
      </c>
      <c r="BA21" s="7">
        <v>2.35533433939781</v>
      </c>
      <c r="BB21" s="7">
        <v>-1.37092764093632</v>
      </c>
      <c r="BC21" s="7">
        <v>-1.46639143305583</v>
      </c>
      <c r="BD21" s="7">
        <v>-2.91598683283019</v>
      </c>
      <c r="BE21" s="7">
        <v>1.50892536526408</v>
      </c>
      <c r="BF21" s="7">
        <v>3.64236883136891</v>
      </c>
      <c r="BG21" s="7">
        <v>-0.0864435355101705</v>
      </c>
      <c r="BH21" s="7">
        <v>-2.46494922258171</v>
      </c>
      <c r="BI21" s="7">
        <v>4.01170614019247</v>
      </c>
      <c r="BJ21" s="7">
        <v>-0.288036035800815</v>
      </c>
      <c r="BK21" s="7">
        <v>5.90525978409687</v>
      </c>
      <c r="BL21" s="7">
        <v>3.16525174877506</v>
      </c>
      <c r="BM21" s="7">
        <v>-0.803271291848887</v>
      </c>
      <c r="BN21" s="7">
        <v>1.26877251197538</v>
      </c>
      <c r="BO21" s="7">
        <v>1.90820597816128</v>
      </c>
      <c r="BP21" s="7">
        <v>0.0830086430651136</v>
      </c>
      <c r="BQ21" s="7">
        <v>2.79876754828683</v>
      </c>
      <c r="BR21" s="7">
        <v>0.92165047158278</v>
      </c>
      <c r="BS21" s="7">
        <v>-0.65224895504889</v>
      </c>
      <c r="BT21" s="7">
        <v>-2.608534980684</v>
      </c>
      <c r="BU21" s="7">
        <v>7.62027002306331</v>
      </c>
      <c r="BV21" s="7">
        <v>-1.65047851077998</v>
      </c>
      <c r="BW21" s="7">
        <v>9.35531281792874</v>
      </c>
      <c r="BX21" s="7">
        <v>3.55117887961478</v>
      </c>
      <c r="BY21" s="7">
        <v>-2.38722673495431</v>
      </c>
      <c r="BZ21" s="7">
        <v>-2.83482264352824</v>
      </c>
      <c r="CA21" s="7">
        <v>0.940473021113576</v>
      </c>
      <c r="CB21" s="7">
        <v>-2.09229057867606</v>
      </c>
      <c r="CC21" s="7">
        <v>7.44781365800463</v>
      </c>
      <c r="CD21" s="7">
        <v>3.25051054003461</v>
      </c>
      <c r="CE21" s="7">
        <v>-3.47287623598913</v>
      </c>
      <c r="CF21" s="7">
        <v>4.95383536686222</v>
      </c>
      <c r="CG21" s="7">
        <v>-0.638963256905299</v>
      </c>
      <c r="CH21" s="7">
        <v>1.01081277091407</v>
      </c>
      <c r="CI21" s="7">
        <v>4.94163702228434</v>
      </c>
      <c r="CJ21" s="7">
        <v>-4.25876809109559</v>
      </c>
      <c r="CK21" s="7">
        <v>0.737925883530352</v>
      </c>
      <c r="CL21" s="7">
        <v>-1.52219057320917</v>
      </c>
      <c r="CM21" s="7">
        <v>-3.92085002177782</v>
      </c>
      <c r="CN21" s="7">
        <v>-3.01848497209858</v>
      </c>
      <c r="CO21" s="7">
        <v>4.4763235116593</v>
      </c>
      <c r="CP21" s="7">
        <v>6.64113627686402</v>
      </c>
      <c r="CQ21" s="7">
        <v>4.93780040948195</v>
      </c>
      <c r="CR21" s="7">
        <v>2.49824837457845</v>
      </c>
      <c r="CS21" s="7">
        <v>-2.10436122007013</v>
      </c>
      <c r="CT21" s="7">
        <v>1.1238511598558</v>
      </c>
    </row>
    <row r="22" spans="2:98" ht="15" customHeight="true">
      <c r="B22" s="6">
        <v>21</v>
      </c>
      <c r="C22" s="7">
        <v>741.38618373214</v>
      </c>
      <c r="D22" s="7">
        <v>709.165647843947</v>
      </c>
      <c r="E22" s="7">
        <v>544.826646020168</v>
      </c>
      <c r="F22" s="7">
        <v>364.040780401817</v>
      </c>
      <c r="G22" s="7">
        <v>322.548699599752</v>
      </c>
      <c r="H22" s="7">
        <v>367.576406118112</v>
      </c>
      <c r="I22" s="7">
        <v>361.245104276236</v>
      </c>
      <c r="J22" s="7">
        <v>676.045688054025</v>
      </c>
      <c r="K22" s="7">
        <v>655.482785989631</v>
      </c>
      <c r="L22" s="7">
        <v>0.0155093629255134</v>
      </c>
      <c r="M22" s="7">
        <v>8.86039655282093</v>
      </c>
      <c r="N22" s="7">
        <v>2.33913085064478</v>
      </c>
      <c r="O22" s="7">
        <v>670.874330344029</v>
      </c>
      <c r="P22" s="7">
        <v>778.265869418263</v>
      </c>
      <c r="Q22" s="7">
        <v>525.353400448245</v>
      </c>
      <c r="R22" s="7">
        <v>312.375568780717</v>
      </c>
      <c r="S22" s="7">
        <v>320.472854633399</v>
      </c>
      <c r="T22" s="7">
        <v>355.390630797328</v>
      </c>
      <c r="U22" s="7">
        <v>324.691826263591</v>
      </c>
      <c r="V22" s="7">
        <v>649.173876669372</v>
      </c>
      <c r="W22" s="7">
        <v>599.599837106045</v>
      </c>
      <c r="X22" s="7">
        <v>5.62537703653788</v>
      </c>
      <c r="Y22" s="7">
        <v>2.75764533210167</v>
      </c>
      <c r="Z22" s="7">
        <v>-2.48142147400631</v>
      </c>
      <c r="AA22" s="7">
        <v>815.730035818669</v>
      </c>
      <c r="AB22" s="7">
        <v>886.250211526748</v>
      </c>
      <c r="AC22" s="7">
        <v>614.211080900467</v>
      </c>
      <c r="AD22" s="7">
        <v>391.76682829419</v>
      </c>
      <c r="AE22" s="7">
        <v>391.536127315105</v>
      </c>
      <c r="AF22" s="7">
        <v>413.731990898187</v>
      </c>
      <c r="AG22" s="7">
        <v>397.456565581954</v>
      </c>
      <c r="AH22" s="7">
        <v>760.992222186153</v>
      </c>
      <c r="AI22" s="7">
        <v>651.65420436133</v>
      </c>
      <c r="AJ22" s="7">
        <v>4.65967779736184</v>
      </c>
      <c r="AK22" s="7">
        <v>2.74558658339492</v>
      </c>
      <c r="AL22" s="7">
        <v>-0.0394246989108069</v>
      </c>
      <c r="AM22" s="7">
        <v>707.127902100591</v>
      </c>
      <c r="AN22" s="7">
        <v>804.353575493558</v>
      </c>
      <c r="AO22" s="7">
        <v>566.361959396589</v>
      </c>
      <c r="AP22" s="7">
        <v>372.699735479699</v>
      </c>
      <c r="AQ22" s="7">
        <v>355.989383286579</v>
      </c>
      <c r="AR22" s="7">
        <v>393.414229546654</v>
      </c>
      <c r="AS22" s="7">
        <v>400.425963117252</v>
      </c>
      <c r="AT22" s="7">
        <v>735.719401297778</v>
      </c>
      <c r="AU22" s="7">
        <v>627.59389477107</v>
      </c>
      <c r="AV22" s="7">
        <v>-1.85344458287636</v>
      </c>
      <c r="AW22" s="7">
        <v>-0.557124370263864</v>
      </c>
      <c r="AX22" s="7">
        <v>2.33928058781021</v>
      </c>
      <c r="AY22" s="7">
        <v>16.313893076408</v>
      </c>
      <c r="AZ22" s="7">
        <v>1.62726200421321</v>
      </c>
      <c r="BA22" s="7">
        <v>1.3564609801083</v>
      </c>
      <c r="BB22" s="7">
        <v>-3.58421945028658</v>
      </c>
      <c r="BC22" s="7">
        <v>-0.012371048451314</v>
      </c>
      <c r="BD22" s="7">
        <v>2.18404488189844</v>
      </c>
      <c r="BE22" s="7">
        <v>3.41418241078645</v>
      </c>
      <c r="BF22" s="7">
        <v>-1.28954551801053</v>
      </c>
      <c r="BG22" s="7">
        <v>2.81551782292263</v>
      </c>
      <c r="BH22" s="7">
        <v>1.48262482398786</v>
      </c>
      <c r="BI22" s="7">
        <v>-1.34318981233901</v>
      </c>
      <c r="BJ22" s="7">
        <v>3.59409978030681</v>
      </c>
      <c r="BK22" s="7">
        <v>14.9603606983619</v>
      </c>
      <c r="BL22" s="7">
        <v>3.44572071618404</v>
      </c>
      <c r="BM22" s="7">
        <v>-0.620909998336174</v>
      </c>
      <c r="BN22" s="7">
        <v>-1.12233168368766</v>
      </c>
      <c r="BO22" s="7">
        <v>-3.84115862395947</v>
      </c>
      <c r="BP22" s="7">
        <v>-4.33487197397608</v>
      </c>
      <c r="BQ22" s="7">
        <v>1.79740708081408</v>
      </c>
      <c r="BR22" s="7">
        <v>-1.74432715347848</v>
      </c>
      <c r="BS22" s="7">
        <v>1.65260095662506</v>
      </c>
      <c r="BT22" s="7">
        <v>1.56569007662438</v>
      </c>
      <c r="BU22" s="7">
        <v>4.36920825023935</v>
      </c>
      <c r="BV22" s="7">
        <v>0.762338343994998</v>
      </c>
      <c r="BW22" s="7">
        <v>18.3096260229136</v>
      </c>
      <c r="BX22" s="7">
        <v>2.01646121691238</v>
      </c>
      <c r="BY22" s="7">
        <v>-0.800192724000681</v>
      </c>
      <c r="BZ22" s="7">
        <v>-0.603922808048537</v>
      </c>
      <c r="CA22" s="7">
        <v>-2.03579670072713</v>
      </c>
      <c r="CB22" s="7">
        <v>-0.576910448950912</v>
      </c>
      <c r="CC22" s="7">
        <v>2.27524922356997</v>
      </c>
      <c r="CD22" s="7">
        <v>0.91245991647429</v>
      </c>
      <c r="CE22" s="7">
        <v>-0.887104690241813</v>
      </c>
      <c r="CF22" s="7">
        <v>-0.445161969399123</v>
      </c>
      <c r="CG22" s="7">
        <v>6.8588213394687</v>
      </c>
      <c r="CH22" s="7">
        <v>0.493568924344345</v>
      </c>
      <c r="CI22" s="7">
        <v>14.5560412128552</v>
      </c>
      <c r="CJ22" s="7">
        <v>1.58805095694424</v>
      </c>
      <c r="CK22" s="7">
        <v>-3.44931109663457</v>
      </c>
      <c r="CL22" s="7">
        <v>-4.21541238924419</v>
      </c>
      <c r="CM22" s="7">
        <v>-3.61398210404604</v>
      </c>
      <c r="CN22" s="7">
        <v>-2.59262330788533</v>
      </c>
      <c r="CO22" s="7">
        <v>-4.94718101908938</v>
      </c>
      <c r="CP22" s="7">
        <v>4.67731902294781</v>
      </c>
      <c r="CQ22" s="7">
        <v>2.69692290837747</v>
      </c>
      <c r="CR22" s="7">
        <v>-0.725541883643018</v>
      </c>
      <c r="CS22" s="7">
        <v>-3.34343914242345</v>
      </c>
      <c r="CT22" s="7">
        <v>-0.991325205180601</v>
      </c>
    </row>
    <row r="23" spans="2:98" ht="15" customHeight="true">
      <c r="B23" s="6">
        <v>22</v>
      </c>
      <c r="C23" s="7">
        <v>885.550638473378</v>
      </c>
      <c r="D23" s="7">
        <v>838.037135563412</v>
      </c>
      <c r="E23" s="7">
        <v>740.848907264132</v>
      </c>
      <c r="F23" s="7">
        <v>562.965199829648</v>
      </c>
      <c r="G23" s="7">
        <v>514.616871647856</v>
      </c>
      <c r="H23" s="7">
        <v>580.870429017764</v>
      </c>
      <c r="I23" s="7">
        <v>567.611540744945</v>
      </c>
      <c r="J23" s="7">
        <v>868.307203322094</v>
      </c>
      <c r="K23" s="7">
        <v>850.044298188835</v>
      </c>
      <c r="L23" s="7">
        <v>2.25433332235298</v>
      </c>
      <c r="M23" s="7">
        <v>2.30925474786454</v>
      </c>
      <c r="N23" s="7">
        <v>1.5537796675585</v>
      </c>
      <c r="O23" s="7">
        <v>800.82045802722</v>
      </c>
      <c r="P23" s="7">
        <v>934.202056196148</v>
      </c>
      <c r="Q23" s="7">
        <v>707.803079157042</v>
      </c>
      <c r="R23" s="7">
        <v>508.518463938863</v>
      </c>
      <c r="S23" s="7">
        <v>503.235677521366</v>
      </c>
      <c r="T23" s="7">
        <v>557.900759713878</v>
      </c>
      <c r="U23" s="7">
        <v>519.420776634368</v>
      </c>
      <c r="V23" s="7">
        <v>837.669721546576</v>
      </c>
      <c r="W23" s="7">
        <v>790.850621058111</v>
      </c>
      <c r="X23" s="7">
        <v>1.40828992009347</v>
      </c>
      <c r="Y23" s="7">
        <v>4.34598715088305</v>
      </c>
      <c r="Z23" s="7">
        <v>0.0773962156199559</v>
      </c>
      <c r="AA23" s="7">
        <v>976.712278292888</v>
      </c>
      <c r="AB23" s="7">
        <v>1069.28816763011</v>
      </c>
      <c r="AC23" s="7">
        <v>828.373317082156</v>
      </c>
      <c r="AD23" s="7">
        <v>616.825484955774</v>
      </c>
      <c r="AE23" s="7">
        <v>617.9374546954</v>
      </c>
      <c r="AF23" s="7">
        <v>641.424886520315</v>
      </c>
      <c r="AG23" s="7">
        <v>630.170505068096</v>
      </c>
      <c r="AH23" s="7">
        <v>977.835571079609</v>
      </c>
      <c r="AI23" s="7">
        <v>854.750937552646</v>
      </c>
      <c r="AJ23" s="7">
        <v>0.044226074332073</v>
      </c>
      <c r="AK23" s="7">
        <v>1.60349927328434</v>
      </c>
      <c r="AL23" s="7">
        <v>4.31044691677835</v>
      </c>
      <c r="AM23" s="7">
        <v>848.99137507501</v>
      </c>
      <c r="AN23" s="7">
        <v>955.330553529281</v>
      </c>
      <c r="AO23" s="7">
        <v>758.595981900675</v>
      </c>
      <c r="AP23" s="7">
        <v>587.763541515721</v>
      </c>
      <c r="AQ23" s="7">
        <v>558.918175907692</v>
      </c>
      <c r="AR23" s="7">
        <v>607.61100979663</v>
      </c>
      <c r="AS23" s="7">
        <v>618.938534415894</v>
      </c>
      <c r="AT23" s="7">
        <v>935.551598791546</v>
      </c>
      <c r="AU23" s="7">
        <v>822.785046765811</v>
      </c>
      <c r="AV23" s="7">
        <v>0.974972255320154</v>
      </c>
      <c r="AW23" s="7">
        <v>-4.91712481866443</v>
      </c>
      <c r="AX23" s="7">
        <v>2.27321457882135</v>
      </c>
      <c r="AY23" s="7">
        <v>35.3811407466701</v>
      </c>
      <c r="AZ23" s="7">
        <v>8.05772500693001</v>
      </c>
      <c r="BA23" s="7">
        <v>1.76139608220774</v>
      </c>
      <c r="BB23" s="7">
        <v>-1.80973489659436</v>
      </c>
      <c r="BC23" s="7">
        <v>3.85669686870096</v>
      </c>
      <c r="BD23" s="7">
        <v>-1.38509237682638</v>
      </c>
      <c r="BE23" s="7">
        <v>-3.67807869225999</v>
      </c>
      <c r="BF23" s="7">
        <v>-2.65326509252418</v>
      </c>
      <c r="BG23" s="7">
        <v>0.956725184435982</v>
      </c>
      <c r="BH23" s="7">
        <v>1.44285667756776</v>
      </c>
      <c r="BI23" s="7">
        <v>3.50822426362174</v>
      </c>
      <c r="BJ23" s="7">
        <v>-2.60871085746885</v>
      </c>
      <c r="BK23" s="7">
        <v>31.0218539246207</v>
      </c>
      <c r="BL23" s="7">
        <v>10.4578307749553</v>
      </c>
      <c r="BM23" s="7">
        <v>-2.31449299640326</v>
      </c>
      <c r="BN23" s="7">
        <v>-1.85919097699116</v>
      </c>
      <c r="BO23" s="7">
        <v>-2.59800030553242</v>
      </c>
      <c r="BP23" s="7">
        <v>-4.22662220443681</v>
      </c>
      <c r="BQ23" s="7">
        <v>-2.63901845268174</v>
      </c>
      <c r="BR23" s="7">
        <v>0.404939383650344</v>
      </c>
      <c r="BS23" s="7">
        <v>-2.99225207646759</v>
      </c>
      <c r="BT23" s="7">
        <v>4.00968149546952</v>
      </c>
      <c r="BU23" s="7">
        <v>2.19409103159433</v>
      </c>
      <c r="BV23" s="7">
        <v>-3.0527243615843</v>
      </c>
      <c r="BW23" s="7">
        <v>36.0930159172449</v>
      </c>
      <c r="BX23" s="7">
        <v>8.73451198691146</v>
      </c>
      <c r="BY23" s="7">
        <v>-4.78629327735371</v>
      </c>
      <c r="BZ23" s="7">
        <v>-2.30628526424471</v>
      </c>
      <c r="CA23" s="7">
        <v>-1.29932288286182</v>
      </c>
      <c r="CB23" s="7">
        <v>-5.77579557663876</v>
      </c>
      <c r="CC23" s="7">
        <v>2.6539172341345</v>
      </c>
      <c r="CD23" s="7">
        <v>1.30316261839926</v>
      </c>
      <c r="CE23" s="7">
        <v>0.847797051041198</v>
      </c>
      <c r="CF23" s="7">
        <v>0.808814712417188</v>
      </c>
      <c r="CG23" s="7">
        <v>-0.424842574812828</v>
      </c>
      <c r="CH23" s="7">
        <v>1.69647056325584</v>
      </c>
      <c r="CI23" s="7">
        <v>31.2167580110163</v>
      </c>
      <c r="CJ23" s="7">
        <v>4.56325074095275</v>
      </c>
      <c r="CK23" s="7">
        <v>0.41880628575791</v>
      </c>
      <c r="CL23" s="7">
        <v>-1.67477164138882</v>
      </c>
      <c r="CM23" s="7">
        <v>0.536066323921659</v>
      </c>
      <c r="CN23" s="7">
        <v>-5.48525327459538</v>
      </c>
      <c r="CO23" s="7">
        <v>1.35743593350708</v>
      </c>
      <c r="CP23" s="7">
        <v>-0.446311211854663</v>
      </c>
      <c r="CQ23" s="7">
        <v>-0.592194202151859</v>
      </c>
      <c r="CR23" s="7">
        <v>1.78438174574103</v>
      </c>
      <c r="CS23" s="7">
        <v>-2.41551857677905</v>
      </c>
      <c r="CT23" s="7">
        <v>-0.572970998856363</v>
      </c>
    </row>
    <row r="24" spans="2:98" ht="15" customHeight="true">
      <c r="B24" s="6">
        <v>23</v>
      </c>
      <c r="C24" s="7">
        <v>994.894302456669</v>
      </c>
      <c r="D24" s="7">
        <v>933.316261763504</v>
      </c>
      <c r="E24" s="7">
        <v>916.225309423669</v>
      </c>
      <c r="F24" s="7">
        <v>752.645868033217</v>
      </c>
      <c r="G24" s="7">
        <v>704.98331179322</v>
      </c>
      <c r="H24" s="7">
        <v>787.727907531232</v>
      </c>
      <c r="I24" s="7">
        <v>771.734303906226</v>
      </c>
      <c r="J24" s="7">
        <v>1027.96888770994</v>
      </c>
      <c r="K24" s="7">
        <v>1014.7340959596</v>
      </c>
      <c r="L24" s="7">
        <v>1.359162243627</v>
      </c>
      <c r="M24" s="7">
        <v>-0.569537043059427</v>
      </c>
      <c r="N24" s="7">
        <v>-1.22557798812159</v>
      </c>
      <c r="O24" s="7">
        <v>902.106546057785</v>
      </c>
      <c r="P24" s="7">
        <v>1051.60104269997</v>
      </c>
      <c r="Q24" s="7">
        <v>872.780979819146</v>
      </c>
      <c r="R24" s="7">
        <v>704.407160883131</v>
      </c>
      <c r="S24" s="7">
        <v>688.761241431638</v>
      </c>
      <c r="T24" s="7">
        <v>750.192084255695</v>
      </c>
      <c r="U24" s="7">
        <v>713.379806869737</v>
      </c>
      <c r="V24" s="7">
        <v>996.276251975762</v>
      </c>
      <c r="W24" s="7">
        <v>955.609419687093</v>
      </c>
      <c r="X24" s="7">
        <v>-5.36671346962885</v>
      </c>
      <c r="Y24" s="7">
        <v>6.13073605173304</v>
      </c>
      <c r="Z24" s="7">
        <v>-1.50853529874257</v>
      </c>
      <c r="AA24" s="7">
        <v>1096.35001987504</v>
      </c>
      <c r="AB24" s="7">
        <v>1195.95870464867</v>
      </c>
      <c r="AC24" s="7">
        <v>1020.19291833255</v>
      </c>
      <c r="AD24" s="7">
        <v>835.517762182294</v>
      </c>
      <c r="AE24" s="7">
        <v>839.970387456708</v>
      </c>
      <c r="AF24" s="7">
        <v>863.035089468002</v>
      </c>
      <c r="AG24" s="7">
        <v>859.910688128609</v>
      </c>
      <c r="AH24" s="7">
        <v>1152.83171428999</v>
      </c>
      <c r="AI24" s="7">
        <v>1026.34977080971</v>
      </c>
      <c r="AJ24" s="7">
        <v>-2.17053239278812</v>
      </c>
      <c r="AK24" s="7">
        <v>1.76032720108788</v>
      </c>
      <c r="AL24" s="7">
        <v>1.70818928925428</v>
      </c>
      <c r="AM24" s="7">
        <v>955.045778440387</v>
      </c>
      <c r="AN24" s="7">
        <v>1067.61278805639</v>
      </c>
      <c r="AO24" s="7">
        <v>929.728866623941</v>
      </c>
      <c r="AP24" s="7">
        <v>797.968872439575</v>
      </c>
      <c r="AQ24" s="7">
        <v>757.85007692744</v>
      </c>
      <c r="AR24" s="7">
        <v>813.80574771082</v>
      </c>
      <c r="AS24" s="7">
        <v>831.639966076504</v>
      </c>
      <c r="AT24" s="7">
        <v>1098.98416098818</v>
      </c>
      <c r="AU24" s="7">
        <v>988.642514417362</v>
      </c>
      <c r="AV24" s="7">
        <v>0.14345142295997</v>
      </c>
      <c r="AW24" s="7">
        <v>3.87874192151912</v>
      </c>
      <c r="AX24" s="7">
        <v>3.16387253465109</v>
      </c>
      <c r="AY24" s="7">
        <v>67.2221501298695</v>
      </c>
      <c r="AZ24" s="7">
        <v>16.2057156157857</v>
      </c>
      <c r="BA24" s="7">
        <v>-3.68328990306009</v>
      </c>
      <c r="BB24" s="7">
        <v>-1.06985567855418</v>
      </c>
      <c r="BC24" s="7">
        <v>0.695754171807948</v>
      </c>
      <c r="BD24" s="7">
        <v>0.385025093579316</v>
      </c>
      <c r="BE24" s="7">
        <v>-1.2342526954435</v>
      </c>
      <c r="BF24" s="7">
        <v>5.74252461540118</v>
      </c>
      <c r="BG24" s="7">
        <v>6.16883087968199</v>
      </c>
      <c r="BH24" s="7">
        <v>0.132161910875766</v>
      </c>
      <c r="BI24" s="7">
        <v>3.96566874893097</v>
      </c>
      <c r="BJ24" s="7">
        <v>-0.352144347140438</v>
      </c>
      <c r="BK24" s="7">
        <v>56.2129908467105</v>
      </c>
      <c r="BL24" s="7">
        <v>12.3397489094241</v>
      </c>
      <c r="BM24" s="7">
        <v>0.649473360593674</v>
      </c>
      <c r="BN24" s="7">
        <v>1.96852819833748</v>
      </c>
      <c r="BO24" s="7">
        <v>2.78917707903156</v>
      </c>
      <c r="BP24" s="7">
        <v>-0.314110849017652</v>
      </c>
      <c r="BQ24" s="7">
        <v>5.72776662010574</v>
      </c>
      <c r="BR24" s="7">
        <v>4.54796901409009</v>
      </c>
      <c r="BS24" s="7">
        <v>0.245219756533515</v>
      </c>
      <c r="BT24" s="7">
        <v>0.643966029499097</v>
      </c>
      <c r="BU24" s="7">
        <v>0.125817318560621</v>
      </c>
      <c r="BV24" s="7">
        <v>0.358387249666521</v>
      </c>
      <c r="BW24" s="7">
        <v>63.1491565263127</v>
      </c>
      <c r="BX24" s="7">
        <v>12.1068277418062</v>
      </c>
      <c r="BY24" s="7">
        <v>-1.05946094617366</v>
      </c>
      <c r="BZ24" s="7">
        <v>3.06225061329269</v>
      </c>
      <c r="CA24" s="7">
        <v>-1.55851371523295</v>
      </c>
      <c r="CB24" s="7">
        <v>-3.10428142314186</v>
      </c>
      <c r="CC24" s="7">
        <v>1.99578949549232</v>
      </c>
      <c r="CD24" s="7">
        <v>-0.221042885018505</v>
      </c>
      <c r="CE24" s="7">
        <v>-0.394803366313226</v>
      </c>
      <c r="CF24" s="7">
        <v>-1.57110469295048</v>
      </c>
      <c r="CG24" s="7">
        <v>-0.638825051780259</v>
      </c>
      <c r="CH24" s="7">
        <v>-0.878847800340736</v>
      </c>
      <c r="CI24" s="7">
        <v>54.7113217204387</v>
      </c>
      <c r="CJ24" s="7">
        <v>14.0442221615917</v>
      </c>
      <c r="CK24" s="7">
        <v>1.8735746894813</v>
      </c>
      <c r="CL24" s="7">
        <v>2.19179944488951</v>
      </c>
      <c r="CM24" s="7">
        <v>1.02763735703593</v>
      </c>
      <c r="CN24" s="7">
        <v>1.21126054243769</v>
      </c>
      <c r="CO24" s="7">
        <v>-0.390637478686131</v>
      </c>
      <c r="CP24" s="7">
        <v>-3.13079426389959</v>
      </c>
      <c r="CQ24" s="7">
        <v>-5.1145141439556</v>
      </c>
      <c r="CR24" s="7">
        <v>-2.15865295690901</v>
      </c>
      <c r="CS24" s="7">
        <v>0.727153471911606</v>
      </c>
      <c r="CT24" s="7">
        <v>-1.46764802890993</v>
      </c>
    </row>
    <row r="25" spans="2:98" ht="15" customHeight="true">
      <c r="B25" s="6">
        <v>24</v>
      </c>
      <c r="C25" s="7">
        <v>1070.42778722693</v>
      </c>
      <c r="D25" s="7">
        <v>996.949086430542</v>
      </c>
      <c r="E25" s="7">
        <v>1056.14328857334</v>
      </c>
      <c r="F25" s="7">
        <v>919.683058196556</v>
      </c>
      <c r="G25" s="7">
        <v>875.447678330976</v>
      </c>
      <c r="H25" s="7">
        <v>969.04773363563</v>
      </c>
      <c r="I25" s="7">
        <v>952.055262934299</v>
      </c>
      <c r="J25" s="7">
        <v>1144.91426399952</v>
      </c>
      <c r="K25" s="7">
        <v>1136.04299534463</v>
      </c>
      <c r="L25" s="7">
        <v>4.65937402947156</v>
      </c>
      <c r="M25" s="7">
        <v>-0.340323659720525</v>
      </c>
      <c r="N25" s="7">
        <v>-1.36957737788498</v>
      </c>
      <c r="O25" s="7">
        <v>968.616141229992</v>
      </c>
      <c r="P25" s="7">
        <v>1132.29520704104</v>
      </c>
      <c r="Q25" s="7">
        <v>995.794516883124</v>
      </c>
      <c r="R25" s="7">
        <v>883.297060861911</v>
      </c>
      <c r="S25" s="7">
        <v>862.923608313294</v>
      </c>
      <c r="T25" s="7">
        <v>916.21130250085</v>
      </c>
      <c r="U25" s="7">
        <v>890.440800382181</v>
      </c>
      <c r="V25" s="7">
        <v>1112.20565277362</v>
      </c>
      <c r="W25" s="7">
        <v>1080.32720355181</v>
      </c>
      <c r="X25" s="7">
        <v>1.07747050109083</v>
      </c>
      <c r="Y25" s="7">
        <v>0.882836980165848</v>
      </c>
      <c r="Z25" s="7">
        <v>-0.761375422380752</v>
      </c>
      <c r="AA25" s="7">
        <v>1178.42599803008</v>
      </c>
      <c r="AB25" s="7">
        <v>1279.22607621128</v>
      </c>
      <c r="AC25" s="7">
        <v>1167.55607365845</v>
      </c>
      <c r="AD25" s="7">
        <v>1029.66449149621</v>
      </c>
      <c r="AE25" s="7">
        <v>1039.39466262421</v>
      </c>
      <c r="AF25" s="7">
        <v>1054.34618946433</v>
      </c>
      <c r="AG25" s="7">
        <v>1066.61403453813</v>
      </c>
      <c r="AH25" s="7">
        <v>1280.52461147386</v>
      </c>
      <c r="AI25" s="7">
        <v>1154.13044326156</v>
      </c>
      <c r="AJ25" s="7">
        <v>1.84355574090614</v>
      </c>
      <c r="AK25" s="7">
        <v>2.24380077385467</v>
      </c>
      <c r="AL25" s="7">
        <v>1.00627260125975</v>
      </c>
      <c r="AM25" s="7">
        <v>1026.88363202673</v>
      </c>
      <c r="AN25" s="7">
        <v>1143.40022904691</v>
      </c>
      <c r="AO25" s="7">
        <v>1059.75003406221</v>
      </c>
      <c r="AP25" s="7">
        <v>984.713308385937</v>
      </c>
      <c r="AQ25" s="7">
        <v>933.666660706798</v>
      </c>
      <c r="AR25" s="7">
        <v>990.112348660111</v>
      </c>
      <c r="AS25" s="7">
        <v>1021.16890409343</v>
      </c>
      <c r="AT25" s="7">
        <v>1214.62435933794</v>
      </c>
      <c r="AU25" s="7">
        <v>1113.03804775783</v>
      </c>
      <c r="AV25" s="7">
        <v>-1.2263782690834</v>
      </c>
      <c r="AW25" s="7">
        <v>-2.56696580414791</v>
      </c>
      <c r="AX25" s="7">
        <v>2.70355719580039</v>
      </c>
      <c r="AY25" s="7">
        <v>120.299384036531</v>
      </c>
      <c r="AZ25" s="7">
        <v>29.7306550590683</v>
      </c>
      <c r="BA25" s="7">
        <v>-0.432761542188473</v>
      </c>
      <c r="BB25" s="7">
        <v>-4.96197806794226</v>
      </c>
      <c r="BC25" s="7">
        <v>-2.71683919820953</v>
      </c>
      <c r="BD25" s="7">
        <v>-5.31003191907939</v>
      </c>
      <c r="BE25" s="7">
        <v>0.367752780606679</v>
      </c>
      <c r="BF25" s="7">
        <v>-2.02256764229787</v>
      </c>
      <c r="BG25" s="7">
        <v>3.66679479955337</v>
      </c>
      <c r="BH25" s="7">
        <v>0.038177650443231</v>
      </c>
      <c r="BI25" s="7">
        <v>1.82581405725023</v>
      </c>
      <c r="BJ25" s="7">
        <v>-2.42525543227657</v>
      </c>
      <c r="BK25" s="7">
        <v>107.805854173798</v>
      </c>
      <c r="BL25" s="7">
        <v>26.3672357596056</v>
      </c>
      <c r="BM25" s="7">
        <v>-1.37342733807191</v>
      </c>
      <c r="BN25" s="7">
        <v>-0.999871593560329</v>
      </c>
      <c r="BO25" s="7">
        <v>-0.28350194342147</v>
      </c>
      <c r="BP25" s="7">
        <v>-4.77214814839226</v>
      </c>
      <c r="BQ25" s="7">
        <v>1.29013412517998</v>
      </c>
      <c r="BR25" s="7">
        <v>2.13120953976295</v>
      </c>
      <c r="BS25" s="7">
        <v>0.0590805125943916</v>
      </c>
      <c r="BT25" s="7">
        <v>-3.79986892158786</v>
      </c>
      <c r="BU25" s="7">
        <v>-0.66005094008824</v>
      </c>
      <c r="BV25" s="7">
        <v>-0.364008796389953</v>
      </c>
      <c r="BW25" s="7">
        <v>122.510893966647</v>
      </c>
      <c r="BX25" s="7">
        <v>31.9931157377673</v>
      </c>
      <c r="BY25" s="7">
        <v>-3.13188050295003</v>
      </c>
      <c r="BZ25" s="7">
        <v>3.86353363978242</v>
      </c>
      <c r="CA25" s="7">
        <v>-2.09539311365597</v>
      </c>
      <c r="CB25" s="7">
        <v>0.67987576833093</v>
      </c>
      <c r="CC25" s="7">
        <v>1.36200828068877</v>
      </c>
      <c r="CD25" s="7">
        <v>1.79520466554277</v>
      </c>
      <c r="CE25" s="7">
        <v>4.68438205487109</v>
      </c>
      <c r="CF25" s="7">
        <v>1.18846031611565</v>
      </c>
      <c r="CG25" s="7">
        <v>1.72998233650105</v>
      </c>
      <c r="CH25" s="7">
        <v>-1.8555902500002</v>
      </c>
      <c r="CI25" s="7">
        <v>103.428435530727</v>
      </c>
      <c r="CJ25" s="7">
        <v>30.2137050691813</v>
      </c>
      <c r="CK25" s="7">
        <v>-1.36959479371444</v>
      </c>
      <c r="CL25" s="7">
        <v>-4.17377298646034</v>
      </c>
      <c r="CM25" s="7">
        <v>-0.909698105807365</v>
      </c>
      <c r="CN25" s="7">
        <v>0.0748675970753538</v>
      </c>
      <c r="CO25" s="7">
        <v>-2.63955995058541</v>
      </c>
      <c r="CP25" s="7">
        <v>0.55860512064919</v>
      </c>
      <c r="CQ25" s="7">
        <v>5.38088678190616</v>
      </c>
      <c r="CR25" s="7">
        <v>-0.73876473297878</v>
      </c>
      <c r="CS25" s="7">
        <v>-1.46864917945504</v>
      </c>
      <c r="CT25" s="7">
        <v>0.785590374445292</v>
      </c>
    </row>
    <row r="26" spans="2:98" ht="15" customHeight="true">
      <c r="B26" s="6">
        <v>25</v>
      </c>
      <c r="C26" s="7">
        <v>1121.27117378833</v>
      </c>
      <c r="D26" s="7">
        <v>1039.82295620791</v>
      </c>
      <c r="E26" s="7">
        <v>1156.12881172509</v>
      </c>
      <c r="F26" s="7">
        <v>1046.18080442806</v>
      </c>
      <c r="G26" s="7">
        <v>1009.97612009094</v>
      </c>
      <c r="H26" s="7">
        <v>1109.5999882928</v>
      </c>
      <c r="I26" s="7">
        <v>1091.35561718636</v>
      </c>
      <c r="J26" s="7">
        <v>1223.80339519039</v>
      </c>
      <c r="K26" s="7">
        <v>1218.08402642951</v>
      </c>
      <c r="L26" s="7">
        <v>1.87654245565318</v>
      </c>
      <c r="M26" s="7">
        <v>2.97386208675653</v>
      </c>
      <c r="N26" s="7">
        <v>1.23067327631043</v>
      </c>
      <c r="O26" s="7">
        <v>1015.90948166643</v>
      </c>
      <c r="P26" s="7">
        <v>1182.32236472042</v>
      </c>
      <c r="Q26" s="7">
        <v>1083.88661515084</v>
      </c>
      <c r="R26" s="7">
        <v>1026.60133997879</v>
      </c>
      <c r="S26" s="7">
        <v>1002.70694769596</v>
      </c>
      <c r="T26" s="7">
        <v>1044.46697979935</v>
      </c>
      <c r="U26" s="7">
        <v>1028.92512276062</v>
      </c>
      <c r="V26" s="7">
        <v>1192.57539316652</v>
      </c>
      <c r="W26" s="7">
        <v>1169.39349189513</v>
      </c>
      <c r="X26" s="7">
        <v>1.67584433687307</v>
      </c>
      <c r="Y26" s="7">
        <v>4.3217950596013</v>
      </c>
      <c r="Z26" s="7">
        <v>0.710209430555551</v>
      </c>
      <c r="AA26" s="7">
        <v>1229.67742200035</v>
      </c>
      <c r="AB26" s="7">
        <v>1312.27318719473</v>
      </c>
      <c r="AC26" s="7">
        <v>1271.012551534</v>
      </c>
      <c r="AD26" s="7">
        <v>1177.57029264836</v>
      </c>
      <c r="AE26" s="7">
        <v>1197.83784158612</v>
      </c>
      <c r="AF26" s="7">
        <v>1201.78590200646</v>
      </c>
      <c r="AG26" s="7">
        <v>1230.26772308218</v>
      </c>
      <c r="AH26" s="7">
        <v>1365.54865824506</v>
      </c>
      <c r="AI26" s="7">
        <v>1240.20353234551</v>
      </c>
      <c r="AJ26" s="7">
        <v>2.51718202532675</v>
      </c>
      <c r="AK26" s="7">
        <v>4.73679580131284</v>
      </c>
      <c r="AL26" s="7">
        <v>4.76761761737771</v>
      </c>
      <c r="AM26" s="7">
        <v>1073.44086813516</v>
      </c>
      <c r="AN26" s="7">
        <v>1191.82169772904</v>
      </c>
      <c r="AO26" s="7">
        <v>1151.66644279786</v>
      </c>
      <c r="AP26" s="7">
        <v>1128.73169978792</v>
      </c>
      <c r="AQ26" s="7">
        <v>1074.4219437281</v>
      </c>
      <c r="AR26" s="7">
        <v>1126.03194223569</v>
      </c>
      <c r="AS26" s="7">
        <v>1165.7860082177</v>
      </c>
      <c r="AT26" s="7">
        <v>1291.04917818644</v>
      </c>
      <c r="AU26" s="7">
        <v>1197.8863133803</v>
      </c>
      <c r="AV26" s="7">
        <v>0.776693301376781</v>
      </c>
      <c r="AW26" s="7">
        <v>4.09197763848124</v>
      </c>
      <c r="AX26" s="7">
        <v>-2.45135136921454</v>
      </c>
      <c r="AY26" s="7">
        <v>208.558710236151</v>
      </c>
      <c r="AZ26" s="7">
        <v>59.1826375842688</v>
      </c>
      <c r="BA26" s="7">
        <v>5.16856197743891</v>
      </c>
      <c r="BB26" s="7">
        <v>2.03470285651792</v>
      </c>
      <c r="BC26" s="7">
        <v>1.3123687813395</v>
      </c>
      <c r="BD26" s="7">
        <v>-3.57836666602952</v>
      </c>
      <c r="BE26" s="7">
        <v>-2.95775556834815</v>
      </c>
      <c r="BF26" s="7">
        <v>-0.630492826435329</v>
      </c>
      <c r="BG26" s="7">
        <v>1.75761464373181</v>
      </c>
      <c r="BH26" s="7">
        <v>3.49011462315184</v>
      </c>
      <c r="BI26" s="7">
        <v>3.77999659797206</v>
      </c>
      <c r="BJ26" s="7">
        <v>3.96482497073339</v>
      </c>
      <c r="BK26" s="7">
        <v>185.452343072282</v>
      </c>
      <c r="BL26" s="7">
        <v>56.7544968222</v>
      </c>
      <c r="BM26" s="7">
        <v>0.123717604699777</v>
      </c>
      <c r="BN26" s="7">
        <v>8.03713361828341</v>
      </c>
      <c r="BO26" s="7">
        <v>-0.980814154796008</v>
      </c>
      <c r="BP26" s="7">
        <v>-1.23906015120201</v>
      </c>
      <c r="BQ26" s="7">
        <v>1.31532768825673</v>
      </c>
      <c r="BR26" s="7">
        <v>1.9084888435973</v>
      </c>
      <c r="BS26" s="7">
        <v>3.5472276989658</v>
      </c>
      <c r="BT26" s="7">
        <v>1.78074396518787</v>
      </c>
      <c r="BU26" s="7">
        <v>6.95277649214404</v>
      </c>
      <c r="BV26" s="7">
        <v>0.622268910226012</v>
      </c>
      <c r="BW26" s="7">
        <v>202.731374647364</v>
      </c>
      <c r="BX26" s="7">
        <v>54.4653932368474</v>
      </c>
      <c r="BY26" s="7">
        <v>-4.70194459316417</v>
      </c>
      <c r="BZ26" s="7">
        <v>3.01494292162897</v>
      </c>
      <c r="CA26" s="7">
        <v>3.43175133071691</v>
      </c>
      <c r="CB26" s="7">
        <v>-2.27447855588753</v>
      </c>
      <c r="CC26" s="7">
        <v>2.20065454227779</v>
      </c>
      <c r="CD26" s="7">
        <v>5.03464727315441</v>
      </c>
      <c r="CE26" s="7">
        <v>1.39641319553039</v>
      </c>
      <c r="CF26" s="7">
        <v>0.147813032436716</v>
      </c>
      <c r="CG26" s="7">
        <v>1.80557230229806</v>
      </c>
      <c r="CH26" s="7">
        <v>2.02417935439007</v>
      </c>
      <c r="CI26" s="7">
        <v>174.406846259184</v>
      </c>
      <c r="CJ26" s="7">
        <v>59.7255596804894</v>
      </c>
      <c r="CK26" s="7">
        <v>-0.333207808196221</v>
      </c>
      <c r="CL26" s="7">
        <v>5.32166584267998</v>
      </c>
      <c r="CM26" s="7">
        <v>5.01237613100284</v>
      </c>
      <c r="CN26" s="7">
        <v>1.4204323702761</v>
      </c>
      <c r="CO26" s="7">
        <v>1.18840390307969</v>
      </c>
      <c r="CP26" s="7">
        <v>1.29917635843367</v>
      </c>
      <c r="CQ26" s="7">
        <v>6.51323896348595</v>
      </c>
      <c r="CR26" s="7">
        <v>0.553471932380944</v>
      </c>
      <c r="CS26" s="7">
        <v>2.72610162210412</v>
      </c>
      <c r="CT26" s="7">
        <v>2.07057043448913</v>
      </c>
    </row>
    <row r="27" spans="2:98" ht="15" customHeight="true">
      <c r="B27" s="6">
        <v>26</v>
      </c>
      <c r="C27" s="7">
        <v>1153.46325983138</v>
      </c>
      <c r="D27" s="7">
        <v>1066.10872524981</v>
      </c>
      <c r="E27" s="7">
        <v>1223.64631312766</v>
      </c>
      <c r="F27" s="7">
        <v>1135.83810998086</v>
      </c>
      <c r="G27" s="7">
        <v>1106.45758911505</v>
      </c>
      <c r="H27" s="7">
        <v>1209.24161920285</v>
      </c>
      <c r="I27" s="7">
        <v>1185.0449496793</v>
      </c>
      <c r="J27" s="7">
        <v>1275.3005948907</v>
      </c>
      <c r="K27" s="7">
        <v>1270.96700109765</v>
      </c>
      <c r="L27" s="7">
        <v>0.0504456161957023</v>
      </c>
      <c r="M27" s="7">
        <v>0.502000458431667</v>
      </c>
      <c r="N27" s="7">
        <v>-0.27556734554355</v>
      </c>
      <c r="O27" s="7">
        <v>1041.75288643751</v>
      </c>
      <c r="P27" s="7">
        <v>1212.70542578217</v>
      </c>
      <c r="Q27" s="7">
        <v>1141.2728321121</v>
      </c>
      <c r="R27" s="7">
        <v>1128.50512837269</v>
      </c>
      <c r="S27" s="7">
        <v>1105.465989625</v>
      </c>
      <c r="T27" s="7">
        <v>1137.58765080046</v>
      </c>
      <c r="U27" s="7">
        <v>1129.29238555356</v>
      </c>
      <c r="V27" s="7">
        <v>1244.05389895613</v>
      </c>
      <c r="W27" s="7">
        <v>1228.37030101158</v>
      </c>
      <c r="X27" s="7">
        <v>7.0067699052006</v>
      </c>
      <c r="Y27" s="7">
        <v>3.9295162664007</v>
      </c>
      <c r="Z27" s="7">
        <v>4.94785742018803</v>
      </c>
      <c r="AA27" s="7">
        <v>1265.29888220206</v>
      </c>
      <c r="AB27" s="7">
        <v>1339.51923207726</v>
      </c>
      <c r="AC27" s="7">
        <v>1338.18436744609</v>
      </c>
      <c r="AD27" s="7">
        <v>1282.40045847973</v>
      </c>
      <c r="AE27" s="7">
        <v>1307.94984982326</v>
      </c>
      <c r="AF27" s="7">
        <v>1302.87994752792</v>
      </c>
      <c r="AG27" s="7">
        <v>1346.59223964261</v>
      </c>
      <c r="AH27" s="7">
        <v>1423.36455631952</v>
      </c>
      <c r="AI27" s="7">
        <v>1295.83288240971</v>
      </c>
      <c r="AJ27" s="7">
        <v>2.00680868301743</v>
      </c>
      <c r="AK27" s="7">
        <v>4.8666086286089</v>
      </c>
      <c r="AL27" s="7">
        <v>6.42766138794241</v>
      </c>
      <c r="AM27" s="7">
        <v>1103.09539446488</v>
      </c>
      <c r="AN27" s="7">
        <v>1220.72594383104</v>
      </c>
      <c r="AO27" s="7">
        <v>1211.11515514663</v>
      </c>
      <c r="AP27" s="7">
        <v>1228.86212953948</v>
      </c>
      <c r="AQ27" s="7">
        <v>1174.3539573217</v>
      </c>
      <c r="AR27" s="7">
        <v>1219.0910396378</v>
      </c>
      <c r="AS27" s="7">
        <v>1267.7083550763</v>
      </c>
      <c r="AT27" s="7">
        <v>1353.52279246975</v>
      </c>
      <c r="AU27" s="7">
        <v>1254.31120306544</v>
      </c>
      <c r="AV27" s="7">
        <v>-2.74319510040505</v>
      </c>
      <c r="AW27" s="7">
        <v>-0.739448482739135</v>
      </c>
      <c r="AX27" s="7">
        <v>1.9283919999084</v>
      </c>
      <c r="AY27" s="7">
        <v>333.254270752884</v>
      </c>
      <c r="AZ27" s="7">
        <v>100.110167038643</v>
      </c>
      <c r="BA27" s="7">
        <v>12.9325564853511</v>
      </c>
      <c r="BB27" s="7">
        <v>9.22851392372786</v>
      </c>
      <c r="BC27" s="7">
        <v>1.5876981931433</v>
      </c>
      <c r="BD27" s="7">
        <v>5.32738802761378</v>
      </c>
      <c r="BE27" s="7">
        <v>2.16153889584666</v>
      </c>
      <c r="BF27" s="7">
        <v>1.31258192873929</v>
      </c>
      <c r="BG27" s="7">
        <v>-0.651215176259029</v>
      </c>
      <c r="BH27" s="7">
        <v>3.35859248671932</v>
      </c>
      <c r="BI27" s="7">
        <v>3.21451795325356</v>
      </c>
      <c r="BJ27" s="7">
        <v>-1.84517150290685</v>
      </c>
      <c r="BK27" s="7">
        <v>296.150653927717</v>
      </c>
      <c r="BL27" s="7">
        <v>104.677690979247</v>
      </c>
      <c r="BM27" s="7">
        <v>4.00473710324832</v>
      </c>
      <c r="BN27" s="7">
        <v>8.71674175699445</v>
      </c>
      <c r="BO27" s="7">
        <v>2.30892056153698</v>
      </c>
      <c r="BP27" s="7">
        <v>5.07390108084337</v>
      </c>
      <c r="BQ27" s="7">
        <v>-0.615751497273322</v>
      </c>
      <c r="BR27" s="7">
        <v>5.17340601790147</v>
      </c>
      <c r="BS27" s="7">
        <v>-5.59649139611838</v>
      </c>
      <c r="BT27" s="7">
        <v>0.553358887135346</v>
      </c>
      <c r="BU27" s="7">
        <v>-2.74957521745455</v>
      </c>
      <c r="BV27" s="7">
        <v>-0.295120041818791</v>
      </c>
      <c r="BW27" s="7">
        <v>329.803745196575</v>
      </c>
      <c r="BX27" s="7">
        <v>108.509275889593</v>
      </c>
      <c r="BY27" s="7">
        <v>6.54019664406178</v>
      </c>
      <c r="BZ27" s="7">
        <v>8.06830262657877</v>
      </c>
      <c r="CA27" s="7">
        <v>3.40766488654663</v>
      </c>
      <c r="CB27" s="7">
        <v>1.82761902808761</v>
      </c>
      <c r="CC27" s="7">
        <v>0.0732460670246837</v>
      </c>
      <c r="CD27" s="7">
        <v>-6.79934807348991</v>
      </c>
      <c r="CE27" s="7">
        <v>-2.63945126258614</v>
      </c>
      <c r="CF27" s="7">
        <v>-1.24788054903638</v>
      </c>
      <c r="CG27" s="7">
        <v>-0.900614041307108</v>
      </c>
      <c r="CH27" s="7">
        <v>-0.17025042997966</v>
      </c>
      <c r="CI27" s="7">
        <v>281.075063328385</v>
      </c>
      <c r="CJ27" s="7">
        <v>105.830002355795</v>
      </c>
      <c r="CK27" s="7">
        <v>3.01042721749718</v>
      </c>
      <c r="CL27" s="7">
        <v>6.44583915852081</v>
      </c>
      <c r="CM27" s="7">
        <v>2.81436269827554</v>
      </c>
      <c r="CN27" s="7">
        <v>-0.395487644675086</v>
      </c>
      <c r="CO27" s="7">
        <v>7.13939075623966</v>
      </c>
      <c r="CP27" s="7">
        <v>0.058419218195013</v>
      </c>
      <c r="CQ27" s="7">
        <v>-2.08811777566643</v>
      </c>
      <c r="CR27" s="7">
        <v>8.72950866910833</v>
      </c>
      <c r="CS27" s="7">
        <v>-3.61328322805321</v>
      </c>
      <c r="CT27" s="7">
        <v>2.92043611108193</v>
      </c>
    </row>
    <row r="28" spans="2:98" ht="15" customHeight="true">
      <c r="B28" s="6">
        <v>27</v>
      </c>
      <c r="C28" s="7">
        <v>1176.45505128667</v>
      </c>
      <c r="D28" s="7">
        <v>1085.60366214684</v>
      </c>
      <c r="E28" s="7">
        <v>1266.16698568429</v>
      </c>
      <c r="F28" s="7">
        <v>1193.33239376984</v>
      </c>
      <c r="G28" s="7">
        <v>1176.14054124423</v>
      </c>
      <c r="H28" s="7">
        <v>1276.85139883478</v>
      </c>
      <c r="I28" s="7">
        <v>1247.79505552874</v>
      </c>
      <c r="J28" s="7">
        <v>1309.53076326484</v>
      </c>
      <c r="K28" s="7">
        <v>1304.53239543645</v>
      </c>
      <c r="L28" s="7">
        <v>-0.346284689203003</v>
      </c>
      <c r="M28" s="7">
        <v>-1.93019034662439</v>
      </c>
      <c r="N28" s="7">
        <v>3.2274244528312</v>
      </c>
      <c r="O28" s="7">
        <v>1059.62053568633</v>
      </c>
      <c r="P28" s="7">
        <v>1233.56519882053</v>
      </c>
      <c r="Q28" s="7">
        <v>1180.61849361723</v>
      </c>
      <c r="R28" s="7">
        <v>1199.00646992041</v>
      </c>
      <c r="S28" s="7">
        <v>1177.59694609622</v>
      </c>
      <c r="T28" s="7">
        <v>1202.27882476551</v>
      </c>
      <c r="U28" s="7">
        <v>1199.9624777968</v>
      </c>
      <c r="V28" s="7">
        <v>1277.62740078795</v>
      </c>
      <c r="W28" s="7">
        <v>1268.46713604188</v>
      </c>
      <c r="X28" s="7">
        <v>2.17271630419282</v>
      </c>
      <c r="Y28" s="7">
        <v>-1.09354016063935</v>
      </c>
      <c r="Z28" s="7">
        <v>3.16551882375779</v>
      </c>
      <c r="AA28" s="7">
        <v>1287.6714071091</v>
      </c>
      <c r="AB28" s="7">
        <v>1358.83731765865</v>
      </c>
      <c r="AC28" s="7">
        <v>1381.55244717301</v>
      </c>
      <c r="AD28" s="7">
        <v>1351.02359200946</v>
      </c>
      <c r="AE28" s="7">
        <v>1385.99089758346</v>
      </c>
      <c r="AF28" s="7">
        <v>1374.02293175479</v>
      </c>
      <c r="AG28" s="7">
        <v>1429.52472674382</v>
      </c>
      <c r="AH28" s="7">
        <v>1458.29092454419</v>
      </c>
      <c r="AI28" s="7">
        <v>1332.2017561227</v>
      </c>
      <c r="AJ28" s="7">
        <v>5.97072009503154</v>
      </c>
      <c r="AK28" s="7">
        <v>-0.708632336854862</v>
      </c>
      <c r="AL28" s="7">
        <v>-1.18504555622985</v>
      </c>
      <c r="AM28" s="7">
        <v>1123.53227343968</v>
      </c>
      <c r="AN28" s="7">
        <v>1243.24577222929</v>
      </c>
      <c r="AO28" s="7">
        <v>1249.86454806067</v>
      </c>
      <c r="AP28" s="7">
        <v>1297.22250099343</v>
      </c>
      <c r="AQ28" s="7">
        <v>1244.85497063434</v>
      </c>
      <c r="AR28" s="7">
        <v>1280.71707865705</v>
      </c>
      <c r="AS28" s="7">
        <v>1335.42563701991</v>
      </c>
      <c r="AT28" s="7">
        <v>1389.04488324206</v>
      </c>
      <c r="AU28" s="7">
        <v>1291.65483415796</v>
      </c>
      <c r="AV28" s="7">
        <v>2.73489200108088</v>
      </c>
      <c r="AW28" s="7">
        <v>0.200134974723369</v>
      </c>
      <c r="AX28" s="7">
        <v>0.577283372183956</v>
      </c>
      <c r="AY28" s="7">
        <v>490.95717312482</v>
      </c>
      <c r="AZ28" s="7">
        <v>193.007205111648</v>
      </c>
      <c r="BA28" s="7">
        <v>24.2902894986128</v>
      </c>
      <c r="BB28" s="7">
        <v>10.8194904973961</v>
      </c>
      <c r="BC28" s="7">
        <v>3.46300301698602</v>
      </c>
      <c r="BD28" s="7">
        <v>5.28725038473294</v>
      </c>
      <c r="BE28" s="7">
        <v>-0.2612472672281</v>
      </c>
      <c r="BF28" s="7">
        <v>-1.13977318244133</v>
      </c>
      <c r="BG28" s="7">
        <v>3.69567716489564</v>
      </c>
      <c r="BH28" s="7">
        <v>3.51620493950304</v>
      </c>
      <c r="BI28" s="7">
        <v>-1.3384868780854</v>
      </c>
      <c r="BJ28" s="7">
        <v>2.1571546104874</v>
      </c>
      <c r="BK28" s="7">
        <v>440.035758296982</v>
      </c>
      <c r="BL28" s="7">
        <v>174.178162304703</v>
      </c>
      <c r="BM28" s="7">
        <v>6.24708388362569</v>
      </c>
      <c r="BN28" s="7">
        <v>22.3957242047736</v>
      </c>
      <c r="BO28" s="7">
        <v>7.14581738531297</v>
      </c>
      <c r="BP28" s="7">
        <v>4.35587818170688</v>
      </c>
      <c r="BQ28" s="7">
        <v>-3.79195909898772</v>
      </c>
      <c r="BR28" s="7">
        <v>0.23984863638816</v>
      </c>
      <c r="BS28" s="7">
        <v>2.74415726067718</v>
      </c>
      <c r="BT28" s="7">
        <v>4.47977352391899</v>
      </c>
      <c r="BU28" s="7">
        <v>-3.54692231021681</v>
      </c>
      <c r="BV28" s="7">
        <v>-1.51332578870461</v>
      </c>
      <c r="BW28" s="7">
        <v>488.715561544215</v>
      </c>
      <c r="BX28" s="7">
        <v>183.578451494972</v>
      </c>
      <c r="BY28" s="7">
        <v>13.6115470939271</v>
      </c>
      <c r="BZ28" s="7">
        <v>13.9871190649033</v>
      </c>
      <c r="CA28" s="7">
        <v>3.63279882904044</v>
      </c>
      <c r="CB28" s="7">
        <v>4.43317739566055</v>
      </c>
      <c r="CC28" s="7">
        <v>0.385958291665247</v>
      </c>
      <c r="CD28" s="7">
        <v>-2.93221568103308</v>
      </c>
      <c r="CE28" s="7">
        <v>-1.77073639253013</v>
      </c>
      <c r="CF28" s="7">
        <v>-1.13559608776677</v>
      </c>
      <c r="CG28" s="7">
        <v>1.45670561561428</v>
      </c>
      <c r="CH28" s="7">
        <v>1.8448078791439</v>
      </c>
      <c r="CI28" s="7">
        <v>416.102645816225</v>
      </c>
      <c r="CJ28" s="7">
        <v>185.224350234855</v>
      </c>
      <c r="CK28" s="7">
        <v>7.8883252485889</v>
      </c>
      <c r="CL28" s="7">
        <v>17.6444545501045</v>
      </c>
      <c r="CM28" s="7">
        <v>11.385639196687</v>
      </c>
      <c r="CN28" s="7">
        <v>3.8348638890925</v>
      </c>
      <c r="CO28" s="7">
        <v>1.03580168024291</v>
      </c>
      <c r="CP28" s="7">
        <v>-5.38038718919506</v>
      </c>
      <c r="CQ28" s="7">
        <v>-0.746700631640124</v>
      </c>
      <c r="CR28" s="7">
        <v>-2.23161106267889</v>
      </c>
      <c r="CS28" s="7">
        <v>-1.84716440882539</v>
      </c>
      <c r="CT28" s="7">
        <v>0.230593483340726</v>
      </c>
    </row>
    <row r="29" spans="2:98" ht="15" customHeight="true">
      <c r="B29" s="6">
        <v>28</v>
      </c>
      <c r="C29" s="7">
        <v>1191.70811165335</v>
      </c>
      <c r="D29" s="7">
        <v>1098.16853618906</v>
      </c>
      <c r="E29" s="7">
        <v>1295.1160992355</v>
      </c>
      <c r="F29" s="7">
        <v>1231.38278206621</v>
      </c>
      <c r="G29" s="7">
        <v>1224.37326019118</v>
      </c>
      <c r="H29" s="7">
        <v>1325.23608095029</v>
      </c>
      <c r="I29" s="7">
        <v>1285.43069082471</v>
      </c>
      <c r="J29" s="7">
        <v>1331.02002612937</v>
      </c>
      <c r="K29" s="7">
        <v>1324.84092018387</v>
      </c>
      <c r="L29" s="7">
        <v>-1.95041962178811</v>
      </c>
      <c r="M29" s="7">
        <v>2.75938345237682</v>
      </c>
      <c r="N29" s="7">
        <v>1.81293782098919</v>
      </c>
      <c r="O29" s="7">
        <v>1070.83808938319</v>
      </c>
      <c r="P29" s="7">
        <v>1246.23988316368</v>
      </c>
      <c r="Q29" s="7">
        <v>1203.58529720415</v>
      </c>
      <c r="R29" s="7">
        <v>1244.48038957184</v>
      </c>
      <c r="S29" s="7">
        <v>1226.99197775505</v>
      </c>
      <c r="T29" s="7">
        <v>1241.68938125264</v>
      </c>
      <c r="U29" s="7">
        <v>1246.66782322347</v>
      </c>
      <c r="V29" s="7">
        <v>1300.30059350749</v>
      </c>
      <c r="W29" s="7">
        <v>1292.9328554404</v>
      </c>
      <c r="X29" s="7">
        <v>2.94028030030722</v>
      </c>
      <c r="Y29" s="7">
        <v>0.298394576074315</v>
      </c>
      <c r="Z29" s="7">
        <v>-4.12570986264836</v>
      </c>
      <c r="AA29" s="7">
        <v>1300.04883158694</v>
      </c>
      <c r="AB29" s="7">
        <v>1370.62232764628</v>
      </c>
      <c r="AC29" s="7">
        <v>1407.85566390699</v>
      </c>
      <c r="AD29" s="7">
        <v>1397.97274566866</v>
      </c>
      <c r="AE29" s="7">
        <v>1435.07849109314</v>
      </c>
      <c r="AF29" s="7">
        <v>1419.69757194945</v>
      </c>
      <c r="AG29" s="7">
        <v>1482.44149014693</v>
      </c>
      <c r="AH29" s="7">
        <v>1479.32179593665</v>
      </c>
      <c r="AI29" s="7">
        <v>1354.50931058474</v>
      </c>
      <c r="AJ29" s="7">
        <v>-1.26738679078062</v>
      </c>
      <c r="AK29" s="7">
        <v>2.51647822246332</v>
      </c>
      <c r="AL29" s="7">
        <v>0.68576467415005</v>
      </c>
      <c r="AM29" s="7">
        <v>1134.50786388118</v>
      </c>
      <c r="AN29" s="7">
        <v>1255.31116236327</v>
      </c>
      <c r="AO29" s="7">
        <v>1274.80654744326</v>
      </c>
      <c r="AP29" s="7">
        <v>1339.97904728052</v>
      </c>
      <c r="AQ29" s="7">
        <v>1289.64701892947</v>
      </c>
      <c r="AR29" s="7">
        <v>1319.4324465381</v>
      </c>
      <c r="AS29" s="7">
        <v>1381.57870315002</v>
      </c>
      <c r="AT29" s="7">
        <v>1409.67500126765</v>
      </c>
      <c r="AU29" s="7">
        <v>1314.01465738732</v>
      </c>
      <c r="AV29" s="7">
        <v>-2.70014798532793</v>
      </c>
      <c r="AW29" s="7">
        <v>-2.40242366498705</v>
      </c>
      <c r="AX29" s="7">
        <v>1.15300853471035</v>
      </c>
      <c r="AY29" s="7">
        <v>648.445658347684</v>
      </c>
      <c r="AZ29" s="7">
        <v>300.4366636027</v>
      </c>
      <c r="BA29" s="7">
        <v>36.5402509664732</v>
      </c>
      <c r="BB29" s="7">
        <v>31.313736047799</v>
      </c>
      <c r="BC29" s="7">
        <v>12.8020203386982</v>
      </c>
      <c r="BD29" s="7">
        <v>9.87764699640866</v>
      </c>
      <c r="BE29" s="7">
        <v>0.201714738322607</v>
      </c>
      <c r="BF29" s="7">
        <v>-0.968256234420551</v>
      </c>
      <c r="BG29" s="7">
        <v>3.18763955178383</v>
      </c>
      <c r="BH29" s="7">
        <v>-1.95335502964099</v>
      </c>
      <c r="BI29" s="7">
        <v>3.44721479123564</v>
      </c>
      <c r="BJ29" s="7">
        <v>-0.649541500426949</v>
      </c>
      <c r="BK29" s="7">
        <v>583.465905658301</v>
      </c>
      <c r="BL29" s="7">
        <v>282.556040432573</v>
      </c>
      <c r="BM29" s="7">
        <v>24.0068070437969</v>
      </c>
      <c r="BN29" s="7">
        <v>30.9189599034462</v>
      </c>
      <c r="BO29" s="7">
        <v>12.4164160929126</v>
      </c>
      <c r="BP29" s="7">
        <v>10.7603500244804</v>
      </c>
      <c r="BQ29" s="7">
        <v>-0.109738481770364</v>
      </c>
      <c r="BR29" s="7">
        <v>1.68039469894256</v>
      </c>
      <c r="BS29" s="7">
        <v>-0.0386008716686774</v>
      </c>
      <c r="BT29" s="7">
        <v>-1.8118476925124</v>
      </c>
      <c r="BU29" s="7">
        <v>1.19139240822005</v>
      </c>
      <c r="BV29" s="7">
        <v>-0.148790575359726</v>
      </c>
      <c r="BW29" s="7">
        <v>643.709944938983</v>
      </c>
      <c r="BX29" s="7">
        <v>305.030607637457</v>
      </c>
      <c r="BY29" s="7">
        <v>22.6508624330145</v>
      </c>
      <c r="BZ29" s="7">
        <v>31.9072113692218</v>
      </c>
      <c r="CA29" s="7">
        <v>9.87937963329978</v>
      </c>
      <c r="CB29" s="7">
        <v>8.75748026579186</v>
      </c>
      <c r="CC29" s="7">
        <v>2.39064329764005</v>
      </c>
      <c r="CD29" s="7">
        <v>-1.95034469863322</v>
      </c>
      <c r="CE29" s="7">
        <v>-1.50414187072238</v>
      </c>
      <c r="CF29" s="7">
        <v>-0.394176177740974</v>
      </c>
      <c r="CG29" s="7">
        <v>-5.64369369792666</v>
      </c>
      <c r="CH29" s="7">
        <v>1.31606591345326</v>
      </c>
      <c r="CI29" s="7">
        <v>548.580830305722</v>
      </c>
      <c r="CJ29" s="7">
        <v>296.544705810968</v>
      </c>
      <c r="CK29" s="7">
        <v>24.5572194444271</v>
      </c>
      <c r="CL29" s="7">
        <v>31.4929835842609</v>
      </c>
      <c r="CM29" s="7">
        <v>12.506345678557</v>
      </c>
      <c r="CN29" s="7">
        <v>12.7872602881434</v>
      </c>
      <c r="CO29" s="7">
        <v>0.1132707988736</v>
      </c>
      <c r="CP29" s="7">
        <v>0.343153877972782</v>
      </c>
      <c r="CQ29" s="7">
        <v>-0.389265932224589</v>
      </c>
      <c r="CR29" s="7">
        <v>1.0388728287403</v>
      </c>
      <c r="CS29" s="7">
        <v>-0.0671729704181416</v>
      </c>
      <c r="CT29" s="7">
        <v>-0.387848059541284</v>
      </c>
    </row>
    <row r="30" spans="2:98" ht="15" customHeight="true">
      <c r="B30" s="6">
        <v>29</v>
      </c>
      <c r="C30" s="7">
        <v>1200.17080887415</v>
      </c>
      <c r="D30" s="7">
        <v>1106.89450766067</v>
      </c>
      <c r="E30" s="7">
        <v>1315.29431015529</v>
      </c>
      <c r="F30" s="7">
        <v>1255.7217493954</v>
      </c>
      <c r="G30" s="7">
        <v>1255.61948427458</v>
      </c>
      <c r="H30" s="7">
        <v>1351.37467962538</v>
      </c>
      <c r="I30" s="7">
        <v>1312.62105514278</v>
      </c>
      <c r="J30" s="7">
        <v>1346.02525923996</v>
      </c>
      <c r="K30" s="7">
        <v>1337.84368558864</v>
      </c>
      <c r="L30" s="7">
        <v>-3.6718633691894</v>
      </c>
      <c r="M30" s="7">
        <v>1.07485380731214</v>
      </c>
      <c r="N30" s="7">
        <v>-0.323411766755726</v>
      </c>
      <c r="O30" s="7">
        <v>1079.69900147453</v>
      </c>
      <c r="P30" s="7">
        <v>1255.22436967865</v>
      </c>
      <c r="Q30" s="7">
        <v>1217.96933034606</v>
      </c>
      <c r="R30" s="7">
        <v>1274.88312819722</v>
      </c>
      <c r="S30" s="7">
        <v>1259.78132200313</v>
      </c>
      <c r="T30" s="7">
        <v>1264.87870847108</v>
      </c>
      <c r="U30" s="7">
        <v>1277.68996985162</v>
      </c>
      <c r="V30" s="7">
        <v>1312.72516571047</v>
      </c>
      <c r="W30" s="7">
        <v>1310.35923468565</v>
      </c>
      <c r="X30" s="7">
        <v>0.323168595901279</v>
      </c>
      <c r="Y30" s="7">
        <v>3.76173039764626</v>
      </c>
      <c r="Z30" s="7">
        <v>1.88227903771894</v>
      </c>
      <c r="AA30" s="7">
        <v>1309.12522171146</v>
      </c>
      <c r="AB30" s="7">
        <v>1379.06208937736</v>
      </c>
      <c r="AC30" s="7">
        <v>1422.191921254</v>
      </c>
      <c r="AD30" s="7">
        <v>1426.15630189937</v>
      </c>
      <c r="AE30" s="7">
        <v>1470.31480167384</v>
      </c>
      <c r="AF30" s="7">
        <v>1449.8245756067</v>
      </c>
      <c r="AG30" s="7">
        <v>1517.54556714424</v>
      </c>
      <c r="AH30" s="7">
        <v>1491.49901574117</v>
      </c>
      <c r="AI30" s="7">
        <v>1369.22700095344</v>
      </c>
      <c r="AJ30" s="7">
        <v>2.11922895993803</v>
      </c>
      <c r="AK30" s="7">
        <v>3.02717962898669</v>
      </c>
      <c r="AL30" s="7">
        <v>3.80243345856434</v>
      </c>
      <c r="AM30" s="7">
        <v>1141.15925346006</v>
      </c>
      <c r="AN30" s="7">
        <v>1263.93135648149</v>
      </c>
      <c r="AO30" s="7">
        <v>1292.0007295773</v>
      </c>
      <c r="AP30" s="7">
        <v>1368.52102649427</v>
      </c>
      <c r="AQ30" s="7">
        <v>1320.34724443676</v>
      </c>
      <c r="AR30" s="7">
        <v>1343.77578094916</v>
      </c>
      <c r="AS30" s="7">
        <v>1410.81536765032</v>
      </c>
      <c r="AT30" s="7">
        <v>1409.91715555857</v>
      </c>
      <c r="AU30" s="7">
        <v>1329.00682180949</v>
      </c>
      <c r="AV30" s="7">
        <v>0.232678565640981</v>
      </c>
      <c r="AW30" s="7">
        <v>-1.72520307551667</v>
      </c>
      <c r="AX30" s="7">
        <v>-2.66450575556337</v>
      </c>
      <c r="AY30" s="7">
        <v>800.704734024862</v>
      </c>
      <c r="AZ30" s="7">
        <v>454.676152147589</v>
      </c>
      <c r="BA30" s="7">
        <v>62.4055797108294</v>
      </c>
      <c r="BB30" s="7">
        <v>54.1544012738123</v>
      </c>
      <c r="BC30" s="7">
        <v>28.7650916289922</v>
      </c>
      <c r="BD30" s="7">
        <v>25.3407697348589</v>
      </c>
      <c r="BE30" s="7">
        <v>-4.37132739757908</v>
      </c>
      <c r="BF30" s="7">
        <v>1.17122560282223</v>
      </c>
      <c r="BG30" s="7">
        <v>0.424692873788899</v>
      </c>
      <c r="BH30" s="7">
        <v>4.00106520591362</v>
      </c>
      <c r="BI30" s="7">
        <v>5.81956748188668</v>
      </c>
      <c r="BJ30" s="7">
        <v>0.282311567898887</v>
      </c>
      <c r="BK30" s="7">
        <v>719.935486627899</v>
      </c>
      <c r="BL30" s="7">
        <v>424.951122190774</v>
      </c>
      <c r="BM30" s="7">
        <v>47.051998111368</v>
      </c>
      <c r="BN30" s="7">
        <v>60.8500807889668</v>
      </c>
      <c r="BO30" s="7">
        <v>20.5189761474062</v>
      </c>
      <c r="BP30" s="7">
        <v>18.9753203598239</v>
      </c>
      <c r="BQ30" s="7">
        <v>0.452359716472074</v>
      </c>
      <c r="BR30" s="7">
        <v>-2.03310233262346</v>
      </c>
      <c r="BS30" s="7">
        <v>-1.54921548732318</v>
      </c>
      <c r="BT30" s="7">
        <v>0.0290498609488168</v>
      </c>
      <c r="BU30" s="7">
        <v>-3.05512589528371</v>
      </c>
      <c r="BV30" s="7">
        <v>-2.50868854279179</v>
      </c>
      <c r="BW30" s="7">
        <v>790.453446105479</v>
      </c>
      <c r="BX30" s="7">
        <v>463.934130231843</v>
      </c>
      <c r="BY30" s="7">
        <v>51.063412145953</v>
      </c>
      <c r="BZ30" s="7">
        <v>69.0304159279794</v>
      </c>
      <c r="CA30" s="7">
        <v>25.3726695689238</v>
      </c>
      <c r="CB30" s="7">
        <v>18.1837430632991</v>
      </c>
      <c r="CC30" s="7">
        <v>-3.10732487967016</v>
      </c>
      <c r="CD30" s="7">
        <v>0.185144089221922</v>
      </c>
      <c r="CE30" s="7">
        <v>1.49000428520776</v>
      </c>
      <c r="CF30" s="7">
        <v>3.31184678887803</v>
      </c>
      <c r="CG30" s="7">
        <v>3.74339319375758</v>
      </c>
      <c r="CH30" s="7">
        <v>-3.10844824884634</v>
      </c>
      <c r="CI30" s="7">
        <v>671.8156318474</v>
      </c>
      <c r="CJ30" s="7">
        <v>443.739816838193</v>
      </c>
      <c r="CK30" s="7">
        <v>47.4449411012351</v>
      </c>
      <c r="CL30" s="7">
        <v>58.3924833356623</v>
      </c>
      <c r="CM30" s="7">
        <v>30.6127357596965</v>
      </c>
      <c r="CN30" s="7">
        <v>25.7790226612756</v>
      </c>
      <c r="CO30" s="7">
        <v>1.28891272358669</v>
      </c>
      <c r="CP30" s="7">
        <v>-2.49879557072381</v>
      </c>
      <c r="CQ30" s="7">
        <v>2.89310100051625</v>
      </c>
      <c r="CR30" s="7">
        <v>-0.884357197227473</v>
      </c>
      <c r="CS30" s="7">
        <v>1.76465825544983</v>
      </c>
      <c r="CT30" s="7">
        <v>2.37716920167759</v>
      </c>
    </row>
    <row r="31" spans="2:98" ht="15" customHeight="true">
      <c r="B31" s="6">
        <v>30</v>
      </c>
      <c r="C31" s="7">
        <v>1204.40493362498</v>
      </c>
      <c r="D31" s="7">
        <v>1111.59733058001</v>
      </c>
      <c r="E31" s="7">
        <v>1328.45397915052</v>
      </c>
      <c r="F31" s="7">
        <v>1271.37641656433</v>
      </c>
      <c r="G31" s="7">
        <v>1274.251006265</v>
      </c>
      <c r="H31" s="7">
        <v>1368.85516181295</v>
      </c>
      <c r="I31" s="7">
        <v>1327.24887146005</v>
      </c>
      <c r="J31" s="7">
        <v>1353.43977150414</v>
      </c>
      <c r="K31" s="7">
        <v>1342.60372101716</v>
      </c>
      <c r="L31" s="7">
        <v>0.744231663572464</v>
      </c>
      <c r="M31" s="7">
        <v>0.781236769457337</v>
      </c>
      <c r="N31" s="7">
        <v>-0.663378860394005</v>
      </c>
      <c r="O31" s="7">
        <v>1083.71472152185</v>
      </c>
      <c r="P31" s="7">
        <v>1258.61562839418</v>
      </c>
      <c r="Q31" s="7">
        <v>1223.44605328499</v>
      </c>
      <c r="R31" s="7">
        <v>1292.22066275187</v>
      </c>
      <c r="S31" s="7">
        <v>1280.36208307338</v>
      </c>
      <c r="T31" s="7">
        <v>1278.11135353731</v>
      </c>
      <c r="U31" s="7">
        <v>1296.11906687431</v>
      </c>
      <c r="V31" s="7">
        <v>1320.30839818726</v>
      </c>
      <c r="W31" s="7">
        <v>1319.38582524594</v>
      </c>
      <c r="X31" s="7">
        <v>-0.0249180451583015</v>
      </c>
      <c r="Y31" s="7">
        <v>-0.119633808846629</v>
      </c>
      <c r="Z31" s="7">
        <v>0.624179418704443</v>
      </c>
      <c r="AA31" s="7">
        <v>1313.70188663635</v>
      </c>
      <c r="AB31" s="7">
        <v>1383.23842783338</v>
      </c>
      <c r="AC31" s="7">
        <v>1431.60842670272</v>
      </c>
      <c r="AD31" s="7">
        <v>1442.97527168444</v>
      </c>
      <c r="AE31" s="7">
        <v>1488.16166621916</v>
      </c>
      <c r="AF31" s="7">
        <v>1465.81935458393</v>
      </c>
      <c r="AG31" s="7">
        <v>1535.50957073575</v>
      </c>
      <c r="AH31" s="7">
        <v>1499.24592154146</v>
      </c>
      <c r="AI31" s="7">
        <v>1376.54566208014</v>
      </c>
      <c r="AJ31" s="7">
        <v>0.376869682773304</v>
      </c>
      <c r="AK31" s="7">
        <v>2.46336149730632</v>
      </c>
      <c r="AL31" s="7">
        <v>1.50099262588083</v>
      </c>
      <c r="AM31" s="7">
        <v>1143.91413234912</v>
      </c>
      <c r="AN31" s="7">
        <v>1266.65256631751</v>
      </c>
      <c r="AO31" s="7">
        <v>1303.23945711008</v>
      </c>
      <c r="AP31" s="7">
        <v>1381.63253696747</v>
      </c>
      <c r="AQ31" s="7">
        <v>1338.81331957772</v>
      </c>
      <c r="AR31" s="7">
        <v>1358.95826670972</v>
      </c>
      <c r="AS31" s="7">
        <v>1426.99110456147</v>
      </c>
      <c r="AT31" s="7">
        <v>1414.18530166803</v>
      </c>
      <c r="AU31" s="7">
        <v>1336.37735558433</v>
      </c>
      <c r="AV31" s="7">
        <v>3.52059549174874</v>
      </c>
      <c r="AW31" s="7">
        <v>1.6795691480761</v>
      </c>
      <c r="AX31" s="7">
        <v>3.0801086373981</v>
      </c>
      <c r="AY31" s="7">
        <v>924.788297767069</v>
      </c>
      <c r="AZ31" s="7">
        <v>608.403564673784</v>
      </c>
      <c r="BA31" s="7">
        <v>120.000752449454</v>
      </c>
      <c r="BB31" s="7">
        <v>107.138807701234</v>
      </c>
      <c r="BC31" s="7">
        <v>58.7107895351137</v>
      </c>
      <c r="BD31" s="7">
        <v>49.3314158208927</v>
      </c>
      <c r="BE31" s="7">
        <v>-3.29237242460022</v>
      </c>
      <c r="BF31" s="7">
        <v>-1.47753659042655</v>
      </c>
      <c r="BG31" s="7">
        <v>-3.08567158491314</v>
      </c>
      <c r="BH31" s="7">
        <v>2.19095614875869</v>
      </c>
      <c r="BI31" s="7">
        <v>2.85363896054241</v>
      </c>
      <c r="BJ31" s="7">
        <v>1.26697794082065</v>
      </c>
      <c r="BK31" s="7">
        <v>833.6069647595</v>
      </c>
      <c r="BL31" s="7">
        <v>564.039902449671</v>
      </c>
      <c r="BM31" s="7">
        <v>91.7533212353155</v>
      </c>
      <c r="BN31" s="7">
        <v>107.936520634601</v>
      </c>
      <c r="BO31" s="7">
        <v>44.9138322214767</v>
      </c>
      <c r="BP31" s="7">
        <v>40.5554640678642</v>
      </c>
      <c r="BQ31" s="7">
        <v>-1.2552972864828</v>
      </c>
      <c r="BR31" s="7">
        <v>4.95624802245766</v>
      </c>
      <c r="BS31" s="7">
        <v>-0.829745725048269</v>
      </c>
      <c r="BT31" s="7">
        <v>-4.95051363623998</v>
      </c>
      <c r="BU31" s="7">
        <v>3.79572100698306</v>
      </c>
      <c r="BV31" s="7">
        <v>-0.277723078936106</v>
      </c>
      <c r="BW31" s="7">
        <v>911.740875777723</v>
      </c>
      <c r="BX31" s="7">
        <v>619.199769252681</v>
      </c>
      <c r="BY31" s="7">
        <v>95.7541418800047</v>
      </c>
      <c r="BZ31" s="7">
        <v>110.836968045888</v>
      </c>
      <c r="CA31" s="7">
        <v>46.9660178749978</v>
      </c>
      <c r="CB31" s="7">
        <v>47.5734349979971</v>
      </c>
      <c r="CC31" s="7">
        <v>2.37330305826981</v>
      </c>
      <c r="CD31" s="7">
        <v>-3.63388468162975</v>
      </c>
      <c r="CE31" s="7">
        <v>-0.185324498834689</v>
      </c>
      <c r="CF31" s="7">
        <v>5.8377236081019</v>
      </c>
      <c r="CG31" s="7">
        <v>1.74617070401109</v>
      </c>
      <c r="CH31" s="7">
        <v>-0.136179216335222</v>
      </c>
      <c r="CI31" s="7">
        <v>773.516455760398</v>
      </c>
      <c r="CJ31" s="7">
        <v>584.817427475373</v>
      </c>
      <c r="CK31" s="7">
        <v>77.585608796097</v>
      </c>
      <c r="CL31" s="7">
        <v>114.045298439829</v>
      </c>
      <c r="CM31" s="7">
        <v>51.3829121025888</v>
      </c>
      <c r="CN31" s="7">
        <v>46.0122922461205</v>
      </c>
      <c r="CO31" s="7">
        <v>-0.81303416732635</v>
      </c>
      <c r="CP31" s="7">
        <v>-1.62823742355204</v>
      </c>
      <c r="CQ31" s="7">
        <v>-4.83038666178436</v>
      </c>
      <c r="CR31" s="7">
        <v>3.79066854129815</v>
      </c>
      <c r="CS31" s="7">
        <v>2.95348141338218</v>
      </c>
      <c r="CT31" s="7">
        <v>-2.88494907708855</v>
      </c>
    </row>
    <row r="32" spans="2:98" ht="15" customHeight="true">
      <c r="B32" s="6">
        <v>31</v>
      </c>
      <c r="C32" s="7">
        <v>1207.22210255913</v>
      </c>
      <c r="D32" s="7">
        <v>1112.88083639551</v>
      </c>
      <c r="E32" s="7">
        <v>1335.32237349808</v>
      </c>
      <c r="F32" s="7">
        <v>1281.85894767337</v>
      </c>
      <c r="G32" s="7">
        <v>1286.15763177775</v>
      </c>
      <c r="H32" s="7">
        <v>1372.82087353418</v>
      </c>
      <c r="I32" s="7">
        <v>1338.85545622996</v>
      </c>
      <c r="J32" s="7">
        <v>1357.86810052578</v>
      </c>
      <c r="K32" s="7">
        <v>1348.13331928368</v>
      </c>
      <c r="L32" s="7">
        <v>-2.8680114484655</v>
      </c>
      <c r="M32" s="7">
        <v>-0.616541328599851</v>
      </c>
      <c r="N32" s="7">
        <v>1.31804996000756</v>
      </c>
      <c r="O32" s="7">
        <v>1086.24363583057</v>
      </c>
      <c r="P32" s="7">
        <v>1262.67147345371</v>
      </c>
      <c r="Q32" s="7">
        <v>1226.96000248794</v>
      </c>
      <c r="R32" s="7">
        <v>1304.1238592103</v>
      </c>
      <c r="S32" s="7">
        <v>1291.76087253972</v>
      </c>
      <c r="T32" s="7">
        <v>1289.0619098765</v>
      </c>
      <c r="U32" s="7">
        <v>1308.63266686662</v>
      </c>
      <c r="V32" s="7">
        <v>1323.68587324016</v>
      </c>
      <c r="W32" s="7">
        <v>1324.6478238613</v>
      </c>
      <c r="X32" s="7">
        <v>1.50056946998257</v>
      </c>
      <c r="Y32" s="7">
        <v>0.37743296645067</v>
      </c>
      <c r="Z32" s="7">
        <v>3.03824110283494</v>
      </c>
      <c r="AA32" s="7">
        <v>1318.89495004854</v>
      </c>
      <c r="AB32" s="7">
        <v>1386.75017838375</v>
      </c>
      <c r="AC32" s="7">
        <v>1438.33631974204</v>
      </c>
      <c r="AD32" s="7">
        <v>1453.03510937498</v>
      </c>
      <c r="AE32" s="7">
        <v>1498.89009104935</v>
      </c>
      <c r="AF32" s="7">
        <v>1474.70469856467</v>
      </c>
      <c r="AG32" s="7">
        <v>1549.85314231171</v>
      </c>
      <c r="AH32" s="7">
        <v>1504.56674019363</v>
      </c>
      <c r="AI32" s="7">
        <v>1379.36107571941</v>
      </c>
      <c r="AJ32" s="7">
        <v>-1.99701689051517</v>
      </c>
      <c r="AK32" s="7">
        <v>-1.19937326332092</v>
      </c>
      <c r="AL32" s="7">
        <v>-5.79820320046247</v>
      </c>
      <c r="AM32" s="7">
        <v>1148.45273631869</v>
      </c>
      <c r="AN32" s="7">
        <v>1270.3754431651</v>
      </c>
      <c r="AO32" s="7">
        <v>1310.00511647607</v>
      </c>
      <c r="AP32" s="7">
        <v>1387.24115074042</v>
      </c>
      <c r="AQ32" s="7">
        <v>1349.9905084542</v>
      </c>
      <c r="AR32" s="7">
        <v>1369.55880982548</v>
      </c>
      <c r="AS32" s="7">
        <v>1437.312512356</v>
      </c>
      <c r="AT32" s="7">
        <v>1418.78565921643</v>
      </c>
      <c r="AU32" s="7">
        <v>1343.18397785916</v>
      </c>
      <c r="AV32" s="7">
        <v>1.99305316709524</v>
      </c>
      <c r="AW32" s="7">
        <v>-0.726774397843201</v>
      </c>
      <c r="AX32" s="7">
        <v>0.296982365746771</v>
      </c>
      <c r="AY32" s="7">
        <v>1028.00709876554</v>
      </c>
      <c r="AZ32" s="7">
        <v>758.969775634904</v>
      </c>
      <c r="BA32" s="7">
        <v>198.476034673662</v>
      </c>
      <c r="BB32" s="7">
        <v>178.431291174118</v>
      </c>
      <c r="BC32" s="7">
        <v>110.15337608167</v>
      </c>
      <c r="BD32" s="7">
        <v>84.7966015135257</v>
      </c>
      <c r="BE32" s="7">
        <v>-1.16491325708785</v>
      </c>
      <c r="BF32" s="7">
        <v>-5.92512927571761</v>
      </c>
      <c r="BG32" s="7">
        <v>0.603860650121078</v>
      </c>
      <c r="BH32" s="7">
        <v>-0.682176398646789</v>
      </c>
      <c r="BI32" s="7">
        <v>-2.8938248333875</v>
      </c>
      <c r="BJ32" s="7">
        <v>-1.57983760634215</v>
      </c>
      <c r="BK32" s="7">
        <v>927.419974317006</v>
      </c>
      <c r="BL32" s="7">
        <v>699.080041524119</v>
      </c>
      <c r="BM32" s="7">
        <v>157.03369095757</v>
      </c>
      <c r="BN32" s="7">
        <v>179.471998816464</v>
      </c>
      <c r="BO32" s="7">
        <v>80.3904306490154</v>
      </c>
      <c r="BP32" s="7">
        <v>74.819502405931</v>
      </c>
      <c r="BQ32" s="7">
        <v>0.760757306573396</v>
      </c>
      <c r="BR32" s="7">
        <v>-1.55293446394353</v>
      </c>
      <c r="BS32" s="7">
        <v>-3.75852685961081</v>
      </c>
      <c r="BT32" s="7">
        <v>2.41173235743008</v>
      </c>
      <c r="BU32" s="7">
        <v>-1.72533507855906</v>
      </c>
      <c r="BV32" s="7">
        <v>-0.698085627752334</v>
      </c>
      <c r="BW32" s="7">
        <v>1011.92300458296</v>
      </c>
      <c r="BX32" s="7">
        <v>766.529917538641</v>
      </c>
      <c r="BY32" s="7">
        <v>164.041586723915</v>
      </c>
      <c r="BZ32" s="7">
        <v>193.907866985901</v>
      </c>
      <c r="CA32" s="7">
        <v>87.3800753013688</v>
      </c>
      <c r="CB32" s="7">
        <v>78.6284291002094</v>
      </c>
      <c r="CC32" s="7">
        <v>-2.58873464138605</v>
      </c>
      <c r="CD32" s="7">
        <v>-0.739525888456683</v>
      </c>
      <c r="CE32" s="7">
        <v>-1.27215245841307</v>
      </c>
      <c r="CF32" s="7">
        <v>-1.58083216579962</v>
      </c>
      <c r="CG32" s="7">
        <v>-3.19126616331187</v>
      </c>
      <c r="CH32" s="7">
        <v>-0.390086920687281</v>
      </c>
      <c r="CI32" s="7">
        <v>856.674278016185</v>
      </c>
      <c r="CJ32" s="7">
        <v>715.248629986566</v>
      </c>
      <c r="CK32" s="7">
        <v>139.993176344567</v>
      </c>
      <c r="CL32" s="7">
        <v>195.16763167901</v>
      </c>
      <c r="CM32" s="7">
        <v>95.4337320503491</v>
      </c>
      <c r="CN32" s="7">
        <v>79.3867855067033</v>
      </c>
      <c r="CO32" s="7">
        <v>3.2603023240049</v>
      </c>
      <c r="CP32" s="7">
        <v>2.63845388947902</v>
      </c>
      <c r="CQ32" s="7">
        <v>-2.42758999136231</v>
      </c>
      <c r="CR32" s="7">
        <v>0.77642787392142</v>
      </c>
      <c r="CS32" s="7">
        <v>-0.750543907461179</v>
      </c>
      <c r="CT32" s="7">
        <v>1.36205150966862</v>
      </c>
    </row>
    <row r="33" spans="2:98" ht="15" customHeight="true">
      <c r="B33" s="6">
        <v>32</v>
      </c>
      <c r="C33" s="7">
        <v>1209.41932462288</v>
      </c>
      <c r="D33" s="7">
        <v>1113.55760593873</v>
      </c>
      <c r="E33" s="7">
        <v>1339.0257539354</v>
      </c>
      <c r="F33" s="7">
        <v>1286.32607760253</v>
      </c>
      <c r="G33" s="7">
        <v>1292.11025815475</v>
      </c>
      <c r="H33" s="7">
        <v>1377.43435933403</v>
      </c>
      <c r="I33" s="7">
        <v>1342.05941297519</v>
      </c>
      <c r="J33" s="7">
        <v>1356.73988316272</v>
      </c>
      <c r="K33" s="7">
        <v>1349.75923893839</v>
      </c>
      <c r="L33" s="7">
        <v>-1.76942032721718</v>
      </c>
      <c r="M33" s="7">
        <v>-3.31085005535169</v>
      </c>
      <c r="N33" s="7">
        <v>-1.23788406396625</v>
      </c>
      <c r="O33" s="7">
        <v>1087.89443663781</v>
      </c>
      <c r="P33" s="7">
        <v>1263.94318933701</v>
      </c>
      <c r="Q33" s="7">
        <v>1228.0655052822</v>
      </c>
      <c r="R33" s="7">
        <v>1310.30403123108</v>
      </c>
      <c r="S33" s="7">
        <v>1298.70934019845</v>
      </c>
      <c r="T33" s="7">
        <v>1294.01028427599</v>
      </c>
      <c r="U33" s="7">
        <v>1315.54152418863</v>
      </c>
      <c r="V33" s="7">
        <v>1325.14012422354</v>
      </c>
      <c r="W33" s="7">
        <v>1326.4086087429</v>
      </c>
      <c r="X33" s="7">
        <v>-0.354764006591722</v>
      </c>
      <c r="Y33" s="7">
        <v>-5.37916527750076</v>
      </c>
      <c r="Z33" s="7">
        <v>0.625551644442567</v>
      </c>
      <c r="AA33" s="7">
        <v>1320.34156187719</v>
      </c>
      <c r="AB33" s="7">
        <v>1387.4645137604</v>
      </c>
      <c r="AC33" s="7">
        <v>1440.59204070294</v>
      </c>
      <c r="AD33" s="7">
        <v>1459.26536744372</v>
      </c>
      <c r="AE33" s="7">
        <v>1503.3236704544</v>
      </c>
      <c r="AF33" s="7">
        <v>1477.79291279746</v>
      </c>
      <c r="AG33" s="7">
        <v>1556.71232328023</v>
      </c>
      <c r="AH33" s="7">
        <v>1506.81862829698</v>
      </c>
      <c r="AI33" s="7">
        <v>1379.95587187837</v>
      </c>
      <c r="AJ33" s="7">
        <v>1.50714864460952</v>
      </c>
      <c r="AK33" s="7">
        <v>-4.71513662259986</v>
      </c>
      <c r="AL33" s="7">
        <v>0.518655549204141</v>
      </c>
      <c r="AM33" s="7">
        <v>1151.82475230053</v>
      </c>
      <c r="AN33" s="7">
        <v>1272.66015001895</v>
      </c>
      <c r="AO33" s="7">
        <v>1312.25929901804</v>
      </c>
      <c r="AP33" s="7">
        <v>1391.46450965889</v>
      </c>
      <c r="AQ33" s="7">
        <v>1356.94932820107</v>
      </c>
      <c r="AR33" s="7">
        <v>1373.26496011522</v>
      </c>
      <c r="AS33" s="7">
        <v>1442.46217251282</v>
      </c>
      <c r="AT33" s="7">
        <v>1418.86166658292</v>
      </c>
      <c r="AU33" s="7">
        <v>1345.05515945677</v>
      </c>
      <c r="AV33" s="7">
        <v>-1.26568728242228</v>
      </c>
      <c r="AW33" s="7">
        <v>2.74370791556294</v>
      </c>
      <c r="AX33" s="7">
        <v>-0.75306549813331</v>
      </c>
      <c r="AY33" s="7">
        <v>1108.66163646724</v>
      </c>
      <c r="AZ33" s="7">
        <v>886.831736269556</v>
      </c>
      <c r="BA33" s="7">
        <v>328.31899393716</v>
      </c>
      <c r="BB33" s="7">
        <v>295.2418390839</v>
      </c>
      <c r="BC33" s="7">
        <v>186.572541904819</v>
      </c>
      <c r="BD33" s="7">
        <v>148.88467302637</v>
      </c>
      <c r="BE33" s="7">
        <v>-1.17337737133812</v>
      </c>
      <c r="BF33" s="7">
        <v>3.37602454288435</v>
      </c>
      <c r="BG33" s="7">
        <v>-0.388501476608326</v>
      </c>
      <c r="BH33" s="7">
        <v>-1.69181044370634</v>
      </c>
      <c r="BI33" s="7">
        <v>-1.50545562342313</v>
      </c>
      <c r="BJ33" s="7">
        <v>-3.63741112776097</v>
      </c>
      <c r="BK33" s="7">
        <v>1001.51468989262</v>
      </c>
      <c r="BL33" s="7">
        <v>812.950016571379</v>
      </c>
      <c r="BM33" s="7">
        <v>255.63250935757</v>
      </c>
      <c r="BN33" s="7">
        <v>291.028808782529</v>
      </c>
      <c r="BO33" s="7">
        <v>145.459764036208</v>
      </c>
      <c r="BP33" s="7">
        <v>126.307032377129</v>
      </c>
      <c r="BQ33" s="7">
        <v>-3.95068403713867</v>
      </c>
      <c r="BR33" s="7">
        <v>-5.83033893715401</v>
      </c>
      <c r="BS33" s="7">
        <v>2.91618585534798</v>
      </c>
      <c r="BT33" s="7">
        <v>-1.66270107226865</v>
      </c>
      <c r="BU33" s="7">
        <v>-2.52146492985594</v>
      </c>
      <c r="BV33" s="7">
        <v>0.444243507253304</v>
      </c>
      <c r="BW33" s="7">
        <v>1089.63286427573</v>
      </c>
      <c r="BX33" s="7">
        <v>892.694302248628</v>
      </c>
      <c r="BY33" s="7">
        <v>273.672896156049</v>
      </c>
      <c r="BZ33" s="7">
        <v>319.084398462663</v>
      </c>
      <c r="CA33" s="7">
        <v>152.233075563412</v>
      </c>
      <c r="CB33" s="7">
        <v>134.002960726489</v>
      </c>
      <c r="CC33" s="7">
        <v>-3.20816493866005</v>
      </c>
      <c r="CD33" s="7">
        <v>-3.9024024842488</v>
      </c>
      <c r="CE33" s="7">
        <v>-2.9085399416781</v>
      </c>
      <c r="CF33" s="7">
        <v>3.81691660529259</v>
      </c>
      <c r="CG33" s="7">
        <v>-4.29747657222879</v>
      </c>
      <c r="CH33" s="7">
        <v>-2.59863139712934</v>
      </c>
      <c r="CI33" s="7">
        <v>922.890424316454</v>
      </c>
      <c r="CJ33" s="7">
        <v>823.744812352868</v>
      </c>
      <c r="CK33" s="7">
        <v>225.48675599418</v>
      </c>
      <c r="CL33" s="7">
        <v>311.11758927334</v>
      </c>
      <c r="CM33" s="7">
        <v>161.784181138771</v>
      </c>
      <c r="CN33" s="7">
        <v>138.72060230866</v>
      </c>
      <c r="CO33" s="7">
        <v>0.173401325244868</v>
      </c>
      <c r="CP33" s="7">
        <v>1.71165627836945</v>
      </c>
      <c r="CQ33" s="7">
        <v>-1.27065575969937</v>
      </c>
      <c r="CR33" s="7">
        <v>0.309579675914392</v>
      </c>
      <c r="CS33" s="7">
        <v>4.42580199960867</v>
      </c>
      <c r="CT33" s="7">
        <v>-0.620042964462755</v>
      </c>
    </row>
    <row r="34" spans="2:98" ht="15" customHeight="true">
      <c r="B34" s="6">
        <v>33</v>
      </c>
      <c r="C34" s="7">
        <v>1210.98329345596</v>
      </c>
      <c r="D34" s="7">
        <v>1114.80802831776</v>
      </c>
      <c r="E34" s="7">
        <v>1341.20408991695</v>
      </c>
      <c r="F34" s="7">
        <v>1289.92803473146</v>
      </c>
      <c r="G34" s="7">
        <v>1296.19651923558</v>
      </c>
      <c r="H34" s="7">
        <v>1377.21747607821</v>
      </c>
      <c r="I34" s="7">
        <v>1347.66897006825</v>
      </c>
      <c r="J34" s="7">
        <v>1357.34367939877</v>
      </c>
      <c r="K34" s="7">
        <v>1354.51221827565</v>
      </c>
      <c r="L34" s="7">
        <v>0.707415173547361</v>
      </c>
      <c r="M34" s="7">
        <v>-2.0300988236163</v>
      </c>
      <c r="N34" s="7">
        <v>-0.815876373662377</v>
      </c>
      <c r="O34" s="7">
        <v>1091.39110432131</v>
      </c>
      <c r="P34" s="7">
        <v>1264.51182982008</v>
      </c>
      <c r="Q34" s="7">
        <v>1230.49234825465</v>
      </c>
      <c r="R34" s="7">
        <v>1315.84666688318</v>
      </c>
      <c r="S34" s="7">
        <v>1304.46065444834</v>
      </c>
      <c r="T34" s="7">
        <v>1296.99632715965</v>
      </c>
      <c r="U34" s="7">
        <v>1319.24616855988</v>
      </c>
      <c r="V34" s="7">
        <v>1326.73111224985</v>
      </c>
      <c r="W34" s="7">
        <v>1328.35350895093</v>
      </c>
      <c r="X34" s="7">
        <v>-3.70619250886693</v>
      </c>
      <c r="Y34" s="7">
        <v>3.20069221855601</v>
      </c>
      <c r="Z34" s="7">
        <v>-4.44830453840314</v>
      </c>
      <c r="AA34" s="7">
        <v>1321.89822901551</v>
      </c>
      <c r="AB34" s="7">
        <v>1389.55230566924</v>
      </c>
      <c r="AC34" s="7">
        <v>1442.017840234</v>
      </c>
      <c r="AD34" s="7">
        <v>1466.53249317428</v>
      </c>
      <c r="AE34" s="7">
        <v>1507.80592192044</v>
      </c>
      <c r="AF34" s="7">
        <v>1482.58762237323</v>
      </c>
      <c r="AG34" s="7">
        <v>1562.55345491853</v>
      </c>
      <c r="AH34" s="7">
        <v>1508.58627252575</v>
      </c>
      <c r="AI34" s="7">
        <v>1381.81516017701</v>
      </c>
      <c r="AJ34" s="7">
        <v>1.28854752786128</v>
      </c>
      <c r="AK34" s="7">
        <v>-1.17342351355819</v>
      </c>
      <c r="AL34" s="7">
        <v>1.19735968516079</v>
      </c>
      <c r="AM34" s="7">
        <v>1152.53485628383</v>
      </c>
      <c r="AN34" s="7">
        <v>1276.533026153</v>
      </c>
      <c r="AO34" s="7">
        <v>1314.14245393041</v>
      </c>
      <c r="AP34" s="7">
        <v>1396.09972621714</v>
      </c>
      <c r="AQ34" s="7">
        <v>1360.89628983598</v>
      </c>
      <c r="AR34" s="7">
        <v>1380.12016623863</v>
      </c>
      <c r="AS34" s="7">
        <v>1448.59660469981</v>
      </c>
      <c r="AT34" s="7">
        <v>1419.62934616905</v>
      </c>
      <c r="AU34" s="7">
        <v>1345.5803374825</v>
      </c>
      <c r="AV34" s="7">
        <v>0.0826948904600613</v>
      </c>
      <c r="AW34" s="7">
        <v>-3.24065494744173</v>
      </c>
      <c r="AX34" s="7">
        <v>-2.82582035445194</v>
      </c>
      <c r="AY34" s="7">
        <v>1180.53259481681</v>
      </c>
      <c r="AZ34" s="7">
        <v>995.189368228259</v>
      </c>
      <c r="BA34" s="7">
        <v>493.368372075364</v>
      </c>
      <c r="BB34" s="7">
        <v>461.031869172082</v>
      </c>
      <c r="BC34" s="7">
        <v>305.766519794339</v>
      </c>
      <c r="BD34" s="7">
        <v>255.761646752645</v>
      </c>
      <c r="BE34" s="7">
        <v>3.50099396925452</v>
      </c>
      <c r="BF34" s="7">
        <v>1.93590490358929</v>
      </c>
      <c r="BG34" s="7">
        <v>2.17538663024243</v>
      </c>
      <c r="BH34" s="7">
        <v>-1.46805659483607</v>
      </c>
      <c r="BI34" s="7">
        <v>-0.574197198931415</v>
      </c>
      <c r="BJ34" s="7">
        <v>-0.0676093011588819</v>
      </c>
      <c r="BK34" s="7">
        <v>1062.84306144203</v>
      </c>
      <c r="BL34" s="7">
        <v>908.221265180614</v>
      </c>
      <c r="BM34" s="7">
        <v>393.398875213577</v>
      </c>
      <c r="BN34" s="7">
        <v>441.880860713081</v>
      </c>
      <c r="BO34" s="7">
        <v>230.574189441317</v>
      </c>
      <c r="BP34" s="7">
        <v>224.21588086743</v>
      </c>
      <c r="BQ34" s="7">
        <v>-3.34819621139877</v>
      </c>
      <c r="BR34" s="7">
        <v>-0.308093642933727</v>
      </c>
      <c r="BS34" s="7">
        <v>0.424266142985289</v>
      </c>
      <c r="BT34" s="7">
        <v>4.69137340332827</v>
      </c>
      <c r="BU34" s="7">
        <v>-2.54295873823685</v>
      </c>
      <c r="BV34" s="7">
        <v>2.71532143952345</v>
      </c>
      <c r="BW34" s="7">
        <v>1153.09827992235</v>
      </c>
      <c r="BX34" s="7">
        <v>997.736703595258</v>
      </c>
      <c r="BY34" s="7">
        <v>424.23155367764</v>
      </c>
      <c r="BZ34" s="7">
        <v>480.106697679013</v>
      </c>
      <c r="CA34" s="7">
        <v>254.12878494907</v>
      </c>
      <c r="CB34" s="7">
        <v>228.993283409734</v>
      </c>
      <c r="CC34" s="7">
        <v>-3.3921992622104</v>
      </c>
      <c r="CD34" s="7">
        <v>-1.12270375610524</v>
      </c>
      <c r="CE34" s="7">
        <v>1.41298649690543</v>
      </c>
      <c r="CF34" s="7">
        <v>-0.437551391762099</v>
      </c>
      <c r="CG34" s="7">
        <v>0.881287849100318</v>
      </c>
      <c r="CH34" s="7">
        <v>-0.188142108009288</v>
      </c>
      <c r="CI34" s="7">
        <v>979.04634763867</v>
      </c>
      <c r="CJ34" s="7">
        <v>914.901275225908</v>
      </c>
      <c r="CK34" s="7">
        <v>351.841025237502</v>
      </c>
      <c r="CL34" s="7">
        <v>454.010814860517</v>
      </c>
      <c r="CM34" s="7">
        <v>262.134847179311</v>
      </c>
      <c r="CN34" s="7">
        <v>220.787865410324</v>
      </c>
      <c r="CO34" s="7">
        <v>-2.37370894281594</v>
      </c>
      <c r="CP34" s="7">
        <v>-1.86239694811002</v>
      </c>
      <c r="CQ34" s="7">
        <v>-1.04221313504058</v>
      </c>
      <c r="CR34" s="7">
        <v>1.99438865155162</v>
      </c>
      <c r="CS34" s="7">
        <v>-2.7257847270489</v>
      </c>
      <c r="CT34" s="7">
        <v>-0.555123540627392</v>
      </c>
    </row>
    <row r="35" spans="2:98" ht="15" customHeight="true">
      <c r="B35" s="6">
        <v>34</v>
      </c>
      <c r="C35" s="7">
        <v>1211.80422696155</v>
      </c>
      <c r="D35" s="7">
        <v>1116.35983579521</v>
      </c>
      <c r="E35" s="7">
        <v>1342.50780316531</v>
      </c>
      <c r="F35" s="7">
        <v>1289.51618248347</v>
      </c>
      <c r="G35" s="7">
        <v>1295.92377857534</v>
      </c>
      <c r="H35" s="7">
        <v>1378.66676736014</v>
      </c>
      <c r="I35" s="7">
        <v>1349.66718646516</v>
      </c>
      <c r="J35" s="7">
        <v>1356.84123621939</v>
      </c>
      <c r="K35" s="7">
        <v>1355.40893644424</v>
      </c>
      <c r="L35" s="7">
        <v>4.36392346140929</v>
      </c>
      <c r="M35" s="7">
        <v>3.82769553787193</v>
      </c>
      <c r="N35" s="7">
        <v>-1.94122841628905</v>
      </c>
      <c r="O35" s="7">
        <v>1092.84622713898</v>
      </c>
      <c r="P35" s="7">
        <v>1266.92098692783</v>
      </c>
      <c r="Q35" s="7">
        <v>1231.21391464973</v>
      </c>
      <c r="R35" s="7">
        <v>1317.60281083065</v>
      </c>
      <c r="S35" s="7">
        <v>1308.24481643533</v>
      </c>
      <c r="T35" s="7">
        <v>1297.33253983596</v>
      </c>
      <c r="U35" s="7">
        <v>1322.40426546955</v>
      </c>
      <c r="V35" s="7">
        <v>1326.62104248098</v>
      </c>
      <c r="W35" s="7">
        <v>1329.06098893574</v>
      </c>
      <c r="X35" s="7">
        <v>-4.74912700532195</v>
      </c>
      <c r="Y35" s="7">
        <v>-0.47039228668973</v>
      </c>
      <c r="Z35" s="7">
        <v>-1.41684427953805</v>
      </c>
      <c r="AA35" s="7">
        <v>1325.5494183829</v>
      </c>
      <c r="AB35" s="7">
        <v>1392.12523382511</v>
      </c>
      <c r="AC35" s="7">
        <v>1440.35661838939</v>
      </c>
      <c r="AD35" s="7">
        <v>1468.82389432278</v>
      </c>
      <c r="AE35" s="7">
        <v>1510.76697303059</v>
      </c>
      <c r="AF35" s="7">
        <v>1487.14601227386</v>
      </c>
      <c r="AG35" s="7">
        <v>1563.98739627383</v>
      </c>
      <c r="AH35" s="7">
        <v>1506.75514973089</v>
      </c>
      <c r="AI35" s="7">
        <v>1381.26499416384</v>
      </c>
      <c r="AJ35" s="7">
        <v>-4.65186101645531</v>
      </c>
      <c r="AK35" s="7">
        <v>1.27920119881492</v>
      </c>
      <c r="AL35" s="7">
        <v>-2.92626184571827</v>
      </c>
      <c r="AM35" s="7">
        <v>1155.36990648527</v>
      </c>
      <c r="AN35" s="7">
        <v>1278.91049983496</v>
      </c>
      <c r="AO35" s="7">
        <v>1315.34804122542</v>
      </c>
      <c r="AP35" s="7">
        <v>1400.81801637529</v>
      </c>
      <c r="AQ35" s="7">
        <v>1362.75351703215</v>
      </c>
      <c r="AR35" s="7">
        <v>1381.68017240386</v>
      </c>
      <c r="AS35" s="7">
        <v>1448.90689219424</v>
      </c>
      <c r="AT35" s="7">
        <v>1419.1289398434</v>
      </c>
      <c r="AU35" s="7">
        <v>1345.06904596407</v>
      </c>
      <c r="AV35" s="7">
        <v>-2.71654745183832</v>
      </c>
      <c r="AW35" s="7">
        <v>-1.51471302385608</v>
      </c>
      <c r="AX35" s="7">
        <v>1.16135222981893</v>
      </c>
      <c r="AY35" s="7">
        <v>1234.16270046589</v>
      </c>
      <c r="AZ35" s="7">
        <v>1082.27162363052</v>
      </c>
      <c r="BA35" s="7">
        <v>653.292922613896</v>
      </c>
      <c r="BB35" s="7">
        <v>626.738270609504</v>
      </c>
      <c r="BC35" s="7">
        <v>469.735672720297</v>
      </c>
      <c r="BD35" s="7">
        <v>405.310042849029</v>
      </c>
      <c r="BE35" s="7">
        <v>9.40810717527574</v>
      </c>
      <c r="BF35" s="7">
        <v>3.26201317420055</v>
      </c>
      <c r="BG35" s="7">
        <v>-2.76580463822165</v>
      </c>
      <c r="BH35" s="7">
        <v>-0.274621909981306</v>
      </c>
      <c r="BI35" s="7">
        <v>-1.48040684104217</v>
      </c>
      <c r="BJ35" s="7">
        <v>2.58298826972532</v>
      </c>
      <c r="BK35" s="7">
        <v>1110.04417498926</v>
      </c>
      <c r="BL35" s="7">
        <v>982.212429524604</v>
      </c>
      <c r="BM35" s="7">
        <v>529.368063052201</v>
      </c>
      <c r="BN35" s="7">
        <v>588.158617991552</v>
      </c>
      <c r="BO35" s="7">
        <v>361.507921389175</v>
      </c>
      <c r="BP35" s="7">
        <v>350.757721563473</v>
      </c>
      <c r="BQ35" s="7">
        <v>2.02672732500469</v>
      </c>
      <c r="BR35" s="7">
        <v>4.09705547621343</v>
      </c>
      <c r="BS35" s="7">
        <v>9.48653437640087</v>
      </c>
      <c r="BT35" s="7">
        <v>-0.799773348516282</v>
      </c>
      <c r="BU35" s="7">
        <v>3.20538000818306</v>
      </c>
      <c r="BV35" s="7">
        <v>0.0146924746991317</v>
      </c>
      <c r="BW35" s="7">
        <v>1202.06974633419</v>
      </c>
      <c r="BX35" s="7">
        <v>1079.36572138815</v>
      </c>
      <c r="BY35" s="7">
        <v>578.483751474509</v>
      </c>
      <c r="BZ35" s="7">
        <v>640.914105754379</v>
      </c>
      <c r="CA35" s="7">
        <v>399.960199662024</v>
      </c>
      <c r="CB35" s="7">
        <v>362.540303799305</v>
      </c>
      <c r="CC35" s="7">
        <v>-4.75807395829224</v>
      </c>
      <c r="CD35" s="7">
        <v>-3.49922351157011</v>
      </c>
      <c r="CE35" s="7">
        <v>4.06591489687571</v>
      </c>
      <c r="CF35" s="7">
        <v>-5.21792067375554</v>
      </c>
      <c r="CG35" s="7">
        <v>-0.158967296542414</v>
      </c>
      <c r="CH35" s="7">
        <v>-0.0480778016762997</v>
      </c>
      <c r="CI35" s="7">
        <v>1021.91093778463</v>
      </c>
      <c r="CJ35" s="7">
        <v>985.861906478876</v>
      </c>
      <c r="CK35" s="7">
        <v>479.545922483738</v>
      </c>
      <c r="CL35" s="7">
        <v>592.120435415344</v>
      </c>
      <c r="CM35" s="7">
        <v>403.28674517646</v>
      </c>
      <c r="CN35" s="7">
        <v>305.415886192261</v>
      </c>
      <c r="CO35" s="7">
        <v>-0.777264236323845</v>
      </c>
      <c r="CP35" s="7">
        <v>4.07020692388642</v>
      </c>
      <c r="CQ35" s="7">
        <v>1.84612273714492</v>
      </c>
      <c r="CR35" s="7">
        <v>-1.38546638826665</v>
      </c>
      <c r="CS35" s="7">
        <v>1.72991855802002</v>
      </c>
      <c r="CT35" s="7">
        <v>-2.9451228906637</v>
      </c>
    </row>
    <row r="36" spans="2:98" ht="15" customHeight="true">
      <c r="B36" s="6">
        <v>35</v>
      </c>
      <c r="C36" s="7">
        <v>1216.24443250528</v>
      </c>
      <c r="D36" s="7">
        <v>1119.2444610751</v>
      </c>
      <c r="E36" s="7">
        <v>1343.47446468215</v>
      </c>
      <c r="F36" s="7">
        <v>1291.48648433959</v>
      </c>
      <c r="G36" s="7">
        <v>1300.16244690904</v>
      </c>
      <c r="H36" s="7">
        <v>1380.91079357883</v>
      </c>
      <c r="I36" s="7">
        <v>1350.60633672131</v>
      </c>
      <c r="J36" s="7">
        <v>1358.34938438544</v>
      </c>
      <c r="K36" s="7">
        <v>1355.79775919913</v>
      </c>
      <c r="L36" s="7">
        <v>-4.07357162387007</v>
      </c>
      <c r="M36" s="7">
        <v>-0.62503008171825</v>
      </c>
      <c r="N36" s="7">
        <v>2.17897324593241</v>
      </c>
      <c r="O36" s="7">
        <v>1098.67722939922</v>
      </c>
      <c r="P36" s="7">
        <v>1269.91955995647</v>
      </c>
      <c r="Q36" s="7">
        <v>1232.26700977153</v>
      </c>
      <c r="R36" s="7">
        <v>1320.11915111234</v>
      </c>
      <c r="S36" s="7">
        <v>1312.48714983692</v>
      </c>
      <c r="T36" s="7">
        <v>1299.38632328618</v>
      </c>
      <c r="U36" s="7">
        <v>1323.89574331231</v>
      </c>
      <c r="V36" s="7">
        <v>1326.69395377566</v>
      </c>
      <c r="W36" s="7">
        <v>1330.91312217521</v>
      </c>
      <c r="X36" s="7">
        <v>-0.598347584389558</v>
      </c>
      <c r="Y36" s="7">
        <v>-2.33243857506841</v>
      </c>
      <c r="Z36" s="7">
        <v>-0.91750208986241</v>
      </c>
      <c r="AA36" s="7">
        <v>1328.69700802638</v>
      </c>
      <c r="AB36" s="7">
        <v>1394.68438417336</v>
      </c>
      <c r="AC36" s="7">
        <v>1443.09747538944</v>
      </c>
      <c r="AD36" s="7">
        <v>1472.79388898239</v>
      </c>
      <c r="AE36" s="7">
        <v>1513.7398711004</v>
      </c>
      <c r="AF36" s="7">
        <v>1490.7463776463</v>
      </c>
      <c r="AG36" s="7">
        <v>1566.85872655001</v>
      </c>
      <c r="AH36" s="7">
        <v>1508.36873509912</v>
      </c>
      <c r="AI36" s="7">
        <v>1383.03579902236</v>
      </c>
      <c r="AJ36" s="7">
        <v>-0.150568145697434</v>
      </c>
      <c r="AK36" s="7">
        <v>-4.20428577663597</v>
      </c>
      <c r="AL36" s="7">
        <v>-6.99804358913661</v>
      </c>
      <c r="AM36" s="7">
        <v>1158.15610853089</v>
      </c>
      <c r="AN36" s="7">
        <v>1281.3530787176</v>
      </c>
      <c r="AO36" s="7">
        <v>1316.24222032922</v>
      </c>
      <c r="AP36" s="7">
        <v>1402.7940921131</v>
      </c>
      <c r="AQ36" s="7">
        <v>1363.00058514183</v>
      </c>
      <c r="AR36" s="7">
        <v>1385.06741470533</v>
      </c>
      <c r="AS36" s="7">
        <v>1450.53258257375</v>
      </c>
      <c r="AT36" s="7">
        <v>1421.97695612652</v>
      </c>
      <c r="AU36" s="7">
        <v>1347.3991597646</v>
      </c>
      <c r="AV36" s="7">
        <v>-2.30172297159561</v>
      </c>
      <c r="AW36" s="7">
        <v>1.78637962481616</v>
      </c>
      <c r="AX36" s="7">
        <v>0.582729449038197</v>
      </c>
      <c r="AY36" s="7">
        <v>1278.19904013074</v>
      </c>
      <c r="AZ36" s="7">
        <v>1157.2110834974</v>
      </c>
      <c r="BA36" s="7">
        <v>806.688996096358</v>
      </c>
      <c r="BB36" s="7">
        <v>789.991421562164</v>
      </c>
      <c r="BC36" s="7">
        <v>634.461572966176</v>
      </c>
      <c r="BD36" s="7">
        <v>569.514658292514</v>
      </c>
      <c r="BE36" s="7">
        <v>15.0000442087098</v>
      </c>
      <c r="BF36" s="7">
        <v>13.388229590309</v>
      </c>
      <c r="BG36" s="7">
        <v>0.912281430909388</v>
      </c>
      <c r="BH36" s="7">
        <v>-3.31671690199164</v>
      </c>
      <c r="BI36" s="7">
        <v>3.29239572623464</v>
      </c>
      <c r="BJ36" s="7">
        <v>0.891942795985415</v>
      </c>
      <c r="BK36" s="7">
        <v>1148.31191857982</v>
      </c>
      <c r="BL36" s="7">
        <v>1044.20976090821</v>
      </c>
      <c r="BM36" s="7">
        <v>664.256743737955</v>
      </c>
      <c r="BN36" s="7">
        <v>732.992668346124</v>
      </c>
      <c r="BO36" s="7">
        <v>500.670631429758</v>
      </c>
      <c r="BP36" s="7">
        <v>501.137265089908</v>
      </c>
      <c r="BQ36" s="7">
        <v>0.778570409961048</v>
      </c>
      <c r="BR36" s="7">
        <v>-2.73851100859747</v>
      </c>
      <c r="BS36" s="7">
        <v>22.7327358785046</v>
      </c>
      <c r="BT36" s="7">
        <v>3.1407572867306</v>
      </c>
      <c r="BU36" s="7">
        <v>2.04126033465673</v>
      </c>
      <c r="BV36" s="7">
        <v>2.75699781392632</v>
      </c>
      <c r="BW36" s="7">
        <v>1243.37111980636</v>
      </c>
      <c r="BX36" s="7">
        <v>1147.64112653768</v>
      </c>
      <c r="BY36" s="7">
        <v>731.672722570207</v>
      </c>
      <c r="BZ36" s="7">
        <v>797.53207673061</v>
      </c>
      <c r="CA36" s="7">
        <v>558.475569132176</v>
      </c>
      <c r="CB36" s="7">
        <v>506.830004651647</v>
      </c>
      <c r="CC36" s="7">
        <v>0.866147757119961</v>
      </c>
      <c r="CD36" s="7">
        <v>-5.1020405236718</v>
      </c>
      <c r="CE36" s="7">
        <v>17.4874030901328</v>
      </c>
      <c r="CF36" s="7">
        <v>-1.1967215345494</v>
      </c>
      <c r="CG36" s="7">
        <v>1.33289562700384</v>
      </c>
      <c r="CH36" s="7">
        <v>0.839647664647146</v>
      </c>
      <c r="CI36" s="7">
        <v>1056.58074807065</v>
      </c>
      <c r="CJ36" s="7">
        <v>1048.74215868434</v>
      </c>
      <c r="CK36" s="7">
        <v>608.820002329786</v>
      </c>
      <c r="CL36" s="7">
        <v>723.76267192571</v>
      </c>
      <c r="CM36" s="7">
        <v>550.642949003975</v>
      </c>
      <c r="CN36" s="7">
        <v>388.050143880888</v>
      </c>
      <c r="CO36" s="7">
        <v>-1.34616501825712</v>
      </c>
      <c r="CP36" s="7">
        <v>10.1875356723253</v>
      </c>
      <c r="CQ36" s="7">
        <v>1.77107244915669</v>
      </c>
      <c r="CR36" s="7">
        <v>-2.65278924425502</v>
      </c>
      <c r="CS36" s="7">
        <v>-1.96101292526646</v>
      </c>
      <c r="CT36" s="7">
        <v>2.64090364967615</v>
      </c>
    </row>
    <row r="37" spans="2:98" ht="15" customHeight="true">
      <c r="B37" s="6">
        <v>36</v>
      </c>
      <c r="C37" s="7">
        <v>1220.92517790788</v>
      </c>
      <c r="D37" s="7">
        <v>1121.70033318327</v>
      </c>
      <c r="E37" s="7">
        <v>1345.01793510171</v>
      </c>
      <c r="F37" s="7">
        <v>1292.81872683988</v>
      </c>
      <c r="G37" s="7">
        <v>1303.18989767344</v>
      </c>
      <c r="H37" s="7">
        <v>1385.27943981913</v>
      </c>
      <c r="I37" s="7">
        <v>1352.63404138769</v>
      </c>
      <c r="J37" s="7">
        <v>1359.73925021953</v>
      </c>
      <c r="K37" s="7">
        <v>1356.99103161358</v>
      </c>
      <c r="L37" s="7">
        <v>6.02275251469837</v>
      </c>
      <c r="M37" s="7">
        <v>-2.28351814341158</v>
      </c>
      <c r="N37" s="7">
        <v>-3.25005467303708</v>
      </c>
      <c r="O37" s="7">
        <v>1102.08587764729</v>
      </c>
      <c r="P37" s="7">
        <v>1275.90877762508</v>
      </c>
      <c r="Q37" s="7">
        <v>1232.12186755251</v>
      </c>
      <c r="R37" s="7">
        <v>1321.70002255332</v>
      </c>
      <c r="S37" s="7">
        <v>1313.40216392255</v>
      </c>
      <c r="T37" s="7">
        <v>1303.9017259397</v>
      </c>
      <c r="U37" s="7">
        <v>1325.17759046525</v>
      </c>
      <c r="V37" s="7">
        <v>1326.27702369837</v>
      </c>
      <c r="W37" s="7">
        <v>1333.71427236884</v>
      </c>
      <c r="X37" s="7">
        <v>-0.866605820346194</v>
      </c>
      <c r="Y37" s="7">
        <v>-1.36008972371474</v>
      </c>
      <c r="Z37" s="7">
        <v>-3.47451694679194</v>
      </c>
      <c r="AA37" s="7">
        <v>1331.61736254517</v>
      </c>
      <c r="AB37" s="7">
        <v>1399.91519004686</v>
      </c>
      <c r="AC37" s="7">
        <v>1445.2831031166</v>
      </c>
      <c r="AD37" s="7">
        <v>1473.90450156247</v>
      </c>
      <c r="AE37" s="7">
        <v>1515.99593605283</v>
      </c>
      <c r="AF37" s="7">
        <v>1494.16721023368</v>
      </c>
      <c r="AG37" s="7">
        <v>1568.72481925745</v>
      </c>
      <c r="AH37" s="7">
        <v>1509.9560355047</v>
      </c>
      <c r="AI37" s="7">
        <v>1381.12078687982</v>
      </c>
      <c r="AJ37" s="7">
        <v>-2.62768948080929</v>
      </c>
      <c r="AK37" s="7">
        <v>-2.98583741267294</v>
      </c>
      <c r="AL37" s="7">
        <v>-0.536856686037026</v>
      </c>
      <c r="AM37" s="7">
        <v>1163.54379174159</v>
      </c>
      <c r="AN37" s="7">
        <v>1284.24988447034</v>
      </c>
      <c r="AO37" s="7">
        <v>1318.5881568612</v>
      </c>
      <c r="AP37" s="7">
        <v>1405.1024616998</v>
      </c>
      <c r="AQ37" s="7">
        <v>1365.9675790014</v>
      </c>
      <c r="AR37" s="7">
        <v>1384.9173824953</v>
      </c>
      <c r="AS37" s="7">
        <v>1452.36798476951</v>
      </c>
      <c r="AT37" s="7">
        <v>1425.45459461697</v>
      </c>
      <c r="AU37" s="7">
        <v>1348.34322854359</v>
      </c>
      <c r="AV37" s="7">
        <v>3.4652553398214</v>
      </c>
      <c r="AW37" s="7">
        <v>0.508777806392572</v>
      </c>
      <c r="AX37" s="7">
        <v>-2.59177677330081</v>
      </c>
      <c r="AY37" s="7">
        <v>1310.3821596606</v>
      </c>
      <c r="AZ37" s="7">
        <v>1217.97986568848</v>
      </c>
      <c r="BA37" s="7">
        <v>943.649504287482</v>
      </c>
      <c r="BB37" s="7">
        <v>938.27333924799</v>
      </c>
      <c r="BC37" s="7">
        <v>792.616070295213</v>
      </c>
      <c r="BD37" s="7">
        <v>737.63670668887</v>
      </c>
      <c r="BE37" s="7">
        <v>45.8810358685696</v>
      </c>
      <c r="BF37" s="7">
        <v>42.2200910046649</v>
      </c>
      <c r="BG37" s="7">
        <v>0.142124329089711</v>
      </c>
      <c r="BH37" s="7">
        <v>0.132600364881</v>
      </c>
      <c r="BI37" s="7">
        <v>-2.66417743507509</v>
      </c>
      <c r="BJ37" s="7">
        <v>0.000398269697143405</v>
      </c>
      <c r="BK37" s="7">
        <v>1179.43964412004</v>
      </c>
      <c r="BL37" s="7">
        <v>1097.82957170951</v>
      </c>
      <c r="BM37" s="7">
        <v>782.749367702784</v>
      </c>
      <c r="BN37" s="7">
        <v>857.377342260081</v>
      </c>
      <c r="BO37" s="7">
        <v>641.127632501864</v>
      </c>
      <c r="BP37" s="7">
        <v>647.179384145972</v>
      </c>
      <c r="BQ37" s="7">
        <v>4.97334779896892</v>
      </c>
      <c r="BR37" s="7">
        <v>1.43153372234929</v>
      </c>
      <c r="BS37" s="7">
        <v>42.2612868346632</v>
      </c>
      <c r="BT37" s="7">
        <v>-3.97737997765989</v>
      </c>
      <c r="BU37" s="7">
        <v>-2.20525796884704</v>
      </c>
      <c r="BV37" s="7">
        <v>0.199719247291341</v>
      </c>
      <c r="BW37" s="7">
        <v>1275.66137529393</v>
      </c>
      <c r="BX37" s="7">
        <v>1205.28280401717</v>
      </c>
      <c r="BY37" s="7">
        <v>867.551828860546</v>
      </c>
      <c r="BZ37" s="7">
        <v>935.331961479456</v>
      </c>
      <c r="CA37" s="7">
        <v>717.834977958724</v>
      </c>
      <c r="CB37" s="7">
        <v>652.87755294482</v>
      </c>
      <c r="CC37" s="7">
        <v>1.31052817432419</v>
      </c>
      <c r="CD37" s="7">
        <v>-3.88482177378774</v>
      </c>
      <c r="CE37" s="7">
        <v>37.8232967376066</v>
      </c>
      <c r="CF37" s="7">
        <v>-2.632572697858</v>
      </c>
      <c r="CG37" s="7">
        <v>-2.39694398448</v>
      </c>
      <c r="CH37" s="7">
        <v>-0.856341346394402</v>
      </c>
      <c r="CI37" s="7">
        <v>1083.44205854002</v>
      </c>
      <c r="CJ37" s="7">
        <v>1097.39056388732</v>
      </c>
      <c r="CK37" s="7">
        <v>723.687164341826</v>
      </c>
      <c r="CL37" s="7">
        <v>836.958300122274</v>
      </c>
      <c r="CM37" s="7">
        <v>692.708655085557</v>
      </c>
      <c r="CN37" s="7">
        <v>467.654248359138</v>
      </c>
      <c r="CO37" s="7">
        <v>2.93889063694041</v>
      </c>
      <c r="CP37" s="7">
        <v>21.9062386386031</v>
      </c>
      <c r="CQ37" s="7">
        <v>6.60157500647574</v>
      </c>
      <c r="CR37" s="7">
        <v>0.881031032291503</v>
      </c>
      <c r="CS37" s="7">
        <v>1.93053717983503</v>
      </c>
      <c r="CT37" s="7">
        <v>-1.41356662261933</v>
      </c>
    </row>
    <row r="38" spans="2:98" ht="15" customHeight="true">
      <c r="B38" s="6">
        <v>37</v>
      </c>
      <c r="C38" s="7">
        <v>1226.07783574187</v>
      </c>
      <c r="D38" s="7">
        <v>1125.94463739561</v>
      </c>
      <c r="E38" s="7">
        <v>1345.54691953976</v>
      </c>
      <c r="F38" s="7">
        <v>1294.48293868335</v>
      </c>
      <c r="G38" s="7">
        <v>1307.56842796892</v>
      </c>
      <c r="H38" s="7">
        <v>1386.35573223391</v>
      </c>
      <c r="I38" s="7">
        <v>1353.45052848478</v>
      </c>
      <c r="J38" s="7">
        <v>1360.0800702138</v>
      </c>
      <c r="K38" s="7">
        <v>1355.33790217696</v>
      </c>
      <c r="L38" s="7">
        <v>0.0246479914608244</v>
      </c>
      <c r="M38" s="7">
        <v>-4.0208610930722</v>
      </c>
      <c r="N38" s="7">
        <v>-0.00820884623499296</v>
      </c>
      <c r="O38" s="7">
        <v>1107.68502057644</v>
      </c>
      <c r="P38" s="7">
        <v>1277.10642507966</v>
      </c>
      <c r="Q38" s="7">
        <v>1232.75489003039</v>
      </c>
      <c r="R38" s="7">
        <v>1323.74412589791</v>
      </c>
      <c r="S38" s="7">
        <v>1315.47590677859</v>
      </c>
      <c r="T38" s="7">
        <v>1305.68438486772</v>
      </c>
      <c r="U38" s="7">
        <v>1323.92366885974</v>
      </c>
      <c r="V38" s="7">
        <v>1325.86439332176</v>
      </c>
      <c r="W38" s="7">
        <v>1335.7152726036</v>
      </c>
      <c r="X38" s="7">
        <v>1.08013080602859</v>
      </c>
      <c r="Y38" s="7">
        <v>-2.93397494001329</v>
      </c>
      <c r="Z38" s="7">
        <v>0.489085969224106</v>
      </c>
      <c r="AA38" s="7">
        <v>1335.21950356446</v>
      </c>
      <c r="AB38" s="7">
        <v>1403.4716275739</v>
      </c>
      <c r="AC38" s="7">
        <v>1448.22937223222</v>
      </c>
      <c r="AD38" s="7">
        <v>1476.58880459192</v>
      </c>
      <c r="AE38" s="7">
        <v>1516.27121814043</v>
      </c>
      <c r="AF38" s="7">
        <v>1495.16998850957</v>
      </c>
      <c r="AG38" s="7">
        <v>1572.11681894822</v>
      </c>
      <c r="AH38" s="7">
        <v>1512.01151652598</v>
      </c>
      <c r="AI38" s="7">
        <v>1381.02511601048</v>
      </c>
      <c r="AJ38" s="7">
        <v>3.36868233064752</v>
      </c>
      <c r="AK38" s="7">
        <v>-0.0746861295237977</v>
      </c>
      <c r="AL38" s="7">
        <v>-1.997908851582</v>
      </c>
      <c r="AM38" s="7">
        <v>1165.92322587746</v>
      </c>
      <c r="AN38" s="7">
        <v>1288.7776559306</v>
      </c>
      <c r="AO38" s="7">
        <v>1320.85540075807</v>
      </c>
      <c r="AP38" s="7">
        <v>1424.02982343142</v>
      </c>
      <c r="AQ38" s="7">
        <v>1368.37455712883</v>
      </c>
      <c r="AR38" s="7">
        <v>1385.03855593391</v>
      </c>
      <c r="AS38" s="7">
        <v>1456.0050426772</v>
      </c>
      <c r="AT38" s="7">
        <v>1428.6787941465</v>
      </c>
      <c r="AU38" s="7">
        <v>1347.74849123722</v>
      </c>
      <c r="AV38" s="7">
        <v>2.35774239957345</v>
      </c>
      <c r="AW38" s="7">
        <v>0.937021388483117</v>
      </c>
      <c r="AX38" s="7">
        <v>-1.62226392950242</v>
      </c>
      <c r="AY38" s="7">
        <v>1337.96094877214</v>
      </c>
      <c r="AZ38" s="7">
        <v>1265.07211127638</v>
      </c>
      <c r="BA38" s="7">
        <v>1059.12457042664</v>
      </c>
      <c r="BB38" s="7">
        <v>1060.83339281428</v>
      </c>
      <c r="BC38" s="7">
        <v>928.537383285862</v>
      </c>
      <c r="BD38" s="7">
        <v>888.518983513616</v>
      </c>
      <c r="BE38" s="7">
        <v>93.144617262315</v>
      </c>
      <c r="BF38" s="7">
        <v>89.9927018054673</v>
      </c>
      <c r="BG38" s="7">
        <v>-1.72859389430596</v>
      </c>
      <c r="BH38" s="7">
        <v>2.55923788101018</v>
      </c>
      <c r="BI38" s="7">
        <v>-2.86288349902952</v>
      </c>
      <c r="BJ38" s="7">
        <v>0.814699143922553</v>
      </c>
      <c r="BK38" s="7">
        <v>1200.8524799132</v>
      </c>
      <c r="BL38" s="7">
        <v>1139.84100193538</v>
      </c>
      <c r="BM38" s="7">
        <v>882.301161154738</v>
      </c>
      <c r="BN38" s="7">
        <v>959.996769072069</v>
      </c>
      <c r="BO38" s="7">
        <v>767.365442294237</v>
      </c>
      <c r="BP38" s="7">
        <v>778.631483020144</v>
      </c>
      <c r="BQ38" s="7">
        <v>13.1286362740898</v>
      </c>
      <c r="BR38" s="7">
        <v>-4.68338670297771</v>
      </c>
      <c r="BS38" s="7">
        <v>81.8859086377115</v>
      </c>
      <c r="BT38" s="7">
        <v>0.185355943743161</v>
      </c>
      <c r="BU38" s="7">
        <v>0.605006062919529</v>
      </c>
      <c r="BV38" s="7">
        <v>4.4115487024128</v>
      </c>
      <c r="BW38" s="7">
        <v>1301.58977742806</v>
      </c>
      <c r="BX38" s="7">
        <v>1250.21854147749</v>
      </c>
      <c r="BY38" s="7">
        <v>981.443077130619</v>
      </c>
      <c r="BZ38" s="7">
        <v>1048.13103380038</v>
      </c>
      <c r="CA38" s="7">
        <v>857.107888856881</v>
      </c>
      <c r="CB38" s="7">
        <v>782.843409425375</v>
      </c>
      <c r="CC38" s="7">
        <v>-1.94543004014804</v>
      </c>
      <c r="CD38" s="7">
        <v>-0.358907137289862</v>
      </c>
      <c r="CE38" s="7">
        <v>72.0357036331484</v>
      </c>
      <c r="CF38" s="7">
        <v>1.27107424724818</v>
      </c>
      <c r="CG38" s="7">
        <v>-3.37148672348303</v>
      </c>
      <c r="CH38" s="7">
        <v>1.35536742408112</v>
      </c>
      <c r="CI38" s="7">
        <v>1102.64260041802</v>
      </c>
      <c r="CJ38" s="7">
        <v>1137.19367352443</v>
      </c>
      <c r="CK38" s="7">
        <v>822.223738660296</v>
      </c>
      <c r="CL38" s="7">
        <v>928.777439059608</v>
      </c>
      <c r="CM38" s="7">
        <v>819.147626362468</v>
      </c>
      <c r="CN38" s="7">
        <v>541.679450640092</v>
      </c>
      <c r="CO38" s="7">
        <v>-0.934370681842665</v>
      </c>
      <c r="CP38" s="7">
        <v>47.9081416362656</v>
      </c>
      <c r="CQ38" s="7">
        <v>15.6289099345286</v>
      </c>
      <c r="CR38" s="7">
        <v>-4.99102787416405</v>
      </c>
      <c r="CS38" s="7">
        <v>1.50648582368467</v>
      </c>
      <c r="CT38" s="7">
        <v>-2.6492180293485</v>
      </c>
    </row>
    <row r="39" spans="2:98" ht="15" customHeight="true">
      <c r="B39" s="6">
        <v>38</v>
      </c>
      <c r="C39" s="7">
        <v>1230.1900471374</v>
      </c>
      <c r="D39" s="7">
        <v>1130.83154404374</v>
      </c>
      <c r="E39" s="7">
        <v>1349.78362511442</v>
      </c>
      <c r="F39" s="7">
        <v>1296.75486859859</v>
      </c>
      <c r="G39" s="7">
        <v>1308.91250535334</v>
      </c>
      <c r="H39" s="7">
        <v>1387.37977922909</v>
      </c>
      <c r="I39" s="7">
        <v>1356.72863478516</v>
      </c>
      <c r="J39" s="7">
        <v>1360.43817013721</v>
      </c>
      <c r="K39" s="7">
        <v>1354.23537780684</v>
      </c>
      <c r="L39" s="7">
        <v>-4.3596085005579</v>
      </c>
      <c r="M39" s="7">
        <v>1.95472884179981</v>
      </c>
      <c r="N39" s="7">
        <v>-0.111854655253865</v>
      </c>
      <c r="O39" s="7">
        <v>1109.46278424342</v>
      </c>
      <c r="P39" s="7">
        <v>1280.35892382779</v>
      </c>
      <c r="Q39" s="7">
        <v>1233.40551694313</v>
      </c>
      <c r="R39" s="7">
        <v>1325.49982479113</v>
      </c>
      <c r="S39" s="7">
        <v>1314.99197674064</v>
      </c>
      <c r="T39" s="7">
        <v>1309.72325088346</v>
      </c>
      <c r="U39" s="7">
        <v>1323.42608894202</v>
      </c>
      <c r="V39" s="7">
        <v>1326.92518112958</v>
      </c>
      <c r="W39" s="7">
        <v>1336.19036585504</v>
      </c>
      <c r="X39" s="7">
        <v>-0.855032145026144</v>
      </c>
      <c r="Y39" s="7">
        <v>-3.07727672583405</v>
      </c>
      <c r="Z39" s="7">
        <v>1.05316704840425</v>
      </c>
      <c r="AA39" s="7">
        <v>1340.79382804722</v>
      </c>
      <c r="AB39" s="7">
        <v>1408.95603466119</v>
      </c>
      <c r="AC39" s="7">
        <v>1449.54467564032</v>
      </c>
      <c r="AD39" s="7">
        <v>1480.73760189874</v>
      </c>
      <c r="AE39" s="7">
        <v>1518.1425004451</v>
      </c>
      <c r="AF39" s="7">
        <v>1498.3851656021</v>
      </c>
      <c r="AG39" s="7">
        <v>1575.25529855163</v>
      </c>
      <c r="AH39" s="7">
        <v>1510.90128207578</v>
      </c>
      <c r="AI39" s="7">
        <v>1379.02735491143</v>
      </c>
      <c r="AJ39" s="7">
        <v>-1.37722068852736</v>
      </c>
      <c r="AK39" s="7">
        <v>-2.90850284168528</v>
      </c>
      <c r="AL39" s="7">
        <v>0.357226153661486</v>
      </c>
      <c r="AM39" s="7">
        <v>1170.12159565441</v>
      </c>
      <c r="AN39" s="7">
        <v>1295.85012005637</v>
      </c>
      <c r="AO39" s="7">
        <v>1326.12221320198</v>
      </c>
      <c r="AP39" s="7">
        <v>1431.88651055208</v>
      </c>
      <c r="AQ39" s="7">
        <v>1370.44064200601</v>
      </c>
      <c r="AR39" s="7">
        <v>1387.47678128122</v>
      </c>
      <c r="AS39" s="7">
        <v>1459.18260049697</v>
      </c>
      <c r="AT39" s="7">
        <v>1431.28188974364</v>
      </c>
      <c r="AU39" s="7">
        <v>1345.95973516428</v>
      </c>
      <c r="AV39" s="7">
        <v>-0.912925615544736</v>
      </c>
      <c r="AW39" s="7">
        <v>-0.143199830736648</v>
      </c>
      <c r="AX39" s="7">
        <v>0.593350847614602</v>
      </c>
      <c r="AY39" s="7">
        <v>1358.31234667043</v>
      </c>
      <c r="AZ39" s="7">
        <v>1300.80527780194</v>
      </c>
      <c r="BA39" s="7">
        <v>1155.5455535595</v>
      </c>
      <c r="BB39" s="7">
        <v>1160.39507757375</v>
      </c>
      <c r="BC39" s="7">
        <v>1046.02036285836</v>
      </c>
      <c r="BD39" s="7">
        <v>1015.88717082906</v>
      </c>
      <c r="BE39" s="7">
        <v>168.833438734194</v>
      </c>
      <c r="BF39" s="7">
        <v>164.327240887238</v>
      </c>
      <c r="BG39" s="7">
        <v>-3.75775203148896</v>
      </c>
      <c r="BH39" s="7">
        <v>-0.418361600779463</v>
      </c>
      <c r="BI39" s="7">
        <v>-2.73351428835213</v>
      </c>
      <c r="BJ39" s="7">
        <v>-1.2170773272087</v>
      </c>
      <c r="BK39" s="7">
        <v>1219.19589730485</v>
      </c>
      <c r="BL39" s="7">
        <v>1171.90130225599</v>
      </c>
      <c r="BM39" s="7">
        <v>965.400109386201</v>
      </c>
      <c r="BN39" s="7">
        <v>1040.56246320429</v>
      </c>
      <c r="BO39" s="7">
        <v>875.729477480569</v>
      </c>
      <c r="BP39" s="7">
        <v>892.795296718791</v>
      </c>
      <c r="BQ39" s="7">
        <v>25.7579661242503</v>
      </c>
      <c r="BR39" s="7">
        <v>2.01780258002282</v>
      </c>
      <c r="BS39" s="7">
        <v>161.450531196469</v>
      </c>
      <c r="BT39" s="7">
        <v>-0.557460980161068</v>
      </c>
      <c r="BU39" s="7">
        <v>3.23200549394596</v>
      </c>
      <c r="BV39" s="7">
        <v>-1.437434678312</v>
      </c>
      <c r="BW39" s="7">
        <v>1321.2966749291</v>
      </c>
      <c r="BX39" s="7">
        <v>1284.01813529948</v>
      </c>
      <c r="BY39" s="7">
        <v>1077.60008825072</v>
      </c>
      <c r="BZ39" s="7">
        <v>1140.68249110701</v>
      </c>
      <c r="CA39" s="7">
        <v>975.590854569888</v>
      </c>
      <c r="CB39" s="7">
        <v>891.359113850119</v>
      </c>
      <c r="CC39" s="7">
        <v>1.25327373240179</v>
      </c>
      <c r="CD39" s="7">
        <v>2.68268272434398</v>
      </c>
      <c r="CE39" s="7">
        <v>140.206822004469</v>
      </c>
      <c r="CF39" s="7">
        <v>2.95753591646917</v>
      </c>
      <c r="CG39" s="7">
        <v>3.45865741205898</v>
      </c>
      <c r="CH39" s="7">
        <v>1.75755121912152</v>
      </c>
      <c r="CI39" s="7">
        <v>1118.46803951401</v>
      </c>
      <c r="CJ39" s="7">
        <v>1165.86063952321</v>
      </c>
      <c r="CK39" s="7">
        <v>903.651560588297</v>
      </c>
      <c r="CL39" s="7">
        <v>1002.96350550263</v>
      </c>
      <c r="CM39" s="7">
        <v>923.567749323636</v>
      </c>
      <c r="CN39" s="7">
        <v>603.046577494365</v>
      </c>
      <c r="CO39" s="7">
        <v>-3.54887434454668</v>
      </c>
      <c r="CP39" s="7">
        <v>94.9243855187879</v>
      </c>
      <c r="CQ39" s="7">
        <v>41.5774329516294</v>
      </c>
      <c r="CR39" s="7">
        <v>-1.64168909477667</v>
      </c>
      <c r="CS39" s="7">
        <v>1.10944956804133</v>
      </c>
      <c r="CT39" s="7">
        <v>-3.33239846173547</v>
      </c>
    </row>
    <row r="40" spans="2:98" ht="15" customHeight="true">
      <c r="B40" s="6">
        <v>39</v>
      </c>
      <c r="C40" s="7">
        <v>1235.95942807667</v>
      </c>
      <c r="D40" s="7">
        <v>1135.65736249163</v>
      </c>
      <c r="E40" s="7">
        <v>1353.35614862346</v>
      </c>
      <c r="F40" s="7">
        <v>1298.50215390428</v>
      </c>
      <c r="G40" s="7">
        <v>1311.43721564373</v>
      </c>
      <c r="H40" s="7">
        <v>1387.19268978139</v>
      </c>
      <c r="I40" s="7">
        <v>1357.8558361013</v>
      </c>
      <c r="J40" s="7">
        <v>1360.80089426702</v>
      </c>
      <c r="K40" s="7">
        <v>1352.61713273424</v>
      </c>
      <c r="L40" s="7">
        <v>-1.04504810650769</v>
      </c>
      <c r="M40" s="7">
        <v>0.29721429724168</v>
      </c>
      <c r="N40" s="7">
        <v>0.0604916436150234</v>
      </c>
      <c r="O40" s="7">
        <v>1114.91338468301</v>
      </c>
      <c r="P40" s="7">
        <v>1286.16479576923</v>
      </c>
      <c r="Q40" s="7">
        <v>1236.08049161252</v>
      </c>
      <c r="R40" s="7">
        <v>1328.09923853503</v>
      </c>
      <c r="S40" s="7">
        <v>1319.05948269</v>
      </c>
      <c r="T40" s="7">
        <v>1310.83264158591</v>
      </c>
      <c r="U40" s="7">
        <v>1326.60102129118</v>
      </c>
      <c r="V40" s="7">
        <v>1327.71054471452</v>
      </c>
      <c r="W40" s="7">
        <v>1336.08832569804</v>
      </c>
      <c r="X40" s="7">
        <v>0.410729245132643</v>
      </c>
      <c r="Y40" s="7">
        <v>-4.74169903572556</v>
      </c>
      <c r="Z40" s="7">
        <v>-3.23451789599221</v>
      </c>
      <c r="AA40" s="7">
        <v>1349.67348658397</v>
      </c>
      <c r="AB40" s="7">
        <v>1413.23814808624</v>
      </c>
      <c r="AC40" s="7">
        <v>1449.42185086015</v>
      </c>
      <c r="AD40" s="7">
        <v>1484.52782039402</v>
      </c>
      <c r="AE40" s="7">
        <v>1519.82573168978</v>
      </c>
      <c r="AF40" s="7">
        <v>1502.29981475641</v>
      </c>
      <c r="AG40" s="7">
        <v>1578.99687202044</v>
      </c>
      <c r="AH40" s="7">
        <v>1507.53516504355</v>
      </c>
      <c r="AI40" s="7">
        <v>1379.42120090835</v>
      </c>
      <c r="AJ40" s="7">
        <v>-2.29330729701633</v>
      </c>
      <c r="AK40" s="7">
        <v>-5.16624078897075</v>
      </c>
      <c r="AL40" s="7">
        <v>-2.20536065059514</v>
      </c>
      <c r="AM40" s="7">
        <v>1177.15744337535</v>
      </c>
      <c r="AN40" s="7">
        <v>1299.63485456303</v>
      </c>
      <c r="AO40" s="7">
        <v>1328.3193638651</v>
      </c>
      <c r="AP40" s="7">
        <v>1438.31804971292</v>
      </c>
      <c r="AQ40" s="7">
        <v>1372.53301184585</v>
      </c>
      <c r="AR40" s="7">
        <v>1391.52853015403</v>
      </c>
      <c r="AS40" s="7">
        <v>1460.74282184913</v>
      </c>
      <c r="AT40" s="7">
        <v>1434.21297948899</v>
      </c>
      <c r="AU40" s="7">
        <v>1345.97701563037</v>
      </c>
      <c r="AV40" s="7">
        <v>-0.562840024806519</v>
      </c>
      <c r="AW40" s="7">
        <v>-0.358207695865076</v>
      </c>
      <c r="AX40" s="7">
        <v>-1.54533314265291</v>
      </c>
      <c r="AY40" s="7">
        <v>1373.28165508563</v>
      </c>
      <c r="AZ40" s="7">
        <v>1329.15391122331</v>
      </c>
      <c r="BA40" s="7">
        <v>1233.29269325387</v>
      </c>
      <c r="BB40" s="7">
        <v>1239.2542714374</v>
      </c>
      <c r="BC40" s="7">
        <v>1141.54574456822</v>
      </c>
      <c r="BD40" s="7">
        <v>1122.74951771004</v>
      </c>
      <c r="BE40" s="7">
        <v>300.373425022849</v>
      </c>
      <c r="BF40" s="7">
        <v>298.041944401628</v>
      </c>
      <c r="BG40" s="7">
        <v>-3.9625390569222</v>
      </c>
      <c r="BH40" s="7">
        <v>-2.16275825129424</v>
      </c>
      <c r="BI40" s="7">
        <v>-5.18688603790588</v>
      </c>
      <c r="BJ40" s="7">
        <v>-3.84026545809957</v>
      </c>
      <c r="BK40" s="7">
        <v>1233.53020888004</v>
      </c>
      <c r="BL40" s="7">
        <v>1195.54919763028</v>
      </c>
      <c r="BM40" s="7">
        <v>1033.83464450134</v>
      </c>
      <c r="BN40" s="7">
        <v>1106.39397549216</v>
      </c>
      <c r="BO40" s="7">
        <v>965.231537041992</v>
      </c>
      <c r="BP40" s="7">
        <v>987.218616704256</v>
      </c>
      <c r="BQ40" s="7">
        <v>61.786997220298</v>
      </c>
      <c r="BR40" s="7">
        <v>-5.22445068810339</v>
      </c>
      <c r="BS40" s="7">
        <v>289.285297259316</v>
      </c>
      <c r="BT40" s="7">
        <v>-0.395393726706516</v>
      </c>
      <c r="BU40" s="7">
        <v>3.60312234295452</v>
      </c>
      <c r="BV40" s="7">
        <v>1.34381134633122</v>
      </c>
      <c r="BW40" s="7">
        <v>1337.97333809333</v>
      </c>
      <c r="BX40" s="7">
        <v>1308.08085411243</v>
      </c>
      <c r="BY40" s="7">
        <v>1155.75206220436</v>
      </c>
      <c r="BZ40" s="7">
        <v>1213.03379235969</v>
      </c>
      <c r="CA40" s="7">
        <v>1078.44732885751</v>
      </c>
      <c r="CB40" s="7">
        <v>981.729838020183</v>
      </c>
      <c r="CC40" s="7">
        <v>0.582246891714931</v>
      </c>
      <c r="CD40" s="7">
        <v>6.18182563961773</v>
      </c>
      <c r="CE40" s="7">
        <v>251.862030262942</v>
      </c>
      <c r="CF40" s="7">
        <v>-3.92222306802614</v>
      </c>
      <c r="CG40" s="7">
        <v>1.77539419848108</v>
      </c>
      <c r="CH40" s="7">
        <v>1.21591015138665</v>
      </c>
      <c r="CI40" s="7">
        <v>1131.04898937697</v>
      </c>
      <c r="CJ40" s="7">
        <v>1190.62307167116</v>
      </c>
      <c r="CK40" s="7">
        <v>969.474876352884</v>
      </c>
      <c r="CL40" s="7">
        <v>1061.8726542983</v>
      </c>
      <c r="CM40" s="7">
        <v>1009.32262824768</v>
      </c>
      <c r="CN40" s="7">
        <v>647.139048413009</v>
      </c>
      <c r="CO40" s="7">
        <v>-3.22530329259689</v>
      </c>
      <c r="CP40" s="7">
        <v>169.458551509247</v>
      </c>
      <c r="CQ40" s="7">
        <v>72.5361619060936</v>
      </c>
      <c r="CR40" s="7">
        <v>1.11721154198767</v>
      </c>
      <c r="CS40" s="7">
        <v>-2.60752349861741</v>
      </c>
      <c r="CT40" s="7">
        <v>1.93772176816583</v>
      </c>
    </row>
    <row r="41" spans="2:98" ht="15" customHeight="true">
      <c r="B41" s="6">
        <v>40</v>
      </c>
      <c r="C41" s="7">
        <v>1242.20128933232</v>
      </c>
      <c r="D41" s="7">
        <v>1138.82601139578</v>
      </c>
      <c r="E41" s="7">
        <v>1356.85890340445</v>
      </c>
      <c r="F41" s="7">
        <v>1302.21302327208</v>
      </c>
      <c r="G41" s="7">
        <v>1315.04188094299</v>
      </c>
      <c r="H41" s="7">
        <v>1389.70313518948</v>
      </c>
      <c r="I41" s="7">
        <v>1361.9736820574</v>
      </c>
      <c r="J41" s="7">
        <v>1363.82618776217</v>
      </c>
      <c r="K41" s="7">
        <v>1355.40640536576</v>
      </c>
      <c r="L41" s="7">
        <v>0.420316488839944</v>
      </c>
      <c r="M41" s="7">
        <v>-2.9483500744459</v>
      </c>
      <c r="N41" s="7">
        <v>1.25576107251118</v>
      </c>
      <c r="O41" s="7">
        <v>1120.51682731284</v>
      </c>
      <c r="P41" s="7">
        <v>1298.19647204445</v>
      </c>
      <c r="Q41" s="7">
        <v>1240.06273754191</v>
      </c>
      <c r="R41" s="7">
        <v>1330.20921653911</v>
      </c>
      <c r="S41" s="7">
        <v>1325.4221364125</v>
      </c>
      <c r="T41" s="7">
        <v>1314.15451223143</v>
      </c>
      <c r="U41" s="7">
        <v>1334.71217227542</v>
      </c>
      <c r="V41" s="7">
        <v>1328.96384553587</v>
      </c>
      <c r="W41" s="7">
        <v>1337.18922821469</v>
      </c>
      <c r="X41" s="7">
        <v>-2.88930472976017</v>
      </c>
      <c r="Y41" s="7">
        <v>1.47620352047625</v>
      </c>
      <c r="Z41" s="7">
        <v>1.46287356083576</v>
      </c>
      <c r="AA41" s="7">
        <v>1359.78634795199</v>
      </c>
      <c r="AB41" s="7">
        <v>1421.58218063235</v>
      </c>
      <c r="AC41" s="7">
        <v>1449.22495765126</v>
      </c>
      <c r="AD41" s="7">
        <v>1487.36066591305</v>
      </c>
      <c r="AE41" s="7">
        <v>1524.69658254148</v>
      </c>
      <c r="AF41" s="7">
        <v>1509.32769058333</v>
      </c>
      <c r="AG41" s="7">
        <v>1582.64198616641</v>
      </c>
      <c r="AH41" s="7">
        <v>1503.84981551735</v>
      </c>
      <c r="AI41" s="7">
        <v>1379.56120231221</v>
      </c>
      <c r="AJ41" s="7">
        <v>-3.94391258416908</v>
      </c>
      <c r="AK41" s="7">
        <v>0.709756930055391</v>
      </c>
      <c r="AL41" s="7">
        <v>-1.59379483486236</v>
      </c>
      <c r="AM41" s="7">
        <v>1186.62870646336</v>
      </c>
      <c r="AN41" s="7">
        <v>1301.70554989994</v>
      </c>
      <c r="AO41" s="7">
        <v>1330.66935671847</v>
      </c>
      <c r="AP41" s="7">
        <v>1426.74033313305</v>
      </c>
      <c r="AQ41" s="7">
        <v>1377.40680126797</v>
      </c>
      <c r="AR41" s="7">
        <v>1397.83218641389</v>
      </c>
      <c r="AS41" s="7">
        <v>1462.99391586171</v>
      </c>
      <c r="AT41" s="7">
        <v>1439.0636827725</v>
      </c>
      <c r="AU41" s="7">
        <v>1345.1898464369</v>
      </c>
      <c r="AV41" s="7">
        <v>2.14656434358631</v>
      </c>
      <c r="AW41" s="7">
        <v>2.9818256382232</v>
      </c>
      <c r="AX41" s="7">
        <v>1.43205879291872</v>
      </c>
      <c r="AY41" s="7">
        <v>1385.04208876968</v>
      </c>
      <c r="AZ41" s="7">
        <v>1354.04404389473</v>
      </c>
      <c r="BA41" s="7">
        <v>1304.15341611167</v>
      </c>
      <c r="BB41" s="7">
        <v>1310.89475461559</v>
      </c>
      <c r="BC41" s="7">
        <v>1228.16936671836</v>
      </c>
      <c r="BD41" s="7">
        <v>1221.58862311958</v>
      </c>
      <c r="BE41" s="7">
        <v>490.02070208958</v>
      </c>
      <c r="BF41" s="7">
        <v>480.17038519758</v>
      </c>
      <c r="BG41" s="7">
        <v>-0.0493485995903029</v>
      </c>
      <c r="BH41" s="7">
        <v>-3.53916542462639</v>
      </c>
      <c r="BI41" s="7">
        <v>-1.83055090264406</v>
      </c>
      <c r="BJ41" s="7">
        <v>1.17184130399392</v>
      </c>
      <c r="BK41" s="7">
        <v>1250.04203490785</v>
      </c>
      <c r="BL41" s="7">
        <v>1217.43924556374</v>
      </c>
      <c r="BM41" s="7">
        <v>1096.58968064852</v>
      </c>
      <c r="BN41" s="7">
        <v>1167.49500576623</v>
      </c>
      <c r="BO41" s="7">
        <v>1045.53004673172</v>
      </c>
      <c r="BP41" s="7">
        <v>1072.15403868806</v>
      </c>
      <c r="BQ41" s="7">
        <v>115.288713862602</v>
      </c>
      <c r="BR41" s="7">
        <v>-0.72657406180906</v>
      </c>
      <c r="BS41" s="7">
        <v>457.953266049606</v>
      </c>
      <c r="BT41" s="7">
        <v>-1.72840541395044</v>
      </c>
      <c r="BU41" s="7">
        <v>-8.09420935637445</v>
      </c>
      <c r="BV41" s="7">
        <v>-1.8684008731484</v>
      </c>
      <c r="BW41" s="7">
        <v>1353.4211792534</v>
      </c>
      <c r="BX41" s="7">
        <v>1331.06791761719</v>
      </c>
      <c r="BY41" s="7">
        <v>1224.21494461502</v>
      </c>
      <c r="BZ41" s="7">
        <v>1276.67974113471</v>
      </c>
      <c r="CA41" s="7">
        <v>1175.76408501253</v>
      </c>
      <c r="CB41" s="7">
        <v>1066.64424202558</v>
      </c>
      <c r="CC41" s="7">
        <v>2.02253533843896</v>
      </c>
      <c r="CD41" s="7">
        <v>10.4953156386587</v>
      </c>
      <c r="CE41" s="7">
        <v>414.225555691127</v>
      </c>
      <c r="CF41" s="7">
        <v>0.492520373167736</v>
      </c>
      <c r="CG41" s="7">
        <v>0.748281534165926</v>
      </c>
      <c r="CH41" s="7">
        <v>-0.402440868107078</v>
      </c>
      <c r="CI41" s="7">
        <v>1145.29611381717</v>
      </c>
      <c r="CJ41" s="7">
        <v>1213.47943839442</v>
      </c>
      <c r="CK41" s="7">
        <v>1025.74936816842</v>
      </c>
      <c r="CL41" s="7">
        <v>1117.63831626374</v>
      </c>
      <c r="CM41" s="7">
        <v>1087.29050585847</v>
      </c>
      <c r="CN41" s="7">
        <v>680.47585864041</v>
      </c>
      <c r="CO41" s="7">
        <v>3.22388095460747</v>
      </c>
      <c r="CP41" s="7">
        <v>302.311261496166</v>
      </c>
      <c r="CQ41" s="7">
        <v>135.407999455566</v>
      </c>
      <c r="CR41" s="7">
        <v>-1.85473981809628</v>
      </c>
      <c r="CS41" s="7">
        <v>-2.44138009142807</v>
      </c>
      <c r="CT41" s="7">
        <v>2.77566185985006</v>
      </c>
    </row>
  </sheetData>
  <printOptions headings="true" gridLines="true" />
  <pageMargins left="0" right="0" top="0" bottom="0" header="0" footer="0" />
  <pageSetup paperSize="0" scale="0" pageOrder="overThenDown" orientation="portrait" blackAndWhite="true" useFirstPageNumber="true" />
  <headerFooter />
</worksheet>
