# Supplementary material for: PLA2G16 expression predicts prognosis and gemcitabine sensitivity in patients with pancreatic cancer
Source: PeerJ journal article supplement (doi:10.7717/peerj.19517), 2025-05-30
Supplement: FIG3B3I.zip [file admin_2023-08-31 11-19-35_CT052869 - Quantification Cq Results.xlsx › xl/worksheets/sheet1.xml]

<?xml version="1.0"?>
<worksheet xmlns:xsi="http://www.w3.org/2001/XMLSchema-instance" xmlns:xsd="http://www.w3.org/2001/XMLSchema" xmlns="http://schemas.openxmlformats.org/spreadsheetml/2006/main">
  <sheetPr>
    <pageSetUpPr />
  </sheetPr>
  <dimension ref="A1:P97" />
  <sheetViews>
    <sheetView tabSelected="true" workbookViewId="0">
      <pane xSplit="1" ySplit="1" topLeftCell="B2" state="frozen" />
      <selection pane="bottomRight" activeCell="B2" sqref="B2:B2" />
      <selection pane="topRight" activeCell="B2" sqref="B2:B2" />
      <selection pane="bottomLeft" activeCell="B2" sqref="B2:B2" />
      <selection activeCell="B2" sqref="B2:B2" />
    </sheetView>
  </sheetViews>
  <sheetFormatPr defaultColWidth="10" defaultRowHeight="15" customHeight="true" />
  <cols>
    <col min="1" max="1" width="1.5" style="4" customWidth="true" />
    <col min="2" max="2" width="10" style="6" customWidth="true" />
    <col min="3" max="3" width="10" style="7" customWidth="true" />
    <col min="4" max="4" width="13.33" style="8" customWidth="true" />
    <col min="5" max="5" width="11.67" style="8" customWidth="true" />
    <col min="6" max="6" width="15" style="8" customWidth="true" />
    <col min="7" max="7" width="15" style="8" hidden="true" customWidth="true" />
    <col min="8" max="8" width="15" style="9" customWidth="true" />
    <col min="9" max="9" width="13.33" style="9" customWidth="true" />
    <col min="10" max="10" width="15" style="10" customWidth="true" />
    <col min="11" max="11" width="18.33" style="11" hidden="true" customWidth="true" />
    <col min="12" max="12" width="18.33" style="10" hidden="true" customWidth="true" />
    <col min="13" max="14" width="18.33" style="11" hidden="true" customWidth="true" />
    <col min="15" max="15" width="10" style="12" hidden="true" customWidth="true" />
    <col min="16" max="16" width="18.33" style="8" hidden="true" customWidth="true" />
    <col min="17" max="16384" width="10" style="1" customWidth="true" />
  </cols>
  <sheetData>
    <row r="1" spans="1:16" s="2" customFormat="true" ht="30" customHeight="true">
      <c r="A1" s="5" />
      <c r="B1" s="3" t="s">
        <v>0</v>
      </c>
      <c r="C1" s="3" t="s">
        <v>1</v>
      </c>
      <c r="D1" s="3" t="s">
        <v>2</v>
      </c>
      <c r="E1" s="3" t="s">
        <v>3</v>
      </c>
      <c r="F1" s="3" t="s">
        <v>4</v>
      </c>
      <c r="G1" s="3" t="s">
        <v>5</v>
      </c>
      <c r="H1" s="3" t="s">
        <v>6</v>
      </c>
      <c r="I1" s="3" t="s">
        <v>7</v>
      </c>
      <c r="J1" s="3" t="s">
        <v>8</v>
      </c>
      <c r="K1" s="3" t="s">
        <v>9</v>
      </c>
      <c r="L1" s="3" t="s">
        <v>10</v>
      </c>
      <c r="M1" s="3" t="s">
        <v>11</v>
      </c>
      <c r="N1" s="3" t="s">
        <v>12</v>
      </c>
      <c r="O1" s="3" t="s">
        <v>13</v>
      </c>
      <c r="P1" s="3" t="s">
        <v>14</v>
      </c>
    </row>
    <row r="2" spans="2:16" ht="15" customHeight="true">
      <c r="B2" s="6" t="s">
        <v>15</v>
      </c>
      <c r="C2" s="7" t="s">
        <v>16</v>
      </c>
      <c r="D2" s="8" t="s">
        <v>17</v>
      </c>
      <c r="E2" s="8" t="s">
        <v>18</v>
      </c>
      <c r="F2" s="8" t="s">
        <v>17</v>
      </c>
      <c r="G2" s="8" t="s">
        <v>17</v>
      </c>
      <c r="H2" s="9">
        <v>17.052191779944</v>
      </c>
      <c r="I2" s="9">
        <v>17.052191779944</v>
      </c>
      <c r="J2" s="10">
        <v>0</v>
      </c>
      <c r="K2" s="11" />
      <c r="L2" s="10" />
      <c r="M2" s="11" />
      <c r="N2" s="11">
        <v>0</v>
      </c>
      <c r="O2" s="12">
        <v>63</v>
      </c>
      <c r="P2" s="8" t="s">
        <v>17</v>
      </c>
    </row>
    <row r="3" spans="2:16" ht="15" customHeight="true">
      <c r="B3" s="6" t="s">
        <v>19</v>
      </c>
      <c r="C3" s="7" t="s">
        <v>16</v>
      </c>
      <c r="D3" s="8" t="s">
        <v>17</v>
      </c>
      <c r="E3" s="8" t="s">
        <v>18</v>
      </c>
      <c r="F3" s="8" t="s">
        <v>17</v>
      </c>
      <c r="G3" s="8" t="s">
        <v>17</v>
      </c>
      <c r="H3" s="9">
        <v>16.9898558127268</v>
      </c>
      <c r="I3" s="9">
        <v>16.9898558127268</v>
      </c>
      <c r="J3" s="10">
        <v>0</v>
      </c>
      <c r="K3" s="11" />
      <c r="L3" s="10" />
      <c r="M3" s="11" />
      <c r="N3" s="11">
        <v>0</v>
      </c>
      <c r="O3" s="12">
        <v>63</v>
      </c>
      <c r="P3" s="8" t="s">
        <v>17</v>
      </c>
    </row>
    <row r="4" spans="2:16" ht="15" customHeight="true">
      <c r="B4" s="6" t="s">
        <v>20</v>
      </c>
      <c r="C4" s="7" t="s">
        <v>16</v>
      </c>
      <c r="D4" s="8" t="s">
        <v>17</v>
      </c>
      <c r="E4" s="8" t="s">
        <v>18</v>
      </c>
      <c r="F4" s="8" t="s">
        <v>17</v>
      </c>
      <c r="G4" s="8" t="s">
        <v>17</v>
      </c>
      <c r="H4" s="9">
        <v>18.2457181700645</v>
      </c>
      <c r="I4" s="9">
        <v>18.2457181700645</v>
      </c>
      <c r="J4" s="10">
        <v>0</v>
      </c>
      <c r="K4" s="11" />
      <c r="L4" s="10" />
      <c r="M4" s="11" />
      <c r="N4" s="11">
        <v>0</v>
      </c>
      <c r="O4" s="12">
        <v>63</v>
      </c>
      <c r="P4" s="8" t="s">
        <v>17</v>
      </c>
    </row>
    <row r="5" spans="2:16" ht="15" customHeight="true">
      <c r="B5" s="6" t="s">
        <v>21</v>
      </c>
      <c r="C5" s="7" t="s">
        <v>16</v>
      </c>
      <c r="D5" s="8" t="s">
        <v>17</v>
      </c>
      <c r="E5" s="8" t="s">
        <v>18</v>
      </c>
      <c r="F5" s="8" t="s">
        <v>17</v>
      </c>
      <c r="G5" s="8" t="s">
        <v>17</v>
      </c>
      <c r="H5" s="9">
        <v>19.157857769575</v>
      </c>
      <c r="I5" s="9">
        <v>19.157857769575</v>
      </c>
      <c r="J5" s="10">
        <v>0</v>
      </c>
      <c r="K5" s="11" />
      <c r="L5" s="10" />
      <c r="M5" s="11" />
      <c r="N5" s="11">
        <v>0</v>
      </c>
      <c r="O5" s="12">
        <v>63</v>
      </c>
      <c r="P5" s="8" t="s">
        <v>17</v>
      </c>
    </row>
    <row r="6" spans="2:16" ht="15" customHeight="true">
      <c r="B6" s="6" t="s">
        <v>22</v>
      </c>
      <c r="C6" s="7" t="s">
        <v>16</v>
      </c>
      <c r="D6" s="8" t="s">
        <v>17</v>
      </c>
      <c r="E6" s="8" t="s">
        <v>18</v>
      </c>
      <c r="F6" s="8" t="s">
        <v>17</v>
      </c>
      <c r="G6" s="8" t="s">
        <v>17</v>
      </c>
      <c r="H6" s="9">
        <v>19.3738433197644</v>
      </c>
      <c r="I6" s="9">
        <v>19.3738433197644</v>
      </c>
      <c r="J6" s="10">
        <v>0</v>
      </c>
      <c r="K6" s="11" />
      <c r="L6" s="10" />
      <c r="M6" s="11" />
      <c r="N6" s="11">
        <v>0</v>
      </c>
      <c r="O6" s="12">
        <v>63</v>
      </c>
      <c r="P6" s="8" t="s">
        <v>17</v>
      </c>
    </row>
    <row r="7" spans="2:16" ht="15" customHeight="true">
      <c r="B7" s="6" t="s">
        <v>23</v>
      </c>
      <c r="C7" s="7" t="s">
        <v>16</v>
      </c>
      <c r="D7" s="8" t="s">
        <v>17</v>
      </c>
      <c r="E7" s="8" t="s">
        <v>18</v>
      </c>
      <c r="F7" s="8" t="s">
        <v>17</v>
      </c>
      <c r="G7" s="8" t="s">
        <v>17</v>
      </c>
      <c r="H7" s="9">
        <v>19.190091473478</v>
      </c>
      <c r="I7" s="9">
        <v>19.190091473478</v>
      </c>
      <c r="J7" s="10">
        <v>0</v>
      </c>
      <c r="K7" s="11" />
      <c r="L7" s="10" />
      <c r="M7" s="11" />
      <c r="N7" s="11">
        <v>0</v>
      </c>
      <c r="O7" s="12">
        <v>63</v>
      </c>
      <c r="P7" s="8" t="s">
        <v>17</v>
      </c>
    </row>
    <row r="8" spans="2:16" ht="15" customHeight="true">
      <c r="B8" s="6" t="s">
        <v>24</v>
      </c>
      <c r="C8" s="7" t="s">
        <v>16</v>
      </c>
      <c r="D8" s="8" t="s">
        <v>17</v>
      </c>
      <c r="E8" s="8" t="s">
        <v>18</v>
      </c>
      <c r="F8" s="8" t="s">
        <v>17</v>
      </c>
      <c r="G8" s="8" t="s">
        <v>17</v>
      </c>
      <c r="H8" s="9">
        <v>19.1054005267541</v>
      </c>
      <c r="I8" s="9">
        <v>19.1054005267541</v>
      </c>
      <c r="J8" s="10">
        <v>0</v>
      </c>
      <c r="K8" s="11" />
      <c r="L8" s="10" />
      <c r="M8" s="11" />
      <c r="N8" s="11">
        <v>0</v>
      </c>
      <c r="O8" s="12">
        <v>63</v>
      </c>
      <c r="P8" s="8" t="s">
        <v>17</v>
      </c>
    </row>
    <row r="9" spans="2:16" ht="15" customHeight="true">
      <c r="B9" s="6" t="s">
        <v>25</v>
      </c>
      <c r="C9" s="7" t="s">
        <v>16</v>
      </c>
      <c r="D9" s="8" t="s">
        <v>17</v>
      </c>
      <c r="E9" s="8" t="s">
        <v>18</v>
      </c>
      <c r="F9" s="8" t="s">
        <v>17</v>
      </c>
      <c r="G9" s="8" t="s">
        <v>17</v>
      </c>
      <c r="H9" s="9">
        <v>17.5449721330671</v>
      </c>
      <c r="I9" s="9">
        <v>17.5449721330671</v>
      </c>
      <c r="J9" s="10">
        <v>0</v>
      </c>
      <c r="K9" s="11" />
      <c r="L9" s="10" />
      <c r="M9" s="11" />
      <c r="N9" s="11">
        <v>0</v>
      </c>
      <c r="O9" s="12">
        <v>63</v>
      </c>
      <c r="P9" s="8" t="s">
        <v>17</v>
      </c>
    </row>
    <row r="10" spans="2:16" ht="15" customHeight="true">
      <c r="B10" s="6" t="s">
        <v>26</v>
      </c>
      <c r="C10" s="7" t="s">
        <v>16</v>
      </c>
      <c r="D10" s="8" t="s">
        <v>17</v>
      </c>
      <c r="E10" s="8" t="s">
        <v>18</v>
      </c>
      <c r="F10" s="8" t="s">
        <v>17</v>
      </c>
      <c r="G10" s="8" t="s">
        <v>17</v>
      </c>
      <c r="H10" s="9">
        <v>17.7054414097936</v>
      </c>
      <c r="I10" s="9">
        <v>17.7054414097936</v>
      </c>
      <c r="J10" s="10">
        <v>0</v>
      </c>
      <c r="K10" s="11" />
      <c r="L10" s="10" />
      <c r="M10" s="11" />
      <c r="N10" s="11">
        <v>0</v>
      </c>
      <c r="O10" s="12">
        <v>63</v>
      </c>
      <c r="P10" s="8" t="s">
        <v>17</v>
      </c>
    </row>
    <row r="11" spans="2:16" ht="15" customHeight="true">
      <c r="B11" s="6" t="s">
        <v>27</v>
      </c>
      <c r="C11" s="7" t="s">
        <v>16</v>
      </c>
      <c r="D11" s="8" t="s">
        <v>17</v>
      </c>
      <c r="E11" s="8" t="s">
        <v>18</v>
      </c>
      <c r="F11" s="8" t="s">
        <v>17</v>
      </c>
      <c r="G11" s="8" t="s">
        <v>17</v>
      </c>
      <c r="H11" s="9" />
      <c r="I11" s="9">
        <v>0</v>
      </c>
      <c r="J11" s="10">
        <v>0</v>
      </c>
      <c r="K11" s="11" />
      <c r="L11" s="10" />
      <c r="M11" s="11">
        <v>0</v>
      </c>
      <c r="N11" s="11">
        <v>0</v>
      </c>
      <c r="O11" s="12">
        <v>63</v>
      </c>
      <c r="P11" s="8" t="s">
        <v>17</v>
      </c>
    </row>
    <row r="12" spans="2:16" ht="15" customHeight="true">
      <c r="B12" s="6" t="s">
        <v>28</v>
      </c>
      <c r="C12" s="7" t="s">
        <v>16</v>
      </c>
      <c r="D12" s="8" t="s">
        <v>17</v>
      </c>
      <c r="E12" s="8" t="s">
        <v>18</v>
      </c>
      <c r="F12" s="8" t="s">
        <v>17</v>
      </c>
      <c r="G12" s="8" t="s">
        <v>17</v>
      </c>
      <c r="H12" s="9" />
      <c r="I12" s="9">
        <v>0</v>
      </c>
      <c r="J12" s="10">
        <v>0</v>
      </c>
      <c r="K12" s="11" />
      <c r="L12" s="10" />
      <c r="M12" s="11">
        <v>0</v>
      </c>
      <c r="N12" s="11">
        <v>0</v>
      </c>
      <c r="O12" s="12">
        <v>63</v>
      </c>
      <c r="P12" s="8" t="s">
        <v>17</v>
      </c>
    </row>
    <row r="13" spans="2:16" ht="15" customHeight="true">
      <c r="B13" s="6" t="s">
        <v>29</v>
      </c>
      <c r="C13" s="7" t="s">
        <v>16</v>
      </c>
      <c r="D13" s="8" t="s">
        <v>17</v>
      </c>
      <c r="E13" s="8" t="s">
        <v>18</v>
      </c>
      <c r="F13" s="8" t="s">
        <v>17</v>
      </c>
      <c r="G13" s="8" t="s">
        <v>17</v>
      </c>
      <c r="H13" s="9" />
      <c r="I13" s="9">
        <v>0</v>
      </c>
      <c r="J13" s="10">
        <v>0</v>
      </c>
      <c r="K13" s="11" />
      <c r="L13" s="10" />
      <c r="M13" s="11">
        <v>0</v>
      </c>
      <c r="N13" s="11">
        <v>0</v>
      </c>
      <c r="O13" s="12">
        <v>63</v>
      </c>
      <c r="P13" s="8" t="s">
        <v>17</v>
      </c>
    </row>
    <row r="14" spans="2:16" ht="15" customHeight="true">
      <c r="B14" s="6" t="s">
        <v>30</v>
      </c>
      <c r="C14" s="7" t="s">
        <v>16</v>
      </c>
      <c r="D14" s="8" t="s">
        <v>17</v>
      </c>
      <c r="E14" s="8" t="s">
        <v>18</v>
      </c>
      <c r="F14" s="8" t="s">
        <v>17</v>
      </c>
      <c r="G14" s="8" t="s">
        <v>17</v>
      </c>
      <c r="H14" s="9">
        <v>17.1447479962478</v>
      </c>
      <c r="I14" s="9">
        <v>17.1447479962478</v>
      </c>
      <c r="J14" s="10">
        <v>0</v>
      </c>
      <c r="K14" s="11" />
      <c r="L14" s="10" />
      <c r="M14" s="11" />
      <c r="N14" s="11">
        <v>0</v>
      </c>
      <c r="O14" s="12">
        <v>63</v>
      </c>
      <c r="P14" s="8" t="s">
        <v>17</v>
      </c>
    </row>
    <row r="15" spans="2:16" ht="15" customHeight="true">
      <c r="B15" s="6" t="s">
        <v>31</v>
      </c>
      <c r="C15" s="7" t="s">
        <v>16</v>
      </c>
      <c r="D15" s="8" t="s">
        <v>17</v>
      </c>
      <c r="E15" s="8" t="s">
        <v>18</v>
      </c>
      <c r="F15" s="8" t="s">
        <v>17</v>
      </c>
      <c r="G15" s="8" t="s">
        <v>17</v>
      </c>
      <c r="H15" s="9">
        <v>16.957715026512</v>
      </c>
      <c r="I15" s="9">
        <v>16.957715026512</v>
      </c>
      <c r="J15" s="10">
        <v>0</v>
      </c>
      <c r="K15" s="11" />
      <c r="L15" s="10" />
      <c r="M15" s="11" />
      <c r="N15" s="11">
        <v>0</v>
      </c>
      <c r="O15" s="12">
        <v>63</v>
      </c>
      <c r="P15" s="8" t="s">
        <v>17</v>
      </c>
    </row>
    <row r="16" spans="2:16" ht="15" customHeight="true">
      <c r="B16" s="6" t="s">
        <v>32</v>
      </c>
      <c r="C16" s="7" t="s">
        <v>16</v>
      </c>
      <c r="D16" s="8" t="s">
        <v>17</v>
      </c>
      <c r="E16" s="8" t="s">
        <v>18</v>
      </c>
      <c r="F16" s="8" t="s">
        <v>17</v>
      </c>
      <c r="G16" s="8" t="s">
        <v>17</v>
      </c>
      <c r="H16" s="9">
        <v>18.311903558936</v>
      </c>
      <c r="I16" s="9">
        <v>18.311903558936</v>
      </c>
      <c r="J16" s="10">
        <v>0</v>
      </c>
      <c r="K16" s="11" />
      <c r="L16" s="10" />
      <c r="M16" s="11" />
      <c r="N16" s="11">
        <v>0</v>
      </c>
      <c r="O16" s="12">
        <v>63</v>
      </c>
      <c r="P16" s="8" t="s">
        <v>17</v>
      </c>
    </row>
    <row r="17" spans="2:16" ht="15" customHeight="true">
      <c r="B17" s="6" t="s">
        <v>33</v>
      </c>
      <c r="C17" s="7" t="s">
        <v>16</v>
      </c>
      <c r="D17" s="8" t="s">
        <v>17</v>
      </c>
      <c r="E17" s="8" t="s">
        <v>18</v>
      </c>
      <c r="F17" s="8" t="s">
        <v>17</v>
      </c>
      <c r="G17" s="8" t="s">
        <v>17</v>
      </c>
      <c r="H17" s="9">
        <v>19.3867959719868</v>
      </c>
      <c r="I17" s="9">
        <v>19.3867959719868</v>
      </c>
      <c r="J17" s="10">
        <v>0</v>
      </c>
      <c r="K17" s="11" />
      <c r="L17" s="10" />
      <c r="M17" s="11" />
      <c r="N17" s="11">
        <v>0</v>
      </c>
      <c r="O17" s="12">
        <v>63</v>
      </c>
      <c r="P17" s="8" t="s">
        <v>17</v>
      </c>
    </row>
    <row r="18" spans="2:16" ht="15" customHeight="true">
      <c r="B18" s="6" t="s">
        <v>34</v>
      </c>
      <c r="C18" s="7" t="s">
        <v>16</v>
      </c>
      <c r="D18" s="8" t="s">
        <v>17</v>
      </c>
      <c r="E18" s="8" t="s">
        <v>18</v>
      </c>
      <c r="F18" s="8" t="s">
        <v>17</v>
      </c>
      <c r="G18" s="8" t="s">
        <v>17</v>
      </c>
      <c r="H18" s="9">
        <v>19.3817682285896</v>
      </c>
      <c r="I18" s="9">
        <v>19.3817682285896</v>
      </c>
      <c r="J18" s="10">
        <v>0</v>
      </c>
      <c r="K18" s="11" />
      <c r="L18" s="10" />
      <c r="M18" s="11" />
      <c r="N18" s="11">
        <v>0</v>
      </c>
      <c r="O18" s="12">
        <v>63</v>
      </c>
      <c r="P18" s="8" t="s">
        <v>17</v>
      </c>
    </row>
    <row r="19" spans="2:16" ht="15" customHeight="true">
      <c r="B19" s="6" t="s">
        <v>35</v>
      </c>
      <c r="C19" s="7" t="s">
        <v>16</v>
      </c>
      <c r="D19" s="8" t="s">
        <v>17</v>
      </c>
      <c r="E19" s="8" t="s">
        <v>18</v>
      </c>
      <c r="F19" s="8" t="s">
        <v>17</v>
      </c>
      <c r="G19" s="8" t="s">
        <v>17</v>
      </c>
      <c r="H19" s="9">
        <v>19.1723963063282</v>
      </c>
      <c r="I19" s="9">
        <v>19.1723963063282</v>
      </c>
      <c r="J19" s="10">
        <v>0</v>
      </c>
      <c r="K19" s="11" />
      <c r="L19" s="10" />
      <c r="M19" s="11" />
      <c r="N19" s="11">
        <v>0</v>
      </c>
      <c r="O19" s="12">
        <v>63</v>
      </c>
      <c r="P19" s="8" t="s">
        <v>17</v>
      </c>
    </row>
    <row r="20" spans="2:16" ht="15" customHeight="true">
      <c r="B20" s="6" t="s">
        <v>36</v>
      </c>
      <c r="C20" s="7" t="s">
        <v>16</v>
      </c>
      <c r="D20" s="8" t="s">
        <v>17</v>
      </c>
      <c r="E20" s="8" t="s">
        <v>18</v>
      </c>
      <c r="F20" s="8" t="s">
        <v>17</v>
      </c>
      <c r="G20" s="8" t="s">
        <v>17</v>
      </c>
      <c r="H20" s="9">
        <v>19.3537063018081</v>
      </c>
      <c r="I20" s="9">
        <v>19.3537063018081</v>
      </c>
      <c r="J20" s="10">
        <v>0</v>
      </c>
      <c r="K20" s="11" />
      <c r="L20" s="10" />
      <c r="M20" s="11" />
      <c r="N20" s="11">
        <v>0</v>
      </c>
      <c r="O20" s="12">
        <v>63</v>
      </c>
      <c r="P20" s="8" t="s">
        <v>17</v>
      </c>
    </row>
    <row r="21" spans="2:16" ht="15" customHeight="true">
      <c r="B21" s="6" t="s">
        <v>37</v>
      </c>
      <c r="C21" s="7" t="s">
        <v>16</v>
      </c>
      <c r="D21" s="8" t="s">
        <v>17</v>
      </c>
      <c r="E21" s="8" t="s">
        <v>18</v>
      </c>
      <c r="F21" s="8" t="s">
        <v>17</v>
      </c>
      <c r="G21" s="8" t="s">
        <v>17</v>
      </c>
      <c r="H21" s="9">
        <v>17.6952928864104</v>
      </c>
      <c r="I21" s="9">
        <v>17.6952928864104</v>
      </c>
      <c r="J21" s="10">
        <v>0</v>
      </c>
      <c r="K21" s="11" />
      <c r="L21" s="10" />
      <c r="M21" s="11" />
      <c r="N21" s="11">
        <v>0</v>
      </c>
      <c r="O21" s="12">
        <v>63</v>
      </c>
      <c r="P21" s="8" t="s">
        <v>17</v>
      </c>
    </row>
    <row r="22" spans="2:16" ht="15" customHeight="true">
      <c r="B22" s="6" t="s">
        <v>38</v>
      </c>
      <c r="C22" s="7" t="s">
        <v>16</v>
      </c>
      <c r="D22" s="8" t="s">
        <v>17</v>
      </c>
      <c r="E22" s="8" t="s">
        <v>18</v>
      </c>
      <c r="F22" s="8" t="s">
        <v>17</v>
      </c>
      <c r="G22" s="8" t="s">
        <v>17</v>
      </c>
      <c r="H22" s="9">
        <v>18.0357793826475</v>
      </c>
      <c r="I22" s="9">
        <v>18.0357793826475</v>
      </c>
      <c r="J22" s="10">
        <v>0</v>
      </c>
      <c r="K22" s="11" />
      <c r="L22" s="10" />
      <c r="M22" s="11" />
      <c r="N22" s="11">
        <v>0</v>
      </c>
      <c r="O22" s="12">
        <v>63</v>
      </c>
      <c r="P22" s="8" t="s">
        <v>17</v>
      </c>
    </row>
    <row r="23" spans="2:16" ht="15" customHeight="true">
      <c r="B23" s="6" t="s">
        <v>39</v>
      </c>
      <c r="C23" s="7" t="s">
        <v>16</v>
      </c>
      <c r="D23" s="8" t="s">
        <v>17</v>
      </c>
      <c r="E23" s="8" t="s">
        <v>18</v>
      </c>
      <c r="F23" s="8" t="s">
        <v>17</v>
      </c>
      <c r="G23" s="8" t="s">
        <v>17</v>
      </c>
      <c r="H23" s="9" />
      <c r="I23" s="9">
        <v>0</v>
      </c>
      <c r="J23" s="10">
        <v>0</v>
      </c>
      <c r="K23" s="11" />
      <c r="L23" s="10" />
      <c r="M23" s="11">
        <v>0</v>
      </c>
      <c r="N23" s="11">
        <v>0</v>
      </c>
      <c r="O23" s="12">
        <v>63</v>
      </c>
      <c r="P23" s="8" t="s">
        <v>17</v>
      </c>
    </row>
    <row r="24" spans="2:16" ht="15" customHeight="true">
      <c r="B24" s="6" t="s">
        <v>40</v>
      </c>
      <c r="C24" s="7" t="s">
        <v>16</v>
      </c>
      <c r="D24" s="8" t="s">
        <v>17</v>
      </c>
      <c r="E24" s="8" t="s">
        <v>18</v>
      </c>
      <c r="F24" s="8" t="s">
        <v>17</v>
      </c>
      <c r="G24" s="8" t="s">
        <v>17</v>
      </c>
      <c r="H24" s="9" />
      <c r="I24" s="9">
        <v>0</v>
      </c>
      <c r="J24" s="10">
        <v>0</v>
      </c>
      <c r="K24" s="11" />
      <c r="L24" s="10" />
      <c r="M24" s="11">
        <v>0</v>
      </c>
      <c r="N24" s="11">
        <v>0</v>
      </c>
      <c r="O24" s="12">
        <v>63</v>
      </c>
      <c r="P24" s="8" t="s">
        <v>17</v>
      </c>
    </row>
    <row r="25" spans="2:16" ht="15" customHeight="true">
      <c r="B25" s="6" t="s">
        <v>41</v>
      </c>
      <c r="C25" s="7" t="s">
        <v>16</v>
      </c>
      <c r="D25" s="8" t="s">
        <v>17</v>
      </c>
      <c r="E25" s="8" t="s">
        <v>18</v>
      </c>
      <c r="F25" s="8" t="s">
        <v>17</v>
      </c>
      <c r="G25" s="8" t="s">
        <v>17</v>
      </c>
      <c r="H25" s="9" />
      <c r="I25" s="9">
        <v>0</v>
      </c>
      <c r="J25" s="10">
        <v>0</v>
      </c>
      <c r="K25" s="11" />
      <c r="L25" s="10" />
      <c r="M25" s="11">
        <v>0</v>
      </c>
      <c r="N25" s="11">
        <v>0</v>
      </c>
      <c r="O25" s="12">
        <v>63</v>
      </c>
      <c r="P25" s="8" t="s">
        <v>17</v>
      </c>
    </row>
    <row r="26" spans="2:16" ht="15" customHeight="true">
      <c r="B26" s="6" t="s">
        <v>42</v>
      </c>
      <c r="C26" s="7" t="s">
        <v>16</v>
      </c>
      <c r="D26" s="8" t="s">
        <v>17</v>
      </c>
      <c r="E26" s="8" t="s">
        <v>18</v>
      </c>
      <c r="F26" s="8" t="s">
        <v>17</v>
      </c>
      <c r="G26" s="8" t="s">
        <v>17</v>
      </c>
      <c r="H26" s="9">
        <v>16.8329739234254</v>
      </c>
      <c r="I26" s="9">
        <v>16.8329739234254</v>
      </c>
      <c r="J26" s="10">
        <v>0</v>
      </c>
      <c r="K26" s="11" />
      <c r="L26" s="10" />
      <c r="M26" s="11" />
      <c r="N26" s="11">
        <v>0</v>
      </c>
      <c r="O26" s="12">
        <v>63</v>
      </c>
      <c r="P26" s="8" t="s">
        <v>17</v>
      </c>
    </row>
    <row r="27" spans="2:16" ht="15" customHeight="true">
      <c r="B27" s="6" t="s">
        <v>43</v>
      </c>
      <c r="C27" s="7" t="s">
        <v>16</v>
      </c>
      <c r="D27" s="8" t="s">
        <v>17</v>
      </c>
      <c r="E27" s="8" t="s">
        <v>18</v>
      </c>
      <c r="F27" s="8" t="s">
        <v>17</v>
      </c>
      <c r="G27" s="8" t="s">
        <v>17</v>
      </c>
      <c r="H27" s="9">
        <v>16.641041913361</v>
      </c>
      <c r="I27" s="9">
        <v>16.641041913361</v>
      </c>
      <c r="J27" s="10">
        <v>0</v>
      </c>
      <c r="K27" s="11" />
      <c r="L27" s="10" />
      <c r="M27" s="11" />
      <c r="N27" s="11">
        <v>0</v>
      </c>
      <c r="O27" s="12">
        <v>63</v>
      </c>
      <c r="P27" s="8" t="s">
        <v>17</v>
      </c>
    </row>
    <row r="28" spans="2:16" ht="15" customHeight="true">
      <c r="B28" s="6" t="s">
        <v>44</v>
      </c>
      <c r="C28" s="7" t="s">
        <v>16</v>
      </c>
      <c r="D28" s="8" t="s">
        <v>17</v>
      </c>
      <c r="E28" s="8" t="s">
        <v>18</v>
      </c>
      <c r="F28" s="8" t="s">
        <v>17</v>
      </c>
      <c r="G28" s="8" t="s">
        <v>17</v>
      </c>
      <c r="H28" s="9">
        <v>18.1446271304979</v>
      </c>
      <c r="I28" s="9">
        <v>18.1446271304979</v>
      </c>
      <c r="J28" s="10">
        <v>0</v>
      </c>
      <c r="K28" s="11" />
      <c r="L28" s="10" />
      <c r="M28" s="11" />
      <c r="N28" s="11">
        <v>0</v>
      </c>
      <c r="O28" s="12">
        <v>63</v>
      </c>
      <c r="P28" s="8" t="s">
        <v>17</v>
      </c>
    </row>
    <row r="29" spans="2:16" ht="15" customHeight="true">
      <c r="B29" s="6" t="s">
        <v>45</v>
      </c>
      <c r="C29" s="7" t="s">
        <v>16</v>
      </c>
      <c r="D29" s="8" t="s">
        <v>17</v>
      </c>
      <c r="E29" s="8" t="s">
        <v>18</v>
      </c>
      <c r="F29" s="8" t="s">
        <v>17</v>
      </c>
      <c r="G29" s="8" t="s">
        <v>17</v>
      </c>
      <c r="H29" s="9">
        <v>19.0538029098141</v>
      </c>
      <c r="I29" s="9">
        <v>19.0538029098141</v>
      </c>
      <c r="J29" s="10">
        <v>0</v>
      </c>
      <c r="K29" s="11" />
      <c r="L29" s="10" />
      <c r="M29" s="11" />
      <c r="N29" s="11">
        <v>0</v>
      </c>
      <c r="O29" s="12">
        <v>63</v>
      </c>
      <c r="P29" s="8" t="s">
        <v>17</v>
      </c>
    </row>
    <row r="30" spans="2:16" ht="15" customHeight="true">
      <c r="B30" s="6" t="s">
        <v>46</v>
      </c>
      <c r="C30" s="7" t="s">
        <v>16</v>
      </c>
      <c r="D30" s="8" t="s">
        <v>17</v>
      </c>
      <c r="E30" s="8" t="s">
        <v>18</v>
      </c>
      <c r="F30" s="8" t="s">
        <v>17</v>
      </c>
      <c r="G30" s="8" t="s">
        <v>17</v>
      </c>
      <c r="H30" s="9">
        <v>19.0602158756709</v>
      </c>
      <c r="I30" s="9">
        <v>19.0602158756709</v>
      </c>
      <c r="J30" s="10">
        <v>0</v>
      </c>
      <c r="K30" s="11" />
      <c r="L30" s="10" />
      <c r="M30" s="11" />
      <c r="N30" s="11">
        <v>0</v>
      </c>
      <c r="O30" s="12">
        <v>63</v>
      </c>
      <c r="P30" s="8" t="s">
        <v>17</v>
      </c>
    </row>
    <row r="31" spans="2:16" ht="15" customHeight="true">
      <c r="B31" s="6" t="s">
        <v>47</v>
      </c>
      <c r="C31" s="7" t="s">
        <v>16</v>
      </c>
      <c r="D31" s="8" t="s">
        <v>17</v>
      </c>
      <c r="E31" s="8" t="s">
        <v>18</v>
      </c>
      <c r="F31" s="8" t="s">
        <v>17</v>
      </c>
      <c r="G31" s="8" t="s">
        <v>17</v>
      </c>
      <c r="H31" s="9">
        <v>19.0030307694436</v>
      </c>
      <c r="I31" s="9">
        <v>19.0030307694436</v>
      </c>
      <c r="J31" s="10">
        <v>0</v>
      </c>
      <c r="K31" s="11" />
      <c r="L31" s="10" />
      <c r="M31" s="11" />
      <c r="N31" s="11">
        <v>0</v>
      </c>
      <c r="O31" s="12">
        <v>63</v>
      </c>
      <c r="P31" s="8" t="s">
        <v>17</v>
      </c>
    </row>
    <row r="32" spans="2:16" ht="15" customHeight="true">
      <c r="B32" s="6" t="s">
        <v>48</v>
      </c>
      <c r="C32" s="7" t="s">
        <v>16</v>
      </c>
      <c r="D32" s="8" t="s">
        <v>17</v>
      </c>
      <c r="E32" s="8" t="s">
        <v>18</v>
      </c>
      <c r="F32" s="8" t="s">
        <v>17</v>
      </c>
      <c r="G32" s="8" t="s">
        <v>17</v>
      </c>
      <c r="H32" s="9">
        <v>19.0704092167291</v>
      </c>
      <c r="I32" s="9">
        <v>19.0704092167291</v>
      </c>
      <c r="J32" s="10">
        <v>0</v>
      </c>
      <c r="K32" s="11" />
      <c r="L32" s="10" />
      <c r="M32" s="11" />
      <c r="N32" s="11">
        <v>0</v>
      </c>
      <c r="O32" s="12">
        <v>63</v>
      </c>
      <c r="P32" s="8" t="s">
        <v>17</v>
      </c>
    </row>
    <row r="33" spans="2:16" ht="15" customHeight="true">
      <c r="B33" s="6" t="s">
        <v>49</v>
      </c>
      <c r="C33" s="7" t="s">
        <v>16</v>
      </c>
      <c r="D33" s="8" t="s">
        <v>17</v>
      </c>
      <c r="E33" s="8" t="s">
        <v>18</v>
      </c>
      <c r="F33" s="8" t="s">
        <v>17</v>
      </c>
      <c r="G33" s="8" t="s">
        <v>17</v>
      </c>
      <c r="H33" s="9">
        <v>17.4332083652326</v>
      </c>
      <c r="I33" s="9">
        <v>17.4332083652326</v>
      </c>
      <c r="J33" s="10">
        <v>0</v>
      </c>
      <c r="K33" s="11" />
      <c r="L33" s="10" />
      <c r="M33" s="11" />
      <c r="N33" s="11">
        <v>0</v>
      </c>
      <c r="O33" s="12">
        <v>63</v>
      </c>
      <c r="P33" s="8" t="s">
        <v>17</v>
      </c>
    </row>
    <row r="34" spans="2:16" ht="15" customHeight="true">
      <c r="B34" s="6" t="s">
        <v>50</v>
      </c>
      <c r="C34" s="7" t="s">
        <v>16</v>
      </c>
      <c r="D34" s="8" t="s">
        <v>17</v>
      </c>
      <c r="E34" s="8" t="s">
        <v>18</v>
      </c>
      <c r="F34" s="8" t="s">
        <v>17</v>
      </c>
      <c r="G34" s="8" t="s">
        <v>17</v>
      </c>
      <c r="H34" s="9">
        <v>17.8572434076515</v>
      </c>
      <c r="I34" s="9">
        <v>17.8572434076515</v>
      </c>
      <c r="J34" s="10">
        <v>0</v>
      </c>
      <c r="K34" s="11" />
      <c r="L34" s="10" />
      <c r="M34" s="11" />
      <c r="N34" s="11">
        <v>0</v>
      </c>
      <c r="O34" s="12">
        <v>63</v>
      </c>
      <c r="P34" s="8" t="s">
        <v>17</v>
      </c>
    </row>
    <row r="35" spans="2:16" ht="15" customHeight="true">
      <c r="B35" s="6" t="s">
        <v>51</v>
      </c>
      <c r="C35" s="7" t="s">
        <v>16</v>
      </c>
      <c r="D35" s="8" t="s">
        <v>17</v>
      </c>
      <c r="E35" s="8" t="s">
        <v>18</v>
      </c>
      <c r="F35" s="8" t="s">
        <v>17</v>
      </c>
      <c r="G35" s="8" t="s">
        <v>17</v>
      </c>
      <c r="H35" s="9" />
      <c r="I35" s="9">
        <v>0</v>
      </c>
      <c r="J35" s="10">
        <v>0</v>
      </c>
      <c r="K35" s="11" />
      <c r="L35" s="10" />
      <c r="M35" s="11">
        <v>0</v>
      </c>
      <c r="N35" s="11">
        <v>0</v>
      </c>
      <c r="O35" s="12">
        <v>63</v>
      </c>
      <c r="P35" s="8" t="s">
        <v>17</v>
      </c>
    </row>
    <row r="36" spans="2:16" ht="15" customHeight="true">
      <c r="B36" s="6" t="s">
        <v>52</v>
      </c>
      <c r="C36" s="7" t="s">
        <v>16</v>
      </c>
      <c r="D36" s="8" t="s">
        <v>17</v>
      </c>
      <c r="E36" s="8" t="s">
        <v>18</v>
      </c>
      <c r="F36" s="8" t="s">
        <v>17</v>
      </c>
      <c r="G36" s="8" t="s">
        <v>17</v>
      </c>
      <c r="H36" s="9" />
      <c r="I36" s="9">
        <v>0</v>
      </c>
      <c r="J36" s="10">
        <v>0</v>
      </c>
      <c r="K36" s="11" />
      <c r="L36" s="10" />
      <c r="M36" s="11">
        <v>0</v>
      </c>
      <c r="N36" s="11">
        <v>0</v>
      </c>
      <c r="O36" s="12">
        <v>63</v>
      </c>
      <c r="P36" s="8" t="s">
        <v>17</v>
      </c>
    </row>
    <row r="37" spans="2:16" ht="15" customHeight="true">
      <c r="B37" s="6" t="s">
        <v>53</v>
      </c>
      <c r="C37" s="7" t="s">
        <v>16</v>
      </c>
      <c r="D37" s="8" t="s">
        <v>17</v>
      </c>
      <c r="E37" s="8" t="s">
        <v>18</v>
      </c>
      <c r="F37" s="8" t="s">
        <v>17</v>
      </c>
      <c r="G37" s="8" t="s">
        <v>17</v>
      </c>
      <c r="H37" s="9" />
      <c r="I37" s="9">
        <v>0</v>
      </c>
      <c r="J37" s="10">
        <v>0</v>
      </c>
      <c r="K37" s="11" />
      <c r="L37" s="10" />
      <c r="M37" s="11">
        <v>0</v>
      </c>
      <c r="N37" s="11">
        <v>0</v>
      </c>
      <c r="O37" s="12">
        <v>63</v>
      </c>
      <c r="P37" s="8" t="s">
        <v>17</v>
      </c>
    </row>
    <row r="38" spans="2:16" ht="15" customHeight="true">
      <c r="B38" s="6" t="s">
        <v>54</v>
      </c>
      <c r="C38" s="7" t="s">
        <v>16</v>
      </c>
      <c r="D38" s="8" t="s">
        <v>17</v>
      </c>
      <c r="E38" s="8" t="s">
        <v>18</v>
      </c>
      <c r="F38" s="8" t="s">
        <v>17</v>
      </c>
      <c r="G38" s="8" t="s">
        <v>17</v>
      </c>
      <c r="H38" s="9">
        <v>17.1111082719867</v>
      </c>
      <c r="I38" s="9">
        <v>17.1111082719867</v>
      </c>
      <c r="J38" s="10">
        <v>0</v>
      </c>
      <c r="K38" s="11" />
      <c r="L38" s="10" />
      <c r="M38" s="11" />
      <c r="N38" s="11">
        <v>0</v>
      </c>
      <c r="O38" s="12">
        <v>63</v>
      </c>
      <c r="P38" s="8" t="s">
        <v>17</v>
      </c>
    </row>
    <row r="39" spans="2:16" ht="15" customHeight="true">
      <c r="B39" s="6" t="s">
        <v>55</v>
      </c>
      <c r="C39" s="7" t="s">
        <v>16</v>
      </c>
      <c r="D39" s="8" t="s">
        <v>17</v>
      </c>
      <c r="E39" s="8" t="s">
        <v>18</v>
      </c>
      <c r="F39" s="8" t="s">
        <v>17</v>
      </c>
      <c r="G39" s="8" t="s">
        <v>17</v>
      </c>
      <c r="H39" s="9">
        <v>16.7955537865263</v>
      </c>
      <c r="I39" s="9">
        <v>16.7955537865263</v>
      </c>
      <c r="J39" s="10">
        <v>0</v>
      </c>
      <c r="K39" s="11" />
      <c r="L39" s="10" />
      <c r="M39" s="11" />
      <c r="N39" s="11">
        <v>0</v>
      </c>
      <c r="O39" s="12">
        <v>63</v>
      </c>
      <c r="P39" s="8" t="s">
        <v>17</v>
      </c>
    </row>
    <row r="40" spans="2:16" ht="15" customHeight="true">
      <c r="B40" s="6" t="s">
        <v>56</v>
      </c>
      <c r="C40" s="7" t="s">
        <v>16</v>
      </c>
      <c r="D40" s="8" t="s">
        <v>17</v>
      </c>
      <c r="E40" s="8" t="s">
        <v>18</v>
      </c>
      <c r="F40" s="8" t="s">
        <v>17</v>
      </c>
      <c r="G40" s="8" t="s">
        <v>17</v>
      </c>
      <c r="H40" s="9">
        <v>18.0723312210905</v>
      </c>
      <c r="I40" s="9">
        <v>18.0723312210905</v>
      </c>
      <c r="J40" s="10">
        <v>0</v>
      </c>
      <c r="K40" s="11" />
      <c r="L40" s="10" />
      <c r="M40" s="11" />
      <c r="N40" s="11">
        <v>0</v>
      </c>
      <c r="O40" s="12">
        <v>63</v>
      </c>
      <c r="P40" s="8" t="s">
        <v>17</v>
      </c>
    </row>
    <row r="41" spans="2:16" ht="15" customHeight="true">
      <c r="B41" s="6" t="s">
        <v>57</v>
      </c>
      <c r="C41" s="7" t="s">
        <v>16</v>
      </c>
      <c r="D41" s="8" t="s">
        <v>17</v>
      </c>
      <c r="E41" s="8" t="s">
        <v>18</v>
      </c>
      <c r="F41" s="8" t="s">
        <v>17</v>
      </c>
      <c r="G41" s="8" t="s">
        <v>17</v>
      </c>
      <c r="H41" s="9">
        <v>19.1422377306343</v>
      </c>
      <c r="I41" s="9">
        <v>19.1422377306343</v>
      </c>
      <c r="J41" s="10">
        <v>0</v>
      </c>
      <c r="K41" s="11" />
      <c r="L41" s="10" />
      <c r="M41" s="11" />
      <c r="N41" s="11">
        <v>0</v>
      </c>
      <c r="O41" s="12">
        <v>63</v>
      </c>
      <c r="P41" s="8" t="s">
        <v>17</v>
      </c>
    </row>
    <row r="42" spans="2:16" ht="15" customHeight="true">
      <c r="B42" s="6" t="s">
        <v>58</v>
      </c>
      <c r="C42" s="7" t="s">
        <v>16</v>
      </c>
      <c r="D42" s="8" t="s">
        <v>17</v>
      </c>
      <c r="E42" s="8" t="s">
        <v>18</v>
      </c>
      <c r="F42" s="8" t="s">
        <v>17</v>
      </c>
      <c r="G42" s="8" t="s">
        <v>17</v>
      </c>
      <c r="H42" s="9">
        <v>19.1658267796684</v>
      </c>
      <c r="I42" s="9">
        <v>19.1658267796684</v>
      </c>
      <c r="J42" s="10">
        <v>0</v>
      </c>
      <c r="K42" s="11" />
      <c r="L42" s="10" />
      <c r="M42" s="11" />
      <c r="N42" s="11">
        <v>0</v>
      </c>
      <c r="O42" s="12">
        <v>63</v>
      </c>
      <c r="P42" s="8" t="s">
        <v>17</v>
      </c>
    </row>
    <row r="43" spans="2:16" ht="15" customHeight="true">
      <c r="B43" s="6" t="s">
        <v>59</v>
      </c>
      <c r="C43" s="7" t="s">
        <v>16</v>
      </c>
      <c r="D43" s="8" t="s">
        <v>17</v>
      </c>
      <c r="E43" s="8" t="s">
        <v>18</v>
      </c>
      <c r="F43" s="8" t="s">
        <v>17</v>
      </c>
      <c r="G43" s="8" t="s">
        <v>17</v>
      </c>
      <c r="H43" s="9">
        <v>19.0156604183959</v>
      </c>
      <c r="I43" s="9">
        <v>19.0156604183959</v>
      </c>
      <c r="J43" s="10">
        <v>0</v>
      </c>
      <c r="K43" s="11" />
      <c r="L43" s="10" />
      <c r="M43" s="11" />
      <c r="N43" s="11">
        <v>0</v>
      </c>
      <c r="O43" s="12">
        <v>63</v>
      </c>
      <c r="P43" s="8" t="s">
        <v>17</v>
      </c>
    </row>
    <row r="44" spans="2:16" ht="15" customHeight="true">
      <c r="B44" s="6" t="s">
        <v>60</v>
      </c>
      <c r="C44" s="7" t="s">
        <v>16</v>
      </c>
      <c r="D44" s="8" t="s">
        <v>17</v>
      </c>
      <c r="E44" s="8" t="s">
        <v>18</v>
      </c>
      <c r="F44" s="8" t="s">
        <v>17</v>
      </c>
      <c r="G44" s="8" t="s">
        <v>17</v>
      </c>
      <c r="H44" s="9">
        <v>19.0663883508168</v>
      </c>
      <c r="I44" s="9">
        <v>19.0663883508168</v>
      </c>
      <c r="J44" s="10">
        <v>0</v>
      </c>
      <c r="K44" s="11" />
      <c r="L44" s="10" />
      <c r="M44" s="11" />
      <c r="N44" s="11">
        <v>0</v>
      </c>
      <c r="O44" s="12">
        <v>63</v>
      </c>
      <c r="P44" s="8" t="s">
        <v>17</v>
      </c>
    </row>
    <row r="45" spans="2:16" ht="15" customHeight="true">
      <c r="B45" s="6" t="s">
        <v>61</v>
      </c>
      <c r="C45" s="7" t="s">
        <v>16</v>
      </c>
      <c r="D45" s="8" t="s">
        <v>17</v>
      </c>
      <c r="E45" s="8" t="s">
        <v>18</v>
      </c>
      <c r="F45" s="8" t="s">
        <v>17</v>
      </c>
      <c r="G45" s="8" t="s">
        <v>17</v>
      </c>
      <c r="H45" s="9">
        <v>17.4375292475485</v>
      </c>
      <c r="I45" s="9">
        <v>17.4375292475485</v>
      </c>
      <c r="J45" s="10">
        <v>0</v>
      </c>
      <c r="K45" s="11" />
      <c r="L45" s="10" />
      <c r="M45" s="11" />
      <c r="N45" s="11">
        <v>0</v>
      </c>
      <c r="O45" s="12">
        <v>63</v>
      </c>
      <c r="P45" s="8" t="s">
        <v>17</v>
      </c>
    </row>
    <row r="46" spans="2:16" ht="15" customHeight="true">
      <c r="B46" s="6" t="s">
        <v>62</v>
      </c>
      <c r="C46" s="7" t="s">
        <v>16</v>
      </c>
      <c r="D46" s="8" t="s">
        <v>17</v>
      </c>
      <c r="E46" s="8" t="s">
        <v>18</v>
      </c>
      <c r="F46" s="8" t="s">
        <v>17</v>
      </c>
      <c r="G46" s="8" t="s">
        <v>17</v>
      </c>
      <c r="H46" s="9">
        <v>17.8736909327614</v>
      </c>
      <c r="I46" s="9">
        <v>17.8736909327614</v>
      </c>
      <c r="J46" s="10">
        <v>0</v>
      </c>
      <c r="K46" s="11" />
      <c r="L46" s="10" />
      <c r="M46" s="11" />
      <c r="N46" s="11">
        <v>0</v>
      </c>
      <c r="O46" s="12">
        <v>63</v>
      </c>
      <c r="P46" s="8" t="s">
        <v>17</v>
      </c>
    </row>
    <row r="47" spans="2:16" ht="15" customHeight="true">
      <c r="B47" s="6" t="s">
        <v>63</v>
      </c>
      <c r="C47" s="7" t="s">
        <v>16</v>
      </c>
      <c r="D47" s="8" t="s">
        <v>17</v>
      </c>
      <c r="E47" s="8" t="s">
        <v>18</v>
      </c>
      <c r="F47" s="8" t="s">
        <v>17</v>
      </c>
      <c r="G47" s="8" t="s">
        <v>17</v>
      </c>
      <c r="H47" s="9" />
      <c r="I47" s="9">
        <v>0</v>
      </c>
      <c r="J47" s="10">
        <v>0</v>
      </c>
      <c r="K47" s="11" />
      <c r="L47" s="10" />
      <c r="M47" s="11">
        <v>0</v>
      </c>
      <c r="N47" s="11">
        <v>0</v>
      </c>
      <c r="O47" s="12">
        <v>63</v>
      </c>
      <c r="P47" s="8" t="s">
        <v>17</v>
      </c>
    </row>
    <row r="48" spans="2:16" ht="15" customHeight="true">
      <c r="B48" s="6" t="s">
        <v>64</v>
      </c>
      <c r="C48" s="7" t="s">
        <v>16</v>
      </c>
      <c r="D48" s="8" t="s">
        <v>17</v>
      </c>
      <c r="E48" s="8" t="s">
        <v>18</v>
      </c>
      <c r="F48" s="8" t="s">
        <v>17</v>
      </c>
      <c r="G48" s="8" t="s">
        <v>17</v>
      </c>
      <c r="H48" s="9" />
      <c r="I48" s="9">
        <v>0</v>
      </c>
      <c r="J48" s="10">
        <v>0</v>
      </c>
      <c r="K48" s="11" />
      <c r="L48" s="10" />
      <c r="M48" s="11">
        <v>0</v>
      </c>
      <c r="N48" s="11">
        <v>0</v>
      </c>
      <c r="O48" s="12">
        <v>63</v>
      </c>
      <c r="P48" s="8" t="s">
        <v>17</v>
      </c>
    </row>
    <row r="49" spans="2:16" ht="15" customHeight="true">
      <c r="B49" s="6" t="s">
        <v>65</v>
      </c>
      <c r="C49" s="7" t="s">
        <v>16</v>
      </c>
      <c r="D49" s="8" t="s">
        <v>17</v>
      </c>
      <c r="E49" s="8" t="s">
        <v>18</v>
      </c>
      <c r="F49" s="8" t="s">
        <v>17</v>
      </c>
      <c r="G49" s="8" t="s">
        <v>17</v>
      </c>
      <c r="H49" s="9" />
      <c r="I49" s="9">
        <v>0</v>
      </c>
      <c r="J49" s="10">
        <v>0</v>
      </c>
      <c r="K49" s="11" />
      <c r="L49" s="10" />
      <c r="M49" s="11">
        <v>0</v>
      </c>
      <c r="N49" s="11">
        <v>0</v>
      </c>
      <c r="O49" s="12">
        <v>63</v>
      </c>
      <c r="P49" s="8" t="s">
        <v>17</v>
      </c>
    </row>
    <row r="50" spans="2:16" ht="15" customHeight="true">
      <c r="B50" s="6" t="s">
        <v>66</v>
      </c>
      <c r="C50" s="7" t="s">
        <v>16</v>
      </c>
      <c r="D50" s="8" t="s">
        <v>17</v>
      </c>
      <c r="E50" s="8" t="s">
        <v>18</v>
      </c>
      <c r="F50" s="8" t="s">
        <v>17</v>
      </c>
      <c r="G50" s="8" t="s">
        <v>17</v>
      </c>
      <c r="H50" s="9">
        <v>24.0987551217293</v>
      </c>
      <c r="I50" s="9">
        <v>24.0987551217293</v>
      </c>
      <c r="J50" s="10">
        <v>0</v>
      </c>
      <c r="K50" s="11" />
      <c r="L50" s="10" />
      <c r="M50" s="11" />
      <c r="N50" s="11">
        <v>0</v>
      </c>
      <c r="O50" s="12">
        <v>63</v>
      </c>
      <c r="P50" s="8" t="s">
        <v>17</v>
      </c>
    </row>
    <row r="51" spans="2:16" ht="15" customHeight="true">
      <c r="B51" s="6" t="s">
        <v>67</v>
      </c>
      <c r="C51" s="7" t="s">
        <v>16</v>
      </c>
      <c r="D51" s="8" t="s">
        <v>17</v>
      </c>
      <c r="E51" s="8" t="s">
        <v>18</v>
      </c>
      <c r="F51" s="8" t="s">
        <v>17</v>
      </c>
      <c r="G51" s="8" t="s">
        <v>17</v>
      </c>
      <c r="H51" s="9">
        <v>26.3111539194367</v>
      </c>
      <c r="I51" s="9">
        <v>26.3111539194367</v>
      </c>
      <c r="J51" s="10">
        <v>0</v>
      </c>
      <c r="K51" s="11" />
      <c r="L51" s="10" />
      <c r="M51" s="11" />
      <c r="N51" s="11">
        <v>0</v>
      </c>
      <c r="O51" s="12">
        <v>63</v>
      </c>
      <c r="P51" s="8" t="s">
        <v>17</v>
      </c>
    </row>
    <row r="52" spans="2:16" ht="15" customHeight="true">
      <c r="B52" s="6" t="s">
        <v>68</v>
      </c>
      <c r="C52" s="7" t="s">
        <v>16</v>
      </c>
      <c r="D52" s="8" t="s">
        <v>17</v>
      </c>
      <c r="E52" s="8" t="s">
        <v>18</v>
      </c>
      <c r="F52" s="8" t="s">
        <v>17</v>
      </c>
      <c r="G52" s="8" t="s">
        <v>17</v>
      </c>
      <c r="H52" s="9">
        <v>30.1148730126756</v>
      </c>
      <c r="I52" s="9">
        <v>30.1148730126756</v>
      </c>
      <c r="J52" s="10">
        <v>0</v>
      </c>
      <c r="K52" s="11" />
      <c r="L52" s="10" />
      <c r="M52" s="11" />
      <c r="N52" s="11">
        <v>0</v>
      </c>
      <c r="O52" s="12">
        <v>63</v>
      </c>
      <c r="P52" s="8" t="s">
        <v>17</v>
      </c>
    </row>
    <row r="53" spans="2:16" ht="15" customHeight="true">
      <c r="B53" s="6" t="s">
        <v>69</v>
      </c>
      <c r="C53" s="7" t="s">
        <v>16</v>
      </c>
      <c r="D53" s="8" t="s">
        <v>17</v>
      </c>
      <c r="E53" s="8" t="s">
        <v>18</v>
      </c>
      <c r="F53" s="8" t="s">
        <v>17</v>
      </c>
      <c r="G53" s="8" t="s">
        <v>17</v>
      </c>
      <c r="H53" s="9">
        <v>30.3068575503644</v>
      </c>
      <c r="I53" s="9">
        <v>30.3068575503644</v>
      </c>
      <c r="J53" s="10">
        <v>0</v>
      </c>
      <c r="K53" s="11" />
      <c r="L53" s="10" />
      <c r="M53" s="11" />
      <c r="N53" s="11">
        <v>0</v>
      </c>
      <c r="O53" s="12">
        <v>63</v>
      </c>
      <c r="P53" s="8" t="s">
        <v>17</v>
      </c>
    </row>
    <row r="54" spans="2:16" ht="15" customHeight="true">
      <c r="B54" s="6" t="s">
        <v>70</v>
      </c>
      <c r="C54" s="7" t="s">
        <v>16</v>
      </c>
      <c r="D54" s="8" t="s">
        <v>17</v>
      </c>
      <c r="E54" s="8" t="s">
        <v>18</v>
      </c>
      <c r="F54" s="8" t="s">
        <v>17</v>
      </c>
      <c r="G54" s="8" t="s">
        <v>17</v>
      </c>
      <c r="H54" s="9">
        <v>31.2468237941919</v>
      </c>
      <c r="I54" s="9">
        <v>31.2468237941919</v>
      </c>
      <c r="J54" s="10">
        <v>0</v>
      </c>
      <c r="K54" s="11" />
      <c r="L54" s="10" />
      <c r="M54" s="11" />
      <c r="N54" s="11">
        <v>0</v>
      </c>
      <c r="O54" s="12">
        <v>63</v>
      </c>
      <c r="P54" s="8" t="s">
        <v>17</v>
      </c>
    </row>
    <row r="55" spans="2:16" ht="15" customHeight="true">
      <c r="B55" s="6" t="s">
        <v>71</v>
      </c>
      <c r="C55" s="7" t="s">
        <v>16</v>
      </c>
      <c r="D55" s="8" t="s">
        <v>17</v>
      </c>
      <c r="E55" s="8" t="s">
        <v>18</v>
      </c>
      <c r="F55" s="8" t="s">
        <v>17</v>
      </c>
      <c r="G55" s="8" t="s">
        <v>17</v>
      </c>
      <c r="H55" s="9">
        <v>31.6899699426395</v>
      </c>
      <c r="I55" s="9">
        <v>31.6899699426395</v>
      </c>
      <c r="J55" s="10">
        <v>0</v>
      </c>
      <c r="K55" s="11" />
      <c r="L55" s="10" />
      <c r="M55" s="11" />
      <c r="N55" s="11">
        <v>0</v>
      </c>
      <c r="O55" s="12">
        <v>63</v>
      </c>
      <c r="P55" s="8" t="s">
        <v>17</v>
      </c>
    </row>
    <row r="56" spans="2:16" ht="15" customHeight="true">
      <c r="B56" s="6" t="s">
        <v>72</v>
      </c>
      <c r="C56" s="7" t="s">
        <v>16</v>
      </c>
      <c r="D56" s="8" t="s">
        <v>17</v>
      </c>
      <c r="E56" s="8" t="s">
        <v>18</v>
      </c>
      <c r="F56" s="8" t="s">
        <v>17</v>
      </c>
      <c r="G56" s="8" t="s">
        <v>17</v>
      </c>
      <c r="H56" s="9">
        <v>37.4739250338325</v>
      </c>
      <c r="I56" s="9">
        <v>37.4739250338325</v>
      </c>
      <c r="J56" s="10">
        <v>0</v>
      </c>
      <c r="K56" s="11" />
      <c r="L56" s="10" />
      <c r="M56" s="11" />
      <c r="N56" s="11">
        <v>0</v>
      </c>
      <c r="O56" s="12">
        <v>63</v>
      </c>
      <c r="P56" s="8" t="s">
        <v>17</v>
      </c>
    </row>
    <row r="57" spans="2:16" ht="15" customHeight="true">
      <c r="B57" s="6" t="s">
        <v>73</v>
      </c>
      <c r="C57" s="7" t="s">
        <v>16</v>
      </c>
      <c r="D57" s="8" t="s">
        <v>17</v>
      </c>
      <c r="E57" s="8" t="s">
        <v>18</v>
      </c>
      <c r="F57" s="8" t="s">
        <v>17</v>
      </c>
      <c r="G57" s="8" t="s">
        <v>17</v>
      </c>
      <c r="H57" s="9">
        <v>37.5249611178826</v>
      </c>
      <c r="I57" s="9">
        <v>37.5249611178826</v>
      </c>
      <c r="J57" s="10">
        <v>0</v>
      </c>
      <c r="K57" s="11" />
      <c r="L57" s="10" />
      <c r="M57" s="11" />
      <c r="N57" s="11">
        <v>0</v>
      </c>
      <c r="O57" s="12">
        <v>63</v>
      </c>
      <c r="P57" s="8" t="s">
        <v>17</v>
      </c>
    </row>
    <row r="58" spans="2:16" ht="15" customHeight="true">
      <c r="B58" s="6" t="s">
        <v>74</v>
      </c>
      <c r="C58" s="7" t="s">
        <v>16</v>
      </c>
      <c r="D58" s="8" t="s">
        <v>17</v>
      </c>
      <c r="E58" s="8" t="s">
        <v>18</v>
      </c>
      <c r="F58" s="8" t="s">
        <v>17</v>
      </c>
      <c r="G58" s="8" t="s">
        <v>17</v>
      </c>
      <c r="H58" s="9" />
      <c r="I58" s="9">
        <v>0</v>
      </c>
      <c r="J58" s="10">
        <v>0</v>
      </c>
      <c r="K58" s="11" />
      <c r="L58" s="10" />
      <c r="M58" s="11">
        <v>0</v>
      </c>
      <c r="N58" s="11">
        <v>0</v>
      </c>
      <c r="O58" s="12">
        <v>63</v>
      </c>
      <c r="P58" s="8" t="s">
        <v>17</v>
      </c>
    </row>
    <row r="59" spans="2:16" ht="15" customHeight="true">
      <c r="B59" s="6" t="s">
        <v>75</v>
      </c>
      <c r="C59" s="7" t="s">
        <v>16</v>
      </c>
      <c r="D59" s="8" t="s">
        <v>17</v>
      </c>
      <c r="E59" s="8" t="s">
        <v>18</v>
      </c>
      <c r="F59" s="8" t="s">
        <v>17</v>
      </c>
      <c r="G59" s="8" t="s">
        <v>17</v>
      </c>
      <c r="H59" s="9" />
      <c r="I59" s="9">
        <v>0</v>
      </c>
      <c r="J59" s="10">
        <v>0</v>
      </c>
      <c r="K59" s="11" />
      <c r="L59" s="10" />
      <c r="M59" s="11">
        <v>0</v>
      </c>
      <c r="N59" s="11">
        <v>0</v>
      </c>
      <c r="O59" s="12">
        <v>63</v>
      </c>
      <c r="P59" s="8" t="s">
        <v>17</v>
      </c>
    </row>
    <row r="60" spans="2:16" ht="15" customHeight="true">
      <c r="B60" s="6" t="s">
        <v>76</v>
      </c>
      <c r="C60" s="7" t="s">
        <v>16</v>
      </c>
      <c r="D60" s="8" t="s">
        <v>17</v>
      </c>
      <c r="E60" s="8" t="s">
        <v>18</v>
      </c>
      <c r="F60" s="8" t="s">
        <v>17</v>
      </c>
      <c r="G60" s="8" t="s">
        <v>17</v>
      </c>
      <c r="H60" s="9" />
      <c r="I60" s="9">
        <v>0</v>
      </c>
      <c r="J60" s="10">
        <v>0</v>
      </c>
      <c r="K60" s="11" />
      <c r="L60" s="10" />
      <c r="M60" s="11">
        <v>0</v>
      </c>
      <c r="N60" s="11">
        <v>0</v>
      </c>
      <c r="O60" s="12">
        <v>63</v>
      </c>
      <c r="P60" s="8" t="s">
        <v>17</v>
      </c>
    </row>
    <row r="61" spans="2:16" ht="15" customHeight="true">
      <c r="B61" s="6" t="s">
        <v>77</v>
      </c>
      <c r="C61" s="7" t="s">
        <v>16</v>
      </c>
      <c r="D61" s="8" t="s">
        <v>17</v>
      </c>
      <c r="E61" s="8" t="s">
        <v>18</v>
      </c>
      <c r="F61" s="8" t="s">
        <v>17</v>
      </c>
      <c r="G61" s="8" t="s">
        <v>17</v>
      </c>
      <c r="H61" s="9" />
      <c r="I61" s="9">
        <v>0</v>
      </c>
      <c r="J61" s="10">
        <v>0</v>
      </c>
      <c r="K61" s="11" />
      <c r="L61" s="10" />
      <c r="M61" s="11">
        <v>0</v>
      </c>
      <c r="N61" s="11">
        <v>0</v>
      </c>
      <c r="O61" s="12">
        <v>63</v>
      </c>
      <c r="P61" s="8" t="s">
        <v>17</v>
      </c>
    </row>
    <row r="62" spans="2:16" ht="15" customHeight="true">
      <c r="B62" s="6" t="s">
        <v>78</v>
      </c>
      <c r="C62" s="7" t="s">
        <v>16</v>
      </c>
      <c r="D62" s="8" t="s">
        <v>17</v>
      </c>
      <c r="E62" s="8" t="s">
        <v>18</v>
      </c>
      <c r="F62" s="8" t="s">
        <v>17</v>
      </c>
      <c r="G62" s="8" t="s">
        <v>17</v>
      </c>
      <c r="H62" s="9">
        <v>24.2731558202593</v>
      </c>
      <c r="I62" s="9">
        <v>24.2731558202593</v>
      </c>
      <c r="J62" s="10">
        <v>0</v>
      </c>
      <c r="K62" s="11" />
      <c r="L62" s="10" />
      <c r="M62" s="11" />
      <c r="N62" s="11">
        <v>0</v>
      </c>
      <c r="O62" s="12">
        <v>63</v>
      </c>
      <c r="P62" s="8" t="s">
        <v>17</v>
      </c>
    </row>
    <row r="63" spans="2:16" ht="15" customHeight="true">
      <c r="B63" s="6" t="s">
        <v>79</v>
      </c>
      <c r="C63" s="7" t="s">
        <v>16</v>
      </c>
      <c r="D63" s="8" t="s">
        <v>17</v>
      </c>
      <c r="E63" s="8" t="s">
        <v>18</v>
      </c>
      <c r="F63" s="8" t="s">
        <v>17</v>
      </c>
      <c r="G63" s="8" t="s">
        <v>17</v>
      </c>
      <c r="H63" s="9">
        <v>26.3501811296488</v>
      </c>
      <c r="I63" s="9">
        <v>26.3501811296488</v>
      </c>
      <c r="J63" s="10">
        <v>0</v>
      </c>
      <c r="K63" s="11" />
      <c r="L63" s="10" />
      <c r="M63" s="11" />
      <c r="N63" s="11">
        <v>0</v>
      </c>
      <c r="O63" s="12">
        <v>63</v>
      </c>
      <c r="P63" s="8" t="s">
        <v>17</v>
      </c>
    </row>
    <row r="64" spans="2:16" ht="15" customHeight="true">
      <c r="B64" s="6" t="s">
        <v>80</v>
      </c>
      <c r="C64" s="7" t="s">
        <v>16</v>
      </c>
      <c r="D64" s="8" t="s">
        <v>17</v>
      </c>
      <c r="E64" s="8" t="s">
        <v>18</v>
      </c>
      <c r="F64" s="8" t="s">
        <v>17</v>
      </c>
      <c r="G64" s="8" t="s">
        <v>17</v>
      </c>
      <c r="H64" s="9">
        <v>30.5708013521115</v>
      </c>
      <c r="I64" s="9">
        <v>30.5708013521115</v>
      </c>
      <c r="J64" s="10">
        <v>0</v>
      </c>
      <c r="K64" s="11" />
      <c r="L64" s="10" />
      <c r="M64" s="11" />
      <c r="N64" s="11">
        <v>0</v>
      </c>
      <c r="O64" s="12">
        <v>63</v>
      </c>
      <c r="P64" s="8" t="s">
        <v>17</v>
      </c>
    </row>
    <row r="65" spans="2:16" ht="15" customHeight="true">
      <c r="B65" s="6" t="s">
        <v>81</v>
      </c>
      <c r="C65" s="7" t="s">
        <v>16</v>
      </c>
      <c r="D65" s="8" t="s">
        <v>17</v>
      </c>
      <c r="E65" s="8" t="s">
        <v>18</v>
      </c>
      <c r="F65" s="8" t="s">
        <v>17</v>
      </c>
      <c r="G65" s="8" t="s">
        <v>17</v>
      </c>
      <c r="H65" s="9">
        <v>30.2946639127921</v>
      </c>
      <c r="I65" s="9">
        <v>30.2946639127921</v>
      </c>
      <c r="J65" s="10">
        <v>0</v>
      </c>
      <c r="K65" s="11" />
      <c r="L65" s="10" />
      <c r="M65" s="11" />
      <c r="N65" s="11">
        <v>0</v>
      </c>
      <c r="O65" s="12">
        <v>63</v>
      </c>
      <c r="P65" s="8" t="s">
        <v>17</v>
      </c>
    </row>
    <row r="66" spans="2:16" ht="15" customHeight="true">
      <c r="B66" s="6" t="s">
        <v>82</v>
      </c>
      <c r="C66" s="7" t="s">
        <v>16</v>
      </c>
      <c r="D66" s="8" t="s">
        <v>17</v>
      </c>
      <c r="E66" s="8" t="s">
        <v>18</v>
      </c>
      <c r="F66" s="8" t="s">
        <v>17</v>
      </c>
      <c r="G66" s="8" t="s">
        <v>17</v>
      </c>
      <c r="H66" s="9">
        <v>31.747280037445</v>
      </c>
      <c r="I66" s="9">
        <v>31.747280037445</v>
      </c>
      <c r="J66" s="10">
        <v>0</v>
      </c>
      <c r="K66" s="11" />
      <c r="L66" s="10" />
      <c r="M66" s="11" />
      <c r="N66" s="11">
        <v>0</v>
      </c>
      <c r="O66" s="12">
        <v>63</v>
      </c>
      <c r="P66" s="8" t="s">
        <v>17</v>
      </c>
    </row>
    <row r="67" spans="2:16" ht="15" customHeight="true">
      <c r="B67" s="6" t="s">
        <v>83</v>
      </c>
      <c r="C67" s="7" t="s">
        <v>16</v>
      </c>
      <c r="D67" s="8" t="s">
        <v>17</v>
      </c>
      <c r="E67" s="8" t="s">
        <v>18</v>
      </c>
      <c r="F67" s="8" t="s">
        <v>17</v>
      </c>
      <c r="G67" s="8" t="s">
        <v>17</v>
      </c>
      <c r="H67" s="9">
        <v>32.0276625882518</v>
      </c>
      <c r="I67" s="9">
        <v>32.0276625882518</v>
      </c>
      <c r="J67" s="10">
        <v>0</v>
      </c>
      <c r="K67" s="11" />
      <c r="L67" s="10" />
      <c r="M67" s="11" />
      <c r="N67" s="11">
        <v>0</v>
      </c>
      <c r="O67" s="12">
        <v>63</v>
      </c>
      <c r="P67" s="8" t="s">
        <v>17</v>
      </c>
    </row>
    <row r="68" spans="2:16" ht="15" customHeight="true">
      <c r="B68" s="6" t="s">
        <v>84</v>
      </c>
      <c r="C68" s="7" t="s">
        <v>16</v>
      </c>
      <c r="D68" s="8" t="s">
        <v>17</v>
      </c>
      <c r="E68" s="8" t="s">
        <v>18</v>
      </c>
      <c r="F68" s="8" t="s">
        <v>17</v>
      </c>
      <c r="G68" s="8" t="s">
        <v>17</v>
      </c>
      <c r="H68" s="9" />
      <c r="I68" s="9">
        <v>0</v>
      </c>
      <c r="J68" s="10">
        <v>0</v>
      </c>
      <c r="K68" s="11" />
      <c r="L68" s="10" />
      <c r="M68" s="11">
        <v>0</v>
      </c>
      <c r="N68" s="11">
        <v>0</v>
      </c>
      <c r="O68" s="12">
        <v>63</v>
      </c>
      <c r="P68" s="8" t="s">
        <v>17</v>
      </c>
    </row>
    <row r="69" spans="2:16" ht="15" customHeight="true">
      <c r="B69" s="6" t="s">
        <v>85</v>
      </c>
      <c r="C69" s="7" t="s">
        <v>16</v>
      </c>
      <c r="D69" s="8" t="s">
        <v>17</v>
      </c>
      <c r="E69" s="8" t="s">
        <v>18</v>
      </c>
      <c r="F69" s="8" t="s">
        <v>17</v>
      </c>
      <c r="G69" s="8" t="s">
        <v>17</v>
      </c>
      <c r="H69" s="9" />
      <c r="I69" s="9">
        <v>0</v>
      </c>
      <c r="J69" s="10">
        <v>0</v>
      </c>
      <c r="K69" s="11" />
      <c r="L69" s="10" />
      <c r="M69" s="11">
        <v>0</v>
      </c>
      <c r="N69" s="11">
        <v>0</v>
      </c>
      <c r="O69" s="12">
        <v>63</v>
      </c>
      <c r="P69" s="8" t="s">
        <v>17</v>
      </c>
    </row>
    <row r="70" spans="2:16" ht="15" customHeight="true">
      <c r="B70" s="6" t="s">
        <v>86</v>
      </c>
      <c r="C70" s="7" t="s">
        <v>16</v>
      </c>
      <c r="D70" s="8" t="s">
        <v>17</v>
      </c>
      <c r="E70" s="8" t="s">
        <v>18</v>
      </c>
      <c r="F70" s="8" t="s">
        <v>17</v>
      </c>
      <c r="G70" s="8" t="s">
        <v>17</v>
      </c>
      <c r="H70" s="9">
        <v>37.5923428577394</v>
      </c>
      <c r="I70" s="9">
        <v>37.5923428577394</v>
      </c>
      <c r="J70" s="10">
        <v>0</v>
      </c>
      <c r="K70" s="11" />
      <c r="L70" s="10" />
      <c r="M70" s="11" />
      <c r="N70" s="11">
        <v>0</v>
      </c>
      <c r="O70" s="12">
        <v>63</v>
      </c>
      <c r="P70" s="8" t="s">
        <v>17</v>
      </c>
    </row>
    <row r="71" spans="2:16" ht="15" customHeight="true">
      <c r="B71" s="6" t="s">
        <v>87</v>
      </c>
      <c r="C71" s="7" t="s">
        <v>16</v>
      </c>
      <c r="D71" s="8" t="s">
        <v>17</v>
      </c>
      <c r="E71" s="8" t="s">
        <v>18</v>
      </c>
      <c r="F71" s="8" t="s">
        <v>17</v>
      </c>
      <c r="G71" s="8" t="s">
        <v>17</v>
      </c>
      <c r="H71" s="9" />
      <c r="I71" s="9">
        <v>0</v>
      </c>
      <c r="J71" s="10">
        <v>0</v>
      </c>
      <c r="K71" s="11" />
      <c r="L71" s="10" />
      <c r="M71" s="11">
        <v>0</v>
      </c>
      <c r="N71" s="11">
        <v>0</v>
      </c>
      <c r="O71" s="12">
        <v>63</v>
      </c>
      <c r="P71" s="8" t="s">
        <v>17</v>
      </c>
    </row>
    <row r="72" spans="2:16" ht="15" customHeight="true">
      <c r="B72" s="6" t="s">
        <v>88</v>
      </c>
      <c r="C72" s="7" t="s">
        <v>16</v>
      </c>
      <c r="D72" s="8" t="s">
        <v>17</v>
      </c>
      <c r="E72" s="8" t="s">
        <v>18</v>
      </c>
      <c r="F72" s="8" t="s">
        <v>17</v>
      </c>
      <c r="G72" s="8" t="s">
        <v>17</v>
      </c>
      <c r="H72" s="9" />
      <c r="I72" s="9">
        <v>0</v>
      </c>
      <c r="J72" s="10">
        <v>0</v>
      </c>
      <c r="K72" s="11" />
      <c r="L72" s="10" />
      <c r="M72" s="11">
        <v>0</v>
      </c>
      <c r="N72" s="11">
        <v>0</v>
      </c>
      <c r="O72" s="12">
        <v>63</v>
      </c>
      <c r="P72" s="8" t="s">
        <v>17</v>
      </c>
    </row>
    <row r="73" spans="2:16" ht="15" customHeight="true">
      <c r="B73" s="6" t="s">
        <v>89</v>
      </c>
      <c r="C73" s="7" t="s">
        <v>16</v>
      </c>
      <c r="D73" s="8" t="s">
        <v>17</v>
      </c>
      <c r="E73" s="8" t="s">
        <v>18</v>
      </c>
      <c r="F73" s="8" t="s">
        <v>17</v>
      </c>
      <c r="G73" s="8" t="s">
        <v>17</v>
      </c>
      <c r="H73" s="9" />
      <c r="I73" s="9">
        <v>0</v>
      </c>
      <c r="J73" s="10">
        <v>0</v>
      </c>
      <c r="K73" s="11" />
      <c r="L73" s="10" />
      <c r="M73" s="11">
        <v>0</v>
      </c>
      <c r="N73" s="11">
        <v>0</v>
      </c>
      <c r="O73" s="12">
        <v>63</v>
      </c>
      <c r="P73" s="8" t="s">
        <v>17</v>
      </c>
    </row>
    <row r="74" spans="2:16" ht="15" customHeight="true">
      <c r="B74" s="6" t="s">
        <v>90</v>
      </c>
      <c r="C74" s="7" t="s">
        <v>16</v>
      </c>
      <c r="D74" s="8" t="s">
        <v>17</v>
      </c>
      <c r="E74" s="8" t="s">
        <v>18</v>
      </c>
      <c r="F74" s="8" t="s">
        <v>17</v>
      </c>
      <c r="G74" s="8" t="s">
        <v>17</v>
      </c>
      <c r="H74" s="9">
        <v>24.0810834155726</v>
      </c>
      <c r="I74" s="9">
        <v>24.0810834155726</v>
      </c>
      <c r="J74" s="10">
        <v>0</v>
      </c>
      <c r="K74" s="11" />
      <c r="L74" s="10" />
      <c r="M74" s="11" />
      <c r="N74" s="11">
        <v>0</v>
      </c>
      <c r="O74" s="12">
        <v>63</v>
      </c>
      <c r="P74" s="8" t="s">
        <v>17</v>
      </c>
    </row>
    <row r="75" spans="2:16" ht="15" customHeight="true">
      <c r="B75" s="6" t="s">
        <v>91</v>
      </c>
      <c r="C75" s="7" t="s">
        <v>16</v>
      </c>
      <c r="D75" s="8" t="s">
        <v>17</v>
      </c>
      <c r="E75" s="8" t="s">
        <v>18</v>
      </c>
      <c r="F75" s="8" t="s">
        <v>17</v>
      </c>
      <c r="G75" s="8" t="s">
        <v>17</v>
      </c>
      <c r="H75" s="9">
        <v>26.2731636318657</v>
      </c>
      <c r="I75" s="9">
        <v>26.2731636318657</v>
      </c>
      <c r="J75" s="10">
        <v>0</v>
      </c>
      <c r="K75" s="11" />
      <c r="L75" s="10" />
      <c r="M75" s="11" />
      <c r="N75" s="11">
        <v>0</v>
      </c>
      <c r="O75" s="12">
        <v>63</v>
      </c>
      <c r="P75" s="8" t="s">
        <v>17</v>
      </c>
    </row>
    <row r="76" spans="2:16" ht="15" customHeight="true">
      <c r="B76" s="6" t="s">
        <v>92</v>
      </c>
      <c r="C76" s="7" t="s">
        <v>16</v>
      </c>
      <c r="D76" s="8" t="s">
        <v>17</v>
      </c>
      <c r="E76" s="8" t="s">
        <v>18</v>
      </c>
      <c r="F76" s="8" t="s">
        <v>17</v>
      </c>
      <c r="G76" s="8" t="s">
        <v>17</v>
      </c>
      <c r="H76" s="9">
        <v>30.4870778623383</v>
      </c>
      <c r="I76" s="9">
        <v>30.4870778623383</v>
      </c>
      <c r="J76" s="10">
        <v>0</v>
      </c>
      <c r="K76" s="11" />
      <c r="L76" s="10" />
      <c r="M76" s="11" />
      <c r="N76" s="11">
        <v>0</v>
      </c>
      <c r="O76" s="12">
        <v>63</v>
      </c>
      <c r="P76" s="8" t="s">
        <v>17</v>
      </c>
    </row>
    <row r="77" spans="2:16" ht="15" customHeight="true">
      <c r="B77" s="6" t="s">
        <v>93</v>
      </c>
      <c r="C77" s="7" t="s">
        <v>16</v>
      </c>
      <c r="D77" s="8" t="s">
        <v>17</v>
      </c>
      <c r="E77" s="8" t="s">
        <v>18</v>
      </c>
      <c r="F77" s="8" t="s">
        <v>17</v>
      </c>
      <c r="G77" s="8" t="s">
        <v>17</v>
      </c>
      <c r="H77" s="9">
        <v>30.2188308628556</v>
      </c>
      <c r="I77" s="9">
        <v>30.2188308628556</v>
      </c>
      <c r="J77" s="10">
        <v>0</v>
      </c>
      <c r="K77" s="11" />
      <c r="L77" s="10" />
      <c r="M77" s="11" />
      <c r="N77" s="11">
        <v>0</v>
      </c>
      <c r="O77" s="12">
        <v>63</v>
      </c>
      <c r="P77" s="8" t="s">
        <v>17</v>
      </c>
    </row>
    <row r="78" spans="2:16" ht="15" customHeight="true">
      <c r="B78" s="6" t="s">
        <v>94</v>
      </c>
      <c r="C78" s="7" t="s">
        <v>16</v>
      </c>
      <c r="D78" s="8" t="s">
        <v>17</v>
      </c>
      <c r="E78" s="8" t="s">
        <v>18</v>
      </c>
      <c r="F78" s="8" t="s">
        <v>17</v>
      </c>
      <c r="G78" s="8" t="s">
        <v>17</v>
      </c>
      <c r="H78" s="9">
        <v>31.6419960382638</v>
      </c>
      <c r="I78" s="9">
        <v>31.6419960382638</v>
      </c>
      <c r="J78" s="10">
        <v>0</v>
      </c>
      <c r="K78" s="11" />
      <c r="L78" s="10" />
      <c r="M78" s="11" />
      <c r="N78" s="11">
        <v>0</v>
      </c>
      <c r="O78" s="12">
        <v>63</v>
      </c>
      <c r="P78" s="8" t="s">
        <v>17</v>
      </c>
    </row>
    <row r="79" spans="2:16" ht="15" customHeight="true">
      <c r="B79" s="6" t="s">
        <v>95</v>
      </c>
      <c r="C79" s="7" t="s">
        <v>16</v>
      </c>
      <c r="D79" s="8" t="s">
        <v>17</v>
      </c>
      <c r="E79" s="8" t="s">
        <v>18</v>
      </c>
      <c r="F79" s="8" t="s">
        <v>17</v>
      </c>
      <c r="G79" s="8" t="s">
        <v>17</v>
      </c>
      <c r="H79" s="9">
        <v>31.9099312257658</v>
      </c>
      <c r="I79" s="9">
        <v>31.9099312257658</v>
      </c>
      <c r="J79" s="10">
        <v>0</v>
      </c>
      <c r="K79" s="11" />
      <c r="L79" s="10" />
      <c r="M79" s="11" />
      <c r="N79" s="11">
        <v>0</v>
      </c>
      <c r="O79" s="12">
        <v>63</v>
      </c>
      <c r="P79" s="8" t="s">
        <v>17</v>
      </c>
    </row>
    <row r="80" spans="2:16" ht="15" customHeight="true">
      <c r="B80" s="6" t="s">
        <v>96</v>
      </c>
      <c r="C80" s="7" t="s">
        <v>16</v>
      </c>
      <c r="D80" s="8" t="s">
        <v>17</v>
      </c>
      <c r="E80" s="8" t="s">
        <v>18</v>
      </c>
      <c r="F80" s="8" t="s">
        <v>17</v>
      </c>
      <c r="G80" s="8" t="s">
        <v>17</v>
      </c>
      <c r="H80" s="9" />
      <c r="I80" s="9">
        <v>0</v>
      </c>
      <c r="J80" s="10">
        <v>0</v>
      </c>
      <c r="K80" s="11" />
      <c r="L80" s="10" />
      <c r="M80" s="11">
        <v>0</v>
      </c>
      <c r="N80" s="11">
        <v>0</v>
      </c>
      <c r="O80" s="12">
        <v>63</v>
      </c>
      <c r="P80" s="8" t="s">
        <v>17</v>
      </c>
    </row>
    <row r="81" spans="2:16" ht="15" customHeight="true">
      <c r="B81" s="6" t="s">
        <v>97</v>
      </c>
      <c r="C81" s="7" t="s">
        <v>16</v>
      </c>
      <c r="D81" s="8" t="s">
        <v>17</v>
      </c>
      <c r="E81" s="8" t="s">
        <v>18</v>
      </c>
      <c r="F81" s="8" t="s">
        <v>17</v>
      </c>
      <c r="G81" s="8" t="s">
        <v>17</v>
      </c>
      <c r="H81" s="9" />
      <c r="I81" s="9">
        <v>0</v>
      </c>
      <c r="J81" s="10">
        <v>0</v>
      </c>
      <c r="K81" s="11" />
      <c r="L81" s="10" />
      <c r="M81" s="11">
        <v>0</v>
      </c>
      <c r="N81" s="11">
        <v>0</v>
      </c>
      <c r="O81" s="12">
        <v>63</v>
      </c>
      <c r="P81" s="8" t="s">
        <v>17</v>
      </c>
    </row>
    <row r="82" spans="2:16" ht="15" customHeight="true">
      <c r="B82" s="6" t="s">
        <v>98</v>
      </c>
      <c r="C82" s="7" t="s">
        <v>16</v>
      </c>
      <c r="D82" s="8" t="s">
        <v>17</v>
      </c>
      <c r="E82" s="8" t="s">
        <v>18</v>
      </c>
      <c r="F82" s="8" t="s">
        <v>17</v>
      </c>
      <c r="G82" s="8" t="s">
        <v>17</v>
      </c>
      <c r="H82" s="9">
        <v>37.835834034519</v>
      </c>
      <c r="I82" s="9">
        <v>37.835834034519</v>
      </c>
      <c r="J82" s="10">
        <v>0</v>
      </c>
      <c r="K82" s="11" />
      <c r="L82" s="10" />
      <c r="M82" s="11" />
      <c r="N82" s="11">
        <v>0</v>
      </c>
      <c r="O82" s="12">
        <v>63</v>
      </c>
      <c r="P82" s="8" t="s">
        <v>17</v>
      </c>
    </row>
    <row r="83" spans="2:16" ht="15" customHeight="true">
      <c r="B83" s="6" t="s">
        <v>99</v>
      </c>
      <c r="C83" s="7" t="s">
        <v>16</v>
      </c>
      <c r="D83" s="8" t="s">
        <v>17</v>
      </c>
      <c r="E83" s="8" t="s">
        <v>18</v>
      </c>
      <c r="F83" s="8" t="s">
        <v>17</v>
      </c>
      <c r="G83" s="8" t="s">
        <v>17</v>
      </c>
      <c r="H83" s="9" />
      <c r="I83" s="9">
        <v>0</v>
      </c>
      <c r="J83" s="10">
        <v>0</v>
      </c>
      <c r="K83" s="11" />
      <c r="L83" s="10" />
      <c r="M83" s="11">
        <v>0</v>
      </c>
      <c r="N83" s="11">
        <v>0</v>
      </c>
      <c r="O83" s="12">
        <v>63</v>
      </c>
      <c r="P83" s="8" t="s">
        <v>17</v>
      </c>
    </row>
    <row r="84" spans="2:16" ht="15" customHeight="true">
      <c r="B84" s="6" t="s">
        <v>100</v>
      </c>
      <c r="C84" s="7" t="s">
        <v>16</v>
      </c>
      <c r="D84" s="8" t="s">
        <v>17</v>
      </c>
      <c r="E84" s="8" t="s">
        <v>18</v>
      </c>
      <c r="F84" s="8" t="s">
        <v>17</v>
      </c>
      <c r="G84" s="8" t="s">
        <v>17</v>
      </c>
      <c r="H84" s="9" />
      <c r="I84" s="9">
        <v>0</v>
      </c>
      <c r="J84" s="10">
        <v>0</v>
      </c>
      <c r="K84" s="11" />
      <c r="L84" s="10" />
      <c r="M84" s="11">
        <v>0</v>
      </c>
      <c r="N84" s="11">
        <v>0</v>
      </c>
      <c r="O84" s="12">
        <v>63</v>
      </c>
      <c r="P84" s="8" t="s">
        <v>17</v>
      </c>
    </row>
    <row r="85" spans="2:16" ht="15" customHeight="true">
      <c r="B85" s="6" t="s">
        <v>101</v>
      </c>
      <c r="C85" s="7" t="s">
        <v>16</v>
      </c>
      <c r="D85" s="8" t="s">
        <v>17</v>
      </c>
      <c r="E85" s="8" t="s">
        <v>18</v>
      </c>
      <c r="F85" s="8" t="s">
        <v>17</v>
      </c>
      <c r="G85" s="8" t="s">
        <v>17</v>
      </c>
      <c r="H85" s="9" />
      <c r="I85" s="9">
        <v>0</v>
      </c>
      <c r="J85" s="10">
        <v>0</v>
      </c>
      <c r="K85" s="11" />
      <c r="L85" s="10" />
      <c r="M85" s="11">
        <v>0</v>
      </c>
      <c r="N85" s="11">
        <v>0</v>
      </c>
      <c r="O85" s="12">
        <v>63</v>
      </c>
      <c r="P85" s="8" t="s">
        <v>17</v>
      </c>
    </row>
    <row r="86" spans="2:16" ht="15" customHeight="true">
      <c r="B86" s="6" t="s">
        <v>102</v>
      </c>
      <c r="C86" s="7" t="s">
        <v>16</v>
      </c>
      <c r="D86" s="8" t="s">
        <v>17</v>
      </c>
      <c r="E86" s="8" t="s">
        <v>18</v>
      </c>
      <c r="F86" s="8" t="s">
        <v>17</v>
      </c>
      <c r="G86" s="8" t="s">
        <v>17</v>
      </c>
      <c r="H86" s="9">
        <v>24.3604900243016</v>
      </c>
      <c r="I86" s="9">
        <v>24.3604900243016</v>
      </c>
      <c r="J86" s="10">
        <v>0</v>
      </c>
      <c r="K86" s="11" />
      <c r="L86" s="10" />
      <c r="M86" s="11" />
      <c r="N86" s="11">
        <v>0</v>
      </c>
      <c r="O86" s="12">
        <v>63</v>
      </c>
      <c r="P86" s="8" t="s">
        <v>17</v>
      </c>
    </row>
    <row r="87" spans="2:16" ht="15" customHeight="true">
      <c r="B87" s="6" t="s">
        <v>103</v>
      </c>
      <c r="C87" s="7" t="s">
        <v>16</v>
      </c>
      <c r="D87" s="8" t="s">
        <v>17</v>
      </c>
      <c r="E87" s="8" t="s">
        <v>18</v>
      </c>
      <c r="F87" s="8" t="s">
        <v>17</v>
      </c>
      <c r="G87" s="8" t="s">
        <v>17</v>
      </c>
      <c r="H87" s="9">
        <v>26.2920288761442</v>
      </c>
      <c r="I87" s="9">
        <v>26.2920288761442</v>
      </c>
      <c r="J87" s="10">
        <v>0</v>
      </c>
      <c r="K87" s="11" />
      <c r="L87" s="10" />
      <c r="M87" s="11" />
      <c r="N87" s="11">
        <v>0</v>
      </c>
      <c r="O87" s="12">
        <v>63</v>
      </c>
      <c r="P87" s="8" t="s">
        <v>17</v>
      </c>
    </row>
    <row r="88" spans="2:16" ht="15" customHeight="true">
      <c r="B88" s="6" t="s">
        <v>104</v>
      </c>
      <c r="C88" s="7" t="s">
        <v>16</v>
      </c>
      <c r="D88" s="8" t="s">
        <v>17</v>
      </c>
      <c r="E88" s="8" t="s">
        <v>18</v>
      </c>
      <c r="F88" s="8" t="s">
        <v>17</v>
      </c>
      <c r="G88" s="8" t="s">
        <v>17</v>
      </c>
      <c r="H88" s="9">
        <v>30.8240961435178</v>
      </c>
      <c r="I88" s="9">
        <v>30.8240961435178</v>
      </c>
      <c r="J88" s="10">
        <v>0</v>
      </c>
      <c r="K88" s="11" />
      <c r="L88" s="10" />
      <c r="M88" s="11" />
      <c r="N88" s="11">
        <v>0</v>
      </c>
      <c r="O88" s="12">
        <v>63</v>
      </c>
      <c r="P88" s="8" t="s">
        <v>17</v>
      </c>
    </row>
    <row r="89" spans="2:16" ht="15" customHeight="true">
      <c r="B89" s="6" t="s">
        <v>105</v>
      </c>
      <c r="C89" s="7" t="s">
        <v>16</v>
      </c>
      <c r="D89" s="8" t="s">
        <v>17</v>
      </c>
      <c r="E89" s="8" t="s">
        <v>18</v>
      </c>
      <c r="F89" s="8" t="s">
        <v>17</v>
      </c>
      <c r="G89" s="8" t="s">
        <v>17</v>
      </c>
      <c r="H89" s="9">
        <v>30.1845379133161</v>
      </c>
      <c r="I89" s="9">
        <v>30.1845379133161</v>
      </c>
      <c r="J89" s="10">
        <v>0</v>
      </c>
      <c r="K89" s="11" />
      <c r="L89" s="10" />
      <c r="M89" s="11" />
      <c r="N89" s="11">
        <v>0</v>
      </c>
      <c r="O89" s="12">
        <v>63</v>
      </c>
      <c r="P89" s="8" t="s">
        <v>17</v>
      </c>
    </row>
    <row r="90" spans="2:16" ht="15" customHeight="true">
      <c r="B90" s="6" t="s">
        <v>106</v>
      </c>
      <c r="C90" s="7" t="s">
        <v>16</v>
      </c>
      <c r="D90" s="8" t="s">
        <v>17</v>
      </c>
      <c r="E90" s="8" t="s">
        <v>18</v>
      </c>
      <c r="F90" s="8" t="s">
        <v>17</v>
      </c>
      <c r="G90" s="8" t="s">
        <v>17</v>
      </c>
      <c r="H90" s="9">
        <v>31.5061263781955</v>
      </c>
      <c r="I90" s="9">
        <v>31.5061263781955</v>
      </c>
      <c r="J90" s="10">
        <v>0</v>
      </c>
      <c r="K90" s="11" />
      <c r="L90" s="10" />
      <c r="M90" s="11" />
      <c r="N90" s="11">
        <v>0</v>
      </c>
      <c r="O90" s="12">
        <v>63</v>
      </c>
      <c r="P90" s="8" t="s">
        <v>17</v>
      </c>
    </row>
    <row r="91" spans="2:16" ht="15" customHeight="true">
      <c r="B91" s="6" t="s">
        <v>107</v>
      </c>
      <c r="C91" s="7" t="s">
        <v>16</v>
      </c>
      <c r="D91" s="8" t="s">
        <v>17</v>
      </c>
      <c r="E91" s="8" t="s">
        <v>18</v>
      </c>
      <c r="F91" s="8" t="s">
        <v>17</v>
      </c>
      <c r="G91" s="8" t="s">
        <v>17</v>
      </c>
      <c r="H91" s="9">
        <v>31.8364312580474</v>
      </c>
      <c r="I91" s="9">
        <v>31.8364312580474</v>
      </c>
      <c r="J91" s="10">
        <v>0</v>
      </c>
      <c r="K91" s="11" />
      <c r="L91" s="10" />
      <c r="M91" s="11" />
      <c r="N91" s="11">
        <v>0</v>
      </c>
      <c r="O91" s="12">
        <v>63</v>
      </c>
      <c r="P91" s="8" t="s">
        <v>17</v>
      </c>
    </row>
    <row r="92" spans="2:16" ht="15" customHeight="true">
      <c r="B92" s="6" t="s">
        <v>108</v>
      </c>
      <c r="C92" s="7" t="s">
        <v>16</v>
      </c>
      <c r="D92" s="8" t="s">
        <v>17</v>
      </c>
      <c r="E92" s="8" t="s">
        <v>18</v>
      </c>
      <c r="F92" s="8" t="s">
        <v>17</v>
      </c>
      <c r="G92" s="8" t="s">
        <v>17</v>
      </c>
      <c r="H92" s="9" />
      <c r="I92" s="9">
        <v>0</v>
      </c>
      <c r="J92" s="10">
        <v>0</v>
      </c>
      <c r="K92" s="11" />
      <c r="L92" s="10" />
      <c r="M92" s="11">
        <v>0</v>
      </c>
      <c r="N92" s="11">
        <v>0</v>
      </c>
      <c r="O92" s="12">
        <v>63</v>
      </c>
      <c r="P92" s="8" t="s">
        <v>17</v>
      </c>
    </row>
    <row r="93" spans="2:16" ht="15" customHeight="true">
      <c r="B93" s="6" t="s">
        <v>109</v>
      </c>
      <c r="C93" s="7" t="s">
        <v>16</v>
      </c>
      <c r="D93" s="8" t="s">
        <v>17</v>
      </c>
      <c r="E93" s="8" t="s">
        <v>18</v>
      </c>
      <c r="F93" s="8" t="s">
        <v>17</v>
      </c>
      <c r="G93" s="8" t="s">
        <v>17</v>
      </c>
      <c r="H93" s="9">
        <v>38.457388347576</v>
      </c>
      <c r="I93" s="9">
        <v>38.457388347576</v>
      </c>
      <c r="J93" s="10">
        <v>0</v>
      </c>
      <c r="K93" s="11" />
      <c r="L93" s="10" />
      <c r="M93" s="11" />
      <c r="N93" s="11">
        <v>0</v>
      </c>
      <c r="O93" s="12">
        <v>63</v>
      </c>
      <c r="P93" s="8" t="s">
        <v>17</v>
      </c>
    </row>
    <row r="94" spans="2:16" ht="15" customHeight="true">
      <c r="B94" s="6" t="s">
        <v>110</v>
      </c>
      <c r="C94" s="7" t="s">
        <v>16</v>
      </c>
      <c r="D94" s="8" t="s">
        <v>17</v>
      </c>
      <c r="E94" s="8" t="s">
        <v>18</v>
      </c>
      <c r="F94" s="8" t="s">
        <v>17</v>
      </c>
      <c r="G94" s="8" t="s">
        <v>17</v>
      </c>
      <c r="H94" s="9">
        <v>39.8983240324189</v>
      </c>
      <c r="I94" s="9">
        <v>39.8983240324189</v>
      </c>
      <c r="J94" s="10">
        <v>0</v>
      </c>
      <c r="K94" s="11" />
      <c r="L94" s="10" />
      <c r="M94" s="11" />
      <c r="N94" s="11">
        <v>0</v>
      </c>
      <c r="O94" s="12">
        <v>63</v>
      </c>
      <c r="P94" s="8" t="s">
        <v>17</v>
      </c>
    </row>
    <row r="95" spans="2:16" ht="15" customHeight="true">
      <c r="B95" s="6" t="s">
        <v>111</v>
      </c>
      <c r="C95" s="7" t="s">
        <v>16</v>
      </c>
      <c r="D95" s="8" t="s">
        <v>17</v>
      </c>
      <c r="E95" s="8" t="s">
        <v>18</v>
      </c>
      <c r="F95" s="8" t="s">
        <v>17</v>
      </c>
      <c r="G95" s="8" t="s">
        <v>17</v>
      </c>
      <c r="H95" s="9" />
      <c r="I95" s="9">
        <v>0</v>
      </c>
      <c r="J95" s="10">
        <v>0</v>
      </c>
      <c r="K95" s="11" />
      <c r="L95" s="10" />
      <c r="M95" s="11">
        <v>0</v>
      </c>
      <c r="N95" s="11">
        <v>0</v>
      </c>
      <c r="O95" s="12">
        <v>63</v>
      </c>
      <c r="P95" s="8" t="s">
        <v>17</v>
      </c>
    </row>
    <row r="96" spans="2:16" ht="15" customHeight="true">
      <c r="B96" s="6" t="s">
        <v>112</v>
      </c>
      <c r="C96" s="7" t="s">
        <v>16</v>
      </c>
      <c r="D96" s="8" t="s">
        <v>17</v>
      </c>
      <c r="E96" s="8" t="s">
        <v>18</v>
      </c>
      <c r="F96" s="8" t="s">
        <v>17</v>
      </c>
      <c r="G96" s="8" t="s">
        <v>17</v>
      </c>
      <c r="H96" s="9" />
      <c r="I96" s="9">
        <v>0</v>
      </c>
      <c r="J96" s="10">
        <v>0</v>
      </c>
      <c r="K96" s="11" />
      <c r="L96" s="10" />
      <c r="M96" s="11">
        <v>0</v>
      </c>
      <c r="N96" s="11">
        <v>0</v>
      </c>
      <c r="O96" s="12">
        <v>63</v>
      </c>
      <c r="P96" s="8" t="s">
        <v>17</v>
      </c>
    </row>
    <row r="97" spans="2:16" ht="15" customHeight="true">
      <c r="B97" s="6" t="s">
        <v>113</v>
      </c>
      <c r="C97" s="7" t="s">
        <v>16</v>
      </c>
      <c r="D97" s="8" t="s">
        <v>17</v>
      </c>
      <c r="E97" s="8" t="s">
        <v>18</v>
      </c>
      <c r="F97" s="8" t="s">
        <v>17</v>
      </c>
      <c r="G97" s="8" t="s">
        <v>17</v>
      </c>
      <c r="H97" s="9" />
      <c r="I97" s="9">
        <v>0</v>
      </c>
      <c r="J97" s="10">
        <v>0</v>
      </c>
      <c r="K97" s="11" />
      <c r="L97" s="10" />
      <c r="M97" s="11">
        <v>0</v>
      </c>
      <c r="N97" s="11">
        <v>0</v>
      </c>
      <c r="O97" s="12">
        <v>63</v>
      </c>
      <c r="P97" s="8" t="s">
        <v>17</v>
      </c>
    </row>
  </sheetData>
  <printOptions headings="true" gridLines="true" />
  <pageMargins left="0" right="0" top="0" bottom="0" header="0" footer="0" />
  <pageSetup paperSize="0" scale="0" pageOrder="overThenDown" orientation="portrait" blackAndWhite="true" useFirstPageNumber="true" />
  <headerFooter />
</worksheet>
