# Supplementary material for: PLA2G16 expression predicts prognosis and gemcitabine sensitivity in patients with pancreatic cancer
Source: PeerJ journal article supplement (doi:10.7717/peerj.19517), 2025-05-30
Supplement: FIG3B3I.zip [file BxPC-3 IC50.xlsx]

## Sheet: 吸光度 1_01
检测结果
新程序 (718)
2025/2/21 17:27:44
吸光度 1
波长: 450 nm
板 1
吸光值	1	2	3	4	5	6	7	8	9	10	11	12
A	0.0421	0.0433	0.0442	0.042	0.0416	0.0405	0.0643	0.0426	0.0403	0.0438	0.0421	0.0431
B	0.1154	0.7613	0.7202	0.6853	0.631	0.4642	0.4668	0.4166	0.4001	0.3645	0.3472	0.0402
C	0.114	0.8688	0.6645	0.6456	0.647	0.4912	0.4053	0.4293	0.4055	0.3741	0.3308	0.0403
D	0.1115	0.9573	0.7109	0.7075	0.6299	0.4341	0.4312	0.4721	0.2907	0.3774	0.3269	0.0403
E	0.1119	0.9408	0.6933	0.6518	0.6079	0.4339	0.4152	0.4272	0.431	0.3415	0.3315	0.0408
F	0.112	0.955	0.7227	0.6853	0.6419	0.4175	0.4213	0.4203	0.3973	0.3355	0.3258	0.0402
G	0.07	0.0431	0.0447	0.0588	0.0435	0.0461	0.0581	0.0413	0.0415	0.041	0.0415	0.0411
H	0.0496	0.0498	0.0498	0.053	0.0503	0.0498	0.0493	0.0491	0.0495	0.0492	0.0493	0.0489
样本	1	2	3	4	5	6	7	8	9	10	11	12
A
B
C
D
E
F
G
H
