# Supplementary material for: PLA2G16 expression predicts prognosis and gemcitabine sensitivity in patients with pancreatic cancer
Source: PeerJ journal article supplement (doi:10.7717/peerj.19517), 2025-05-30
Supplement: FIG3B3I.zip [file BxPC-3GR IC50.xlsx]

## Sheet: 吸光度 1_01
检测结果
新程序 (719)
2025/2/21 17:31:56
吸光度 1
波长: 450 nm
板 1
吸光值	1	2	3	4	5	6	7	8	9	10	11	12
A	0.0434	0.0399	0.0404	0.0392	0.0401	0.0399	0.0396	0.0396	0.0392	0.0398	0.0408	0.0432
B	0.1181	0.9168	0.8937	0.8539	0.8627	0.8314	0.806	0.8001	0.7353	0.6167	0.116	0.0389
C	0.1074	0.8823	0.8044	0.8259	0.7691	0.744	0.7336	0.7153	0.6901	0.598	0.1149	0.0486
D	0.1097	0.8758	0.8007	0.7827	0.7984	0.7712	0.729	0.6894	0.6528	0.6234	0.1265	0.0398
E	0.1312	0.9043	0.7997	0.7901	0.7766	0.7684	0.7395	0.7233	0.6677	0.6224	0.1245	0.0394
F	0.1144	0.9222	0.8378	0.8482	0.7915	0.7977	0.7526	0.7378	0.6973	0.6294	0.1137	0.0415
G	0.0404	0.0408	0.0411	0.044	0.04	0.0423	0.0402	0.0403	0.0406	0.0403	0.0398	0.0396
H	0.0565	0.0589	0.0516	0.049	0.0489	0.0517	0.0483	0.0485	0.0537	0.0487	0.0489	0.0484
样本	1	2	3	4	5	6	7	8	9	10	11	12
A
B
C
D
E
F
G
H
