# Supplementary material for: PLA2G16 expression predicts prognosis and gemcitabine sensitivity in patients with pancreatic cancer
Source: PeerJ journal article supplement (doi:10.7717/peerj.19517), 2025-05-30
Supplement: FIG3B3I.zip [file NC.xlsx]

## Sheet: 吸光度 1_01
检测结果
新程序 (252)
2024/4/3 15:36:49
吸光度 1
波长: 450 nm
板 1
吸光值	1	2	3	4	5	6	7	8	9	10	11	12
A	0.0522	0.0431	0.0408	0.0461	0.0447	0.0444	0.0441	0.0456	0.0465	0.0429	0.0444	0.0658
B	0.1383	1.6374	1.4917	1.4254	1.2855	1.0811	0.9901	0.9089	0.8489	0.8037	0.0414	0.0535
C	0.1358	1.6462	1.4521	1.3681	1.2126	1.0324	0.8861	0.8561	0.8232	0.7588	0.0409	0.0549
D	0.1318	1.64	1.4469	1.3486	1.1735	1.0269	0.947	0.8385	0.8123	0.7479	0.0408	0.0552
E	0.1329	1.6236	1.459	1.374	1.2096	1.067	0.9406	0.8431	0.8224	0.7693	0.0426	0.0595
F	0.1338	1.6496	1.4885	1.4172	1.2593	1.1324	0.9647	0.8754	0.8288	0.7425	0.0404	0.055
G	0.0452	0.045	0.043	0.0428	0.0422	0.0415	0.0421	0.0409	0.041	0.0427	0.0417	0.0538
H	0.0629	0.0533	0.0533	0.0565	0.0559	0.0592	0.0552	0.0561	0.0543	0.055	0.0527	0.0611
样本	1	2	3	4	5	6	7	8	9	10	11	12
A
B
C				0.1383	0.1358	0.1318	0.1329	0.1338	0.13452	0.00257235
D				1.6374	1.6462	1.64	1.6236	1.6496	1.63936	0.0100533
E				1.4917	1.4521	1.4469	1.459	1.4885	1.46764	0.020978	0.114112
F				1.4254	1.3681	1.3486	1.374	1.4172	1.38666	0.0331164	0.167925
G				1.2855	1.2126	1.1735	1.2096	1.2593	1.2281	0.0442489	0.273292
H				1.0811	1.0324	1.0269	1.067	1.1324	1.06796	0.0426513	0.379708
				0.9901	0.8861	0.947	0.9406	0.9647	0.9457	0.0384455	0.460953
				0.9089	0.8561	0.8385	0.8431	0.8754	0.8644	0.0286995	0.514978
				0.8489	0.8232	0.8123	0.8224	0.8288	0.82712	0.0135505	0.539752
				0.8037	0.7588	0.7479	0.7693	0.7425	0.76444	0.0242472	0.581404
