# Supplementary material for: PLA2G16 expression predicts prognosis and gemcitabine sensitivity in patients with pancreatic cancer
Source: PeerJ journal article supplement (doi:10.7717/peerj.19517), 2025-05-30
Supplement: FIG3B3I.zip [file PANC-1 IC50.xlsx]

## Sheet: 吸光度 1_01
检测结果
新程序 (717)
2025/2/21 17:26:44
吸光度 1
波长: 450 nm
板 1
吸光值	1	2	3	4	5	6	7	8	9	10	11	12
A	0.0419	0.0412	0.0426	0.0439	0.0409	0.0421	0.0409	0.0411	0.0407	0.04	0.0427	0.0424
B	0.1072	1.2366	0.8943	0.8274	0.7322	0.6791	0.6216	0.5766	0.5162	0.4363	0.3818	0.0398
C	0.1129	1.2331	0.8528	0.7978	0.7185	0.6913	0.6547	0.6094	0.5289	0.3757	0.3818	0.0425
D	0.1352	1.1978	0.8527	0.8032	0.773	0.6901	0.6488	0.5927	0.4923	0.4261	0.3725	0.0409
E	0.1103	1.2299	0.8374	0.7884	0.7575	0.6518	0.6246	0.6035	0.4906	0.4316	0.3271	0.0404
F	0.1078	1.1737	0.9139	0.8014	0.7162	0.6747	0.6151	0.5919	0.4856	0.4564	0.3457	0.0401
G	0.043	0.043	0.0408	0.0437	0.0432	0.0422	0.0404	0.0409	0.042	0.0429	0.0404	0.039
H	0.0517	0.0497	0.0496	0.0648	0.0542	0.0495	0.0493	0.0538	0.0531	0.0555	0.0609	0.0505
样本	1	2	3	4	5	6	7	8	9	10	11	12
A
B
C
D
E
F
G
H
