# Supplementary material for: PLA2G16 expression predicts prognosis and gemcitabine sensitivity in patients with pancreatic cancer
Source: PeerJ journal article supplement (doi:10.7717/peerj.19517), 2025-05-30
Supplement: FIG3B3I.zip [file PANC-1GR IC50.xlsx]

## Sheet: 吸光度 1_01
检测结果
新程序 (684)
2025/2/17 15:59:46
吸光度 1
波长: 450 nm
板 1
吸光值	1	2	3	4	5	6	7	8	9	10	11	12
A	0.0411	0.0421	0.041	0.0393	0.0418	0.0404	0.0397	0.0397	0.0399	0.0396	0.0412	0.0392
B	0.1167	0.9787	0.9266	0.904	0.9168	0.8895	0.8274	0.8552	0.8009	0.5845	0.3933	0.039
C	0.1122	0.9227	0.8944	0.8729	0.8553	0.7975	0.85	0.7614	0.7393	0.6038	0.4714	0.0394
D	0.1116	0.9787	0.8793	0.8611	0.8716	0.799	0.7724	0.7702	0.7379	0.5845	0.465	0.0398
E	0.112	0.9567	0.8614	0.9015	0.8682	0.808	0.8094	0.7821	0.7099	0.5101	0.4685	0.0423
F	0.1152	0.9554	0.9567	0.9362	0.9356	0.8761	0.8237	0.8163	0.6626	0.4998	0.4387	0.0425
G	0.0397	0.0402	0.0411	0.0413	0.0432	0.0432	0.0407	0.0468	0.0424	0.0407	0.0493	0.0433
H	0.0502	0.0491	0.0497	0.0539	0.0524	0.049	0.0503	0.0486	0.0492	0.0491	0.0628	0.0495
样本	1	2	3	4	5	6	7	8	9	10	11	12
A
B
C
D
E
F
G
H
