# Supplementary material for: PLA2G16 expression predicts prognosis and gemcitabine sensitivity in patients with pancreatic cancer
Source: PeerJ journal article supplement (doi:10.7717/peerj.19517), 2025-05-30
Supplement: FIG_1.zip [file FIG 1E.pdf › FIG 1/FIG 1E.pdf]

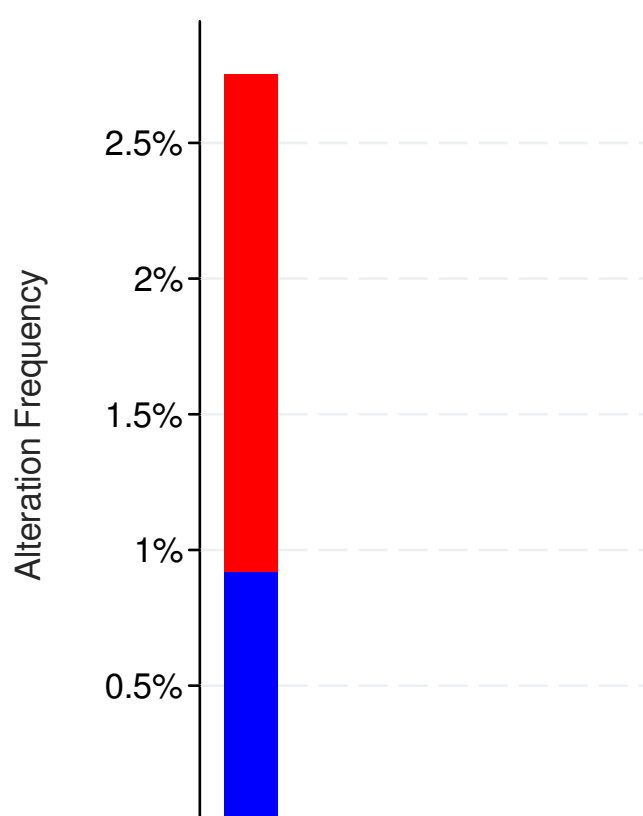

|                         |   |   |   |   |   |   |
|-------------------------|---|---|---|---|---|---|
| Structural variant data | - | - | - | - | + | - |
| Mutation data           | + | + | + | + | + | + |
| CNA data                | + | - | - | + | + | - |

Pancreatic Ductal Adenocarcinoma (CPTAC, Cell 2021)  
Pancreatic Adenocarcinoma (TCGA, PanCancer Atlas)  
Pancreatic Adenocarcinoma (TCGA, Firehose Legacy)  
Pancreatic Adenocarcinoma (QCMG, Nature 2012)  
Pancreatic Adenocarcinoma (ICGC, Nature 2015)  
Pancreatic Cancer (UTSW, Nat Commun 2015)

● Amplification      ● Deep Deletion
