# Supplementary material for: PLA2G16 expression predicts prognosis and gemcitabine sensitivity in patients with pancreatic cancer
Source: PeerJ journal article supplement (doi:10.7717/peerj.19517), 2025-05-30
Supplement: FIG_2.zip [file coxdate.xlsx]

## Sheet: coxdate
PATIENT_ID	time	status	age	gender	grade	PLA2G16
TCGA.2J.AAB1	2.16984	1	65	1	2	4.96647
TCGA.2J.AAB4	23.9669	0	48	1	2	5.49628
TCGA.3A.A9IL	90.1141	0	39	2	1	3.91238
TCGA.3A.A9IH	33.5668	0	66	2	1	5.52426
TCGA.3A.A9IX	34.0928	0	40	1	1	4.8367
TCGA.FB.AAQ6	8.02183	1	85	1	1	5.08677
TCGA.HZ.8519	14.9259	0	73	1	1	4.53842
TCGA.HZ.8638	4.96433	1	84	2	1	4.43216
TCGA.3A.A9IJ	60.9528	0	65	1	1	5.03036
TCGA.3A.A9IN	68.5143	0	62	2	1	3.71683
TCGA.3A.A9IR	50.6953	0	64	2	1	1.98783
TCGA.3A.A9IS	32.8106	0	67	1	1	3.84385
TCGA.3A.A9IV	36.2626	0	59	2	1	3.85792
TCGA.FB.A5VM	16.3724	1	74	1	1	4.77802
TCGA.HZ.7920	7.75882	1	71	1	1	4.35241
TCGA.HZ.A8P1	0.230134	0	81	1	1	4.41595
TCGA.IB.7890	19.6601	1	73	1	1	5.16727
TCGA.IB.A5SQ	7.19992	1	56	2	1	5.51847
TCGA.IB.AAUN	4.73419	1	74	2	1	5.63948
TCGA.Q3.AA2A	3.12325	0	64	2	1	5.74019
TCGA.RL.AAAS	0.295887	0	60	2	1	4.48422
TCGA.XN.A8T3	31.2654	0	67	1	1	4.52682
TCGA.XN.A8T5	23.671	0	53	2	1	5.13935
TCGA.2J.AAB6	9.63277	1	75	1	2	5.39397
TCGA.2J.AABE	22.2244	0	73	1	2	5.20749
TCGA.2J.AABH	42.3119	0	61	1	2	5.25687
TCGA.2J.AABI	31.8572	0	55	2	2	4.33205
TCGA.2J.AABR	14.3998	0	60	2	2	4.27387
TCGA.3A.A9I9	20.8436	1	67	1	2	4.84512
TCGA.3E.AAAZ	71.7362	1	71	1	2	4.07379
TCGA.F2.A44H	19.2655	0	65	1	2	2.904
TCGA.F2.A8YN	16.9971	0	76	1	2	5.05553
TCGA.FB.A7DR	11.6054	1	48	1	2	4.57906
TCGA.FB.AAPU	12.5259	1	41	2	2	4.68255
TCGA.FB.AAQ0	15.5505	1	68	1	2	6.08077
TCGA.H8.A6C1	22.06	0	53	1	2	4.85634
TCGA.HV.A5A3	4.20817	1	50	1	2	5.0904
TCGA.HV.A5A4	7.62731	0	72	2	2	5.27276
TCGA.HV.A7OL	8.28484	0	70	1	2	6.34199
TCGA.HZ.7923	10.3232	0	65	1	2	4.40255
TCGA.HZ.7924	27.6161	0	60	2	2	4.22886
TCGA.HZ.8315	9.83003	1	54	2	2	6.49182
TCGA.IB.7888	43.7913	1	66	2	2	4.29224
TCGA.IB.7893	3.84653	1	64	1	2	6.30017
TCGA.IB.A5SP	15.8464	0	77	1	2	6.12059
TCGA.LB.A8F3	12.4601	0	64	2	2	3.85057
TCGA.M8.A5N4	19.1998	0	48	2	2	5.79742
TCGA.OE.A75W	8.77799	1	75	1	2	5.8148
TCGA.US.A776	39.9776	0	61	1	2	2.61113
TCGA.XD.AAUL	16.3724	0	56	1	2	5.96929
TCGA.Z5.AAPL	15.3533	0	74	2	2	4.34094
TCGA.2J.AAB8	2.63011	0	71	1	2	4.64851
TCGA.2J.AAB9	20.6135	1	70	2	2	4.93717
TCGA.2J.AABA	19.9559	1	55	1	2	5.85583
TCGA.2J.AABF	22.7176	1	73	1	2	4.68655
TCGA.2J.AABK	15.9122	0	71	1	2	4.42125
TCGA.2J.AABO	14.4656	0	43	1	2	5.43022
TCGA.2J.AABP	15.2218	0	58	2	2	2.71728
TCGA.2J.AABT	10.4876	0	72	2	2	4.61643
TCGA.2J.AABU	9.10675	1	56	1	2	6.75321
TCGA.2J.AABV	21.4354	1	74	1	2	3.98045
TCGA.2L.AAQA	4.70132	1	76	1	2	4.34958
TCGA.2L.AAQE	22.4874	1	56	1	2	7.19146
TCGA.2L.AAQI	3.38626	1	66	1	2	5.82402
TCGA.2L.AAQL	9.59989	1	82	1	2	4.55829
TCGA.2L.AAQM	45.468	0	52	1	2	3.5065
TCGA.3A.A9I7	43.4954	0	45	1	2	4.14875
TCGA.3A.A9IB	7.3643	1	69	2	2	6.27606
TCGA.3A.A9IC	24.2627	1	61	2	2	5.21662
TCGA.3A.A9IU	15.0574	1	65	1	2	6.43788
TCGA.3A.A9IZ	10.1259	1	47	1	2	5.50445
TCGA.3A.A9J0	24.4271	0	75	1	2	6.23079
TCGA.3E.AAAY	75.1225	0	67	1	2	4.859
TCGA.F2.6879	10.9807	1	57	1	2	5.55413
TCGA.F2.6880	9.69852	0	70	1	2	2.57165
TCGA.F2.7273	19.4628	1	54	1	2	3.76382
TCGA.F2.7276	7.10129	1	64	1	2	4.03094
TCGA.F2.A44G	7.66019	1	79	2	2	5.81776
TCGA.F2.A7TX	3.12325	1	77	1	2	5.78854
TCGA.FB.A4P5	5.88487	1	69	2	2	5.15064
TCGA.FB.A4P6	25.2162	0	54	1	2	4.40315
TCGA.FB.A545	24.0655	1	72	2	2	6.60116
TCGA.FB.A78T	12.3286	1	71	2	2	3.45843
TCGA.FB.AAPP	15.945	1	71	1	2	2.64039
TCGA.FB.AAPQ	37.1503	1	65	1	2	3.90008
TCGA.FB.AAPS	7.49581	0	62	2	2	4.57243
TCGA.FB.AAPY	34.8161	1	71	1	2	6.2203
TCGA.FB.AAPZ	23.5395	0	54	1	2	5.25318
TCGA.FB.AAQ1	4.04379	1	49	1	2	5.69244
TCGA.FB.AAQ2	5.03008	1	81	2	2	5.71148
TCGA.FB.AAQ3	1.01917	1	65	2	2	6.41512
TCGA.H6.8124	12.8875	0	56	2	2	6.56379
TCGA.H6.A45N	13.8409	1	88	2	2	4.90783
TCGA.HV.A5A5	9.50127	0	61	2	2	4.03444
TCGA.HV.A5A6	66.9363	1	65	2	2	6.42354
TCGA.HV.A7OP	32.1531	0	72	1	2	5.17274
TCGA.HV.AA8V	30.2462	0	50	1	2	4.63349
TCGA.HV.AA8X	17.4902	1	75	2	2	5.09447
TCGA.HZ.7289	21.7313	1	77	1	2	1.83911
TCGA.HZ.7918	31.8572	0	72	1	2	3.82469
TCGA.HZ.7919	19.4957	1	52	2	2	6.14574
TCGA.HZ.7922	0.131505	0	61	2	2	5.38354
TCGA.HZ.7925	20.1861	1	66	1	2	4.95495
TCGA.HZ.7926	17.03	1	57	1	2	5.21284
TCGA.HZ.8002	12.0327	1	61	1	2	4.86047
TCGA.HZ.8003	19.5943	1	65	2	2	3.96557
TCGA.HZ.8005	3.94516	1	81	1	2	4.88274
TCGA.HZ.8317	12.4273	1	69	2	2	3.91683
TCGA.HZ.8637	16.9971	1	76	2	2	5.0624
TCGA.HZ.A49G	21.6984	0	58	2	2	4.35416
TCGA.HZ.A49H	16.1423	0	68	2	2	4.12572
TCGA.HZ.A49I	10.1259	1	77	1	2	5.16415
TCGA.HZ.A4BH	6.37801	0	75	1	2	6.26933
TCGA.HZ.A4BK	21.5998	0	72	1	2	4.89223
TCGA.HZ.A77O	5.26022	1	77	2	2	5.28091
TCGA.HZ.A77P	10.8492	0	77	1	2	4.17777
TCGA.HZ.A77Q	1.08492	0	55	2	2	5.64374
TCGA.IB.7645	49.3803	1	44	2	2	4.34193
TCGA.IB.7646	4.76707	1	60	1	2	4.76925
TCGA.IB.7647	21.8957	1	41	1	2	4.57723
TCGA.IB.7649	15.3533	1	73	2	2	4.98014
TCGA.IB.7651	19.8244	1	64	2	2	4.93719
TCGA.IB.7652	36.69	0	49	2	2	4.4584
TCGA.IB.7885	41.3256	0	78	2	2	4.85883
TCGA.IB.7886	4.04379	1	80	1	2	5.61555
TCGA.IB.7887	3.6164	1	62	2	2	5.2827
TCGA.IB.7889	15.8135	1	85	2	2	5.51372
TCGA.IB.7891	30.0161	1	49	2	2	4.87123
TCGA.IB.7897	15.9779	1	53	2	2	4.70515
TCGA.IB.8127	17.1615	0	59	1	2	5.12512
TCGA.IB.A5SO	11.9999	1	71	1	2	4.55585
TCGA.IB.A5SS	15.1231	1	64	2	2	5.78013
TCGA.IB.A5ST	20.8765	0	64	2	2	4.92867
TCGA.IB.A6UF	21.8957	0	63	1	2	4.84851
TCGA.IB.A6UG	1.34793	1	65	1	2	6.66287
TCGA.IB.A7LX	8.21909	1	57	1	2	5.54325
TCGA.IB.A7M4	15.8793	0	81	1	2	6.13557
TCGA.IB.AAUM	0.263011	0	76	1	2	3.32609
TCGA.IB.AAUO	7.85745	1	64	2	2	5.64092
TCGA.IB.AAUP	14.1697	0	68	1	2	4.5073
TCGA.IB.AAUQ	6.01637	1	50	1	2	5.69899
TCGA.IB.AAUR	11.1122	0	67	1	2	3.72009
TCGA.IB.AAUS	7.39718	0	84	2	2	4.34803
TCGA.IB.AAUT	9.43551	0	65	1	2	4.073
TCGA.IB.AAUU	8.05471	0	35	1	2	6.23939
TCGA.IB.AAUV	13.282	0	49	1	2	4.04212
TCGA.IB.AAUW	7.56156	1	63	2	2	3.9394
TCGA.L1.A7W4	9.13963	1	48	2	2	6.5316
TCGA.LB.A7SX	12.9204	1	74	2	2	5.99558
TCGA.LB.A9Q5	10.2903	1	63	2	2	3.92345
TCGA.PZ.A5RE	15.4519	1	44	2	2	5.79421
TCGA.Q3.A5QY	13.6766	0	58	1	2	4.96998
TCGA.RB.A7B8	15.3204	1	81	2	2	4.36955
TCGA.RB.AA9M	9.40264	0	43	1	2	6.24979
TCGA.S4.A8RM	24.2299	0	67	1	2	4.19787
TCGA.S4.A8RO	17.2601	0	75	2	2	3.77073
TCGA.S4.A8RP	23.0792	1	77	2	2	4.39976
TCGA.US.A774	22.8491	1	76	2	2	4.94888
TCGA.US.A779	16.7998	1	54	2	2	6.15822
TCGA.US.A77E	14.1368	1	73	1	2	5.05477
TCGA.US.A77G	0.394516	1	64	1	2	4.54696
TCGA.US.A77J	18.6738	1	81	2	2	4.24807
TCGA.XD.AAUH	12.9862	0	57	2	2	5.11648
TCGA.XD.AAUI	12.0327	1	50	2	2	6.76322
TCGA.YB.A89D	11.5067	0	59	1	2	4.87871
TCGA.YY.A8LH	66.2787	0	61	2	2	5.95999
TCGA.2L.AAQJ	12.9533	1	49	2	3	5.60102
TCGA.HZ.8001	23.2107	0	69	1	3	5.46499
TCGA.IB.8126	15.1889	0	79	2	3	3.59503
TCGA.YH.A8SY	12.756	0	73	2	3	4.93625
TCGA.HZ.8636	17.9176	1	58	2	4	4.89465
TCGA.HZ.A9TJ	19.8244	0	70	1	4	5.37631
TCGA.IB.7644	12.9533	1	65	2	4	5.47814
TCGA.XD.AAUG	13.8081	0	66	2	4	4.14162
