# Supplementary material for: PLA2G16 expression predicts prognosis and gemcitabine sensitivity in patients with pancreatic cancer
Source: PeerJ journal article supplement (doi:10.7717/peerj.19517), 2025-05-30
Supplement: FIG_4AEditorial.zip [file dat_group.xlsx]

## Sheet: dat_group
	Samples	Groups
TCGA.FB.AAPY.01A.11R.A41B.07	TCGA.FB.AAPY.01A.11R.A41B.07	highexpression
TCGA.IB.A7LX.01A.12R.A36G.07	TCGA.IB.A7LX.01A.12R.A36G.07	highexpression
TCGA.3A.A9IX.01A.11R.A41B.07	TCGA.3A.A9IX.01A.11R.A41B.07	lowexpression
TCGA.2J.AAB4.01A.12R.A41B.07	TCGA.2J.AAB4.01A.12R.A41B.07	highexpression
TCGA.3A.A9IH.01A.12R.A39D.07	TCGA.3A.A9IH.01A.12R.A39D.07	highexpression
TCGA.IB.AAUO.01A.12R.A38C.07	TCGA.IB.AAUO.01A.12R.A38C.07	highexpression
TCGA.HZ.A77O.01A.11R.A33R.07	TCGA.HZ.A77O.01A.11R.A33R.07	highexpression
TCGA.IB.8126.01A.11R.2404.07	TCGA.IB.8126.01A.11R.2404.07	lowexpression
TCGA.IB.AAUS.01A.12R.A38C.07	TCGA.IB.AAUS.01A.12R.A38C.07	lowexpression
TCGA.3E.AAAZ.01A.11R.A38C.07	TCGA.3E.AAAZ.01A.11R.A38C.07	lowexpression
TCGA.HZ.8001.01A.11R.2204.07	TCGA.HZ.8001.01A.11R.2204.07	highexpression
TCGA.S4.A8RO.01A.12R.A37L.07	TCGA.S4.A8RO.01A.12R.A37L.07	lowexpression
TCGA.IB.7889.01A.11R.2156.07	TCGA.IB.7889.01A.11R.2156.07	highexpression
TCGA.FB.AAPP.01A.12R.A41B.07	TCGA.FB.AAPP.01A.12R.A41B.07	lowexpression
TCGA.FB.A4P6.01A.12R.A26U.07	TCGA.FB.A4P6.01A.12R.A26U.07	lowexpression
TCGA.IB.A5SO.01A.11R.A32O.07	TCGA.IB.A5SO.01A.11R.A32O.07	lowexpression
TCGA.2J.AABR.01A.11R.A41B.07	TCGA.2J.AABR.01A.11R.A41B.07	lowexpression
TCGA.XD.AAUL.01A.21R.A39D.07	TCGA.XD.AAUL.01A.21R.A39D.07	highexpression
TCGA.F2.A8YN.01A.11R.A37L.07	TCGA.F2.A8YN.01A.11R.A37L.07	highexpression
TCGA.2J.AABE.01A.12R.A41B.07	TCGA.2J.AABE.01A.12R.A41B.07	highexpression
TCGA.2J.AAB8.01A.12R.A41B.07	TCGA.2J.AAB8.01A.12R.A41B.07	lowexpression
TCGA.US.A774.01A.21R.A32O.07	TCGA.US.A774.01A.21R.A32O.07	highexpression
TCGA.IB.AAUV.01A.11R.A38C.07	TCGA.IB.AAUV.01A.11R.A38C.07	lowexpression
TCGA.FB.A5VM.01A.11R.A32O.07	TCGA.FB.A5VM.01A.11R.A32O.07	lowexpression
TCGA.3A.A9I7.01A.21R.A38C.07	TCGA.3A.A9I7.01A.21R.A38C.07	lowexpression
TCGA.IB.8127.01A.11R.2404.07	TCGA.IB.8127.01A.11R.2404.07	highexpression
TCGA.IB.AAUU.01A.11R.A37L.07	TCGA.IB.AAUU.01A.11R.A37L.07	highexpression
TCGA.IB.7651.01A.11R.2156.07	TCGA.IB.7651.01A.11R.2156.07	highexpression
TCGA.S4.A8RP.01A.11R.A36G.07	TCGA.S4.A8RP.01A.11R.A36G.07	lowexpression
TCGA.HV.AA8X.01A.11R.A39D.07	TCGA.HV.AA8X.01A.11R.A39D.07	highexpression
TCGA.2J.AABV.01A.12R.A41B.07	TCGA.2J.AABV.01A.12R.A41B.07	lowexpression
TCGA.2J.AABO.01A.21R.A41B.07	TCGA.2J.AABO.01A.21R.A41B.07	highexpression
TCGA.2J.AAB9.01A.11R.A41B.07	TCGA.2J.AAB9.01A.11R.A41B.07	highexpression
TCGA.LB.A9Q5.01A.11R.A39D.07	TCGA.LB.A9Q5.01A.11R.A39D.07	lowexpression
TCGA.F2.A44G.01A.11R.A26U.07	TCGA.F2.A44G.01A.11R.A26U.07	highexpression
TCGA.IB.AAUT.01A.11R.A37L.07	TCGA.IB.AAUT.01A.11R.A37L.07	lowexpression
TCGA.F2.6880.01A.11R.2156.07	TCGA.F2.6880.01A.11R.2156.07	lowexpression
TCGA.LB.A7SX.01A.11R.A33R.07	TCGA.LB.A7SX.01A.11R.A33R.07	highexpression
TCGA.2L.AAQA.01A.21R.A38C.07	TCGA.2L.AAQA.01A.21R.A38C.07	lowexpression
TCGA.HZ.7918.01A.11R.2156.07	TCGA.HZ.7918.01A.11R.2156.07	lowexpression
TCGA.2J.AABT.01A.11R.A41B.07	TCGA.2J.AABT.01A.11R.A41B.07	lowexpression
TCGA.XD.AAUH.01A.42R.A41B.07	TCGA.XD.AAUH.01A.42R.A41B.07	highexpression
TCGA.HZ.7924.01A.11R.2156.07	TCGA.HZ.7924.01A.11R.2156.07	lowexpression
TCGA.3A.A9IC.01A.11R.A38C.07	TCGA.3A.A9IC.01A.11R.A38C.07	highexpression
TCGA.FB.A545.01A.11R.A26U.07	TCGA.FB.A545.01A.11R.A26U.07	highexpression
TCGA.XD.AAUI.01A.42R.A41B.07	TCGA.XD.AAUI.01A.42R.A41B.07	highexpression
TCGA.IB.7891.01A.11R.2204.07	TCGA.IB.7891.01A.11R.2204.07	lowexpression
TCGA.3A.A9IU.01A.11R.A39D.07	TCGA.3A.A9IU.01A.11R.A39D.07	highexpression
TCGA.2L.AAQI.01A.12R.A39D.07	TCGA.2L.AAQI.01A.12R.A39D.07	highexpression
TCGA.3A.A9J0.01A.11R.A41B.07	TCGA.3A.A9J0.01A.11R.A41B.07	highexpression
TCGA.H8.A6C1.01A.11R.A32O.07	TCGA.H8.A6C1.01A.11R.A32O.07	lowexpression
TCGA.IB.7645.01A.22R.2204.07	TCGA.IB.7645.01A.22R.2204.07	lowexpression
TCGA.IB.7885.01A.11R.2156.07	TCGA.IB.7885.01A.11R.2156.07	lowexpression
TCGA.HZ.A49G.01A.11R.A26U.07	TCGA.HZ.A49G.01A.11R.A26U.07	lowexpression
TCGA.FB.AAQ6.01A.11R.A41B.07	TCGA.FB.AAQ6.01A.11R.A41B.07	highexpression
TCGA.IB.7647.01A.11R.2156.07	TCGA.IB.7647.01A.11R.2156.07	lowexpression
TCGA.RB.AA9M.01A.11R.A39D.07	TCGA.RB.AA9M.01A.11R.A39D.07	highexpression
TCGA.F2.6879.01A.11R.2156.07	TCGA.F2.6879.01A.11R.2156.07	highexpression
TCGA.XD.AAUG.01A.61R.A41B.07	TCGA.XD.AAUG.01A.61R.A41B.07	lowexpression
TCGA.IB.A6UF.01A.23R.A33R.07	TCGA.IB.A6UF.01A.23R.A33R.07	lowexpression
TCGA.HZ.7923.01A.12R.2156.07	TCGA.HZ.7923.01A.12R.2156.07	lowexpression
TCGA.HZ.A49H.01A.11R.A26U.07	TCGA.HZ.A49H.01A.11R.A26U.07	lowexpression
TCGA.S4.A8RM.01A.11R.A37L.07	TCGA.S4.A8RM.01A.11R.A37L.07	lowexpression
TCGA.HV.AA8V.01A.11R.A41B.07	TCGA.HV.AA8V.01A.11R.A41B.07	lowexpression
TCGA.IB.A5SP.01A.11R.A32O.07	TCGA.IB.A5SP.01A.11R.A32O.07	highexpression
TCGA.OE.A75W.01A.12R.A32O.07	TCGA.OE.A75W.01A.12R.A32O.07	highexpression
TCGA.IB.7888.01A.11R.2156.07	TCGA.IB.7888.01A.11R.2156.07	lowexpression
TCGA.LB.A8F3.01A.11R.A36G.07	TCGA.LB.A8F3.01A.11R.A36G.07	lowexpression
TCGA.HZ.A9TJ.01A.11R.A41I.07	TCGA.HZ.A9TJ.01A.11R.A41I.07	highexpression
TCGA.IB.AAUW.01A.12R.A38C.07	TCGA.IB.AAUW.01A.12R.A38C.07	lowexpression
TCGA.2J.AABU.01A.11R.A41B.07	TCGA.2J.AABU.01A.11R.A41B.07	highexpression
TCGA.IB.7644.01A.11R.2156.07	TCGA.IB.7644.01A.11R.2156.07	highexpression
TCGA.2J.AAB1.01A.11R.A41B.07	TCGA.2J.AAB1.01A.11R.A41B.07	highexpression
TCGA.Q3.A5QY.01A.12R.A32O.07	TCGA.Q3.A5QY.01A.12R.A32O.07	highexpression
TCGA.HV.A5A6.01A.11R.A26U.07	TCGA.HV.A5A6.01A.11R.A26U.07	highexpression
TCGA.IB.7652.01A.11R.2156.07	TCGA.IB.7652.01A.11R.2156.07	lowexpression
TCGA.3E.AAAY.01A.11R.A38C.07	TCGA.3E.AAAY.01A.11R.A38C.07	lowexpression
TCGA.2J.AABH.01A.21R.A41B.07	TCGA.2J.AABH.01A.21R.A41B.07	highexpression
TCGA.3A.A9IZ.01A.12R.A41B.07	TCGA.3A.A9IZ.01A.12R.A41B.07	highexpression
TCGA.F2.7273.01A.11R.2156.07	TCGA.F2.7273.01A.11R.2156.07	lowexpression
TCGA.IB.A5SS.01A.11R.A32O.07	TCGA.IB.A5SS.01A.11R.A32O.07	highexpression
TCGA.FB.AAPZ.01A.11R.A41B.07	TCGA.FB.AAPZ.01A.11R.A41B.07	highexpression
TCGA.L1.A7W4.01A.12R.A36G.07	TCGA.L1.A7W4.01A.12R.A36G.07	highexpression
TCGA.F2.A44H.01A.11R.A26U.07	TCGA.F2.A44H.01A.11R.A26U.07	lowexpression
TCGA.HV.A7OP.01A.11R.A33R.07	TCGA.HV.A7OP.01A.11R.A33R.07	highexpression
TCGA.2J.AABP.01A.11R.A41B.07	TCGA.2J.AABP.01A.11R.A41B.07	lowexpression
TCGA.YB.A89D.01A.12R.A36G.07	TCGA.YB.A89D.01A.12R.A36G.07	highexpression
TCGA.HZ.A77P.01A.11R.A33R.07	TCGA.HZ.A77P.01A.11R.A33R.07	lowexpression
TCGA.HZ.8637.01A.11R.2404.07	TCGA.HZ.8637.01A.11R.2404.07	highexpression
TCGA.PZ.A5RE.01A.11R.A32O.07	TCGA.PZ.A5RE.01A.11R.A32O.07	highexpression
TCGA.2L.AAQJ.01A.12R.A39D.07	TCGA.2L.AAQJ.01A.12R.A39D.07	highexpression
TCGA.F2.7276.01A.11R.2156.07	TCGA.F2.7276.01A.11R.2156.07	lowexpression
TCGA.H6.8124.01A.11R.2404.07	TCGA.H6.8124.01A.11R.2404.07	highexpression
TCGA.2J.AABF.01A.31R.A41B.07	TCGA.2J.AABF.01A.31R.A41B.07	lowexpression
TCGA.3A.A9I5.01A.11R.A38C.07	TCGA.3A.A9I5.01A.11R.A38C.07	highexpression
TCGA.HZ.8317.01A.11R.2404.07	TCGA.HZ.8317.01A.11R.2404.07	lowexpression
TCGA.RB.A7B8.01A.12R.A33R.07	TCGA.RB.A7B8.01A.12R.A33R.07	lowexpression
TCGA.FB.A78T.01A.12R.A32O.07	TCGA.FB.A78T.01A.12R.A32O.07	lowexpression
TCGA.IB.AAUP.01A.11R.A37L.07	TCGA.IB.AAUP.01A.11R.A37L.07	lowexpression
TCGA.3A.A9I9.01A.11R.A38C.07	TCGA.3A.A9I9.01A.11R.A38C.07	lowexpression
TCGA.2J.AABI.01A.12R.A41B.07	TCGA.2J.AABI.01A.12R.A41B.07	lowexpression
TCGA.YY.A8LH.01A.11R.A36G.07	TCGA.YY.A8LH.01A.11R.A36G.07	highexpression
