# Supplementary material for: PLA2G16 expression predicts prognosis and gemcitabine sensitivity in patients with pancreatic cancer
Source: PeerJ journal article supplement (doi:10.7717/peerj.19517), 2025-05-30
Supplement: FIG_4B-F.zip [file FIG 4B.xlsx]

## Sheet: Sheet1
group	highexpression	highexpression	highexpression	highexpression	highexpression	highexpression	highexpression	highexpression	highexpression	highexpression	highexpression	highexpression	highexpression	highexpression	highexpression	highexpression	highexpression	highexpression	highexpression	highexpression	highexpression	highexpression	highexpression	highexpression	highexpression	highexpression	highexpression	highexpression	highexpression	highexpression	highexpression	highexpression	highexpression	highexpression	highexpression	highexpression	highexpression	highexpression	highexpression	highexpression	highexpression	highexpression	highexpression	highexpression	highexpression	highexpression	highexpression	highexpression	highexpression
sample	TCGA.2J.AAB1.01A.11R.A41B.07	TCGA.2J.AAB4.01A.12R.A41B.07	TCGA.2J.AAB9.01A.11R.A41B.07	TCGA.2J.AABE.01A.12R.A41B.07	TCGA.2J.AABH.01A.21R.A41B.07	TCGA.2J.AABO.01A.21R.A41B.07	TCGA.2J.AABU.01A.11R.A41B.07	TCGA.2L.AAQI.01A.12R.A39D.07	TCGA.2L.AAQJ.01A.12R.A39D.07	TCGA.3A.A9I5.01A.11R.A38C.07	TCGA.3A.A9IC.01A.11R.A38C.07	TCGA.3A.A9IH.01A.12R.A39D.07	TCGA.3A.A9IU.01A.11R.A39D.07	TCGA.3A.A9IZ.01A.12R.A41B.07	TCGA.3A.A9J0.01A.11R.A41B.07	TCGA.F2.6879.01A.11R.2156.07	TCGA.F2.A44G.01A.11R.A26U.07	TCGA.F2.A8YN.01A.11R.A37L.07	TCGA.FB.A545.01A.11R.A26U.07	TCGA.FB.AAPY.01A.11R.A41B.07	TCGA.FB.AAPZ.01A.11R.A41B.07	TCGA.FB.AAQ6.01A.11R.A41B.07	TCGA.H6.8124.01A.11R.2404.07	TCGA.HV.A5A6.01A.11R.A26U.07	TCGA.HV.A7OP.01A.11R.A33R.07	TCGA.HV.AA8X.01A.11R.A39D.07	TCGA.HZ.8001.01A.11R.2204.07	TCGA.HZ.8637.01A.11R.2404.07	TCGA.HZ.A77O.01A.11R.A33R.07	TCGA.HZ.A9TJ.01A.11R.A41I.07	TCGA.IB.7644.01A.11R.2156.07	TCGA.IB.7651.01A.11R.2156.07	TCGA.IB.7889.01A.11R.2156.07	TCGA.IB.8127.01A.11R.2404.07	TCGA.IB.A5SP.01A.11R.A32O.07	TCGA.IB.A5SS.01A.11R.A32O.07	TCGA.IB.A7LX.01A.12R.A36G.07	TCGA.IB.AAUO.01A.12R.A38C.07	TCGA.IB.AAUU.01A.11R.A37L.07	TCGA.L1.A7W4.01A.12R.A36G.07	TCGA.LB.A7SX.01A.11R.A33R.07	TCGA.OE.A75W.01A.12R.A32O.07	TCGA.PZ.A5RE.01A.11R.A32O.07	TCGA.Q3.A5QY.01A.12R.A32O.07	TCGA.RB.AA9M.01A.11R.A39D.07	TCGA.US.A774.01A.21R.A32O.07	TCGA.XD.AAUH.01A.42R.A41B.07	TCGA.XD.AAUI.01A.42R.A41B.07	TCGA.XD.AAUL.01A.21R.A39D.07
PNLIP	3.31616	3.38162	13.1332	5.27252	10.4273	11.1398	0.565695	8.44779	1.19314	3.62314	1.76218	1.96092	9.73528	5.00911	0.457962	0.156267	7.90511	0.398898	1.68724	5.26519	8.50595	0	0.254231	3.17919	0.0885487	4.92129	3.44622	1.58746	13.1038	1.58029	2.50744	7.67843	10.6852	9.17076	10.0787	0.0468403	0.443182	2.17639	6.12069	0.0949116	0	1.30679	0.678342	0	0.158078	10.9542	0.724999	8.24238	5.27051
CLPS	4.59075	4.8959	10.6945	3.64324	8.99328	10.4446	0.337311	5.9288	0.698041	3.58333	1.76617	2.93821	7.50377	3.68632	0.442333	0.0347792	5.61638	0.662297	1.22083	3.86533	7.70458	0.10541	0.127633	1.98328	0.148088	4.27127	2.47892	0.778965	12.3965	0.809003	1.06723	5.5828	11.0214	6.25126	8.32028	0.0399806	1.23002	3.59963	6.07823	0.049352	0.292782	0.597412	0.244278	0	0.638027	8.15948	0.435095	6.17218	5.14017
CPA1	6.21302	5.2236	11.8922	4.46154	10.0692	10.3745	0.355016	8.37743	0.796349	3.48017	1.59817	2.87965	9.80576	6.16259	0.345056	0.182057	6.60036	1.39006	3.75424	5.34618	7.96345	0.0230424	0.543298	1.90958	0	4.47946	4.36923	1.10467	13.1306	0.900954	1.7337	7.54704	10.4189	8.45369	8.04006	0.0086303	2.5732	3.79118	5.40761	0.468531	0.202762	1.04509	0.117296	0.252537	0.916553	10.7956	0.699996	7.84208	4.96368
CEL	5.77248	5.46085	10.7324	3.42284	7.58658	8.11342	0.207643	7.94807	0.694033	2.74166	1.26466	2.65844	8.73105	5.35524	0.263996	0.167358	4.66019	1.53501	3.45076	4.91202	7.35779	0.0540844	0.633664	1.4578	0.149129	3.00038	3.72149	0.658371	11.3515	0.579759	0.928276	6.2415	8.79291	6.16617	7.56971	0.117828	3.27487	3.74283	5.34395	1.64704	0.980391	0.413919	0.310456	0.260387	1.20044	9.25224	0.389897	6.31839	4.47233
CPB1	4.90396	4.79202	11.3064	3.71354	9.14612	8.89386	0.199248	8.35686	0.494569	2.71352	1.28989	2.64791	9.08306	5.21495	0.208392	0.082975	6.23205	0.947928	3.41033	5.04233	7.51854	0.152897	1.59211	1.47845	0.00820001	3.00596	3.71439	0.804549	11.9101	0.348232	1.40327	7.08509	9.97998	7.77911	7.7145	0.0211954	2.16411	2.92163	5.03234	0.300065	0.104471	0.450802	0.941257	0.0812033	0.954345	10.105	0.709555	7.21108	4.42667
PRSS1	6.31028	6.04904	12.7858	5.80706	10.4322	11.3131	1.02913	9.26071	6.37045	4.24393	2.60512	3.86901	9.93608	6.611	4.61606	3.28961	7.68845	3.66772	4.14128	6.38	8.54894	7.77126	2.41338	3.09938	0.0490731	5.04132	5.08623	1.58159	12.7214	2.29904	2.29045	7.98982	10.7245	9.15829	9.58576	0.518837	2.61004	5.09244	6.84216	0.543496	0.58938	3.07164	0.587173	1.31996	2.25617	11.101	1.04068	8.0356	6.5097
GP2	5.60327	3.68895	10.1536	3.02368	7.47737	8.65263	0.126048	6.83221	0.903038	5.31155	0.610983	1.46184	7.98184	4.49382	0.0909889	1.93448	5.3311	0.934705	1.86457	4.83212	6.55193	0.357721	0.575409	1.96573	0.37529	2.52238	2.39717	2.52782	10.9369	1.06502	1.6445	5.27035	8.63314	7.32578	6.00941	0.023894	0.548831	2.09123	4.18587	0.227371	0.849759	0.303342	2.07557	0.0332292	0.300182	9.25771	0.28948	6.49027	3.75188
SYCN	2.34747	2.80822	10.2783	2.63515	7.8196	7.76276	0.242694	6.22552	0.29772	2.26936	0.847115	0.926227	7.71251	2.63387	0.1153	0	4.81768	0.165558	1.00705	3.20228	5.06919	0	0.132906	1.22651	0.0791562	2.81018	1.1281	0.523963	10.0955	0.231924	0.788519	5.3491	6.60017	6.48433	7.86044	0	0.529471	2.26081	4.53865	0.195852	0	0.3421	0.214622	0	0.158466	7.82197	0.18612	5.31582	3.64181
PLA2G1B	3.85297	4.41207	11.7521	3.56529	8.98487	9.66104	0.117163	7.57213	0.708938	2.93251	1.45581	2.21391	9.75288	5.10763	0.253384	0.190425	7.14251	0.710085	3.18557	5.90421	7.30963	0.663481	0.439783	1.79656	0.333882	2.84685	3.20522	1.25036	12.2337	0.681224	1.7233	7.4982	11.1238	8.05472	8.24424	0	1.59087	3.29605	5.20767	0.181675	0.624616	1.41072	0.697596	0.154972	1.16986	10.1066	0.852159	7.3953	5.31287
CPA2	5.29273	5.37053	10.937	2.83368	8.32692	8.7558	0.0418037	7.86239	0.385928	2.42476	1.09194	2.92071	7.99749	4.96813	0.163885	0.0117819	5.55681	1.25882	2.84479	5.57291	6.94478	0	0.686971	1.21425	0.0258793	2.58369	4.08484	1.44419	10.7781	0.308011	1.013	6.11361	10.834	6.75369	7.34373	0	2.79637	4.14102	5.02514	0.18916	0.249263	0.288181	0.114234	0.161436	1.23548	9.36132	0.437228	6.33366	4.86617
PLAAT3	4.96647	5.49628	4.93717	5.20749	5.25687	5.43022	6.75321	5.82402	5.60102	4.99346	5.21662	5.52426	6.43788	5.50445	6.23079	5.55413	5.81776	5.05553	6.60116	6.2203	5.25318	5.08677	6.56379	6.42354	5.17274	5.09447	5.46499	5.0624	5.28091	5.37631	5.47814	4.93719	5.51372	5.12512	6.12059	5.78013	5.54325	5.64092	6.23939	6.5316	5.99558	5.8148	5.79421	4.96998	6.24979	4.94888	5.11648	6.76322	5.96929
SFN	7.83269	8.41069	6.4797	7.73591	7.08383	6.90822	7.50038	6.61335	7.46895	6.69046	8.77372	6.78276	7.53341	7.78766	7.75189	7.5088	8.18218	8.10705	7.38763	7.94529	7.31879	7.26751	6.60871	7.2684	8.64839	8.01974	6.83914	5.35697	7.69486	8.07445	7.74683	7.39956	6.23575	7.15435	8.40644	6.70522	6.75316	8.21601	8.4311	7.36669	7.53822	8.25227	8.03981	6.03387	6.02625	6.69724	5.36853	7.84638	7.27948
CST6	2.2587	5.42582	5.37204	4.3678	5.81889	7.42749	6.59606	5.1735	3.48313	1.16305	2.22487	6.36198	7.33678	2.94422	5.16524	2.6792	2.78971	4.34486	6.07431	5.5808	6.02294	2.25396	5.04557	6.28724	0.631151	1.40119	6.0022	1.33845	5.75189	3.97421	0.661111	0.849359	6.18689	6.65974	2.86096	6.19543	6.55301	6.75555	4.1813	6.48051	3.11947	3.75479	5.34037	6.53081	7.0055	4.47432	5.06307	7.39239	4.8208
KRT16	3.63997	5.86608	4.19813	4.83416	6.54787	7.22436	8.24116	5.32881	5.55233	1.18231	6.04344	6.40104	6.74659	6.52778	3.53127	2.21729	5.30299	5.3735	4.66633	4.05921	5.42581	4.40531	4.99557	2.9851	0.492212	3.8897	4.88536	1.22014	5.64484	4.97493	2.29699	2.38422	6.71461	4.80036	4.35843	5.33847	7.96123	7.50596	5.72608	4.7055	7.07357	6.317	6.09368	5.12865	5.45593	3.24846	2.73281	6.02245	4.90376
TRIM29	5.73108	5.79572	4.87257	5.2004	4.615	4.90721	6.27672	5.33051	5.70693	1.37551	4.30459	6.31431	5.21779	3.4315	5.51178	4.57989	4.97299	6.18883	4.26321	4.08632	5.25231	3.51068	4.67347	4.24363	2.77429	5.80599	5.08158	3.44225	3.83539	2.47283	4.44457	3.27158	5.09101	4.69687	6.2492	4.15457	5.28187	5.37772	3.79051	3.32836	5.98769	5.30031	5.65672	3.90809	3.27769	4.44021	3.08231	3.19033	5.85443
CLIC3	6.79256	5.72086	4.03464	5.65862	6.44906	5.75069	6.7078	4.96154	5.30396	4.76419	4.39897	7.44571	6.78457	3.87042	5.80186	5.83058	4.34398	5.69364	5.23761	4.48226	5.25379	2.8583	4.06698	2.87694	5.94229	5.53277	3.18531	2.65833	6.32023	4.03024	5.68758	4.1245	5.20557	4.19231	5.82447	5.54634	5.59688	6.2906	4.05322	6.6035	4.62656	7.05771	5.4725	5.47289	3.58125	4.73409	3.61716	5.33983	4.30341
PADI1	1.94478	5.66326	3.61597	5.67071	1.96684	4.82554	6.73374	4.05391	2.425	0.0824301	5.57703	5.24984	6.63049	1.38797	4.11029	2.95877	6.23039	5.68043	4.92876	2.79716	5.7237	3.95776	2.59156	5.74632	0.0190614	2.40814	4.79807	0.0681893	4.02894	0.691087	0.58246	0.367818	4.57865	4.57797	0.601316	4.43904	3.99428	3.47025	4.52961	0.776525	5.28264	1.85364	5.86641	3.57919	4.7771	3.46728	2.61443	4.81248	3.5246
S100P	10.222	8.94697	7.09758	9.30394	9.82425	7.30142	9.12233	9.88214	9.83694	1.96081	9.14407	11.341	11.2265	11.0264	9.77239	10.5619	9.9478	10.9116	7.93014	9.79782	10.0717	9.36955	9.39525	9.57776	10.8769	9.88459	9.28662	6.47386	8.80501	10.4567	10.3346	9.17503	9.07668	8.51673	10.0509	9.33545	7.46984	8.38837	10.7612	11.1454	9.70496	11.2818	10.8828	6.36543	7.00405	7.04105	7.28139	9.64116	10.9236
MSLN	8.56143	6.65819	5.37368	9.01471	7.68303	5.53307	6.40268	7.30075	7.63308	0.911346	7.21688	9.68198	7.30797	7.84626	9.15945	7.61773	8.24558	8.91843	7.85416	6.87213	6.01054	7.98151	6.0197	6.6632	9.2238	7.91327	7.04259	5.77797	6.4451	7.14381	7.76236	6.32418	6.4185	6.66806	7.88475	6.26938	6.42779	8.2331	7.83575	6.96184	7.97061	8.47953	7.15043	6.05352	7.00427	6.69007	5.39424	5.01771	6.92657
PSCA	7.66081	2.5826	3.10462	7.68025	7.73509	5.24426	7.62714	6.58881	6.46515	0.123269	4.24422	6.67916	10.1241	6.01407	7.07652	7.91343	8.1814	8.95221	6.07904	9.36216	7.44873	2.06271	8.12703	3.44939	0.393197	6.04609	8.27346	1.29131	4.77733	5.17864	6.08971	3.94465	5.12562	2.75495	6.37072	6.17786	7.9345	4.99002	7.25734	3.47307	8.18401	9.76613	9.86595	6.30389	4.73101	6.80298	3.37708	2.91816	8.11533
[truncated: 53 more columns]
