# Supplementary material for: PLA2G16 expression predicts prognosis and gemcitabine sensitivity in patients with pancreatic cancer
Source: PeerJ journal article supplement (doi:10.7717/peerj.19517), 2025-05-30
Supplement: FIG_4B-F.zip [file GO_BP.xlsx]

## Sheet: GO_BP
Category	Term	Count	%	PValue	Genes	List Total	Pop Hits	Pop Total	Fold Enrichment	Bonferroni	Benjamini	FDR
GOTERM_BP_DIRECT	GO:0006508~proteolysis	16	13.7931	1.24988e-06	CPA2, CELA3A, PRSS1, CELA3B, CPA1, CELA2A, CPB1, CELA2B, TMPRSS4, KLK10, WFDC2, KLK6, ANPEP, MMP28, CTRC, PRSS2	110	593	19256	4.72323	0.000775872	0.000776173	0.000776173
GOTERM_BP_DIRECT	GO:0061436~establishment of skin barrier	5	4.31034	4.44288e-05	FA2H, CLDN4, KRT16, SFN, LSR	110	35	19256	25.0078	0.0272138	0.0137952	0.0137952
GOTERM_BP_DIRECT	GO:0016042~lipid catabolic process	6	5.17241	0.000248391	PNLIPRP1, CLPS, PLA2G1B, PLAAT3, PLAAT2, PNLIP	110	99	19256	10.6094	0.14296	0.051417	0.051417
GOTERM_BP_DIRECT	GO:0031424~keratinization	5	4.31034	0.000866957	CDH3, KRT17, KRT16, KRT7, SFN	110	75	19256	11.6703	0.416443	0.134595	0.134595
GOTERM_BP_DIRECT	GO:0008544~epidermis development	5	4.31034	0.00121037	COL17A1, CRABP2, GJB5, LAMC2, CST6	110	82	19256	10.6741	0.528621	0.150327	0.150327
GOTERM_BP_DIRECT	GO:0019731~antibacterial humoral response	4	3.44828	0.00649907	SLPI, PLA2G1B, PI3, WFDC2	110	67	19256	10.451	0.982562	0.625473	0.625473
GOTERM_BP_DIRECT	GO:0045109~intermediate filament organization	4	3.44828	0.00705042	KRT19, KRT17, KRT16, KRT7	110	69	19256	10.1481	0.987647	0.625473	0.625473
GOTERM_BP_DIRECT	GO:0045087~innate immune response	9	7.75862	0.0102833	TMEM45B, C7, SLPI, TRIM29, KRT16, GP2, PTK6, PI3, WFDC2	110	528	19256	2.98388	0.99837	0.706225	0.706225
GOTERM_BP_DIRECT	GO:0006629~lipid metabolic process	6	5.17241	0.0103171	PNLIPRP1, FA2H, UGT1A10, CLPS, CEL, PNLIP	110	232	19256	4.52727	0.998404	0.706225	0.706225
GOTERM_BP_DIRECT	GO:0007586~digestion	3	2.58621	0.0116677	PRSS1, CLPS, PRSS2	110	29	19256	18.1091	0.999316	0.706225	0.706225
GOTERM_BP_DIRECT	GO:0007155~cell adhesion	9	7.75862	0.0130399	CLDN4, CXCL12, CDH3, ITGB4, LY6D, LAMC2, MSLN, THBS4, EPHA2	110	551	19256	2.85933	0.999712	0.706225	0.706225
GOTERM_BP_DIRECT	GO:0031069~hair follicle morphogenesis	3	2.58621	0.0158294	NGFR, WNT10A, KRT17	110	34	19256	15.446	0.99995	0.706225	0.706225
GOTERM_BP_DIRECT	GO:0015701~bicarbonate transport	3	2.58621	0.0167274	SLC39A5, SLC4A4, SLC39A4	110	35	19256	15.0047	0.999972	0.706225	0.706225
GOTERM_BP_DIRECT	GO:0006882~cellular zinc ion homeostasis	3	2.58621	0.0167274	SLC39A5, MT1G, SLC39A4	110	35	19256	15.0047	0.999972	0.706225	0.706225
GOTERM_BP_DIRECT	GO:0051179~localization	3	2.58621	0.0176467	MUC1, PLAAT3, PLAAT2	110	36	19256	14.5879	0.999984	0.706225	0.706225
GOTERM_BP_DIRECT	GO:0030855~epithelial cell differentiation	4	3.44828	0.0181958	KRT19, KRT17, KRT16, GSTA2	110	98	19256	7.14508	0.999989	0.706225	0.706225
GOTERM_BP_DIRECT	GO:0030574~collagen catabolic process	3	2.58621	0.0225529	MMP28, PRSS2, KLK6	110	41	19256	12.8089	0.999999	0.823845	0.823845
GOTERM_BP_DIRECT	GO:0098609~cell-cell adhesion	5	4.31034	0.0241041	CDH3, TRIM29, ITGB4, COL14A1, PKP3	110	193	19256	4.53509	1	0.831591	0.831591
GOTERM_BP_DIRECT	GO:0031581~hemidesmosome assembly	2	1.72414	0.0334907	COL17A1, ITGB4	110	6	19256	58.3515	1	1	1
GOTERM_BP_DIRECT	GO:0070292~N-acylphosphatidylethanolamine metabolic process	2	1.72414	0.0498169	PLAAT3, PLAAT2	110	9	19256	38.901	1	1	1
GOTERM_BP_DIRECT	GO:0034224~cellular response to zinc ion starvation	2	1.72414	0.0498169	SLC39A5, SLC39A4	110	9	19256	38.901	1	1	1
GOTERM_BP_DIRECT	GO:0009611~response to wounding	3	2.58621	0.0524348	ITGB4, TMPRSS4, KLK6	110	65	19256	8.07944	1	1	1
GOTERM_BP_DIRECT	GO:0071578~zinc II ion transmembrane import	2	1.72414	0.055198	SLC39A5, SLC39A4	110	10	19256	35.0109	1	1	1
GOTERM_BP_DIRECT	GO:0030198~extracellular matrix organization	4	3.44828	0.0597567	COL17A1, COL14A1, MMP28, SERPINB5	110	157	19256	4.45999	1	1	1
GOTERM_BP_DIRECT	GO:0030299~intestinal cholesterol absorption	2	1.72414	0.0658697	CEL, PNLIP	110	12	19256	29.1758	1	1	1
GOTERM_BP_DIRECT	GO:0036152~phosphatidylethanolamine acyl-chain remodeling	2	1.72414	0.0658697	PLAAT3, PLAAT2	110	12	19256	29.1758	1	1	1
GOTERM_BP_DIRECT	GO:0060326~cell chemotaxis	3	2.58621	0.0659175	HOXB9, CXCL12, EPHA2	110	74	19256	7.09681	1	1	1
GOTERM_BP_DIRECT	GO:0007175~negative regulation of epidermal growth factor-activated receptor activity	2	1.72414	0.0764221	GPRC5A, CBLC	110	14	19256	25.0078	1	1	1
GOTERM_BP_DIRECT	GO:0006952~defense response	3	2.58621	0.0787553	CXCL12, ACKR1, KCNN4	110	82	19256	6.40443	1	1	1
GOTERM_BP_DIRECT	GO:0030307~positive regulation of cell growth	3	2.58621	0.0888516	KRT17, SFN, PRSS2	110	88	19256	5.96777	1	1	1
GOTERM_BP_DIRECT	GO:0050678~regulation of epithelial cell proliferation	2	1.72414	0.0920295	TACSTD2, SERPINB5	110	17	19256	20.5947	1	1	1
GOTERM_BP_DIRECT	GO:0045926~negative regulation of growth	2	1.72414	0.0971737	MT1G, PTK6	110	18	19256	19.4505	1	1	1
