# Supplementary material for: PLA2G16 expression predicts prognosis and gemcitabine sensitivity in patients with pancreatic cancer
Source: PeerJ journal article supplement (doi:10.7717/peerj.19517), 2025-05-30
Supplement: FIG_4B-F.zip [file GO_CC.xlsx]

## Sheet: GO_CC
Category	Term	Count	%	PValue	Genes	List Total	Pop Hits	Pop Total	Fold Enrichment	Bonferroni	Benjamini	FDR
GOTERM_CC_DIRECT	GO:0005615~extracellular space	39	33.6207	7.5815e-13	COL17A1, CELA3A, PNLIPRP2, PRSS1, CELA3B, CPB1, AMY2A, PLA2G1B, COL14A1, AMY2B, TMPRSS4, TACSTD2, LAMC2, REG3G, THBS4, WFDC2, KLK6, IGLV4-60, MUC1, C7, ANPEP, MMP28, SFN, PI3, S100A14, PRSS2, CPA2, WNT10A, CPA1, CELA2A, CELA2B, GP2, CEL, DKK1, SERPINB5, SLPI, OGN, SERPINI2, PNLIP	113	1931	20521	3.66777	1.20549e-10	9.95966e-11	9.64646e-11
GOTERM_CC_DIRECT	GO:0005576~extracellular region	41	35.3448	1.25279e-12	SFTA2, COL17A1, PNLIPRP1, CDA, PNLIPRP2, PRSS1, PSCA, AMY2A, PLA2G1B, COL14A1, LAMC2, IGHV2-70D, IGHV3-49, REG3G, MSLN, CHRDL1, THBS4, WFDC2, KLK6, C7, PI3, PRSS2, NGFR, CPA2, WNT10A, CELA2A, CELA2B, GP2, VSTM2L, CEL, KLK10, DKK1, CXCL12, CLPS, SLPI, OGN, NMU, LY6D, IGHV1-69-2, S100P, PNLIP	113	2172	20521	3.42803	1.99191e-10	9.95966e-11	9.64646e-11
GOTERM_CC_DIRECT	GO:0070062~extracellular exosome	34	29.3103	6.25836e-08	CLIC3, PSCA, AMY2A, CRABP2, AMY2B, ITGB4, TACSTD2, SLC2A1, CST6, SLC4A4, THBS4, WFDC2, MUC1, C7, ANPEP, EPS8L1, SLC39A5, SFN, S100A14, TSPAN1, GP2, KRT7, LSR, CEL, NCCRP1, KRT19, GPRC5A, CXCL12, SLPI, KRT16, GSTA2, OGN, SERPINI2, S100P	113	2241	20521	2.75523	9.95074e-06	3.31693e-06	3.21262e-06
GOTERM_CC_DIRECT	GO:0001533~cornified envelope	7	6.03448	9.09634e-07	KRT17, KRT16, PI3, PKP3, CST6, SERPINB5, KLK6	113	60	20521	21.1869	0.000144621	3.61579e-05	3.50209e-05
GOTERM_CC_DIRECT	GO:0030054~cell junction	7	6.03448	0.00056843	CDH3, GJB4, GJB3, ITGB4, LSR, PKP3, TSPAN1	113	187	20521	6.79793	0.0864399	0.0180761	0.0175077
GOTERM_CC_DIRECT	GO:0042589~zymogen granule membrane	3	2.58621	0.00526052	PNLIPRP2, SYCN, GP2	113	20	20521	27.2403	0.567698	0.131598	0.12746
GOTERM_CC_DIRECT	GO:0005922~connexin complex	3	2.58621	0.00579364	GJB4, GJB3, GJB5	113	21	20521	25.9431	0.603019	0.131598	0.12746
GOTERM_CC_DIRECT	GO:0070160~occluding junction	3	2.58621	0.00947967	CLDN4, LSR, EPHA2	113	27	20521	20.178	0.780072	0.188408	0.182484
GOTERM_CC_DIRECT	GO:0005604~basement membrane	4	3.44828	0.0131843	COL17A1, ITGB4, LAMC2, THBS4	113	90	20521	8.07119	0.878791	0.232922	0.225598
GOTERM_CC_DIRECT	GO:0009986~cell surface	9	7.75862	0.0248177	NGFR, PLA2G1B, ITGB4, LY6D, GP2, MSLN, SLC4A4, CACNG4, EPHA2	113	644	20521	2.53791	0.981607	0.394601	0.382192
GOTERM_CC_DIRECT	GO:0005886~plasma membrane	40	34.4828	0.0281022	COL17A1, PSCA, ITGB4, AQP8, TMPRSS4, SLC2A1, CBLC, IGHV2-70D, IGHV3-49, MSLN, CHRDL1, SLC4A4, IGLV4-60, MUC1, CDH3, C7, ANPEP, EPS8L1, PLEK2, KCNN4, TSPAN1, SLC39A4, CACNG4, NGFR, GP2, PLAAT3, LSR, PTK6, DKK1, SYT8, CLDN4, KRT19, GPRC5A, GJB4, LY6D, B3GNT3, IGHV1-69-2, ACKR1, PKP3, EPHA2	113	5395	20521	1.34645	0.989243	0.406204	0.393431
GOTERM_CC_DIRECT	GO:0031012~extracellular matrix	5	4.31034	0.030745	COL14A1, OGN, MMP28, PI3, PRSS2	113	216	20521	4.20374	0.993023	0.407371	0.394561
GOTERM_CC_DIRECT	GO:0030056~hemidesmosome	2	1.72414	0.0375903	COL17A1, ITGB4	113	7	20521	51.8862	0.997739	0.459758	0.4453
GOTERM_CC_DIRECT	GO:0005882~intermediate filament	4	3.44828	0.0413652	KRT19, KRT17, KRT16, KRT7	113	140	20521	5.18862	0.99879	0.46979	0.455017
GOTERM_CC_DIRECT	GO:0019814~immunoglobulin complex	4	3.44828	0.0514502	IGHV1-69-2, IGHV2-70D, IGHV3-49, IGLV4-60	113	153	20521	4.74776	0.999775	0.545372	0.528222
GOTERM_CC_DIRECT	GO:0009925~basal plasma membrane	3	2.58621	0.0560841	CLDN4, ITGB4, TACSTD2	113	70	20521	7.78293	0.999897	0.557336	0.53981
GOTERM_CC_DIRECT	GO:0016324~apical plasma membrane	6	5.17241	0.0693962	CLDN4, MUC1, AQP8, SLC2A1, GP2, SLC39A4	113	402	20521	2.71047	0.999989	0.649059	0.628648
GOTERM_CC_DIRECT	GO:0031982~vesicle	4	3.44828	0.0747972	MUC1, GPRC5A, KCNN4, TSPAN1	113	179	20521	4.05814	0.999996	0.658104	0.637409
GOTERM_CC_DIRECT	GO:0016328~lateral plasma membrane	3	2.58621	0.0787071	CLDN4, TACSTD2, SLC4A4	113	85	20521	6.40947	0.999998	0.658104	0.637409
GOTERM_CC_DIRECT	GO:0005911~cell-cell junction	4	3.44828	0.0827804	COL17A1, NGFR, CLDN4, PKP3	113	187	20521	3.88453	0.999999	0.658104	0.637409
GOTERM_CC_DIRECT	GO:0030141~secretory granule	3	2.58621	0.096795	TMPRSS4, KLK10, KLK6	113	96	20521	5.67506	1	0.732876	0.70983
