# Supplementary material for: PLA2G16 expression predicts prognosis and gemcitabine sensitivity in patients with pancreatic cancer
Source: PeerJ journal article supplement (doi:10.7717/peerj.19517), 2025-05-30
Supplement: FIG_4B-F.zip [file GO_MF.xlsx]

## Sheet: GO_MF
Category	Term	Count	%	PValue	Genes	List Total	Pop Hits	Pop Total	Fold Enrichment	Bonferroni	Benjamini	FDR
GOTERM_MF_DIRECT	GO:0004252~serine-type endopeptidase activity	10	8.62069	1.17588e-06	CELA3A, PRSS1, CELA2A, CELA3B, CELA2B, TMPRSS4, CTRC, KLK10, PRSS2, KLK6	108	187	18883	9.34987	0.000259836	0.00025987	0.000256342
GOTERM_MF_DIRECT	GO:0004806~triglyceride lipase activity	4	3.44828	0.000187989	PNLIPRP1, PNLIPRP2, CEL, PNLIP	108	20	18883	34.9685	0.0406981	0.0207728	0.0204908
GOTERM_MF_DIRECT	GO:0004867~serine-type endopeptidase inhibitor activity	5	4.31034	0.00332489	SLPI, SERPINI2, PI3, SERPINB5, WFDC2	108	108	18883	8.09456	0.520986	0.185833	0.183311
GOTERM_MF_DIRECT	GO:0005509~calcium ion binding	12	10.3448	0.0033635	PNLIPRP1, PNLIPRP2, CDH3, AMY2A, PLA2G1B, CBLC, S100P, S100A14, SYT8, PRSS2, THBS4, PADI1	108	746	18883	2.81248	0.525069	0.185833	0.183311
GOTERM_MF_DIRECT	GO:0004180~carboxypeptidase activity	3	2.58621	0.0056545	CPA2, CPA1, CPB1	108	20	18883	26.2264	0.714408	0.229351	0.226237
GOTERM_MF_DIRECT	GO:0005243~gap junction channel activity	3	2.58621	0.00622672	GJB4, GJB3, GJB5	108	21	18883	24.9775	0.748524	0.229351	0.226237
GOTERM_MF_DIRECT	GO:0045296~cadherin binding	7	6.03448	0.0097844	CDH3, GPRC5A, EPS8L1, SFN, S100P, PKP3, EPHA2	108	320	18883	3.82468	0.886164	0.308907	0.304714
GOTERM_MF_DIRECT	GO:0004181~metallocarboxypeptidase activity	3	2.58621	0.01329	CPA2, CPA1, CPB1	108	31	18883	16.9203	0.948014	0.326343	0.321913
GOTERM_MF_DIRECT	GO:0004623~phospholipase A2 activity	3	2.58621	0.01329	PLA2G1B, PLAAT3, PLAAT2	108	31	18883	16.9203	0.948014	0.326343	0.321913
GOTERM_MF_DIRECT	GO:0004866~endopeptidase inhibitor activity	3	2.58621	0.0268826	SLPI, PI3, WFDC2	108	45	18883	11.6562	0.997576	0.594106	0.586041
GOTERM_MF_DIRECT	GO:0016410~N-acyltransferase activity	2	1.72414	0.0390034	PLAAT3, PLAAT2	108	7	18883	49.955	0.999848	0.728324	0.718437
GOTERM_MF_DIRECT	GO:0042379~chemokine receptor binding	2	1.72414	0.0444509	CXCL12, S100A14	108	8	18883	43.7106	0.999957	0.728324	0.718437
GOTERM_MF_DIRECT	GO:0008236~serine-type peptidase activity	3	2.58621	0.0455136	TMPRSS4, KLK10, PRSS2	108	60	18883	8.74213	0.999966	0.728324	0.718437
GOTERM_MF_DIRECT	GO:0003823~antigen binding	4	3.44828	0.0461382	GP2, IGHV1-69-2, IGHV2-70D, IGHV3-49	108	141	18883	4.96007	0.999971	0.728324	0.718437
GOTERM_MF_DIRECT	GO:0004556~alpha-amylase activity	2	1.72414	0.0498678	AMY2A, AMY2B	108	9	18883	38.8539	0.999988	0.734719	0.724746
GOTERM_MF_DIRECT	GO:0052740~1-acyl-2-lysophosphatidylserine acylhydrolase activity	2	1.72414	0.0606105	PLAAT3, PLAAT2	108	11	18883	31.7896	0.999999	0.772895	0.762404
GOTERM_MF_DIRECT	GO:0008270~zinc ion binding	10	8.62069	0.0652626	CDA, CPA2, CPA1, CPB1, TRIM29, ANPEP, MMP28, CBLC, MT1G, SLC39A4	108	889	18883	1.96673	1	0.772895	0.762404
GOTERM_MF_DIRECT	GO:0052739~phosphatidylserine 1-acylhydrolase activity	2	1.72414	0.0659366	PLAAT3, PLAAT2	108	12	18883	29.1404	1	0.772895	0.762404
GOTERM_MF_DIRECT	GO:0008083~growth factor activity	4	3.44828	0.066448	CXCL12, OGN, DKK1, THBS4	108	164	18883	4.26445	1	0.772895	0.762404
GOTERM_MF_DIRECT	GO:0016298~lipase activity	2	1.72414	0.0712328	CEL, PNLIP	108	13	18883	26.8989	1	0.787123	0.776438
GOTERM_MF_DIRECT	GO:0008201~heparin binding	4	3.44828	0.0815446	COL17A1, LAMC2, CEL, THBS4	108	179	18883	3.9071	1	0.85816	0.846511
GOTERM_MF_DIRECT	GO:0005198~structural molecule activity	4	3.44828	0.0968454	CLDN4, KRT19, KRT17, KRT16	108	193	18883	3.62368	1	0.895703	0.883544
GOTERM_MF_DIRECT	GO:0098641~cadherin binding involved in cell-cell adhesion	2	1.72414	0.0972709	TRIM29, PKP3	108	18	18883	19.427	1	0.895703	0.883544
GOTERM_MF_DIRECT	GO:0008970~phosphatidylcholine 1-acylhydrolase activity	2	1.72414	0.0972709	PLAAT3, PLAAT2	108	18	18883	19.427	1	0.895703	0.883544
