# Supplementary material for: PLA2G16 expression predicts prognosis and gemcitabine sensitivity in patients with pancreatic cancer
Source: PeerJ journal article supplement (doi:10.7717/peerj.19517), 2025-05-30
Supplement: FIG_4B-F.zip [file KEGG_PARTHWAY.xlsx]

## Sheet: KEGG_PARTHWAY
Category	Term	Count	%	PValue	Genes	List Total	Pop Hits	Pop Total	Fold Enrichment	Bonferroni	Benjamini	FDR
KEGG_PATHWAY	hsa04972:Pancreatic secretion	17	14.6552	2.1e-18	PNLIPRP1, PNLIPRP2, CPA2, CELA3A, PRSS1, CELA3B, CPA1, CELA2A, CPB1, CELA2B, AMY2A, PLA2G1B, AMY2B, CEL, SLC4A4, PRSS2, PNLIP	59	102	8662	24.4689	2.65e-16	2.65e-16	2.61e-16
KEGG_PATHWAY	hsa04974:Protein digestion and absorption	12	10.3448	5.59e-11	COL17A1, CELA3A, CPA2, PRSS1, CELA2A, CELA3B, CPA1, CPB1, CELA2B, COL14A1, KCNN4, PRSS2	59	103	8662	17.1045	7.04e-09	3.52e-09	3.46e-09
KEGG_PATHWAY	hsa04975:Fat digestion and absorption	6	5.17241	8.95e-06	PNLIPRP1, PNLIPRP2, CLPS, PLA2G1B, CEL, PNLIP	59	43	8662	20.4856	0.00112693	0.000376	0.00037
KEGG_PATHWAY	hsa00590:Arachidonic acid metabolism	4	3.44828	0.00778924	PLA2G1B, PLAAT3, PLAAT2, PTGES	59	61	8662	9.62712	0.626668	0.214553	0.211148
KEGG_PATHWAY	hsa00561:Glycerolipid metabolism	4	3.44828	0.00851403	PNLIPRP1, PNLIPRP2, CEL, PNLIP	59	63	8662	9.3215	0.659507	0.214553	0.211148
KEGG_PATHWAY	hsa00592:alpha-Linolenic acid metabolism	3	2.58621	0.0129184	PLA2G1B, PLAAT3, PLAAT2	59	26	8662	16.94	0.805694	0.271286	0.26698
KEGG_PATHWAY	hsa00591:Linoleic acid metabolism	3	2.58621	0.016998	PLA2G1B, PLAAT3, PLAAT2	59	30	8662	14.6814	0.884693	0.305963	0.301107
KEGG_PATHWAY	hsa04976:Bile secretion	4	3.44828	0.0215527	UGT1A10, AQP8, SLC2A1, SLC4A4	59	89	8662	6.59836	0.935773	0.339455	0.334066
KEGG_PATHWAY	hsa00565:Ether lipid metabolism	3	2.58621	0.0439721	PLA2G1B, PLAAT3, PLAAT2	59	50	8662	8.80881	0.996538	0.615609	0.605837
KEGG_PATHWAY	hsa04014:Ras signaling pathway	5	4.31034	0.0727927	NGFR, PLA2G1B, PLAAT3, PLAAT2, EPHA2	59	236	8662	3.11046	0.999927	0.917188	0.90263
