# Supplementary material for: PLA2G16 expression predicts prognosis and gemcitabine sensitivity in patients with pancreatic cancer
Source: PeerJ. 2025 May 30;13:e19517. doi: 10.7717/peerj.19517 (PMC12129006; doi:10.7717/peerj.19517)
Supplement: Supplemental Information 14 [file peerj-13-19517-s014.xlsx]

## Sheet: Sheet1
This checklist applies to the 2.5 RT-qPCR analysis section on page 5 of the manuscript
ITEM TO CHECK	IMPORTANCE	CHECKLIST
EXPERIMENTAL DESIGN
Definition of experimental and control groups	E	The control group was the empty group, and the experimental groups were the PLA2G16 knockdown groups with different sequences.
Number within each group	E	4
Assay carried out by core lab or investigator's lab?	D
Acknowledgement of authors' contributions	D
SAMPLE
Description	E	RNA was obtained from PANC-1/GR cells
Volume/mass of sample processed	D
Microdissection or macrodissection	E	N/A
Processing procedure	E	Sample source: PANC-1/GR cells Sample processing: Lysis using Trizol reagent Storage conditions: Samples were either extracted immediately after collection or frozen at − 80°C for subsequent analysis.
If frozen - how and how quickly?	E	N/A
If fixed - with what, how quickly?	E	N/A
Sample storage conditions and duration (especially for FFPE samples)	E	Samples were stored at -80 ° C after QPCR
NUCLEIC ACID EXTRACTION
Procedure and/or instrumentation	E	Extraction reagent: Trizol reagent. Extraction steps: The procedures were performed according to the experimental procedures, including sample lysis, washing, and elution steps. Extraction conditions: Operation at room temperature, elution volume was 20 µL.
Name of kit and details of any modifications	E	Kit name: TRIzol reagent (precision Biology, CHINA) Modified details: N/A
Source of additional reagents used	D
Details of DNase or RNAse treatment	E	Total RNA was extracted from cultured cell lines using TRIzol reagent (precision Biology, CHINA), and concentrations were determined using a NanoDrop ND-2000 spectrophotometer (Thermo Fisher Scientific). The measured concentrations of total RNA were reverse transcribed into cDNA using 4x gDNA wiper Mix and 5x HiScript III qRT SuperMix (Vazyme, China).
Contamination assessment (DNA or RNA)	E	N/A
Nucleic acid quantification	E	Quantitative methods: Measurements were performed using a NanoDrop spectrophotometer. Model: Thermo Fisher NanoDrop 2000. The measurement results showed that the concentration was about 1000ng/µL. The A260/A280 ratio was 2.0 to 2.1, and the A260/A230 ratio was 2.0 to 2.2, indicating high purity. Sample dilution: The concentration was diluted to 1000ng/µL by measurement
Instrument and method	E	Instrument Name and model: Thermo Fisher NanoDrop 2000. Measurements: Spectrophotometry, measuring A260 absorbance to assess DNA concentration and purity. Reagents or dyes: none (spectrophotometry does not use dyes).
Purity (A260/A280)	D
Yield	D
RNA integrity method/instrument	E	N/A
RIN/RQI or Cq of 3' and 5' transcripts	E	N/A
Electrophoresis traces	D
Inhibition testing (Cq dilutions, spike or other)	E	N/A
REVERSE TRANSCRIPTION
Complete reaction conditions	E	RNA template: 1000 ng/µL, 1 µL. dd water: 11µL 4x gDNA wiper Mix: 4µL 5x HiScript III qRT SuperMix: 4µL Reaction conditions:Initial denaturation: 42°C for 2 min. Reverse transcription: 37°C for 15 min. Enzyme inactivation: 85°C for 5 seconds. Total reaction volume: 20 µL.
Amount of RNA and reaction volume	E	20μL
Priming oligonucleotide (if using GSP) and concentration	E	N/A
Reverse transcriptase and concentration	E	Reverse transcriptase name: 5×SuperMix Item number of enzyme: R223-01 Concentration of enzyme: 20µg/rxn, 4 µL used in the reverse transcription reaction.
Temperature and time	E	Initial denaturation: 42°C for 2 min. Reverse transcription: 37°C for 15 min. Enzyme inactivation: 85°C for 5 seconds.
Manufacturer of reagents and catalogue numbers	D
Cqs with and without RT	D*
Storage conditions of cDNA	D
qPCR TARGET INFORMATION
If multiplex, efficiency and LOD of each assay.	E	N/A
Sequence accession number	E	N/A
Location of amplicon	D
Amplicon length	E	N/A
In silico specificity screen (BLAST, etc)	E	N/A
Pseudogenes, retropseudogenes or other homologs?	D
Sequence alignment	D
Secondary structure analysis of amplicon	D
Location of each primer by exon or intron (if applicable)	E	Primer name: Forward Primer. Primer sequence: 5ʹ‐CCAGGTCAACAACAAACATGATG‐3ʹ Gene Name: Human CDK2 gene. Primer name: Reverse Primer. Primer sequences: 5ʹ‐CCCGCTGGATGATTTTGC‐3ʹ
What splice variants are targeted?	E	N/A
qPCR OLIGONUCLEOTIDES
Primer sequences	E	human PLA2G16, 5ʹ‐CCAGGTCAACAACAAACATGATG‐3ʹ (forward) and 5ʹ‐CCCGCTGGATGATTTTGC‐3ʹ (reverse); human GAPDH, 5ʹ-TGATGACATCAAGAAGGTGGTGAAG-3ʹ (forward) and 5ʹ-TCCTTGGAGGCCATGTGGGCCAT-3ʹ (reverse).
RTPrimerDB Identification Number	D
Probe sequences	D**
Location and identity of any modifications	E	N/A
Manufacturer of oligonucleotides	D
Purification method	D
qPCR PROTOCOL
Complete reaction conditions	E	Reaction components: qPCR kit: 2X SYBR Green Pro Taq HS Premix*, 5 µL. Preprimer: 5ʹ‐CCAGGTCAACAACAAACATGATG‐3ʹ (forward),0.2 µL Post-primer: 5ʹ‐CCCGCTGGATGATTTTGC‐3ʹ (reverse), 0.2 µL. cDNA template: 0.2 µL. Rnaase-free water: 4.4 µL (to supplement the total reaction volume). Total reaction volume: 10 µL. PCR cycle conditions: Initial denaturation was performed at 95°C for 10 min. Cycle steps: D…
Reaction volume and amount of cDNA/DNA	E	0.2μL
Primer, (probe), Mg++ and dNTP concentrations	E	Preprimer concentration: 100µM, 0.2µL used. Post-primer concentration: 100µM, 0.2µL used.
Polymerase identity and concentration	E	N/A
Buffer/kit identity and manufacturer	E	Name of the buffer/kit: SYBR Green Pro Taq HS premixed qPCR kit Type: qPCR kit. Manufacturer: ACCURATE BIOOLGY. Item No. : AG11701.
Exact chemical constitution of the buffer	D
Additives (SYBR Green I, DMSO, etc.)	E	SYBR Green I
Manufacturer of plates/tubes and catalog number	D
Complete thermocycling parameters	E	PCR cycle conditions: Initial denaturation was performed at 95°C for 10 min. Cycle steps: Denaturation was performed at 95°C for 15 seconds. Annealing: 60°C for 30 seconds. Extension: 72°C for 30 seconds. Number of cycles: 40 cycles.
Reaction setup (manual/robotic)	D
Manufacturer of qPCR instrument	E	Instrument name: CFX96 Touch Manufacturer: Bio-Rad
qPCR VALIDATION
Evidence of optimisation (from gradients)	D
Specificity (gel, sequence, melt, or digest)	E	N/A
For SYBR Green I, Cq of the NTC	E	SYBR Green I
Standard curves with slope and y-intercept	E	N/A
PCR efficiency calculated from slope	E	N/A
Confidence interval for PCR efficiency or standard error	D
r2 of standard curve	E	N/A
Linear dynamic range	E	N/A
Cq variation at lower limit	E	N/A
Confidence intervals throughout range	D
Evidence for limit of detection	E	N/A
If multiplex, efficiency and LOD of each assay.	E	N/A
DATA ANALYSIS
qPCR analysis program (source, version)	E	N/A
Cq method determination	E	N/A
Outlier identification and disposition	E	N/A
Results of NTCs	E	Outliers were removed
Justification of number and choice of reference genes	E	Cq value of each negative Control (NTC, No Template Control) was recorded. Indicate whether there is any fluorescence signal observed in the negative control reaction and discuss its effect on the experiment.
Description of normalisation method	E	GAPDH
Number and concordance of biological replicates	D
Number and stage (RT or qPCR) of technical replicates	E	Reverse transcription phase: Three technical replicates were performed for each sample to ensure consistency of reverse transcription. qPCR phase: Four technical replicates were performed for each sample to ensure the reliability of the qPCR results.
Repeatability (intra-assay variation)	E	Number of technical replicates: Four technical replicates were performed for each sample
Reproducibility (inter-assay variation, %CV)	D
Power analysis	D
Statistical methods for result significance	E	Types of statistical methods: Descriptive statistics: Mean and standard deviation were calculated. Inferential statistics: ANOVA (analysis of variance) was used to compare Cq values between experimental and control groups. Significance level: p < 0.05 was set as the significance criterion. Software or tools: Data analysis was performed using GraphPad Prism.
Software (source, version)	E	GraphPad Prism
Cq or raw data submission using RDML	D
Table 1. MIQE checklist for authors, reviewers and editors. All essential information (E) must be submitted with the manuscript. Desirable
information (D) should be submitted if available. If using primers obtained from RTPrimerDB, information on qPCR target, oligonucleotides,
protocols and validation is available from that source.
*: Assessing the absence of DNA using a no RT assay is essential when first extracting RNA. Once the sample has been validated as
RDNA-free, inclusion of a no-RT control is desirable, but no longer essential.
**: Disclosure of the probe sequence is highly desirable and strongly encouraged. However, since not all commercial pre-designed assay
vendors provide this information, it cannot be an essential requirement. Use of such assays is advised against.
