# Supplementary figures and images for: PLA2G16 expression predicts prognosis and gemcitabine sensitivity in patients with pancreatic cancer
Source: PeerJ journal article supplement (doi:10.7717/peerj.19517), 2025-05-30

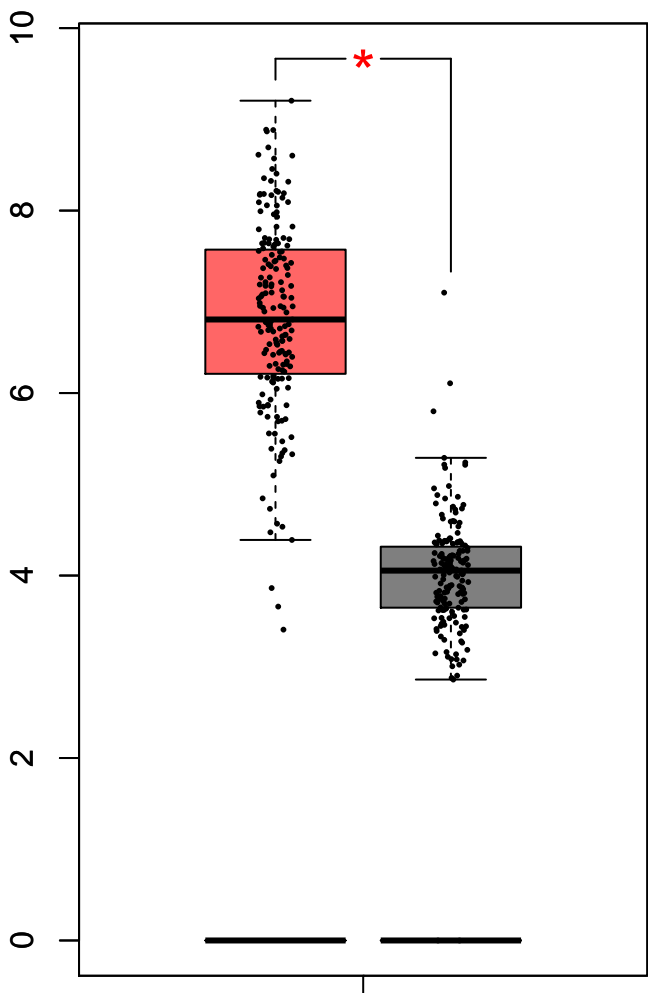

PAAD  
(num(T)=179; num(N)=171)

Supplement: FIG_1.zip [file FIG 1A.pdf › FIG 1/FIG 1A.pdf]

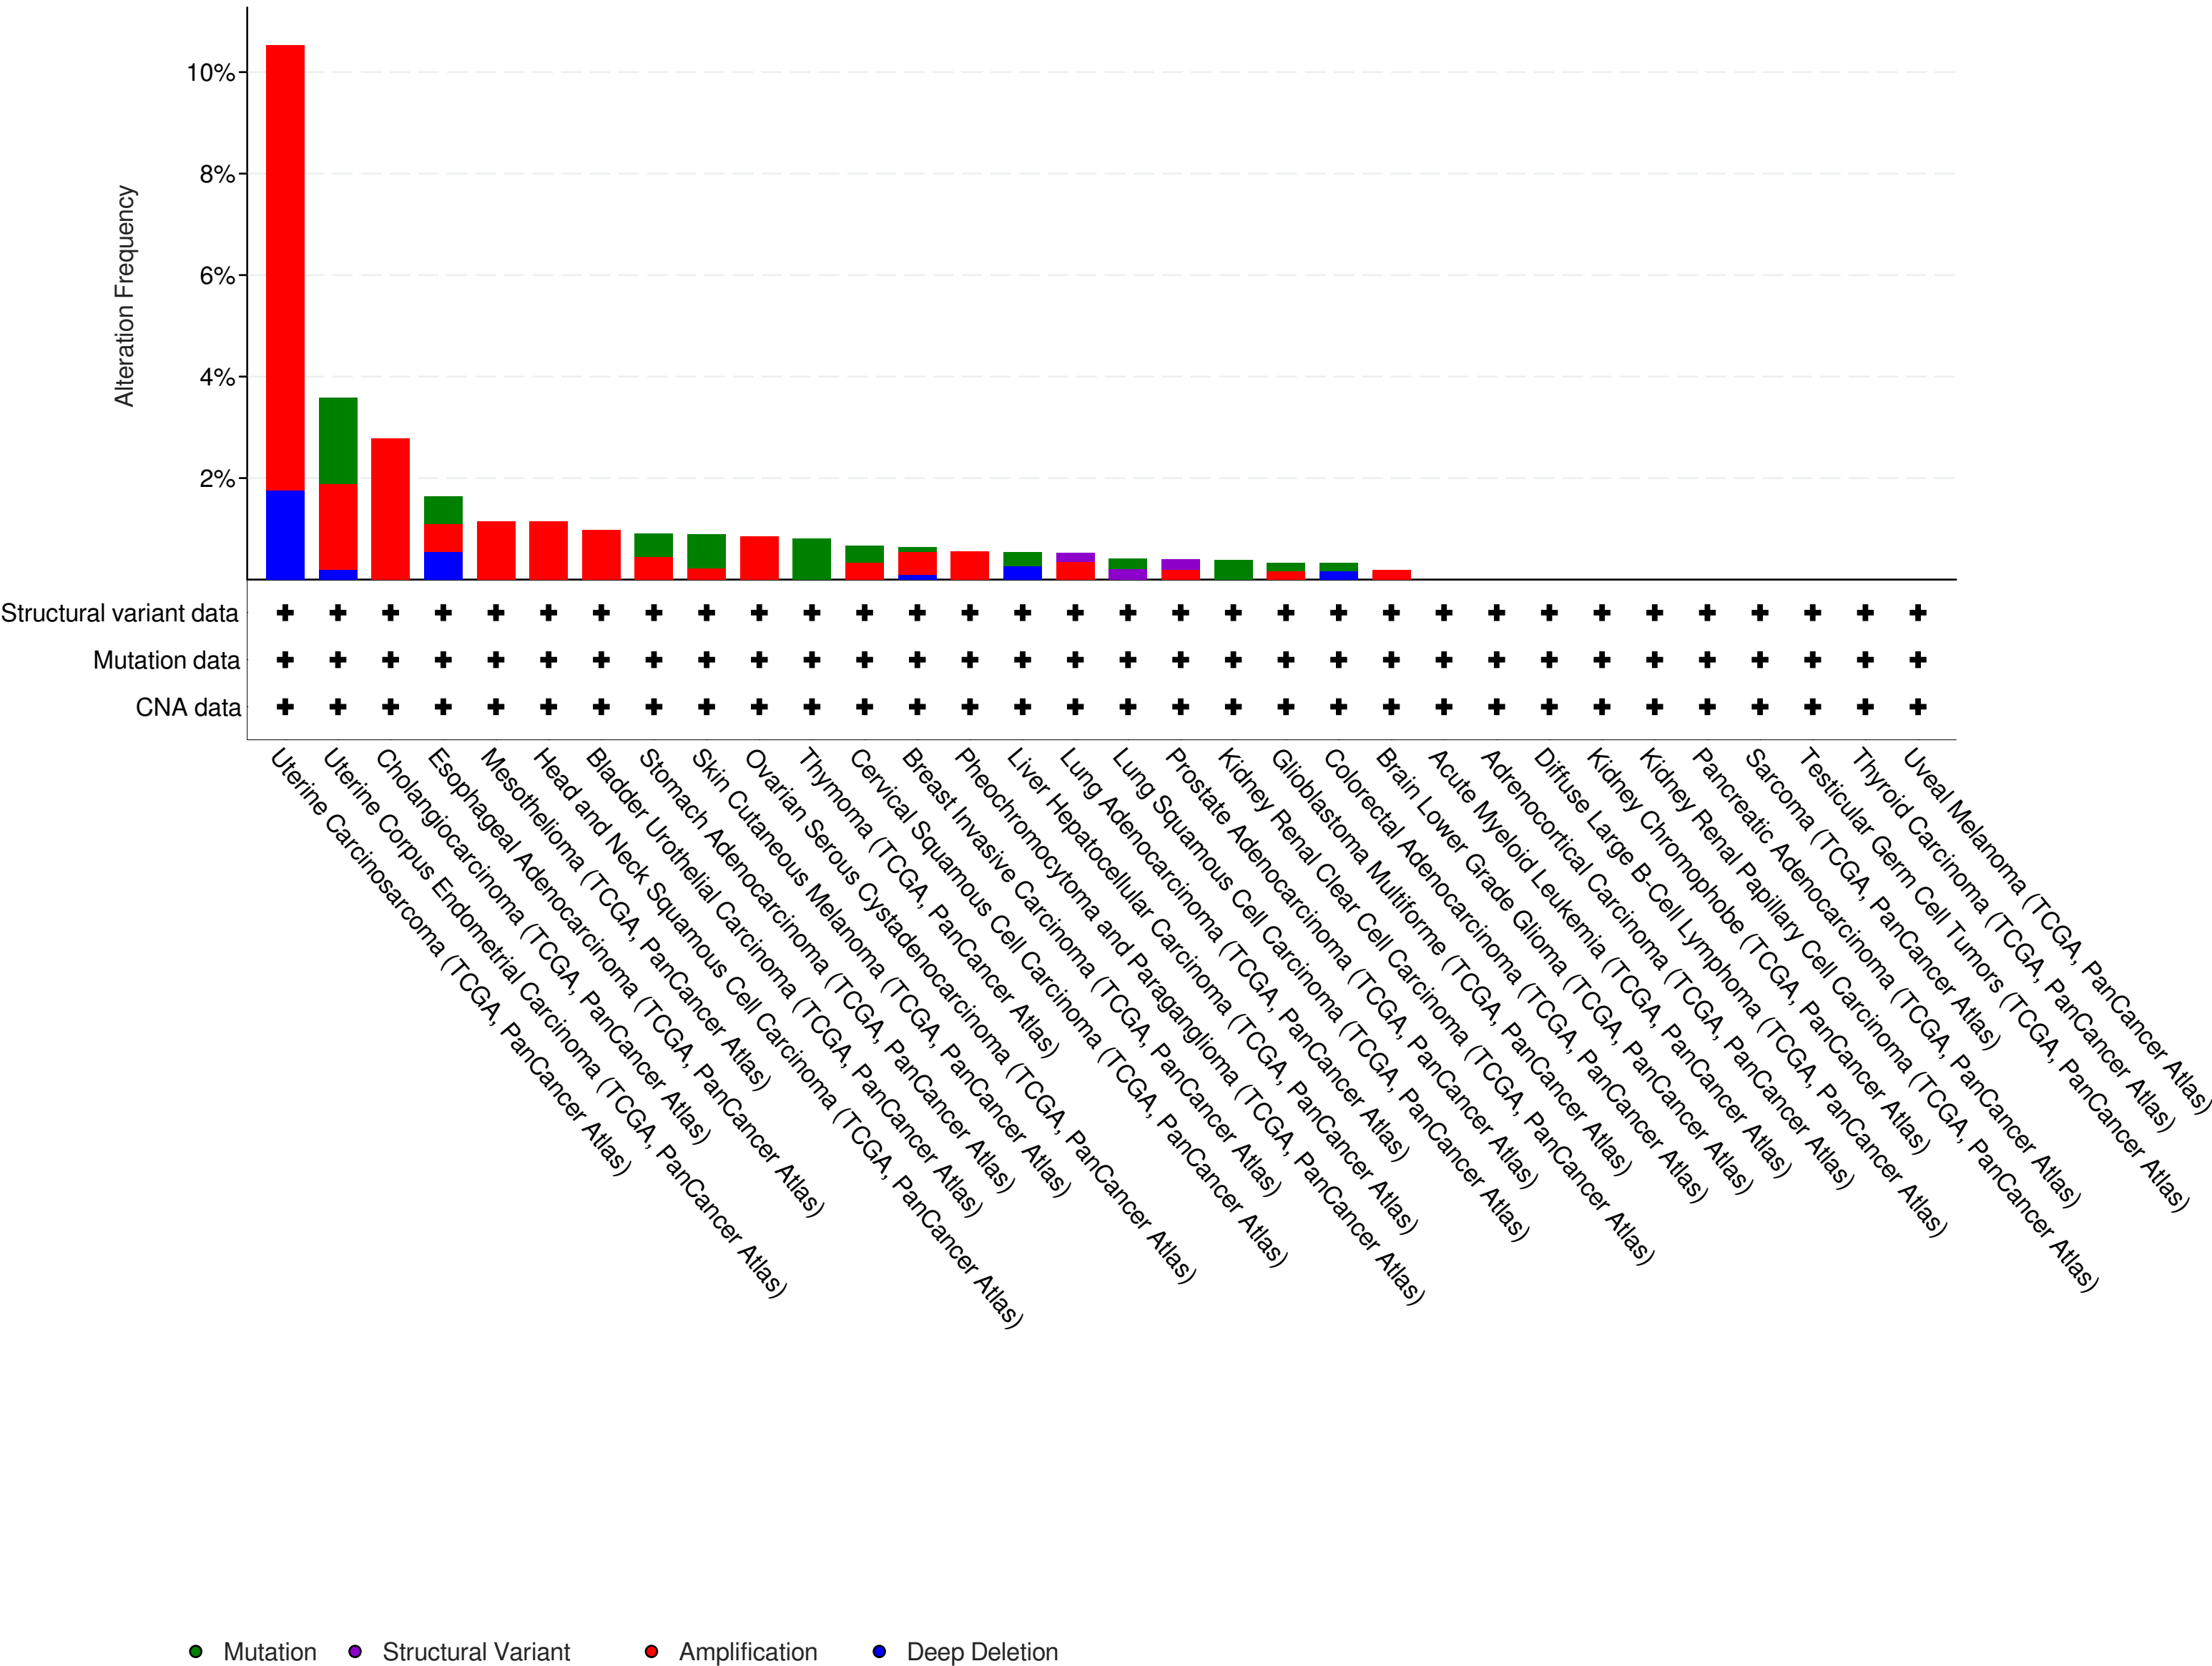

Supplement: FIG_1.zip [file FIG 1D.pdf › FIG 1/FIG 1D.pdf]

# Hazard ratio

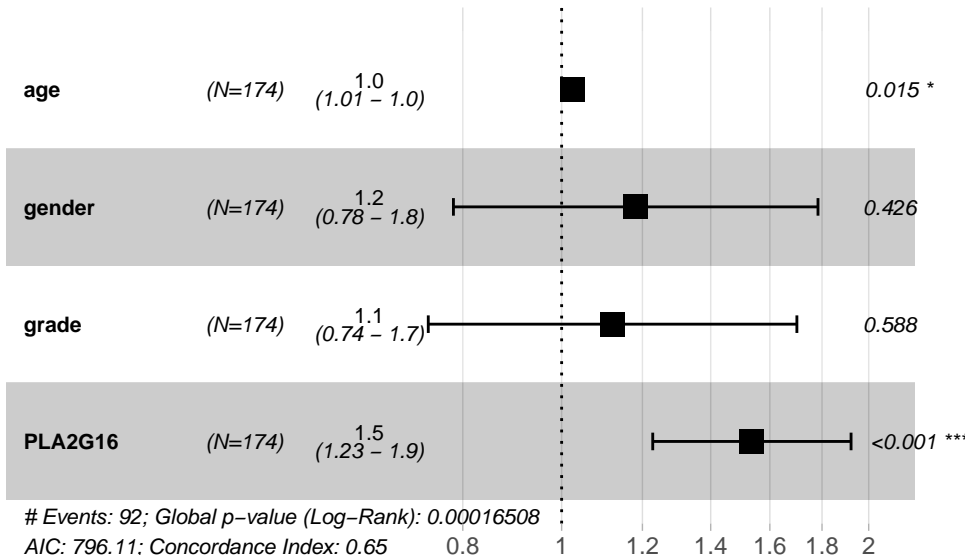

Supplement: FIG_2.zip [file FIG 2A.pdf › FIG 2/FIG 2A/FIG 2A.pdf]

# Overall Survival

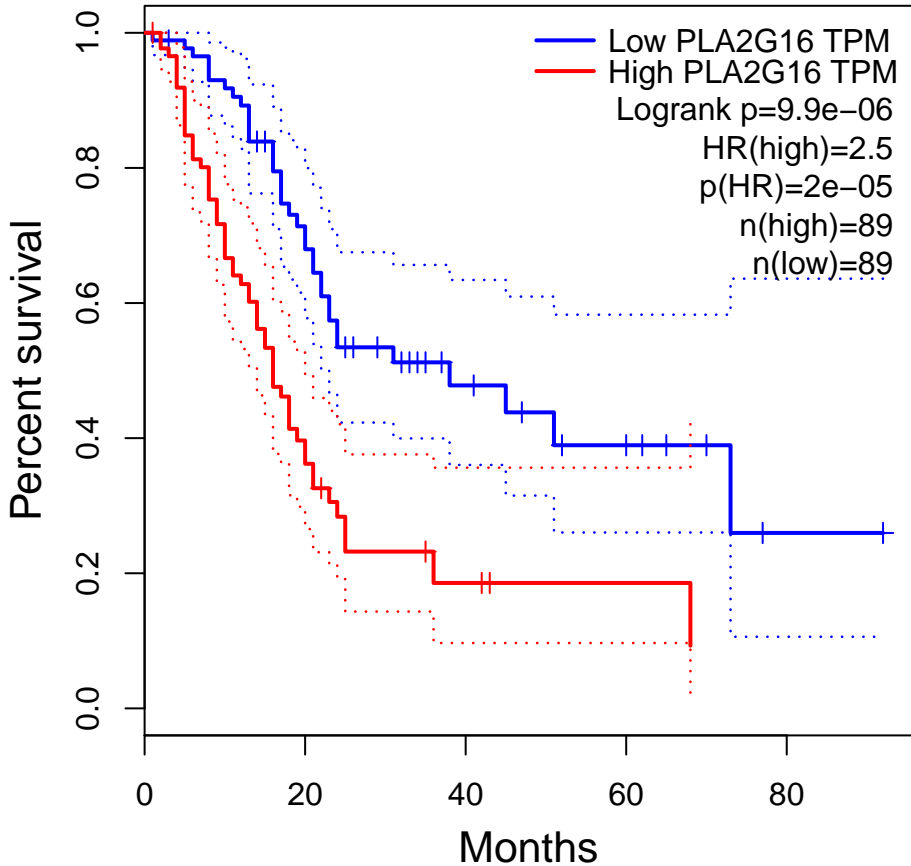

Supplement: FIG_2.zip [file FIG 2B.pdf › FIG 2/FIG 2B.pdf]

# Disease Free Survival

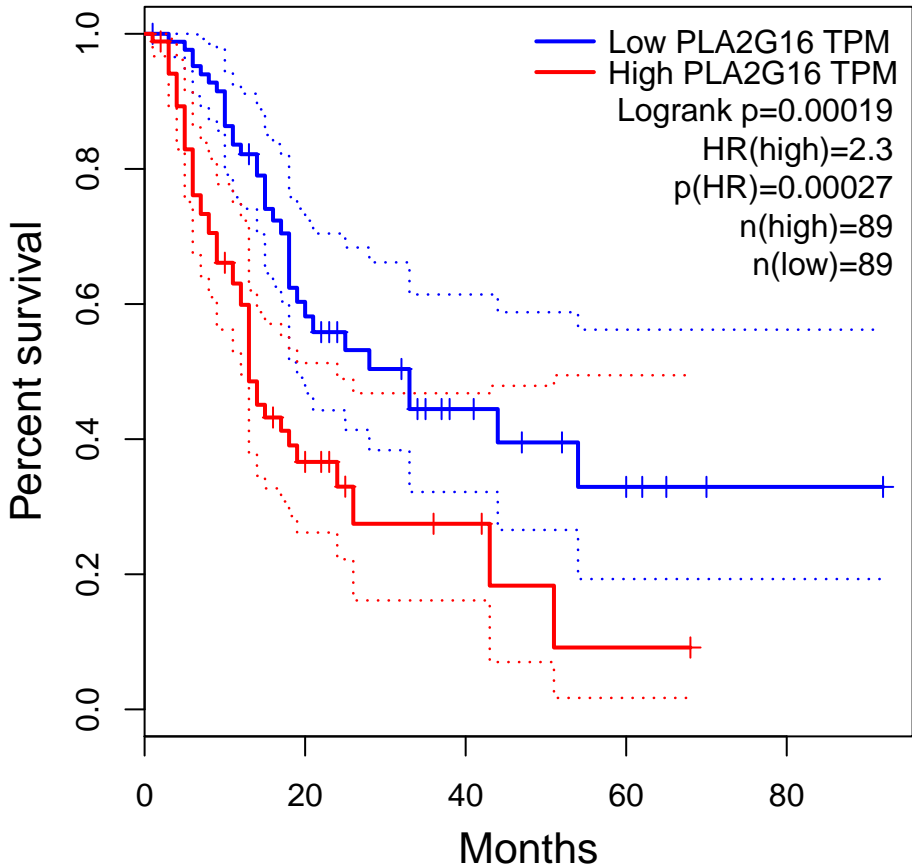

Supplement: FIG_2.zip [file FIG 2C.pdf › FIG 2/FIG 2C.pdf]

# Overall Survival

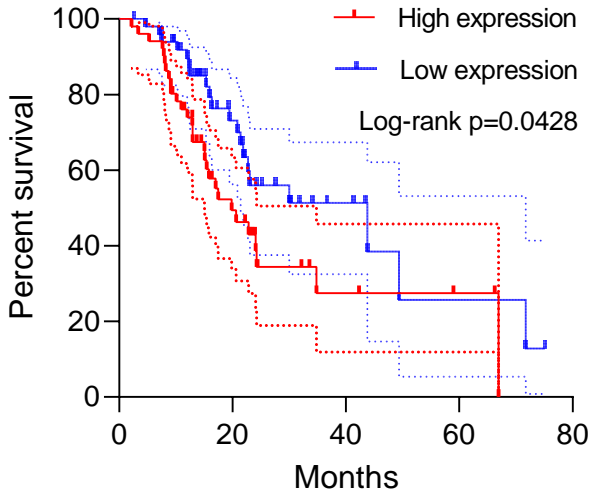

Supplement: FIG_2.zip [file FIG 2D.pdf › FIG 2/FIG 2D/FIG 2D.pdf]

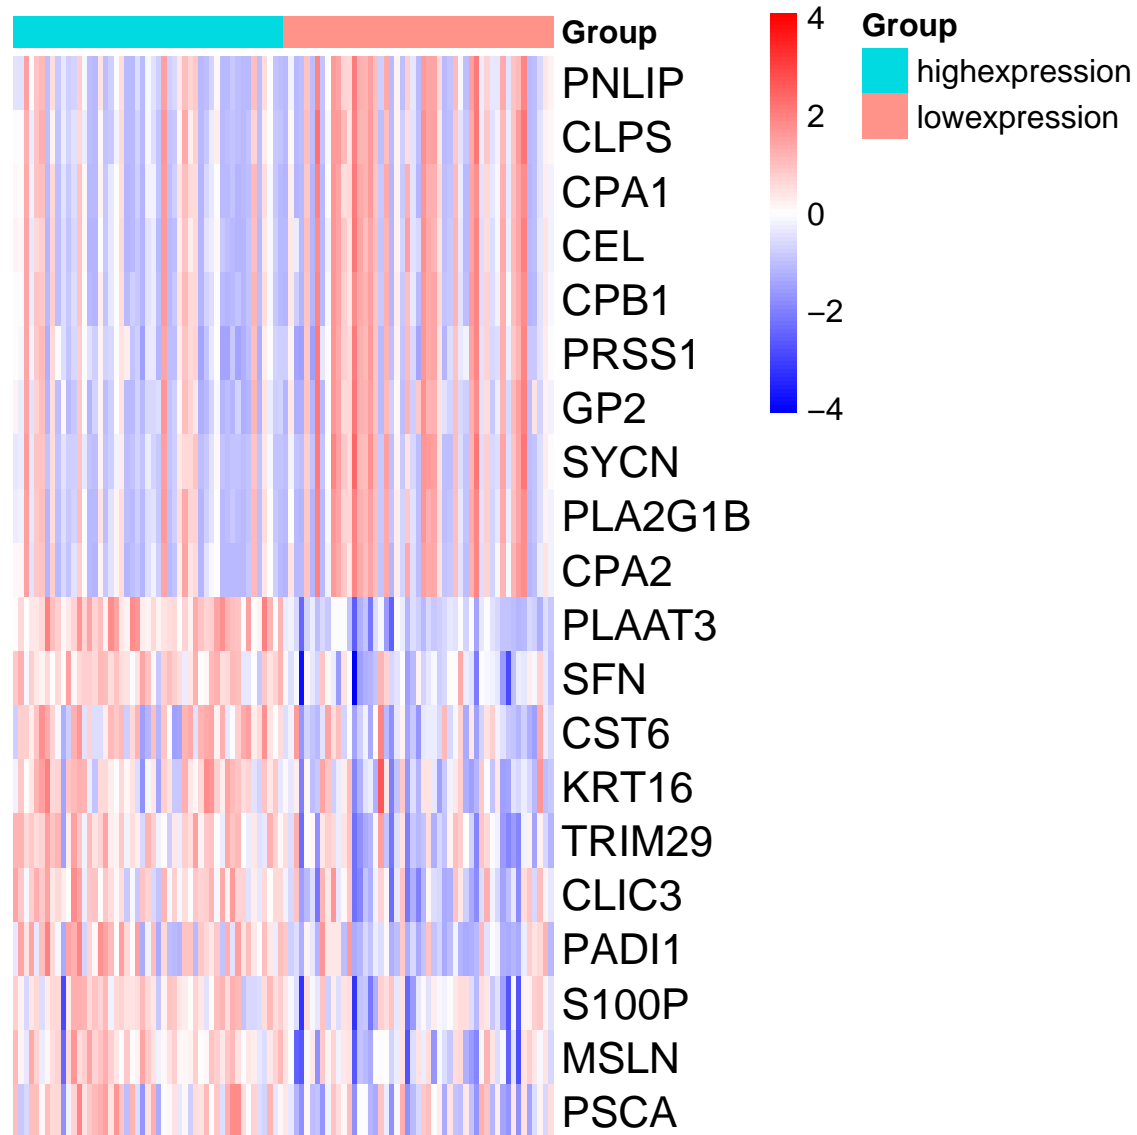

Supplement: FIG_4B-F.zip [file FIG 4B.pdf › FIG 4B-F/FIG 4B/FIG 4B.pdf]

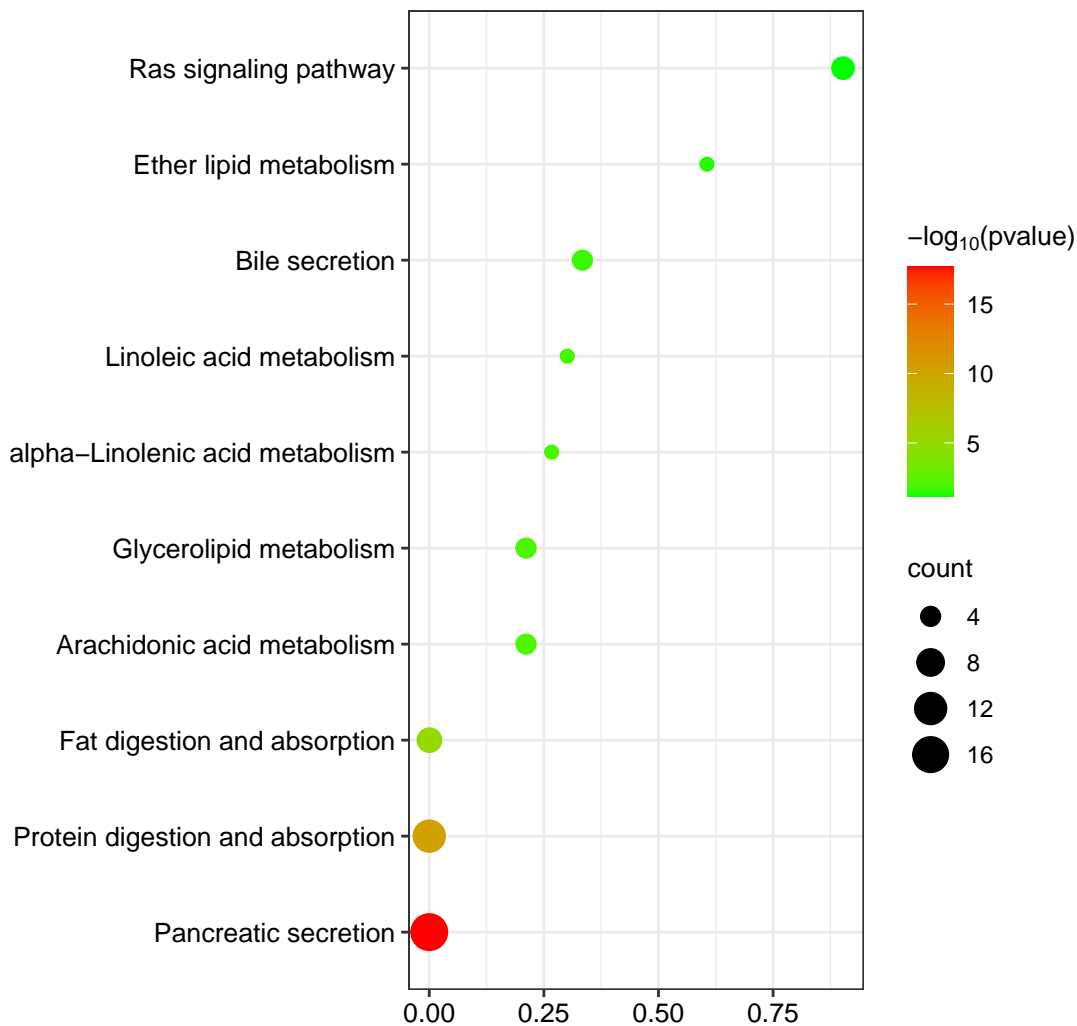

Supplement: FIG_4B-F.zip [file KEGG_PATHWAY.pdf › FIG 4B-F/FIG 4C/KEGG_PATHWAY.pdf]

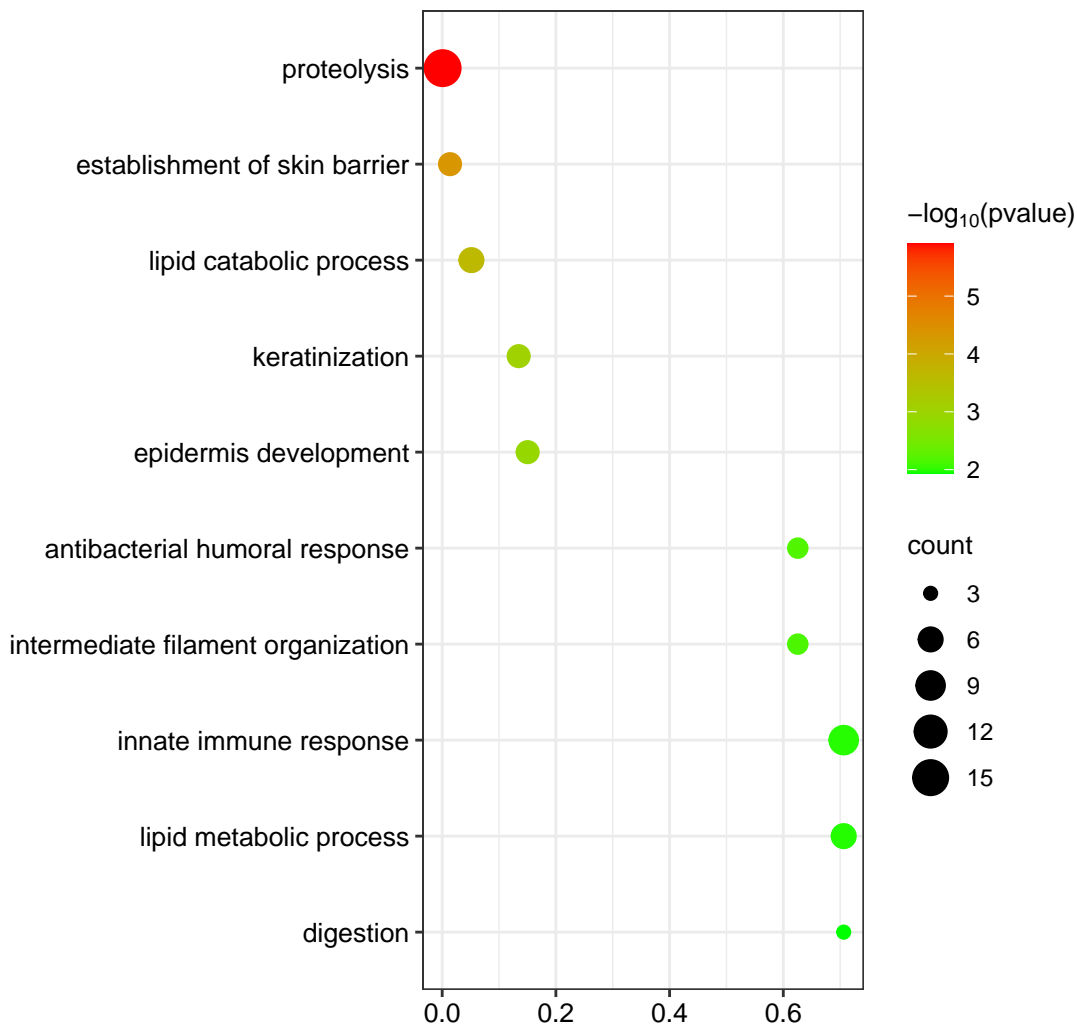

Supplement: FIG_4B-F.zip [file GO_BP.pdf › FIG 4B-F/FIG 4D/GO_BP.pdf]

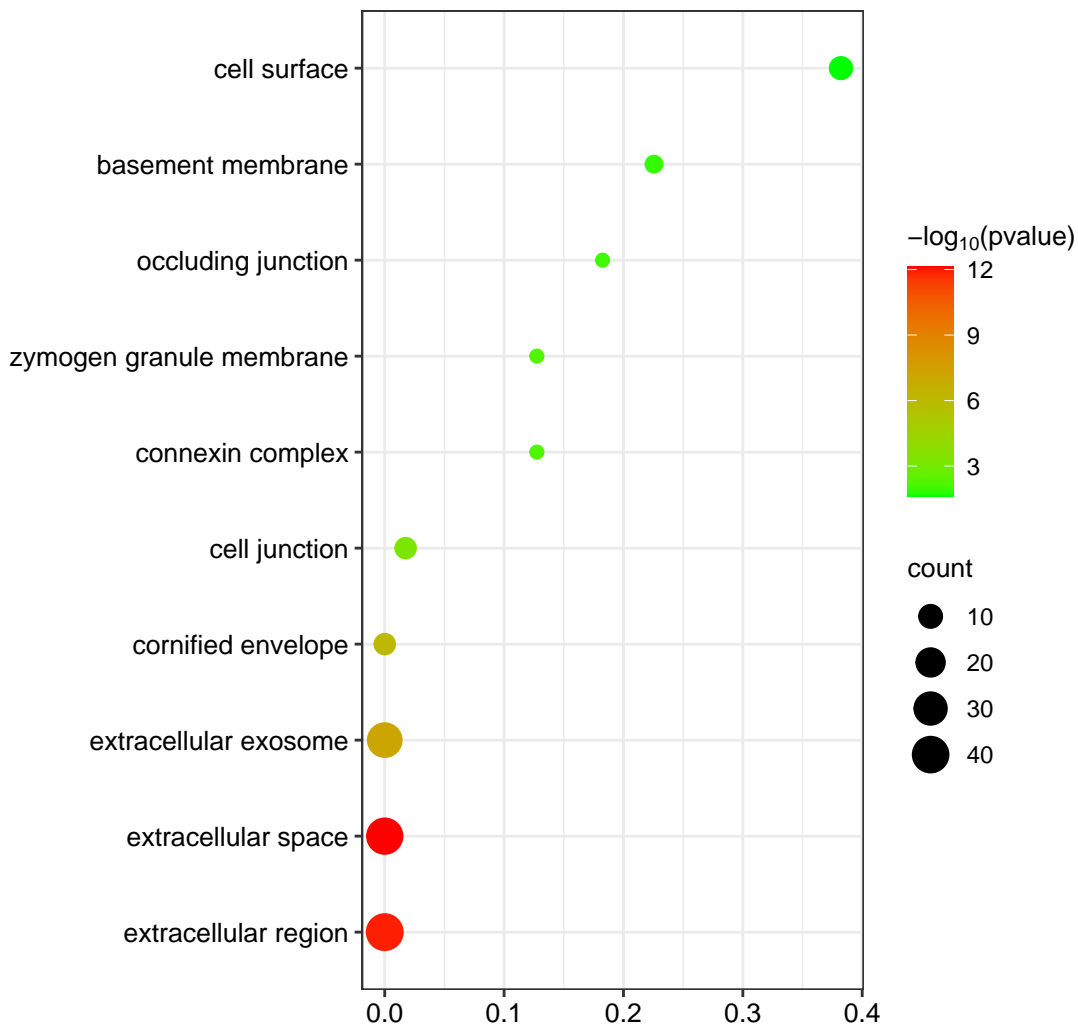

Supplement: FIG_4B-F.zip [file GO_CC.pdf › FIG 4B-F/FIG 4E/GO_CC.pdf]

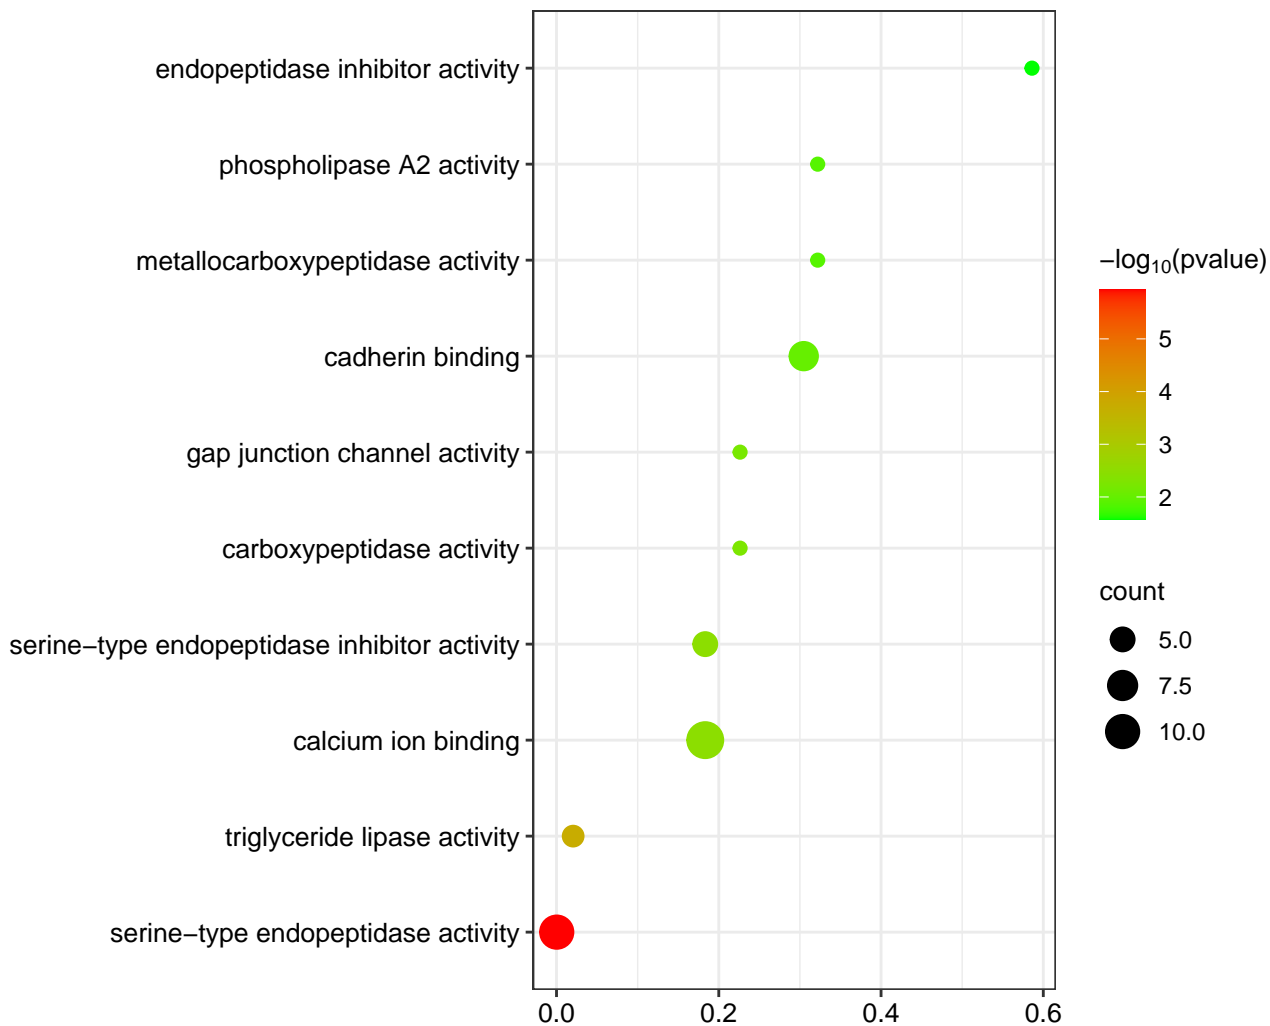

Supplement: FIG_4B-F.zip [file GO_MF.pdf › FIG 4B-F/FIG 4F/GO_MF.pdf]
